# Supplementary material for: A DARPin-based molecular toolset to probe gephyrin and inhibitory synapse biology
Source: eLife. 2022 Oct 31;11:e80895. doi: 10.7554/eLife.80895 (PMC9674349; doi:10.7554/eLife.80895)
Supplement: Figure 6—figure supplement 4—source data 1. [file elife-80895-fig6-figsupp4-data1.xlsx]

## Sheet: Sheet1
		Plotted data
		27B3	27F3	27G2		ANOVA summary
		0.00047019	0.000111202	0.000456303		F	11.36
		0.000512529	0.000159664	0.000412095		P value	0.0091
		0.000406733	0.000131422	0.000198806		P value summary	**
						Significant diff. among means (P < 0.05)?	Yes
						R square	0.7911
						Brown-Forsythe test
						F (DFn, DFd)	0,8310 (2, 6)
						P value	0.4802
						P value summary	ns
						Are SDs significantly different (P < 0.05)?	No
						Bartlett's test
						Bartlett's statistic (corrected)
						P value
						P value summary
						Are SDs significantly different (P < 0.05)?
						ANOVA table	SS	DF	MS	F (DFn, DFd)	P value
						Treatment (between columns)	1.692e-07	2	8.459e-08	F (2, 6) = 11,36	P=0,0091
						Residual (within columns)	4.468e-08	6	7.447e-09
						Total	2.139e-07	8
						Data summary
						Number of treatments (columns)	3
						Number of values (total)	9
						Number of families	1
						Number of comparisons per family	3
						Alpha	0.05
						Tukey's multiple comparisons test	Mean Diff,	95,00% CI of diff,	Significant?	Summary	Adjusted P Value
						27B3 vs. 27F3	0.0003293	0,0001131 to 0,0005455	Yes	**	0.0081	A-B
						27B3 vs. 27G2	0.0001077	-0,0001085 to 0,0003239	No	ns	0.344	A-C
						27F3 vs. 27G2	-0.0002217	-0,0004379 to -5,472e-006	Yes	*	0.0455	B-C
						Test details	Mean 1	Mean 2	Mean Diff,	SE of diff,	n1	n2	q	DF
						27B3 vs. 27F3	0.0004633	0.000134	0.0003293	7.046e-05	3	3	6.61	6
						27B3 vs. 27G2	0.0004633	0.0003557	0.0001077	7.046e-05	3	3	2.161	6
						27F3 vs. 27G2	0.000134	0.0003557	-0.0002217	7.046e-05	3	3	4.449	6
