# Supplementary material for: A DARPin-based molecular toolset to probe gephyrin and inhibitory synapse biology
Source: eLife journal article supplement (doi:10.7554/elife.80895), 2022-10-31
Supplement: supp [file elife-80895-supp-v1.zip]

Archive with 30 entries (30 files):
- elife_poa_e80895_Figure_1_figure_supplement_1.pdf
- elife_poa_e80895_Figure_2_figure_supplement_1.pdf
- elife_poa_e80895_Figure_2_figure_supplement_2.pdf
- elife_poa_e80895_Figure_3_figure_supplement_1.pdf
- elife_poa_e80895_Figure_3_figure_supplement_2.pdf
- elife_poa_e80895_Figure_3_figure_supplement_3.pdf
- elife_poa_e80895_Figure_3_figure_supplement_4.pdf
- elife_poa_e80895_Figure_4_figure_supplement_1.pdf
- elife_poa_e80895_Figure_5_figure_supplement_1.pdf
- elife_poa_e80895_Figure_5_figure_supplement_2.pdf
- elife_poa_e80895_Figure_5_figure_supplement_3.pdf
- elife_poa_e80895_Figure_5_figure_supplement_4.pdf
- elife_poa_e80895_Figure_6_figure_supplement_1.pdf
- elife_poa_e80895_Figure_6_figure_supplement_2.pdf
- elife_poa_e80895_Figure_6_figure_supplement_3.pdf
- elife_poa_e80895_Figure_1_source_data_1.pdf
- elife_poa_e80895_Figure_2_source_data_1.xlsx
- elife_poa_e80895_Figure_3_source_data_1.xlsx
- elife_poa_e80895_Figure_3_source_data_2.xlsx
- elife_poa_e80895_Figure_4_source_data_1.xlsx
- elife_poa_e80895_Figure_4_source_data_2.xlsx
- elife_poa_e80895_Figure_5_source_data_1.xlsx
- elife_poa_e80895_Figure_5_source_data_2.pdf
- elife_poa_e80895_Figure_5_source_data_3.xlsx
- elife_poa_e80895_Figure_5_source_data_4.xlsx
- elife_poa_e80895_Figure_6_source_data_1.xlsx
- elife_poa_e80895_Figure_6_source_data_2.xlsx
- elife_poa_e80895_Figure_6_source_data_3.xlsx
- elife_poa_e80895_Figure_6_source_data_4.xlsx
- elife_poa_e80895_Supplementary_file_1.docx
