# Supplementary material for: A DARPin-based molecular toolset to probe gephyrin and inhibitory synapse biology
Source: eLife journal article supplement (doi:10.7554/elife.80895), 2022-10-31

DARPin-hFc structure

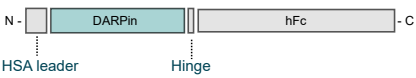

Supplement: supp [file elife-80895-supp-v1.zip]
