# Supplementary material for: A DARPin-based molecular toolset to probe gephyrin and inhibitory synapse biology
Source: eLife journal article supplement (doi:10.7554/elife.80895), 2022-10-31

**A**

No synaptic labelling

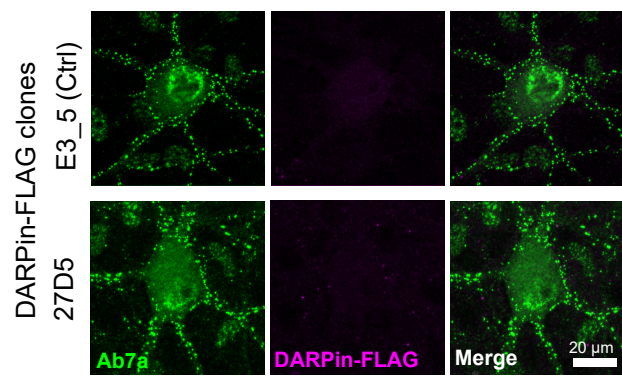**C**

Synaptic labelling, low background

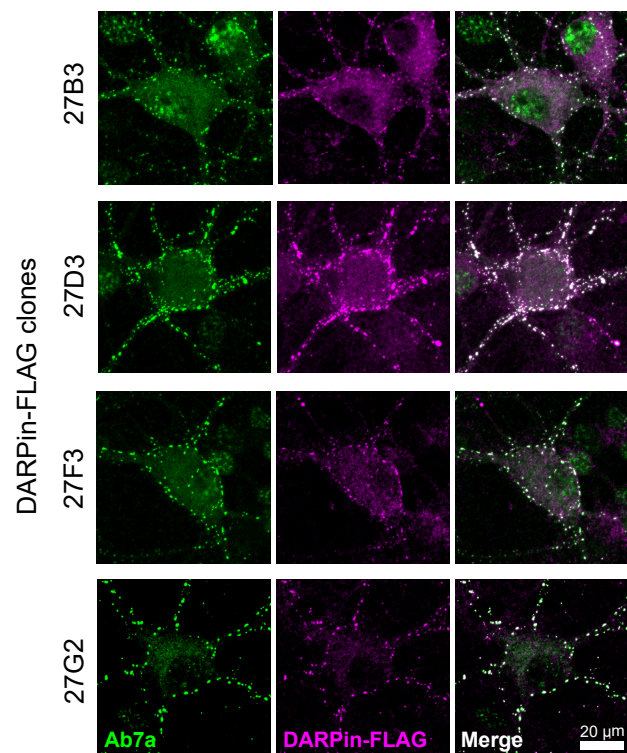**B**

Synaptic labelling, high background

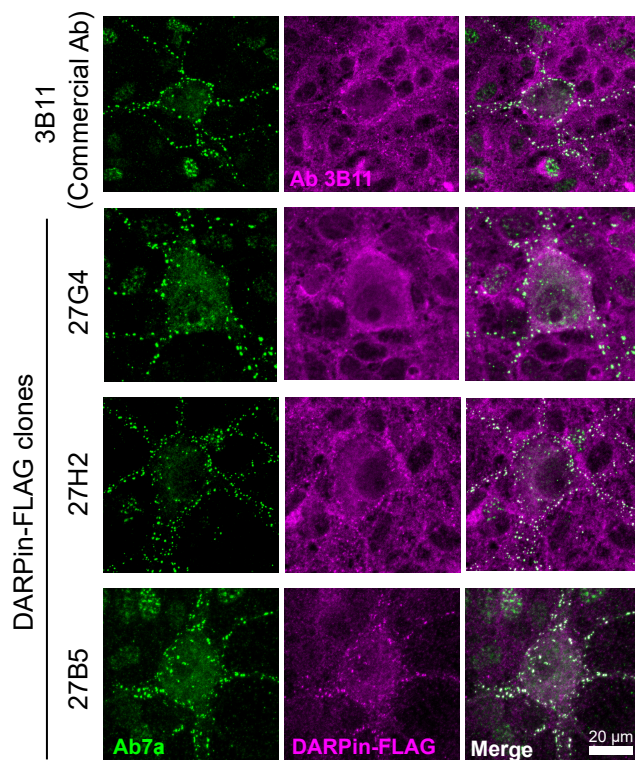

Supplement: supp [file elife-80895-supp-v1.zip › elife_poa_e80895_Figure_2_figure_supplement_1.pdf]
