# Supplementary material for: A DARPin-based molecular toolset to probe gephyrin and inhibitory synapse biology
Source: eLife journal article supplement (doi:10.7554/elife.80895), 2022-10-31
Supplement: supp [file elife-80895-supp-v1.zip › elife_poa_e80895_Figure_2_figure_supplement_2.pdf]

Selected anti-gephyrin DARPin sequences

|           | MRGS(8H)                                    | N-terminal cap                                | A.R. 1                            | A.R. 2                            | A.R. 3                          | C terminal cap | FLAG tag             |
|-----------|---------------------------------------------|-----------------------------------------------|-----------------------------------|-----------------------------------|---------------------------------|----------------|----------------------|
| Consensus | MRGSHHHHHHHGSDLGKKLLEAAIHGQLDEVRILMANGADVNA | XXGHTPLHLAAXXGHLEIVEVLLKXGADVNA               | XXGXTPHLAAXXGHLEIVEVLLKXGADVNA    | XXGXTPHLAAAXXGHLEIVEVLLKXGADVNA   | QDRWGETPFDLAAWFGNEDIAEVLQKAAKLN | NDYKDDDDK      |                      |
| 27B3      | MRGSHHHHHHHGSDLGKKLLEAAIHGQLDEVRILMANGADVNA | DLQGHHTPLHLAAKWHLEIVEVLLKTGADVNA              | EDVRGYTPHLAAWGHLEIVEVLLKHGADVNA   |                                   | QDRWGETPFDLAAWFGNEDIAEVLQKAAKLN | NDYKDDDDK      |                      |
| 27B5      | MRGSHHHHHHHGSDLGKKLLEAAFMGGHDEVRILMANGADVNA | DKAGHTPLHLAAQMGHLEIVEVLLKTGADVNA              | SDWYGYTPHLAAWGHLEIVEVLLKHGADVNA   |                                   | QDWDGNTPFDLAAWFGNEDIAEVLQKAAKLN | NDYKDDDDK      |                      |
| 27H2      | MRGSHHHHHHHGSDLGKKLLEAAARAGQDEVRILMANGADVNA | WKKGHHTPLHLAAWGHLEIVEVLLKTGADVNA              | QDMGYTPHLAAWGHLEIVEVLLKHGADVNA    |                                   | QDKFGTPFDLAAWFGNEDIAEVLQKAAKLN  | NDYKDDDDK      |                      |
| 27G2      | MRGSHHHHHHHGSDLGKKLLEAAARAGQDEVRILMANGADVNA | DFTFGYTPHLAAKEGHLEIVEVLLKTGADVNA              | IDKRGNTPHLAAWGHLEIVEVLLKHGADVNA   |                                   | QDVGITPFDLAAWFGNEDIAEVLQKAAKLN  | NDYKDDDDK      |                      |
| 27D3      | MRGSHHHHHHHGSDLGKKLLEAAARAGQDEVRILMANGADVNA | DTFGWTPLHLAAANGHLEIVEVLLKTGADVNA              | IDKRGNTPHLAAWGHLEIVEVLLKHGADVNA   |                                   | QDNFGITPFDLAAWFGNEDIAEVLQKAAKLN | NDYKDDDDK      |                      |
| 27D5      | MRGSHHHHHHHGSDLGKNNLEAAVGGQDEVRILMANGADVNA  | DFHGLTPLHLAAWHGHLEIVEVLLKTGADVNA              | DMIG..TPLHLAARVGHLEIVEVLLKAGADVNA | WDTRGRTPLHLAAWAGHLEIVEVLLKHGADVNA | QDKFGTPFDLAIDNGNEDIAEVLQKAAKLN  | NDYKDDDDK      |                      |
| 27G4      | MRGSHHHHHHHGSDLGKKLLEAAARAGQDEVRILMANGADVNA | DAKGHTPLHLAAYLGHLEIVEVLLKTGADVNA              | YDKHGHTPHLAASWGHLEIVEVLLKAGADVNA  | SDHTGRTPHLAAWGHLEIVEVLLKAGADVNA   | QDKFGTPFDLAIDNGNEDIAEVLQKAAKLN  | NDYKDDDDK      |                      |
| 27F3      | MRGSHHHHHHHGSDLGKKLLEAAARAGQDEVRILMANGADVNA | SDVVGGTPLHLAAWSGHLEIVEVLLKTGADVNA             | DMVGNTPHLAAYVGHLEIVEVLLKAGADVNA   | DDFRGRTPHLAAYYGHLEIVEVLLKHGADVNA  | QDKFGTPFDLAIDNGNEDIAEVLQKAAKLN  | NDYKDDDDK      |                      |
|           |                                             | 102030405060708090100110120130140150160170180 |                                   |                                   |                                 |                | X = Variable residue |
