# Supplementary material for: A DARPin-based molecular toolset to probe gephyrin and inhibitory synapse biology
Source: eLife journal article supplement (doi:10.7554/elife.80895), 2022-10-31
Supplement: supp [file elife-80895-supp-v1.zip › elife_poa_e80895_Figure_2_source_data_1.xlsx]

## Sheet: Panel C
	Panel C - Colocalisation fraction with VGAT
	Plotted Data						Statistical analysis results
	rAb7a	27B3	27D3	27F3	27G2		ANOVA summary
	0.83019	0.788462	0.809524	0.735849	0.82143		F	5.753
	0.83051	0.928571	0.870968	0.764706	0.78125		P value	0.0002
	0.88889	0.846154	0.74359	0.72	0.84849		P value summary	***
	0.64	0.711538	0.75	0.666667	0.45714		Significant diff. among means (P < 0.05)?	Yes
	0.75	0.717949	0.84375	0.823529	0.82759		R square	0.0799
	0.90909	0.828125	0.851852	0.702703	0.90625
	0.86207	0.681818	0.568627	0.794118	0.80952		Brown-Forsythe test
	0.75926	0.75	0.745098	0.777778	0.82222		F (DFn, DFd)	1,432 (4, 265)
	0.83333	0.816901	0.792453	0.869565	0.81132		P value	0.2235
	0.79592	0.679245	0.857143	0.672131	0.8125		P value summary	ns
	0.75862	0.645161	0.666667	0.564103	0.7451		Are SDs significantly different (P < 0.05)?	No
	0.76364	0.823529	0.675676	0.92	0.71154
	0.7	0.592593	0.74359	0.694444	0.68889		Bartlett's test
	0.69231	0.68	0.625	0.709677	0.9		Bartlett's statistic (corrected)	7.061
	0.5	0.428571	0.706897	0.793103	0.85		P value	0.1327
	0.875	0.808511	0.794118	0.678571	0.90323		P value summary	ns
	0.87805	0.871795	0.741935	0.529412	0.93333		Are SDs significantly different (P < 0.05)?	No
	0.7	0.6	0.962963	0.786885	0.84615
	0.89189	0.761905	0.756098	0.734694	0.74419		ANOVA table	SS	DF	MS	F (DFn, DFd)	P value
	0.92593	0.9	0.735294	0.716981	0.84615		Treatment (between columns)	0.3028	4	0.0757	F (4, 265) = 5,753	P=0,0002
	0.98	1	0.770833	0.448276	0.82		Residual (within columns)	3.487	265	0.01316
	0.75556	0.76087	0.608696	0.820513	0.775		Total	3.79	269
	0.84615	0.866667	0.803571	0.363636	0.84615
	0.75758	0.705882	0.744681	0.75	0.91837		Data summary
	0.66667	0.612245	0.647059	0.697674	0.88235		Number of treatments (columns)	5
	0.84615	0.787879	0.701754	0.864407	1.03226		Number of values (total)	270
	0.91228	0.913793	0.8	0.727273	0.87692
	0.83333	0.894737	0.717391	0.745763	0.83333		Number of families	1
	0.90698	0.897436	0.77551	0.875	0.74194		Number of comparisons per family	10
	0.87755	0.955556	0.77551	0.645161	0.88462		Alpha	0.05
	0.93023
	0.93939						Tukey's multiple comparisons test	Mean Diff,	95,00% CI of diff,	Significant?	Summary	Adjusted P Value
	0.95238						rAb7a vs. 27B3	0.03744	-0,02557 to 0,1005	No	ns	0.4783	A-B
	0.76087						rAb7a vs. 27D3	0.05976	-0,003251 to 0,1228	No	ns	0.0723	A-C
	0.81579						rAb7a vs. 27F3	0.09288	0,02987 to 0,1559	Yes	***	0.0006	A-D
	0.92857						rAb7a vs. 27G2	-0.009937	-0,07295 to 0,05308	No	ns	0.9926	A-E
	0.62						27B3 vs. 27D3	0.02232	-0,05903 to 0,1037	No	ns	0.9434	B-C
	0.78846						27B3 vs. 27F3	0.05544	-0,02591 to 0,1368	No	ns	0.3351	B-D
	0.79245						27B3 vs. 27G2	-0.04738	-0,1287 to 0,03397	No	ns	0.4989	B-E
	0.90909						27D3 vs. 27F3	0.03312	-0,04823 to 0,1145	No	ns	0.7968	C-D
	0.71053						27D3 vs. 27G2	-0.0697	-0,1510 to 0,01165	No	ns	0.1317	C-E
	0.76316						27F3 vs. 27G2	-0.1028	-0,1842 to -0,02147	Yes	**	0.0054	D-E
	0.78947
	0.75758						Test details	Mean 1	Mean 2	Mean Diff,	SE of diff,	n1	n2	q	DF
	0.86154						rAb7a vs. 27B3	0.8126	0.7752	0.03744	0.02294	150	30	2.308	265
	0.8913						rAb7a vs. 27D3	0.8126	0.7529	0.05976	0.02294	150	30	3.684	265
	0.95122						rAb7a vs. 27F3	0.8126	0.7198	0.09288	0.02294	150	30	5.726	265
	0.80556						rAb7a vs. 27G2	0.8126	0.8226	-0.009937	0.02294	150	30	0.6125	265
	0.86364						27B3 vs. 27D3	0.7752	0.7529	0.02232	0.02962	30	30	1.066	265
	0.77778						27B3 vs. 27F3	0.7752	0.7198	0.05544	0.02962	30	30	2.647	265
	0.80392						27B3 vs. 27G2	0.7752	0.8226	-0.04738	0.02962	30	30	2.262	265
	0.75556						27D3 vs. 27F3	0.7529	0.7198	0.03312	0.02962	30	30	1.581	265
	0.75807						27D3 vs. 27G2	0.7529	0.8226	-0.0697	0.02962	30	30	3.328	265
	0.82927						27F3 vs. 27G2	0.7198	0.8226	-0.1028	0.02962	30	30	4.91	265
	0.77419
	0.80851
	0.88889
	0.7551
	0.81818
	0.81818
	0.83019
	0.74419
	1
	0.9
	0.91892
	0.83784
	1
	0.91304
	1.02857
	0.81132
	0.65854
	0.92593
	0.70588
	0.75676
	0.89286
	0.69231
	0.64286
	0.90385
	0.80952
	0.83333
	0.28571
	0.91667
	0.42857
	0.75
	0.8718
	0.98182
	0.76
	0.71186
	0.88235
	0.81633
	0.758621
	0.8
	0.815789
	0.4
	0.857143
	0.941176
	0.702128
	0.866667
	0.745098
	0.755102
	0.765957
	0.653061
	0.74359
	0.911765
	0.857143
	0.925926
	0.90625
	0.787879
	0.902439
	0.8
	0.844444
	0.852941
	0.820513
	0.847826
	0.8125
	0.965517
	0.920635
	0.761905
	0.76
	0.88
	0.72727
	0.84615
	0.80851
	0.62069
	0.91837
	0.65625
	0.91667
	0.87805
	0.85185
	0.95745
	0.82813
	0.92308
	0.84211
	1
	0.97917
	0.93333
	0.57143
	0.81356
	0.75758
	0.83721
	0.8
	0.72857
	0.75
	0.7234
	0.92308
	1.02941
	0.93182
	0.71429
	0.41936
	0.85

## Sheet: Panel D
	Panel D - Average puncta size
	Plotted Data						Statistical analysis results
	rAb7a	27B3	27D3	27F3	27G2		ANOVA summary
	0.3982	0.4625	0.2954	0.3055	0.4266		F	10.67
	0.3042	0.3383	0.3084	0.4096	0.3318		P value	<0,0001
	0.3475	0.5352	0.2656	0.2266	0.3292		P value summary	****
	0.3044	0.3803	0.2199	0.2485	0.2064		Significant diff. among means (P < 0.05)?	Yes
	0.2182	0.2648	0.4114	0.2217	0.4036		R square	0.1387
	0.2544	0.3269	0.2517	0.3748	0.3156
	0.3543	0.3849	0.2475	0.3242	0.3649		Brown-Forsythe test
	0.278	0.3773	0.2438	0.3839	0.45		F (DFn, DFd)	2,886 (4, 265)
	0.4513	0.4137	0.305	0.3322	0.2504		P value	0.023
	0.5315	0.5136	0.2353	0.3764	0.2872		P value summary	*
	0.4048	0.4906	0.3072	0.3361	0.3488		Are SDs significantly different (P < 0.05)?	Yes
	0.3667	0.3213	0.2749	0.2797	0.4095
	0.3952	0.3887	0.255	0.3397	0.2489		Bartlett's test
	0.2796	0.4059	0.3068	0.3295	0.2652		Bartlett's statistic (corrected)	7.494
	0.307	0.2969	0.2449	0.3042	0.2687		P value	0.112
	0.3525	0.3156	0.2355	0.3123	0.418		P value summary	ns
	0.2589	0.2839	0.1625	0.3254	0.2469		Are SDs significantly different (P < 0.05)?	No
	0.5598	0.3426	0.2741	0.3238	0.4542
	0.3316	0.4622	0.2168	0.3766	0.2272		ANOVA table	SS	DF	MS	F (DFn, DFd)	P value
	0.3197	0.3542	0.3034	0.3255	0.4534		Treatment (between columns)	0.2703	4	0.06756	F (4, 265) = 10,67	P<0,0001
	0.3474	0.3008	0.2754	0.2329	0.2794		Residual (within columns)	1.678	265	0.006333
	0.2835	0.2936	0.2615	0.2649	0.2521		Total	1.948	269
	0.3813	0.3652	0.261	0.2791	0.231
	0.4303	0.448	0.3191	0.148	0.3655		Data summary
	0.2886	0.2422	0.2691	0.2418	0.3593		Number of treatments (columns)	5
	0.2582	0.2781	0.2731	0.3209	0.3355		Number of values (total)	270
	0.3001	0.2515	0.514	0.1793	0.3389
	0.3277	0.3412	0.2938	0.3082	0.2993		Number of families	1
	0.3345	0.3381	0.2938	0.2376	0.3406		Number of comparisons per family	10
	0.2869	0.2801	0.2938	0.1822	0.4189		Alpha	0.05
	0.4721
	0.3257						Tukey's multiple comparisons test	Mean Diff,	95,00% CI of diff,	Significant?	Summary	Adjusted P Value
	0.4662						rAb7a vs. 27B3	0.004921	-0,03879 to 0,04864	No	ns	0.998	A-B
	0.2283						rAb7a vs. 27D3	0.0842	0,04049 to 0,1279	Yes	****	<0,0001	A-C
	0.4405						rAb7a vs. 27F3	0.06982	0,02611 to 0,1135	Yes	***	0.0002	A-D
	0.2957						rAb7a vs. 27G2	0.03396	-0,009754 to 0,07768	No	ns	0.2089	A-E
	0.3959						27B3 vs. 27D3	0.07928	0,02285 to 0,1357	Yes	**	0.0013	B-C
	0.3875						27B3 vs. 27F3	0.0649	0,008467 to 0,1213	Yes	*	0.0151	B-D
	0.3775						27B3 vs. 27G2	0.02904	-0,02740 to 0,08548	No	ns	0.6196	B-E
	0.4198						27D3 vs. 27F3	-0.01438	-0,07082 to 0,04206	No	ns	0.9564	C-D
	0.2988						27D3 vs. 27G2	-0.05024	-0,1067 to 0,006193	No	ns	0.1067	C-E
	0.3345						27F3 vs. 27G2	-0.03586	-0,09230 to 0,02057	No	ns	0.408	D-E
	0.327
	0.3085						Test details	Mean 1	Mean 2	Mean Diff,	SE of diff,	n1	n2	q	DF
	0.3219						rAb7a vs. 27B3	0.3649	0.3599	0.004921	0.01592	150	30	0.4373	265
	0.2589						rAb7a vs. 27D3	0.3649	0.2807	0.0842	0.01592	150	30	7.482	265
	0.4081						rAb7a vs. 27F3	0.3649	0.295	0.06982	0.01592	150	30	6.204	265
	0.338						rAb7a vs. 27G2	0.3649	0.3309	0.03396	0.01592	150	30	3.018	265
	0.2842						27B3 vs. 27D3	0.3599	0.2807	0.07928	0.02055	30	30	5.457	265
	0.4863						27B3 vs. 27F3	0.3599	0.295	0.0649	0.02055	30	30	4.467	265
	0.3509						27B3 vs. 27G2	0.3599	0.3309	0.02904	0.02055	30	30	1.999	265
	0.2431						27D3 vs. 27F3	0.2807	0.295	-0.01438	0.02055	30	30	0.9897	265
	0.3973						27D3 vs. 27G2	0.2807	0.3309	-0.05024	0.02055	30	30	3.458	265
	0.402						27F3 vs. 27G2	0.295	0.3309	-0.03586	0.02055	30	30	2.468	265
	0.3882
	0.3107
	0.488
	0.2887
	0.3102
	0.3102
	0.4368
	0.4896
	0.311
	0.4292
	0.2875
	0.5294
	0.3933
	0.5568
	0.6216
	0.4796
	0.4025
	0.4354
	0.4576
	0.3512
	0.406
	0.4037
	0.406
	0.5273
	0.4206
	0.496
	0.2516
	0.366
	0.2806
	0.2033
	0.2829
	0.5075
	0.2537
	0.4176
	0.3578
	0.2894
	0.4056
	0.2974
	0.2938
	0.2199
	0.3587
	0.279
	0.4743
	0.3333
	0.2297
	0.5391
	0.2815
	0.355
	0.3175
	0.2725
	0.4624
	0.3702
	0.3456
	0.4632
	0.3563
	0.4264
	0.3284
	0.2493
	0.2727
	0.3403
	0.3835
	0.3377
	0.3935
	0.4226
	0.3932
	0.3843
	0.4556
	0.1908
	0.372
	0.3344
	0.3025
	0.3678
	0.4066
	0.3883
	0.3707
	0.3747
	0.3942
	0.319
	0.4751
	0.3116
	0.4316
	0.623
	0.4665
	0.2816
	0.2625
	0.5742
	0.3173
	0.3886
	0.3222
	0.3154
	0.3236
	0.295
	0.3279
	0.4326
	0.4837
	0.2608
