# Supplementary material for: A DARPin-based molecular toolset to probe gephyrin and inhibitory synapse biology
Source: eLife journal article supplement (doi:10.7554/elife.80895), 2022-10-31
Supplement: supp [file elife-80895-supp-v1.zip › elife_poa_e80895_Figure_3_source_data_1.xlsx]

## Sheet: Panel D
	Panel D: Effect of Purvalanol A on relative Ab7a to 27G2 fluorescence intensity
	Untreated Intensity			Purvalanon treated intensity					Intensity ratio averaged by neuron					Statistical analysis
	27G2	rAb7a		27G2	rAb7a				CTRL	5 μM PurvalanolA				Unpaired t test
	146.068	92.1525		162.422	16				0.63562	0.100315				P value	<0,0001
	133.419	67.3871		166.358	14.8868				1.00725	0.117891				P value summary	****
	139.682	87.5227		165.874	23.5852				0.625515	0.170716				Significantly different (P < 0.05)?	Yes
	125.345	12.5172		143.053	17.2368				0.670446	0.112411				One- or two-tailed P value?	Two-tailed
	131	78.2121		158.964	16.1818				0.881465	0.199134				t, df	t=26,65, df=57
	150.907	71.9867		137.744	31.186				0.68583	0.128152
	142.317	98.4286		171.923	37.0577				0.684282	0.137956				How big is the difference?
	201.141	94.6848		155.9	24.76				0.703968	0.177432				Mean of column A	0.7659
	182.983	102.06		144.115	10.6538				0.72783	0.18675				Mean of column B	0.1372
	177.143	114.234		153.767	12.4333				0.622573	0.225197				Difference between means (B - A) ± SEM	-0,6287 ± 0,02359
	167.247	90		142.821	38.6154				0.702924	0.166722				95% confidence interval	-0,6759 to -0,5815
	137.062	74.7188		149.192	27.0769				0.680668	0.261503				R squared (eta squared)	0.9257
	183.398	141.675		214.479	19.3662				0.684084	0.134436
	167.071	64.6071		162.038	10.3654				0.920835	0.141831				F test to compare variances
	180.069	124.706		134.8	16.96				0.971497	0.15775				F, DFn, Dfd	7,472, 28, 29
	148.35	70.3		168.306	12.7258				0.718503	0.162599				P value	<0,0001
	266.821	173.385		123.692	15.1923				0.745041	0.152175				P value summary	****
	189.414	138.224		169.227	13.1667				0.785935	0.140997				Significantly different (P < 0.05)?	Yes
	151.979	76.6383		155.488	6.1463				0.819125	0.14601
	170.649	106.739		144.056	8.4444				0.82638	0.072349				Data analyzed
	174.613	112.4		149.356	10.6271				1.01197	0.085214				Sample size, column A	29
	171.153	111.047		140.92	24.4				0.818922	0.118939				Sample size, column B	30
	203.263	76.0404		146.935	12.9355				1.00455	0.100716
	279.099	155.421		144.417	16.4583				0.751783	0.107689
	208.747	135.726		144.826	8				0.706372	0.122439
	165.348	108		149.05	11				0.581629	0.075291
	163.633	112.127		135.482	17.9259				0.775072	0.086567
	130.774	83.2581		155.562	1				0.722644	0.081888
	232.183	159.943		154.366	15.7073				0.738312	0.137383
	254.97	147.023		160.635	11.3654					0.107444
	153.73	127.45		142.139	20.0278
	159.26	84.7788		149.071	16.3571
	141.667	64.7917		153.706	12.7647
	157.079	110.27		138.517	27.0345
	162.028	113.319		185.023	31.5116
	134.607	112.357		157.786	15.7753
	158.407	79.1186		145.97	16.8485
	161.192	122.615		131.88	15.4
	134.72	19.36		139.043	10.8696
	195.205	144.859		158.231	33.3077
	151.814	63.4651		154.71	10.129
	191.778	127.359		136.76	12.68
	226.724	139.076		141.811	10.5676
	187.153	153.798		163.965	16.431
	179.943	116.83		131.741	9.0741
	158.465	69.6977		162.344	5.5938
	284.541	201.931		179.846	11.9231
	197.615	140.077		153.865	17.6757
	142.821	95.9744		161.982	17.9636
	241.488	156.294		169.483	19.6207
	151.933	101.483		154.209	17.3023
	215.419	114.93		142.692	7.7949
	169.353	98.5294		165.487	10.2478
	260.125	144.176		161.179	11.6154
	227.017	129.102		172.585	11.7925
	235.237	177.918		158.031	12.4062
	277.425	180.471		164.161	14.4516
	160.867	82.1333		161.018	13.193
	216.694	114.866		189.244	17.6648
	236.781	121.755		139.242	12.8788
	189.488	91.15		195.271	14.3229
	194.918	150.25		172.337	21.6067
	198.101	106.855		152.833	15.2143
	209.677	155.232		179.274	10.9863
	150.454	134.394		181.283	7.1739
	233.287	129.278		147.94	29.24
	134.727	60.3636		221.847	20.5833
	138.464	67.3571		178.712	15.3699
	167.125	106.589		158.413	23.9565
	157.889	4.5556		169.261	14.5217
	193.255	99.3511		157.208	8.2917
	134.038	70.4231		152.981	13.1731
	182.716	135.803		197.945	10.4375
	167.013	121.546		175.167	13.1
	135.489	67.5106		149.318	11.7955
	255.541	181.801		186.288	27.3333
	168.571	96.4381		126.944	39.25
	182.509	99.4528		180.024	16.9756
	167.359	60.9688		157.982	10.3636
	279.353	183.854		163.892	15.3919
	252.691	187.787		167.63	9.4074
	244.203	114.553		190.286	17.873
	149.056	104.139		190.454	7.7273
	190.624	94.9373		175.017	10.9573
	213.489	148.712		194.62	17.506
	185.575	108.9		197.819	17.7708
	184.048	90.0161		168.208	15.875
	169.788	116.808		174.979	14.6596
	238.276	160.772		156.133	16.2889
	225.955	150.822		209.625	18.4615
	226.667	168.922		199.291	19.4818
	240.757	160.513		175.833	9.5
	200.722	77.4056		170.417	11.5278
	200.885	140.802		176.333	19.3623
	167.382	96.6324		185.155	8.8873
	166.753	106.796		163.258	16.0968
	190.988	122.659		175.692	14.1319
	160.889	114.067		156.865	9.3077
	154.524	98.8571		185.159	17.4444
	231.681	186.953		162	9.6071
	274.366	165.024		168.776	17.6034
	179.719	128.5		142.943	15.9143
	188.893	141.471		147.385	10.8462
	156.852	113.77		177.118	16.8816
	220.509	196.671		141.234	4.8085
	376.371	6.1857		164.793	13.7241
	218.093	156.972		196.641	15.3786
	151.27	105.162		181.797	12.5524
	124.679	90.7143		134.585	28.9024
	131.823	92.4412		131.32	7.28
	167.558	90.3377		133.6	7.24
	173.973	103.4		148.352	14.0741
	213.056	153.921		126.038	21.5385
	180.595	160.675		158.092	11.1385
	209.065	172.734		143	6.6047
	187.245	123.238		134.781	11.3438
	163.81	116.947		143.115	11.7692
	226.217	120.975		142.706	18.0882
	193.417	135.783		132.696	6.6522
	224.642	188.784		158.541	12.5246
	152.662	120.588		161.071	17.0808
	189.87	141.514		143.538	11.5385
	202.526	138.943		125.077	33.3462
	274.098	210.638		186.238	27.2936
	188.06	126.309		138.348	8.0435
	178.147	88.0133		129.885	23.3462
	169.83	110		149.282	9.2051
	183.768	106.317		135.056	16.0278
	207.954	145.503		147.94	19.3134
	135.533	73.9556		151.128	31.1277
	200.893	73.4369		171.648	12.8864
	130.407	76.7778		176.735	22.1103
	210.218	170.286		181.03	21.0448
	140.703	75.5405		201.037	17.9625
	261.116	208.305		206.621	22.9158
	160.526	131.263		155.973	16.1351
	295.464	225.966		174.8	23.5455
	161.5	123.324		213.372	15.6795
	258.215	218.484		165.235	17.3137
	150.349	103.907		203.414	24.6034
	139.017	86.8305		180.926	17.963
	139.417	110.611		172.667	27.2333
	143.059	108.823		168.161	20.2321
	191.488	154.726		212.965	35.3588
	152.083	138.542		192.509	27.0702
	161.578	103.311		186.418	17.1091
	137.167	99.0417		197.75	11.2222
	129.16	69.84		186.38	19.3803
	170.674	141.093		235.644	32.4703
	232.723	181.141		198.468	28.038
	202.056	117.673		209.044	21.0202
	164.983	120.317		164.116	12.7209
	167.667	101.487		187.572	25.442
	162.826	101.13		193.271	17.4299
	190.007	142.503		178.25	16.0769
	166.137	110.822		153.364	14.9091
	187.106	111.023		149.5	18.5
	126.533	80.4		245.454	51.097
	169.283	159.387		228.07	49.02
	155.718	119.026		201.496	21.2314
	137.238	68.0952		187.548	17.2055
	212.112	177.743		144	14.6471
	207.245	167.946		177.412	28.5686
	169.986	95.4648		235.418	20.9235
	164.91	130.42		190.417	44.9167
	165.393	198.23		206.04	18.4803
	156.028	192.625		153.29	25.9677
	220.271	106.144		204.471	14.7354
	190.776	215.872		188.288	13.9242
	203.806	202.65		205.672	30.8151
	233.275	301.217		256.177	37.0289
	172	42.7895		159.261	16.3043
	167.041	248.633		144.87	10.8696
	208.385	110.115		171.741	13.963
	148.156	240.778		192.842	28.5
	159.109	124.182		196.741	24.6034
	164.111	213.148		200.94	33.46
	163.085	205.208		253.531	27.9054
	162.78	195.26		184.453	12.1321
	154.71	130.316		192.012	30.6341
	164.061	141.044		223.568	49.8561
	151.893	147.643		160	33.5143
	192.685	193.511		169.889	18.963
	165.433	161.033		243.404	32.202
	200.793	264.079		206.485	13.8182
	166.5	134.125		276.07	28.5122
	159.811	64.7838		250.119	25.4218
	166.852	101.278		183.739	17.4783
	153.275	201.575		231.733	24.9667
	160.362	196.914		173.31	14.9286
	161.75	179.821		135.143	5.3036
	185.08	82.24		194.299	18.7931
	172.608	192.825		202.381	21.1905
	211.404	232.732		194.651	28.8532
	162.618	173.4		178.774	11.5806
	154.143	138.457		146.643	32.4643
	189.215	210.4		149.08	6.32
	180.427	198.073		207.852	14.0984
	148.071	163.167		231.249	14.8908
	165	4.5128		188.849	15.3836
	156.933	28.7556		204.716	18.8358
	162.914	199.707		196.01	27.39
	166.164	143.473		247.771	23.3893
	164.22	46.1707		171.738	22.8852
	172.167	239.524		209.511	27.7133
	190.406	150.078		192.19	17.5238
	158.22	136.366		226.699	18.1786
	184.339	166.873		167.436	8.7436
	177.711	188.407		157.24	5.64
	213.178	64.2556		240.402	23.3841
	168.82	191.7		238.171	35.943
	160.017	120.345		220.961	24.8341
	170.944	148.917		209.653	22.4694
	167.868	97.0789		173.871	17
	215.398	218.99		197.324	10.973
	209.965	159.426		177.115	21.9016
	161.061	166.333		153	17.5556
	190.394	102.349		172.525	22.425
	157.208	52		239.678	41.9231
	295.287	47.5661		252.97	24.1777
	165.487	229.615		154.828	20.4483
	176.458	97.0833		165.971	15.4706
	175.083	167.417		195.581	17.8605
	154.25	152.292		170.444	15.5185
	170.949	23.0256		132.395	10.7907
	153.875	196.125		190.984	12.7031
	179.85	240.1		161.577	24.3077
	171.046	135.454		236.544	31
	191.698	271.429		173.391	17.7391
	172.238	212.833		153.72	21.84
	206.052	201.406		184.208	14.6981
	144.758	63.8485		218.077	27.5641
	188.397	250.191		184.667	10.7667
	160.29	227.323		154.207	16.069
	158.282	207.769		245.123	24.9744
	180.392	134.529		238.118	14.4471
	151.167	162.667		167.87	11.5
	161.706	212.333		191.292	27.2769
	125.038	4.6154		186.161	23.3871
	183	56.3571		219.396	17.6306
	172.207	159.586		165.69	19.4138
	175.593	206		161.778	17.8148
	188.645	227.87		220.859	24.0625
	235.426	286.652		201.159	17.7536
	184.87	229.87		184.265	26.4082
	166.837	134.791		189.254	15.0282
	172.36	245.08		205.457	29.5543
	163.558	156.372		238.113	38.0514
	192.839	168.885		213.674	29.5116
	154.903	257		158.633	22.6667
	176.113	225.225		204.819	21.4819
	189.951	141.35		217	35.6944
	212.387	187.573		224.876	25.3251
	160.56	160.34		215.06	17.86
	166.521	220.5		193.483	50.5172
	183.626	60.989		189.5	76.5556
	174.833	163.972		169.306	16.9184
	156.586	181.483		193.652	16.7217
	163.2	29.9143		167.194	23.75
	153.471	231		257.909	45.2524
	182.444	267.957		176.807	15.0175
	188.478	227.471		155.542	10.625
	146.648	142.958		194.128	20.6809
	219.978	214.92		191.081	15.7973
	161.78	99.14		193.542	16.8434
	141.2	201.171		187.79	14.6842
	311.038	9.1443		219.628	21.1395
	189.086	212.81		263.057	32.3503
	154.778	166.296		209.13	50.6957
	168.75	232.562		152.893	12.3929
	156.655	197.172		180.179	8.4286
	163.233	229.553		193.528	8.8333
	161.48	261.14		218	18.3239
	183.464	197.333		190.246	16.5538
	202.603	266.849		193.206	15.6618
	150.953	121.062		152.087	12.6522
	176.13	207.8		143.696	17.8261
	206.961	188.282		216.949	22.7692
	157.429	130.238		212.778	47.8503
	194.463	146.567		205.061	10.6364
	161.269	226.365		219.694	17.4254
	164.853	237.16		212.625	9.9464
	194.394	242.227		217.88	19.18
	143.706	114.765		205.846	23.7885
	170.96	186.46		178.489	11.0889
	198.607	194.679		184.167	25.9615
	194.817	235.675		212.742	16.197
	191.329	190.898		180.156	75
	205.644	192.981		182.685	63.0274
	204.925	270.656		193.04	15.4
	205.157	201.843		154.172	17.1724
	172.6	89.0615		207.23	52.3793
	192.277	237.12		189.28	38.96
	153.622	109.649		184.25	11.0294
	142.6	72.84		182.969	51.0312
	162.566	158.849		206.434	40.1132
	149.256	171.051		190.392	20.0261
	188.102	212.943		209.846	14.0128
	238.058	50.699		234.494	31.8944
	209.267	8.56		224.119	25.2321
	270.192	11.9894		262.865	38.7243
	164.734	247.646		263.509	24.6726
	147.579	177.421		228.163	23.2
	260.906	11.2374		161.559	9.2941
	166.206	241.873		209.077	44.6538
	177.698	305.058		152.885	22.8846
	177.245	221.193		200.025	14.1405
	198.865	142.18		213.25	18.5769
	142.914	157.429		205.426	24.3136
	196.869	191.944		144.433	1.7667
	181.72	223.953		186.55	22.35
	168.138	164.954		184.855	41
	199.568	262.086		191.663	19.625
	235.414	4		198.141	16.2394
	137.387	230.387		172.862	9.4828
	169.103	248.353		162.897	20.9828
	213.793	226.85		170.922	23.6333
	150	234.204		205.432	15.9099
	179.538	249.603		159.241	10
	152.167	181.267		207.489	23.266
	159.261	215.043		157.513	17.8718
	167.8	176.691		222.105	42.2016
	210.867	5.1067		179.652	25
	160.091	232.758		210.496	31.9735
	151.889	179.926		185.98	17.7755
	162.683	142.195		164.935	10.0323
	169.877	221.825		192.105	12.2105
	173.965	174.477		200.97	34.25
	161.049	148.244		224.383	19.8047
	167.373	156.451		202.386	30.3931
	218.308	234.045		185.281	30.4062
	157.636	158.03		199.793	23.8581
	171.165	295.392		150.786	14.5357
	185.742	204.925		159.795	5.8718
	135.406	160.406		174.609	34.1654
	139.522	138.174		155.214	9.25
	175.846	189.4		237.223	40.1848
	153.827	1.6538		238.029	35.8186
	176.517	337.385		161.026	26.1538
	162.127	197.673		148.9	17.875
	175.185	292.972		179.087	25.8478
	154.076	227.566		178.015	16.2239
	170.596	219.17		170.58	30.42
	143	172.326		158.655	15.2759
	199.095	237.176		148.154	12.5385
	253.706	267.092		148.276	13.2759
	172.962	229.769		253.956	28.076
	181.488	234.063		164.763	11.2895
	147.436	213.782		205.393	21.865
	148.875	196		155.139	17
	136.56	175.24		162.71	13.1613
	164.208	204.667		164.615	15.2308
	135.783	182.478		199.15	24.25
	187.157	258.085		220.511	40.1773
	234.731	247.065		168.792	15.3333
	193.239	26.7313		160.444	20.3704
	138.407	73.0741		209.144	29.2158
	180.275	98.2857		161.345	10.4545
	160.377	83.4754		221.1	32.4857
	143.3	204.7		246.021	26.9792
	160.429	144.619		173.786	26.1786
	174.738	80.1231		213.613	28.0453
	156.961	159.686		173.01	23.3905
	154.982	114.582		186.288	28.9076
	172.02	96.898		193.417	28.315
	155.723	72.9787		181.178	33.3288
	136.478	93.9565		151.094	14.5625
	187.641	144.456		156.167	12.5
	157.375	132		216.488	43.9752
	139.842	135.974		168.083	32.5972
	156.271	3.2292		172.298	26.3191
	162.77	146.72		152.583	15.4375
	155.884	92.3953		179.446	13.3373
	144.568	74.9773		172.04	20.74
	150.559	105.088		149.118	34.6863
	151.933	101.033		170.857	27.8
	154.962	105.132		154.971	22.4
	157.244	144.551		133.63	18.6296
	153.351	106.27		177.913	24.3623
	164.509	115.641		220.759	31.8656
	157.6	88		169.875	29.0938
	163.576	119.78		153.138	40.954
	147.893	135.893		154.27	19.2162
	138.512	109.756		184.69	21.6552
	178.269	106.776		156.818	12.8788
	164.985	125.552		156.533	11.5667
	127.783	112.13		165.333	12.1667
	195.582	98.2941		182.122	20.4797
	151.068	75.3409		164.763	8.4474
	152.796	67.9796		177.48	14.04
	185.855	166.113		154.25	31.3542
	218.109	155.641		178.339	7.7679
	148.781	73.6562		167.75	20.2708
	145.068	108.364		148.679	46.4151
	196.872	134.177		156.28	32.9355
	178.155	106.121		156.759	21.7037
	164.517	70.069		163.125	26
	209.604	134.181		158.947	18.3684
	198.336	101.965		147.482	36.2222
	159.037	94.8333		161.933	14.8667
	144.962	105.115		156.742	11.6452
	190.263	104.939		174.279	33.0368
	139.639	82.0833		158.111	8.5926
	171.979	132.255		150.269	10.4231
	204.222	127.37		143.353	10.6176
	175.136	119.42		147	9.0833
	192.759	150.965		171.632	28.4912
	170.623	82.5574		156.154	34.0769
	111.154	55.2308		183.109	24.7636
	186.46	151.54		198.794	32.1507
	148.31	128.103		137.483	29
	138.096	46		179.368	14.8971
	193.953	139.753		149.333	17.0833
	127.739	32.4783		170.522	6.8222
	197.482	113.691		158.059	10.1765
	213.544	128.868		174.5	43.4722
	186.933	85.3		157.696	9.5217
	161.816	108.079		176.595	27.8571
	194	22.0189		142.161	46.6452
	225.564	104.17		153.375	29.15
	188.216	26.2941		179.663	24.7965
	189.027	91.6216		154.182	69.0682
	156.24	99.04		155.113	17.3099
	157.151	81.3636		141.985	16.8614
	231.978	126.246		143.674	25.6512
	178.91	136.493		154.104	23.7708
	153.159	100.5		147.086	10.6286
	176.987	72.4416		181.75	23.8438
	160.327	119.612		154.791	28.7674
	175.895	81		224.593	37.4222
	143.548	59.0238		154.778	22.7778
	175.622	26.9189		157.71	10.7105
	144.634	119.439		219.057	44.3491
	159.614	100.25		140.68	14.64
	165.875	117.319		161.449	44.6087
	183.722	124.944		219.639	51.8423
	201.578	81.2889		180.597	34.8209
	176.647	75.7451		175.137	15.6375
	170.149	88.6809		174.136	45.6061
	147.3	93.4		177.214	35.5238
	185.195	106.919		200.081	53.0404
	129.28	37.88		170.778	37.8519
	139.286	83		141.2	25.4857
	175.516	127.188		153.802	36.8242
	150.962	54.9615		158.465	16.9535
	148.889	63.7778		157.372	2.6047
	142.372	128.395		168.76	19.72
	208.657	127.069		153.242	21.7879
	167.859	107.75		144.133	21.5667
	223.963	131.262		152.872	15.9744
	179.802	74.0349		167.097	18.6774
	163.05	111.5		173.471	34.0429
	147.202	55.9367		157.894	18.234
	180.308	92.8462		166.25	21.4375
	150.688	117.438		150.754	15.7193
	161.485	111.864		123.049	9.6829
	182.169	105.8		165.137	15.5294
	143.484	165.581		165.679	47.7857
	150.217	84.6087		179.373	57.1961
	192.205	108.538		179.944	47.4352
	162.225	82.85		159.758	29.0303
	164.3	206		146.596	28.5192
	166.534	180.612		145.778	15.5556
	139.875	81.7083		145.849	35.3939
	191.167	87.2083		154.491	20.9091
	153.659	98.3182		136.44	13.88
	172.725	159.145		172.954	48.1385
	133.207	73.1724		190.581	39.093
	136.483	225.862		138.564	14.641
	165.172	155.759		137.6	30.96
	160.175	125.158		186.357	45.8843
	164.932	139.119		170.143	25.6286
	160	103.684		147.97	12.1061
	150.7	118.667		133.759	27.7241
	160.693	137.027		173.448	27
	145.154	78.9615		163.125	25.9167
	129.846	5.3462		166.069	36.4713
	144.345	2.2069		160	18.1111
	139.756	100.341		166.647	34.0588
	141.083	134.806		169.886	16.1772
	139.944	137.778		173.575	23.8298
	157.421	104.645		187.169	28.4026
	147.447	100.526		137.393	20.7143
	140.139	161.93		160.073	29.0244
	148.846	128.641		176.189	20.4054
	137.926	25.5556		153.022	6.5652
	148.438	86.6562		132.821	44.75
	144.83	149.151		180.027	33.8356
	137.852	10.7778		167.139	50.0233
	148.646	9.3542		158.333	25.4333
	170.533	9.45		153.971	30.0294
	150.324	15.8108		156.778	50.6667
	199.343	35.9357		173.925	20.075
	158.98	128.06		154.867	10.0333
	150.902	160.195		139.6	12.2857
	159.788	148.758		143.854	49.6829
	255.45	47.7815		158.755	41.3061
	163.553	6.5		143.686	38.4571
	160.581	41.9302		160.059	23.4118
	142.344	37.25		152.805	37.1707
	146.791	119.721		185.357	25.9524
	143	159.04		157.976	33.3171
	150.688	155.156		152.917	52.875
	158.645	51.2258		154.939	21.1515
	172	117.25		170.867	36.9778
	136.838	98.5946		184.274	74.0242
	206.997	153.561		159.062	24.1875
	195.969	113.031		159.487	24.7692
	200.103	123.276		148.875	46.3
	187.165	148.125		158.825	37.4563
	169.933	133.7		154.607	24.4262
	191	106.078		173.859	21.9062
	151.065	102.742		194.162	34.0286
	180.128	124.769		151.714	33.5714
	171	95.6		148.633	21.7
	158.038	68.5385		138.214	53.3571
	204.589	118.504		177.752	51.4957
	153.37	111.889		158.108	24.0541
	172.771	62.3714		207.642	22.8632
	211.904	144.776		171.967	24.6
	178.981	111.132		134.515	12.2727
	181.854	81.3659		153.077	19.3846
	196.159	121.041		179.429	37.7175
	189.395	140.917		156.197	34.2787
	195.633	133.653		162.23	43.541
	187.586	89.2069		169.031	39.2245
	208.421	115.887		197.128	31.7766
	150.433	139.4		138.138	32.8276
	205.225	136.219		149.182	24.303
	160.323	45.9032		158.582	24.2727
	167	64.641		153.438	24.1458
	182.312	95.25		128.5	21.8333
	187.468	122.183		148.636	37.6667
	175.893	121.607		139	19.3478
	201.947	170.053		152.417	14.0278
	198.298	102.688		172.611	13.6806
	196.417	128.125		163.65	23.6
	186.846	100.674		138.5	27.7917
	210.455	90.9061		157.5	18.8
	199.176	137.121		141.857	17.5357
	208.483	117.78		144.792	34.4583
	188.303	81.9806		136.923	23.3462
	153.037	145.37		178.508	33.918
	192.607	208.066		141.151	13.0303
	193.986	87.7465		144.2	33.5333
	259.232	182.734		169.02	25.38
	180.717	151.887		157.895	32.5789
	184.526	134.905		175.115	33.25
	161.843	81		153.038	46.4103
	197.757	113.388		188.088	29.8509
	172.907	103.605		174.974	28.359
	158.5	108.075		148.513	22.4103
	201.182	117.351		181.132	46.2353
	164.697	76.303		151.825	30.1754
	172.966	87.8475		166.435	34.8261
	158.907	105.116		169.143	27.7143
	184.959	149.37		158.197	55.7049
	137.167	130		155.489	42.6222
	160.739	161.565		160.122	45.2114
	171.409	112.682		148.69	14.6905
	181.97	194.02		168.517	23.3103
	191.467	109.201		162.015	25.6269
	155.051	102.692		163.88	21.2133
	182.034	129.627		163.685	23.1481
	166.884	101.581		156.856	13.5222
	157.216	103.081		186.019	51.233
	174.038	78.6981		149.621	25.2069
	154.261	96		174.533	48.6087
	172.51	132.392		161.9	20.1
	170.141	61.8873		172.719	6.0312
	197.435	141.576		177.596	24.9808
	151.895	124.237		196.208	40.7264
	187.06	130.581		177.855	36.3548
	167.571	79.5844		168.663	27.7952
	166.179	74.8571		157.214	21.2143
	178.073	114.912		166.571	26.6286
	209.812	107.797		173.829	41.0244
	188.031	89.0938		167.824	36.4815
	203	98.9068		173.591	22.9318
	217.339	177.14		141.156	19.9375
	162.138	147.621		156.397	37.5
	215.633	121.2		156.592	29.7755
	224.976	158.625		176.716	14.2162
	199.541	172.512		175.264	16.1667
	188.18	117.77		155.838	8.5676
	156.756	54.6098		178.888	18.7416
	165.062	62.7344		163.125	13.2708
	156.941	83.6765		132.333	11.4444
	167.438	54.8125		162.829	14.3553
	151.191	115.468		156.875	18.3125
	183.949	117.251		194.122	16.7973
	168.035	106.759		150.852	16.963
	181.252	106.242		161.237	14.4211
	188.812	78.3438		196.529	13.7353
	169.512	138.726		164.647	10.6078
	211.277	116.16		178.824	9.916
	173.362	171.121		162.634	17.0149
	171.583	141.604		187.844	9.0815
	165.029	110.371		171.491	14.9245
	185	176.837		167.5	16.1944
	169.469	71.875		148.826	14.6304
	207.725	128.78		208.333	8.2632
	215.089	121.679		183.031	8.8769
	173.508	83.1429		150.6	12.0286
	179.569	102.216		178	18.1754
	173.793	135.5		158.314	12.2
	153.382	112		140.158	8.1579
	196.495	125.782		187.472	14.592
	195.132	118.677		161.524	29.7619
	147.25	90.4286		151.585	11.0732
	202.851	96.4206		175.225	12.975
	183.919	107.452		180.531	9.7959
	202.294	153.553		170.509	42.6038
	178.5	25.3462		193.464	13.8095
	170.712	61.9231		183.863	17.4118
	188.222	84.5741		163.648	67.7273
	193.154	79.5		213.913	17.7991
	198.168	125.495		200.07	11.4767
	180.849	119.136		199.698	21.6912
	197.886	76.9873		141.433	54.3667
	178.779	141.688		171.855	10.2319
	195.331	73.6466		174.533	16.8833
	210.315	135.986		142.518	9.5185
	186.54	102.299		176.7	19.45
	209.447	81.5658		173.227	16.8182
	201.248	112.409		192.714	23.1948
	190.532	90.2581		134.308	27.5
	187.701	79.2597		182.568	8.9545
	164.784	82.6275		183.357	20.5714
	200.571	114		167.41	48.8974
	179.34	138.585		159.242	7.697
	196.67	135.66		172.2	17.26
	195.297	228.406		168.296	20.9091
	169.847	131.25		188.929	11.5
	156.894	77.9787		179.335	20.4072
	229.832	201.552		217.524	20.2286
	170.547	107.984		177.577	64.6923
	157.204	114.898		211.866	32.3503
	166.162	84.3378		212.1	19.4738
	234.821	212.123		237.472	26.5739
	231.227	87.64		159.889	17.6111
	197.115	176.062		165.537	33.8519
	158.696	115.804		217.568	19.661
	163.477	106.091		190.905	15.4286
	156.214	128.071		161.265	32.4706
	155.231	115.269		147.448	19.6207
	165.19	80.0238		160.84	21.22
	175.774	100.183		163.161	4.9355
	175.153	8.1017		175.689	56.6604
	180	111.226		186.3	15.2
	169.358	114.56		225.367	37.4279
	228.864	172.96		148.4	20.2
	167.051	94.8205		171.464	16.4643
	167.562	142.838		153.818	20.0606
	184.9	97.46		173.27	31.7143
	153.342	140.21		210.029	26.3865
	168.343	141.164		153.13	15.5185
	158.871	99.2903		156.833	11.5208
	158.468	128.468		204.5	21.0217
	170.155	109.722		162.564	24.6
	137.31	82.1379		161.871	11.6129
	163	145.814		146.567	13.9667
	159.979	79.0833		190.524	14.4897
	162.844	105.219		158.157	12.1765
	151.897	95.3846		151.487	14.2162
	170.284	158.482		183.571	31.8929
	187.953	111.118		152.125	9.0417
	164.296	114.337		188.298	18.7888
	172.358	63.0488		134.385	14.0769
	154.102	104.041		126.167	14.8056
	141.55	125.525		156.304	16.4565
	174.31	96.0476		116.964	7.5714
	201.622	153.192		152.731	15.0769
	185.766	115.74		157.462	12.2692
	172.566	133.009		141.237	15.4211
	174.433	152.776		220.826	27.2778
	158.457	118.435		150.259	8.0741
	164.87	105.5		194.622	14.9189
	141.667	114.296		175.375	18.625
	168.925	153.15		176.458	6.7324
	166.125	93.75		176.177	15.9412
	170.167	114.033		165.127	20.4789
	181.784	74.1799		190.811	19.6415
	187.558	143.433		155.139	12.5116
	159.76	124.96		180.98	12.098
	181.69	97.2241		175.667	12.6377
	159.152	119.196		161.182	10.3939
	176.982	181.5		154.062	12.5938
	144.333	117.25		233.963	21.1126
	174.965	105.579		172.691	14.1031
	166.649	84.2807		171.348	11.2826
	168.062	180.771		163.611	34.5278
	179.238	122.536		141.758	25.5152
	166.772	113.386		209.207	23.8
	171	162.277		165.016	25.6774
	160.536	139.107		160.937	12.3797
	154.606	139.182		157.609	15.1304
	171.472	108		157.895	26.8684
	163.433	136.067		196.047	18.5
	151.426	122.444		194.916	24.6265
	165.681	92.1064		205.782	25.1523
	167.422	97.9531		171.735	20.6373
	170.763	129.526		147.477	17.0227
	195.64	112.4		166.462	13.4872
	184.569	105.639		151	23.7826
	171.309	120.951		144.348	39.8261
	151.64	72.64		146.281	34.4062
	147.575	119.7		166.882	38.3137
	128.821	81.2857		165.964	37.4286
	150.679	12.8929		167.449	48.8367
	153.283	167.528		172.586	40.9429
	189.947	149.831		158.892	43.3243
	150	79.1842		185.607	19.5714
	175.069	95.9041		165.521	53.3542
	154.1	109.233		138.292	38.7917
	162.231	145.154		144.25	20.3929
	169.809	119.83		151.792	37.75
	226.158	186.251		165.303	25.6067
	144.833	84.1667		137.733	55.8
	152.242	92.0909		152.538	60.6154
	169.633	125.583		153.722	17
	154.222	91.3333		181.231	20
	184.538	198.22		156.516	23.2258
	184.701	163.43		168.397	25.746
	144.267	106.967		164.395	29.2093
	158.2	108.16		164.767	28.7333
	175.417	142.708		157.086	31.9143
	143.892	98.7568		179.129	29.1613
	178.894	157.245		201.419	16.9516
	139.057	91.1429		181.296	38.9718
	166.46	110.1		154.63	25.1111
	188.684	114.684		183.875	23.7143
	172.671	158.25		155.312	15.6875
	147.839	96.6429		166.429	26.2571
	178.979	121.062		174.976	25.4268
	151.509	125.474		160.696	32.4348
	134.462	122.462		174.725	24.5652
	152.269	89.1154		158.44	31.86
	174.767	173.367		168.944	29.5741
	159.152	122.761		190.66	39.18
	177.62	127.986		195.923	15.5192
	174.615	182.423		134.875	18.3333
	167.526	106.579		158.29	19.9355
	211.837	193.935		195.869	34.2459
	160.448	91.7586		177.293	30.6585
	203.208	172.04		125.88	9.38
	154.216	135.811		118.375	24.875
	180.96	175.632		171.522	24.587
	170.072	199.721		175.702	66.1642
	147.3	61.7333		160.618	47.5
	184.063	108.601		156.304	19.1739
	163.865	85.5946		153.793	39.931
	160.54	160.04		160.2	27.2
	188.506	143.207		152.138	35.2759
	152.2	41.5143		139.522	20.7826
	236.822	155.289		152.964	7.7143
	150.429	118		210.619	37.3872
	150.561	143.61		162.607	31.5179
	203.133	224.908		205.673	37.5403
	154.16	110.48		148.636	32.5758
	176.878	158.714		184.643	29.7738
	185.786	138.012		180.703	33.8378
	168.53	141.478		180.92	30.43
	167.468	103.306		154.754	22.2281
	168.258	110.806		165.238	19.0092
	171.095	186.649		162.753	26.2329
	146.136	147.477		166.958	26.125
	150.516	144.371		180.037	31.9625
	154.286	151.518		177.87	35.6522
	162.075	172.219		172.845	41.1553
	155.541	200.934		163.14	31.8
	137.154	109.615		169.057	33.4
	155.589	157.411		157.706	38.8529
	166.171	122.4		183.4	31.1143
	186.952	170.424		174.551	50.0435
	128.022	77.2444		149.276	18.5172
	142.767	139.933		185.812	39.3281
	137.84	106.56		159.9	30.35
	153.056	154.278		165.022	31.8696
	162.358	164.547		181.791	40.7455
	158.841	165.111		164.204	23.5185
	179.953	175.721		155.095	58.1429
	145.96	110.2		145.973	22.4595
	163.456	147.62		187.259	27.5345
	152.942	151.596		201.54	29.129
	185.82	193.126		144.172	52.0345
	146.4	122.52		170.524	19.3095
	145.5	163.083		174.391	48.7935
	157.418	167.582		182.139	46.1881
	135.083	143.708		134.03	29.2121
	171.75	136.6		146.833	23.875
	147.419	114.129		162.158	34.8421
	135.815	129.926		148.25	48.8269
	165.931	122.058		218.264	28.9286
	140.774	188.742		217.943	49.5447
	152.303	100.121		155.382	24
	148.509	187.415		177.259	22.1693
	134.844	147.375		178.766	35.4286
	140.846	112.115		190.714	32.875
	187.677	124.231		165.6	40.5714
	153.059	125		170.227	27.2614
	189.495	164.849		155.529	21.5588
	170.775	152.408		177.5	25.0833
	150.097	98.6129		149.323	11.7742
	175.5	151.517		156.41	50.6667
	150.543	170.571		159.875	20.375
	175.086	138.1		203.4	23.2462
	156.537	109.756		174.281	36.0625
	193.098	184.598		174.296	25.5556
	155.951	155.512		181.971	19.2609
	148.149	211.149		161.483	23
	157.844	167.078		149.355	68.6774
	167.272	165.605		177.429	56.0357
	140.111	72.8889		155.947	21.7368
	158.949	17.0678		155.226	30.8065
	140.143	112.595		171.206	51.5294
	136.88	157.68		153.216	52.5405
	156	127.838		137.412	17.0882
	154.882	124.618		148.686	46.8
	165.222	138.733		170.855	48.1711
	141.204	19.5		151.926	29.8148
	156.694	202.765		165.177	42.7941
	150.297	101.46		130.478	28.1304
	150.7	150.233		136	15.931
	149.625	121.583		149.636	27.1212
	159.167	140.619		151.967	33.1
	164.101	132.215		167.661	30.6786
	135.536	118.714		177.6	65.54
	170.362	177.604		145.652	37.8913
	180.254	159.857		164.806	62.1944
	148.875	187.896		173.173	68.4519
	142.148	115.444		142.518	43.6296
	199.715	146.181		157.962	36.7885
	182.579	143.132		163.488	28.7738
	169.821	171.791		147.3	47.9
	146.091	156.606		157.125	22.9821
	154.403	148.612		145.4	52.08
	143.077	134.962		133.567	27.7
	174.734	127.937		146.184	26.7368
	144.536	159.786		197.755	34.0258
	140.333	82.9		141.345	42.7586
	157.3	116.925		154.025	25.525
	218.757	8.2621		141.296	37.9259
	157.731	179.192		154.387	35.1935
	201.397	188.021		235.228	8.3533
	165.404	149.596		145.368	12.2368
	170.727	145.939		153.08	10.12
	136.345	156.828		134.719	28.4375
	146	154.333		148.953	86.3256
	151.208	110.583		146.471	9.1176
	182.008	179.164		172.775	5.9551
	150.375	107.375		159.253	35.7229
	143.606	126.091		145.359	6.3077
	144.512	6.8837		141.556	15.2963
	146.377	126.492		159.019	4.5472
	161.362	132.145		161.657	10.7429
	189.085	181.308		145.628	28.6047
	191.816	203.832		144.833	14.1667
	165	120.209		169.454	18.9318
	153.703	150.757		165.454	15.9773
	164.53	163.71		167.667	41.8551
	189.097	136.825		187.292	16.4583
	153.667	101.471		154.926	13.7037
	168.294	140.206		169.237	11.7368
	158.918	126.951		154.41	15.7436
	158.606	135.872		150.593	16.4815
	163.231	122.569		171.136	14.8136
	125.731	133.615		177.748	14.2613
	161.85	103.983		163.857	21
	148.145	138.091		135.08	10.76
	170.14	135.526		188.185	18.2778
	187.207	136.974		192.985	15.3382
	199.092	175.234		173.528	6.8333
	226.93	202.17		130.379	29
	210.617	129.102		170.516	10.8125
	135.29	52.0645		148.378	13.6757
	130.281	114.312		169.741	12.8765
	160.543	86.2		156.1	14.78
	176.484	173.855		203.716	36.9938
	175.93	114.535		146.912	11.2941
	161.903	75.5161		146.8	9.4
	220.5	208.676		148.513	2.641
	230.826	241.642		191.449	20.6232
	175.895	152.653		164.115	28.0769
	152.044	143.089		156.412	12.0294
	125.962	100.577		196.482	22.4101
	280.857	277.317		162.084	18.507
	174.667	125.519		161.939	24.0612
	167.682	184.727		147.194	20.0323
	142.423	90.5962		155.02	11.5
	183.088	172.288		159.387	20.9355
	149.882	14.4706		188.412	43.5
	234.721	188.776		170.536	24.9107
	184.506	98.8471		200.39	19.6714
	160.576	82.6667		181.609	15.8696
	164.406	88.4688		156.64	44.88
	242.861	197.239		173.37	15.4815
	190.132	126.882		181.106	34.3723
	233.359	229.565		168.488	13.9512
	177.75	162.721		153.454	14.0909
	241.127	178.244		232.558	38.5797
	211.006	164.799		205.797	28.0254
	180.402	119.189		149.292	23.1667
	153.908	82.1122		152.111	12.7778
	148.018	75.537		163.659	32.4545
	196.648	126.555		149.76	17.72
	246.286	205.859		167.4	11.42
	227.03	104.233		162.6	20.15
	149.936	99.8723		153.842	16.7719
	161.768	151.029		162.543	27.9783
	165.462	68.5769		180.156	33.6435
	170.936	105.705		139.667	25.25
	205.908	167.375		188.823	33.962
	158.547	117.245		181.34	32.7423
	217.556	186.496		153.79	35.6053
	157.833	90.1667		147.237	17.5789
	198.03	139.311		182.37	27.9877
	158.894	123.182		148.697	12.9091
	180.731	135.086		157.581	20.6047
	202.222	154.231		159.792	31.0833
	161.968	97.0968		181.437	24.0563
	157.462	106.128		165.798	40.519
	181.478	139.278		163.671	34.519
	186.629	147.75		168.135	22.9101
	217.337	164.179		170.048	26
	171.168	113.614		134.37	15.3333
	155.946	114.451		154.237	3.3684
	203.521	146.714		124.542	2.75
	142.222	92.5926		166.423	6.2308
	152.818	113.909		145.208	18.0417
	219.758	149.192		160.911	8.9556
	134.37	81.7778		157.655	5.3448
	181.456	94.6		190.377	4.4416
	137.887	95.2453		181.67	25.0777
	171.168	130.752		153.86	41.8
	244.876	263.608		202.309	40.1182
	197.288	133.151		173.964	7.5536
	169.676	80.6901		150.5	28.05
	171.729	118.254		158.239	26.413
	163.565	127.758		185.7	42.5167
	176.351	126.905		158.24	19
	171.059	108.471		142.167	10.5
	160.064	141.551		167.886	10.5455
	165.233	132.267		164.528	27.4167
	154.843	155.49		185.101	16.5963
	214.68	182.01		161	10.3793
	145.034	83.1561		163	35.1463
	225.843	116.744		158.154	43.5128
	143.484	139.194		170.257	37.0286
	158.83	81.9787		150.231	21.2115
	156.148	106.963		148.13	27.2174
	201.5	107.537		159.322	29.3898
	145.286	132.095		132.276	15.6552
	173.786	119.691		167.504	21.632
	220	112.545		152.897	42.6552
	141.217	102.783		172.388	14.4694
	147.708	119.958		155.333	10.3889
	151.581	76.6774		197.406	30.0312
	149.87	127.543		166.569	26.3846
	176.143	136.4		189.851	33.698
	143.12	65.72		183.375	15.9643
	202.085	81.1356		181.171	14.4878
	178.494	122.468		196.231	18.8462
	204.409	202.465		175.089	52.5357
	172.793	123.183		184.543	17.234
	169.944	103.663		189.2	17.7333
	204.831	137.381		155	30.9677
	189.72	130.417		200.521	17.7083
	149.371	92		177.146	16.875
	197.664	150.969		153.074	36.2222
	186.49	2.2941		180.433	16.9038
	196.63	116.963		156.482	18.3333
	163.787	143.197		135.902	12.5854
	234.78	224.996		178.066	25.3947
	279.004	161.029		168.792	20.5
	149.355	68.4839		195.056	24.0282
	204.307	98.3867		164.725	21.3768
	233.981	145.883		174.4	27.88
	183.652	120.413		165.954	20.1591
	165.45	111.525		157.035	16.6552
	163.805	112.878		167.385	17.3846
	152.286	89.4571		153.032	19.4839
	174.099	175.056		186.25	17.3214
	130.543	50.5714		175.5	36.2639
	152.194	126.583		164.569	18.0769
	163.192	126.346		146.5	14.5
	170.695	108		225.783	22.0465
	161.348	71.7826		171.679	17.4643
	163.224	147.741		200.255	18.6765
	164.094	142.781		189.467	17
	200.608	136.729		165.415	11
	211.892	121.667		192.233	44.7808
	166.413	92.2609		149	18.3913
	186.513	104.987		165.304	22.7391
	190.226	120.321		197.977	23.4884
	149.823	12.1765		137.154	13
	163.277	149.83		146.561	35.1951
	185.08	143.11		156.733	28.2333
	307.907	225.356		196.209	27.8209
	193.926	138.6		174.338	26.9577
	240.718	220.452		183.297	30.4189
	210.962	222.091		186.708	18.0625
	135.72	112.44		166.25	54.3056
	181.571	134.821		169.811	25.4906
	137.529	107.765		207.267	36.4052
	172.407	139.518		158.32	17.24
	190.503	180.652		176.377	7.9836
	148.667	138.667		190.633	27.1
	151.821	144.551		143.222	28.9444
	184.603	140.206		172.348	30.3478
	184.354	206.723		170.3	13.2
	180.322	134.793		162.323	20.3548
	144.667	83.3556		157.5	20
	191.585	200.385		183.303	24.7632
	163.708	164.077		191.823	25.098
	170.853	83.7467		164.217	10.6087
	150.793	90.8276		172.292	10.9583
	145.44	59.24		159.25	26.9375
	121.378	7.5946		153.212	12.3939
	150.944	4.6901		164.397	24.7534
	176.424	110.203		160.586	14.9655
	157.316	164.921		161.646	24.5
	171.867	114.8		162.739	21.7391
	185.333	170.367		159.35	13.3
	152.404	2.4737		175.431	31.0417
	145.558	108.884		171.524	24.3333
	157.755	128.612		160.25	15.0938
	185.231	119.231		183.172	29.3125
	187.902	4.3529		149.188	21.875
	169.565	168.891		159.4	24.92
	145.484	135.871		157.422	19.3594
	146.37	85.037		158.605	30.6842
	142.265	121.941		160.546	45.2045
	206.627	133.119		194.422	16.8778
	143.778	96		199.096	18.2096
	150.208	176.546		160.935	17.8696
	195.964	189.857		162.562	28.0833
	192.339	176.169		157.542	25.375
	163.867	108.55		159.286	25.8
	149.186	60.8372		164	20.2941
	172.255	113.84		206.405	23.2793
	158.256	110.897		167.819	26.9224
	170.721	203.582		175.317	20.3171
	156.636	114.515		201.368	28
	155.137	105.098		175.788	29.3077
	186.212	128.271		166.333	12.303
	141.081	93.7297		176.306	26.8871
	244.257	214.706		167.263	32.1689
	187.36	164.167		147.96	7.6
	181.119	96.1493		177.094	6.7925
	160.118	3.1176		148.758	14.8485
	171.682	134.5		177.034	32.7303
	168.026	124.377		208.328	30.9842
	147.121	114.151		177.983	24.75
	217.287	159.937		204.889	24.7654
	134.482	83.3704		161.192	33.2692
	245.017	239.415		165.273	21.8636
	130.731	94.3846		186.345	19.6547
	214.756	169.889		191.755	23.1429
	173.066	115.377		163.047	21.1163
	214.143	5.9351		168.829	18.3049
	141.821	92.4643		177.755	23.434
	147.553	147.71		172.675	19.1687
	141.75	40.5833		148	21.5
	191.461	183.255		177.867	25.5
	233.328	121.35		158.531	17.375
	215.228	155.719		166.204	29.6893
	130.067	57.3333		192	18.8481
	238.139	204.753		155.304	40.3571
	201.157	137.767		173.967	17.5333
	142.793	106.672		194.842	14.1053
	151.968	127.871		182.37	30.4815
	151.971	84.4118		158.805	13.3902
	157.441	118.823		220.195	24.4973
	163.957	132.435		219.693	29.545
	201.589	191		180.525	35.1
	144.361	78.1667		187.831	13.7042
	251.569	212.543		159.471	18.5294
	131.071	8.6071		166.314	10.3725
	162.036	103.891		164.87	31.8696
	263.874	10.3025		160.525	30.8525
	182.284	191.296		149.021	29.3404
	151.625	97.35		171.327	12.5962
	227.57	7.2025		163.108	27.1231
	219.679	198.466		156.03	15.9697
	166.957	103.814		165.784	55.0946
	186.512	142.159		153.397	42.3276
	188.606	151.78		185.019	45.8077
	153.976	112.095		168.22	34.2
	174.741	114.148		171.19	31
	139.074	69.2593		165.306	29.5323
	103.225	6.449		141.694	20.2222
	133.714	8.3095		196.866	33.5986
	181.835	137.342		145.026	15.7895
	199.182	194.773		167.762	17.5238
	145.059	92.6471		159.654	27
	183.02	102.541		146.828	13.5172
	163.81	117.671		139.923	25.6538
	209.75	156.279		144.269	18.9615
	166.558	90.1163		146.344	6.4375
	174.178	108.109		164.441	23.0414
	192.794	151.969		149	6.0233
	140.031	103.875		199.618	32.3636
	168.763	123.656		205.64	38.352
	141.654	80.6154		148.308	62.1538
	186.842	8.4561		174.96	21.0132
	167.535	117.058		169.575	30.234
	193.112	82.8163		181.544	55.1667
	185.174	144.57		154.462	33.2051
	149.25	95.6071		219.735	26.4503
	160.119	90.0238		199.253	50.82
	193.598	122.433		178.436	25.5523
	183.212	157.25		163.567	17.1333
	206.559	89.5294		167.395	21.5526
	145.667	67.6061		168.412	69.7647
	170.567	135.867		153.281	12.2812
	195.919	106.333		189.062	31.5859
	159.758	121.864		152	25.0976
	195.832	115.785		150.975	21.125
	194.126	132.897		201.14	52.21
	186.58	163.49		155.208	11.3333
	177	168.942		162.295	45.1639
	156.82	89.86		164.746	22.5714
	236.753	182.214		153.853	13
	171.6	82.1		179.318	25.9773
	207.55	162.831		153.756	28.8444
	163.333	149.444		169.522	20.403
	173.907	109.464		162.432	12.0541
	196.528	170.031		159.453	25.2656
	182.108	139.819		169.082	23
	157.974	132.282		170.492	22.8462
	162.765	87.0588		132.783	20
	162.381	134.833		169.015	36.8955
	173.194	108.761		189.346	30.7228
	176.058	129.103		129.839	13.5161
	201.243	189.769		170.875	34.3594
	180.606	159.394		192.594	14.4058
	154.648	115.352		175.667	28.8627
	136.5	83.9643		166.529	23.0147
	176.357	119.268		154.972	38.3056
	165.792	18.875		193.046	29.2143
	193.464	146.577		187.185	65.3077
	177.51	189.843		146.63	13.6296
	226.173	205.923		201.012	44.7024
	219.792	170.41		148.452	10.6774
	145.194	133.677		174.939	28.7576
	168.31	167.591		172.561	38.7561
	199.885	190.356		148.886	32.6571
	186.368	131.255		161.533	23.7778
	160.864	115.296		167.298	29.1053
	163.235	99.8529		198.942	27.5833
	195.185	158.944		173.246	47.8772
	156.892	107.595		197.214	63.3452
	163.206	143.323		195.871	26.1505
	180.127	134.702		174.049	50.0244
	196.239	191.863		168.236	24.7636
	172.319	143.875		162.369	57.5846
	150.929	109.571		186.882	23.0196
	164.068	146.159		185.876	38.6584
	192.551	187.859		185.281	70.5618
	191.4	163.651		187.282	21.0769
	200.558	170.098		148.515	49.2121
	173.069	129.609		161.51	7.8776
	152.185	94.4815		168.31	31.8966
	164.21	96.8947		189.366	21.3239
	168.098	113.244		162.896	24.7917
	242.072	219.292		205.892	18.4865
	170.905	153.964		166.043	22.3043
	164.057	89.0571		150.732	14.5854
	168.714	118.191		166.756	32.0641
	159.083	20.4722		163.6	25.375
	210.823	222.166		174.412	16.5882
	171.708	98.8958		164.216	22.4118
	197.75	166.8		148.31	39.1724
	202.95	129.13		205.013	25.2763
	197.211	158.914		148.046	16.75
	181.904	23.3462		181.483	31.0667
	215.975	198.115		175.37	31.0741
	196.118	200.265		200.895	19.2807
	159.7	110.567		163.057	42.0857
	180.343	165.757		147.065	51.4516
	192.673	156.191		179.961	45.6364
	167.708	30.7846		165.463	39.4259
	212.352	192.633		210.673	43.4744
	176.582	167.91		227.644	45.1977
	161.286	136.486		171.303	35.1818
	183.851	149.881		170.9	30.3
	159.314	105.823		179.96	9.38
	161.348	163.043		187.956	39.5882
	146.2	22.4857		173.515	23.8182
	183.557	210.361		163.625	32.05
	197.282	164.591		198.227	47.026
	152.893	4.75		183.735	16.5
	190.743	100.2		174.767	42.3721
	196.938	126.257		209.964	15.9182
	176.636	157.509		161.657	19.0137
	174.811	129.054		194.19	32.686
	154.308	3.6538		187.243	45.0291
	144.393	83.5357		225.914	19.2903
	216.766	185.333		175.373	37.1493
	203.569	153.698		184.783	18.5652
	157.771	103		213.025	20.0867
	148.615	136.077		165.442	29.907
	156.879	139.742		193.913	24.029
	149.72	101.52		200.833	30.9762
	168.423	169.31		164.736	36.7547
	181.422	11.9778		174.366	21.8169
	189.872	175.099		174.957	40.3696
	148.9	101.067		177.153	35.1017
	155.913	15.6522		193.406	33.4375
	145	9.3846		176.859	21.5625
	141.633	144.533		216.933	32.8444
	141.714	143.4		185.138	43.5517
	162.431	185.241		141.8	12.4333
	197.384	183.909		187.633	34.2
	199.042	171.842		186.842	47.8947
	193.064	143.231		153.097	25.4839
	218.575	181.388		175.191	36.6471
	163.517	99.6207		170.566	35.0755
	186.231	152.654		187.467	26.2333
	201.197	184.844		177.333	40.5833
	170.92	97.28		176.5	51.7321
	185.149	139.008		133.654	16.0769
	143.577	6.9231		213.176	42.2705
	176.06	182.746		175.25	35.3611
	272.488	16.8525		149.947	26.6053
	200.602	168.728		150.654	26.8077
	154.595	144.622		167.964	30.6071
	200.403	125.706		172.4	30.06
	178.62	153.718		170.275	20.475
	178.635	187.936		151.391	24.5435
	202.901	174		146.226	21.6129
	174.811	175.284		173.851	37.1064
	215.065	147.398		172.72	32.3867
	209.121	169.614		155.292	23.4583
	185.526	30.5789		140.556	25.0278
	181.25	101.025		157.526	18.5526
	177	158.28		163.104	29.7923
	151.744	123.051		145.133	20.6333
	165.98	164.286		209.93	35.4912
	168.292	161		225.444	37.0476
	180.291	132.291		178.684	22.9123
	194.183	176.038		199.184	21.4474
	166.333	168.714		152.859	27.7183
	156.889	231.889		187.397	31.6912
	176.783	16.7391		138.067	17.8333
	179.739	151.081		180.54	34.08
	187.807	136.773		274.607	59.66
	158.132	14.9811		172.452	39.8387
	191.972	115.042		169.577	46.8077
	193.516	156.893		177.917	11.75
	172.958	158.729		184.879	40.9394
	222.78	161.807		176.148	28.5185
	217.852	205.493		207.679	34.2738
	167.375	72.8125		219.985	50.3206
	172.745	116.489		170.387	38.3226
	176.585	131.66		181.702	35.2979
	167.583	116.646		172.552	37.8966
	187.386	125.855		140.407	24.963
	209.171	120.239		179.313	31.1642
	201.429	28.7551		144.622	29.9189
	190.641	74.0513		157.077	26.4615
	168.365	77.8824		176.193	32.8421
	170.259	59.3304		166.2	30.6286
	176.595	105.784		175.363	26.3
	176.433	71.6333		167.986	31.0143
	161.261	121.927		251.156	31.2938
	181.766	13.9574		169.303	27.6364
	180.82	137.96		171.454	44.2727
	168.317	81.5366		180.681	27.6809
	172.322	100.237		174.835	67.0165
	166.826	16.6957		196.604	29.2376
	143.548	25.6429		143.939	21.2424
	175.911	166.856		163.163	36.6327
	185.355	22.5161		151.812	35.4062
	151.348	96.5652		163.429	53
	186.171	108.114		163.954	7.3636
	161.465	17.0233		173.762	31.3492
	180.02	85.0816		166.576	42.303
	175.514	136.086		143.419	45.6129
	197.828	169.078		178.302	37.0603
	248.769	261.308		149.423	21
	171.56	81.36		172.75	29.5962
	192.828	138.793		164.125	12.375
	155.548	27.8493		159.4	25.3
	185.043	106.522		165.138	28.6897
	178.645	115.403		148.115	26.9231
	207.156	145.25		156.485	26.9697
	182.957	14.8696		171.39	29.7561
	171.972	97.7778		155.861	39.2222
	187.471	29.2549		186.982	35.6518
	176.933	22.1778		184.341	36.2614
	165.292	120.75		157.722	21.4722
	163.677	91.6471		178.776	37.8621
	171.34	109.981		162.667	27.3939
	171.625	128.589		176.41	34.8974
	198.317	138.317		133.675	22.775
	170.484	78.3226		185.541	44.4128
	184.75	104.784		173.954	30.1591
	184.528	109.458		161.571	27.6429
	148.868	80.4737		171.81	28.9524
	196.327	115.952		149.924	34.9242
	226.556	213.889		180.843	25.2771
	174.51	75.9216		181.689	23.4222
	188.458	110.881		157.149	22.4894
	161.463	192.474		164.076	49.4528
	183.315	83.7671		152.518	39.1481
	205.222	184.571		183.195	32.2073
	185.179	150.782		155.102	37.551
	185.076	211.611		196.731	39.2345
	180.634	140.537		146.148	20.6296
	155.474	79.6053		164.46	29.02
	236.216	235.633		156	28.814
	209.564	148.109		155.909	39.4545
	226.254	191.57		202.941	33.4314
	167.917	123.056		138.552	29.3448
	172.29	77.5		169	37.5238
	166.613	62.8533		168.476	33.2619
	174.183	151.13		182.85	41.5
	162.279	150.427		152.724	29.4483
	197.154	133.423		156.433	46.2
	160.214	131.893		152.478	3.4348
	196.6	94.38		182.977	14.8605
	181.718	204.153		214.947	19.7368
	173.071	130.476		172.724	33.7931
	182.354	134.701		174.5	14.4773
	176.688	129.016		161.932	22.9661
	185.193	95.8421		154.579	18.8158
	169.086	150.486		154.45	8.1
	167.609	84.1522		162.195	28.3171
	172	185.591		157.795	36.0256
	142.04	70.88		152.472	34.5
	191.894	101.17		173.875	24.6719
	220.244	115.058		151.478	19.6957
	144.52	127.56		234.596	57.4231
	154.406	143.281		147.035	28.069
	145.48	170.24		165.092	19.8026
	152.8	107.76		165.028	20.5833
	152.875	121.833		147.742	29.4194
	156.023	150.704		160.872	21.7949
	228.275	150.322		158.961	32.9216
	169.591	93.7727		150.538	44.6154
	200.23	137.115		165.345	35.6182
	199.727	216.891		154.875	40.875
	210.07	141.338		156.2	23.4667
	159.857	86.4857		155.073	23.4146
	201.138	112.538		174.258	57.433
	216.763	183.043		191.615	33.6458
	147.065	121.258		160.761	48.0652
	165.785	165.684		155.783	32.8261
	162.901	164.944		148.861	30.9167
	184.912	100.684		173.064	40.9574
	205.523	7.578		163.349	12.8485
	212.658	118.342		139.077	26.9231
	149.714	146.405		140.214	27.25
	179.681	136.788		143.548	37.4048
	171.83	132.851		152.071	83.9524
	154.292	75.4167		147.821	15.8929
	189.617	117.55		143.346	14.6923
	173.47	137.096		145.448	58.069
	159.656	120.312		143.913	26.8696
	147.636	152.333		160.645	72.6237
	160.797	92.4783		144.595	16.2162
	173.04	98.8		133.826	19.4348
	168.482	125.148		151.203	76.3649
	203.413	136.547		137.049	22.4146
	168.065	160.097		153.531	73.1975
	198.852	100.41		150.542	26.5833
	212.162	171.667		164.703	64.5676
	194	147.878		164.833	32.4697
	177.695	143.593		189.767	63.8167
	198.629	164.676		165.771	23.2169
	193.182	129.033		161.828	36.7241
	167.044	86.0882		157.806	31.4516
	216.635	180.406		181.441	55.2883
	167.76	115.84		170.968	17.5161
	180.279	104.326		168.879	17.7576
	197.105	157.041		197.893	35.381
	172.73	122.622		176.935	33.2903
	176.083	116.583		164.836	29.4545
	206.48	107.536		145.588	37.7059
	208.191	121.618		176.389	22.4722
	214.425	158.863		171.77	14.6322
	202.679	161.5		175.234	33.729
	166.861	180.194		136.652	41
	209.907	151.102		158.366	1.662
	153.646	86.5417		149.963	14.7037
	168.594	166.156		165.735	28.2941
	168.971	132.457		165.178	26.2329
	168.323	106.371		147.7	47.2
	187.466	108.925		169.603	34.3448
	178.132	121.162		154.906	37.9062
	167.323	164.226		153.478	27.9851
	173.644	117.389		156.074	5.9259
	162.837	82.2558		185.786	29.4524
	154.691	104		148.029	13.9429
	133.92	106.28		148.471	23.3235
	157.872	117.923		194.186	36.4186
	144.115	74.3077		151.949	20.4103
	141.4	106.543		144.87	13.2174
	183.425	135.723		164.778	13.9444
	211.728	133.975		154.946	20.6545
	143.167	123.786		150.125	34.4375
	174.705	114.103		151.316	6.7368
	165.515	89.9706		168.279	32.907
	210.312	142.55		165.821	36.9286
	176.478	82.8043		141.325	21.725
	194.151	124.279		144.633	44.4667
	136.143	93.3214		159.778	61.0778
	153	100.923		139.37	22.2593
	156.684	83.0263		162.915	54.7447
	246.645	163.914		160.036	26.9818
	153.196	87.6078		141.719	8.4375
	221.522	279.392		153.587	15.7174
	186.661	158.613		144.046	30.8864
	185.838	75.55		150.073	8.7073
	167.164	148.849		141.667	46.25
	236.164	145.252		165	72.0526
	194.198	35.9406		139.949	14.9487
	197.412	152.875		144.317	57.2683
	146.719	181.094		126.571	10.1071
	179.521	75.4583		145.25	40.8438
	154.92	82.24		141.933	47.2667
	175.037	48.6111		154.772	71.2025
	146.241	37.5517		166.664	82.8244
	208.389	173.853		186.76	70.5943
	153.46	77.76		166.558	37.3636
	180.125	180.734		153	61.4595
	147.32	121.44		142.958	37.8333
	153.208	84.3019		150.8	31.825
	172.054	23.4		146.12	38.64
	176.621	110.546		140.407	13.2222
	148.744	109		144.794	29.7647
	139.214	121.048		156.8	32.6667
	132.8	129.04		144.93	90.8947
	141.394	94.1818		159.258	42.8065
	159.571	145.974		139.585	45.5472
	132.057	82.6		180.028	36.0497
	153.321	148.089		128.407	16.7778
	139.375	4.55		178.891	69.3913
	171.143	120.188		142.136	31.8148
	168.054	121.441		151.75	11.4091
	160.156	140.289		146.75	32.05
	164.875	164.125		127.87	56.3043
	160.042	124.31		131.067	24.1333
	167.397	162.5		168.629	45.1571
	151.244	172.829		123.583	17.75
	144.188	157.281		132.971	16.0294
	143.448	77.9655		152.18	19.4098
	145.737	101.026		139.644	21.4667
	156.54	133.46		154.865	34.6622
	149.289	181		179.54	34.9195
	143.947	140.237		156.529	25.1471
	158.784	134.676		139.429	16.0357
	153.043	31.4348		138.154	13.5385
	152.643	127.833		142.613	21.3226
	172.329	134.398		130.161	46
	176.989	177.33		162.356	41.0667
	152.828	166.414		163.299	24.5401
	162.512	78.5366		133.68	11.32
	163.698	151.279		164.449	19.1633
	149.19	144.357		169.419	21.186
	175.145	151.522		173.897	31.7206
	157	91.8148		149.396	34.8868
	160.104	135.354		166.207	44.1341
	146.952	142.81		137.348	9.3043
	218.095	140.485		148.548	9.6429
	168.974	130.256		165.365	31.0635
	167.128	116.128		152.406	30.375
	166.963	83.1111		161.381	29.2619
	165.75	91.4286		141.515	28.6667
	169.171	89.7073		171.04	29.5526
	154.741	76.7407		170.963	15.6625
	150.412	101.059		149.286	35.5714
	161.407	83.3333		154.881	28.8333
	135.548	69.4516		134.177	57.3529
	175.2	149.573		142.932	21.5227
	206.472	135.6		169.218	26.9091
	177.019	82.1923		157.237	37.0789
	160.121	133.431		167.115	25.9231
	157.6	96.6571		174.164	19.9104
	165.605	77.5		176.143	9.1746
	168.9	133.1		177.343	23.2329
	179.882	69.1711		157.967	26.7
	171.636	102.546		214.035	46.2632
	152.346	117.654		160.406	31.0312
	198.821	101.457		184.294	13
	168.531	162.741		148.793	12.8276
	165.783	83.7739		182.404	13.6154
	173.032	93.7742		146.286	20.0857
	153.7	100.533		165.073	24.9268
	165.667	88.1905		182.724	29.5517
	184.645	102.533		160.186	4.5116
	163.546	68.2424		207.713	16.9259
	209.98	126.893		160.229	8.9167
	153.8	102.78		167.353	10.4941
	158.077	87.9615		170.646	21.1231
	137.222	100.056		151.436	19
	160.645	101.968		156.333	23.549
	162.491	74.2075		164.405	20.881
	161	127.203		194.458	26.1667
	161.643	108.286		149.25	23.8214
	160.105	78.4474		163.5	19.2115
	143.793	83.9655		151.977	38.6279
	154.027	76.0811		162.319	62.7876
	155.667	116.758		164.465	23.9655
	139.926	122.593		163.667	13.4286
	146.2	159.367		162.829	14.9714
	148.562	164.781		155.16	21.64
	183.11	130.404		163	21.56
	144.103	100.128		206.876	65.4286
	160.451	116.569		158.4	18.7714
	148.13	110.944		155.471	33.1176
	148.097	90.5161		205.452	20.4247
	148.463	89.4815		165.458	30.4167
	185.315	169.658		145.92	34.8
	177.967	91.7717		163.06	37
	169.906	114.962		158.907	5.7674
	166.069	145.973		185.088	22.5882
	142.12	73.44		199.029	31.2464
	164.103	115.448		153.783	7.8261
	155.979	149.234		167.471	22.8235
	190.932	193.909		142.308	15.641
	156.654	109.615		162.071	13.6786
	149.87	76.087		192.468	50.0275
	194.632	102.868		147.953	47.6047
	155.5	48.0333		136.256	4.2051
	170.05	108.383		149.844	47.0312
	197.287	155.512		155.4	21.9667
	184.827	113.173		148.976	16.0488
	194.409	155.225		188.597	28.4028
	151.436	136.949		140.8	56
	172.833	98.8889		166.6	18.42
	169.079	127.132		158.59	16.4359
	143.902	141.659		150.778	33.5185
	145.135	131.378		160.633	45.1
	167.167	152.646		136.905	13.8413
	177.111	138.759		217.964	37.4762
	186.608	108.367		150.423	29.0385
	165.808	110.493		119.533	5.5
	198.134	125.411		163.028	9.1389
	189.754	95.3279		173.036	22.4107
	175.019	89.6604		168.094	13.2188
	220.613	117.194		165.346	26.9423
	131.292	41.5833		217.664	33.976
	171.205	161.564		149.062	17.4062
	146.385	144.154		151.159	43.3415
	149.792	51.2917		155.903	26.3871
	145.077	113.923		216.364	28.4886
	184.57	89.7722		143.742	44.8387
	142.897	170.328		141.615	27.9487
	154.417	134.333		139.026	21.3421
	148.462	66.5		146.818	79.4242
	145	30.7805		210.802	40.7292
	137.482	86.037		145.625	35.1875
	142.37	63.6667		144.379	52
	153.863	90.5098		166.353	27.8039
	165	89.5111		184.368	45.3678
	172.986	118		147.704	78.5926
	146.19	126.405		142.111	29.7037
	154.667	121.5		239.481	68.1073
	162.225	110.75		142.656	36.0625
	180.05	158.6		153.281	62.3438
	177.843	179.09		134.97	60.2424
	144.24	100.08		174.047	33.4219
	184.969	154.918		146.464	49.8214
	138.969	86.75		150.152	44.1304
	166.685	114.685		153.708	42.4583
	145.156	117.75		215.321	50.6026
	143.24	57.16		141.694	114.944
	157.205	127.897		146.7	57.55
	190.22	168.823		157.897	27.5172
	152.614	92.3409		150.033	6.2
	153.217	92.4783		165.878	80.6341
	167.229	88.2571		165.78	21.2439
	141.035	94.2414		255.035	66.3333
	168.974	126.364		166.562	36.6042
	126.231	85.7308		155.103	11.1379
	138.13	135.261		184.817	9.2113
	162.525	136.115		195.474	14.0877
	176.581	124.355		170.22	10.2927
	177.5	126.353		154.942	6.9231
	148.433	126.967		188.677	11.8871
	191.512	101.325		193.162	72.9619
	155.66	136.04		216.23	56.2919
	176.444	169.556		182.603	19.1897
	160.951	110.439		159.2	49.4727
	176.121	152.697		157.047	39.7907
	146.767	102.667		139.56	30.08
	170.987	156.743		158.454	17.0909
	160.091	154.212		191.802	52.5198
	196.232	156.547		175.415	25.9512
	194.873	181.754		183.049	30.1475
	149.686	160.857		392.909	32
	163.25	182.938		174.298	56.7193
	158.244	76.2683		181.307	17.5733
	144.385	143.615		203.617	63
	139.647	89.6176		205.913	17.6232
	134.923	152.115		169.723	46.0638
	162.256	143.41		183.55	21.5667
	187.793	166.554		189.312	17.7969
	173.195	87.2069		181.62	48.32
	161.056	171.333		159.474	12.5263
	142.357	123.524		145.071	29.0357
	152.385	102.808		223.09	13.7658
	149.113	107.509		151.517	49.7586
	160.783	132.978		209.523	39.2045
	148.405	116.643		210.635	46.8118
	156.579	108.658		170.348	33.5652
	153.909	97.4909		162	15.2414
	154.195	153.883		189.667	11.8421
	198.434	120.38		203.372	11.7674
	199.844	165.59		158.935	16.4516
	180.747	121.722		196.474	19.5965
	152.708	74.7083		203.767	22.5
	165.387	70.0968		172.4	28.7667
	215.792	140.5		223	13.2435
	149.091	12.303		169.482	6.3704
	169.826	142.802		198	13.2545
	227.638	160.913		178.75	15.5119
	138.9	12.8333		194.053	15.5088
	144.611	100.352		189.29	44.9065
	159.774	123.161		193.529	11.4314
	166.892	86.0083		178	11.0746
	147.294	93.3137		177.512	18.3415
	136.036	56.6071		156.214	11.3571
	180.134	93.6119		172.647	16.6471
	210.158	144.605		157.114	79.4318
	199.176	119.931		184.63	17.7778
	150.632	135		157.847	14.6111
	217.159	176.862		181.654	22.4872
	175.855	91.747		186.748	13.4505
	150.31	76.931		165.8	70.31
	171.197	99.3333		169.182	5.2121
	150.21	93.4839		211.043	11.913
	145.852	56.4444		166.71	19
	143.04	54.76		183.682	16.7045
	150.556	70.6222		209.941	18.8235
	193.231	98.1667		172.943	19.9623
	163.068	102.614		211.913	13.1478
	179.283	130.604		213.96	16.3898
	220.286	83.9571		164.035	11.8621
	162.422	82.4222		190.157	73.2809
	170.458	90.6667		193.75	8.7679
	146.939	55.7273		280.5	32.5564
	135.757	72.9189		157.833	6.9583
	155.806	69.1389		188.114	10.4773
	185.053	66.3158		211.737	13.9507
	136.143	103.857		184.763	12.2368
	162.608	69.6863		138.37	54.7407
	185.5	100.534		170.697	12.3636
	189.391	167.938		189.145	14.9355
	153.929	91.9286		166.982	45.0351
	159.812	106.653		189.758	8.6923
	147.514	95.4857		172.488	10.5349
	154	77.102		175.841	10.5507
	196.293	154.836		224.356	22.4713
	205.549	149.678		272.946	26.0095
	174.988	96.593		184.079	59.7937
	155.84	89.82		165.5	61.6731
	182.184	18.1633		205.157	15.0241
	156.414	79.4828		151.767	41.4667
	147.032	72.2258		173.6	11.45
	160.888	112.966		172.156	61.1875
	147.138	31.1379		188.25	10.6364
	192.211	124.978		211.108	13.4865
	139.241	80.8966		157.212	32.9394
	167.167	100.722		166.815	17.3704
	158.476	111.54		184.268	44.4107
	166.528	129.278		198.933	19.7167
	155.903	109.917		182.197	18.9197
	145.769	19.4231		193.219	42
	147.8	85.3714		185.677	3.3529
	178.613	110.573		201.594	9.9375
	158.833	108.278		162.213	12.8125
	157.633	92.6833		206.62	24.7589
	175.063	95.0759		160.649	18
	191.052	90.5735		178.977	12.5909
	153.778	124.741		133.39	9.6585
	154.367	75.5833		179.531	19.2041
	176.511	84.9065		196.78	11.0488
	155.231	97.6154		215.715	15.1739
	157.888	52.9213		142.765	11.7647
	191.696	113.376		142.47	8.1818
	100.292	56.5417		181.19	16.1207
	195.163	136.088		171.854	23.2683
	142.879	55.069		188.167	10.3462
	157.885	44.1538		209.41	33.7949
	154.139	49.814		210.863	24.3359
	153.815	114.63		152.759	14.2414
	207.678	98.0083		177.697	13.9394
	145.333	153.424		184.933	8.0222
	179.767	147.078		205.903	16.1942
	164.073	49.3455		238.334	21.3096
	172.957	55.913		209.084	22.6479
	168.465	85.8605		184.029	9
	160.482	74		229.094	18.5529
	147.179	59.4286		172.125	11.8875
	159.286	131.057		174.424	18.8788
	150.046	81.5227		191.764	18.5972
	170.787	111.721		187.911	17.7778
	170.192	129.481		184.04	10.7733
	180.288	102.966		169.84	21
	207.264	158.319		174.698	16.0698
	161.837	120.93		190.678	12.9322
	179.179	67.4615		209.405	46.6612
	162.296	68.3182		200.725	20.8791
	142.043	70.5217		218.238	14.6125
	212.403	158.261		245.007	19.3568
	135.852	107.963		200.482	13.8214
	146.6	102.433		186.525	15.85
	137.958	107.25		150.323	13.3824
	172.329	168.546		196.735	16.5714
	172	124.935		209.206	16.2696
	168.214	120.194		165.2	8.88
	149.2	128.64		184.533	16.7333
	174.612	148.835		224.519	16.2932
	189.725	162.738		165.394	15.1818
	157.093	116.13		197.326	19.2826
	157	81.8103		171.083	24.75
	151.636	125.5		184.125	15.9286
	179.264	116.226		222.746	34.3433
	139.366	108.463		211.425	16.2212
	179.5	136.167		209.611	46.25
	167.563	150.479		185.208	14.375
	151	95.64		184.047	12.0698
	177.395	160.477		165.781	11.4062
	164.288	128.024		209.875	16.2812
	161.088	116.677		198.96	27.4868
	201.203	162.805		170.129	19.6129
	125.174	87.3043		226.098	24.623
	149.828	107.724		177.354	15.8958
	146.226	189.097		161.229	12.2
	148.87	100.174		163.286	10.9286
	145.321	43.6604		162.69	13.1034
	138.027	120.46		149.4	8.7333
	143.744	99.4615		173.917	16.6042
	149.231	79.7179		170.321	29
	140.605	63.8684		217.765	15.2
	148.68	85.72		229.792	17.4545
	143.739	168.348		178.395	15.1316
	183.52	112.453		189.979	19.0625
	179.394	150.313		176.324	12.0541
	171.561	120.017		155	19.4865
	155.513	95.7949		163.036	41.8909
	143.111	107.194		216.848	19.731
	153.145	119.348		155.459	8.8649
	161.365	113.54		179.489	21.7778
	147.696	115.429		162.761	44.8913
	155.868	147.943		149.346	56.0962
	167.987	87.5385		168.229	18.7143
	157.443	94.3544		190.485	45.8088
	164.119	78.8136		182.622	15.4054
	148.518	72.1667		173.31	14.0345
	151.452	154.323		179.7	20.55
	180.944	122.382		164.516	44.5625
	154.489	127.872		161.286	21.5357
	145.436	84.5385		209.928	22.8627
	207.858	154.955		156.2	17.7667
	151.135	119.757		181.9	17.78
	163.947	102.79		174.25	38.7321
	175.538	116.292		187.761	23.4444
	109.075	80.675		133.107	26.9643
	161.407	4.0556		194.405	22.7848
	176.143	79.0714		146.714	39.9143
	189.431	130.569		170	49.5
	218.052	159.763		195.349	35.066
	153.844	170.511		150.548	13.129
	149.569	144.039		152.391	10.5652
	172.682	167.303		159.68	32.32
	150.972	90.1667		163.625	15.625
	166.188	176.609		174.431	15.4923
	163.032	127.806		161.29	3.6579
	160.963	155.222		159.326	14.9767
	168.484	108.548		167.108	22.6216
	156.595	146.432		205.482	19.9375
	176.907	135.558		187.843	39.8313
	206.509	106.767		152.29	16.6579
	154.972	106.472		178.476	82.3301
	148.688	85.5938		170.865	36.2115
	173.397	108.621		164.246	26.8154
	187.075	50.7313		152.147	15.1471
	173.972	49.6111		185.901	47.4653
	151.346	117.923		191.46	14.746
	174.283	190.457		180.567	40.2979
	178.071	111.893		169.347	10.449
	196.823	138.073		205.444	35.321
	163.643	114.679		136.679	12.7857
	186.394	64.2424		211.454	37.7273
	183.424	154.121		173.772	12.4737
	135.266	87.2486		190.492	18.2857
	171.947	141.979		160.467	26.5778
	140.444	94.2963		185.102	16.9745
	126.963	39.1481		160.766	43.2553
	150.52	127.36		177.634	18.7761
	145.4	107.72		185.079	31.8889
	196.595	134.268		138.933	17
	184.793	156.276		176.378	40.4667
	182.61	118.512		185.81	52.73
	147	54.1538		157.167	39.25
	182.698	35.3488		165.769	17.1026
	152.265	88.1471		209.652	18.7321
	209.449	192.236		167.833	26.9375
	179.561	99		181.6	29.9692
	153.379	132.069		176.735	29.7353
	149.2	140.88		187.818	46.3333
	163.214	10.8571		145.9	25.7667
	183.267	124.167		174.118	36.1765
	139.5	30.8846		204.832	80.3871
	148.969	61.6562		152.675	11.45
	160.151	110.697		176.871	17.6235
	165.214	183.821		150.143	12.3214
	145.737	18.2368		196.429	25.6071
	179.707	149.276		147.478	12.087
	237.74	180.509		157.261	17.5217
	175.841	148.296		186.473	19.7818
	190.268	109.464		188.395	12.8289
	187.167	123.6		163.314	15.7429
	158.677	93.2059		179.978	27.5699
	185.575	158		169.34	43.1702
	193.236	114.055		151.296	20.2593
	192.784	137.27		163.826	26.0217
	182.95	170.23		170.758	15.7576
	167.912	127.562		181.786	12.3393
	181.27	72.254		169.375	22.9583
	174.53	139.217		187.937	24.6842
	151.333	75.6667		178.231	16.8718
	171.724	80.1034		172.212	21.0606
	163.429	134.506		195.32	26.1733
	182.579	103.947		185.843	17.6078
	165.614	107.886		193.022	20.8
	173.113	115.396		143.92	11.88
	172.88	142.36		168.548	10.2581
	180	164.575		195.329	16.7386
	175.533	135.1		165.128	60.1277
	179.661	117.136		209.855	21.3818
	146.5	57.7647		143.167	26.625
	179.022	162.622		155.571	9.0286
	208.635	173.418		176.526	43.5789
	152	55.6875		169.018	29.2963
	222	149.114		163.222	21.4074
	153.677	139		179.214	14.0238
	156.969	31.3594		185.16	20.04
	169	138.61		166.314	26.8286
	203.899	180.376		192.923	13.1395
	187.865	149.784		171.125	16.6875
	202.221	175.442		163.231	11.1026
	168.659	120.219		157.354	14.7292
	177.156	132.875		173.489	17.0667
	166.268	110.024		181.464	3.5422
	176.34	110.18		216.981	19.761
	155.667	111.074		174.659	4.5122
	220.458	188.399		187.277	14.4923
	206.614	153.675		195.151	26.2727
	165.179	119.897		157.586	33.1724
	176.457	145.743		150.895	14.2632
	174.458	143.583		169.04	12.48
	136.097	102.774		165.304	14.3913
	188.724	151.897		157.24	18.28
	183.839	148.419		158.694	7.2778
	173.767	128.512		146.656	9.875
	146.849	86.697		177.417	15.5
	176.119	93.6905		231.932	17.7273
	153.653	62.898		176.53	16.4242
	185.895	146.105		146.35	34.575
	155.706	151.735		207.967	24.6923
	157.083	134.25		179.2	14.2
	166.639	118.831		168.4	17.6286
	176.648	93.9074		146.37	20.2222
	187.856	118.154		178.05	31.7167
	182.469	155.122		127.879	7.3636
	156.875	101.525		143.92	20.28
	167.514	143.629		219.354	37.439
	160.342	158.342		182.396	15.5
	194.373	153.865		214.271	28.4167
	168.229	124.086		224.261	28.0746
	200.781	149.01		160.218	21.8545
	180.936	146.16		193.615	16.5962
	137.689	157.8		180.359	19.8205
	171.899	94.5758		160.242	9.5758
	172.04	101.72		181.193	15.5965
	163.778	147.206		184.357	15.75
	188.575	113.863		186.415	45.3692
	138.84	152.16		179.924	18.6415
	166.878	102.022		168.38	27.44
	152.5	7.1667		178.879	16.9091
	177.667	135.024		166.522	24.7826
	174.071	105.875		216.949	25.1772
	153.345	103.207		176.388	18.5918
	189.103	144.224		195.375	21.9833
	196.552	170.241		191.064	42.5745
	213.239	121.064		212.621	28.8211
	161.811	101.27		194.89	12.4412
	148.56	116.8		168.103	22
	203.226	164.473		161.177	15.8235
	139.739	92.913		187.093	16.537
	145.12	95		185.566	14.1313
	198.009	169.776		161.429	48.3429
	162.5	129.446		197.448	15.4828
	146.472	116.5		133.476	17.3095
	165.429	143.167		220.819	16.4966
	196.442	23.2468		157.949	14.2051
	200.164	123.411		228.071	33.1368
	160.6	117.514		187.397	19.1897
	174.067	127.044		188.035	14.5862
	189.073	135.221		169.383	23.8085
	158.073	167.829		139.94	10.14
	168.091	145.227		181.143	23.6735
	141.276	177.103		161.156	13.25
	176.276	119.184		167.038	19.9245
	148.56	122.48		169.987	25.8133
	174.179	156.952		159.964	10.3214
	186.745	133.909		154.833	15.3
	158.037	131.37		159.042	54.0833
	180.308	104.185		150.467	21.7
	235.163	9.1196		214.2	42.2
	196.344	181.556		183.938	26.2469
	166.6	115.429		205.365	18.5577
	185.664	183.639		191.879	33.3485
	176.008	180.076		178	24.3548
	208.387	59.629		177.048	29.9048
	161.454	104.125		172.774	47.5484
	163.333	135.548		189.884	23.1449
	128.482	99.6296		162.242	45.8182
	168.4	138.72		193.667	25.1505
	174.457	132.071		178.4	25.44
	150.32	56.76		187.97	28.2388
	146.353	111.618		152.579	19.1316
	194.877	137.849		182.169	26.9237
	172.857	119.13		203.567	25.1493
	116	8.6889		195.361	33.2771
	166.692	141		172.315	14.963
	203.082	154.315		222.133	26.1
	143.392	6.527		185.935	31.7532
	160.339	115.048		192.562	16.4375
	151.933	122.4		199.237	27.2544
	152.767	139.52		154.375	10.8438
	159.56	151.02		154.125	42.425
	142.976	102.786		180.463	22.4146
	188.155	132.682		159	22.3
	148.37	119.457		148.043	12.1304
	151.471	109.059		155.167	15.2083
	212.444	192.604		166.308	33.4615
	150.75	102.204		173.245	40.9592
	147.036	121.464		155.027	13.3514
	155.893	137.25		166.075	24.3
	149.793	109.207		169.719	54.0417
	157.17	115.745		165.917	58.7917
	162.302	85.8372		160.219	23.0729
	176.707	108.638		181.438	17.75
	170.61	142.171		163.022	20.1087
	194.705	168.605		227.62	62.02
	175.952	174.742		178.177	41.5806
	146.5	144.269		171.241	45.3889
	175.844	145.547		151.333	36.7778
	212.237	158.904		162.342	10.8947
	154.323	72.3235		166.561	42.8049
	151.281	82.3125		193.085	24.4434
	154.885	89.3462		170.988	28.425
	151.212	82.6667		173.909	36.0682
	174.078	110.02		153.556	17.7333
	206.291	161.715		151.783	8.8696
	163.205	12.8974		158.842	54.7895
	149.044	141.978		154.84	29.44
	205.954	152.546		168.14	20.32
	194.443	6.2143		157.844	14.5625
	175.021	165		148.435	30.4783
	198.008	94.9508		201.727	16.3333
	194.694	156.435		160.925	21.125
	158.015	167.985		166.68	16.46
	148.259	144.185		158.778	28.4762
	159.75	134.679		153.621	23.5517
	200.958	174.305		189.345	28.2414
	149.478	75.6522		135.609	17.1739
	140.433	97.9333		174	57.5
	212.474	161.922		159.333	24.4167
	174.915	31.5085		154.042	42.8333
	154.138	3.069		202.243	36.6214
	201.272	172.112		147.581	52.7442
	191.256	85.5732		183.508	20.9016
	140.043	130.174		161.141	19.0938
	167.365	150.554		161.171	25.6571
	171.797	143.058		160.68	51
	163.454	149.364		166.177	25.9706
	140.417	117.958		188.265	30.2771
	168.407	171.284		157.4	28.08
	166.298	151.351		188.228	24.6842
	174.693	156.011		166.425	45.1
	156.528	104.972		185.16	48.544
	147.512	142.047		169.926	23.0926
	139.872	55.4615		171.741	26.8824
	166.062	156		165.356	25.0444
	151.12	107.46		230.27	40.8559
	199.866	116.94		158.184	35.3947
	160.54	163.32		160.5	33.1667
	188.175	149.308		188.735	16.5455
	180.29	130.118		156.321	27.0377
[truncated: 3,078 more rows]

## Sheet: Panel F
	Panel F - Pooled distribution of relative Ab7a signal across compartments
	Plotted Data										Plotted Data					Statistical Analysis
	Dendrites			Soma			A.I.S.				Ab7a:27G2 ratio (averaged by neuron)
	27G2 intensity	Ab7a intensity		27G2 intensity	Ab7a intensity		27G2 intensity	Ab7a intensity			Dendrite	Soma	AIS			Repeated measures ANOVA summary
	1.03737	0.890191		1.50484	1.67226		0.623029	0.321992			1.11796	1.22302	0.721141			Assume sphericity?	No
	1.10705	1.12614		0.847054	0.722436		0.646446	0.450698			1.0681	1.04838	0.443543			F	174.1
	1.10854	1.06606		1.18092	1.254		0.768646	0.676876			1.16075	1.07188	0.400689			P value	<0,0001
	1.19314	1.17679		1.29986	1.40535		0.644704	0.308297			1.03577	1.34122	0.857355			P value summary	****
	1.01779	1.01804		0.809177	0.724269		1.5814	0.638565			0.987444	0.860096	0.461684			Statistically significant (P < 0.05)?	Yes
	1.13576	1.18753		0.995096	0.991002		1.42634	0.388575			0.745227	0.685131	0.503856			Geisser-Greenhouse's epsilon	0.7729
	0.923683	0.903984		1.35855	1.53737		1.29398	0.705499			0.960191	1.07701	0.433532			R square	0.7983
	0.760982	0.695266		0.946151	0.986274		0.882398	0.332884			0.996837	0.935978	0.634302
	1.34398	1.43694		1.09524	1.10886		1.78597	0.261612			0.925293	1.35553	0.505285			Was the matching effective?
	0.906634	0.908113		1.30913	1.55108		1.03541	0.43681			0.986293	0.848318	0.492848			F	2.191
	0.923656	1.08274		1.34172	1.53257		1.035	0.51555			1.02045	0.957879	0.657352			P value	0.0009
	0.749075	0.750859		1.265	1.48581		1.45184	0.746824			0.924795	0.814207	0.647427			P value summary	***
	0.792353	0.757339		1.34831	1.6537		1.1288	0.549426			0.827401	0.903824	0.501027			Is there significant matching (P < 0.05)?	Yes
	1.19574	1.17171		0.830605	0.770767		0.967728	0.646318			1.19499	1.07457	0.414987			R square	0.181
	1.31435	1.56038		0.810676	0.930347		1.08294	0.891195			1.0485	0.998668	0.57386
	1.42381	1.69872		1.31338	1.51607		1.13323	0.35514			0.891616	0.855984	0.488313			ANOVA table	SS	DF	MS	F (DFn, DFd)	P value
	1.01575	0.931137		1.19891	1.38618		0.850527	0.176551			0.784623	0.913577	0.441198			Treatment (between columns)	6.624	2	3.312	F (1,546, 68,01) = 174,1	P<0,0001
	1.35321	1.56254		1.20017	1.28233		0.80327	0.109602			0.869238	0.823355	0.417371			Individual (between rows)	1.834	44	0.04167	F (44, 88) = 2,191	P=0,0009
	0.952918	0.85955		1.02713	1.09623		0.939632	0.125828			1.13409	1.12194	0.536683			Residual (random)	1.674	88	0.01902
	1.06153	1.02051		1.1484	1.273		0.87303	0.132006			0.591073	0.450816	0.491123			Total	10.13	134
	1.4003	1.76353		1.21935	1.51257		0.2363	0.07582			1.00459	0.916254	0.407955
	0.942768	0.910816		1.28146	1.42648		0.529261	0.554882			0.907338	1.00082	0.804136			Data summary
	1.0755	1.36552		1.23923	1.49597		0.712747	0.969752			1.12618	0.979594	0.741843			Number of treatments (columns)	3
	1.10171	1.16299		1.14898	1.3563		0.348823	0.053311			0.919321	0.983676	0.301013			Number of subjects (rows)	45
	1.25804	1.59801		1.42483	1.65204		0.59103	0.545542			1.17936	1.17041	0.373708			Number of missing values	0
	0.898311	0.897155		1.0812	1.1903		1.1697	1.03119			1.18431	1.14382	0.419868
	0.995453	1.03373		1.41211	1.74814		1.10181	0.335721			1.04893	1.1522	0.458049			Number of families	1
	0.991191	0.739315		1.29353	1.47307		0.977542	0.468489			1.00499	0.962781	0.511335			Number of comparisons per family	3
	0.754619	0.188986		1.30092	1.44955		1.09443	0.35955			1.19758	1.1102	0.950741			Alpha	0.05
	0.848646	0.856992		0.81875	0.692486		1.16834	0.406343			1.15678	1.13002	0.624987
	1.02984	1.09451		0.801675	0.843971		0.97706	0.336513			0.928174	1.07594	0.362343			Uncorrected Fisher's LSD	Mean Diff,	95,00% CI of diff,	Significant?	Summary	Individual P Value
	0.965418	0.988794		0.861181	0.89371		0.966254	0.470559			0.836599	0.829316	0.665784			Dendrite vs. Soma	0.013	-0,02766 to 0,05367	No	ns	0.5227	A-B
	0.962175	1.11372		1.05538	1.23446		0.822082	0.911533			1.14367	1.15626	0.294168			Dendrite vs. AIS	0.4763	0,4142 to 0,5383	Yes	****	<0,0001	A-C
	0.908115	0.637272		0.696567	0.462987		0.798523	0.460796			1.01481	0.996827	0.541614			Soma vs. AIS	0.4633	0,3940 to 0,5325	Yes	****	<0,0001	B-C
	1.0356	1.07846		1.33868	1.49917		1.13369	1.2121			1.18556	1.25484	0.427069
	1.08381	1.06731		1.13933	0.615974		0.739724	0.615267			0.890544	0.897978	0.448983			Test details	Mean 1	Mean 2	Mean Diff,	SE of diff,	n1	n2	t	DF
	1.30489	1.65873		1.00536	0.547771		0.965924	0.278686			0.84812	0.984444	0.585435			Dendrite vs. Soma	1	0.987	0.013	0.02018	45	45	0.6444	44
	0.914946	1.02911		1.51518	1.73781		1.74612	0.443829			1.14467	0.916599	0.461938			Dendrite vs. AIS	1	0.5237	0.4763	0.0308	45	45	15.46	44
	0.875024	0.839009		1.0016	0.48319		0.905195	0.471792			0.843501	0.879418	0.492513			Soma vs. AIS	0.987	0.5237	0.4633	0.03436	45	45	13.48	44
	0.931878	1.10289		1.06938	0.997265		1.02981	0.721329			0.884397	0.438862	0.427724
	1.02116	0.638764		1.4295	1.64017		1.21384	0.616474			0.845434	0.791418	0.502197
	0.935722	1.0715		0.994506	1.02024		1.10821	0.717682			0.885117	0.916424	0.667581
	0.972829	1.07875		1.25747	1.67026		1.60537	0.65183			1.26195	1.21147	0.371182
	1.13337	1.44655		1.24411	1.17944		1.90904	0.49336			1.11268	1.08706	0.291293
	0.822321	0.936088		1.25404	1.3558		1.7765	0.308334			1.17477	1.06684	0.811123
	0.83864	0.421717		1.33072	1.62214		0.469785	0.381736
	0.969036	1.11677		1.19108	0.56312		1.20606	0.426129
	0.950579	0.519721		1.14146	0.809083		1.09831	0.393509
	0.90513	0.881294		1.47884	1.37145		1.33958	0.309234
	0.91261	0.54885		1.37272	1.45612		0.878856	0.60695
	0.956333	0.724522		1.17942	0.508055		1.12553	0.94167
	1.23003	1.47042		1.29348	1.26288		1.13448	0.743775
	1.02903	1.01862		1.49177	1.61285		1.01806	1.03025
	0.895818	0.866577		1.33889	1.38261		1.59704	0.880532
	0.853376	0.935861		1.06251	0.681681		0.910959	0.356817
	0.886578	0.774022		1.3751	1.30304		1.11158	0.557462
	0.880504	0.88367		1.33415	1.44925		1.15606	0.512227
	0.894721	0.813502		1.4883	1.38294		1.0526	0.545051
	0.980785	1.08657		1.24872	1.36675		1.10603	0.810026
	1.11457	1.20121		1.16681	1.04983		1.05449	0.665212
	1.08813	0.952156		1.13892	1.14543		1.0529	0.692949
	0.766875	0.570475		1.43597	1.722		0.844571	0.357962
	0.876823	0.755464		1.68739	1.94348		1.01382	0.380871
	0.940007	1.06767		1.37329	1.5754		0.91031	0.217708
	0.85458	0.499436		1.2203	1.46791		0.916505	0.385057
	0.82086	0.731289		1.26532	1.42335		0.929297	0.586361
	1.12556	1.35339		1.15061	1.30771		0.981227	0.392944
	0.74849	0.703747		1.16562	1.13169		0.792326	0.513791
	0.867569	0.952789		1.13992	1.08671		0.830306	0.445092
	0.944545	1.09253		1.22534	1.08155		1.07671	0.660426
	1.13985	1.29929		1.30066	1.47879		1.27311	0.916222
	1.18393	1.13067		1.30655	1.26545		0.902763	0.821892
	0.972877	1.00014		1.44009	1.23201		0.966325	0.657973
	1.30876	1.04355		1.32337	1.15464		0.959384	0.267955
	1.20695	1.30095		1.42797	1.41264		1.00358	0.372532
	0.932609	1.26107		1.39712	1.40355		0.770292	0.481336
	1.05759	1.07184		1.36216	1.39299		1.37146	1.43152
	0.941754	0.92569		1.31253	1.05915		1.20633	0.854366
	1.11017	1.06052		1.15822	0.996532		1.46789	0.566664
	0.904568	1.08148		1.3682	1.12355		1.20022	0.324435
	1.01476	0.8543		1.66549	1.39607		0.923123	0.482325
	0.991746	0.748113		1.52964	1.57531		1.21631	0.515336
	0.988078	0.987763		0.867107	0.593301		1.00697	0.983197
	1.00308	1.0183		1.42503	1.29246		1.301	0.341588
	1.06022	1.13753		1.44021	1.26643		1.22064	1.40017
	1.20424	1.46829		1.12978	1.19383		0.989946	0.186058
	1.07845	0.445038		1.39361	1.18358		1.16354	0.907618
	1.15224	1.10905		1.43974	1.44087		1.02101	0.843108
	1.01409	0.964809		1.14829	1.1682		0.978623	1.09006
	0.86864	0.975573		1.16389	1.24839		0.908145	1.09018
	0.963973	0.949484		0.852445	0.782375		0.920917	0.440283
	0.948601	0.746672		1.15527	1.1866		1.42632	0.170878
	1.10768	0.517193		1.3942	1.27333		1.20979	1.10005
	0.963395	1.11898		1.10088	1.05842		0.949653	1.12027
	0.900999	1.07611		1.41923	1.07897		1.64849	0.214543
	0.966434	1.16965		1.13073	1.06165		0.723408	0.626979
	0.971679	1.14127		1.35416	1.21774		1.62006	0.410762
	0.929905	0.985304		1.59703	1.47069		0.682883	0.380192
	0.852073	0.806405		1.49182	1.3458		0.831195	0.469445
	0.886542	0.83498		1.04697	0.850833		0.907465	0.910825
	0.79458	0.978615		1.24319	1.25398		1.04169	0.296958
	0.892468	0.653524		1.68774	1.6136		0.930816	0.140573
	0.874953	1.09253		1.56871	1.31084		1.26397	0.218015
	0.926474	1.09902		1.38669	1.38969		1.27119	0.302564
	0.99526	0.848488		1.61945	1.33829		1.31362	0.290529
	0.892	0.846865		1.43314	1.44148		1.15435	1.20033
	0.936953	1.08912		1.56648	1.67591		0.943794	0.105258
	0.952507	1.02595		1.17251	0.927344		0.891285	0.951987
	1.37375	1.59217		1.26017	1.2936		0.867524	0.132373
	1.12546	1.2493		1.45157	1.62545		0.85071	0.899043
	1.12072	1.12201		1.27184	1.58264		0.994725	0.92897
	1.11168	1.42677		1.24019	1.42428		1.23053	0.134299
	0.906238	0.670093		1.58651	1.98415		0.86211	0.16905
	0.893461	0.300822		1.64661	2.08329		1.27616	0.267098
	1.03078	1.10828		1.41476	1.75064		0.744515	0.169979
	0.940145	0.670471		1.37396	1.98068		0.74054	0.800825
	1.00194	0.794622		1.30105	1.49204		0.662944	0.072212
	0.97502	1.21467		1.39218	1.49607		1.17523	1.00426
	0.842411	0.882195		1.92636	2.32858		0.906763	0.114588
	0.926369	1.16245		1.3881	1.61526		1.48364	1.27265
	0.887072	0.869933		1.3341	1.59419		1.0193	0.522972
	1.06498	1.07472		1.28092	1.4787		1.08194	0.746247
	0.99951	0.608267		1.65135	1.90142		1.24277	0.804587
	1.09728	1.34378		1.457	1.74459		1.51954	0.578268
	0.832088	0.642178		1.34055	1.67516		1.00014	0.64855
	0.907286	0.826936		1.50533	1.80852		1.07041	0.980094
	1.0007	1.10893		1.40067	1.7151		0.723013	0.501068
	0.944163	1.10028		1.32889	1.63201		0.796424	0.954084
	0.958921	1.02968		1.44087	1.70247		1.3703	0.386501
	1.01294	1.09988		1.32691	1.6027		0.650959	0.07345
	0.957293	1.08173		1.43828	1.82609		1.05155	0.210147
	1.11479	1.32142		0.991796	0.847708		1.28081	0.197945
	0.840469	0.285887		1.50394	1.90695		1.6201	0.240065
	1.2288	1.53479		1.14424	1.23713		1.17311	0.541289
	0.890033	1.01637		1.162	1.38582		1.3842	0.501409
	0.922087	0.959578		1.19578	1.27943		1.10989	1.08429
	0.751073	0.334796		1.47131	1.46215		1.26514	0.316101
	0.792606	0.289404		1.11137	1.13357		1.16024	1.04597
	1.07634	1.2112		1.26016	1.19996		0.913315	0.124404
	1.10522	1.21622		1.15555	0.833025		1.04796	0.195631
	0.902047	0.957476		1.19399	0.991006		0.402187	0.280965
	0.788988	0.877723		1.39655	1.48176		0.156895	0.169724
	1.24337	1.54937		1.20206	1.19279		0.40426	0.242173
	0.999075	1.18921		1.40842	1.2416		0.246537	0.251844
	1.07697	1.42096		1.55551	1.42142		1.03381	0.514996
	0.943065	1.00765		1.44927	1.20602		1.0184	0.312145
	1.42174	1.86976		1.28008	1.16349		0.880161	0.745431
	0.745888	0.229093		1.11331	1.11764		0.819036	0.638361
	0.855282	0.28728		1.06679	0.528488		0.835527	0.702665
	0.784229	0.254657		1.17929	0.968955		1.14484	0.279693
	0.721281	0.607056		1.33538	0.936398		1.2338	0.616532
	1.21139	1.46656		1.38801	1.20332		1.1594	1.51896
	0.950317	0.355302		1.19993	1.22172		0.885961	1.10214
	1.14428	1.18466		1.06963	0.996936		0.900297	1.23752
	0.8775	0.751758		1.36383	1.04107		1.41001	0.911389
	1.26214	1.40288		1.0965	0.895883		1.05651	0.654341
	0.967032	0.992736		1.25702	1.26707		0.933876	0.627931
	0.860967	0.368269		1.25302	1.00175		0.913312	0.609899
	1.26986	1.48969		1.21224	0.982647		0.973258	0.101868
	1.06979	1.34087		1.03839	0.509705		1.10461	0.10734
	1.0203	0.91927		1.06624	1.0133		1.11612	1.11211
	0.934017	0.570413		1.17877	1.00883		1.35225	0.216789
	0.959757	0.962682		1.1466	0.891307		0.874497	0.338551
	0.849428	0.389139		1.37813	0.953059		0.66795	0.132562
	0.918343	0.526365		0.963439	1.10974		1.2831	0.131814
	0.970632	1.12591		0.875832	1.12604		1.09864	0.182304
	1.00751	1.09166		0.84057	0.581114		1.40075	0.293926
	1.22244	1.34289		1.34658	1.24911		0.790479	0.617715
	1.36959	1.60695		1.11939	1.03652		1.65031	0.474142
	1.23843	1.4506		1.34878	1.12401		1.23357	0.392856
	1.0556	1.2192		1.07536	0.794584		1.41538	0.771101
	0.884276	0.603598		1.28408	1.02662		1.09208	0.35151
	0.943561	1.36484		1.07725	1.03733		0.961442	0.34215
	0.959569	0.8585		1.39942	1.01985		1.15005	0.278274
	1.16554	1.21341		1.35795	1.1038		0.854455	0.287573
	1.03397	1.06978		1.10853	1.1318		1.26582	0.20473
	0.925263	0.931036		1.22481	1.09249		1.01628	0.092437
	0.998202	1.32998		1.11381	1.13564		1.33357	0.11643
	0.863496	0.684115		1.25468	1.03898		0.99186	0.067661
	1.08959	1.42317		1.11011	0.95501		1.04172	0.140336
	1.32163	1.64445		1.09569	0.976305		0.959081	0.46347
	0.911353	0.935593		1.09604	0.888214		1.24208	0.441888
	0.924903	0.93378		1.06834	0.932361		1.3112	0.521313
	1.00259	1.14044		1.27414	0.812373		1.10507	0.258702
	0.893694	1.10301		1.13606	0.695755		1.30956	1.19452
	0.891734	0.867732		1.24133	0.896689		1.0057	0.327016
	1.09025	1.32947		1.13374	1.04451		0.945749	0.28989
	1.33254	1.53799		1.63544	1.02601		1.05151	0.324597
	1.11911	1.22951		1.41851	1.32018		0.992855	0.822672
	1.31375	1.6794		1.23985	0.967658		1.25151	0.455716
	1.09833	1.05158		1.11859	0.921371		1.39425	1.07952
	1.03933	1.16949		1.17329	1.05545		1.11913	0.479815
	0.93412	0.857046		1.36622	0.957231		1.27918	0.804052
	0.943837	1.01517		1.21529	0.869076		0.975392	0.449919
	0.84583	0.676101		1.09951	0.586555		1.00258	0.953141
	0.946563	0.852734		1.1892	1.06165		1.43614	1.18266
	0.997922	1.57456		1.41718	1.09148		0.821399	0.35482
	0.818123	0.736963		1.31021	1.19636		0.873057	0.341008
	0.857267	0.695682		1.11802	0.430732		0.801164	0.306904
	0.969918	0.756171		1.32859	1.32031		1.01765	0.258943
	0.78484	0.605916		0.893694	1.10301		0.83421	0.434674
	0.864426	0.828935		0.891734	0.867732		0.718043	0.545764
	0.959976	0.910768		1.09025	1.32947		0.741492	0.666466
	1.05374	0.794036		1.33254	1.53799		1.43035	1.3699
	1.08018	1.20693		1.11911	1.22951		1.14055	1.09752
	0.992938	0.755214		1.31375	1.6794		0.918685	0.990324
	1.04844	1.33109		1.09833	1.05158		0.728641	0.510252
	1.29715	1.3616		1.03933	1.16949		0.943993	0.954056
	0.938339	1.13703		0.93412	0.857046		0.91951	1.07795
	0.939905	0.84069		0.943837	1.01517		1.09617	0.808825
	1.01707	1.11345		0.84583	0.676101		0.847474	0.708512
	1.02906	1		0.946563	0.852734		1.15101	0.786389
	1.20234	1.13867		0.997922	1.57456		1.55075	1.00175
	1.01269	0.991263		0.818123	0.736963		1.36401	0.75711
	1.07111	1.04481		0.857267	0.695682		0.972867	0.502759
	0.938475	0.853707		0.969918	0.756171		1.95334	0.292047
	0.982652	0.753224		0.78484	0.605916		1.62614	0.234891
	1.04255	0.937109		0.864426	0.828935		1.19415	0.430834
	1.20373	1.14991		0.959976	0.910768		1.48774	0.242569
	0.836813	0.83781		1.05374	0.794036		0.781473	0.455515
	0.846415	0.782175		1.08018	1.20693		0.741869	0.332464
	1.31528	1.63455		0.992938	0.755214		1.13985	0.367567
	0.990351	1.15214		1.04844	1.33109		0.779493	0.533283
	0.852896	0.680237		1.29715	1.3616		0.815684	0.131894
	0.880686	0.643234		0.938339	1.13703		1.04805	0.222912
	1.05125	0.985112		0.939905	0.84069		0.871603	0.935224
	0.755846	0.74072		1.01707	1.11345		1.01032	0.973773
	0.918528	0.657057		1.02906	1		1.3063	0.825456
	1.65846	2.30577		1.20234	1.13867		0.881243	0.30797
	1.0393	1.23391		1.01269	0.991263		1.09566	1.2069
	1.04182	0.89011		1.07111	1.04481		1.22366	0.94218
	0.877766	0.660007		0.938475	0.853707		1.02735	1.25535
	0.880568	0.872987		0.982652	0.753224		1.13431	0.614506
	0.904145	0.948321		1.04255	0.937109		1.04967	0.203847
	1.16759	1.29249		1.20373	1.14991		1.28904	0.21415
	1.00618	1.2846		0.836813	0.83781		1.25593	0.15999
	0.944528	0.996411		0.846415	0.782175		1.51856	0.967538
	1.11853	1.53521		1.31528	1.63455		1.35962	0.405728
	0.906957	0.703742		0.990351	1.15214		1.39315	0.858836
	0.939162	0.677119		0.852896	0.680237		1.33533	0.362788
	1.166	1.43754		0.880686	0.643234		1.35716	1.1517
	0.91521	0.673682		1.05125	0.985112		1.30866	0.448771
	0.927447	1.06074		0.755846	0.74072		1.2824	0.77033
	1.14157	1.31768		0.918528	0.657057		1.59051	1.00468
	0.896409	1.01676		1.24063	1.39126		1.24152	0.754266
	0.854563	0.675769		0.973185	1.01725		0.833888	0.509367
	1.11469	1.0337		1.08365	0.90861		0.887698	0.463685
	0.925617	1.17504		1.33562	1.43368		0.838017	0.417627
	0.952726	0.351067		1.02483	1.05584		0.871498	0.308848
	0.829649	0.976912		1.05297	1.20728		0.835734	0.26673
	0.807641	0.62802		1.09849	1.28148		0.862622	0.296045
	0.886035	1.14934		1.11881	1.12942		0.934267	0.285887
	1.28948	1.27423		1.17675	1.29315		0.739016	0.108055
	0.703334	0.633677		1.01791	1.1085		1.51209	0.311757
	1.05611	0.885227		1.21667	1.30707		0.814928	0.195899
	0.829624	0.441175		1.21533	1.47948		0.817393	0.110971
	0.996005	1.04376		1.08843	1.2722		1.16416	0.774988
	1.26189	1.08435		0.978954	1.00614		1.15095	0.441974
	0.960996	0.740648		1.12296	1.20276		1.15914	0.829775
	0.972456	1.09765		1.33621	1.56366		1.16155	0.295489
	0.836902	0.999057		1.08901	1.28196		0.890442	1.0522
	0.89199	0.882284		1.01032	1.11873		1.14326	0.346027
	0.78778	0.682185		1.06766	1.2942		1.13243	1.19477
	0.782854	0.877481		1.42951	1.96309		1.37471	0.327792
	0.900898	1.06725		1.16762	1.32098		0.86451	0.79134
	0.905246	0.968595		1.49354	1.28586		1.3914	0.465557
	0.769621	0.47679		1.18183	1.43887		0.729001	0.606882
	0.905902	1.09286		1.26689	1.82771		1.52097	0.315437
	0.93689	0.984973		1.27743	1.58007		1.40809	0.360469
	1.11514	1.45161		0.843604	0.283662		0.797856	0.234977
	0.781704	0.883711		1.11785	1.62175		0.997858	0.468069
	1.17532	1.11109		1.15789	1.33305		0.784243	0.579799
	0.897858	0.610209		0.916488	0.310695		0.912473	0.395353
	0.963479	0.722942		1.11042	1.67963		0.902805	0.242824
	1.02109	1.15188		0.901243	0.181853		0.801474	0.661597
	1.34078	1.50916		1.08504	1.44602		1.25019	0.963685
	1.03666	1.07722		1.13516	1.60266		1.1244	0.871642
	0.992009	0.668683		1.173	1.3359		1.27735	0.717564
	0.920025	1.00613		0.959237	0.913855		1.00603	0.59851
	0.912829	1.14538		1.33859	2.03516		1.36575	0.80738
	1.02856	0.955132		1.05554	1.26001		1.23244	0.877268
	1.34959	1.75573		1.20748	1.29944		1.13307	0.148633
	1.10622	1.4389		1.75022	2.3508		1.1943	0.433117
	1.11154	1.12408		1.13987	1.1888		1.13525	0.287005
	0.984306	0.970473		1.80032	1.93222		1.25822	0.462568
	1.00633	0.786032		1.9621	1.81385		1.41574	0.479255
	0.960401	0.828154		2.36386	1.63047		1.19545	1.30187
	1.29234	1.10554		1.71699	1.53553		0.789371	0.163948
	0.92916	0.504151		1.77578	1.66997		1.1859	0.380384
	0.92569	0.73591		1.96187	1.88221		1.17325	1.06599
	0.983176	0.843749		1.60425	1.54624		0.860037	0.786924
	1.3313	1.50875		1.58429	1.48235		2.65713	1.15787
	1.09139	1.17105		1.39879	1.55041		0.857339	0.80068
	1.15013	0.80919		1.8567	1.76757		0.942648	0.653744
	1.07738	0.921606		1.98884	1.88221		0.946854	0.687861
	1.24633	1.27732		1.47249	1.47415		0.966914	0.65211
	1.27695	1.28943		1.29246	1.31997		1.01163	0.644275
	1.15641	1.24989		1.79693	1.04958		0.87592	0.385035
	1.4209	1.91585		1.28691	1.29971		0.944554	0.498131
	0.94926	0.928241		1.30039	1.17445		0.908943	0.29839
	1.01289	1.14642		1.33422	0.307153		0.86336	0.275767
	1.17407	1.10665		1.31014	1.10615		0.85328	0.203908
	1.31706	1.3192		1.51743	1.47646		0.940371	0.202895
	0.99149	1.11684		1.58657	1.55589		1.46457	0.245438
	0.960029	0.776275		1.49099	1.23872		0.820796	0.15908
	1.08993	1.15866		2.01132	2.20203		1.01229	0.112322
	1.03752	1.02859		1.80056	1.62669		0.871938	0.116959
	0.85163	0.36716		1.53585	1.19514		0.871749	0.100185
	1.07036	1.41201		1.555	1.41612		0.963319	0.376038
	0.814154	0.582713		2.07014	1.89095		1.31704	0.263814
	0.908306	1.09441		1.50849	1.49977		1.17094	0.092205
	1.27036	0.84547		1.89831	1.70975		0.853959	0.287655
	0.811076	0.488684		1.15911	0.694427		0.942948	0.117804
	0.716751	0.628825		1.48448	1.36285		0.935314	0.116737
	0.754501	0.48696		1.58535	0.84938		0.956729	0.118979
	0.997486	1.23316		1.64842	0.348505		1.10109	0.124971
	0.945998	1.04194		1.30253	0.650545		0.781806	0.521408
	0.854346	0.909701		1.31897	1.18125		0.834269	0.345601
	0.981425	1.26152		1.17202	1.37078		1.12973	0.301562
	0.767484	0.778095		1.40364	1.19506		0.7347	0.065272
	0.805958	0.913589		1.298	1.1881		0.777979	0.188574
	0.838476	0.864854		1.16342	1.45596		0.787467	0.243335
	0.906892	0.941573		1.15267	1.19604		1.17664	0.649934
	0.756709	0.682267		1.44338	1.32023		1.31357	1.09318
	1.26368	1.46729		1.58792	1.78068		1.2387	0.73416
	0.8766	0.760822		1.43866	1.82589		1.83016	1.65967
	0.80993	1.11715		1.73527	2.05136		1.07939	0.940512
	1.03419	0.859809		1.32961	1.16353		1.3419	0.342942
	1.01961	0.824054		1.683	1.152
	0.955376	0.686548		1.25234	1.68363
	1.33572	1.43734		1.39037	1.36266
	0.978958	0.891201		1.61172	1.64827
	1.22025	1.84763		1.33077	1.39161
	0.759537	0.67481		1.45722	0.753502
	0.942855	0.876076		1.18684	1.58295
	0.955505	1.33834		2.05286	2.15452
	1.21494	1.12246		1.37094	1.52617
	0.765678	0.654972		0.985874	0.897067
	1.18754	1.3614		1.40003	1.52829
	1.08507	0.602079		1.64167	1.87806
	0.94877	0.798933		1.35708	1.4222
	1.28847	1.86665		1.46106	1.37943
	1.08548	0.944891		1.46134	1.66635
	0.920988	0.794832		1.44776	1.53287
	1.17267	0.943381		1.63485	1.58964
	1.03607	0.90819		1.70284	1.87972
	0.788131	0.391875		1.05003	0.604097
	0.864764	1.02344		1.13147	1.16563
	0.800821	0.494633		1.31927	1.18172
	0.865048	1.32428		1.521	1.57668
	1.11432	1.49362		1.49651	1.42468
	1.04329	0.908859		1.50808	1.56553
	1.00041	1.47239		1.32309	1.11584
	1.11643	1.04871		1.42269	1.11635
	0.911911	0.601944		1.19258	1.0071
	1.04564	1.02296		1.0823	1.49659
	0.883042	0.524048		1.18277	1.60312
	1.02575	1.46223		1.58421	2.41057
	1.12305	1.47461		1.32502	1.77905
	0.850951	0.53682		1.74588	2.68334
	0.848827	0.668848		1.38454	2.03087
	1.37525	1.44017		1.18062	1.70248
	1.28851	1.53601		1.06605	1.10983
	0.950162	0.593511		1.34622	2.06086
	1.02298	0.73182		1.50928	2.23986
	0.927973	0.587288		1.26001	1.92945
	0.85975	0.537747		1.23654	1.97071
	1.03415	0.778561		1.22188	1.80922
	0.848215	0.668083		1.52237	2.21564
	1.07896	1.14739		1.3368	1.67974
	0.764108	0.461207		1.31462	2.09929
	1.16952	1.22625		1.2377	1.76392
	1.10198	1.34727		1.10202	1.12589
	0.993501	0.941808		1.36563	2.02093
	0.755762	0.568537		1.12394	1.52754
	1.07405	1.22419		1.6361	2.29691
	1.03251	1.24235		1.15901	1.74139
	0.820468	0.505853		1.38422	2.07922
	1.0278	1.17605		1.168	2.03858
	0.858818	0.667739		1.32456	2.11975
	0.794009	0.843043		1.04736	1.53582
	0.93829	0.656215		1.37347	2.01517
	0.905926	0.265889		1.30097	2.04791
	1.15146	1.37765		1.20595	1.58876
	0.97546	1.07984		0.916902	0.87415
	0.987615	0.9729		1.2545	2.01892
	1.14309	1.41257		1.31684	1.824
	1.14331	1.27862		1.20695	1.78009
	1.01631	1.06538		1.11516	1.55847
	1.12532	1.28437		1.21444	2.12791
	1.14632	1.36727		1.11548	1.73639
	0.978709	1.13733		1.14218	1.68342
	1.00185	1.22825		1.39563	2.1731
	1.26309	0.973479		1.20864	1.34725
	0.875646	0.709624		1.3543	1.673
	1.10189	1.40596		0.95355	1.56303
	1.05856	1.28642		1.33861	2.28141
	0.924807	1.05233		1.10983	1.48429
	0.988782	1.25706		1.3408	1.96228
	1.01578	1.1068		1.17909	1.8528
	0.929125	1.14271		1.3928	2.01871
	0.786926	0.555596		1.0672	1.48738
	0.593586	0.349107		1.21917	1.86394
	1.14025	1.49227		1.32397	1.86681
	0.834145	0.924074		1.71588	2.59302
	1.19529	1.3934		1.12313	1.67853
	0.966871	0.63366		1.33665	1.91415
	0.855096	0.616313		1.64795	2.52868
	1.2092	1.08789		0.975994	1.11931
	1.23724	1.33411		1.28561	1.96468
	1.36936	1.43214		1.31367	2.13332
	0.883212	0.740717		1.42126	1.83185
	0.91816	0.727775		1.26889	1.92542
	0.826921	0.860587		1.05002	1.38778
	1.23442	1.32949		1.18103	1.61514
	0.987761	0.787011		1.20833	1.97582
	0.928211	0.753605		1.21737	1.61051
	1.12852	1.27703		1.21731	1.88707
	0.863331	0.982762		1.16729	1.74046
	0.816105	0.617409		1.26636	1.70393
	0.915851	1.00361		1.12006	1.74061
	0.900287	0.782433		1.11264	1.56482
	1.05664	1.2008		1.35064	1.92026
	0.80806	0.650833		1.17277	1.41389
	0.79821	1.05089		1.16852	0.787459
	1.00795	1.08992		1.15749	0.840589
	1.06822	1.3244		1.16483	0.72055
	1.00047	1.01056		1.27216	0.834255
	0.771858	0.956208		1.20127	0.978247
	0.924914	0.992882		1.2234	0.929831
	0.922051	0.861		1.17584	1.01243
	0.976089	0.617608		1.78169	1.45576
	0.975303	0.682097		1.23941	0.757418
	1.32765	1.60331		1.42862	1.38056
	1.09315	1.18711		1.40471	1.25903
	1.20459	1.34649		1.32928	1.02218
	1.08478	1.2038		1.31354	1.054
	1.11952	1.37086		1.40096	1.19414
	1.03261	1.05384		1.40328	0.967011
	0.888904	0.764055		1.38278	0.94557
	0.887883	0.833637		1.33062	1.19091
	1.11219	1.23551		1.26765	1.30444
	0.739083	0.620708		1.56962	1.09799
	1.21664	1.33629		1.39795	0.725281
	1.13068	1.35172		1.30716	1.43411
	0.955051	0.835231		1.32743	1.12189
	0.856948	0.853719		1.25904	0.833394
	0.965288	1.13131		1.32235	1.27157
	0.933667	1.25496		1.44302	1.25281
	0.995008	0.830787		1.44528	1.42876
	1.37832	1.53921		1.29669	1.51229
	1.04352	1.03856		1.47613	1.62843
	1.39208	1.42016		1.03952	0.560153
	0.98282	1.10024		1.39152	1.25747
	0.9866	0.551773		1.63929	1.38622
	0.956001	0.616204		1.48376	1.55158
	1.0394	1.16034		1.1842	0.75946
	1.04725	1.06943		1.47023	1.16042
	1.03347	1.21176		1.26096	0.961645
	0.983421	0.97617		1.10091	0.879912
	1.16238	0.925849		1.43393	0.907035
	1.11845	1.01791		1.11107	1.36444
	1.06708	1.21759		1.31331	1.24535
	1.0939	0.593574		1.30787	0.695264
	0.957063	1.04642		1.26184	0.876795
	0.952861	0.64456		1.65762	1.62846
	1.00203	0.656028		1.28123	0.979948
	0.936447	0.760993		1.33615	1.40873
	1.29035	1.42999		1.12781	0.82212
	0.950875	0.480738		1.49458	1.27536
	1.22765	1.21861		1.31875	1.28193
	1.01851	0.720757		1.05741	0.760679
	0.941975	1.25545		1.00545	1.10151
	1.01487	0.684506		1.29577	0.94228
	1.19229	1.26237		1.27832	0.803058
	0.974291	1.28878		1.24272	0.765651
	1.02783	1.23158		1.21118	1.15575
	0.995029	0.479941		1.4588	1.39034
	1.18162	1.30346		1.01206	1.12564
	1.079	0.519924		1.24972	1.18165
	1.35953	1.18185		1.20314	1.09345
	1.09861	1.22359		1.5131	1.41497
	1.17203	0.604296		1.50429	1.21441
	1.06262	0.590042		1.25722	0.796208
	1.22941	0.759005		1.35861	1.3036
	1.06499	0.611473		1.22235	1.28051
	0.828284	0.86011		1.0648	1.21918
	0.928742	1.41837		1.28075	1.15498
	0.877309	1.13565		1.33918	1.27154
	0.948621	1.04342		1.14466	0.117225
	0.917258	0.602074		1.71053	1.26156
	0.968338	1.14674		1.24127	1.35253
	0.812728	1.16072		1.3556	1.02716
	0.840416	0.902695		1.54576	0.961431
	0.87806	0.636785		1.4068	1.04444
	0.807954	1.11797		1.17494	1.1326
	0.816201	0.4054		1.15932	1.57043
	0.99709	1.23741		1.34612	1.08883
	0.779546	0.871206		1.5109	1.21177
	0.99791	1.07014		1.45514	1.35618
	1.07374	0.784537		1.51419	1.21681
	1.20307	1.49753		1.42562	1.14783
	0.992671	0.817659		1.50083	1.23224
	0.842809	0.692016		1.49957	1.34357
	0.799263	0.455284		1.53541	1.01227
	0.897148	0.73446		1.37182	1.42897
	0.976008	0.775853		1.43748	1.20836
	0.983069	1.14962		1.31752	1.41867
	0.933695	0.574025		1.50832	1.54349
	0.839862	0.739762		1.18915	0.86426
	0.882715	0.760993		1.33221	1.1543
	0.953537	1.18641		1.74476	1.95204
	0.924218	1.04815		1.29279	1.42403
	1.00565	1.22087		1.32288	1.49463
	1.45209	1.60802		1.35111	1.27408
	0.857394	1.15833		1.31357	1.21807
	0.86386	1.12706		1.63508	1.74802
	0.779524	0.984814		1.90449	2.03187
	0.964314	1.26845		1.80249	1.94663
	1.03563	1.33825		1.05946	0.920109
	0.899476	1.01763		1.1706	1.29643
	1.18139	1.28501		1.51949	1.62968
	1.00301	1.36984		1.2284	0.806025
	1.26706	1.73471		1.47213	1.45813
	0.944754	1.05998		1.19835	1.30893
	0.944969	1.20304		1.23254	1.30265
	0.86372	0.785135		1.07702	0.913495
	1.15703	1.33569		1.18213	0.712321
	0.935526	1.03182		1.35844	1.15799
	0.918493	1.22162		1.04324	0.572543
	0.751984	0.551064		1.14888	0.236641
	0.818293	1.01586		1.05965	1.18726
	0.769583	0.946431		1.12144	1.39318
	0.977451	1.30122		1.09633	1.14497
	1.25755	1.37439		1.17499	1.08297
	0.856753	0.726108		1.06045	0.873318
	1.07496	1.23013		1.40491	1.21091
	0.804206	0.68669		0.98846	0.675582
	0.921428	1.3076		1.65376	1.92329
	1.09013	1.22152		0.966871	0.399568
	0.919379	0.702169		1.16138	1.4944
	1.03533	1.39391		0.844432	0.505857
	0.960132	1.28357		1.11376	1.23102
	0.76166	0.709425		1.39148	1.63533
	1.08654	1.1315		1.43546	1.2889
	0.891737	0.751058		1.33653	1.43301
	1.06679	1.19134		1.09659	1.14192
	0.885845	0.672164		1.28388	1.2614
	0.985727	0.960781		1.05455	1.01205
	0.826892	0.647252		1.25746	0.964423
	1.21133	1.41001		1.03839	0.613524
	0.818541	0.581492		1.07854	1.11722
	0.886207	0.677337		1.37644	1.42835
	0.980467	0.582553		1.07154	0.712034
	0.877992	0.826289		1.46037	1.55151
	0.913819	0.905063		1.726	1.7218
	1.06665	1.30707		1.23362	0.567117
	0.854101	0.71762		1.40287	1.23374
	0.960594	0.962514		1.09461	0.924437
	0.930437	0.83253		1.23262	1.11319
	0.952442	1.01093		1.0568	0.961475
	0.921122	0.491972		0.892492	0.753121
	0.820075	0.655963		0.877431	0.647943
	0.805939	0.564506		1.05271	0.85671
	0.948774	0.717084		1.32508	1.25924
	0.901354	0.755303		1.29828	1.69206
	0.851806	0.68855		1.21218	0.870912
	0.854117	0.665949		1.23149	0.866707
	0.871574	0.718335		1.1808	1.6036
	0.897104	0.425745		1.13913	1.08877
	1.21273	1.39611		1.00339	0.708394
	0.873647	0.774265		1.0125	0.933377
	1.09995	1.08643		0.96179	0.936876
	0.900584	1.00749		1.05161	1.16672
	0.81655	0.847635		1.04872	0.880703
	0.908799	0.705194		1.13281	0.795481
	1.06544	1.36996		0.862644	1.27201
	1.0529	0.789341		1.19705	0.72587
	0.998138	0.940557		0.98514	0.74
	1.67378	2.06271		0.759806	0.982468
	1.00043	0.929118		0.888923	0.555146
	1.10816	1.16106		1.18317	0.836343
	1.13663	1.36334		0.777346	1.0848
	0.975547	0.898795		1.22316	0.880155
	0.997974	0.905836		1.13468	0.597248
	0.950315	0.9461		1.11304	1.03881
	0.851293	0.811543		0.936435	0.548641
	0.999692	1.22498		1.23303	0.755267
	1.22738	1.45382		1.05797	0.931218
	0.938205	0.847031		1.09998	1.16452
	0.931333	1.20861		1.13253	1.00166
	0.948246	1.00533		1.03539	1.57142
	1.42536	1.81921		1.17616	0.783954
	1.13869	1.49413		1.03835	0.811039
	0.951693	1.20496		1.06727	0.778487
	0.971696	0.794987		1.36024	1.11539
	1.12895	1.59946		0.897241	0.612993
	1.38336	1.92574		0.918897	0.581304
	1.39113	1.75284		0.895347	0.791341
	1.12831	1.22669		0.949757	0.749747
	1.00421	0.987564		0.994452	1.32645
	0.979233	0.89884		0.86671	0.788085
	1.21817	1.35762		0.816064	0.875111
	0.643669	0.719194		0.943452	0.866108
	1.01626	0.897148		1.05772	0.874954
	0.856437	0.752017		1.05183	0.8605
	1.23782	1.41515		1.52334	1.84305
	0.875979	0.936421		1.25265	1.41028
	0.889872	0.925672		1.34347	1.57438
	1.27515	1.39182		1.39131	1.58965
	0.723054	0.791887		1.22984	1.4789
	1.29075	1.2556		1.38711	1.62469
	0.925877	0.697444		1.29712	1.6003
	0.773664	0.72068		1.40562	1.75457
	0.784873	0.507786		1.52325	1.57609
	1.25063	1.3226		1.06129	1.43492
	0.86037	0.755283		1.16791	1.51675
	1.05797	0.977485		1.05171	1.53879
	0.898033	0.903964		1.15416	0.88016
	1.06471	1.09461		1.35496	1.47532
	0.760959	0.757861		1.62539	1.91999
	1.16155	1.33814		1.2354	0.966667
	1.31699	1.33648		1.02964	1.2402
	0.99782	0.959892		1.45235	1.75503
	0.809756	0.903043		1.34087	1.26563
	1.16726	1.11839		1.29522	1.17554
	0.797291	0.766934		1.24982	1.02995
	0.998676	1.1508		1.37261	1.57722
	0.968721	0.839833		1.34092	1.69793
	1.23379	1.24027		1.36509	1.70711
	0.946612	0.954622		1.34125	1.23425
	0.890877	0.961343		1.35014	1.7424
	1.21894	1.32546		1.37887	1.57312
	0.937611	0.937272		1.75116	0.339411
	0.904904	0.942931		1.31211	1.26277
	1.07064	1.24743		1.70233	1.86522
	1.31455	1.25239		1.03588	0.987623
	0.984376	1.02614		1.42527	1.6607
	0.875389	0.518387		1.64335	1.84724
	0.929689	0.747522		1.36263	1.76586
	1.12041	1.20906		1.78304	2.11215
	1.00551	1.17393		1.01662	0.501959
	0.968556	0.870766		0.936525	1.57053
	1.24219	1.42936		1.01122	1.1663
	1.06502	1.10092		1.34619	1.17507
	0.979115	1.07801		1.00956	1.10203
	0.876745	0.825025		1.11044	1.06786
	1.13929	1.13881		1.59083	1.95878
	0.958737	0.938756		1.19359	1.26471
	0.910678	0.810386		1.29243	0.98481
	1.30445	1.47842		1.70464	0.780908
	0.856456	0.870199		1.66805	1.87946
	0.854654	0.841355		1.64035	1.72995
	0.831154	0.739866		1.62132	2.15128
	1.06971	1.09993		1.12866	1.27117
	1.07099	1.31415		1.38125	1.71452
	1.28118	1.31694		1.52282	1.90024
	0.83736	0.89866		1.2844	0.997853
	0.806806	0.916946		1.25562	1.05054
	1.0427	1.13177		1.21266	1.53478
	0.897313	0.945194		1.42083	1.75544
	1.05405	1.15257		1.53342	1.88929
	0.82439	0.536266		0.901953	0.598029
	1.26301	1.32372		0.985126	0.904993
	0.992845	1.18844		1.19097	1.04419
	0.98252	0.712228		0.833649	0.898317
	0.894275	0.628753		1.39766	1.44815
	1.12353	1.04745		1.1679	1.17649
	0.81668	0.534604		1.49386	1.34826
	1.44422	1.33863		1.58781	1.67877
	1.44555	1.61194		1.28975	1.04676
	0.982958	1.11591		1.49281	1.38671
	1.04262	0.87879		1.3441	1.14337
	1.11671	1.13836		1.54574	1.49971
	1.10168	1.12583		1.18391	1.19574
	0.931706	1.01827		1.28906	1.27022
	1.16954	1.17788		1.14686	0.994808
	1.13421	1.2647		1.32051	0.970823
	0.847035	0.800951		1.37061	1.36323
	1.05443	1.01023		1.22069	1.11784
	1.07221	1.15853		1.06104	1.35292
	1.26477	1.47117		1.22747	1.1279
	0.787533	0.694978		1.63733	1.52627
	0.826644	0.755388		1.30152	1.18358
	0.971981	0.93609		1.30413	1.22878
	0.840278	0.663568		0.965503	0.590203
	1.18955	1.27321		0.91922	0.916061
	0.880222	1.13351		1.02558	0.714554
	0.927539	0.926023		1.29483	1.29008
	0.999446	1.10752		0.886117	0.856846
	1.05411	0.904166		0.931086	0.589938
	0.937106	1.07504		1.10498	0.989717
	0.859286	1.00188		1.17748	0.884068
	0.793366	0.802719		1.20982	1.02846
	0.958765	0.893035		1.02589	1.07483
	0.852536	0.882774		1.63305	1.59391
	1.01294	0.852573		1.31971	0.987221
	1.31714	1.49477		1.5347	1.48244
	0.826618	0.63498		1.27386	1.08459
	1.09226	1.34867		1.1563	0.99441
	0.965457	0.801827		1.00949	0.517614
	1.05949	1.30025		1.50067	1.40193
	0.818367	0.814619		1.39273	1.43663
	0.95658	0.733905		1.34755	1.60183
	0.819479	0.776755		1.47372	0.820378
	1.25415	1.40501		1.5212	1.36236
	0.853987	0.800626		1.2408	1.15428
	1.01391	1.27672		1.60556	1.44291
	0.82144	0.790176		1.32015	1.23962
	0.889985	0.663805		1.05764	0.751928
	1.02937	1.04605		1.34075	1.13105
	0.7424	0.451379		1.56609	1.5061
	0.951224	1.14756		1.44126	1.40247
	0.97357	1.10191		1.3436	1.25643
	1.01044	1.06496		1.44418	1.32347
	1.00665	1.20463		1.25236	0.927589
	0.929227	0.881536		1.25078	0.908124
	1.37789	1.37965		1.38156	1.43516
	1.01893	0.955121		0.968561	0.951244
	1.36723	1.5381		1.40732	1.47839
	0.817977	0.903413		1.55905	1.5801
	0.790935	0.571747		0.8006	0.615487
	0.782705	0.700747		1.13493	1.30004
	0.759199	0.675063		0.889376	0.740545
	0.997371	1.0899		1.41525	1.17504
	1.19597	1.24371		1.38522	1.4209
	0.874064	0.868252		1.78217	1.70325
	0.809822	0.965703		1.16312	1.19048
	0.925728	0.625736		1.56657	1.62996
	1.06974	0.749586		1.61973	1.5682
	0.839505	0.828191		1.09291	1.15328
	1.06868	1.12634		0.82439	0.896316
	0.840932	0.451456		1.50158	1.4678
	0.8027	0.586784		1.6082	1.42007
	1.1819	1.31651		1.6262	1.34943
	0.899927	1.09768		1.53942	1.39653
	1.34622	1.59642		1.59701	1.24298
	1.21218	1.22337		1.44575	1.38461
	0.892613	0.778918		1.59897	1.62949
	0.978096	1.04525		1.83478	1.50132
	0.948304	0.96624		1.40633	1.49741
	1.17634	1.1936		1.29735	1.18706
	1.01016	1.21187		1.3506	1.32575
	0.938514	1.0127		1.29621	1.22749
	0.868638	1.01482		1.4474	1.30086
	0.865314	0.791941		1.15291	0.916688
	1.2139	1.39744		1.18146	0.991829
	0.84757	0.656941		1.10669	1.03516
	1.23647	1.26046		1.26046	1.17247
	1.20002	1.11754		1.30971	1.27317
	0.943709	0.677369		1.21313	1.09631
	1.08328	0.613742		1.07685	0.938916
	1.10523	1.10863		1.26939	1.39895
	0.881543	0.905242		1.1317	0.846549
	1.12832	1.18889		1.2044	1.26097
	1.12685	1.2415		1.12983	1.19691
	0.928852	1.3708		1.3108	1.2554
	1.26706	1.67808		1.33537	1.14213
	0.981839	0.582923		1.16834	1.19677
	0.948302	1.24404		1.13343	1.02266
	0.992125	0.524667		1.34632	1.28419
	1.1657	1.35157		1.20569	1.23661
	1.12885	1.33783		1.23727	1.29367
	0.937028	0.580921		1.17341	1.30589
	0.850992	1.03486		1.24103	1.50636
	0.881169	0.727995		1.24291	1.64304
	0.973615	0.53632		1.0793	0.872213
	1.12083	1.24731		1.21047	0.910883
	1.08943	1.21455		0.909746	0.916689
	1.05868	0.826957		1.07566	0.935407
	1.22656	1.34283		1.08577	1.22964
	0.937916	0.867942		1.07625	0.654507
	0.934031	0.165872		0.908322	0.749041
	1.24454	1.51607		0.916125	1.03196
	0.993747	1.38596		1.31439	1.50692
	0.889577	0.557331		1.09671	1.37589
	1.08461	1.39432		1.24451	1.21728
	0.959491	1.01305		1.5885	1.32234
	0.89657	1.15716		1.27314	0.897378
	0.902064	1.09918		1.23392	0.961445
	0.924551	0.969958		1.25422	0.886513
	0.867989	0.676391		0.965651	0.574019
	0.878111	0.753156		1.09676	1.68899
	0.913668	1.02713		1.01914	1.30354
	1.08138	1.36568		0.951097	1.16387
	0.84739	0.6788		0.901433	0.717034
	0.852961	1.01208		1.22897	1.42665
	1.10257	0.847592		0.920584	1.21618
	0.976085	1.28703		0.933476	1.20411
	0.954105	1.1296		1.22968	1.4566
	0.918214	0.76547		0.913443	1.35584
	1.03994	1.17537		0.848042	0.704903
	0.943598	0.90733		0.828252	0.744336
	1.09648	1.10434		1.23848	1.26519
	0.852082	0.770697		1.0944	1.53845
	0.902814	0.780982		0.873261	0.775914
	1.32171	1.52336		0.954651	0.776339
	0.871953	0.751954		0.998696	1.33685
	1.00876	0.936443		1.21007	1.53087
	1.01423	0.926989		0.887262	1.142
	0.962976	0.978646		1.33025	1.5999
	0.872504	0.577537		1.01214	0.748429
	1.07257	0.99835		0.950264	1.00353
	0.966676	0.770911		1.08739	1.56619
	1.05977	1.20456		0.932782	0.746425
	0.925217	0.957505		1.12195	1.47977
	0.934031	1.12153		1.0051	1.29012
	1.30325	1.36882		1.05363	1.12006
	0.899067	0.995234		1.13434	0.815327
	1.03052	0.707195		1.30279	1.2858
	0.956092	0.740435		1.11024	1.02645
	0.970985	1.11785		1.14707	1.0994
	0.93982	1.14181		1.16646	0.927234
	0.868168	1.08677		1.14491	0.648157
	0.91704	0.956724		1.14971	0.779775
	0.800464	0.921085		1.25939	1.26588
	0.924312	1.03782		1.29964	1.4678
	0.900295	1.11938		1.28198	1.3481
	1.02854	1.11347		1.37892	1.55431
	0.971136	0.958578		1.28945	1.34987
	0.991244	1.14538		1.0998	0.990566
	0.967352	1.23768		1.1904	1.09197
	0.98308	0.994935		1.034	0.8109
	1.20282	0.625149		1.06208	0.390139
	1.09499	0.955952		1.14616	0.9961
	1.04927	0.943528		1.33563	0.664801
	1.10224	0.687209		1.1294	1.30099
	1.04959	0.838846		1.25047	1.46659
	1.2499	1.40551		1.0989	1.06804
	1.1531	1.18371		1.18527	0.870449
	1.26996	1.21828		1.18105	1.40022
	1.07326	1.02001		1.19195	1.25792
	1.20694	1.45783		1.12369	1.26298
	1.11267	0.982819		1.0025	0.652417
	1.08678	1.01906		0.965868	1.14117
	0.992552	0.958991		0.882701	1.0799
	1.05315	0.625945		0.84069	0.55424
	1.12563	1.5422		0.985329	0.945547
	1.00939	1.24694		0.959527	1.34781
	1.0807	1.10546		1.01255	1.2514
	1.15941	1.13123		1.14024	0.939266
	1.02391	0.831929		1.09481	1.3226
	0.86327	1.07097		1.04691	1.19311
	0.928472	1.12649		1.16707	0.854823
	0.845646	1.08084		1.2209	1.38653
	1.00556	0.819867		1.12798	0.831929
	1.08306	0.684881		0.902567	1.3226
	1.05373	0.930901		1.05163	0.892801
	0.937107	0.557078		1.06877	1.27464
	0.867931	0.816426		0.95895	0.63015
	0.850758	0.932592		0.978236	0.917242
	1.18697	1.22476		1.47408	1.45093
	0.84037	0.65827		1.81711	2.14069
	0.886714	0.922694		1.96313	2.0845
	0.819028	1.03735		1.44538	1.56498
	0.90023	1.10875		1.36527	1.0708
	0.809467	0.652209		1.48869	1.41728
	1.00084	0.773361		1.50422	0.948708
	0.992271	1.03565		1.58211	1.81609
	1.04472	1.02488		1.37306	0.718125
	0.857452	1.11558		1.16036	0.615788
	0.867693	0.814355		1.75851	2.18937
	0.956948	0.665551		1.60265	1.98663
	0.878247	0.933674		1.47157	1.83309
	0.924862	0.90795		1.20196	1.32481
	0.824966	0.822638		1.3473	0.873658
	0.990938	1.1854		1.48349	1.66958
	0.85009	0.847015		1.37758	1.64606
	1.03764	0.675693		1.0006	0.71395
	1.13069	0.668863		1.44015	1.28067
	0.939121	0.85244		1.49681	1.6191
	0.904567	0.984536		1.53183	1.47055
	0.981198	1.11108		1.61728	1.9761
	0.856878	0.694757		1.46239	1.36359
	1.09576	1.39348		1.57763	1.56881
	0.904403	0.963754		1.4737	1.44465
	1.00294	1.04098		0.925341	0.712861
	1.08608	1.4293		0.993538	1.19894
	0.856072	0.776742		0.967745	0.995324
	1.02968	1.20797		1.25064	1.17513
	0.89389	0.74352		1.09848	0.903487
	0.934145	1.07421		1.51522	1.86771
	1.0757	1.1348		1.26094	1.30945
	0.934612	0.855261		1.18838	0.732718
	1.10935	1.1222		1.58516	0.973479
	0.881823	0.395786		1.22599	1.29241
	1.42488	1.75652		1.27644	1.17794
	1.49452	1.75587		1.07003	0.378246
	1.16818	1.43462		1.61052	0.773331
	0.813095	0.495627		1.24427	0.725271
	0.772167	0.66557		1.04256	1.08352
	0.722111	2.61051		1.6253	0.732653
	1.06588	1.04467		1.75435	0.774176
	1.00229	1.65053		1.17625	0.964632
	0.873529	0.683076		1.19512	1.34989
	0.961154	1.12195		1.41459	0.87224
	0.995472	1.0131		1.35186	1.32733
	0.878523	0.907816		1.25811	0.49245
	0.755728	0.764489		1.21327	0.89753
	1.41345	1.58842		1.8933	0.891896
	1.43697	1.14992		1.09795	1.13014
	0.948262	0.765762		1.13356	0.586927
	1.13307	1.35315		1.15152	1.19685
	1.05187	1.09823		1.17896	1.0762
	1.35717	1.03185		0.971131	0.854483
	0.898491	0.738675		1.13372	0.880582
	0.944333	0.636214		1.05011	1.04635
	1.42047	1.03404		1.09711	1.02956
	0.955465	0.654614		1.04444	1.07935
	0.823637	0.588726		1.16884	1.05214
	0.78952	0.768858		1.09571	1.20686
	0.984252	0.749727		0.967871	0.385024
	0.834908	0.449848		1.03753	0.849207
	0.894151	0.695563		1.02829	0.671766
	0.913359	1.02248		1.21966	1.13635
	0.914158	0.388004		0.922188	0.579685
	1.02024	1.13903		1.05305	1.44318
	0.877872	0.68349		1.14347	0.994059
	0.845861	0.557272		1.70185	0.818355
	0.876571	0.954097		0.995476	0.653826
	0.996174	0.623385		1.13682	1.23676
	1.02023	1.24195		1.25927	1.28802
	1.13551	1.27805		1.07977	1.08128
	1.05518	1.10152		1.13456	1.00562
	1.17784	1.23322		1.05439	1.12024
	1.05151	1.04174		1.12494	1.14439
	0.804316	0.404097		1.16941	1.20029
	0.993923	1.06739		1.05256	1.1994
	0.963961	1.14333		1.08803	0.624275
	1.30115	1.5757		1.1133	1.07272
	0.967467	1.20661		1.38594	1.38443
	0.958032	0.90558		1.20397	1.01829
	0.955436	1.0955		1.42226	1.42217
	0.922391	0.971027		1.62732	1.50169
	0.772342	0.821674		1.25362	1.16943
	1.00927	0.917253		1.2432	1.28022
	1.078	1.16137		1.54823	1.36594
	0.982892	1.04439		1.17031	1.32427
	1.1061	1.29653		1.06326	1.07717
	1.08669	1.1181		1.34377	1.486
	0.970028	0.876437		1.28623	1.43586
	1.05289	1.11932		1.58856	1.72507
	1.19182	1.13225		1.41656	1.50105
	1.12618	1.1186		1.36945	1.37832
	1.10696	1.14013		1.43064	1.49867
	0.871503	0.924927		1.88702	2.12175
	1.12007	1.50484		1.47222	1.57305
	0.90127	2.22421		1.32731	2.40062
	0.867312	1.22599		1.35972	1.54689
	0.961209	1.45111		1.13372	1.55903
	1.16562	0.595754		1.39301	1.75931
	1.16013	1.47429		1.28972	1.58921
	1.22537	0.892376		1.03221	1.04074
	0.874114	0.635465		1.46305	1.33319
	1.0771	0.689387		1.56241	1.85055
	1.1108	0.842002		1.61646	1.39296
	1.05009	0.935419		1.44414	1.27119
	1.18832	1.67571		1.78174	2.18697
	0.96514	0.741386		1.06109	0.949494
	0.997943	0.756273		1.89616	2.40062
	0.910789	0.7534		1.55764	1.7931
	1.2956	2.00671		1.54131	1.70936
	1.25975	0.678095		1.25821	1.31523
	1.27278	0.988608		1.29667	1.51708
	1.03649	1.29489		1.55829	1.56045
	0.904841	0.928259		1.42774	1.75909
	0.959591	1.10508		1.4816	1.58801
	1.02251	0.814812		1.2091	0.98591
	1.1466	1.54474		1.3678	1.42967
	0.943488	0.833188		1.4706	1.82631
	1.21919	1.04897		1.2546	1.39203
	0.9428	1.18606		1.71745	2.09377
	0.986017	1.08903		1.62233	2.20993
	1.1251	1.05132		1.31331	1.37575
	0.915127	1.10619		1.28211	1.38819
	0.943729	1.05038		1.15481	1.27387
	1.03072	1.05867		1.64281	2.01232
	1.18721	1.17705		1.45599	1.87983
	0.882659	0.813166		1.31253	1.32965
	0.830423	0.817016		1.26146	1.74715
	0.869177	0.688098		1.2252	0.988827
	0.863386	0.607099		0.932168	1.23283
	0.88475	0.863965		1.37845	1.26782
	0.78882	0.834584		1.36075	1.25629
	1.00241	1.15478		1.02757	0.66898
	0.814808	1.13498		0.958643	0.165701
	0.911241	0.948144		1.16454	0.756461
	0.972762	1.02947		1.15751	0.874027
	0.776297	0.564082		1.15994	1.08543
	0.784711	0.562		1.13202	0.93376
	0.781426	0.636934		1.63247	0.581095
	1.30561	1.28713		1.16726	0.730017
	0.897951	0.586978		1.21524	0.797897
	0.988318	0.875382		1.25082	1.15389
	0.922723	0.702501		1.19986	0.823102
	0.889121	0.952114		1.27525	1.08813
	0.879477	0.660317		1.12478	0.843355
	1.00685	1.20413		1.29218	1.38299
	0.998091	0.61726		1.22648	1.38131
	0.86774	0.935834		1.20624	0.88861
	0.839365	1.40469		1.22374	0.772033
	1.11184	0.7632		0.948808	0.63092
	1.12332	1.00415		1.40812	1.2843
	1.63792	1.02964		1.2027	0.813958
	0.958326	1.14221		1.19361	1.1011
	0.862563	0.797118		1.34997	1.38948
	0.947886	0.987663		1.33069	0.876535
	1.01248	1.09902		1.13239	0.901914
	0.820734	0.936667		1.15	1.13338
	1.3098	1.48228		1.22841	1.02062
	1.15447	0.896508		1.25643	1.40889
	1.0705	0.855991		1.32985	0.943212
	1.28256	1.30984		1.26733	1.09239
	1.07529	0.618286		1.23009	1.16538
	1.05272	1.08262		1.54232	1.39345
	1.13088	1.28517		1.01174	0.926815
	0.973378	0.474664		1.0612	0.859274
	0.983833	0.946113		1.16671	1.13249
	1.22608	1.39634		1.18095	1.07217
	0.925838	1.01918		1.11211	1.03413
	1.01638	1.07353		1.36492	1.15383
	0.934863	0.691558		1.43248	1.25242
	1.19226	0.873872		0.939021	0.429637
	0.944917	1.02051		1.1891	1.58132
	0.882789	1.11168		1.21104	1.02576
	1.04324	0.596306		1.21737	0.833485
	0.966835	0.953081		1.11041	0.957998
	0.981254	1.03649		0.859992	0.964175
	0.987109	1.09717		1.19782	1.09417
	0.923309	0.975238		0.8881	0.459737
	1.02877	1.0617		1.21413	1.20249
	1.0383	0.987338		1.06155	0.997036
	1.05433	1.06335		1.31735	1.16277
	0.981916	0.926279		1.04007	0.936535
	0.960865	0.917979		1.15793	1.00541
	0.958678	1.0033		1.07523	0.95871
	0.933662	0.384234		1.22355	1.20305
	1.0878	1.41388		1.20392	1.30767
	1.01934	1.08696		1.16765	0.835662
	0.906566	1.14965		1.25253	1.18036
	0.835351	0.511101		1.3649	1.24664
	0.900086	0.990767		1.12554	1.04736
	0.991004	1.09112		1.10511	1.04046
	0.95683	0.917518		1.19164	1.20488
	1.08641	1.57953		1.21752	1.06242
	0.815694	0.77843		1.2987	1.3369
	0.993361	0.934596		1.07124	1.0571
	1.12096	1.56196		1.24928	1.15392
	1.14134	1.31617		1.2073	1.02753
	0.751054	0.82		1.14841	1.03094
	0.958637	1.16409		1.42379	1.39767
	1.09986	1.45629		1.24998	1.17447
	0.839925	0.612874		1.08815	1.06949
	0.840487	0.47812		1.20196	1.04253
	0.803423	0.659152		1.21866	1.19425
	1.24293	1.6083		1.3277	1.03305
	0.892159	0.502624		1.65708	1.60275
	0.825379	0.577852		1.08641	0.974094
	0.889478	1.0415		1.26856	1.21159
	1.15753	1.44219		1.19487	0.982194
	0.936366	1.04335		1.2233	0.908054
	0.882139	0.891377		1.32109	1.05948
	1.1384	1.42172		1.19902	1.02003
	0.77916	0.580456		1.22747	1.42876
	0.958047	0.676238		1.23751	1.50164
	1.13548	1.55156		1.14159	1.02555
	0.986151	0.821944		1.17131	1.38286
	1.27877	0.947891		1.76298	1.89214
	1.02192	1.00333		1.32234	1.39254
	1.21828	1.42509		1.49588	1.73282
	1.17139	1.46617		1.31274	1.38862
	0.969078	0.517861		1.18522	1.42159
	0.976071	0.981853		1.28128	1.37674
	0.936643	0.803306		1.37364	1.2401
	1.28314	1.54068		1.31672	1.6243
	0.982187	1.25993		1.03619	1.30955
	0.876377	1.17449		1.37564	1.57025
	0.903578	1.16895		0.909388	0.897256
	0.895252	0.853422		1.30672	1.37829
	0.946225	0.86617		1.60262	1.80979
	1.10744	1.17374		1.1366	1.27573
	0.87548	0.536466		1.06146	0.7771
	1.18795	1.63978		1.28162	1.24396
	0.841596	1.10669		1.64568	1.94629
	0.915266	0.505681		0.860548	0.60509
	1.03801	1.22557		1.17859	1.24193
	0.90109	1.20233		0.935568	0.518196
	1.13456	1.45872		1.28036	1.48889
	0.96896	1.3518		0.985443	1.19099
	0.824345	0.793427		1.50543	1.51595
	1.07705	1.1701		1.42045	1.74932
	0.796938	0.261267		1.30554	1.4401
	1.07413	0.562785		1.2119	1.27822
	0.849799	0.483449		1.11387	0.714561
	1.09667	0.728206		0.930046	0.778253
	1.0449	1.1781		1.12246	0.921019
	0.944245	1.13098		0.778952	0.857168
	0.970473	0.934987		1.02552	0.966451
	0.935386	0.56158		1.16048	1.47031
	0.849267	0.804207		1.23908	1.38924
	1.01272	1.52899		0.913756	0.507381
	0.818616	0.92621		1.40166	1.713
	1.37422	1.06326		1.48826	1.80394
	0.791992	0.779931		1.50685	1.92104
	1.14276	1.4585		0.894122	0.99201
	0.820126	0.496875		1.73275	1.76605
	0.965852	0.458454		0.90648	0.794618
	1.08079	0.948954		0.92764	0.635164
	1.03615	1.30038		0.884326	0.860846
	0.95878	0.996116		1.10659	1.28174
	0.873308	0.792848		0.986984	0.431416
	0.832492	0.589407		1.12709	1.20881
	0.967428	0.546196		1.10957	1.13859
	0.871425	0.905839		1.41718	1.46053
	1.07334	1.24849		1.11669	0.927228
	1.21789	1.50876		1.28011	1.05426
	1.04759	1.29111		1.03713	0.759057
	1.23589	1.51873		1.52328	1.74206
	0.967208	0.697523		1.0922	1.65898
	1.15103	1.14249		1.21171	1.01138
	1.1333	1.38537		1.01306	0.730265
	0.919743	0.42697		1.49502	1.67304
	1.05144	0.459098		1.17234	1.00463
	0.841914	0.713846		1.28739	1.44919
	0.813974	0.305204		1.14782	0.929191
	1.31205	1.40228		1.39538	1.5139
	0.644836	0.437374		0.901846	0.763924
	1.09421	1.3908		1.34015	1.38941
	0.694827	0.335032		0.988842	0.776016
	0.749461	0.876129		0.856612	0.742764
	0.955682	1.09476		1.16874	1.17359
	1.20068	1.39371		1.39338	1.37562
	0.789954	0.721906		1.29247	1.2384
	1.42158	1.64502		1.18234	1.07266
	1.03761	0.650703		1.21001	1.12618
	0.944344	1.02007		0.830735	0.114394
	1.12833	1.11189		1.52547	1.60983
	1.0811	1.2275		1.57074	1.64922
	0.884934	1.07851		1.42272	1.45567
	0.929315	0.699417		1.88462	2.12101
	1.1429	1.38672		1.58632	1.86739
	1.34508	1.37271		1.06331	1.00479
	0.957626	0.670869		1.48812	1.38226
	1.2312	1.53519		1.57456	1.71767
	0.849717	0.882462		0.960067	0.667296
	0.652623	0.718789		0.892083	0.910001
	1.03882	1.17069		0.952389	0.976582
	1.2338	1.47165		1.17895	0.822844
	0.84294	0.919533		1.28296	1.31616
	1.37589	1.69016		1.15502	0.983612
	0.674072	0.484488		1.75185	1.83588
	1.39433	1.72287		1.78591	1.66742
	0.711319	0.90437		1.84363	1.88971
	0.802156	0.8539		1.79011	1.77761
	1.01643	0.950103		1.09135	0.927
	1.07235	1.06418		1.15876	1.2835
	1.20718	1.13427		1.20173	1.20064
	0.952892	0.812195		1.74199	1.95804
	0.944483	0.694835		1.78553	1.85429
	0.974352	0.915973		1.32616	1.15483
	1.13415	1.1872		1.45158	1.6189
	0.968203	0.855834		1.00789	1.13063
	1.07791	1.12461		1.02211	1.08197
	0.986301	1.22803		1.62381	1.63454
	1.29549	1.40085		1.47205	1.42116
	1.15209	1.11421		1.33145	1.29906
	0.933624	0.84876		1.55179	1.57079
	0.94299	0.994712		1.06248	1.11413
	0.993958	1.00407		0.967484	0.824057
	0.733879	1.08886		0.899697	0.922971
	1.03959	1.31303		1.35102	1.59048
	0.938445	0.910913		1.05166	1.06334
	0.965399	1.00174		1.26435	1.39276
	0.87843	0.856948		1.20894	1.39965
	0.886849	0.831953		1.2985	1.53096
	0.869754	0.800755		1.21525	1.47315
	0.832226	0.619072		1.0905	1.1649
	0.872642	0.917406		0.934848	0.463857
	0.897141	0.925116		1.33444	1.62429
	1.40751	1.60962		1.17181	1.2866
	0.829703	0.625624		1.17578	1.3031
	1.16289	1.22363		1.1466	1.29798
	1.22626	1.34015		1.05657	1.04852
	1.0345	0.958332		1.41344	1.56162
	1.00586	0.961347		1.15268	1.51801
	0.827635	0.814459		1.33185	1.51123
	0.848956	0.79726		1.12219	1.08266
	0.863473	0.984696		1.06673	1.09769
	1.18183	1.33406		1.34169	1.43494
	0.887037	0.921631		1.29333	1.36967
	1.02586	1.1339		1.1696	1.15967
	1.10769	1.13754		1.19396	1.27152
	1.18034	1.28789		1.27029	1.44939
	0.952143	0.748826		1.46515	1.68966
	0.885799	0.641421		1.04064	1.32229
	1.16126	1.34202		1.35125	1.40305
	1.08738	1.24947		1.09609	1.32145
	1.01128	0.848642		1.91962	2.22397
	1.15895	1.25948		1.38226	1.52374
	0.691542	0.915149		1.46765	1.63868
	1.05009	0.872251		1.0666	1.19504
	0.88164	0.482087		1.20701	1.38823
	1.01564	1.03907		1.40471	1.47292
	0.843274	1.0855		1.39331	1.51515
	0.855099	0.292041		1.42208	1.6568
	1.03259	1.16466		1.46463	1.44719
	0.945722	0.97263		1.52763	1.89673
	1.0332	0.83238		1.46981	1.39551
	1.00456	0.856153		1.51148	1.50314
	0.979276	0.958691		1.69386	1.87594
	0.993171	0.576492		0.876525	1.05877
	0.970979	0.755073		1.10115	1.54039
	1.13478	1.315		0.933648	1.39293
	1.22467	1.41488		0.796404	1.16673
	0.928417	0.810938		1.03847	0.47854
	1.0752	1.10043		1.07895	0.979589
	0.924502	1.22128		0.982288	1.1042
	1.1145	1.10777		0.882838	0.313922
	1.04796	1.15025		1.02422	1.27405
	0.976963	1.00384		1.00414	1.26913
	0.89343	0.818527		0.957684	1.08967
	0.996943	1.0628		1.12872	0.708125
	1.11593	1.20976		1.02593	0.488279
	1.0592	1.23674		0.948393	1.38617
	0.888712	0.924618		1.20097	1.37126
	0.865876	1.02684		1.0005	0.502467
	0.939943	0.847799		0.985276	0.638201
	1.07035	1.05338		1.01452	1.28142
	0.920052	0.873508		1.01427	0.757788
	1.08083	1.23531		1.01877	0.711209
	1.35736	1.3969		0.996373	1.07551
	0.937848	0.822765		1.07066	1.25323
	1.06688	1.08202		1.2418	1.25361
	0.98596	1.09202		1.04596	1.23435
	1.1467	1.08868		0.908665	0.806888
	0.927604	1.01053		1.04511	0.858181
	0.966373	1.10859		1.03053	0.76837
	0.843507	0.712436		1.53032	1.49418
	0.981863	0.967018		0.969159	0.499476
	1.02724	0.98857		1.11497	0.69149
	1.12187	1.22421		0.990335	1.24952
	0.769875	0.679673		1.20963	1.41897
	0.932482	0.735549		1.05327	1.3131
	1.01832	1.18377		1.07286	0.43497
	0.954528	1.31175		0.986529	0.821794
	0.815989	1.14144		1.08168	0.824917
	0.923867	1.53139		1.0312	0.942549
	0.808239	1.18173		1.07668	1.0964
	1.46371	1.00621		1.19217	0.940745
	1.14762	1.41925		0.831071	0.698151
	0.871322	1.22841		1.34625	0.90193
	0.981006	0.70629		1.34606	1.32408
	0.998634	0.552075		1.32682	1.13463
	0.920536	1.30339		1.24631	1.00873
	0.822705	0.290498		1.29277	1.07454
	0.831849	1.12711		1.17799	1.20469
	0.929179	0.527264		1.02365	0.872086
	0.725595	1.04377		1.20421	1.18776
	1.06362	0.65272		1.00375	0.749812
	0.797809	0.475428		1.07041	0.813836
	1.04162	1.47899		1.2185	0.667403
	1.20285	0.756299		1.57421	1.25541
	0.956453	1.25966		1.1318	1.07827
	0.830628	1.14684		1.12762	1.20803
	0.849622	1.02191		0.974558	1.31714
	0.887751	0.613898		1.30847	1.14598
	0.815542	1.31437		1.16322	1.04899
	0.823911	0.449827		1.23925	0.842144
	1.16482	1.86416		1.34354	0.734144
	0.904278	1.26792		1.2086	1.04331
	0.985111	1.34224		1.1494	0.886022
	0.774655	0.440655		1.24342	0.775565
	0.845276	0.447549		1.11488	0.864349
	0.918758	1.05617		1.1698	0.944531
	0.792075	1.18964		0.910721	0.608847
	1.53874	0.930691		1.14326	1.12086
	0.984903	1.61655		1.0201	0.969077
	1.53076	1.08603		1.20352	1.21228
	0.743871	1.21449		1.2131	1.15551
	1.87464	1.1855		1.02873	1.18378
	0.949434	1.46013		0.913654	1.48222
	0.944163	1.47559		1.2118	0.90193
	1.12062	1.6939		1.15331	0.714291
	1.09572	1.166		0.981711	1.26237
	0.978842	0.622102		1.08795	1.6459
	0.977275	0.585598		1.14428	1.18254
	1.29112	1.80305		1.15836	1.37304
	1.11521	0.735701		1.08188	0.76503
	0.826523	0.743731		1.13028	0.941371
	0.984608	0.714176		1.0442	0.863465
	1.08405	1.49313		0.838199	0.669425
	1.0185	0.659245		1.01417	0.938819
	0.964489	1.25596		1.18458	0.96355
	0.900033	0.687237		1.24118	1.46371
	0.888279	0.612132		1.08206	0.739091
	1.07738	0.68026		1.07542	1.2375
	1.24776	0.772053		0.776968	0.581289
	1.10791	0.649091		0.955787	0.71128
	0.917198	0.608809		1.00737	1.1076
	0.966657	0.727719		0.913499	0.854382
	1.02177	0.672249		0.887506	0.737461
	1.07858	1.13485		0.961875	0.981927
	1.1334	1.0878		0.925646	0.999113
	1.12221	0.980649		1.05133	1.07569
	0.866245	0.771082		1.07125	1.01508
	0.975753	1.06946		1.01044	0.882025
	0.919688	1.06296		0.997251	0.925466
	0.883939	0.962794		0.878152	0.897829
	1.1207	1.32517		1.28552	1.38858
	1.18352	1.02697		1.24919	1.36679
	1.02896	0.937081		1.59171	1.874
	0.99863	1.16022		0.835487	0.53771
	1.08265	1.14409		1.57968	1.81681
	0.939973	1.03821		1.20282	1.17453
	1.28088	0.806342		1.195	1.21306
	0.981889	1.12215		1.14672	1.40311
	0.978738	1.10901		1.14823	1.21976
	0.975558	1.19429		1.48283	1.2288
	0.878268	1.14366		1.32949	1.46422
	0.80032	0.874895		1.3398	0.942574
	1.06746	0.898707		1.36592	1.36032
	0.786018	0.941937		1.24283	1.35956
	1.03289	1.32722		1.29348	1.22427
	0.877213	0.603196		1.26919	0.921439
	1.0052	1.18002		1.62726	1.32906
	0.947487	1.26798		1.74248	1.7275
	1.16874	1.46869		1.1467	0.97083
	1.03619	0.97615		1.05817	0.900645
	0.909617	0.856695		1.02221	1.0415
	0.998514	1.03743		1.25781	1.45153
	0.811724	0.539497		1.30326	1.22822
	0.936267	1.01209		1.60577	1.43317
	0.856389	0.685479		1.84625	1.71165
	0.902409	1.07119		1.6366	1.71276
	1.09131	1.04648		1.30486	1.14692
	1.02581	1.13674		1.78967	1.65295
	0.878894	0.945764		0.967332	0.678991
	0.99299	1.11823		1.3675	1.5613
	0.908637	0.670129		1.23523	1.46391
	1.02458	1.13665		1.50059	1.69128
	0.91107	1.14907		1.28446	1.52062
	0.904623	0.783382		1.22189	1.41224
	0.795627	0.611196		1.45319	1.79501
	1.08443	0.748016		0.984633	0.851938
	1.01861	1.27651		1.59209	1.9046
	0.974997	0.990305		1.3739	1.72862
	1.01964	1.22407		1.33505	1.74091
	1.18888	1.40609		1.69708	1.88474
	1.08519	1.52911		1.71186	2.00973
	0.986307	1.01963		1.27001	1.5515
	0.91868	0.913981		1.27861	1.52883
	0.938499	0.941969		1.41829	1.72478
	0.93288	0.951995		1.43892	1.74499
	0.931036	1.0605		1.45972	1.7592
	0.965767	0.843881		1.43309	1.6963
	0.829179	1.03628		1.6242	1.76477
	0.927476	0.853712		1.08283	1.32717
	1.06974	1.02959		1.33954	1.50598
	1.09149	0.644437		1.41595	1.61465
	0.873293	1.07939		0.978479	0.730273
	1.4094	1.51381		1.12217	1.16749
	0.902804	0.680156		1.40911	2.10162
	0.857644	0.45148		0.967843	1.07919
	1.06529	0.933394		1.21678	1.6616
	1.05965	0.994704		1.33487	1.53436
	0.883417	0.720432		1.4711	1.7997
	0.935401	0.875878		1.11353	1.29378
	1.10468	0.990476		1.26414	1.38127
	0.895696	0.492531		0.952158	1.28696
	0.975516	0.625779		1.04445	0.986666
	1.04246	1.1743		1.51424	1.72935
	0.894274	0.841875		1.50527	1.71653
	1.14066	0.968786		1.04473	1.10959
	1.12608	1.15723		1.27029	1.5883
	1.05278	1.1645		1.00569	0.74766
	1.05897	1.08962		1.30383	1.58794
	1.14756	1.07083		1.28086	1.45683
	1.51206	1.28913		1.20077	1.57974
	1.3445	1.45498		1.27458	1.32039
	0.914933	0.929922		1.11024	1.35978
	1.12416	1.17391		1.41481	1.69156
	0.769917	0.651578		1.05971	1.15098
	0.886674	0.799859		0.988444	0.663321
	1.1402	1.28608		1.01434	0.865351
	0.837603	0.810932		1.14753	1.28854
	0.839454	0.689139		1.27466	1.28564
	0.867819	0.789847		1.2851	1.20128
	0.955549	1.0763		1.12228	1.02722
	1.67383	1.90333		1.16909	1.0925
	1.42282	1.5151		1.37815	1.44658
	0.812221	0.742003		1.48205	1.60042
	0.895887	1.39277		1.40955	1.30228
	1.22392	1.24978		1.11234	1.32356
	0.98929	0.80521		1.2647	1.07635
	1.0181	1.14832		1.19953	1.0458
	0.917594	1.03804		1.0733	1.19319
	1.09519	1.12637		1.12694	1.21392
	0.878778	0.864975		0.980615	1.71975
	0.87535	0.900563		1.1526	1.0539
	0.979565	1.0161		1.01381	0.799746
	1.10527	1.18507		1.10366	1.12974
	0.846954	0.678547		0.999116	0.973962
	1.12795	1.05483		1.338	1.14664
	0.960145	0.783404		1.29392	1.15031
	0.878214	0.648013		1.06554	0.963717
	0.799915	0.399114		1.31681	1.32346
	0.989231	0.996537		1.48351	1.48007
	0.828976	0.889361		1.2224	1.35494
	0.886326	0.835589		1.26756	1.40178
	0.857634	0.639353		0.847392	0.55402
	1.17488	1.19637		1.01388	0.646299
	1.2673	1.5275		1.30938	1.46337
	0.871215	0.773149		1.2006	1.16111
	0.829304	0.907397		1.40784	1.50091
	0.951624	1.14182		1.39729	1.51849
	0.844704	0.142101		1.2227	1.30292
	0.870542	0.974567		1.07144	1.06618
	0.993363	1.3867		1.16824	1.18755
	0.988664	1.16641		1.08857	1.18935
	0.900252	1.01169		0.944175	0.927074
	0.845731	1.01241		1.09478	1.24406
	0.96178	0.961643		1.2803	1.44737
	1.18824	1.32393		1.01075	0.902897
	1.22662	1.36479		0.926234	1.1846
	0.935742	1.02106		1.0705	0.890964
	0.89427	0.749867		1.09533	1.37343
	0.914089	0.774472		1.39993	1.48276
	0.933358	0.711239		0.987518	1.21444
	0.870371	1.08944		1.08684	1.35082
	0.861836	0.868695		1.11391	1.19621
	1.02723	1.10064		1.13003	1.17741
	0.992382	1.10745		1.07265	0.896053
	1.37503	0.491495		1.18756	1.24274
	0.935285	0.743972		1.07692	0.6248
	1.03714	1.16288		1.10055	1.05064
	1.25029	1.12722		1.62133	1.79234
	1.31376	1.56332		1.57311	1.45177
	0.916171	0.919638		1.06276	0.860855
	1.03453	1.03625		1.53553	1.54379
	0.965818	0.891166		1.37701	1.39513
	0.936988	0.944534		1.44725	1.37135
	0.905257	0.74		1.32516	1.34989
	0.901724	0.752512		1.44973	1.28141
	1.25791	1.65586		1.16411	1.24694
	0.933544	1.03324		1.13871	1.32319
	1.14908	1.14966		1.13443	1.06362
	0.859114	0.914733		1.26324	1.1261
	0.924684	1.06149		1.04742	0.763474
	0.826425	0.438002		1.37121	1.52936
	1.18867	1.2661		1.18185	1.20641
	0.967743	1.2726		1.44861	1.68793
	0.911455	0.896861		1.12509	0.504026
	0.959968	1.18123		1.40945	1.14791
	1.04157	0.967012		1.4485	1.2636
	1.13442	1.05138		1.57759	1.47497
	0.951163	0.968326		1.37111	1.40937
	0.930585	0.720177		1.31938	1.13495
	1.41818	1.43022		1.03686	0.688925
	1.1516	1.12499		1.43967	1.34293
	1.31418	1.47361		1.41745	1.27984
	1.11784	1.10061		1.36756	1.52609
	1.13138	1.25386		1.39305	1.07943
	0.913494	0.746951		1.24788	1.09875
	0.92047	0.580489		1.10049	1.04625
	0.933407	0.765301		1.65511	1.71507
	0.876556	1.00175		1.59292	1.49877
	1.04147	1.22029		1.52832	1.24856
	1.04055	1.05408		1.43997	1.36514
	0.966583	0.972306		1.44169	1.11695
	1.01347	1.05981		1.43373	1.4992
	1.15441	1.28219		1.23473	1.32213
	0.887926	1.04299		1.37566	1.58045
	0.943191	1.02579		1.24673	1.39518
	1.12818	1.22845		1.27975	1.03893
	0.9923	1.12629		1.25686	1.28712
	0.835027	0.768008		1.2809	1.44125
	0.854708	0.720797		1.34918	1.82052
	0.848889	0.77209		1.01607	0.82389
	1.12084	1.28188		1.23749	1.56638
	0.892935	0.739911		1.38872	1.72648
	1.10245	1.19357		1.31084	1.67463
	0.970918	0.953437		1.38522	1.45751
	0.858525	0.984414		1.19815	1.09086
	0.893931	1.03243		1.39682	1.55758
	0.993283	0.848825		1.19691	1.24364
	0.780249	0.688848		1.0662	1.23251
	1.01148	1.0135		1.2521	1.13988
	1.08879	1.13681		1.43388	1.62379
	0.949925	1.05713		1.16316	1.31241
	0.866174	0.381297		1.22159	1.09667
	1.21474	1.27341		1.05653	1.30438
	0.954747	0.942922		1.36157	1.61174
	1.04429	0.956112		1.265	1.3328
	1.00343	0.915965		1.36576	1.56507
	1.07368	1.11076		1.13602	1.3918
	1.21736	1.30091		0.98245	1.07855
	1.28072	1.38706		1.11171	1.05896
	1.27551	1.36462		0.983369	0.875752
	1.4726	1.50469		0.92436	0.94393
	0.977836	1.0183		1.10465	0.779807
	0.925184	0.530231		1.25099	1.45876
	1.10069	1.15185		0.942551	1.00137
	0.977779	0.932385		1.12548	1.24822
	1.13003	0.932022		0.956338	1.08938
	1.16085	0.99212		1.34502	1.37034
	1.19612	1.17859		1.15043	1.19497
	0.958473	0.76414		1.28329	1.26416
	1.13359	1.1897		1.13832	1.21648
	1.02903	0.877592		1.15344	1.2533
	1.00475	0.901031		1.17869	1.12275
	1.23146	1.39747		1.22051	1.35827
	0.965735	1.03587		1.01314	0.954612
	1.04772	0.998835		1.08281	1.30722
	1.00811	0.883416		0.951175	1.06192
	0.952277	1.02988		1.22368	1.38206
	0.886254	0.767715		1.02471	0.820971
	1.04191	1.045		1.0415	1.08635
	1.03248	0.794097		1.16095	1.25796
	0.917811	0.782777		1.02608	0.911327
	1.0038	1.06136		1.1945	1.20845
	0.916055	0.991		1.1639	1.33348
	0.831733	1.10913		1.21572	1.11817
	0.834162	0.7281		1.13889	1.2754
	1.04714	1.16526		1.21808	1.27691
	0.843263	0.746196		1.14561	1.34603
	0.73267	0.838642		1.20077	1.49973
	0.899602	1.02988		1.33296	1.36083
	1.14056	1.23453		1.06934	1.17874
	0.829903	0.946211		1.30358	1.26948
	0.783375	0.832114		1.20887	1.21345
	0.887842	0.951058		1.06827	0.960026
	0.849924	0.891888		0.97438	0.970324
	0.809983	0.801149		1.18355	1.05662
	0.897286	1.03339		1.13964	1.10158
	0.871651	0.917482		1.25995	1.06446
	0.912522	0.887533		1.24097	1.19344
	0.984265	1.07478		0.973683	1.10195
	0.957845	0.624148		1.22829	1.07293
	1.11198	0.929917		1.11134	1.16646
	1.04161	1.04475		1.19234	1.27792
	0.957235	0.926476		1.24524	1.45316
	0.938435	0.931012		1.128	1.31778
	1.0303	1.09252		1.31858	1.64499
	1.11668	1.06993		1.08117	1.16904
	0.895992	0.632888		1.1829	1.05447
	1.06367	1.15516		1.10675	1.29829
	0.859611	0.794257		0.964835	0.945616
	1.11746	1.42284		1.11285	1.25319
	0.944821	0.856077		1.0632	1.1487
	0.988083	0.985374		1.01415	1.04213
	1.45348	1.69037		1.0767	1.05956
	1.09676	1.06945		1.26049	1.52873
	1.08227	1.11628		1.0192	1.35121
	0.884051	0.629341		1.17048	1.29152
	0.861709	1.32099		0.953188	0.985298
	0.954248	0.755298		1.08417	1.01454
	1.06072	1.36137		1.30337	1.30869
	0.934981	0.833187		1.04316	1.28987
	0.908166	0.908356		1.07606	1.13871
	0.960318	0.65925		1.08344	1.02093
	0.994518	0.856153		0.926721	0.998187
	0.898715	0.814112		1.10293	1.20113
	1.06325	0.975332		1.09109	1.36108
	0.859414	0.972831		1.15382	1.07222
	0.862533	0.563291		0.96749	0.877119
	0.903363	0.624243		0.962699	1.11959
	1.00418	1.00722		1.14459	1.09046
	0.788126	1.04599		1.02707	1.06742
	0.942427	1.12575		0.952862	1.02333
	1.3347	1.45802		1.0702	1.05834
	0.868518	0.945363		0.970083	1.05655
	1.006	1.02488		1.0936	1.10297
	1.08941	1.16638		1.05741	1.20136
	0.961436	0.897934		1.00025	1.04675
	1.12077	1.23447		1.05068	1.25715
	1.05714	1.22486		0.973249	1.07726
	0.91625	0.880982		1.15929	1.18793
	0.918328	1.11171		0.885973	1.02324
	0.905509	0.81939		0.983024	0.243503
	1.285	1.44185		0.905161	1.06687
	0.951574	1.01424		0.982781	0.136712
	0.910079	1.00267		1.01904	0.947182
	0.948722	0.953105		1.0411	1.01734
	0.987095	1.16451		1.14937	1.46416
	0.974336	0.997958		1.05241	1.10372
	0.913809	0.924815		0.886668	1.07925
	1.21195	1.35106		1.08665	1.1221
	1.01733	0.888693		1.14504	1.30348
	0.975629	0.877711		1.12691	1.3295
	0.994945	1.03723		1.17963	1.30359
	0.990304	1.25876		1.05711	1.12621
	0.920637	0.555753		1.1692	0.948952
	0.997553	1.08744		1.18703	1.29923
	0.849705	0.849892		0.931967	0.821845
	0.809848	0.486248		1.26356	1.4745
	1.16327	1.26532		1.14697	1.19229
	1.02501	1.14003		1.03247	1.21772
	1.07235	1.05065		1.24912	1.69585
	0.905767	0.609208		1.12438	1.20196
	1.15877	1.15194		1.28966	1.40237
	1.02747	1.01197		1.09469	1.07719
	1.17593	1.28008		1.17878	1.18553
	0.948664	0.963776		1.21576	1.34287
	1.04544	1.05937		1.13178	1.18725
	1.04829	1.19365		1.31483	1.16686
	0.851783	0.714023		1.32997	1.26028
	1.12372	1.1099		1.25667	1.17195
	1.04784	0.901877		1.26797	1.29688
	0.986829	1.14979		1.18118	1.55932
	0.972159	1.20618		1.49305	2.32799
	0.998806	1.12362		1.11839	0.822035
	0.963067	1.02107		1.08021	1.10013
	1.05408	1.18308		1.06837	0.926866
	0.946039	0.89972		1.09084	1.0127
	0.870123	0.865088		0.947365	1.02828
	0.864932	0.760772		1.06599	1.29458
	0.962624	1.01429		1.1008	1.42661
	0.994881	1.08957		1.46205	2.09307
	1.19864	0.906263		1.07801	1.28422
	1.0342	1.3135		0.8988	0.945814
	0.995799	1.08905		1.48241	1.59653
	1.01673	0.970316		1.06876	1.26097
	0.998987	0.912927		1.00745	0.88546
	1.01144	1.16014		1.002	0.750877
	1.0211	1.13909		0.923478	0.811366
	1.06456	0.802962		1.2947	1.68124
	1.02991	1.16833		0.999446	0.999588
	0.905161	1.06687		1.1924	1.85827
	0.982781	0.136712		1.38754	1.72059
	1.00918	0.964207		1.24748	1.52906
	1.07013	1.15457		1.37601	1.68348
	1.10808	0.970653		1.45959	1.72536
	0.881216	0.624991		1.29296	1.48471
	0.909373	1.09049		1.31843	1.39857
	0.826065	0.887918		1.33417	1.57136
	0.922803	0.945789		0.971136	1.15323
	1.68512	2.24351		1.16546	1.49481
	0.905993	1.22925		1.07666	1.50812
	1.18947	0.917566		1.09358	0.818305
	1.15016	1.38037		1.19755	1.10728
	0.92088	0.724684		1.06575	0.95342
	1.40676	1.83607		0.958819	0.611646
	0.873049	1.10982		1.12958	1.11701
	0.864102	0.562702		1.25605	1.11081
	0.792872	0.579592		1.27331	1.38321
	0.826903	0.608592		1.40967	1.24413
	0.86463	0.313144		0.976231	0.66539
	1.28235	1.63209		1.43111	1.48092
	0.849733	0.751785		1.47673	1.46651
	1.29454	1.72127		0.913961	0.51311
	1.03147	1.21533		1.44861	1.35123
	1.14741	0.796097		1.60205	1.58357
	0.812705	0.518184		1.39793	1.27593
	1.44628	1.89308		0.832364	0.517671
	0.815674	0.509841		1.32599	1.18841
	0.853298	0.532005		1.23434	1.30963
	1.3498	1.82916		0.870052	0.346685
	0.916521	0.689798		1.25493	1.01807
	0.832098	0.451735		1.00641	0.8412
	0.805707	0.456074		1.24737	1.0573
	1.01655	1.30024		0.873779	0.426576
	0.892784	0.615285		0.992884	0.556808
	0.708303	0.720591		1.25044	0.902106
	1.071	1.29687		0.959497	0.449297
	0.708303	1.10428		1.05	0.906308
	0.909814	0.773971		1.31985	1.42146
	0.9423	1.27965		1.71707	1.7615
	1.29632	0.820046		0.98118	0.502217
	0.889564	1.06747		1.08796	0.684988
	0.717106	0.659654		1.13167	1.00414
	1.37981	1.68497		0.901222	0.503536
	0.729698	0.748947		1.22695	1.03702
	0.912041	1.10785		1.28978	1.07097
	0.841592	0.89713		1.0275	0.891532
	0.749017	0.644793		1.3018	1.18187
	1.30626	1.38378		0.693495	0.354065
	0.811187	0.674087		0.972748	0.47153
	0.776743	0.782134		0.933177	0.938706
	0.78853	0.591659		1.39737	1.37933
	0.805679	0.680543		1.21927	1.25574
	1.18867	1.32503		1.13806	1.47876
	0.930021	0.795983		1.23374	1.13674
	1.34712	1.43246		1.50901	2.01844
	0.96864	0.904283		1.28907	1.31567
	0.830874	0.727086		1.0858	1.06837
	1.15116	1.30132		1.51428	1.49093
	1.73593	1.92405		1.48581	1.62103
	1.40728	1.4365		1.47544	1.3995
	1.00253	0.938041		1.42999	1.60198
	1.02638	0.994948		1.14407	1.15864
	1.03729	1.01433		1.44873	1.84361
	1.12584	1.06692		1.21936	1.59003
	1.10864	0.95885		1.2471	1.21814
	0.936096	0.951514		1.73391	1.80196
	1.14686	1.21651		1.24456	1.0322
	0.974211	0.880796		1.31113	1.62542
	0.894446	0.844357		1.19636	1.70904
	0.799674	0.781577		1.40615	1.57507
	0.787883	0.787419		1.18504	1.67366
	1.22338	1.49015		1.30899	1.61847
	0.855346	0.804123		1.48691	1.3774
	0.856384	0.932311		1.19316	1.71257
	0.847691	0.635907		0.957	1.14092
	1.05044	0.870366		1.61323	1.60789
	0.935083	0.958958		1.33686	1.5292
	0.75215	0.634717		1.2539	1.36172
	1.20567	1.41736		1.26066	1.19993
	1.0678	1.19614		1.13087	0.528822
	1.08804	1.07118		1.51583	1.50671
	0.799497	0.539691		1.47232	1.49671
	0.889833	1.08376		1.19924	0.987271
	1.2483	1.55574		0.99511	0.757787
	1.21454	0.676072		0.946725	0.481939
	0.769565	0.931391		1.18835	1.33451
	1.32215	1.64974		0.984078	0.74649
	0.752923	0.923456		0.877508	0.813068
	0.930651	0.973051		0.919266	0.948149
	1.10329	1.3693		0.717944	0.614654
	1.22301	1.26904		0.555867	0.561349
	1.08566	1.43172		0.527692	0.53112
	0.720456	0.899245		0.366943	0.055026
	0.924449	1.06821		0.295151	0.049673
	0.737228	0.765564		0.60968	0.560592
	0.829228	0.980255		0.334019	0.073473
	0.702676	0.341541		0.340796	0.077389
	1.3738	1.01039		0.543586	0.539734
	1.19673	1.15414		0.720589	0.765534
	1.0913	1.10727		0.418587	0.270448
	1.23023	0.607357		1.48117	1.75038
	0.865784	0.899301		0.420452	0.194228
	1.00465	0.971362		0.782771	0.822492
	0.827004	0.580043		1.12652	0.944476
	1.10467	1.116		0.753924	0.600926
	0.953186	0.947629		0.397994	0.089398
	1.01976	1.07506		0.516089	0.504736
	0.813754	0.913451		0.83753	0.921272
	1.17006	1.35147		0.391092	0.137984
	0.857666	0.919951		0.394028	0.117534
	1.00853	1.04356		0.326911	0.085221
	0.957035	1.03261		0.452558	0.122689
	0.879526	0.873959		0.675105	0.520658
	1.01507	1.15613		0.320014	0.1115
	1.01513	0.995333		0.449314	0.078421
	0.991708	0.974899		0.297442	0.042928
	0.988397	0.786505		0.589807	0.269122
	1.10898	1.24591		0.460046	0.116032
	0.818246	0.929456		0.379601	0.112365
	0.916725	0.913083		0.570321	0.16467
	0.958566	0.939384		0.415597	0.152789
	1.0391	1.24983		0.711531	0.102515
	1.04383	1.11671		0.491889	0.105561
	0.871632	0.631044		0.598048	0.253706
	0.96873	0.715398		0.508329	0.109026
	1.17076	1.09711		0.490583	0.167759
	0.891429	0.470601		0.949001	0.178152
	0.944058	1.18379		0.406646	0.100621
	0.994732	0.616878		0.496526	0.165631
	1.0812	1.19158		0.480737	0.168851
	0.969248	0.796624		0.543527	0.104225
	0.98348	0.822954		1.34461	1.55443
	1.04412	0.984486		1.38372	1.75136
	0.862231	0.732558		1.27518	1.23826
	1.08208	1.3022		1.19799	0.876828
	1.04311	1.088		1.3341	1.19676
	1.03755	0.955914		1.55306	1.66342
	1.02377	1.09851		1.81974	1.96198
	0.978155	1.03028		1.3717	1.56617
	1.01557	1.28884		1.75625	1.82334
	1.13848	1.219		1.32777	1.04481
	0.935826	0.723858		1.78334	2.18258
	1.21796	0.782325		1.48451	1.4352
	0.871931	1.06495		1.57959	1.35653
	0.988717	1.01034		1.6581	1.62438
	1.08796	1.1187		1.62627	1.29207
	1.21027	1.4468		1.76543	1.38366
	0.834486	1.10387		1.79688	1.98956
	1.02401	0.894808		1.9026	1.41097
	0.982574	1.02397		1.88184	1.44423
	0.983545	0.815635		1.73432	1.27897
	1.07595	1.18794		1.74228	1.9623
	0.986372	0.983814		1.86865	1.53081
	1.09798	1.09993		1.63708	1.28097
	1.27849	1.38949		1.31732	1.3522
	0.808929	1.70857		1.42362	1.26282
	0.793336	1.1614		1.146	1.00833
	1.18656	1.51139		1.17731	1.20534
	0.987584	0.99885		1.3139	0.999885
	1.17727	0.394899		0.993991	0.699607
	1.06763	1.35408		1.57423	1.62233
	0.981073	1.22739		0.908776	0.829651
	1.16774	1.25672		1.15562	0.948912
	0.961263	1.06568		1.13122	1.02166
	0.904704	0.370836		1.04796	0.992457
	0.764903	0.933291		0.783848	0.997919
	0.849756	0.997011		1.17623	1.09949
	0.948269	0.975427		1.32763	1.37382
	0.860778	0.209112		1.28696	1.39021
	0.958253	1.08207		1.23098	1.41275
	1.14431	0.336919		1.22958	1.20749
	1.27449	1.49181		0.965272	1.25573
	0.884654	0.535049		1.24574	1.29312
	1.06608	0.884824		1.23414	1.23371
	1.18113	1.2236		0.888885	1.05848
	0.831442	0.945574		1.23872	1.39729
	1.0156	1.34445		0.913242	1.84301
	1.10245	1.30201		0.984261	1.219
	0.841087	1.01067		0.975385	1.32332
	0.91855	0.632326		1.14718	1.15901
	1.11164	1.26127		1.32953	1.20344
	0.803222	1.02796		1.29032	1.27581
	1.00403	0.778895		1.36614	1.50415
	0.810326	0.960844		1.12926	0.725725
	1.06676	1.21925		1.09815	1.10646
	1.30375	1.77068		1.08283	1.02534
	0.808433	0.986608		1.18797	1.2781
	1.22893	1.01384		1.20411	1.38873
	0.917631	1.08439		0.897166	0.828335
	0.822548	1.02575		0.913247	0.928214
	0.794086	0.774296		1.19008	1.04482
	0.950147	1.03743		1.0339	0.951835
	0.989237	1.28343		1.0261	1.082
	1.223	1.14981		1.16426	1.11534
	0.794844	0.685055		1.1782	1.22704
	1.15812	1.21213		1.19429	1.17408
	0.965411	0.804676		0.994996	0.953269
	0.994526	1.2982		1.2432	0.998082
	1.08012	0.718709		1.25443	1.23551
	0.992035	1.07447		1.27347	1.43445
	0.878578	0.755576		1.22283	0.958959
	0.893923	0.753088		1.0916	1.23871
	1.09656	0.814751		1.47438	1.50666
	1.12746	1.04278		1.33085	1.29039
	1.01573	1.14046		1.13769	1.20655
	1.10269	0.963005		0.982601	0.855396
	1.02128	0.898168		1.39264	1.51132
	1.17586	1.12052		1.33882	1.42987
	0.889833	0.780926		1.29375	1.04259
	0.940086	0.687982		1.22193	1.01831
	1.01977	0.863834		1.12732	1.17012
	1.07864	1.04874		1.0194	0.958895
	0.997433	0.813762		1.28065	1.36775
	1.18194	0.876388		0.905184	0.81159
	1.00426	0.913275		1.38644	1.53557
	1.03839	1.10009		1.17253	0.788573
	0.909631	1.08268		1.47085	1.27809
	0.85279	0.832812		1.01671	0.908277
	0.89293	0.931713		0.926364	0.935157
	0.803603	0.812404		1.39833	1.36209
	0.89756	0.719386		1.19838	1.29081
	0.916265	0.912217		1.18637	1.16353
	0.965416	0.934187		1.12375	0.984833
	1.06443	0.948226		1.08925	1.14664
	0.866603	0.967686		1.02342	0.981632
	1.17349	1.26054		1.13308	1.21182
	0.955032	0.844424		0.858975	0.750228
	0.901361	0.80188		0.913067	0.806973
	0.950249	1.00686		0.96789	0.745827
	1.16701	1.18341		0.971947	0.866014
	0.980554	0.8441		1.29067	1.28785
	0.835636	1.07033		1.08275	0.916539
	1.03794	1.11789		1.08495	0.988464
	1.07818	1.09729		1.09329	1.04087
	0.857031	0.81778		1.45705	1.28326
	0.892426	0.882642		1.07457	1.1907
	1.06536	1.0057		1.13785	1.18577
	1.36081	1.4307		1.11877	1.18819
	0.823875	0.756768		1.22626	1.19725
	1.12586	1.20218		1.06859	1.04957
	0.921778	0.942509		1.18415	1.21362
	0.841774	0.828131		1.15948	1.16757
	0.901954	0.932958		0.860164	0.648026
	1.03108	1.07108		1.08272	1.11623
	0.910872	0.989846		1.0941	0.990798
	1.07368	1.18922		0.999003	0.753414
	1.0819	1.09311		0.997435	0.940684
	0.960682	1.06391		0.902002	0.902698
	0.926446	0.846574		0.863423	0.844204
	0.871852	0.719886		0.896515	0.997643
	0.987875	0.964044		0.746857	0.697513
	1.14757	1.22963		1.04359	1.06631
	1.25563	1.25561		0.822981	0.782602
	0.814846	0.75182		0.947302	0.818948
	0.995755	1.23413		0.983583	0.882587
	1.05327	1.05228		0.903369	0.907408
	1.48532	1.38582		1.15822	1.21123
	0.984551	1.004		0.974781	1.23422
	1.07791	1.17893		0.848286	0.496223
	0.880235	0.891522		1.29511	1.3169
	1.04302	0.982686		1.13128	1.45264
	1.16928	1.14576		1.28579	1.24532
	0.931892	0.599231		1.44864	1.55749
	1.03922	1.099		1.74164	1.80413
	0.945125	1.06014		1.53666	1.56473
	1.19606	1.22728		1.97492	1.51242
	1.07168	1.11629		1.73767	1.77225
	1.18455	1.27941		1.74526	1.62659
	1.08861	1.16654		1.25528	1.23109
	0.865934	0.699608		1.49064	1.16235
	0.973973	0.756895		1.19037	1.23842
	1.29444	1.41619		1.14826	0.654608
	0.869073	0.933744		1.33186	1.47247
	0.929455	0.981745		1.79894	1.64743
	0.797068	0.793446		1.1874	1.28388
	0.895265	1.01107		1.51805	1.49917
	1.10377	1.14715		1.48824	1.43565
	1.14747	1.31564		1.78562	1.53137
	0.842536	0.865864		1.9555	1.9303
	1.10654	1.14937		1.62447	1.61446
	0.939554	0.370354		1.07336	0.99382
	0.915975	0.964167		1.1638	0.768379
	0.813716	0.774731		1.39606	1.31857
	0.755623	0.726359		1.24334	1.31287
	1.19648	1.1493		1.31385	1.11847
	1.0671	1.0947		0.869387	0.642408
	0.958559	1.03483		1.59082	1.60236
	0.891628	0.868441		0.893971	0.79537
	0.941395	0.996951		0.745189	0.452577
	0.955285	0.902662		1.04804	0.78241
	0.780176	0.828597		1.34548	1.01554
	1.01804	1.0324		1.53813	1.45522
	0.8704	0.832951		1.35606	1.2278
	1.22677	1.30614
	1.11126	1.03064
	1.24649	1.16639
