# Supplementary material for: A DARPin-based molecular toolset to probe gephyrin and inhibitory synapse biology
Source: eLife journal article supplement (doi:10.7554/elife.80895), 2022-10-31
Supplement: supp [file elife-80895-supp-v1.zip › elife_poa_e80895_Figure_3_source_data_2.xlsx]

## Sheet: Panel
	Example Ab7a to 27G2 intensity ratios for 6 neurons showing different distributions
	1	2	3	4	5	6
	0.630889	0.647393	0.684588	1.09091	0.755263	1.19853
	0.505077	0.584029	0.876246	1.00918	1.05488	1.23456
	0.626586	0.745845	0.954476	0.959173	0.181204	0.481878
	0.099862	0.977226	0.573014	0.982061	1.62866	1.13155
	0.597039	0.835988	0.769637	1.06259	1.24396	0.994331
	0.477028	0.688616	0.478438	1.29184	0.60337	1.29125
	0.691613	0.975806	0.78454	0.799215	1.16981	0.248776
	0.470738	0.777295	0.914966	1.01171	0.367683	1.48846
	0.557756	0.682882	0.629439	0.736589	0.53915	0.528424
	0.644868	0.500324	0.865179	0.911592	1.33401	1.62517
	0.538126	0.59671	0.767781	0.603367	1.31407	0.780482
	0.545144	0.671574	0.837364	0.980154	0.633073	1.2988
	0.7725	0.99075	0.534875	0.77307	0.755672	1.25829
	0.386704	0.749	0.830351	1.00798	1.38871	1.19953
	0.692547	0.540242	0.627973	1.01348	0.518255	0.84232
	0.473879	0.954593	0.733302	1.03947	2.28717	0.859702
	0.649818	0.66148	0.942984	0.976479	1.59073	0.97202
	0.729747	0.748283	0.88255	0.755001	0.452651	1.00429
	0.50427	0.902222	0.745899	0.903121	0.756974	0.973403
	0.625488	0.948786	0.615123	0.991199	0.031095	1.31518
	0.643708	0.927495	0.676286	1.03932	1.73334	0.805556
	0.648818	0.832337	0.113848	0.836885	0.839005	0.405378
	0.374099	0.583176	0.757647	1.12085	0.850323	0.606994
	0.556869	0.470918	1.06948	1.06456	0.6348	1.31512
	0.650193	0.645322	0.910467	1.06385	0.097167	1.22793
	0.653169	0.595997	0.775326	0.795342	0.687654	1.11172
	0.685233	1.0709	0.920684	0.774179	0.173946	0.444348
	0.636655	0.606073	0.995732	0.95664	0.570288	1.11712
	0.688867	0.668378	0.952329	0.735592	1.27386	1.10089
	0.576629	0.764586	0.704277	1.34074	1.0655	1.0663
	0.829051	0.755854	0.716728	0.657382	1.02315	0.898239
	0.532331	0.742367	0.611711	1.26198	0.914148	1.11196
	0.457353	0.922567	0.814326	1.09293	0.117847	1.09781
	0.702	0.663189	0.685788	0.796013	0.632621	1.10195
	0.699382	0.755872	0.878176	0.66194	1.04748	0.02735
	0.834704	0.811878	0.747814	0.81668	0.850943	0.183235
	0.499465	0.817043	0.9777	0.869936	1.22719	1.22584
	0.760678	0.928188	0.834932	0.892448	1.40037	0.863442
	0.143705	0.906231	0.725982	0.656995	1.07431	0.281152
	0.742086	0.929753	0.890844	0.863346	1.38781	1.39123
	0.418045	0.744107	0.975631	1.13304	1.49713	0.7882
	0.664097	0.649411	0.855023	0.788757	0.90652	0.861878
	0.613417	0.694317	0.848124	0.701153	0.936234	0.90525
	0.821772	0.865125	0.748887	0.955981	0.813759	1.06019
	0.649261	0.697753	0.620832	0.997185	1.60037	0.301418
	0.43983	0.656839	0.590064	1.42525	0.984659	1.13553
	0.709671	0.709126	0.673679	1.0585	1.02309	0.752074
	0.708836	0.83317	0.905895	0.990036	1.47031	0.871141
	0.671993	0.698712	0.900878	0.520222	1.21044	0.578304
	0.647213	0.736918	0.542842	0.107379	0.876872	1.01667
	0.667946	0.885917	0.700536	0.803431	1.06664	0.759298
	0.53352	0.619926	0.128689	1.15196	1.28196	1.03274
	0.581799	0.67082	1.0538	0.819473	0.975577	0.537562
	0.554257	0.834989	0.575952	0.804595	0.564558	0.330771
	0.568688	0.900861	0.843489	0.839677	0.991267	0.161084
	0.756337	0.574101	0.636265	0.138098	1.15632	1.38751
	0.650522	0.700654	0.805808	1.29402	0.890717	0.550177
	0.510567	0.965083	0.128344	0.675059	0.872586	0.956212
	0.530084	0.651497	0.917303	0.996903	1.5599	0.987304
	0.514212	0.911974	1.02115	0.812587	1.20619	0.134693
	0.481034	0.787986	0.69234	0.88347	1.13039	1.27457
	0.770836	0.623226	0.919122	0.805693	1.1102	1.335
	0.539398	0.412596	0.810654	0.87589	1.40024	0.791921
	0.740341	0.804901	0.183561	1.04251	1.0806	1.41592
	0.893253	0.184909	0.907138	0.886844	1.37994	1.23569
	0.55416	0.610363	0.950891	1.2621	1.2578	0.977453
	0.448043	0.704178	0.846236	0.812142	1.65204	0.441072
	0.486458	0.663127	0.81523	0.73195	1.59812	1.328
	0.637782	0.569	0.664246	0.783944	1.18395	1.41819
	0.028853	0.692517	1.01051	1.0116	1.43641	1.31265
	0.514092	0.563616	0.153801	1.07198	1.15206	0.745761
	0.525395	0.701865	1.14602	0.962494	1.70969	1.07607
	0.743244	0.669999	0.834293	0.943279	0.499946	1.31308
	0.727761	0.764127	0.031067	0.732179	0.607201	0.036912
	0.498272	0.824158	0.525314	1.10551	0.833096	0.307962
	0.711436	0.805698	0.641098	0.590736	0.020421	0.926712
	0.572091	0.984004	0.891714	0.743325	0.482439	1.17317
	0.544919	0.488658	0.73825	0.037768	0.945946	1.20793
	0.364299	0.808175	0.023679	1.13606	0.69484	1.21759
	0.658144	0.591403	0.578531	0.933584	1.38922	1.24341
	0.743148	0.50493	0.854992	0.904434	1.18345	0.807918
	0.46909	0.657363	0.755018	0.85481	1.64897	1.42191
	0.698658	0.854698	0.652843	1.15023	0.521496	0.956065
	0.498035	0.84265	0.915631	1.05708	0.016092	0.875782
	0.696579	0.614959	0.890767	0.731331	1.56778	1.6591
	0.586825	0.702398	0.678066	0.984376	0.749038	1.27887
	0.489089	0.82921	1.00527	0.714048	1.57049	0.744136
	0.68796	0.945993	0.066022	0.878033	1.19946	0.883169
	0.674729	0.806618	0.922195	0.047634	1.31653	0.99863
	0.667484	0.655575	0.678756	0.864151	1.57737	1.32416
	0.745245	0.900281	0.100391	0.818933	1.0804	0.332136
	0.666703	0.719211	0.064721	0.958866		0.937877
	0.385635	0.879409	1.02048	1.06264		1.159
	0.700911	0.720438	1.01189	0.728539		0.183298
	0.577315	0.668051	1.14043	0.980834		1.50517
	0.640444	0.763807	0.931734	0.995016		1.46871
	0.642232	0.900112	0.863345	0.723571		1.20688
	0.708978	0.733258	0.741884	0.660329		0.974836
	0.639753	0.909105	0.829869	0.833101		0.977005
	0.806945	0.695569	0.609237	0.798845		0.612808
	0.601473	0.654119	0.819702	0.856664		1.42473
	0.715006	0.764135	0.918724	0.750895		0.029399
	0.74895	0.650283	0.569155	1.06271		1.12547
	0.725334	0.387795	0.750792	0.642467		1.07442
	0.891897	0.449395	0.048219	0.93213		1.37815
	0.016435	0.835812	1.03798			1.25864
	0.71975	0.595626	0.061847			1.40629
	0.695194	0.787158	0.84111			1.61717
	0.727585	0.731671	0.935489			1.0756
	0.70125	0.848754	0.627264			1.31711
	0.539142	0.708636	0.86059			0.801988
	0.594344	0.568949	1.05207			1.17981
	0.722447	0.695161	0.857562			0.909743
	0.889696	0.799831	1.00271			0.827284
	0.826224	0.73142	0.685367			0.753703
	0.658164	0.662452	0.811081			1.40365
	0.713919	0.575021	0.164822			1.43861
	0.534774	0.852791	0.557379			1.24606
	0.702019	0.76784	0.894237			0.798608
	0.840376	0.771787	0.810916			1.09066
	0.789904	0.810438	0.989795			0.98022
	0.745325	0.538025	0.956672			1.20972
	0.686047	0.719787	0.733764			0.997743
	0.768479	0.828686	0.906561			0.938421
	0.671646	0.573482	1.01432			1.32076
	0.49405	0.806959	1.47805			0.983846
	0.647706	0.838125	0.094687			0.515999
	0.578539	1.0638	0.84056			1.23322
	0.699689	0.740251	0.728263			0.713758
	0.545664	0.62443	0.094738			0.510799
	0.365552	0.522003	0.599267			0.977136
	0.588753	0.488984	0.810746			1.14602
	0.810042	0.505433	0.917731			1.13206
	0.53688	0.858662	0.726307			0.212969
	0.797749	0.698437	0.943265			0.040905
	0.817705	0.387228	0.435026			0.044374
	0.764784	0.674308	0.674344			1.5033
	0.763618	0.642766	0.745593			1.20221
	0.846134	0.488356	0.696047			0.043071
	0.691106	0.531722	0.671639			1.45526
	0.624604	0.6875	0.574835			1.71673
	0.793385	0.595405	0.142756			1.24795
	0.760691	0.625738	0.388433			0.714961
	0.80802	0.498471	0.462582			1.10156
	0.910959	0.514011	0.348472			0.974982
	0.639389	0.931536	0.599021			1.23241
	0.722054	0.540923	0.406008			0.981059
	0.540725	0.560004	0.756088			1.31327
	0.826679	0.779719	0.076788			0.016991
	0.778352	0.586274	0.762969			1.67692
	0.582377	0.767172	0.484423			1.46865
	0.729266	0.549147	0.581686			1.06107
	0.605291	0.573326	0.100078			1.56136
	0.621095	0.79156	0.178637			1.39025
	0.749991	0.705671	0.948522			1.19124
	0.667051	0.776383	0.121476			1.35026
	0.593373	0.695457	0.638035			1.05299
	0.635406	0.51554	0.580725			0.024218
	0.94154	0.83782	0.10543			1.45391
	0.764367	0.381192	0.472622			1.18459
	0.496183	0.469183	0.775354			0.874063
	0.837969	0.581885	0.854672			1.30579
	0.810373	0.65892	1.0504			1.00294
	0.561604	0.544348	0.474236			0.920491
	0.790856	0.478709	0.719778			0.934747
		0.644384	0.17904			1.07209
		0.804722	0.575658			1.0025
		0.505165	0.645991			1.72578
		0.570672	0.701162			1.10328
		0.696883	0.081274			1.18463
		0.686845	0.568567			0.99034
		0.70848	0.156051			1.07708
		0.561691	0.125346			0.010751
		0.818383				1.91135
		0.74758				1.21924
		0.505256				1.67236
						1.47698
						1.28473
						1.20508
						1.19127
						1.05276
						1.32844
						1.28969
						1.44999
						1.31654
						1.28324
						1.24639
						1.3439
						1.37898
						1.05254
						0.138333
