# Supplementary material for: A DARPin-based molecular toolset to probe gephyrin and inhibitory synapse biology
Source: eLife journal article supplement (doi:10.7554/elife.80895), 2022-10-31
Supplement: supp [file elife-80895-supp-v1.zip › elife_poa_e80895_Figure_4_source_data_1.xlsx]

## Sheet: Panel B + C
	Panel B: Distribtion of relative p270 signal within different hippocampal layers in the CA1 area
	Pooled relative pS270 signal pooled within individuals					Median relative pS270 signal					Statistical Analysis
	Oriens	Pyramidale	Radiatum	S.L.M.		Averaged by individual					Repeated measures ANOVA summary
	0.858669	1.00522	0.823216	1.0525		Oriens	Pyramidale	Radiatum	S.L.M.		Assume sphericity?	No
	0.989556	1.11989	0.849965	0.999136		1.05875	0.959925	0.938892	1.04243		F	24.95
	0.990617	0.737652	0.835524	1.06455		1.05476	0.974162	0.959039	1.01204		P value	0.0001
	0.931932	0.489606	0.81829	0.984954		1.0224	0.972151	0.977575	1.02788		P value summary	***
	1.03583	1.04418	0.975054	1.04537		1.03282	0.967708	0.978749	1.02073		Statistically significant (P < 0.05)?	Yes
	0.897762	0.778837	0.806799	0.920669		1.03751	0.971058	0.985887	1.00555		Geisser-Greenhouse's epsilon	0.6727
	1.05539	0.967314	0.810153	1.20779		1.01429	0.955718	0.979786	1.0502		R square	0.8331
	0.767912	0.981937	0.836819	0.858238
	1.26751	0.777002	0.818026	1.0192							Was the matching effective?
	1.00354	0.933401	0.833053	1.02641							F	2.051e-10
	0.971067	0.816009	0.826718	1.19277							P value	>0,9999
	1.03066	0.734216	0.827033	1.05878							P value summary	ns
	1.25604	0.689809	0.841878	1.16828							Is there significant matching (P < 0.05)?	No
	1.08309	0.88125	0.796114	1.05874							R square	1.141e-11
	1.20778	1.10957	0.814885	1.06901
	0.909852	0.937022	0.821834	0.982393							ANOVA table	SS	DF	MS	F (DFn, DFd)	P value
	0.994528	0.950486	0.825743	0.921664							Treatment (between columns)	0.02433	3	0.008111	F (2,018, 10,09) = 24,95	P=0,0001
	1.13248	1.06329	0.787892	1.15316							Individual (between rows)	3.333e-13	5	6.667e-14	F (5, 15) = 2,051e-010	P>0,9999
	0.98721	1.05961	0.775301	1.17683							Residual (random)	0.004876	15	0.0003251
	0.955178	0.917388	0.821143	0.863479							Total	0.02921	23
	0.949669	0.727697	0.789766	1.23787
	0.901535	1.04666	0.844207	1.12604							Data summary
	1.27165	0.789301	0.818419	0.90294							Number of treatments (columns)	4
	0.974393	1.08461	0.805509	1.06638							Number of subjects (rows)	6
	0.854785	0.999936	0.80471	0.989042							Number of missing values	0
	0.997689	0.885201	0.86049	1.0385
	1.33636	0.87579	0.825685	0.943746							Number of families	1
	1.26897	0.887732	0.86092	0.930195							Number of comparisons per family	6
	0.944083	0.939094	0.849154	0.936656							Alpha	0.05
	0.974074	0.76909	0.809593	1.15265
	0.988622	0.800772	0.895192	1.21332							Tukey's multiple comparisons test	Mean Diff,	95,00% CI of diff,	Significant?	Summary	Adjusted P Value
	1.34419	1.05065	0.850717	0.976409							Oriens vs. Pyramidale	0.06997	0,04387 to 0,09606	Yes	***	0.0007	A-B
	0.899048	1.03912	0.850706	1.09543							Oriens vs. Radiatum	0.06677	0,01649 to 0,1170	Yes	*	0.0165	A-C
	1.06811	0.865749	0.805078	0.956818							Oriens vs. S.L.M.	0.01028	-0,03203 to 0,05260	No	ns	0.8076	A-D
	1.16616	1.05573	0.801699	0.976868							Pyramidale vs. Radiatum	-0.003201	-0,02981 to 0,02341	No	ns	0.968	B-C
	1.09739	0.928335	0.981885	1.17535							Pyramidale vs. S.L.M.	-0.05968	-0,09598 to -0,02339	Yes	**	0.0066	B-D
	0.894113	0.772827	0.810043	1.02718							Radiatum vs. S.L.M.	-0.05648	-0,09922 to -0,01374	Yes	*	0.0168	C-D
	0.882636	0.626631	0.869073	1.00715
	0.921288	0.768481	0.810053	1.16725							Test details	Mean 1	Mean 2	Mean Diff,	SE of diff,	n1	n2	q	DF
	0.863821	0.808542	0.804418	1.08673							Oriens vs. Pyramidale	1.037	0.9668	0.06997	0.007072	6	6	13.99	5
	1.19687	0.987437	0.842813	1.10119							Oriens vs. Radiatum	1.037	0.97	0.06677	0.01363	6	6	6.93	5
	1.15615	0.916593	0.80739	1.04763							Oriens vs. S.L.M.	1.037	1.026	0.01028	0.01147	6	6	1.268	5
	1.32871	0.999456	0.81845	0.969465							Pyramidale vs. Radiatum	0.9668	0.97	-0.003201	0.007211	6	6	0.6277	5
	0.921123	0.873285	0.79665	1.02777							Pyramidale vs. S.L.M.	0.9668	1.026	-0.05968	0.009836	6	6	8.581	5
	1.08215	1.21848	0.816993	1.18307							Radiatum vs. S.L.M.	0.97	1.026	-0.05648	0.01158	6	6	6.896	5
	1.22248	1.07328	0.8295	1.11959
	0.97811	0.767757	0.827487	1.15632
	0.989685	0.97963	0.852846	1.07836
	1.0271	0.969096	0.880985	1.15711
	1.26482	0.929189	0.810123	1.07226
	1.21475	1.0693	0.794137	1.05038
	1.23415	0.490455	0.867694	1.15386
	1.13949	0.870972	0.861688	0.94481
	1.07366	1.25521	0.830747	1.09867
	1.36401	0.750387	0.807795	1.09627
	1.28198	0.968417	0.784088	1.04785
	1.24118	0.93754	0.856765	0.98082
	0.709204	0.811161	0.819325	1.12067
	1.16649	0.749347	0.802185	0.979806
	1.08963	0.767549	0.797753	0.937414
	0.87463	0.903059	0.784657	1.18714
	1.15377	1.03753	0.829915	0.939167
	1.12712	0.9599	0.80208	1.11685
	0.741495	0.804813	0.824261	1.15265
	1.41237	0.660154	0.7989	1.28471
	0.616711	0.991886	0.818545	1.0202
	1.35145	0.987971	0.804882	0.983894
	1.04607	0.648005	0.823335	1.16784
	1.2685	0.746669	0.822233	1.08059
	1.2921	0.775763	0.826535	1.01129
	0.91391	0.801983	0.800509	1.03565
	1.33777	0.88618	0.780258	1.15574
	1.4235	0.963095	0.904388	1.13401
	1.22117	0.777062	0.72708	0.939512
	1.01782	0.704023	0.807515	0.927579
	0.93375	0.952237	0.82371	1.17906
	1.22148	1.27897	0.828629	1.21833
	1.01083	0.810854	0.836029	1.13618
	1.35899	0.986047	0.82034	0.978621
	1.2294	0.888738	0.870729	1.06342
	1.07628	0.953891	0.799697	1.15249
	1.06534	0.722641	0.816469	1.00311
	1.24673	1.36968	0.818811	1.17285
	1.30819	0.897807	0.818896	1.03993
	1.009	0.850969	0.800225	0.870354
	1.00838	0.750662	0.809853	1.04262
	1.23414	0.68946	0.794253	0.91232
	0.896497	1.17602	0.825241	0.914323
	1.02571	1.07583	0.799842	1.04538
	1.10314	0.756399	0.837311	0.851194
	0.86725	0.928575	0.815813	1.04409
	1.09398	0.890184	0.827069	1.07895
	1.14217	0.813668	0.856337	1.09451
	1.10114	1.04042	0.783392	1.11316
	1.24871	0.842248	0.840158	1.02892
	1.21691	0.872683	0.823506	1.09866
	0.888457	0.920865	0.820462	1.01383
	1.07334	0.739194	0.825213	1.11785
	1.10143	0.860312	0.796437	1.11969
	0.911283	0.832262	0.79373	0.846339
	0.985635	0.728908	0.813687	1.23239
	0.908652	0.89112	0.792462	1.04302
	1.08258	0.926003	0.832003	0.903717
	1.13294	1.04958	0.808994	0.947986
	0.875406	0.985893	0.818878	1.13077
	1.0406	0.924132	0.890619	1.03674
	1.43079	0.986017	0.750989	1.00466
	1.11657	0.951166	0.811389	1.10383
	1.1278	0.821495	0.826028	1.10067
	1.48823	0.955077	0.821466	0.965551
	1.13133	0.936065	0.821475	0.999743
	1.0841	0.852143	0.804213	0.901676
	0.802813	0.745576	0.78175	0.905927
	0.962324	0.718515	0.809973	1.12095
	1.26099	0.773936	0.829365	1.02154
	1.07007	0.899699	0.807574	1.18312
	1.08373	0.875857	0.806087	1.06521
	1.13494	0.930237	0.800163	0.882864
	1.13634	0.95243	0.825524	0.94265
	1.16709	0.753339	0.808636	1.19372
	1.05183	1.06896	0.810506	0.982844
	0.883048	1.09798	0.816069	1.115
	1.07917	0.877194	0.825988	0.887797
	1.19817	0.891985	0.83613	1.04116
	1.02619	0.915221	0.829231	0.954477
	1.16755	1.09075	0.80296	1.07065
	1.35149	0.724583	0.817224	0.971579
	1.03601	0.770326	0.827722	0.989566
	1.1061	1.03694	0.837571	1.03941
	0.979304	0.872066	0.788185	1.14829
	1.084	0.980057	0.822271	0.957506
	0.7133	0.863889	0.800249	0.986299
	1.21944	0.646755	0.808741	1.07617
	0.917483	0.729786	0.818726	1.11862
	0.933051	1.00025	0.805026	1.12927
	0.977737	1.02635	0.804619	1.05226
	0.869589	0.720414	0.899037	0.942516
	1.08202	0.844829	0.827909	1.04867
	0.927502	0.941673	0.816406	1.04594
	0.958452	0.872613	0.833101	1.08006
	0.836595	0.849103	0.845981	1.03126
	1.12839	1.09356	0.809903	1.14421
	0.954584	0.912795	0.84063	0.941347
	1.49336	0.988923	0.82889	1.04362
	1.27567	0.744691	0.798686	1.06473
	1.06479	0.913304	0.802003	0.918742
	1.25849	1.04568	0.832872	1.02963
	0.998318	0.986263	0.820109	1.09503
	0.886841	0.766897	0.831113	1.01707
	1.10669	1.06367	0.789496	1.01208
	1.18497	1.12535	0.837989	1.04859
	0.960713	0.957713	0.805806	1.03548
	1.32698	0.704931	0.775951	1.12075
	1.16291	0.904227	0.818323	0.999181
	1.22165	0.790875	0.810684	1.12538
	0.874715	0.887504	0.795502	0.90714
	1.0027	0.692002	0.790591	1.11755
	1.05649	0.871312	0.816663	1.02659
	0.968208	1.00246	0.789989	1.1647
	1.13755	0.813023	0.835213	1.18179
	1.22518	0.883111	0.789187	1.04841
	1.21253	1.08729	0.814947	1.00474
	0.981353	0.99423	0.827667	1.06707
	0.98782	1.0894	0.8163	1.05729
	1.12432	1.07902	0.834979	1.04955
	1.36374	1.10554	0.779792	1.11963
	0.9972	0.859941	0.811793	1.04347
	0.776832	0.956575	0.793234	1.04622
	1.07569	1.00295	0.794903	0.92642
	1.12292	1.06015	0.774807	0.945595
	1.02977	0.855637	0.799887	1.12345
	1.0664	0.899109	0.798594	1.13082
	0.888139	0.924423	0.781756	1.0433
	0.929058	1.01252	0.813809	1.14128
	0.964165	0.897356	0.825532	1.07054
	0.94297	0.899035	0.859185	1.1996
	0.999008	0.743142	0.796109	1.02975
	1.09849	0.720265	0.831392	1.12602
	0.410953	0.910696	0.830082	0.988795
	1.17631	1.14051	0.81358	1.01562
	1.04201	1.00888	0.824658	0.983436
	1.04995	0.986496	0.840921	1.09217
	0.908944	1.04641	0.839038	1.04608
	1.07124	1.06141	0.881713	1.17972
	1.05138	0.961747	0.796075	0.92559
	1.05809	1.00538	0.829744	1.14339
	1.26584	0.87726	0.827272	0.993657
	0.870641	0.927699	0.814765	0.945638
	0.97823	0.937055	0.777624	1.07438
	1.0927	0.854987	0.86087	0.992674
	1.44488	0.952086	0.835174	1.14501
	0.948632	0.999919	0.793562	1.0412
	0.974051	0.919715	0.830766	1.12557
	0.881377	0.850488	0.806218	1.06471
	0.987174	0.779904	0.84348	0.951129
	1.20009	0.919445	0.792503	1.0408
	0.955334	0.83765	0.800245	1.11515
	1.34309	1.00856	0.818025	1.05402
	1.19284	0.987672	0.809249	0.930904
	1.23335	0.702653	0.845236	1.07668
	1.44616	1.03279	0.801192	0.953736
	1.13768	1.00199	0.781278	0.974832
	1.08773	0.754193	0.829889	1.09803
	1.02474	0.720874	0.794553	0.966893
	0.927923	0.987841	0.814528	0.926975
	0.999962	0.905088	0.802672	0.89136
	1.06616	0.960045	0.831865	1.12783
	1.09007	0.992304	0.817094	0.995076
	0.881359	0.732836	0.777663	1.02736
	1.19862	0.938989	0.756961	1.1499
	0.710802	1.05745	0.796793	0.932146
	1.04499	0.746273	0.805043	1.05127
	0.79982	0.92242	0.806476	1.19566
	0.977661	0.952276	0.817357	0.949997
	1.05257	0.706939	0.863055	1.03866
	0.910306	0.920291	0.841955	1.14166
	1.01527	1.00722	0.869271	1.24103
	0.976548	0.715931	0.805759	0.872995
	1.06403	0.91547	0.814802	1.10869
	1.25393	0.769163	0.823138	1.00785
	0.890214	0.85793	0.812892	1.07657
	1.03907	0.881329	0.811655	1.07315
	1.10804	0.986666	0.801986	0.912038
	1.00321	0.676596	0.825211	0.888838
	1.24648	1.05301	0.826933	1.05086
	1.08475	0.802657	0.794908	1.12677
	1.17807	0.724565	0.815439	1.09471
	1.06528	0.944139	0.787963	0.984443
	1.18064	0.76285	0.818549	0.94023
	1.42037	0.788937	0.804749	1.13168
	1.33937	0.40899	0.821498	1.11639
	1.11605	0.756425	0.837353	1.07946
	1.44576	0.932834	0.817395	1.10282
	1.09213	0.903643	0.879852	0.949354
	1.05204	0.682906	0.830753	1.12036
	1.028	0.894269	0.821847	1.05586
	1.25299	0.849306	0.809169	0.921045
	1.01452	0.907496	0.845498	1.0379
	0.921969	0.784088	0.863989	1.10153
	1.00928	0.745722	0.896301	1.04838
	0.951986	0.6818	0.850406	1.03839
	0.925546	0.74689	0.803044	1.07943
	1.21285	0.856067	0.8082	1.15858
	1.13043	0.684082	0.805809	0.915018
	0.997607	0.896101	0.976853	1.06951
	0.92565	1.03074	0.811316	0.925354
	1.376	1.00895	0.800029	0.994916
	1.28181	0.439899	0.81456	1.01722
	1.01889	0.916057	0.840604	1.20224
	1.46104	0.839242	0.845508	1.10532
	0.969496	0.89638	0.788401	0.989427
	0.984063	0.88344	0.833029	1.09841
	1.16086	1.04803	0.788265	1.0738
	0.966529	0.880615	0.788077	1.06753
	1.40624	0.951764	0.822547	1.00469
	1.00761	0.755185	0.859201	0.927981
	0.924983	0.84046	0.801248	0.938891
	1.09363	0.954662	0.880169	1.02037
	0.93974	1.10443	0.836742	1.14758
	0.657205	1.08119	0.763543	1.14619
	0.901191	0.979493	0.810401	0.871256
	0.923485	0.744408	0.816144	1.04635
	1.02573	0.669026	0.829126	0.945857
	1.06027	0.936354	0.811883	1.03862
	1.04841	0.896709	0.807734	1.03044
	1.11693	0.68964	0.818168	1.05504
	1.08032	0.808376	0.815433	1.09525
	1.06328	0.978694	0.805639	1.01555
	0.819023	0.839132	0.823538	0.914173
	0.976301	1.08516	0.831109	0.931045
	1.07783	0.725401	0.79253	0.939484
	0.959964	1.11047	0.804402	1.14867
	1.23316	1.01081	0.877978	0.997981
	1.08877	0.729362	0.823375	0.999394
	1.08918	0.805638	0.826203	1.03807
	1.16157	1.17038	0.854494	0.980327
	0.671778	0.75888	0.810354	0.998242
	1.19256	0.998232	0.800461	0.959705
	1.09279	0.944602	0.796845	1.12448
	1.12882	0.843093	0.870507	0.95702
	1.20406	0.910918	0.845455	1.04141
	1.3112	0.679994	0.795359	1.0596
	1.25295	1.09641	0.810129	1.1194
	1.24004	1.02955	0.798822	1.09496
	1.15608	0.775099	0.867897	0.944655
	0.916843	0.866599	0.753498	1.0661
	1.00601	0.920309	0.803059	1.12927
	0.938124	0.872747	0.798507	1.08768
	0.968394	1.1102	0.930443	1.06385
	0.865839	0.954354	0.844085	1.16208
	1.21517	0.720398	0.805758	1.07812
	0.926485	0.989691	0.78531	1.18068
	1.13418	1.14905	0.795212	0.915949
	0.96659	0.953261	0.818503	0.933754
	1.10165	0.725216	0.817454	0.989546
	1.21236	0.938706	0.847678	0.964179
	0.902798	0.961438	0.804704	0.982904
	0.64819	0.777107	0.809614	0.846488
	0.85486	0.774788	0.823449	1.12749
	0.938165	0.983182	0.824799	1.00259
	0.912119	1.00808	0.812384	1.02874
	0.931734	0.904963	0.810328	1.11303
	1.11007	0.958106	0.792026	0.927006
	0.918082	0.726452	0.796403	1.07542
	0.988328	0.899463	0.822499	1.14236
	1.09499	0.858288	0.827896	1.17637
	1.0176	0.746857	0.809133	1.0035
	1.13888	0.940712	0.865224	1.06843
	1.02879	1.04418	0.788044	0.895595
	1.01148	0.82028	0.802434	1.01422
	0.934756	0.760182	0.84298	0.914723
	0.885186	0.885368	0.789311	1.14488
	0.927378	0.790248	0.818832	1.00116
	1.14748	0.857361	0.797209	1.16185
	1.07107	0.717587	0.789169	0.913797
	1.1917	0.700293	0.811482	0.88654
	1.07456	0.971195	0.911815	1.05675
	1.02465	0.85321	0.821978	1.14306
	1.17033	0.855161	0.814918	1.14689
	0.905889	0.804604	0.805609	0.989005
	1.28733	0.950037	0.872753	0.922389
	0.974088	0.937802	0.845694	0.894085
	1.27947	0.959754	0.826679	1.043
	0.867547	0.779051	0.82269	1.04195
	1.29415	0.761402	0.803599	0.912743
	1.03007	1.06636	0.810023	1.02723
	1.34802	1.06984	0.794939	0.850196
	0.994176	1.01902	0.822797	0.976027
	1.04933	0.830032	0.824323	1.07982
	1.19155	0.740569	0.81054	0.992207
	1.02859	0.756805	0.815065	0.896284
	0.922702	0.912488	0.831682	1.0347
	0.914059	0.7233	0.821603	1.03523
	1.03249	1.01737	0.764124	1.05152
	1.05477	0.96923	0.80143	1.15812
	1.1696	0.9526	0.783086	0.913361
	1.10692	0.739599	0.833726	1.20936
	1.11537	0.946292	0.790927	0.97051
	1.08769	1.10888	0.80284	0.893172
	0.919884	0.880119	0.829802	0.965349
	1.12464	0.975925	0.816561	1.0536
	1.03481	0.82295	0.810283	0.940159
	1.03906	0.944303	0.815103	1.09309
	1.06676	0.695955	0.805811	0.94018
	1.10007	0.82602	0.818535	0.995263
	1.16431	1.05458	0.84436	1.09923
	1.11922	0.718653	0.794687	0.999549
	1.05356	0.934947	0.810919	0.733594
	1.05981	0.757354	0.80124	1.04325
	1.14039	0.95107	0.827789	1.10396
	1.06544	0.696679	0.810745	1.0592
	0.987451	0.738902	0.805468	1.15644
	0.989379	0.738361	0.809702	1.08125
	1.21625	0.99343	0.918674	1.09832
	1.14084	0.577778	0.820641	1.14937
	1.31457	0.894593	0.829111	1.14537
	0.951666	0.887441	0.796636	0.969645
	1.03242	1.05441	0.827608	1.02588
	1.01629	0.746485	0.865224	1.04551
	0.999723	0.637676	0.817065	0.983828
	1.16347	0.820673	0.861061	1.06685
	1.04057	0.781297	0.799324	0.98233
	0.910966	0.950221	0.802264	1.0528
	1.00058	0.881289	0.788857	1.07627
	1.34998	0.96314	0.79577	0.92521
	1.29191	0.947801	0.812189	0.971244
	1.1131	0.98967	0.794116	1.12565
	1.18281	0.96634	0.800544	1.01388
	1.04229	0.909483	0.801176	0.889729
	0.975862	0.991239	0.790577	1.11475
	1.03731	1.00764	0.807535	0.960064
	0.961261	0.95521	0.818105	0.923444
	1.31184	1.00119	0.891235	0.993003
	1.13794	0.975576	0.828138	1.07316
	1.14601	0.747107	0.82214	1.18772
	0.995409	0.998285	0.826827	1.18342
	1.06047	0.893175	0.798342	0.914508
	1.06	1.08061	0.816473	1.28617
	1.08113	0.969426	0.763557	1.06891
	1.13488	0.898687	0.805197	0.994462
	1.26778	1.0254	0.767329	0.94046
	0.913438	1.17406	0.792681	1.2827
	0.992996	0.972559	0.804335	1.03526
	1.49537	0.759076	0.863734	0.891318
	1.08268	0.810038	0.797924	1.02614
	1.393	0.948311	0.801647	1.05302
	1.4424	1.20545	0.810223	1.04263
	1.15695	0.838307	0.751664	1.08608
	1.33869	0.95044	0.812955	1.13425
	1.03703	0.761353	0.814193	0.985051
	1.0088	1.03678	0.805866	1.01544
	1.10811	0.752653	0.781106	0.851787
	1.16796	0.93599	0.803285	1.00509
	1.05622	0.918353	0.816912	1.05775
	1.02575	0.803448	1.05707	1.04819
	1.05395	1.01614	0.801317	1.07421
	1.33797	0.860852	0.783094	1.082
	1.05156	0.753281	0.830083	1.15897
	1.15619	0.891895	0.890407	1.09344
	1.26037	0.790963	0.793344	0.981528
	1.1213	0.890895	0.811974	1.04893
	0.981992	0.795086	0.810819	0.960132
	1.20678	0.769529	0.813329	1.08877
	1.06448	0.977311	0.82647	0.886147
	1.07039	0.947108	0.820399	1.13451
	0.895689	0.852582	0.803507	1.09153
	1.08398	1.02513	0.801175	1.09539
	1.26063	0.955372	0.812328	1.0088
	1.07974	0.748193	0.800402	1.00995
	1.06847	0.96456	0.848308	0.962798
	0.692227	0.923734	0.791174	0.905131
	1.23255	1.0786	0.817314	1.09455
	0.867356	0.947134	0.873767	0.960211
	0.948849	0.606312	0.823514	1.03227
	1.00774	0.884754	0.82485	1.17549
	0.994472	0.716904	0.813673	0.939036
	1.21728	0.98037	0.810338	0.96856
	1.20228	0.7999	0.831484	1.02414
	1.10948	0.733823	0.793577	1.05932
	1.15406	1.03359	0.822281	0.92783
	0.896986	0.744849	0.805154	0.986879
	1.41564	0.690469	0.830426	1.08336
	1.27465	0.915935	0.822405	1.04802
	1.22452	0.88298	0.789505	1.10005
	0.89336	0.637881	0.833225	1.01187
	1.05291	0.814867	0.816403	1.0399
	0.700169	1.01559	0.817244	0.946715
	0.95085	1.06887	0.821331	0.987383
	1.30269	0.960243	0.882158	0.942843
	0.998244	0.696414	0.799976	0.98994
	1.00096	0.751793	0.80227	0.982536
	0.911327	0.702302	0.814026	0.965276
	0.927721	0.731939	0.798772	1.12867
	0.889252	0.918253	0.923567	1.22097
	0.72201	0.737952	0.860749	0.98918
	0.975498	0.904527	0.811286	1.03845
	0.92614	0.711956	0.795125	1.0599
	1.11404	0.931815	0.832088	1.10592
	1.23836	0.720498	0.801888	1.01927
	1.01807	0.757907	0.811927	1.10537
	0.994199	0.798807	0.776798	1.15509
	1.06802	0.741094	0.853297	1.10277
	1.35986	0.745748	0.855928	1.17051
	0.934353	0.752574	0.817188	0.879499
	1.10254	0.739548	0.829993	1.18062
	1.2776	0.774753	0.818963	0.909511
	0.98575	0.994327	0.769913	1.16141
	0.892927	0.733782	0.820153	0.902257
	1.02548	0.956185	0.914677	1.27642
	1.16576	0.768554	0.817748	0.99291
	0.853838	0.984392	0.788889	0.879236
	1.21177	0.933054	0.810285	1.05872
	1.03917	0.869425	0.821024	1.05121
	1.1353	0.738133	0.816626	0.327719
	1.06865	1.13981	0.830824	1.02622
	1.13501	0.75813	0.608412	0.882779
	1.11538	0.79446	0.887068	1.14631
	0.888613	1.03053	0.807232	1.18294
	1.22909	0.740838	0.821564	0.992306
	0.958205	0.789955	0.834623	1.08332
	1.03383	0.780009	0.813353	1.23224
	1.15871	0.756285	0.816971	1.11955
	1.16979	0.905392	0.804732	1.06132
	1.29571	0.796741	0.806216	1.05287
	1.07384	1.0822	0.815512	0.960296
	1.01255	0.92697	0.793546	0.989904
	0.795	0.924362	0.808076	1.0056
	1.07306	0.780055	0.780512	0.930014
	1.00362	0.776359	0.836614	0.998824
	0.919667	0.747056	0.843922	1.10069
	1.02085	0.964801	0.812972	1.09041
	1.26389	0.782514	0.858803	0.990533
	1.03332	0.784697	0.810955	1.06249
	1.02498	0.712667	0.803535	0.963956
	0.989641	0.731753	0.825599	1.06985
	1.00821	0.791617	0.82092	1.11648
	0.91244	0.688444	0.796349	1.03766
	1.02945	0.915163	0.813822	1.04923
	1.33634	0.755496	0.810373	0.98115
	0.910113	0.980572	0.827759	1.12073
	1.16026	0.828006	0.794396	0.942497
	1.38091	0.720305	0.822311	0.977021
	1.00196	0.754982	0.818672	1.01485
	1.14467	0.95814	0.830145	1.02689
	0.667262	0.865959	0.792644	1.03031
	1.23103	0.68963	0.815044	1.09412
	0.927272	0.930542	0.805946	1.14402
	1.02681	0.933785	0.787028	1.15551
	1.30843	0.753097	0.816777	1.15344
	1.05422	0.916395	0.759801	1.05378
	0.940013	0.911572	0.799341	1.02461
	1.12384	0.755704	0.798346	1.07019
	1.06468	0.920815	0.848487	1.17342
	1.09745	0.910265	0.77428	0.98242
	1.09165	0.889389	0.810181	0.968946
	1.02085	1.03302	0.801604	0.901318
	1.10436	0.840552	0.7858	1.0987
	1.0486	0.887475	0.807196	0.9866
	0.983837	0.953045	0.818714	1.23763
	1.14891	0.914902	0.86212	0.946247
	1.10591	1.31252	0.813281	0.939325
	0.982649	0.759655	0.792025	1.09372
	0.979001	0.87009	0.822024	0.966129
	0.628443	0.798422	0.78655	0.937072
	0.806827	0.975587	0.810133	1.13806
	1.12198	0.94517	0.826951	1.08124
	0.937713	0.943018	0.808049	0.939029
	0.935344	0.870275	0.793206	0.928277
	1.07804	0.93931	0.788826	1.05904
	0.989621	0.902128	0.802917	1.02945
	1.07605	0.864662	0.792257	0.918911
	1.23401	1.19341	0.819304	1.11842
	1.16737	0.858143	0.817603	0.903353
	0.978245	1.01158	0.818798	1.08155
	0.927968	0.943378	0.831661	1.14935
	1.15825	1.00379	0.781629	1.16633
	1.04969	0.976575	0.810563	0.977578
	1.26739	0.952688	0.816014	1.17053
	0.715646	0.752358	0.828461	1.01807
	1.17764	1.19348	0.833894	1.05687
	1.11119	0.985809	0.787128	0.987407
	1.23764	1.08395	0.803634	1.07522
	1.01973	0.832049	0.840635	0.938185
	1.10411	0.764605	0.813294	1.10274
	1.46328	1.13771	0.806199	1.06186
	1.27991	1.08751	0.84951	1.01208
	0.922962	0.8953	0.898892	1.09746
	0.893608	0.798786	0.81321	0.934025
	1.39445	0.997268	0.812371	1.03849
	1.16506	1.24539	0.843371	1.07809
	1.06903	0.90635	0.806319	1.05818
	1.03005	1.03615	0.833645	1.03032
	1.25594	1.01665	0.788241	1.06828
	1.26102	0.776979	0.819137	0.909302
	1.09504	1.01085	0.793181	1.04075
	1.22205	0.950849	0.992828	1.09173
	1.31851	0.921152	0.830687	1.14245
	1.00517	0.803017	0.781586	1.04021
	1.31635	0.991658	0.807848	1.0904
	1.00738	1.16399	0.798758	1.09928
	0.964866	0.862113	0.87534	1.14253
	1.11262	0.948724	0.854114	1.02425
	1.03723	0.897016	0.821721	0.950547
	0.794251	0.94899	0.831538	0.982942
	0.967758	0.882807	0.798041	1.16035
	0.963872	0.851038	0.801452	1.0493
	0.928195	0.841184	0.787335	0.876499
	1.22179	0.9328	0.838872	0.913701
	1.47468	1.01199	0.788851	0.963725
	1.0049	0.950038	0.799532	0.989957
	0.96783	0.961418	0.802768	0.926085
	0.923072	0.974507	0.822774	1.1093
	0.919767	0.957054	0.828534	1.1225
	0.714576	0.936165	0.827085	0.973494
	1.00104	0.948357	0.811737	1.0719
	0.888438	0.944669	0.85063	0.953919
	1.15548	0.881296	0.815418	1.18025
	1.14317	0.817527	0.912598	0.96394
	0.98777	0.997037	0.811265	0.971403
	1.37576	0.952663	1.02308	0.887553
	1.35615	1.00455	0.845092	1.15273
	1.49185	0.948595	0.815125	0.974017
	1.20819	0.900753	0.848	1.14483
	0.983099	1.057	0.864132	1.0997
	1.13231	1.10341	0.80476	0.900858
	1.05354	0.981384	0.811091	0.963707
	0.96927	0.917355	0.810208	1.17723
	1.0174	0.993455	0.800928	0.875046
	0.999004	0.885225	0.796364	1.14255
	1.14572	0.920348	0.801475	1.0262
	1.00898	0.927355	0.81404	1.10382
	0.990517	0.992375	0.783643	1.02322
	0.908352	0.864516	0.762223	0.939623
	1.11835	0.731249	0.785448	1.01148
	0.826042	1.10416	0.804611	1.14328
	0.972424	0.935172	0.815244	1.16939
	1.14913	1.03112	0.793357	1.11042
	0.858957	0.928964	0.806981	0.829603
	1.14511	0.817872	0.828868	0.979007
	0.83334	1.10362	0.825306	1.02126
	1.04194	0.980182	0.829112	1.10772
	1.13052	0.914175	0.780421	1.07359
	1.27598	0.921285	0.804815	1.01822
	0.948132	0.999859	0.795277	1.01842
	1.02656	1.03932	0.793032	1.05677
	0.94386	0.939423	0.813885	1.01507
	1.06501	0.885182	0.788623	0.904267
	0.884814	0.92203	0.800804	1.11895
	0.938792	1.00384	0.805018	0.972026
	1.17475	0.966546	0.812213	1.08363
	1.09992	0.953987	0.764671	0.905969
	0.962012	0.847736	0.818323	0.998703
	1.0033	1.06347	0.784442	1.07933
	0.938911	1.08201	0.835042	1.11239
	1.11401	0.981513	0.827014	1.09122
	1.06744	1.16694	0.810821	1.14968
	1.02752	1.05927	0.826465	1.06876
	1.06379	0.838472	0.87734	1.27589
	1.0445	0.929672	0.812889	1.1509
	1.0853	0.999996	0.829815	1.08812
	0.921179	1.06206	0.816153	1.18741
	0.972304	0.983785	0.800999	0.948203
	1.1065	1.06184	0.826747	0.941896
	1.12495	0.917799	0.786775	1.00747
	0.70586	0.968421	0.817882	0.860494
	1.30955	0.858924	0.817042	1.07585
	1.05153	0.805665	0.843214	1.02509
	0.896125	1.13298	0.814848	0.982382
	0.952429	0.96782	0.844053	1.00686
	1.00966	1.03115	0.836651	1.19749
	0.897234	1.08561	0.788983	0.969768
	1.01414	0.964904	0.815041	0.99611
	1.0874	0.911898	0.81466	0.981172
	1.09423	0.956061	0.818931	1.03825
	1.01633	0.839368	0.808105	0.976579
	0.996338	0.966244	0.803812	0.996078
	1.05176	0.947364	0.833489	1.06672
	1.12362	1.0569	0.818914	0.937123
	1.04766	0.804557	0.800673	1.1016
	1.06859	1.01594	0.809194	0.96866
	0.985851	1.08875	0.809083	0.997496
	1.09227	0.969726	0.799837	0.925929
	0.995068	1.04881	0.808524	0.909103
	1.20181	0.898918	0.83775	1.15493
	1.07799	0.863596	0.805543	1.0923
	0.962787	0.954872	0.809551	1.01524
	1.13031	1.03663	0.82521	0.954886
	0.768545	0.941483	0.831083	0.946389
	1.00131	0.747667	0.834846	1.14107
	0.98846	0.990739	0.803017	1.06468
	1.02172	0.977118	0.819918	1.08646
	1.10052	1.02408	0.821133	1.1004
	0.986122	0.946309	0.890734	1.00287
	0.708235	0.824323	0.799354	0.983952
	1.1093	1.02915	0.835339	0.987986
	1.02927	0.865822	0.806581	1.06428
	1.07631	1.04327	0.812764	1.07626
	0.945356	0.916493	0.843578	0.962432
	1.0757	0.897226	0.806967	1.03438
	1.11668	0.949192	0.811637	0.974098
	0.966711	0.915424	0.818087	0.959983
	1.14651	0.924384	0.809726	0.991351
	1.0807	0.981233	0.836721	1.01811
	1.02283	1.03513	0.881518	1.162
	1.27075	0.923564	0.805698	1.00864
	0.695022	0.923875	0.803802	1.13785
	0.927437	0.797801	0.797483	1.10729
	0.902384	0.899961	0.787415	1.02024
	1.07523	0.92606	0.789883	1.0471
	0.967203	0.857739	0.791416	0.923038
	1.24406	0.643554	0.798923	1.00773
	1.20359	0.974955	0.819361	0.999046
	1.1394	0.885229	0.81607	1.07923
	1.01286	0.90558	0.819246	1.2036
	0.975827	0.795011	0.781023	0.976995
	0.804017	0.912304	0.810568	0.949449
	1.16413	0.935099	0.804429	0.958628
	0.903928	0.991354	0.860636	1.08971
	0.962233	0.972122	0.807263	1.06529
	0.969011	1.04419	0.813667	1.07262
	1.21356	0.97236	0.852046	0.997471
	1.07127	1.03593	0.823036	1.15765
	1.0111	0.834586	0.801171	1.14315
	1.17089	1.01727	0.782627	1.21114
	1.1098	1.00806	0.815039	1.12422
	1.06594	0.854458	0.791877	1.14297
	0.874765	0.925868	0.782675	1.03394
	1.31204	0.983582	0.809731	0.924294
	1.04371	0.945142	0.871454	1.02014
	0.923183	0.959041	0.79457	0.903712
	1.04772	0.969341	0.820996	1.03758
	0.900783	0.9963	0.802703	0.87534
	1.01566	0.810562	0.786916	1.05281
	1.06527	0.883832	0.907691	1.15272
	1.24805	0.875337	0.812969	1.12748
	0.829094	0.885899	0.802923	0.96526
	1.15595	1.03615	0.819729	1.04234
	0.866937	0.999272	0.809355	1.02976
	1.06644	1.01048	0.804196	1.19807
	1.01549	1.03266	0.797245	0.957874
	0.982451	0.859048	0.821717	0.972636
	1.11572	0.99598	0.813137	0.973695
	0.908945	0.925838	0.806566	0.943514
	0.961414	1.0199	0.854622	1.08039
	1.09963	0.777266	0.818675	1.00501
	1.35226	0.959791	0.817626	0.944897
	0.923564	0.782196	0.758253	0.94183
	1.16019	1.02622	0.777912	0.957361
	0.664473	0.941207	0.811918	0.963062
	0.890385	0.971108	0.807682	1.15038
	1.3156	1.09021	0.863239	1.23523
	0.982275	0.783428	0.814915	1.07387
	1.25816	0.987086	0.857807	1.01397
	0.985095	1.01905	0.789451	1.04974
	0.873383	1.00445	0.860432	1.0533
	1.04583	1.04144	0.80884	1.14451
	1.12074	0.881062	0.795843	1.09895
	0.909447	0.97641	0.800733	0.977259
	0.936431	0.91207	0.815241	1.19728
	1.11182	0.864659	0.805253	0.946871
	0.887573	0.725981	0.859721	1.09545
	1.05634	1.02053	0.816221	1.0235
	1.17465	0.816546	0.836806	0.917824
	0.734873	1.01079	0.806412	1.05143
	1.01245	0.766462	0.788495	1.11985
	1.03714	0.896955	0.808516	1.0686
	1.15638	0.963734	0.810789	1.06423
	0.926618	1.07408	0.836048	1.00181
	0.95988	0.772047	0.824517	0.946176
	1.02666	0.710847	0.857126	1.07483
	1.43697	0.738818	0.823471	1.07028
	0.894895	0.971852	0.852171	0.929024
	0.969154	0.865642	0.786813	1.21657
	0.990591	0.989255	0.814072	0.879399
	0.991958	1.00883	0.787545	1.13037
	1.02039	1.03966	0.793598	1.02224
	1.0439	0.95808	0.778099	0.964068
	0.949773	1.01581	0.799313	1.08278
	0.861227	0.964586	0.845462	0.920145
	1.44269	0.770009	0.823866	1.0186
	1.12924	1.0638	0.822552	1.03259
	0.724319	1.00457	0.807156	1.04933
	0.984521	1.1182	0.828536	1.04518
	1.42958	0.902222	0.874193	1.05855
	1.07093	0.978373	0.812271	0.941314
	0.693511	0.961808	0.800361	1.15534
	0.838664	0.998274	0.803121	1.17422
	1.01908	0.933467	0.809999	1.0088
	0.932001	0.942614	0.824882	1.0532
	0.898243	0.95235	0.801007	0.882241
	1.00919	0.933547	0.790371	0.961523
	0.909306	0.884033	0.799443	1.02488
	0.998425	1.08136	0.867642	1.14047
	1.07924	1.01868	0.804158	1.03504
	1.17718	1.02738	0.840562	1.0814
	1.00387	1.21263	0.795966	1.1602
	0.941555	0.976013	0.816447	1.13568
	1.24388	0.996111	0.823279	1.13403
	1.00139	0.933064	0.822614	1.14447
	1.22534	0.965814	0.804019	1.07102
	1.21173	1.12525	0.804184	1.00062
	0.843676	0.915643	0.80913	1.20445
	1.17562	0.95847	0.783213	0.970315
	1.03513	0.979356	0.781424	1.06418
	0.997775	0.975638	0.796033	1.09899
	1.0429	0.997321	0.817772	1.01623
	1.12052	1.09079	0.792212	0.983329
	0.909174	0.905644	0.803023	1.0343
	0.924629	0.885185	0.791822	0.994515
	1.52031	1.01006	0.816236	1.16252
	1.13165	0.92784	0.904931	1.10852
	0.968972	0.937389	0.815743	1.1235
	1.02686	0.851933	0.783141	1.09167
	1.33369	0.934514	0.797319	0.973078
	0.949725	0.906381	0.818273	1.03695
	1.23741	1.03746	0.770078	1.08565
	0.729264	0.930673	0.759891	1.11448
	1.29495	0.983371	0.774452	0.938593
	1.3963	1.02132	0.799367	1.17186
	0.924179	1.0641	0.800745	0.968897
	1.03164	1.12516	0.818739	1.14188
	1.33774	1.09271	0.880107	1.17307
	0.738797	0.665488	0.873692	1.15371
	1.24532	0.989789	0.837576	1.1349
	0.884188	0.954747	0.80775	1.15202
	1.36309	0.977817	0.79226	1.23348
	1.32322	1.03034	0.986971	0.886515
	1.10265	1.02127	0.840949	1.04424
	0.924549	0.996128	0.813918	0.919453
	1.15188	0.901135	0.804755	1.09519
	1.13508	0.926556	0.875886	1.00494
	1.00642	0.855697	0.778413	1.18027
	1.13624	0.960959	0.810832	1.07231
	0.952253	0.976426	0.847216	1.05925
	0.741395	0.934592	0.986228	0.908258
	1.00785	0.817227	0.788974	0.978955
	1.20385	0.978948	0.761446	1.05714
	0.903699	1.03726	0.785328	1.02614
	1.0818	0.92452	0.801993	1.02745
	1.22562	1.05633	0.824569	0.898598
	1.20613	0.961625	0.812533	1.19025
	1.04466	0.937334	0.781545	1.1823
	1.0519	0.992936	0.930182	1.03337
	0.707819	1.05731	0.822162	1.15305
	1.09865	0.940935	0.811813	1.13297
	1.09098	0.937515	0.824555	1.00568
	0.884439	0.946917	0.833061	1.05952
	1.35692	0.909906	0.824924	0.832975
	0.969087	0.990683	0.798944	0.986916
	1.00391	0.974617	0.80146	0.914825
	0.882751	0.751303	0.823691	1.01665
	1.06888	0.983764	0.819704	0.985798
	0.743361	0.996946	0.802526	0.988294
	0.906365	0.909226	0.799632	1.14196
	0.882737	1.09056	0.826562	0.919234
	0.712699	0.928778	0.83011	1.14081
	1.3804	0.978522	0.788691	1.11003
	0.989831	0.953858	0.802208	1.15786
	1.13196	0.911871	0.794209	0.95585
	1.0466	0.975115	0.823438	1.067
	0.983881	0.898487	0.817269	0.924573
	0.931655	0.887454	0.87716	0.954944
	0.910336	0.945751	0.842555	1.1087
	1.24077	1.03819	0.823742	1.00492
	0.989655	0.966552	0.787244	1.29479
	1.04534	0.874459	0.81871	1.02994
	1.17873	0.895521	0.806356	1.16198
	1.04497	1.09766	0.791396	0.914636
	1.03601	0.956799	0.79733	1.04163
	1.08096	0.94889	0.676641	1.2161
	1.07735	0.88003	0.804668	1.14498
	1.10877	0.972181	0.803154	1.17498
	1.11007	1.10601	0.807209	1.1249
	0.936388	0.979552	0.805623	0.940606
	0.999687	0.995784	0.801729	1.11282
	1.068	0.847406	0.835256	0.969751
	0.924846	0.755571	0.786047	1.13582
	1.19572	0.975627	0.804145	1.00387
	1.14356	0.943816	0.900986	1.11675
	1.00834	0.956611	0.833922	0.939176
	1.17738	1.06138	0.686862	1.04393
	1.14826	0.858187	0.799583	1.031
	1.2073	1.11804	0.815107	0.9158
	1.02657	0.940615	0.799379	1.12055
	1.0481	0.827589	0.790294	1.10959
	0.725845	0.990408	0.810733	1.02732
	0.82544	1.10792	0.804045	1.09866
	0.725861	0.912455	0.81343	1.07564
	1.07384	1.02221	0.800802	0.97478
	1.44011	1.07555	0.804131	0.996686
	1.26291	1.02225	0.827777	1.06467
	1.12594	0.974577	0.774385	1.18172
	0.981438	0.872387	0.80568	0.920727
	0.934918	0.896525	0.804015	1.11513
	0.835815	1.02046	0.816423	1.06803
	1.02487	1.04679	0.844722	1.19619
	1.10257	1.06296	0.797001	0.932803
	1.11795	0.991872	0.826156	1.03091
	0.885139	0.900296	0.79839	0.973273
	1.35806	0.867441	0.805987	1.04998
	1.0015	0.943178	0.820928	1.12331
	1.15481	0.883221	0.799507	1.16391
	1.0776	0.918592	0.799926	0.936394
	0.739286	1.07449	0.831091	1.04635
	1.04594	0.929319	0.784306	1.01912
	1.13929	0.890751	0.821296	1.16318
	1.44551	0.926709	0.808455	0.97086
	1.18036	0.955145	0.817954	0.967834
	1.00077	0.936647	0.790853	1.01594
	1.04621	0.942734	0.799921	1.06138
	1.001	0.944577	0.796236	1.02059
	1.07181	1.08318	0.820003	1.04569
	1.0942	0.978334	0.800463	1.02911
	1.10261	0.907245	0.809572	0.904982
	1.16884	1.0296	0.799502	1.09969
	0.981262	0.956317	0.91504	1.16129
	1.14546	1.09301	0.821801	1.20361
	1.06826	1.03321	0.820283	1.05066
	1.12454	0.994644	0.814796	0.974957
	0.956288	0.895819	0.823593	0.999718
	1.02796	0.926209	0.829919	1.06251
	0.943599	1.00982	0.842855	1.10328
	1.16392	0.954858	0.800519	1.0405
	0.705443	1.21008	0.803234	0.949034
	0.960928	1.06805	0.853076	1.14798
	0.963792	1.00713	0.815995	1.12395
	1.30818	0.896018	0.816701	0.915265
	0.925109	0.891422	0.834025	1.0165
	0.671132	0.905333	0.806655	1.08484
	0.830185	1.03711	0.696547	1.16623
	1.20017	1.02261	0.782891	1.32128
	1.18418	0.700388	0.853424	1.07071
	1.15077	1.00793	0.80578	1.02518
	1.28532	0.743161	0.810429	1.13319
	0.818249	1.00537	0.806023	1.02881
	0.89187	0.968859	0.859437	1.0838
	1.24285	0.997805	0.801758	0.924827
	0.897757	0.950759	0.832897	0.915368
	1.1408	0.828696	0.823359	1.21937
	1.46558	1.00947	0.820103	1.01527
	1.02459	0.903113	0.809415	0.920108
	1.0711	0.983215	0.796016	1.0357
	0.931567	0.955372	0.813934	0.952501
	0.972392	1.06321	0.799106	1.00579
	1.04984	0.815775	0.799218	1.05548
	0.726384	1.00926	0.797752	0.928831
	1.05113	0.999624	0.804615	0.873551
	1.02236	0.965232	0.831223	0.943077
	1.44459	0.918693	0.832081	1.10553
	0.71084	0.778157	0.81139	1.06035
	1.45812	1.08822	0.901102	1.10958
	0.931623	1.05456	0.781583	1.0608
	0.674397	0.995444	0.815945	1.22354
	0.95603	0.945175	0.823081	0.994476
	0.913231	0.718846	0.80467	1.12692
	0.872421	1.07312	0.829315	0.976754
	1.15173	0.937522	0.813255	1.07882
	1.03253	0.958204	0.809291	1.01161
	0.632376	1.07775	0.799015	1.07236
	1.29895	1.0862	0.819307	0.891537
	1.28052	0.911564	0.813548	0.936721
	0.990572	0.900421	0.811936	1.12347
	1.0154	0.995716	0.807032	1.18887
	0.935807	0.997486	0.832046	0.890393
	0.9372	1.09493	0.808834	1.00645
	0.743624	0.760965	0.817988	1.0042
	0.999788	1.05702	0.79816	1.02069
	0.942361	0.867253	0.796557	0.957304
	1.12119	1.01268	0.792621	1.09801
	0.901448	0.761886	0.972193	1.12979
	1.10949	1.17762	1.00353	0.992358
	1.46748	1.10909	0.956325	1.05022
	0.997785	0.994334	0.935612	1.00312
	0.946095	1.14154	0.834221	1.09023
	1.36928	0.687347	0.920068	1.1749
	1.01469	0.759594	1.11278	0.95929
	0.903557	1.01815	0.965512	0.994704
	0.849503	0.776417	0.863493	1.06439
	0.818593	1.03499	0.909465	0.978525
	0.706236	1.25625	1.02138	1.05095
	1.07087	1.02183	1.04722	0.879298
	0.57587	0.746308	1.00848	0.988919
	0.822941	0.838008	1.02138	0.981851
	1.21396	1.23785	0.927163	1.09072
	1.02431	0.955543	0.870948	0.958648
	0.909786	1.17392	0.887004	1.07585
	0.891652	0.765252	0.913666	1.06486
	0.805223	1.04937	1.09774	1.09225
	1.11006	1.05772	0.853806	0.924322
	1.06979	1.23883	0.953595	1.1025
	1.30288	0.708873	0.902897	1.00432
	0.733686	0.925077	0.94272	0.975515
	1.14238	0.790103	0.936269	0.980094
	1.08827	0.994635	0.955794	1.09642
	0.843266	1.15675	1.07506	0.992102
	0.733018	1.03935	0.909503	1.10295
	0.982959	0.758488	0.96738	1.03168
	0.959693	0.671716	1.00615	1.05022
	1.24688	1.08964	1.03198	0.95681
	0.97691	1.08148	0.905564	1.03655
	1.25114	0.695996	0.978161	0.917132
	1.30298	1.40626	0.942766	1.05399
	1.13494	0.778821	1.03043	1.00837
	1.23673	0.88309	0.975121	0.973265
	0.940488	0.946878	1.24945	0.994389
	0.978541	1.16043	0.972385	1.00124
	0.966752	0.650556	0.709791	1.16944
	1.07699	1.09173	1.0347	0.972471
	1.08955	1.00307	0.823524	1.0658
	0.941052	0.735386	1.00903	1.08678
	0.997715	1.25808	0.904938	0.991352
	0.950096	1.04087	1.02727	0.960824
	1.10716	1.39596	0.802875	1.14171
	1.02207	0.673744	0.99734	1.03575
	0.919296	0.741143	0.945839	1.18635
	1.31266	1.13716	1.04489	1.06659
	1.01293	0.994328	1.01792	0.955087
	0.831065	0.667847	0.783105	0.973883
	0.731611	1.21588	1.04763	1.09922
	0.860374	0.766021	0.956449	1.00557
	1.02218	0.836765	0.891446	1.11417
	0.958153	0.743366	0.708452	1.11733
	1.04526	0.810579	1.10107	1.05154
	1.04224	1.01278	0.953666	1.09709
	1.06203	0.772826	0.963896	1.05049
	0.952273	0.797948	1.05078	1.16936
	0.928276	1.0016	0.988345	1.05844
	0.842919	0.956658	0.917051	1.06814
	0.905794	0.751583	1.0536	0.92035
	0.844809	0.721938	0.906981	0.982002
	1.03857	1.01158	0.969998	1.19145
	1.05346	1.05876	1.02427	0.970946
	1.12042	0.800292	0.905179	1.02979
	1.18758	0.803925	0.866052	1.14604
	0.900201	1.20694	0.966175	0.961789
	1.08441	0.745422	0.978491	1.06135
	1.07224	1.03187	0.976616	1.07426
	1.10646	0.747352	1.02209	1.13192
	1.52923	0.747349	0.934096	1.00667
	1.20111	0.757634	1.00943	1.05304
	0.876806	1.00479	1.00523	1.19252
	1.02549	0.976429	0.899714	0.972118
	1.10206	1.22297	0.69765	1.00343
	0.923316	0.732482	0.878198	1.14777
	0.990689	0.898788	0.894159	1.20983
	0.884385	1.21983	0.996542	0.9439
	1.04765	0.765776	1.00568	1.0694
	0.729764	0.883014	0.984216	1.13412
	0.987753	0.895912	0.912128	1.10549
	0.858048	0.862172	0.734381	1.14466
	0.926959	0.740247	0.724731	0.972973
	1.17782	0.773309	0.726647	1.05712
	0.924066	0.992671	0.94273	1.02715
	1.0304	1.03695	1.0009	1.09634
	1.09975	0.762131	0.981082	1.01771
	1.04109	0.756901	0.833169	0.965351
	0.938319	0.767053	0.998701	1.05496
	1.17837	0.814372	1.01779	1.18747
	1.08694	0.679793	0.913486	1.00604
	1.11828	1.11064	1.09234	1.06319
	1.08738	0.747429	0.979043	0.967499
	1.19836	0.786216	0.913098	1.02191
	0.580466	0.787878	0.913855	1.11617
	0.913035	1.15131	1.04133	1.043
	1.1634	0.794413	0.924852	0.902886
	0.943185	0.765695	0.966942	1.03999
	1.11796	1.08756	1.03299	0.923464
	1.08726	0.766281	1.0163	1.06111
	0.885766	1.52103	0.894633	1.01537
	0.930218	0.789005	1.2346	1.06433
	0.926824	0.653845	0.860934	0.988607
	1.12109	1.18294	0.871338	1.05362
	1.03	0.760981	0.953462	0.973518
	1.16597	0.746358	0.938196	1.05018
	1.27428	0.776204	0.970973	1.10286
	1.20582	0.797685	0.904712	1.07944
	1.12063	1.02129	0.936179	1.10836
	0.975052	1.21246	1.19217	0.994935
	0.975532	1.06476	1.05091	0.965424
	1.12879	0.813154	0.987504	0.986368
	0.994183	0.756288	0.975035	0.889977
	1.10763	0.764049	1.03605	1.09198
	1.035	0.728266	0.933239	1.01522
	1.0731	0.779509	0.968879	0.934613
	1.15549	0.812557	0.823426	0.987578
	1.05068	1.13625	0.892542	1.04577
	1.02216	0.76044	0.942667	0.97761
	0.938138	0.964114	0.896284	0.923988
	1.02119	0.74281	0.897699	1.0213
	1.14671	0.747236	0.948114	1.1604
	0.859235	0.764762	0.899544	0.905519
	0.915512	1.05529	0.940576	1.01139
	1.00224	0.776793	0.962768	1.14865
	1.21679	0.784338	0.956342	1.04141
	1.08315	1.14165	1.18298	1.12488
	0.919339	0.757959	1.02758	1.06281
	1.16269	0.775667	0.995494	1.01218
	0.821787	0.78811	0.948905	1.15812
	1.4024	1.13504	0.89195	1.05798
	0.877143	0.751309	0.97851	0.960632
	1.06298	1.12409	1.00083	0.940059
	1.46197	0.779394	0.930971	1.00799
	1.06656	0.750175	0.926682	0.97297
	0.874993	0.747704	1.17017	1.16178
	1.26477	0.716786	1.02928	1.05882
	0.905208	0.765485	1.17818	1.03739
	0.892272	0.770007	0.937347	1.03588
	1.10171	0.723211	0.927503	1.11765
	0.953811	1.19848	1.10062	1.0506
	1.2538	0.765121	0.960297	0.983935
	1.38154	0.669109	0.995862	1.06573
	0.971353	1.11206	1.04151	1.01931
	0.667845	0.789505	0.904671	1.12764
	0.934443	0.725543	1.0608	1.15579
	1.23959	0.730616	0.941561	1.04978
	1.18959	0.755071	0.981854	0.928766
	1.05132	1.17492	0.809138	0.916514
	1.10197	1.34507	1.01895	1.05928
	1.17047	0.769592	0.978098	1.12241
	1.16317	1.212	0.842357	1.06664
	0.976683	0.798894	0.953123	0.90327
	0.882852	1.02292	0.836456	1.14278
	0.734401	0.771961	1.07826	1.11398
	1.16047	1.10467	0.929039	1.14426
	1.07157	0.813781	0.953386	1.01375
	0.896546	0.982171	0.935498	1.24192
	1.0936	1.12138	0.978204	0.852505
	1.11148	1.17668	1.09228	1.20477
	1.2978	1.01335	1.00837	0.986707
	0.969063	0.823141	1.48982	0.988218
	0.869089	0.865657	0.957599	0.968991
	0.961001	0.810324	0.89512	1.09173
	0.727515	0.819893	1.15471	1.04302
	1.04701	0.720493	0.924358	0.998384
	0.899851	0.751736	1.01452	0.911119
	0.939363	0.750118	1.06542	1.09275
	0.945406	0.661029	0.954489	1.01526
	0.855782	1.24249	1.04194	1.1462
	1.28066	0.778245	1.02954	1.08467
	1.1043	0.774948	0.856469	0.897352
	0.928339	0.732067	0.928078	1.06127
	1.0668	1.15761	1.12755	0.996844
	0.983911	0.760324	1.03229	0.864982
	1.02604	0.753018	0.79979	1.01796
	1.14152	0.722999	0.886633	0.908456
	1.17157	0.799752	0.971057	1.09595
	1.01006	0.789173	1.1209	1.1077
	1.09668	1.05727	1.03786	1.09196
	1.11098	0.730909	0.923076	1.12016
	0.881658	0.633277	1.23887	1.13176
	1.13332	0.67202	0.948219	1.14623
	1.02789	0.77719	0.996498	0.979738
	1.18748	0.827405	1.02726	1.0465
	1.07423	0.790672	0.850138	1.0017
	0.89393	0.956899	0.978892	1.03685
	0.913116	0.82303	0.995328	0.984722
	0.883245	0.797951	1.04903	1.15094
	1.04696	0.768452	1.2165	1.11479
	1.13241	0.778367	0.910673	1.13482
	1.08035	0.786312	0.921085	1.13228
	0.940242	0.814771	0.987996	0.919758
	0.919964	0.980608	0.709125	0.927598
	1.06674	0.819865	0.95492	1.07756
	0.893487	0.947838	1.06548	0.893594
	0.968284	0.761908	1.03683	1.12358
	0.930375	0.81868	1.01035	1.05606
	1.09459	0.964514	1.01067	0.910382
	0.933068	0.937042	0.934866	1.01484
	0.992255	0.792031	1.00905	1.12384
	0.857089	0.711302	1.01429	1.05221
	1.12916	0.774961	1.25096	0.967283
	0.815832	0.974124	1.04649	1.05894
	0.85444	0.788514	0.968346	0.92194
	0.901724	1.14086	0.869114	0.917173
	1.13946	0.744864	1.13076	1.00658
	1.04857	0.822786	1.0955	1.07871
	0.931238	0.775296	1.03679	0.922513
	0.991654	0.723291	1.07044	1.0314
	1.1592	1.17296	1.01365	1.10839
	1.12531	0.918457	0.917617	0.981468
	0.933321	1.16391	1.04792	1.17816
	1.05711	1.0168	1.11027	1.24287
	0.865132	0.782101	0.932776	1.1087
	0.967549	0.981632	0.873029	1.10673
	0.983942	0.692581	0.948976	1.04787
	0.996632	0.829677	1.02581	0.958379
	0.888263	1.08657	0.954283	1.08434
	1.06548	1.04286	0.932383	1.18545
	0.935247	0.815882	0.926581	1.08114
	1.17631	0.899548	0.841508	1.16553
	1.26894	0.839121	1.03521	0.948374
	0.965996	0.743665	0.769183	0.945651
	1.11943	0.922421	0.982189	0.92775
	0.887248	0.8433	0.949123	1.02444
	1.30288	0.796151	1.03888	1.12075
	1.15636	0.807321	0.77643	0.920103
	1.10268	0.828142	0.911507	1.08702
	1.00761	0.823306	0.95763	1.14786
	1.02919	1.0958	1.04853	1.08259
	1.13566	0.853124	0.785546	0.930422
	1.09262	0.763428	0.997482	0.895943
	0.870238	0.842853	0.981263	1.12823
	1.15921	0.841023	1.03635	0.912975
	1.36849	0.767625	0.964674	1.00877
	0.986348	0.752544	0.984244	1.09714
	0.648319	0.804753	0.974247	1.20753
	0.927672	0.929853	0.94979	1.02851
	1.10945	0.998507	0.864457	1.20257
	0.686181	0.89488	1.10798	1.07641
	0.838962	0.847626	0.979751	1.13894
	1.06762	0.779698	0.991924	1.06853
	1.19043	0.893591	0.865247	1.18927
	1.01678	0.762458	0.839648	1.0175
	0.908046	0.860186	0.809878	1.22281
	1.07024	0.936825	1.02773	1.29613
	1.03235	0.853148	0.883225	1.0424
	1.27663	0.954469	1.08769	1.03737
	0.937872	0.84845	0.959839	1.0511
	1.08347	0.923809	0.862859	1.08925
	1.03306	1.08182	1.01201	1.08819
	1.06051	0.903025	0.88543	1.02515
	0.974256	0.835005	1.02071	1.00667
	1.15904	1.03867	0.917618	1.0885
	0.937089	0.814979	0.887521	1.08183
	0.916222	0.846811	0.749245	1.14085
	1.38271	0.921405	1.08357	1.12002
	0.995914	1.02049	0.897844	1.08175
	1.04137	0.975455	1.17813	1.11508
	1.05548	0.968517	1.08382	1.10968
	1.39424	0.898274	1.0945	1.12066
	0.984901	1.07851	0.887865	0.940803
	0.969988	0.921899	0.891834	0.93498
	1.10781	1.0235	0.9205	0.935116
	1.16356	0.96467	1.02193	0.905951
	0.992078	0.986685	0.899888	1.13457
	1.17606	1.06053	0.863778	1.04754
	0.997889	1.02892	0.937924	1.19144
	1.01452	0.957207	0.952299	1.1025
	0.98998	1.08918	0.920488	0.993384
	1.18724	0.964709	0.84085	1.19813
	1.19096	0.981204	1.02526	0.93477
	0.835601	1.57455	0.943339	1.02279
	1.21494	0.932968	0.943048	0.992769
	1.11171	1.04875	0.949193	1.05339
	0.93917	1.0017	0.884282	0.92815
	1.14484	1.05617	0.892919	0.970251
	1.25292	1.00105	0.589394	1.00023
	0.924194	0.978428	0.73296	0.981476
	0.89032	1.09698	0.937071	0.994473
	1.06658	1.15392	1.01716	1.16569
	0.991658	0.730349	1.11451	0.983183
	0.99474	0.912589	1.05638	0.953776
	1.05572	0.647509	1.22783	1.1356
	0.968272	1.04634	0.96032	1.07558
	1.04604	1.05051	0.912917	1.11479
	1.10155	1.09912	0.960369	1.05835
	1.09255	1.1469	0.946064	1.10989
	1.17379	1.00224	0.949766	1.14062
	1.16047	0.712336	0.868991	0.983659
	0.908059	1.17714	0.953255	0.933082
	0.914028	1.22953	0.853327	1.08097
	1.01047	1.1358	0.841688	1.1346
	1.18926	1.0742	0.879453	1.04779
	1.27259	1.19275	1.11812	1.14661
	0.737794	1.12825	0.877393	1.16321
	0.840534	0.936412	1.12792	0.934335
	1.01873	1.16806	0.921401	1.14948
	0.921536	1.07615	1.02672	1.033
	1.14552	1.13002	0.88726	0.929597
	1.03876	1.18155	0.954561	1.06045
	1.12464	1.1776	0.889257	1.17728
	1.08646	1.1536	0.960193	0.963146
	1.07203	1.07512	0.933229	0.846475
	0.954138	1.15541	0.952132	0.948275
	1.34743	0.980444	0.959072	0.930426
	1.245	1.02794	0.961575	0.983334
	1.08407	1.03334	0.976487	1.12663
	0.971797	1.08281	0.988088	1.0939
	1.06753	0.922013	1.01746	1.04387
	0.866685	0.933058	1.06248	1.11686
	1.08992	1.06062	1.02959	1.10532
	1.14849	0.903973	0.875122	1.07626
	1.10593	1.05446	1.0494	1.14541
	1.05432	1.03321	1.24169	1.02568
	0.94191	1.05754	0.878889	0.901017
	1.03748	0.725067	0.996346	1.10084
	1.57582	1.08765	0.819241	0.94353
	1.13584	1.07308	0.811231	0.97561
	0.852954	1.15574	1.02003	0.998053
	1.24073	1.1998	0.875443	1.07145
	0.906907	1.08787	0.87322	1.08143
	1.0251	1.09812	0.862764	1.04498
	0.941115	1.02361	1.26373	0.8573
	0.94693	1.06987	0.873875	0.943824
	1.03234	1.03222	0.845182	0.991975
	0.868282	1.06084	1.142	1.10676
	0.872805	1.13937	1.01849	0.93384
	1.24237	1.09519	0.998686	1.12486
	0.768494	1.10583	0.997792	1.09278
	1.01117	0.984276	0.882996	1.23284
	1.07543	1.12698	0.796037	1.00226
	1.03012	1.01425	0.92642	1.03244
	1.03966	1.20921	0.904847	1.09674
	0.983552	1.10442	0.771557	0.936886
	1.10562	1.02978	0.873993	1.09218
	0.947072	1.19479	1.06166	1.10939
	1.36059	1.11798	0.682328	1.16852
	0.997743	1.06927	0.970628	0.929326
	0.846165	0.928833	0.995457	1.1256
	0.740075	1.1056	0.926072	1.07293
	0.97195	1.01582	0.85187	1.10655
	0.903879	1.05656	0.815154	0.924347
	1.00943	1.1347	1.01686	0.919248
	1.07651	1.20939	0.887967	0.948302
	1.16227	1.06195	0.738592	0.971077
	1.09817	0.98991	0.911776	1.03954
	0.975071	1.04956	1.07042	1.03133
	0.734173	1.32731	0.957875	0.933053
	1.0468	0.68268	0.971013	1.02951
	1.03964	0.974337	0.924052	1.08339
	0.976634	1.07079	0.748771	1.1135
	1.0652	0.968308	0.945397	0.9332
	0.711616	1.13935	0.880849	0.891921
	0.909545	1.16476	0.961349	1.07304
	1.0806	1.1215	0.849434	1.10143
	0.933085	0.981452	0.769568	1.00419
	1.0497	1.26218	0.982761	1.06056
	1.03396	1.12636	0.879162	0.915405
	1.1796	0.997482	0.868645	1.12042
	1.07341	1.19535	0.913964	1.06798
	1.08184	1.02773	0.868352	1.01154
	1.06708	1.00963	0.922956	1.00624
	0.951442	1.1343	0.961411	1.11701
	1.13596	1.06733	0.95189	1.08757
	1.06948	1.17149	0.952913	0.952508
	1.04571	1.16907	0.896734	1.00095
	1.10994	0.81581	0.865034	1.04388
	1.1293	1.23535	0.869072	0.977472
	0.964338	1.07018	0.90059	1.0346
	0.897917	1.15543	1.06832	1.09779
	1.19839	0.975999	1.09267	1.1428
	1.1704	1.06706	0.922797	1.08033
	1.11614	1.07788	0.950343	1.04446
	1.23672	0.741907	0.833743	0.998507
	0.955517	1.09553	0.851326	1.06012
	1.13748	0.834652	0.824924	0.951474
	0.979776	1.13198	0.882451	0.996527
	0.943311	0.709948	0.568288	1.15504
	0.868954	1.26951	0.864445	0.989217
	0.763727	1.01618	0.897126	1.11055
	1.00962	1.08789	1.02139	1.08201
	0.995909	1.04142	1.01417	1.19613
	1.05573	1.05892	0.970791	1.03015
	1.13034	1.07147	0.947383	0.938058
	0.930156	1.1396	0.867216	1.05778
	1.00652	0.724166	0.703806	1.01531
	0.964072	1.11262	1.00376	1.07173
	1.08756	1.11272	1.01032	0.93198
	1.11696	1.09229	0.88956	1.03731
	1.2284	0.717327	1.07439	1.06808
	1.08578	1.08444	0.845971	1.03212
	1.09644	1.30753	0.828272	0.984112
	0.983742	0.637887	0.974764	1.03456
	1.12563	1.09922	1.00483	1.07764
	0.938193	1.14669	0.83128	1.09359
	0.989771	1.19494	1.03366	1.13481
	1.07198	1.04038	0.79689	1.04358
	0.954934	1.20728	0.981449	1.13515
	0.964199	1.05219	0.970682	0.983268
	1.09505	0.753009	0.973387	0.995071
	1.12864	1.09787	0.991029	0.889229
	1.06322	1.1385	1.01747	1.13805
	1.09897	1.0347	0.9318	1.10276
	0.98401	1.1338	0.985836	1.08036
	0.970419	1.16827	0.886316	0.909987
	1.02128	1.01549	0.947993	1.03278
	0.838317	0.711309	0.989887	0.966559
	0.91703	1.03666	1.05472	1.17265
	0.964624	1.43104	0.929973	1.04132
	1.25571	1.18458	0.97811	1.01667
	1.02002	1.26238	0.868457	0.995532
	1.17676	1.122	0.703249	1.01234
	1.27409	1.11456	1.05001	1.08203
	1.14759	0.888237	0.808744	1.06904
	1.03583	0.630594	1.00738	1.14364
	0.970625	0.669225	0.899027	1.02367
	1.10369	1.05113	0.938294	1.07845
	1.0048	1.183	1.00355	0.948748
	0.986735	1.12886	1.07993	1.07951
	1.04884	1.10797	1.00493	0.956085
	0.9417	1.0303	0.989296	1.08607
	0.946244	0.635947	0.837974	0.980143
	0.904654	0.992427	0.653203	1.04744
	1.11716	1.11429	1.01109	1.03183
	1.10569	1.40933	1.08913	1.08853
	0.892811	0.96659	0.843593	0.94557
	0.51666	1.06046	0.91924	1.08151
	1.20533	1.16808	0.716259	1.0233
	1.20046	0.731216	0.965409	1.16704
	1.19485	1.01718	0.849364	0.933464
	1.02162	1.09903	0.856695	1.10951
	1.03653	1.05083	0.963443	0.912026
	1.05147	0.812869	0.703305	1.02648
	1.09403	0.662988	0.836367	1.11888
	0.668405	0.84027	1.05944	1.17294
	1.20654	1.02415	0.717171	1.05963
	1.16283	1.1682	1.02358	0.870686
	1.1499	0.689632	0.972375	1.08114
	1.09995	1.00908	0.673428	0.910779
	0.88507	0.721409	0.916436	0.982763
	1.27912	0.699892	0.855971	1.00904
	1.1416	0.95925	1.03926	1.00417
	1.01055	0.953598	1.22221	1.15375
	1.12586	0.624748	1.03315	1.08992
	1.16744	0.83927	0.967187	1.02164
	1.02223	1.05764	1.05814	1.23508
	1.02065	0.696553	0.842968	1.03391
	0.928313	1.03018	1.09025	1.25995
	1.1643	0.749101	0.906166	1.00641
	0.719306	0.946148	0.982265	1.15676
	0.912457	0.681563	1.08468	0.941435
	0.965135	1.06952	0.938285	1.13657
	1.03385	0.878431	0.811932	1.1017
	0.942186	1.09604	0.858397	1.09773
	1.11965	0.957176	0.98058	0.93721
	0.965636	0.915329	0.716057	1.05796
	1.25316	0.674495	1.01185	1.22825
	1.20508	0.914919	0.8345	1.15334
	1.08585	1.02504	1.06941	0.985371
	0.968413	0.818899	0.870292	1.18793
	0.712256	0.829173	1.10935	1.07824
	1.13951	0.97745	0.880107	1.10326
	0.728837	0.971122	0.940255	0.985597
	0.956953	0.890911	0.90494	0.956319
	1.11267	1.12978	1.00988	1.05192
	1.07198	0.751097	0.889657	0.895295
	1.13089	0.73227	1.03703	1.04097
	0.929051	0.701948	1.03564	0.944418
	0.999178	1.13914	1.06036	1.07912
	1.17229	0.703529	0.910178	1.10547
	0.879789	1.06275	0.982237	0.990548
	1.01039	0.969611	0.994251	1.01554
	1.04866	0.922172	0.885804	1.04729
	0.97181	1.08971	0.714055	1.13273
	1.06128	0.596858	0.977115	1.07538
	1.18106	0.899047	1.06397	1.04125
	0.655052	0.754712	0.685986	1.03287
	1.02296	0.591516	0.903001	0.917273
	1.2472	1.00684	0.921765	1.16167
	1.05277	0.896138	0.972378	1.12224
	0.9642	0.991753	0.804783	1.19687
	1.04404	0.907598	1.12628	0.937508
	1.11549	0.854152	0.858199	0.991672
	1.08596	0.772868	0.811159	1.10841
	0.930539	0.680769	0.997114	1.03938
	1.12106	0.747488	0.964886	0.945523
	0.895533	1.10119	0.861973	1.10966
	0.877482	1.08697	0.90931	1.06702
	1.01815	0.98636	1.01188	0.979317
	1.05581	1.01342	0.855142	1.13525
	0.900326	1.04754	0.980166	0.990272
	1.15959	0.980809	1.10892	1.10338
	1.07577	0.966995	0.907147	1.15582
	1.05457	0.931974	1.00558	1.08368
	0.950931	0.526203	0.945163	1.11826
	1.05876	1.09231	0.689175	1.004
	0.859309	0.982631	0.926424	0.942251
	0.996334	0.754198	1.07852	1.18131
	1.03105	0.716246	1.02085	1.06181
	0.894606	0.937926	0.995859	1.14817
	1.33909	0.853799	0.818509	1.12131
	1.22653	1.01076	0.883567	1.07496
	1.05534	0.983409	0.868976	1.0148
	1.05067	0.857946	1.02575	0.947871
	1.05192	1.02241	1.00203	1.00835
	1.07091	0.989696	0.967752	1.03735
	0.93161	0.71744	0.886034	1.10645
	1.09532	0.997995	0.912083	1.0353
	0.664156	0.984148	0.957213	0.93402
	0.972981	0.908915	1.09412	0.96256
	1.09838	0.947403	1.01364	0.965774
	1.10268	1.02119	0.818007	1.09421
	0.437253	1.18059	0.834104	0.912293
	0.881722	0.954828	0.935795	1.04669
	0.946984	0.773494	0.948973	0.980547
	1.06935	0.852124	0.927405	1.00989
	1.08386	0.946866	1.0186	0.992732
	0.852099	0.967475	1.00111	1.01275
	0.997884	0.90677	0.941628	1.05708
	1.13008	0.682121	0.721017	1.01754
	1.12691	0.966034	0.92781	0.952331
	0.980239	0.661589	1.11111	1.00277
	0.921979	0.723708	1.02698	0.884311
	1.12669	0.984652	0.818231	1.07736
	1.12706	0.896671	0.966178	1.12458
	1.10041	0.589494	0.921313	1.15481
	0.908318	0.993935	0.882615	1.11941
	0.957966	1.07181	1.09639	0.944301
	0.668306	1.17751	0.910879	1.05175
	1.29928	0.667487	1.01487	0.932196
	1.01815	0.766503	0.843628	1.063
	0.987745	0.714707	0.957512	1.04658
	1.15414	0.930718	0.897249	1.1447
	0.799528	0.734102	0.983171	1.07755
	1.09148	0.755617	0.881013	1.07675
	1.04988	0.783344	1.06069	0.925866
	1.08106	0.689611	0.96651	0.931981
	1.08523	0.913442	0.886615	1.07032
	1.07139	0.698273	0.866461	1.07429
	0.897659	0.85298	1.0017	1.01338
	1.08014	1.04285	0.990134	1.13312
	1.23925	0.760815	1.02131	0.927484
	1.11086	0.699354	0.706836	0.999536
	1.07113	0.781605	0.843147	1.04507
	1.1086	0.76075	1.08366	1.04994
	0.909805	1.01617	0.91239	0.903676
	0.974823	0.769424	1.02227	1.21013
	1.07103	0.69591	0.959273	1.01359
	1.16324	1.05486	0.862229	0.991635
	1.02113	1.0786	1.15154	0.962089
	0.702603	0.901585	0.901604	1.13549
	0.957955	0.734021	0.987272	0.883541
	1.11542	0.848363	0.707444	1.15383
	1.07997	0.710793	1.03398	0.959981
	0.926763	0.712209	0.677021	1.07297
	0.944833	0.83515	0.992341	1.12305
	0.976829	0.857459	1.04536	1.04125
	0.981344	1.09913	0.865394	1.07431
	1.01345	0.683161	1.02932	1.06566
	1.02056	0.723161	1.05308	0.946761
	0.913108	1.0619	0.886097	1.05882
	1.0738	0.700288	0.810147	1.10248
	0.985981	0.812384	0.658204	0.889404
	0.875178	0.677507	0.84483	0.905329
	1.02069	0.708882	1.05407	0.980749
	1.16814	0.594567	0.81627	1.04153
	1.01728	0.958102	0.951812	1.14965
	1.14247	0.755166	0.92626	0.944354
	1.21465	0.646637	1.03029	1.05486
	0.974223	1.29444	0.852872	1.14544
	1.01592	0.714244	0.887257	0.998117
	1.0915	0.815417	1.00374	1.16352
	1.05948	0.841305	0.874421	0.893842
	0.585434	0.743825	1.11636	0.896671
	1.02649	1.03462	1.02765	1.03598
	1.35584	0.745514	1.01106	1.14364
	0.920373	0.795928	0.876772	1.09999
	1.08397	0.692888	0.904693	1.18014
	0.940487	0.890784	0.904912	1.00437
	0.994551	0.8962	0.676071	0.95962
	1.21635	0.939431	0.851987	1.1867
	0.994732	0.712995	0.915542	0.970121
	0.897168	0.780088	0.917079	1.11998
	0.994847	1.04134	0.873739	1.10287
	1.09909	0.76933	1.05162	0.992059
	0.898998	0.931524	0.917874	1.18049
	0.971777	0.749098	0.944056	0.994783
	0.915335	0.740011	1.02956	1.13054
	0.859361	0.786313	0.950136	0.992369
	1.10094	1.08141	0.912004	1.02801
	1.03779	1.18532	0.905862	1.12449
	0.942936	0.734833	1.04157	1.17397
	1.07365	0.746415	1.00874	1.10772
	1.18403	1.04166	0.987645	0.953114
	1.02785	0.722842	0.910541	1.06979
	1.00848	0.970672	0.906373	0.981095
	1.12157	0.640111	0.737845	0.931256
	1.09384	0.732414	0.937504	1.1667
	1.13683	0.966439	0.932487	1.14308
	0.894863	1.07124	0.916171	0.97741
	1.41181	1.10703	0.808815	1.10942
	1.15601	0.913255	0.950964	1.04767
	1.56099	0.932444	0.874716	1.24031
	1.12596	1.05662	0.922713	0.972507
	1.07024	1.14698	0.927795	1.19098
	1.48185	0.959889	0.572048	1.01151
	1.10411	1.03939	1.07024	0.917723
	0.953914	0.953629	0.779904	1.12381
	1.0965	1.07663	1.03034	1.12653
	0.905099	0.658988	0.842833	0.953795
	1.51052	0.790074	0.914235	1.00524
	1.11803	1.00665	0.980394	1.1383
	1.1215	1.01783	0.778346	0.982894
	1.0983	1.00639	0.904357	1.02003
	1.38962	1.10894	1.01662	1.02178
	1.4366	0.738094	0.770859	0.894112
	0.984308	0.750959	0.753036	0.91159
	1.1803	1.16845	1.10696	1.08237
	1.14568	0.929346	1.07399	1.20377
	1.44954	0.753385	1.01869	1.06523
	1.0921	1.09287	0.991301	1.01415
	0.943582	1.04976	1.09625	0.970976
	1.41701	0.900309	0.713952	0.980961
	1.0189	0.718907	1.06787	1.07853
	1.0665	0.835657	1.04533	1.12325
	1.30423	0.772211	0.825997	1.08784
	1.02653	0.954585	0.956379	1.0371
	1.45464	1.08783	0.929948	1.01603
	1.23854	0.795931	1.04053	1.0505
	1.33038	0.856291	1.01697	0.996681
	1.01653	0.79736	1.08874	0.895628
	1.4402	0.974434	0.656748	1.10435
	1.12436	0.944144	0.996878	1.05346
	0.888662	1.32965	0.647394	1.03725
	1.01338	0.717236	0.730134	1.04156
	1.2718	0.953247	1.11742	0.994599
	0.891836	0.82132	0.868636	0.968717
	0.936832	0.831311	0.97422	0.935277
	0.906522	0.828356	1.03486	0.920578
	0.982574	0.747124	0.896365	0.953428
	0.801459	1.15507	0.862229	1.11662
	1.01341	0.806237	1.02948	0.964508
	1.00862	0.952488	1.03962	1.23099
	1.36761	1.06568	1.02125	1.25062
	1.1957	1.04404	1.00358	0.933736
	1.48369	0.796569	1.0324	0.851166
	1.3444	0.817813	0.76389	1.08757
	0.899672	0.861471	0.879382	1.15132
	0.972658	0.78925	0.933523	1.11338
	1.38739	0.862834	1.16419	1.08881
	1.28157	0.867981	0.91611	1.074
	0.867732	0.906134	0.766912	0.938589
	1.07805	1.02899	1.02821	1.13441
	1.05204	0.881463	1.06727	1.00775
	1.18757	0.757771	0.897214	1.09728
	1.08777	1.03984	0.93004	1.0317
	1.09827	0.718032	0.842178	0.906764
	0.921426	0.928922	1.08243	1.10543
	1.07149	0.841571	1.04453	0.963993
	1.09305	0.896292	0.869256	1.05303
	1.26766	0.962954	1.13896	1.03264
	0.974585	0.683818	1.05151	1.07532
	1.43684	0.937692	0.977889	1.00291
	1.0033	0.677005	1.00259	1.13831
	1.45133	1.26456	0.987845	1.0072
	0.958312	0.749574	1.05584	1.10314
	1.11452	1.01979	0.977014	1.10436
	1.06634	0.944366	0.976425	1.08525
	0.88609	0.736002	1.02008	0.897446
	1.115	0.815313	1.063	0.978611
	1.14965	0.682768	1.05469	1.03368
	1.23453	1.02871	0.992002	1.18257
	1.3042	0.736151	0.981258	1.10553
	0.931347	1.0364	1.04089	1.04496
	0.928553	1.04533	0.878715	1.1584
	1.21881	1.05374	0.928093	1.00309
	1.0136	0.788076	1.01543	1.15575
	0.985349	0.72126	1.04215	1.08732
	0.886653	0.809867	0.748186	1.08478
	1.03252	0.813981	0.810702	0.95191
	1.07357	0.886086	0.914939	1.1461
	1.21796	0.730881	0.97121	1.00496
	1.05913	0.818673	1.00607	1.15755
	1.18066	0.747	0.934226	0.931206
	1.16248	0.795904	1.08109	1.07574
	1.05953	0.757828	0.89457	1.094
	1.14603	0.798577	1.00175	0.965717
	0.874287	0.747594	1.07142	1.02131
	1.0814	0.754213	0.992267	1.14577
	0.921216	0.745069	0.979999	1.1339
	0.921411	0.85544	0.986758	1.03151
	0.9425	0.757067	1.16657	0.946799
	1.04819	0.785503	1.14846	0.947796
	1.10139	0.732188	1.05122	0.985783
	1.13002	0.739882	1.04947	1.12387
	0.84616	0.905849	0.815668	1.14502
	1.05253	0.768042	1.0842	1.11207
	1.16511	0.760543	0.830977	0.912084
	0.980062	0.926202	0.853892	0.92899
	0.995106	0.743906	1.12937	0.922178
	1.11831	0.76234	0.969928	1.13649
	1.01076	0.720771	0.848854	0.887918
	1.22681	0.980485	0.969281	1.14497
	0.914653	0.793741	1.04482	0.900388
	1.12402	0.976727	1.0762	1.06242
	0.947697	1.08946	0.886188	0.960967
	1.02816	0.758143	0.879979	1.01612
	0.921508	0.684808	1.06583	1.04045
	0.974183	0.907236	1.00659	1.05001
	0.963631	0.767914	0.991333	0.8948
	0.979592	0.738685	0.6773	1.1209
	1.21582	0.755843	0.886286	0.965609
	0.880405	0.798492	0.826007	1.00476
	1.19765	0.910175	1.11279	0.900186
	1.06098	0.792088	0.937756	1.10379
	1.03413	0.775596	0.919622	1.07599
	1.37392	0.764369	0.792222	1.12455
	0.845117	0.870207	1.06355	1.0537
	0.909803	0.924853	0.994039	1.08305
	0.984425	1.00873	1.10165	1.14365
	1.0861	0.886407	0.891323	1.06484
	1.27342	0.779559	0.947302	1.03806
	0.955154	0.703227	0.885005	1.13816
	1.00449	0.746939	0.942784	0.862507
	1.07405	0.874904	1.01727	1.06647
	0.93193	0.858258	1.0191	1.01868
	0.88794	0.89142	0.968306	1.1067
	1.12979	0.82819	0.920969	1.04958
	1.24941	0.993405	1.20132	1.09009
	0.996084	0.815346	0.7828	1.01982
	1.0875	1.13177	0.879001	1.16012
	0.902147	0.932171	0.812102	0.953931
	1.45028	0.780207	0.92024	1.03151
	1.0274	0.967333	0.999629	0.961065
	0.831669	0.772004	1.05845	1.10302
	0.870739	0.850954	1.03128	0.948747
	0.965585	1.05654	0.999418	1.03841
	1.09334	1.01432	0.773498	1.03964
	0.869302	0.825164	0.853097	1.11387
	1.15166	0.85823	1.09608	0.990757
	1.03923	0.77214	0.810505	1.19905
	0.736005	0.885384	0.902169	0.955942
	1.34409	0.954064	0.925106	0.918012
	0.990441	0.825413	0.828924	1.03014
	1.41501	1.01016	1.03526	0.904316
	1.15165	0.943138	0.839909	1.00535
	1.00481	0.861623	0.914441	0.950052
	1.13215	0.75051	0.918805	1.16319
	1.56518	0.698478	0.999297	0.995708
	1.30401	1.00145	0.910552	1.01011
	0.820545	0.732653	0.900338	1.088
	0.829822	0.726852	0.902034	1.00308
	0.841323	0.801678	0.891583	0.867608
	0.923886	0.815656	0.895879	1.01201
	1.05689	1.3801	0.981147	0.973672
	1.52347	0.896446	1.00944	0.973733
	1.03088	0.716735	0.891687	1.13555
	1.0598	0.897746	1.01127	1.08659
	1.5687	1.04486	1.08919	0.971311
	1.20964	0.894245	0.959827	1.0696
	1.17681	0.979602	0.834855	0.961581
	1.33976	0.972908	0.701986	1.20878
	1.27012	0.934524	0.834146	1.00347
	1.09843	0.887544	0.917137	1.02944
	0.930655	1.06243	0.874079	1.19713
	0.990559	0.952478	0.846966	1.07389
	0.868484	1.03601	1.11097	1.08855
	1.21797	1.0833	0.936842	1.07607
	0.97584	0.958341	0.952141	0.913979
	1.39872	0.890357	0.848507	1.02872
	0.912769	0.922432	0.987567	1.00669
	1.00707	0.979393	0.982619	1.02627
	1.018	1.00914	1.03971	0.994488
	1.23962	0.879948	0.930437	0.938604
	0.821813	1.11101	0.962673	1.20402
	0.928435	0.993977	1.0354	0.93269
	0.612334	0.879007	0.941773	0.907159
	1.30463	1.05994	0.717714	0.999073
	0.939107	0.856833	0.918334	0.997692
	0.959552	1.01061	0.875671	1.01649
	1.37069	0.999882	0.896841	0.976954
	1.35572	0.972746	1.04159	1.06464
	0.86569	0.953052	0.855055	0.923705
	1.31235	1.0202	1.06827	1.06506
	1.20884	0.952522	0.99001	1.14816
	1.45884	1.07196	0.313305	0.989886
	0.874753	1.07836	0.689305	0.939339
	1.28398	1.1638	0.560948	1.15557
	0.816494	0.973464	1.01228	1.11881
	0.697465	0.940377	0.882077	1.18605
	1.05458	1.22482	1.00231	1.04317
	0.737322	0.682113	0.988141	1.16199
	0.863583	0.958642	1.0074	0.927186
	1.02016	1.02133	0.898956	1.02811
	1.05568	1.0593	0.871583	1.00612
	0.984254	0.910143	1.06552	1.12609
	1.04675	0.899893	0.674173	0.96751
	1.09457	0.909908	1.19376	1.07623
	1.20018	0.995387	1.04117	1.06068
	1.07623	0.917446	1.24915	1.01762
	0.979811	1.05219	0.846984	1.15542
	0.836865	0.902397	0.715093	1.14482
	1.1183	1.02317	0.873029	1.2056
	1.1257	0.908285	0.9172	1.17021
	1.23263	1.00858	0.887576	1.04453
	1.08059	1.04346	1.07696	1.03924
	0.961624	1.01846	1.03468	1.0561
	0.853662	0.934071	0.844989	1.08573
	1.07903	0.932184	0.905911	0.99897
	0.915686	0.967131	0.810114	0.900926
	1.03435	1.00314	0.832794	1.10278
	1.3058	0.984521	0.721247	1.20701
	1.28728	1.17651	0.903971	0.997058
	1.31707	0.945576	1.03512	1.0194
	1.03519	0.926026	0.956189	0.96446
	0.953372	1.04867	0.997401	1.05294
	1.0827	1.06833	0.924981	1.11713
	0.857063	1.54793	0.845334	1.2292
	0.973707	0.830966	1.02977	0.957099
	0.868732	1.00536	0.928326	1.02852
	0.998559	0.972224	0.870531	0.921542
	0.935873	1.07083	0.870378	1.13968
	0.914653	1.11008	0.875387	1.17809
	1.02529	0.997175	0.984034	1.08675
	1.00917	1.08791	1.00998	1.09933
	1.21922	1.22627	1.06042	1.0058
	0.872814	0.803921	1.09525	0.91352
	0.755472	1.17598	0.973131	1.06611
	0.877806	0.952877	0.936687	1.09777
	1.17873	0.930784	1.01243	1.0722
	1.12732	1.03141	1.0834	1.15226
	1.08712	0.732791	1.00346	0.993522
	1.14744	0.673435	0.99944	1.04671
	0.950992	0.710375	0.965724	1.02585
	0.984124	0.933854	0.981738	1.0304
	0.899498	1.09256	0.995716	1.15909
	1.08179	1.05221	0.955767	0.918719
	0.98296	0.711721	0.937143	1.07786
	1.28978	1.00764	1.0849	1.04436
	0.729727	0.936485	0.990916	0.853768
	0.909201	0.718328	0.990792	1.12803
	1.08389	1.11117	0.699571	0.91351
	1.08231	0.824283	1.04669	1.0434
	1.06469	1.0159	0.876989	1.01689
	1.08514	1.04524	1.07591	1.29218
	1.26046	0.961296	0.838506	0.887477
	1.35627	1.02393	1.04965	1.0091
	1.08466	1.35534	0.916878	1.16127
	0.961277	0.96694	0.971328	1.08789
	0.879537	1.07098	0.935933	1.01433
	1.0471	1.13245	0.921063	1.03691
	0.956928	0.735642	1.00403	1.09109
	1.04473	0.915534	0.718342	0.938871
	0.940826	0.998014	1.03002	1.04306
	1.03357	1.28454	0.9377	0.997756
	0.696654	0.806591	0.739339	1.08081
	0.879561	0.998598	0.953069	0.881618
	0.871081	1.01384	0.978512	1.15962
	1.43582	0.922106	0.817792	1.03384
	0.911319	1.08463	0.717101	1.11768
	0.94968	0.96943	0.975581	1.14829
	1.46088	1.01136	1.34568	0.938012
	0.997801	1.18266	1.11182	1.03539
	1.30266	0.972863	0.643666	1.07581
	0.857018	0.987451	0.814347	0.928546
	0.850745	1.09017	1.05498	1.10749
	0.973678	1.00354	0.910052	0.871263
	1.17489	0.956313	0.931259	1.20557
	0.908415	0.920127	1.03546	1.00236
	1.13288	0.751221	1.01923	1.10019
	1.11917	1.07443	1.16938	0.999114
	0.935526	1.05299	1.20967	1.09659
	1.2389	0.769094	1.09916	1.19796
	0.970218	1.03068	0.728005	0.898719
	1.10242	1.20691	1.05991	1.03826
	0.99691	1.13007	1.04131	0.931845
	1.02519	0.695681	0.889366	1.05994
	1.00263	0.992842	1.05416	0.985245
	0.977466	0.878485	0.992801	1.05683
	0.957448	1.1014	0.715214	1.0728
	0.881463	1.07576	0.642794	1.03479
	1.01946	0.811676	1.04675	1.00757
	1.00005	0.850366	0.83371	1.10715
	0.884905	0.994156	0.896581	1.05415
	1.21345	0.885943	0.988508	0.879837
	1.22671	0.999592	0.975668	1.13103
	0.857669	0.895284	1.06986	1.17847
	1.06996	0.913678	0.946745	1.17949
	1.03486	0.776206	1.08315	1.00456
	1.24062	0.98994	1.13031	0.926394
	1.11198	1.11446	1.11696	0.89582
	0.882657	1.0776	0.748174	0.979896
	0.959975	0.977221	0.895234	1.09572
	1.19283	0.931957	0.99638	1.0869
	0.862194	1.16067	1.00352	1.1837
	0.647893	0.770451	0.986294	1.08067
	0.824249	0.940215	1.05233	0.968859
	1.07998	0.771649	0.721054	1.07008
	1.39171	1.02577	0.721802	1.08339
	1.27174	1.09017	1.156	1.15196
	0.998749	1.07398	1.20321	1.07788
	1.05496	1.09039	1.02381	1.10911
	0.904816	0.952916	0.740573	1.11145
	1.01491	1.00361	0.987361	1.09882
	1.05755	0.941941	1.003	1.07219
	1.03688	0.796088	0.7079	0.996029
	1.18377	1.18018	1.00407	1.01553
	0.698525	1.08189	0.995874	1.12372
	1.22213	0.864156	1.0243	1.0271
	0.989067	1.02258	1.12894	0.969221
	1.17172	0.793841	1.17059	1.05424
	1.241	1.11764	1.02615	1.27152
	1.13213	0.744022	0.975183	1.01692
	1.08168	1.13469	0.872136	1.15321
	1.33886	0.945317	0.68271	0.99167
	1.18634	1.00757	0.947112	1.07904
	0.882249	0.8934	0.726038	1.16382
	1.03518	0.905933	0.975409	1.18788
	1.28078	0.949337	0.999949	1.00416
	1.19993	1.04501	0.919079	0.786377
	1.03436	1.01535	1.11078	0.932673
	1.06548	0.902535	0.707155	1.17949
	0.723435	0.937656	0.99405	1.07261
	0.670851	0.821434	0.702008	1.14574
	1.17453	0.93421	0.767738	1.13908
	1.30131	1.27548	0.940505	1.06936
	1.17047	1.02106	0.963727	1.05075
	1.35991	0.93271	1.02614	1.04208
	1.08626	0.722037	0.693216	0.972375
	1.072	1.04099	1.02439	1.00106
	1.16428	0.869069	0.99611	1.04202
	1.09475	0.996906	0.959378	0.99484
	1.06573	0.86858	0.672361	1.13136
	1.12377	1.00292	0.71464	1.16008
	1.18263	0.896551	0.916043	1.12211
	1.05904	1.00679	0.874886	0.919157
	1.12793	1.00483	0.911209	1.12919
	1.15022	1.1805	0.967385	1.08224
	0.882032	1.07221	0.88106	1.11194
	1.15893	0.978133	1.18607	1.17443
	0.830386	1.01255	0.857481	0.918409
	1.40711	0.998084	0.991865	1.05068
	0.86234	1.20271	0.956472	0.93067
	0.922868	1.11226	0.613858	1.1007
	0.70091	0.732114	0.990581	1.1005
	1.06173	0.915362	0.964923	0.85892
	0.86329	0.954638	0.83588	1.13691
	1.11154	0.964242	0.958206	0.907561
	1.17659	1.11852	0.913056	1.14787
	0.972266	1.01975	1.10597	0.904918
	0.934987	0.807411	1.02412	0.938578
	0.93037	1.17421	0.870685	0.902666
	1.09681	1.0831	1.05454	1.14609
	1.01709	0.951838	0.952577	0.973444
	0.722815	1.08708	1.25708	1.00206
	1.17096	1.00482	0.943814	0.880221
	1.01418	0.95127	1.04071	0.956402
	1.12069	1.05384	0.982755	1.09843
	0.923688	0.880402	0.910087	1.15405
	1.09783	0.9479	0.862894	0.89709
	0.885139	0.666548	0.999567	0.958177
	0.951354	0.990809	0.951388	0.892788
	0.899753	1.03563	1.04375	0.934196
	0.651864	1.21644	0.97697	0.913709
	1.19461	0.755832	0.90691	0.969605
	1.25689	0.974176	0.898984	1.18332
	0.95604	0.999515	1.00699	0.93495
	1.01611	1.0701	0.949866	1.04635
	1.04015	0.926313	0.946118	1.11782
	1.09061	0.917959	0.938037	0.843199
	1.05462	1.12208	1.10537	1.04427
	0.850713	0.917858	0.973124	1.10279
	1.00209	1.00054	0.980309	1.12998
	0.966915	0.898575	0.864903	0.996259
	0.968884	1.06476	1.07895	1.01772
	1.15205	1.07239	0.976803	1.01977
	0.924077	1.07442	0.976629	1.22513
	0.997485	0.497873	0.748435	0.943648
	1.29454	0.999852	0.87904	1.02976
	1.167	0.987036	0.934039	0.981297
	0.964587	0.762509	0.730745	0.926305
	1.24371	0.904428	0.91	1.09489
	1.39507	0.91301	1.05174	1.00906
	1.17989	0.997346	0.894573	0.902114
	0.934889	0.841153	0.861929	1.15856
	1.01844	0.939443	0.93466	1.08563
	1.13985	0.822294	0.958369	1.17334
	0.896759	0.897762	1.00173	0.987267
	1.19292	0.981194	0.6675	0.919699
	1.27069	0.943466	0.972162	1.01517
	1.10866	1.02164	0.889965	1.0797
	1.04115	0.886705	1.00485	0.949589
	1.02587	0.984628	0.852227	1.09674
	1.46256	0.671515	1.03711	0.909726
	1.0778	1.04365	0.918579	0.969283
	1.12946	0.994604	1.10246	1.02459
	0.996529	1.07785	0.903195	0.993629
	1.49234	1.22916	1.0616	1.126
	1.00176	1.05299	0.942281	1.19233
	1.10315	1.04147	1.01533	1.03854
	1.28796	0.810431	1.16403	1.02301
	0.934483	1.03457	0.922381	0.987399
	1.37114	1.25641	1.06786	0.911384
	0.938044	0.991454	0.934256	1.09228
	0.853129	1.04012	0.97328	1.11101
	1.11431	1.0282	0.999287	0.941024
	1.07289	1.06058	1.00387	1.0358
	1.14127	0.862006	0.917357	0.91831
	1.01382	1.12643	0.974594	1.04283
	1.05832	0.752894	0.974885	0.982568
	1.07073	0.969598	1.08175	0.962764
	0.9927	1.08197	0.969016	0.966897
	1.15929	1.04351	1.10403	0.9996
	1.11132	1.00643	0.728276	1.24644
	1.04812	0.899361	1.08656	0.951912
	0.700997	1.04634	0.946176	1.13834
	1.16212	1.02213	0.860431	0.935405
	0.698605	0.882378	1.07288	1.136
	1.18511	0.989907	0.904155	0.885566
	1.38439	0.875695	0.948535	1.02404
	1.16693	0.687812	0.97601	1.08533
	0.963811	1.09007	0.994112	1.0612
	0.987536	0.998973	0.708785	1.06622
	1.1081	0.956586	0.942217	1.0871
	1.04885	0.928512	0.998698	1.20406
	0.882445	1.19321	0.83609	0.999945
	1.37487	0.962737	0.90263	1.12277
	1.22724	1.07886	1.02703	1.04569
	1.15644	1.09816	1.1264	1.07826
	0.879939	0.903076	0.868527	0.910361
	1.08984	0.70687	0.946237	0.970074
	0.931888	1.23555	0.865611	0.996097
	0.874257	1.17933	0.897318	0.985539
	1.23334	1.10045	0.992679	1.08594
	0.919552	0.991828	0.882006	0.899941
	1.05525	1.06645	0.976182	1.15127
	0.99476	1.01008	1.12865	0.965695
	1.04141	1.03108	0.993148	0.987988
	1.40816	1.01656	1.0008	1.16933
	1.2957	1.09922	1.02261	0.937939
	0.941285	1.13136	0.876856	0.816599
	1.10505	1.25807	0.956409	1.04458
	0.996044	0.827122	0.961718	1.13693
	1.10947	1.0805	1.00031	1.08664
	0.973774	0.770588	1.06223	1.00052
	0.907629	1.18306	0.912145	1.09484
	0.902205	1.11589	0.989027	0.948703
	1.06562	1.25859	0.682152	1.00592
	1.12465	0.892135	1.03317	1.13213
	1.23901	0.694572	0.740332	1.01201
	0.905234	1.0502	0.693843	1.08824
	0.939291	0.776712	1.13975	1.09325
	0.4248	1.13205	0.725496	1.12617
	1.08849	1.07576	0.695957	1.05426
	1.13517	1.2301	0.952112	1.10582
	1.005	1.1369	1.09017	1.14575
	1.06204	1.18341	0.74522	1.00099
	0.998522	1.19613	0.939262	1.09517
	1.32048	0.826578	0.930709	1.07432
	1.24442	0.7171	0.931498	1.25028
	1.08687	1.06317	0.720709	0.884666
	1.14743	1.08696	1.07167	1.10785
	0.97594	1.05957	0.970111	0.949187
	1.35503	1.0616	0.720645	0.956588
	1.13559	1.25198	1.02058	0.895734
	1.02441	1.1078	1.05467	1.16597
	0.929537	1.02463	0.873054	0.972028
	0.91711	1.11469	1.00409	1.08346
	1.03699	1.06406	1.1122	1.10309
	1.12711	1.12725	1.24636	0.884811
	1.01037	1.01395	0.994655	0.978216
	0.727237	1.20604	1.0067	1.1384
	1.01334	1.16051	0.930465	1.09997
	1.08009	0.961828	0.944901	0.96567
	0.877596	0.817994	0.95161	1.14593
	0.750621	1.14827	0.678632	1.13386
	1.2713	0.925485	1.02822	1.08715
	1.52295	0.991248	1.16071	1.03522
	0.994008	1.02378	0.706218	0.950446
	1.21155	0.721865	1.35959	0.977433
	1.04557	0.994553	0.842096	1.12119
	1.13425	1.03767	1.08555	1.00817
	1.38823	1.14168	1.12529	0.935166
	1.06839	1.02216	1.09993	0.978864
	1.03526	1.00855	0.996215	0.99549
	1.00548	1.11182	0.92559	1.10544
	1.08386	0.989059	0.888546	1.08315
[truncated: 44,925 more rows]

## Sheet: Panel D
	Panel D: Example of the distribtion of relative pS270 signal in the stratum pyramidale of CA1
	Pooled Intensity values
	Ab7a	27G2
	0.536	0.551824
	0.782	0.607527
	0.138	0.942364
	0.033	0.846695
	0.035	0.86355
	0.108	0.967888
	0.091	0.942231
	0.046	0.855534
	0.156	0.951533
	0.115	0.90125
	0.073	0.826762
	0.046	1.02297
	0.076	1.05198
	0.217	0.956316
	0.121	0.864042
	0.365	1.2684
	0.093	0.925332
	0.068	0.794357
	0.129	0.939026
	0.025	0.857593
	0.067	0.932487
	0.226	0.959459
	0.025	0.843492
	0.088	1.01774
	0.043	0.897079
	0.063	0.843271
	0.132	0.978581
	0.177	0.957414
	0.066	0.826334
	0.025	0.953696
	0.041	0.847089
	0.112	0.902109
	0.086	0.987123
	0.039	0.970699
	0.11	0.923842
	0.248	1.14052
	0.079	0.818287
	0.097	0.873322
	0.021	0.779135
	0.023	0.809609
	0.423	0.970803
	0.033	0.839582
	0.043	0.784011
	0.055	0.818713
	0.114	1.00814
	0.131	0.771243
	0.149	0.883212
	0.048	0.909314
	0.053	0.776153
	0.025	0.843259
	0.025	1.05251
	0.311	0.612702
	0.059	0.807482
	0.085	0.984765
	0.114	0.969484
	0.231	0.802927
	0.045	0.871012
	0.129	0.843943
	0.053	0.794094
	0.138	0.860384
	0.031	0.840086
	0.176	0.909746
	0.183	0.832171
	0.027	0.854998
	0.058	0.892075
	0.144	0.947494
	0.159	0.831518
	0.037	0.83831
	0.085	0.819095
	0.042	0.957341
	0.142	0.952002
	0.026	0.818394
	0.073	1.04648
	0.026	0.776878
	0.02	0.85323
	0.109	1.00647
	0.025	0.900223
	0.1	1.02432
	0.062	0.813768
	0.032	0.83432
	0.047	0.811511
	0.078	0.852239
	0.106	0.94531
	0.178	0.994336
	0.284	1.11822
	0.022	0.826434
	0.216	0.880948
	0.095	0.837754
	0.175	1.00794
	0.192	1.06906
	0.054	0.887356
	0.093	0.939389
	0.022	0.821904
	0.087	0.879629
	0.169	0.777441
	0.042	0.87452
	0.034	0.89991
	0.027	0.828867
	0.029	0.822421
	0.024	0.847043
	0.444	0.801908
	0.028	0.76045
	0.029	0.802252
	0.066	0.819289
	0.063	0.965513
	0.147	0.930058
	0.021	0.81915
	0.038	0.890866
	0.114	0.899447
	0.025	0.81789
	0.055	0.800895
	0.032	0.838328
	0.144	0.999657
	0.149	1.11413
	0.169	0.765742
	0.255	1.31416
	0.14	0.769043
	0.05	0.716703
	0.117	1.02488
	0.036	0.865183
	0.398	1.16007
	0.14	1.03813
	0.051	0.773598
	0.033	0.829807
	0.036	0.845619
	0.115	0.980264
	0.066	0.831784
	0.129	0.910598
	0.036	0.791658
	0.031	0.811617
	0.12	0.890419
	0.286	0.708846
	0.038	0.875843
	0.095	0.896343
	0.086	0.775755
	0.088	0.933472
	0.079	0.89358
	0.114	0.79835
	0.346	0.553426
	0.146	0.960063
	0.097	0.934882
	0.047	0.895024
	0.788	0.492728
	0.028	0.822799
	0.156	0.988284
	0.023	0.7912
	0.103	0.941483
	0.162	0.775176
	0.02	0.781041
	0.244	0.690084
	0.023	0.832977
	0.174	0.752656
	0.05	0.825381
	0.043	0.833534
	0.062	0.820821
	0.101	1.02303
	0.031	0.789969
	0.042	0.825497
	0.095	0.914004
	0.102	0.873683
	0.069	0.882637
	0.153	0.889219
	0.07	0.778714
	0.05	0.850068
	0.053	0.809679
	0.07	0.822461
	0.021	0.868814
	0.087	0.831422
	0.146	0.792431
	0.022	0.859466
	0.077	0.941849
	0.268	0.715648
	0.082	0.860566
	0.021	0.833329
	0.049	0.957231
	0.04	0.897061
	0.047	0.820208
	0.049	0.851756
	0.054	0.927958
	0.021	0.825987
	0.162	0.99982
	0.132	1.17721
	0.077	0.826465
	0.057	0.891783
	0.035	0.94565
	0.08	0.745253
	0.125	0.917755
	0.058	0.964349
	0.02	0.871922
	0.085	0.807722
	0.079	0.928535
	0.05	0.792899
	0.613	0.479728
	0.097	0.978917
	0.048	0.812364
	0.033	0.872514
	0.032	0.814401
	0.075	1.01754
	0.169	0.877226
	0.067	0.788273
	0.278	0.494774
	0.245	0.809195
	0.028	0.835527
	0.021	0.842497
	0.035	0.887011
	0.054	0.820533
	0.081	0.772831
	0.114	0.91754
	0.089	0.891428
	0.062	0.854008
	0.077	0.696821
	0.071	0.814153
	0.325	0.576684
	0.046	0.997906
	0.03	0.811454
	0.112	0.904422
	0.024	0.834303
	0.038	0.813996
	0.021	0.931863
	0.062	0.88504
	0.186	0.823891
	0.12	0.822952
	0.066	0.803561
	0.129	0.968861
	0.052	0.907138
	0.033	0.808465
	0.377	0.722285
	0.076	0.923823
	0.047	0.863632
	0.068	0.792013
	0.072	0.815783
	0.258	0.739969
	0.109	0.841558
	0.034	0.839732
	0.109	0.831457
	0.041	0.830939
	0.04	0.800966
	0.025	0.847559
	0.124	0.806945
	0.027	1.03979
	0.115	0.950116
	0.025	0.799305
	0.076	0.821514
	0.087	0.699569
	0.424	1.21405
	0.103	0.682425
	0.125	0.804447
	0.772	0.450549
	0.097	0.958095
	0.031	0.903619
	0.197	1.00344
	0.186	0.822667
	0.024	0.825945
	0.048	0.958977
	0.025	0.794909
	0.068	0.926446
	0.27	0.827629
	0.102	0.920925
	0.023	0.906609
	0.115	0.69242
	0.09	0.659031
	0.069	0.957507
	0.177	0.764773
	0.034	0.823648
	0.021	0.807045
	0.143	1.0057
	0.077	1.10017
	0.628	0.607897
	0.504	0.633778
	0.021	0.768082
	0.108	0.78997
	0.047	0.832479
	0.113	0.750445
	0.092	0.869147
	0.124	0.989482
	0.437	0.73625
	0.107	0.771539
	0.071	0.820425
	0.062	0.831466
	0.026	0.839416
	0.021	0.774325
	0.072	0.838953
	0.147	0.943208
	0.072	0.871111
	0.443	0.464209
	0.13	0.99377
	0.051	0.913621
	0.172	0.870844
	0.088	0.919947
	0.056	0.839379
	0.029	0.853574
	0.543	0.415877
	0.042	0.714644
	0.193	1.07431
	0.117	0.760929
	0.121	0.977096
	0.091	0.899792
	0.079	0.892561
	0.282	0.694582
	0.139	0.901076
	0.098	0.621533
	0.099	0.914315
	0.026	0.711184
	0.086	1.03767
	0.091	0.899477
	0.043	0.808582
	0.027	0.797991
	0.13	0.832723
	0.155	0.971891
	0.129	0.767447
	0.122	0.907674
	0.052	0.844568
	0.028	0.780695
	0.108	0.708015
	0.055	0.894656
	0.028	0.839529
	0.07	0.623192
	0.024	0.90583
	0.046	1.02161
	0.063	1.01208
	0.216	0.988205
	0.588	0.546214
	0.116	1.01392
	0.03	1.06228
	0.083	0.792331
	0.06	0.823368
	0.083	0.850086
	0.324	0.657591
	0.205	0.980751
	0.046	0.845115
	0.091	0.904583
	0.037	0.83097
	0.087	0.801611
	0.108	0.704047
	0.163	1.01496
	0.081	1.00746
	0.114	1.08227
	0.049	0.788182
	0.454	0.505907
	0.025	0.83244
	0.085	0.815611
	0.047	0.803721
	0.075	0.943126
	0.199	0.759748
	0.035	0.905133
	0.022	0.817957
	0.072	0.914071
	0.027	0.791159
	0.112	0.755492
	0.028	0.849908
	0.041	0.868124
	0.056	0.814858
	0.061	0.76539
	0.162	0.873868
	0.275	0.609724
	0.12	0.708354
	0.025	0.86798
	0.147	0.773018
	0.176	0.982838
	0.021	0.849042
	0.118	0.899317
	0.291	0.755726
	0.153	0.88516
	0.141	0.898676
	0.024	0.915952
	0.12	0.770341
	0.054	0.809535
	0.022	0.88003
	0.166	0.952865
	0.02	0.973731
	0.033	0.836063
	0.041	0.846514
	0.733	0.519398
	0.029	0.788748
	0.19	0.89665
	0.033	0.837382
	0.065	0.969836
	0.05	0.743644
	0.038	0.805534
	0.02	0.768879
	0.026	1.00633
	0.116	0.995569
	0.021	1.05668
	0.11	0.883337
	0.034	0.86908
	0.052	0.891079
	0.039	0.874041
	0.165	0.743723
	0.107	1.07075
	0.056	0.808619
	0.025	0.971405
	0.023	0.969701
	0.057	1.05823
	0.035	0.81699
	0.054	0.947273
	0.26	0.748153
	0.097	0.973797
	0.129	0.973088
	0.233	0.770266
	0.091	0.918344
	0.154	0.9882
	0.038	0.851314
	0.234	0.656962
	0.148	0.744064
	0.03	0.828792
	0.022	0.830189
	0.062	0.915909
	0.06	0.89951
	0.037	0.85226
	0.453	0.76349
	0.203	0.698533
	0.049	0.784833
	0.059	0.860604
	0.106	0.932117
	0.038	0.790144
	0.073	0.875273
	0.179	0.812918
	0.044	0.793382
	0.15	0.976918
	0.109	0.841628
	0.077	0.829822
	0.033	0.847765
	0.068	0.918459
	0.045	0.865677
	0.087	0.942728
	0.024	0.902941
	0.034	0.824792
	0.025	0.789921
	0.025	0.831494
	0.08	0.961586
	0.17	0.98652
	0.078	0.881899
	0.148	0.896871
	0.128	0.745888
	0.06	0.936218
	0.297	0.634881
	0.024	0.802693
	0.13	0.885881
	0.121	0.955929
	0.08	0.860095
	0.083	0.876389
	0.087	0.91474
	0.032	0.851769
	0.113	0.778497
	0.074	0.785538
	0.024	0.828315
	0.037	0.808976
	0.022	0.796715
	0.179	0.950443
	0.309	0.780128
	0.158	0.985733
	0.041	1.00949
	0.105	0.843089
	0.241	0.701342
	0.033	0.805711
	0.045	0.830711
	0.027	0.814664
	0.066	0.838463
	0.038	0.927742
	0.047	0.822714
	0.05	0.97999
	0.158	0.96959
	0.031	0.816665
	0.058	0.772977
	0.068	0.838494
	0.037	0.880412
	0.021	0.780653
	0.254	0.943447
	0.103	0.796714
	0.062	0.861413
	0.093	0.96149
	0.237	0.637719
	0.044	0.916675
	0.084	0.939787
	0.076	0.826209
	0.155	0.956053
	0.049	0.936792
	0.033	0.906055
	0.044	0.815199
	0.136	0.926419
	0.047	0.813457
	0.037	0.763295
	0.029	0.810622
	0.068	0.809019
	0.118	0.703137
	0.073	1.08285
	0.154	0.818959
	0.031	0.940178
	0.081	1.06327
	0.095	0.806309
	0.038	0.729858
	0.07	0.817631
	0.066	0.836718
	0.093	0.840333
	0.023	0.828762
	0.079	0.884297
	0.059	0.833023
	0.199	0.866751
	0.105	1.02912
	0.131	0.922138
	0.37	0.558299
	0.052	0.877277
	0.036	1.03476
	0.138	0.802672
	0.109	0.941182
	0.452	0.618991
	0.022	0.874895
	0.034	0.865036
	0.02	0.903589
	0.059	0.737686
	0.297	0.713747
	0.03	0.813018
	0.034	0.881217
	0.108	0.836635
	0.145	1.13758
	0.269	0.715618
	0.041	0.818421
	0.051	0.836405
	0.03	0.874952
	0.16	0.892823
	0.063	0.702363
	0.15	1.03034
	0.096	0.736407
	0.073	0.978463
	0.055	0.67008
	0.067	0.826477
	0.041	0.884683
	0.041	0.852712
	0.061	0.816682
	0.188	1.20738
	0.04	0.968069
	0.347	0.623642
	0.05	0.91856
	0.034	0.813002
	0.059	0.899853
	0.051	0.949858
	0.383	0.756192
	0.028	1.03828
	0.102	0.791435
	0.024	0.883705
	0.284	0.532109
	0.116	0.94685
	0.027	0.850845
	0.182	1.21168
	0.109	0.876626
	0.211	1.08422
	0.096	0.868087
	0.221	1.10798
	0.048	0.952939
	0.051	0.843312
	0.208	0.915848
	0.142	0.861336
	0.083	0.923931
	0.02	0.869894
	0.067	1.02728
	0.034	1.07115
	0.069	0.842805
	0.142	1.00375
	0.252	0.734152
	0.064	0.904039
	0.05	0.795239
	0.054	0.922034
	0.076	1.31121
	0.05	0.807319
	0.03	0.832546
	0.283	0.712964
	0.09	0.990763
	0.067	0.770396
	0.049	0.803251
	0.028	0.849214
	0.12	1.01184
	0.208	0.641464
	0.041	0.853753
	0.02	0.815468
	0.461	0.55395
	0.191	0.821366
	0.085	0.822934
	0.09	0.88792
	0.081	0.909656
	0.078	0.847641
	0.149	0.97342
	0.05	0.843344
	0.039	0.810656
	0.082	1.01207
	0.149	0.850384
	0.268	0.871407
	0.105	0.894122
	0.071	1.08486
	0.375	0.714237
	0.108	0.972339
	0.144	0.905929
	0.236	0.708118
	0.317	0.872722
	0.043	0.893274
	0.087	0.994145
	0.458	0.677588
	0.088	0.939844
	0.062	0.791091
	0.087	0.874296
	0.043	0.928053
	0.067	0.984388
	0.107	0.875918
	0.166	0.685203
	0.046	0.785193
	0.025	0.855947
	0.208	0.706708
	0.195	0.915437
	0.124	1.04536
	0.267	0.700626
	0.311	0.735085
	0.061	0.949372
	0.029	0.845195
	0.062	0.953599
	0.07	1.00686
	0.033	0.818966
	0.033	0.964543
	0.151	0.926748
	0.049	0.801678
	0.28	0.773912
	0.062	0.787095
	0.091	0.754606
	0.198	0.760747
	0.026	0.810896
	0.129	0.975318
	0.061	0.776514
	0.079	0.907679
	0.039	0.814936
	0.205	0.722622
	0.108	0.981225
	0.268	0.648409
	0.459	0.612078
	0.036	0.832983
	0.073	0.950661
	0.57	0.573083
	0.136	0.81374
	0.029	0.847562
	0.362	0.976873
	0.038	0.885313
	0.035	0.935546
	0.396	0.717094
	0.047	0.912235
	0.057	0.875045
	0.028	0.914847
	0.08	0.929025
	0.057	0.949721
	0.101	0.773343
	0.054	0.776636
	0.078	0.996354
	0.2	0.694982
	0.275	0.739985
	0.033	0.777557
	0.133	0.75545
	0.026	0.756699
	0.099	0.995296
	0.135	0.719608
	0.03	0.821687
	0.178	0.648645
	0.118	0.96444
	0.112	0.895535
	0.051	0.833011
	0.041	0.8303
	0.165	0.722136
	0.043	0.821126
	0.318	0.718677
	0.523	0.544794
	0.132	0.84595
	0.028	0.881224
	0.082	0.796967
	0.046	0.907879
	0.07	0.929849
	0.337	1.09747
	0.05	0.898027
	0.261	0.688612
	0.068	0.800664
	0.034	0.836694
	0.107	0.91333
	0.023	0.80057
	0.091	1.01706
	0.111	0.795731
	0.213	1.0446
	0.08	0.725302
	0.126	0.937047
	0.157	0.909864
	1.033	0.520124
	0.148	0.741817
	0.04	0.787741
	0.061	0.852291
	0.112	0.768422
	0.057	0.790392
	0.047	0.871739
	0.057	0.805436
	0.048	0.854346
	0.067	0.892223
	0.08	0.878883
	0.223	0.622517
	0.063	0.967663
	0.353	0.560736
	0.047	0.827866
	0.044	0.898585
	0.057	0.777189
	0.043	0.839304
	0.931	0.493815
	0.352	0.595538
	0.079	0.949044
	0.068	1.00037
	0.422	0.709957
	0.129	1.19231
	0.295	0.632292
	0.031	0.867752
	0.116	0.981813
	0.098	0.908967
	0.022	1.00316
	0.035	0.954349
	0.068	0.730351
	0.059	0.969536
	0.053	1.02475
	0.044	1.11138
	0.036	0.812327
	0.165	0.998728
	0.259	0.684981
	0.021	0.768217
	0.082	1.06231
	0.136	0.733007
	0.051	0.862698
	0.132	0.975364
	0.114	0.782309
	0.125	1.01663
	0.067	1.01628
	0.027	0.826127
	0.047	0.845852
	0.124	1.06563
	0.135	0.920497
	0.104	0.723645
	0.086	0.879141
	0.096	1.02648
	0.125	0.905485
	0.119	0.983944
	0.039	0.967464
	0.05	0.796785
	0.066	0.948207
	0.249	0.722221
	0.109	0.724573
	0.023	0.874531
	0.216	0.732456
	0.021	0.962007
	0.136	1.04344
	0.28	0.683021
	0.392	0.696957
	0.043	0.8503
	0.047	0.842887
	0.021	0.786554
	0.102	0.713572
	0.079	1.01651
	0.043	0.912085
	0.1	0.704963
	0.308	0.703391
	0.103	0.884475
	0.027	0.939383
	0.081	0.982998
	0.104	0.986548
	0.143	0.721809
	0.171	0.769986
	0.053	0.902937
	0.032	0.90787
	0.04	1.00955
	0.108	0.747336
	0.034	0.906885
	0.039	0.89687
	0.039	0.716684
	0.055	1.00686
	0.271	0.582941
	0.067	0.839787
	0.142	0.698576
	0.169	0.70082
	0.144	0.98329
	0.27	0.745622
	0.132	0.65112
	0.551	0.465373
	0.066	0.862421
	0.352	0.765704
	0.159	1.02946
	0.068	0.945908
	0.041	0.844471
	0.058	0.961877
	0.12	0.981679
	0.051	0.83786
	0.208	0.992742
	0.042	0.907134
	0.035	0.815648
	0.121	0.7516
	0.044	0.976077
	0.116	0.762392
	0.046	0.908916
	0.03	0.818265
	0.054	0.792548
	0.396	0.674065
	0.212	0.933946
	0.138	0.9119
	0.02	0.773218
	0.105	0.817824
	0.055	0.802847
	0.059	0.784276
	0.291	0.625119
	0.126	0.696318
	0.039	0.814895
	0.022	0.831542
	0.043	0.900476
	0.086	1.07417
	0.598	0.555264
	0.209	0.727548
	0.085	0.933983
	0.021	0.84361
	0.049	0.867182
	0.099	0.975028
	0.048	0.905761
	0.078	0.940449
	0.067	0.91232
	0.138	0.78851
	0.229	0.621987
	0.105	0.870434
	0.079	0.722461
	0.119	0.83741
	0.057	0.982073
	0.103	0.704113
	0.046	0.932313
	0.062	0.795207
	0.261	0.699553
	0.093	0.894982
	0.438	0.631564
	0.065	0.810331
	0.038	0.893911
	0.287	0.689939
	0.04	0.776133
	0.111	0.787919
	0.056	0.791899
	0.15	0.77051
	0.231	0.724388
	0.066	0.860188
	0.034	0.73446
	0.193	0.703064
	0.438	0.624029
	0.111	0.802298
	0.046	0.842948
	0.049	0.878843
	0.026	0.87032
	0.057	0.912162
	0.049	0.927266
	0.057	0.80715
	0.113	0.803673
	0.072	0.929319
	0.084	0.70474
	0.021	0.916234
	0.279	0.725114
	0.143	0.821046
	0.078	0.944327
	0.047	0.848486
	0.466	0.698609
	0.036	0.779099
	0.113	0.848138
	0.238	0.715655
	0.028	0.909342
	0.032	0.895949
	0.036	0.96294
	0.119	0.711697
	0.083	1.04069
	0.034	1.03783
	0.025	0.840185
	0.148	0.797142
	0.056	0.74471
	0.258	0.747376
	0.295	0.605416
	0.058	0.933802
	0.087	0.81943
	0.034	0.847885
	0.045	0.882158
	0.056	0.835618
	0.079	0.855653
	0.049	0.875658
	0.067	0.744513
	0.061	0.79481
	0.079	0.906215
	0.16	0.753292
	0.262	0.682947
	0.14	0.751358
	0.068	0.862249
	0.044	0.869612
	0.041	0.824189
	0.033	0.910857
	0.032	0.891006
	0.17	0.841488
	0.307	0.821266
	0.46	0.687329
	0.218	0.723752
	0.113	0.848195
	0.083	0.818784
	0.107	0.861324
	0.173	0.695198
	0.125	0.856063
	0.053	0.802988
	0.324	0.79954
	0.08	0.836665
	0.056	0.846759
	0.294	0.755533
	0.269	0.682876
	0.062	0.760244
	0.281	0.764159
	0.063	0.818078
	0.03	0.801286
	0.028	0.828591
	0.041	0.914437
	0.024	0.838996
	0.037	0.775593
	0.05	0.868214
	0.051	0.912958
	0.106	0.760765
	0.183	0.763996
	0.065	0.927707
	0.106	0.866693
	0.03	0.708982
	0.25	0.703809
	0.035	0.922902
	0.25	0.697337
	0.072	0.916372
	0.023	0.841654
	0.036	0.818699
	0.057	0.824569
	0.505	0.721724
	0.027	0.85365
	0.063	0.799567
	0.027	0.981891
	0.047	0.82731
	0.038	0.795845
	0.208	0.832325
	0.141	0.808662
	0.069	0.782822
	0.097	0.872883
	0.091	0.90329
	0.079	0.740103
	0.043	0.875673
	0.058	0.848647
	0.043	0.988948
	0.088	0.931752
	0.118	0.873662
	0.031	0.825892
	0.094	0.887556
	0.026	0.86007
	0.096	0.884693
	0.042	0.897399
	0.185	0.847889
	0.206	0.8075
	0.101	0.860055
	0.042	0.862731
	0.023	0.95148
	0.13	0.991698
	0.202	0.855788
	0.118	0.933299
	0.024	0.90588
	0.021	0.812744
	0.027	0.912072
	0.348	0.685359
	0.045	0.870474
	0.074	0.936795
	0.145	0.834066
	0.238	0.821114
	0.054	0.84223
	0.077	0.8733
	0.048	0.945973
	0.031	0.865229
	0.172	0.791669
	0.147	0.922701
	0.224	0.908686
	0.338	0.739962
	0.077	0.845507
	0.041	0.899615
	0.094	0.919921
	0.055	0.844173
	0.028	0.831725
	0.138	0.797002
	0.034	0.845877
	0.102	0.897812
	0.03	0.876353
	0.386	0.817699
	0.119	0.955152
	0.046	0.941874
	0.023	0.90721
	0.071	0.926138
	0.046	0.972976
	0.064	0.943593
	0.034	0.858509
	0.031	1.00801
	0.254	0.816525
	0.034	0.817468
	0.031	0.897405
	0.151	0.835796
	0.049	0.908946
	0.351	0.805512
	0.038	0.877675
	0.029	0.865083
	0.02	0.821706
	0.044	0.804269
	0.032	0.844685
	0.115	0.966418
	0.076	0.935411
	0.023	0.905387
	0.06	0.983234
	0.04	0.913563
	0.099	0.848244
	0.02	0.850463
	0.075	0.956347
	0.057	0.900597
	0.131	0.912977
	0.054	0.885662
	0.079	0.859795
	0.05	0.898205
	0.09	0.901953
	0.068	1.11025
	0.04	0.900463
	0.037	0.891032
	0.033	0.850545
	0.025	0.841634
	0.042	0.852729
	0.065	0.929866
	0.044	0.806869
	0.036	0.913508
	0.082	0.901952
	0.047	0.876437
	0.088	0.843061
	0.043	0.976852
	0.024	0.863835
	0.047	0.848353
	0.044	0.844879
	0.044	0.935028
	0.138	0.939448
	0.083	0.868815
	0.103	1.00537
	0.049	0.809078
	0.085	0.834846
	0.033	0.838874
	0.075	1.04457
	0.124	0.984049
	0.093	0.965582
	0.053	0.904813
	0.03	0.830281
	0.038	0.932351
	0.076	0.878371
	0.055	0.900653
	0.05	0.953153
	0.057	0.89011
	0.052	0.946126
	0.028	0.855199
	0.032	0.831283
	0.035	0.863708
	0.033	0.973912
	0.028	0.917809
	0.035	0.827923
	0.043	0.864376
	0.091	0.859321
	0.027	0.804778
	0.032	0.825552
	0.021	1.17349
	0.028	0.902264
	0.428	1.24008
	0.037	0.899671
	0.05	0.884787
	0.033	0.815238
	0.026	0.874445
	0.079	0.961634
	0.127	1.03566
	0.067	1.08176
	0.037	0.873226
	0.034	0.864089
	0.042	0.968365
	0.033	0.932369
	0.03	0.858912
	0.073	0.870258
	0.021	0.877947
	0.031	0.863214
	0.171	1.02936
	0.065	0.836499
	0.067	0.909264
	0.022	0.836928
	0.08	0.900675
	0.051	0.945214
	0.025	0.893282
	0.057	0.854367
	0.04	0.982016
	0.143	1.18583
	0.11	0.856473
	0.064	0.893506
	0.077	0.906601
	0.062	0.946304
	0.022	0.873344
	0.044	0.927346
	0.131	0.984018
	0.03	0.835444
	0.052	0.881781
	0.03	0.842213
	0.025	0.974077
	0.073	0.969944
	0.049	1.007
	0.114	1.11733
	0.029	0.849612
	0.291	1.35678
	0.057	1.16511
	0.031	0.91532
	0.037	1.25073
	0.093	1.16234
	0.117	1.1976
	0.204	1.30894
	0.021	0.858475
	0.127	1.10424
	0.361	1.18116
	0.047	0.934262
	0.06	1.25044
	0.217	0.921497
	0.058	0.871847
	0.056	1.12556
	0.052	0.859858
	0.056	0.861906
	0.141	1.2239
	0.044	0.903491
	0.037	0.896405
	0.162	0.879096
	0.033	0.8854
	0.052	0.864085
	0.025	0.838081
	0.054	0.990248
	0.082	0.975771
	0.038	0.942398
	0.14	1.07385
	0.041	0.90129
	0.06	0.863239
	0.034	1.01527
	0.031	0.839748
	0.054	0.911664
	0.048	0.822923
	0.023	0.863695
	0.026	0.87979
	0.044	0.833698
	0.021	0.813817
	0.031	0.860766
	0.042	0.827629
	0.035	0.837081
	0.037	0.838275
	0.095	0.818897
	0.031	0.883262
	0.089	0.857884
	0.025	0.848609
	0.048	0.8549
	0.031	0.817226
	0.04	0.851274
	0.065	0.872077
	0.029	0.882657
	0.02	0.906185
	0.169	0.830852
	0.087	0.826336
	0.029	0.834183
	0.04	1.0482
	0.047	1.00442
	0.024	0.845981
	0.068	0.965062
	0.125	0.94791
	0.025	0.871999
	0.04	0.876609
	0.035	0.888077
	0.034	0.93912
	0.048	0.845873
	0.068	0.855003
	0.033	0.904225
	0.056	0.908341
	0.052	0.864967
	0.151	0.959804
	0.032	0.856109
	0.056	0.88113
	0.23	0.845054
	0.069	0.854919
	0.028	0.90828
	0.093	0.836244
	0.059	0.857785
	0.059	0.869928
	0.021	0.843667
	0.109	0.990435
	0.206	0.917553
	0.022	0.817057
	0.076	0.858925
	0.13	0.891677
	0.021	0.80755
	0.028	0.852794
	0.142	0.895434
	0.062	0.851333
	0.097	0.954989
	0.175	0.895489
	0.115	0.954807
	0.175	0.989487
	0.02	0.977334
	0.07	0.81934
	0.052	0.838328
	0.149	0.979297
	0.047	0.827951
	0.188	0.932064
	0.285	0.790448
	0.115	0.916079
	0.06	0.824284
	0.191	0.94411
	0.022	0.838908
	0.033	0.827552
	0.036	0.909815
	0.029	0.796282
	0.066	0.864595
	0.028	0.833991
	0.057	0.823203
	0.046	0.934502
	0.092	0.809058
	0.02	0.784944
	0.097	0.941442
	0.043	0.812187
	0.112	0.924188
	0.204	0.751051
	0.049	0.848639
	0.075	1.05146
	0.029	0.97305
	0.057	0.881166
	0.169	0.926024
	0.099	0.851146
	0.232	0.665323
	0.062	0.989738
	0.147	0.997306
	0.032	0.864404
	0.126	1.04365
	0.058	0.805014
	0.098	0.915037
	0.083	0.810406
	0.075	0.812903
	0.047	0.834636
	0.035	0.78923
	0.11	0.915218
	0.02	0.860173
	0.206	0.976245
	0.057	0.847818
	0.285	0.912799
	0.089	0.878356
	0.025	0.818272
	0.051	0.843073
	0.122	1.00493
	0.094	0.866389
	0.182	0.884896
	0.058	0.968286
	0.158	0.890597
	0.032	0.920158
	0.036	0.832791
	0.091	1.02389
	0.021	0.922572
	0.181	1.01352
	0.044	0.809922
	0.059	0.911299
	0.145	0.903616
	0.141	0.929823
	0.046	0.873342
	0.079	1.10041
	0.05	0.924668
	0.154	0.925003
	0.125	0.960772
	0.151	0.867736
	0.053	0.885419
	0.135	0.830341
	0.035	0.903968
	0.049	0.786204
	0.131	1.11869
	0.11	0.904854
	0.057	0.847738
	0.159	1.02706
	0.037	0.813323
	0.044	0.99792
	0.023	0.849328
	0.085	0.898889
	0.039	0.855734
	0.29	0.970007
	0.068	1.08795
	0.143	0.976876
	0.06	0.838832
	0.142	0.888665
	0.084	0.853903
	0.125	0.889679
	0.044	1.03451
	0.025	0.773284
	0.191	0.914045
	0.09	0.823578
	0.025	0.965654
	0.038	0.885118
	0.163	0.987496
	0.037	0.934526
	0.029	0.851879
	0.055	0.852298
	0.079	0.999274
	0.035	0.806748
	0.264	0.651792
	0.035	0.830017
	0.02	0.870712
	0.02	0.947512
	0.049	0.879553
	0.159	0.953711
	0.083	0.979456
	0.031	0.844958
	0.105	0.811372
	0.046	0.964274
	0.023	0.805127
	0.081	0.993071
	0.196	0.891287
	0.048	0.822161
	0.02	0.87472
	0.086	0.946264
	0.049	0.983045
	0.043	0.82987
	0.091	0.900258
	0.224	0.706598
	0.075	0.846106
	0.079	0.792551
	0.082	0.934021
	0.121	0.999973
	0.025	0.852513
	0.148	0.977035
	0.085	0.840964
	0.029	0.806556
	0.084	0.94681
	0.042	0.953147
	0.069	0.807867
	0.047	0.832122
	0.087	0.989964
	0.02	0.947635
	0.061	0.861253
	0.072	0.862965
	0.038	0.84921
	0.044	0.883864
	0.028	0.941664
	0.134	0.972724
	0.083	0.821353
	0.11	0.945528
	0.077	0.931125
	0.15	0.906394
	0.094	0.988199
	0.088	0.928076
	0.092	1.11911
	0.045	0.926757
	0.101	0.901207
	0.079	0.86892
	0.064	0.974892
	0.047	1.0422
	0.053	0.863981
	0.108	0.892806
	0.096	0.872269
	0.037	0.816492
	0.202	0.449648
	0.051	0.900837
	0.029	0.982408
	0.066	0.807557
	0.04	0.894899
	0.365	0.751502
	0.118	0.972032
	0.112	0.859545
	0.082	0.896395
	0.031	0.90936
	0.021	0.851191
	0.145	1.04017
	0.125	0.995343
	0.068	0.911617
	0.109	0.769273
	0.117	0.934417
	0.041	0.851155
	0.02	0.833933
	0.179	1.05183
	0.155	0.980396
	0.045	0.871492
	0.029	0.831176
	0.037	0.826903
	0.404	0.658525
	0.473	1.1949
	0.025	0.83038
	0.033	0.882804
	0.033	0.885257
	0.739	0.600493
	0.162	1.02259
	0.207	0.988628
	0.031	0.82878
	0.077	0.813963
	0.041	0.825154
	0.18	0.965693
	0.072	0.796867
	0.089	0.953671
	0.039	0.815585
	0.141	0.70956
	0.115	0.910142
	0.178	0.965793
	0.382	0.558798
	0.083	0.866328
	0.08	0.914372
	0.135	0.76347
	0.108	0.829937
	0.066	0.917028
	0.1	0.759582
	0.157	0.869486
	0.757	0.676833
	0.024	0.828335
	0.082	0.745591
	0.04	0.845899
	0.037	0.803069
	0.067	0.897997
	0.026	0.810569
	0.096	0.795179
	0.038	0.797518
	0.026	0.810616
	0.155	1.03042
	0.037	0.845476
	0.111	0.940829
	0.114	0.824027
	0.147	0.688332
	0.022	0.801852
	0.059	0.927064
	0.427	0.693058
	0.022	0.832651
	0.039	0.847105
	0.05	0.842933
	0.095	0.946192
	0.034	0.913129
	0.05	0.855891
	0.042	0.881968
	0.052	0.814728
	0.122	0.840229
	0.18	0.90729
	0.058	0.866695
	0.035	0.796092
	0.025	0.82399
	0.076	0.978705
	0.075	0.905447
	0.179	0.938368
	0.061	0.78783
	0.061	0.995235
	0.068	0.80771
	0.047	0.930767
	0.066	0.757187
	0.031	0.90826
	0.136	0.726214
	0.026	0.84515
	0.067	0.825065
	0.09	0.906741
	0.07	0.842412
	0.045	0.861735
	0.107	0.898601
	0.09	0.950567
	0.07	0.852135
	0.126	0.85767
	0.044	0.9442
	0.046	0.901296
	0.654	0.508286
	0.07	0.938686
	0.142	0.881099
	0.114	0.828
	0.075	0.742808
	0.055	0.815614
	0.072	0.851468
	0.024	0.890763
	0.087	0.940006
	0.022	0.80993
	0.069	0.874127
	0.199	0.958586
	0.083	0.974591
	0.034	0.876476
	0.03	0.82136
	0.073	0.808425
	0.078	0.878887
	0.022	0.899181
	0.126	0.944312
	0.021	0.869536
	0.04	0.870071
	0.034	0.936408
	0.023	0.895365
	0.036	0.8025
	0.063	0.807842
	0.178	0.854472
	0.102	1.01409
	0.435	0.592515
	0.238	0.90698
	0.047	0.769457
	0.217	0.816989
	0.039	0.834327
	0.128	0.639173
	0.07	0.872808
	0.133	0.993849
	0.024	0.784964
	0.033	0.790131
	0.107	0.964279
	0.226	0.973766
	0.107	1.00933
	0.092	0.812962
	0.033	0.951311
	1.194	0.634802
	0.047	0.779792
	0.105	0.967318
	0.087	0.821574
	0.025	0.760106
	0.024	0.842859
	0.047	0.884726
	0.034	1.02984
	0.028	0.862588
	0.104	0.791656
	0.171	0.853277
	0.186	0.944793
	0.03	0.837374
	0.047	0.937083
	0.037	0.85746
	0.066	0.792224
	0.131	0.97251
	0.063	0.834455
	0.569	0.592154
	0.102	0.620059
	0.343	0.733117
	0.043	0.845481
	0.106	0.811147
	0.343	0.751682
	0.068	0.861873
	0.056	0.820867
	0.085	0.84025
	0.717	0.642267
	0.088	0.798577
	0.064	0.811941
	0.048	0.854942
	0.087	0.966066
	0.057	1.02715
	0.023	0.828785
	0.033	0.864783
	0.207	0.797825
	0.145	1.06232
	0.036	0.881075
	0.059	0.801404
	0.028	0.83521
	0.102	0.785641
	0.037	0.847788
	0.193	0.972268
	0.088	0.759918
	0.026	0.802147
	0.062	0.827401
	0.028	0.845233
	0.021	0.806075
	0.077	0.812582
	0.185	0.904281
	0.078	1.00955
	0.042	0.938012
	0.142	0.693902
	0.089	1.06776
	0.148	0.905206
	0.116	0.85453
	0.432	0.679344
	0.041	0.864863
	0.041	0.871733
	0.175	0.878881
	0.074	0.788131
	0.057	1.0326
	0.053	0.846543
	0.074	0.791547
	0.097	0.78176
	0.125	0.831765
	0.063	0.80623
	0.897	0.455294
	0.307	0.678784
	0.136	0.89505
	0.044	0.922998
	0.069	0.821978
	0.058	1.05322
	0.021	0.845683
	0.179	0.792696
	0.047	0.909503
	0.027	0.858058
	0.056	0.85262
	0.09	0.806332
	0.098	0.800543
	0.142	0.810818
	0.048	0.947305
	0.022	0.835171
	0.09	0.859078
	0.116	0.980447
	0.026	0.804765
	0.026	0.907062
	0.193	0.760482
	0.117	0.991804
	0.072	0.828144
	0.055	0.807382
	0.191	0.874845
	0.223	0.959138
	0.11	0.851289
	0.182	0.834977
	0.175	0.950805
	0.174	0.809267
	0.021	0.861269
	0.102	0.94058
	0.063	0.79491
	0.045	0.806198
	0.021	0.740102
	0.105	0.928439
	0.196	0.950359
	0.203	0.615365
	0.12	0.817065
	0.079	0.864363
	0.028	0.827369
	0.044	0.78549
	0.17	0.933384
	0.04	0.789966
	0.022	0.852421
	0.83	0.470162
	0.073	0.800685
	0.057	0.862366
	0.127	0.844766
	0.222	0.676104
	0.04	0.793326
	0.131	0.917856
	0.021	0.895653
	0.05	0.836409
	0.131	0.91031
	0.021	0.804645
	0.097	0.893109
	0.021	0.858098
	0.057	0.649814
	0.379	1.05204
	0.088	0.898898
	0.043	0.813837
	0.381	0.526094
	0.023	0.837902
	0.069	0.954843
	0.07	0.896553
	0.047	0.828062
	0.057	0.818653
	0.195	0.80834
	0.068	0.814437
	0.126	0.824415
	0.114	0.801968
	0.079	1.05307
	0.135	0.94043
	0.144	0.934342
	0.047	0.935917
	0.032	0.874469
	0.034	0.788401
	0.163	0.765875
	0.126	0.956595
	0.057	0.868921
	0.177	0.776432
	0.078	0.862711
	0.031	1.01935
	0.034	0.974847
	0.023	0.834658
	0.045	0.847817
	0.071	0.955747
	0.054	0.876176
	0.142	0.881984
	0.028	0.964201
	0.104	0.738162
	0.029	0.824364
	0.055	0.867613
	0.105	0.831264
	0.082	0.853633
	0.103	0.814294
	0.026	0.838706
	0.168	1.12862
	0.056	0.848024
	0.025	0.837984
	0.23	0.784442
	0.241	0.812501
	0.113	0.773955
	0.102	0.803957
	0.198	0.741197
	0.079	0.801057
	0.065	0.867139
	0.241	0.892504
	0.273	0.678411
	0.118	0.823215
	0.13	1.00349
	0.034	0.843644
	0.038	0.868237
	0.037	0.808904
	0.021	0.849294
	0.102	0.856742
	0.135	0.931578
	0.043	0.920318
	0.051	0.785933
	0.118	0.875282
	0.071	0.930607
	0.046	0.837252
	0.238	1.02653
	0.133	0.913914
	0.041	0.81142
	0.56	0.553238
	0.038	0.822717
	0.045	0.839474
	0.198	0.763829
	0.027	0.928517
	0.041	0.869602
	0.732	0.66475
	0.08	0.875278
	0.495	0.566597
	0.08	0.857954
	0.43	0.601069
	0.055	0.812942
	0.034	0.832564
	0.252	0.803807
	0.398	0.656655
	0.063	0.768774
	0.071	0.90622
	0.197	0.894859
	0.231	0.724779
	0.176	0.912045
	0.024	0.828104
	0.167	0.750441
	0.359	0.640359
	0.08	0.945602
	0.04	0.808945
	0.474	0.59854
	0.109	0.797823
	0.092	0.951884
	0.056	0.885405
	0.023	0.858646
	0.045	0.848648
	0.138	1.03107
	0.031	0.820035
	0.605	0.581535
	0.286	0.559274
	0.139	0.97825
	0.027	0.861935
	0.022	0.816095
	0.039	0.834775
	0.108	0.870172
	0.791	0.626855
	0.093	0.831735
	0.23	0.800003
	0.034	0.84558
	0.748	0.581059
	0.254	0.744448
	0.033	0.907962
	0.305	0.908048
	0.023	0.805423
	0.032	0.922969
	0.47	0.590755
	0.306	0.727871
	0.189	0.804153
	0.048	0.802331
	0.061	0.887542
	0.1	0.847217
	0.029	0.883628
	0.029	0.915174
	0.088	0.801792
	0.029	0.862722
	0.144	0.907277
	0.027	0.876855
	0.024	0.931078
	0.096	0.853413
	0.083	0.87998
	0.03	0.84687
	0.05	0.834925
	0.086	0.724677
	0.1	0.823804
	0.034	0.84213
	0.141	0.840573
	0.123	0.897701
	0.034	0.772
	0.099	0.888993
	0.402	0.624474
	0.023	0.820786
	0.202	0.794472
	0.073	0.896529
	0.137	0.944715
	0.395	0.668316
	0.037	0.862885
	0.19	0.962088
	0.029	0.835692
	0.109	0.906002
	0.094	0.826072
	0.04	0.812231
	0.024	0.822229
	0.133	0.778448
	0.038	0.854524
	0.231	0.961622
	0.092	0.900791
	0.051	0.818454
	0.136	0.788051
	0.085	1.01771
	0.193	0.75742
	0.18	0.638316
	0.03	0.845049
	0.053	0.815051
	0.102	0.900217
	0.066	0.984871
	0.031	0.89097
	0.143	1.00401
	0.074	0.925522
	0.057	0.805783
	0.028	0.967454
	0.221	0.929282
	0.03	0.854558
	0.066	0.835963
	0.035	0.823791
	0.026	0.846259
	0.066	0.781803
	0.166	0.657661
	0.393	0.714882
	0.17	0.926096
	0.107	0.778394
	0.207	0.935904
	0.034	0.826463
	0.045	0.670026
	0.102	1.01507
	0.061	0.963202
	0.021	0.86459
	0.351	0.78303
	0.092	1.01501
	0.084	0.646375
	0.056	1.01903
	0.031	0.838448
	0.021	0.812083
	0.113	0.918123
	0.222	0.719281
	0.132	0.80094
	0.102	0.857318
	0.203	0.588502
	0.356	0.678928
	0.056	0.850466
	0.104	1.03226
	0.06	0.947231
	0.043	0.818401
	0.632	0.629684
	0.145	0.991271
	0.302	0.652232
	0.15	0.794138
	0.057	0.746875
	0.039	0.873782
	0.125	0.927302
	0.126	0.76529
	0.063	0.846022
	0.052	0.827625
	0.224	0.861645
	0.122	0.738553
	0.056	0.995086
	0.078	0.977462
	0.117	0.919585
	0.051	0.987866
	0.131	0.722488
	0.102	0.769919
	0.029	0.813298
	0.055	0.786188
	0.021	0.811013
	0.05	0.826972
	0.02	0.840958
	0.104	0.909218
	0.31	0.697022
	0.02	0.838766
	0.039	0.959606
	0.07	0.896336
	0.239	0.71788
	0.028	0.815697
	0.021	0.788484
	0.079	0.902599
	0.17	0.864341
	0.183	0.735094
	0.107	0.829654
	0.029	0.801348
	0.12	1.02739
	0.367	0.629093
	0.147	0.841753
	0.027	0.849464
	0.071	0.928829
	0.022	0.808855
	0.125	0.757738
	0.026	0.788152
	0.043	0.892408
	0.021	0.821099
	0.139	0.815423
	0.044	0.81693
	0.051	0.771525
	0.083	0.809731
	0.052	0.808154
	0.051	0.840661
	0.071	0.922874
	0.055	0.869849
	0.049	0.807349
	0.022	0.785414
	0.099	0.88399
	0.094	0.831349
	0.043	0.803302
	0.048	0.817633
	0.074	0.939415
	0.042	0.856159
	0.096	0.808418
	0.153	0.993749
	0.138	0.9799
	0.053	0.967238
	0.076	0.816756
	0.057	0.930122
	0.036	0.796452
	0.047	0.841963
	0.179	0.918
	0.033	0.872033
	0.034	0.862926
	0.036	0.985273
	0.155	0.760043
	0.111	0.925126
	0.025	0.951454
	0.17	0.91775
	0.05	0.877633
	0.156	0.913185
	0.204	0.988391
	0.043	0.80693
	0.142	1.11959
	0.029	0.857141
	0.051	0.82423
	0.129	0.831483
	0.051	0.888616
	0.205	0.803437
	0.057	0.846621
	0.046	0.807105
	0.081	0.904333
	0.112	0.849983
	0.078	0.857727
	0.21	0.742867
	0.034	0.883955
	0.06	0.792121
	0.044	0.884258
	0.093	0.975225
	0.025	0.926713
	0.087	0.803256
	0.024	0.837315
	0.067	0.963887
	0.041	0.825854
	0.059	0.754149
	0.06	0.839286
	0.058	0.837474
	0.041	0.814807
	0.032	0.879032
	0.05	0.934779
	0.048	0.838281
	0.044	0.911214
	0.189	0.883787
	0.062	0.811183
	0.402	0.581121
	0.021	0.831069
	0.084	0.827847
	0.031	0.882989
	0.083	0.795987
	0.02	0.785439
	0.043	0.814052
	0.094	0.841469
	0.182	0.629997
	0.027	0.841579
	0.117	0.954471
	0.034	0.910086
	0.057	0.963645
	0.022	0.982899
	0.04	0.829801
	0.158	0.973981
	0.044	0.894733
	0.052	0.905306
	0.149	0.919158
	0.191	0.692511
	0.094	0.893072
	0.027	0.842613
	0.146	1.04405
	0.039	0.788041
	0.2	0.766624
	0.036	0.862283
	0.081	0.787136
	0.58	1.02748
	0.073	0.944651
	0.055	0.793571
	0.048	0.809834
	0.032	0.925936
	0.098	0.783597
	0.079	1.0166
	0.064	0.969083
	0.05	0.713584
	0.115	0.76239
	0.086	0.915912
	0.05	0.763882
	0.076	0.663276
	0.028	0.882002
	0.036	0.795316
	0.095	0.724121
	0.059	0.852773
	0.241	0.767543
	0.033	0.854431
	0.02	0.873218
	0.186	0.691291
	0.034	0.815012
	0.023	0.771773
	0.076	0.955422
	0.217	0.751033
	0.212	1.16495
	0.141	0.928208
	0.272	0.762529
	0.037	0.910095
	0.18	0.822694
	0.032	0.856816
	0.229	1.13696
	0.044	0.809027
[truncated: 1,742 more rows]

## Sheet:  Panel I+J
	Panel I: Comparison of puncta size distributions of gephyrin WT and gephyrin S268A/S270A mutant mice across hippocampal CA1 layers														Panel J: Comparison of median puncta size of gephyrin WT and gephyrin S268A/S270A mutant mice across hippocampal CA1 layers
	Gephyrin WT					Gephyrin S268A/S270A
	Pooled values across individuals					Pooled values across individuals									Median gephyrin puncta size													Statistical analysis
	Oriens	Pyramidale	Radiatum	S.L.M.		Oriens	Pyramidale	Radiatum	S.L.M.							WT						S268A/S270A						Mixed-effects model (REML)	Matching: Across row
	0.02	0.057	0.057	0.077		0.026	0.042	0.037	0.063						Oriens	0.07	0.0965	0.108333	0.101667	0.098833	0.080667	0.122	0.142167	0.132	0.131667	0.129667		Assume sphericity?	Yes
	0.123	0.23	0.23	0.07		0.079	0.041	0.031	0.286						Pyramidale	0.0615	0.081667	0.088167	0.08	0.083	0.07	0.093333	0.1105	0.105167	0.104333	0.114		Alpha	0.05
	0.048	0.152	0.152	0.042		0.179	0.131	0.038	0.279						Radiatum	0.061	0.079667	0.093667	0.084667	0.083333	0.067	0.1	0.132333	0.119333	0.118833	0.121333
	0.092	0.604	0.604	0.028		0.197	0.067	0.026	0.257						SLM	0.082	0.124667	0.135333	0.13	0.128333	0.115333	0.152	0.155667	0.152	0.164	0.170667		Fixed effects (type III)	P value	P value summary	Statistically significant (P < 0,05)?	F (DFn, DFd)
	0.065	0.087	0.087	0.072		0.057	0.121	0.102	0.137																			Layer	<0,0001	****	Yes	F (3, 20) = 23,51
	0.107	0.09	0.09	0.037		0.264	0.219	0.079	0.108																			Genotype	<0,0001	****	Yes	F (1, 16) = 166,0
	0.073	0.027	0.027	0.17		0.05	0.065	0.079	0.056																			Layer x Genotype	0.4004	ns	No	F (3, 16) = 1,043
	0.034	0.05	0.05	0.068		0.114	0.039	0.109	0.287
	0.307	0.158	0.158	0.043		0.155	0.038	0.028	0.307																			Random effects	SD	Variance
	0.086	0.036	0.036	0.058		0.032	0.096	0.081	0.11																			Row Factor	0.008234	6.78e-05
	0.069	0.127	0.127	0.047		0.042	0.058	0.022	0.05																			Residual	0.009012	8.122e-05
	0.056	0.096	0.096	0.163		0.048	0.148	0.061	0.033
	0.246	0.185	0.185	0.065		0.127	0.087	0.07	0.22																			Was the matching effective?
	0.22	0.081	0.081	0.064		0.063	0.042	0.065	0.116																			Chi-square, df	3,971, 1
	0.285	0.108	0.108	0.132		0.199	0.136	0.131	0.16																			P value	0.0463
	0.032	0.056	0.056	0.117		0.079	0.175	0.021	0.097																			P value summary	*
	0.083	0.089	0.089	0.073		0.158	0.284	0.068	0.051																			Is there significant matching (P < 0.05)?	Yes
	0.541	0.099	0.099	0.065		0.062	0.046	0.03	0.084
	0.135	0.057	0.057	0.274		0.047	0.063	0.132	0.045																			Difference between column means
	0.125	0.049	0.049	0.065		0.106	0.048	0.049	0.183																			Predicted mean of WT	0.09189
	0.275	0.074	0.074	0.157		0.149	0.47	0.112	0.144																			Predicted mean of MUT	0.1278
	0.116	0.09	0.09	0.133		0.043	0.116	0.114	0.034																			Difference between predicted means	-0.03588
	0.073	0.037	0.037	0.062		0.138	0.278	0.024	0.24																			SE of difference	0.002784
	0.14	0.03	0.03	0.06		0.078	0.238	0.033	0.167																			95% CI of difference	-0,04178 to -0,02997
	0.077	0.07	0.07	0.134		0.167	0.191	0.067	0.127
	0.101	0.02	0.02	0.079		0.232	0.131	0.067	0.067																			Data summary
	0.217	0.048	0.048	0.06		0.056	0.049	0.154	0.195																			Number of columns (Genotype)	2
	0.102	0.037	0.037	0.11		0.104	0.04	0.265	0.225																			Number of rows (Layer)	4
	0.157	0.089	0.089	0.04		0.109	0.082	0.037	0.172																			Number of subjects (Row Factor)	24
	0.129	0.065	0.065	0.09		0.098	0.101	0.035	0.165																			Number of missing values	4
	0.101	0.044	0.044	0.111		0.067	0.096	0.037	0.548
	0.084	0.114	0.114	0.035		0.298	0.022	0.101	0.208																			Compare row means (main row effect)
	0.083	0.137	0.137	0.079		0.127	0.151	0.111	0.02
	0.044	0.055	0.055	0.051		0.141	0.078	0.066	0.027																			Number of families	1
	0.11	0.055	0.055	0.105		0.087	0.07	0.05	0.087																			Number of comparisons per family	6
	0.077	0.092	0.092	0.035		0.081	0.02	0.041	0.105																			Alpha	0.05
	0.02	0.089	0.089	0.029		0.132	0.112	0.087	0.1
	0.05	0.228	0.228	0.121		0.325	0.061	0.102	0.101																			Sidak's multiple comparisons test	Predicted (LS) mean diff,	95,00% CI of diff,	Significant?	Summary	Adjusted P Value
	0.226	0.14	0.14	0.095		0.206	0.082	0.114	0.15
	0.156	0.033	0.033	0.12		0.139	0.039	0.024	0.226																			Oriens vs. Pyramidale	0.02045	0,002436 to 0,03846	Yes	*	0.0207
	0.189	0.054	0.054	0.049		0.028	0.079	0.028	0.19																			Oriens vs. Radiatum	0.01375	-0,004256 to 0,03176	No	ns	0.205
	0.167	0.047	0.047	0.209		0.402	0.098	0.1	0.153																			Oriens vs. SLM	-0.02736	-0,04537 to -0,009345	Yes	**	0.0015
	0.162	0.044	0.044	0.041		0.027	0.051	0.097	0.141																			Pyramidale vs. Radiatum	-0.006692	-0,02470 to 0,01132	No	ns	0.8732
	0.077	0.059	0.059	0.084		0.306	0.093	0.054	0.258																			Pyramidale vs. SLM	-0.0478	-0,06581 to -0,02979	Yes	****	<0,0001
	0.152	0.112	0.112	0.027		0.034	0.034	0.046	0.186																			Radiatum vs. SLM	-0.04111	-0,05912 to -0,02310	Yes	****	<0,0001
	0.125	0.151	0.151	0.034		0.035	0.078	0.034	0.027
	0.152	0.081	0.081	0.036		0.071	0.083	0.029	0.045
	0.087	0.034	0.034	0.116		0.112	0.505	0.096	0.294																			Test details	Predicted (LS) mean 1	Predicted (LS) mean 2	Predicted (LS) mean diff,	SE of diff,	N1	N2	t	DF
	0.144	0.077	0.077	0.046		0.335	0.057	0.043	0.185
	0.168	0.079	0.079	0.154		0.063	0.193	0.094	0.282																			Oriens vs. Pyramidale	0.1115	0.09109	0.02045	0.006173	11	11	3.312	20
	0.156	0.027	0.027	0.195		0.15	0.239	0.192	0.163																			Oriens vs. Radiatum	0.1115	0.09778	0.01375	0.006173	11	11	2.228	20
	0.152	0.486	0.486	0.057		0.052	0.166	0.15	0.367																			Oriens vs. SLM	0.1115	0.1389	-0.02736	0.006173	11	11	4.432	20
	0.083	0.043	0.043	0.046		0.043	0.114	0.068	0.207																			Pyramidale vs. Radiatum	0.09109	0.09778	-0.006692	0.006173	11	11	1.084	20
	0.241	0.187	0.187	0.023		0.202	0.107	0.065	0.022																			Pyramidale vs. SLM	0.09109	0.1389	-0.0478	0.006173	11	11	7.744	20
	0.313	0.041	0.041	0.101		0.172	0.171	0.023	0.247																			Radiatum vs. SLM	0.09778	0.1389	-0.04111	0.006173	11	11	6.66	20
	0.148	0.043	0.043	0.094		0.229	0.113	0.088	0.042
	0.242	0.058	0.058	0.072		0.063	0.044	0.039	0.182																			Compare each cell mean with the other cell mean in that row
	0.203	0.06	0.06	0.074		0.093	0.047	0.073	0.034
	0.111	0.107	0.107	0.124		0.246	0.254	0.086	0.168																			Number of families	1
	0.08	0.032	0.032	0.118		0.293	0.162	0.05	0.14																			Number of comparisons per family	4
	0.028	0.025	0.025	0.07		0.212	0.189	0.193	0.15																			Alpha	0.05
	0.066	0.12	0.12	0.043		0.191	0.109	0.11	0.085
	0.146	0.06	0.06	0.116		0.196	0.096	0.038	0.095																			Sidak's multiple comparisons test	Predicted (LS) mean diff,	95,00% CI of diff,	Significant?	Summary	Adjusted P Value
	0.199	0.077	0.077	0.052		0.057	0.179	0.049	0.074
	0.311	0.236	0.236	0.023		0.046	0.513	0.034	0.181																			WT - MUT
	0.386	0.067	0.067	0.06		0.183	0.193	0.099	0.18																			Oriens	-0.03774	-0,05336 to -0,02213	Yes	****	<0,0001
	0.089	0.103	0.103	0.076		0.184	0.381	0.148	0.097																			Pyramidale	-0.02741	-0,04302 to -0,01179	Yes	***	0.0006
	0.092	0.332	0.332	0.148		0.108	0.087	0.021	0.18																			Radiatum	-0.03912	-0,05474 to -0,02351	Yes	****	<0,0001
	0.129	0.073	0.073	0.027		0.102	0.108	0.103	0.027																			SLM	-0.03923	-0,05484 to -0,02362	Yes	****	<0,0001
	0.167	0.029	0.029	0.101		0.061	0.123	0.077	0.122
	0.03	0.043	0.043	0.059		0.126	0.104	0.068	0.137
	0.375	0.054	0.054	0.098		0.059	0.057	0.024	0.077																			Test details	Predicted (LS) mean 1	Predicted (LS) mean 2	Predicted (LS) mean diff,	SE of diff,	N1	N2
	0.119	0.09	0.09	0.099		0.141	0.089	0.021	0.082
	0.126	0.026	0.026	0.036		0.476	0.047	0.021	0.313																			WT - MUT
	0.122	0.128	0.128	0.084		0.185	0.202	0.036	0.261																			Oriens	0.09267	0.1304	-0.03774	0.005569	6	5
	0.057	0.157	0.157	0.034		0.037	0.091	0.058	0.056																			Pyramidale	0.07739	0.1048	-0.02741	0.005569	6	5
	0.121	0.14	0.14	0.098		0.224	0.057	0.032	0.331																			Radiatum	0.07822	0.1173	-0.03912	0.005569	6	5
	0.185	0.09	0.09	0.036		0.115	0.214	0.104	0.221																			SLM	0.1193	0.1585	-0.03923	0.005569	6	5
	0.058	0.034	0.034	0.055		0.328	0.04	0.128	0.033
	0.084	0.051	0.051	0.059		0.086	0.113	0.118	0.106
	0.132	0.04	0.04	0.238		0.152	0.078	0.068	0.083
	0.078	0.079	0.079	0.085		0.136	0.27	0.085	0.092
	0.092	0.125	0.125	0.146		0.095	0.102	0.202	0.133
	0.148	0.102	0.102	0.07		0.17	0.17	0.041	0.323
	0.043	0.102	0.102	0.029		0.17	0.239	0.048	0.08
	0.109	0.076	0.076	0.09		0.279	0.078	0.047	0.264
	0.121	0.176	0.176	0.027		0.505	0.079	0.156	0.193
	0.034	0.15	0.15	0.071		0.04	0.284	0.108	0.179
	0.135	0.079	0.079	0.086		0.289	0.148	0.033	0.088
	0.136	0.066	0.066	0.079		0.111	0.111	0.089	0.038
	0.035	0.094	0.094	0.134		0.053	0.066	0.151	0.241
	0.054	0.037	0.037	0.022		0.043	0.076	0.183	0.184
	0.097	0.026	0.026	0.021		0.138	0.147	0.071	0.223
	0.057	0.097	0.097	0.061		0.143	0.153	0.049	0.165
	0.345	0.054	0.054	0.024		0.154	0.178	0.072	0.248
	0.09	0.047	0.047	0.086		0.2	0.075	0.034	0.119
	0.04	0.03	0.03	0.214		0.145	0.198	0.02	0.151
	0.08	0.24	0.24	0.041		0.179	0.138	0.067	0.286
	0.196	0.02	0.02	0.079		0.087	0.182	0.044	0.149
	0.04	0.042	0.042	0.033		0.054	0.136	0.106	0.213
	0.123	0.088	0.088	0.064		0.125	0.158	0.028	0.114
	0.057	0.059	0.059	0.121		0.051	0.143	0.125	0.179
	0.051	0.06	0.06	0.045		0.18	0.199	0.057	0.089
	0.063	0.076	0.076	0.116		0.073	0.18	0.05	0.191
	0.02	0.027	0.027	0.021		0.048	0.028	0.102	0.101
	0.212	0.031	0.031	0.021		0.061	0.062	0.05	0.112
	0.109	0.038	0.038	0.034		0.079	0.135	0.024	0.142
	0.142	0.058	0.058	0.107		0.031	0.093	0.09	0.022
	0.112	0.056	0.056	0.129		0.125	0.228	0.103	0.241
	0.048	0.127	0.127	0.054		0.095	0.244	0.077	0.195
	0.059	0.085	0.085	0.022		0.111	0.102	0.021	0.02
	0.176	0.022	0.022	0.065		0.148	0.025	0.083	0.212
	0.064	0.022	0.022	0.068		0.08	0.152	0.057	0.288
	0.073	0.108	0.108	0.09		0.092	0.027	0.098	0.206
	0.251	0.02	0.02	0.072		0.056	0.186	0.034	0.056
	0.176	0.032	0.032	0.043		0.128	0.282	0.095	0.152
	0.072	0.077	0.077	0.185		0.032	0.157	0.026	0.058
	0.152	0.027	0.027	0.116		0.186	0.224	0.034	0.07
	0.179	0.053	0.053	0.034		0.159	0.168	0.096	0.19
	0.119	0.136	0.136	0.165		0.091	0.231	0.061	0.155
	0.052	0.061	0.061	0.041		0.544	0.041	0.058	0.249
	0.064	0.091	0.091	0.1		0.058	0.053	0.045	0.214
	0.111	0.086	0.086	0.048		0.051	0.125	0.041	0.041
	0.141	0.056	0.056	0.085		0.211	0.028	0.125	0.184
	0.055	0.023	0.023	0.139		0.109	0.103	0.118	0.116
	0.097	0.119	0.119	0.05		0.197	0.359	0.141	0.18
	0.173	0.15	0.15	0.077		0.253	0.139	0.042	0.088
	0.117	0.039	0.039	0.068		0.337	0.057	0.03	0.159
	0.05	0.164	0.164	0.048		0.202	0.035	0.064	0.11
	0.092	0.08	0.08	0.079		0.184	0.125	0.059	0.148
	0.197	0.027	0.027	0.034		0.171	0.036	0.06	0.094
	0.121	0.021	0.021	0.055		0.036	0.279	0.08	0.101
	0.028	0.289	0.289	0.213		0.151	0.058	0.039	0.264
	0.099	0.398	0.398	0.17		0.04	0.069	0.044	0.262
	0.026	0.136	0.136	0.06		0.176	0.135	0.023	0.255
	0.189	0.125	0.125	0.057		0.272	0.089	0.04	0.105
	0.068	0.02	0.02	0.036		0.183	0.023	0.14	0.138
	0.109	0.029	0.029	0.111		0.148	0.045	0.027	0.164
	0.029	0.063	0.063	0.068		0.177	0.117	0.058	0.023
	0.063	0.046	0.046	0.162		0.17	0.372	0.1	0.035
	0.061	0.043	0.043	0.065		0.039	0.046	0.042	0.241
	0.238	0.09	0.09	0.141		0.134	0.146	0.14	0.024
	0.107	0.074	0.074	0.182		0.182	0.429	0.049	0.232
	0.269	0.087	0.087	0.134		0.339	0.043	0.029	0.071
	0.291	0.094	0.094	0.12		0.147	0.084	0.03	0.032
	0.034	0.06	0.06	0.028		0.034	0.13	0.05	0.044
	0.272	0.058	0.058	0.082		0.199	0.256	0.106	0.073
	0.124	0.065	0.065	0.071		0.022	0.212	0.051	0.133
	0.029	0.084	0.084	0.106		0.124	0.272	0.063	0.137
	0.102	0.062	0.062	0.087		0.256	0.132	0.025	0.155
	0.148	0.029	0.029	0.235		0.334	0.24	0.058	0.263
	0.077	0.054	0.054	0.136		0.127	0.261	0.098	0.129
	0.098	0.021	0.021	0.099		0.079	0.059	0.115	0.252
	0.284	0.146	0.146	0.124		0.038	0.227	0.093	0.354
	0.423	0.032	0.032	0.12		0.031	0.079	0.074	0.174
	0.058	0.091	0.091	0.08		0.049	0.203	0.034	0.215
	0.079	0.026	0.026	0.154		0.14	0.309	0.04	0.214
	0.123	0.082	0.082	0.127		0.135	0.29	0.064	0.575
	0.059	0.091	0.091	0.059		0.102	0.066	0.038	0.029
	0.056	0.038	0.038	0.077		0.06	0.275	0.052	0.036
	0.449	0.047	0.047	0.149		0.08	0.102	0.038	0.129
	0.074	0.118	0.118	0.023		0.128	0.034	0.156	0.819
	0.082	0.051	0.051	0.117		0.091	0.029	0.042	0.157
	0.047	0.079	0.079	0.036		0.255	0.08	0.155	0.032
	0.031	0.032	0.032	0.041		0.34	0.125	0.141	0.166
	0.117	0.087	0.087	0.044		0.047	0.042	0.083	0.262
	0.101	0.075	0.075	0.132		0.052	0.262	0.036	0.268
	0.027	0.086	0.086	0.085		0.045	0.119	0.036	0.044
	0.122	0.065	0.065	0.085		0.077	0.288	0.137	0.113
	0.12	0.056	0.056	0.036		0.239	0.057	0.059	0.25
	0.102	0.037	0.037	0.133		0.098	0.049	0.077	0.081
	0.046	0.08	0.08	0.026		0.047	0.085	0.059	0.203
	0.049	0.109	0.109	0.056		0.157	0.116	0.043	0.148
	0.183	0.066	0.066	0.052		0.07	0.02	0.068	0.105
	0.102	0.085	0.085	0.098		0.049	0.1	0.057	0.411
	0.029	0.086	0.086	0.077		0.021	0.031	0.074	0.103
	0.036	0.021	0.021	0.08		0.166	0.096	0.044	0.088
	0.067	0.132	0.132	0.194		0.026	0.146	0.025	0.057
	0.56	0.046	0.046	0.115		0.034	0.222	0.078	0.045
	0.233	0.062	0.062	0.02		0.054	0.127	0.025	0.111
	0.112	0.025	0.025	0.02		0.038	0.074	0.085	0.177
	0.03	0.097	0.097	0.23		0.128	0.054	0.041	0.354
	0.101	0.057	0.057	0.087		0.039	0.031	0.12	0.149
	0.077	0.043	0.043	0.056		0.268	0.129	0.091	0.274
	0.25	0.06	0.06	0.092		0.126	0.088	0.037	0.142
	0.079	0.042	0.042	0.125		0.138	0.023	0.032	0.378
	0.407	0.026	0.026	0.025		0.149	0.113	0.085	0.136
	0.042	0.073	0.073	0.047		0.142	0.085	0.233	0.112
	0.042	0.124	0.124	0.114		0.142	0.106	0.092	0.042
	0.054	0.07	0.07	0.099		0.124	0.039	0.233	0.103
	0.05	0.033	0.033	0.038		0.07	0.034	0.057	0.091
	0.094	0.088	0.088	0.078		0.212	0.115	0.045	0.178
	0.087	0.04	0.04	0.168		0.163	0.114	0.04	0.141
	0.096	0.029	0.029	0.037		0.042	0.197	0.148	0.143
	0.047	0.057	0.057	0.079		0.325	0.129	0.054	0.154
	0.177	0.033	0.033	0.046		0.079	0.124	0.075	0.173
	0.086	0.058	0.058	0.056		0.133	0.038	0.039	0.112
	0.028	0.088	0.088	0.213		0.123	0.057	0.034	0.168
	0.065	0.125	0.125	0.047		0.087	0.064	0.085	0.117
	0.12	0.077	0.077	0.077		0.098	0.139	0.12	0.206
	0.073	0.041	0.041	0.079		0.049	0.028	0.048	0.158
	0.111	0.059	0.059	0.106		0.052	0.025	0.05	0.257
	0.201	0.044	0.044	0.078		0.179	0.067	0.038	0.163
	0.088	0.091	0.091	0.053		0.054	0.029	0.084	0.192
	0.032	0.086	0.086	0.038		0.089	0.066	0.075	0.238
	0.022	0.071	0.071	0.041		0.021	0.16	0.151	0.342
	0.054	0.105	0.105	0.022		0.114	0.174	0.033	0.057
	0.073	0.021	0.021	0.09		0.111	0.039	0.145	0.032
	0.163	0.062	0.062	0.108		0.113	0.023	0.052	0.18
	0.206	0.069	0.069	0.076		0.145	0.057	0.154	0.211
	0.091	0.083	0.083	0.034		0.127	0.103	0.071	0.14
	0.035	0.068	0.068	0.092		0.123	0.308	0.065	0.27
	0.025	0.151	0.151	0.124		0.103	0.027	0.088	0.161
	0.163	0.044	0.044	0.023		0.053	0.054	0.042	0.054
	0.059	0.154	0.154	0.094		0.089	0.199	0.095	0.235
	0.038	0.066	0.066	0.044		0.057	0.171	0.051	0.187
	0.051	0.087	0.087	0.075		0.087	0.134	0.074	0.05
	0.054	0.225	0.225	0.029		0.186	0.144	0.196	0.209
	0.059	0.048	0.048	0.116		0.063	0.073	0.084	0.11
	0.239	0.113	0.113	0.086		0.132	0.264	0.104	0.03
	0.051	0.071	0.071	0.118		0.043	0.156	0.059	0.15
	0.077	0.13	0.13	0.079		0.477	0.223	0.136	0.101
	0.11	0.056	0.056	0.024		0.106	0.047	0.047	0.078
	0.06	0.17	0.17	0.039		0.171	0.022	0.211	0.166
	0.069	0.033	0.033	0.032		0.025	0.132	0.083	0.026
	0.085	0.164	0.164	0.102		0.034	0.229	0.101	0.241
	0.233	0.119	0.119	0.096		0.12	0.086	0.095	0.034
	0.084	0.024	0.024	0.115		0.048	0.518	0.061	0.088
	0.05	0.043	0.043	0.07		0.056	0.249	0.109	0.199
	0.154	0.026	0.026	0.128		0.025	0.062	0.041	0.024
	0.049	0.479	0.479	0.074		0.034	0.021	0.035	0.186
	0.184	0.124	0.124	0.158		0.1	0.072	0.051	0.154
	0.05	0.068	0.068	0.048		0.339	0.187	0.04	0.133
	0.079	0.091	0.091	0.039		0.06	0.148	0.048	0.213
	0.243	0.187	0.187	0.17		0.194	0.196	0.13	0.151
	0.053	0.058	0.058	0.051		0.073	0.044	0.097	0.209
	0.169	0.052	0.052	0.059		0.115	0.054	0.043	0.316
	0.031	0.031	0.031	0.071		0.387	0.146	0.115	0.087
	0.057	0.036	0.036	0.107		0.079	0.025	0.054	0.131
	0.048	0.232	0.232	0.134		0.03	0.163	0.022	0.154
	0.083	0.137	0.137	0.115		0.238	0.207	0.031	0.148
	0.046	0.076	0.076	0.12		0.077	0.115	0.062	0.372
	0.129	0.026	0.026	0.105		0.056	0.129	0.104	0.189
	0.041	0.156	0.156	0.038		0.11	0.174	0.041	0.079
	0.094	0.05	0.05	0.092		0.055	0.025	0.028	0.394
	0.111	0.11	0.11	0.03		0.438	0.041	0.045	0.028
	0.301	0.028	0.028	0.048		0.057	0.108	0.132	0.202
	0.081	0.606	0.606	0.057		0.11	0.168	0.024	0.228
	0.024	0.079	0.079	0.036		0.155	0.102	0.095	0.238
	0.02	0.095	0.095	0.03		0.223	0.079	0.057	0.189
	0.101	0.045	0.045	0.125		0.241	0.062	0.16	0.194
	0.113	0.062	0.062	0.054		0.083	0.094	0.098	0.207
	0.057	0.043	0.043	0.03		0.057	0.122	0.056	0.216
	0.039	0.078	0.078	0.048		0.075	0.073	0.069	0.175
	0.129	0.04	0.04	0.148		0.198	0.197	0.061	0.292
	0.061	0.147	0.147	0.116		0.352	0.081	0.069	0.114
	0.058	0.064	0.064	0.082		0.028	0.054	0.114	0.156
	0.151	0.042	0.042	0.166		0.033	0.02	0.08	0.034
	0.08	0.094	0.094	0.122		0.107	0.161	0.201	0.178
	0.19	0.026	0.026	0.285		0.164	0.05	0.024	0.187
	0.022	0.09	0.09	0.056		0.069	0.217	0.047	0.146
	0.021	0.085	0.085	0.022		0.13	0.07	0.12	0.366
	0.092	0.196	0.196	0.217		0.057	0.148	0.157	0.11
	0.046	0.039	0.039	0.092		0.029	0.023	0.053	0.096
	0.125	0.048	0.048	0.055		0.103	0.153	0.079	0.206
	0.121	0.301	0.301	0.039		0.05	0.124	0.083	0.063
	0.027	0.1	0.1	0.064		0.065	0.472	0.046	0.073
	0.044	0.111	0.111	0.021		0.174	0.158	0.1	0.293
	0.04	0.024	0.024	0.07		0.021	0.098	0.147	0.045
	0.028	0.022	0.022	0.039		0.085	0.219	0.136	0.032
	0.058	0.113	0.113	0.121		0.154	0.05	0.068	0.103
	0.077	0.12	0.12	0.2		0.095	0.127	0.04	0.222
	0.102	0.042	0.042	0.08		0.185	0.046	0.034	0.087
	0.111	0.131	0.131	0.027		0.117	0.035	0.179	0.508
	0.034	0.095	0.095	0.118		0.246	0.156	0.035	0.324
	0.027	0.089	0.089	0.155		0.025	0.158	0.131	0.02
	0.19	0.061	0.061	0.103		0.336	0.092	0.053	0.1
	0.097	0.057	0.057	0.154		0.041	0.025	0.108	0.418
	0.091	0.083	0.083	0.029		0.17	0.113	0.11	0.588
	0.095	0.038	0.038	0.043		0.062	0.256	0.104	0.044
	0.067	0.033	0.033	0.102		0.094	0.025	0.079	0.149
	0.136	0.467	0.467	0.142		0.195	0.046	0.073	0.085
	0.06	0.133	0.133	0.077		0.129	0.146	0.087	0.146
	0.02	0.095	0.095	0.087		0.109	0.137	0.078	0.193
	0.025	0.107	0.107	0.044		0.172	0.199	0.216	0.069
	0.063	0.102	0.102	0.043		0.076	0.069	0.167	0.195
	0.105	0.156	0.156	0.046		0.101	0.179	0.07	0.056
	0.072	0.057	0.057	0.083		0.095	0.086	0.208	0.117
	0.109	0.125	0.125	0.055		0.062	0.122	0.02	0.17
	0.051	0.024	0.024	0.074		0.052	0.033	0.043	0.171
	0.096	0.123	0.123	0.089		0.12	0.127	0.29	0.183
	0.074	0.076	0.076	0.133		0.183	0.139	0.072	0.145
	0.028	0.076	0.076	0.063		0.11	0.02	0.07	0.234
	0.103	0.039	0.039	0.061		0.15	0.194	0.053	0.086
	0.058	0.128	0.128	0.055		0.31	0.176	0.067	0.049
	0.118	0.026	0.026	0.185		0.104	0.085	0.076	0.209
	0.066	0.102	0.102	0.058		0.144	0.047	0.037	0.03
	0.143	0.106	0.106	0.02		0.079	0.13	0.096	0.047
	0.08	0.101	0.101	0.055		0.022	0.049	0.039	0.118
	0.105	0.041	0.041	0.084		0.067	0.147	0.074	0.244
	0.038	0.187	0.187	0.05		0.139	0.044	0.132	0.049
	0.031	0.034	0.034	0.063		0.192	0.17	0.159	0.09
	0.059	0.096	0.096	0.11		0.203	0.031	0.07	0.097
	0.05	0.14	0.14	0.077		0.132	0.106	0.05	0.192
	0.034	0.069	0.069	0.113		0.102	0.032	0.089	0.188
	0.057	0.031	0.031	0.124		0.024	0.122	0.101	0.121
	0.047	0.088	0.088	0.122		0.03	0.193	0.047	0.148
	0.025	0.027	0.027	0.234		0.201	0.179	0.057	0.132
	0.057	0.028	0.028	0.064		0.049	0.199	0.022	0.073
	0.021	0.025	0.025	0.046		0.042	0.133	0.052	0.237
	0.073	0.064	0.064	0.17		0.188	0.107	0.097	0.023
	0.023	0.097	0.097	0.15		0.212	0.058	0.042	0.197
	0.073	0.074	0.074	0.041		0.261	0.079	0.093	0.046
	0.048	0.061	0.061	0.12		0.037	0.087	0.021	0.022
	0.062	0.096	0.096	0.044		0.169	0.344	0.05	0.188
	0.143	0.158	0.158	0.025		0.093	0.26	0.021	0.065
	0.098	0.064	0.064	0.1		0.474	0.04	0.041	0.164
	0.116	0.052	0.052	0.086		0.109	0.194	0.146	0.286
	0.062	0.027	0.027	0.099		0.14	0.127	0.041	0.1
	0.028	0.054	0.054	0.131		0.279	0.021	0.132	0.083
	0.027	0.025	0.025	0.023		0.186	0.177	0.038	0.18
	0.114	0.062	0.062	0.11		0.036	0.152	0.034	0.099
	0.084	0.096	0.096	0.093		0.043	0.027	0.107	0.263
	0.066	0.027	0.027	0.135		0.101	0.073	0.061	0.162
	0.026	0.112	0.112	0.136		0.148	0.138	0.064	0.11
	0.024	0.051	0.051	0.026		0.407	0.105	0.061	0.1
	0.036	0.131	0.131	0.033		0.122	0.036	0.022	0.538
	0.024	0.028	0.028	0.095		0.222	0.156	0.062	0.366
	0.16	0.023	0.023	0.065		0.093	0.245	0.063	0.087
	0.091	0.067	0.067	0.211		0.238	0.302	0.041	0.071
	0.027	0.038	0.038	0.123		0.03	0.089	0.105	0.092
	0.113	0.054	0.054	0.143		0.207	0.025	0.112	0.16
	0.085	0.176	0.176	0.079		0.325	0.078	0.148	0.211
	0.029	0.06	0.06	0.214		0.086	0.054	0.053	0.342
	0.022	0.058	0.058	0.157		0.17	0.141	0.04	0.18
	0.021	0.05	0.05	0.082		0.142	0.083	0.03	0.216
	0.145	0.062	0.062	0.102		0.119	0.071	0.061	0.032
	0.056	0.047	0.047	0.066		0.091	0.149	0.047	0.12
	0.113	0.096	0.096	0.101		0.041	0.022	0.026	0.135
	0.055	0.047	0.047	0.029		0.159	0.022	0.071	0.023
	0.147	0.05	0.05	0.056		0.04	0.154	0.06	0.208
	0.073	0.021	0.021	0.066		0.347	0.024	0.154	0.224
	0.138	0.034	0.034	0.022		0.12	0.022	0.05	0.092
	0.079	0.117	0.117	0.068		0.2	0.163	0.08	0.02
	0.038	0.061	0.061	0.04		0.157	0.119	0.038	0.172
	0.041	0.03	0.03	0.062		0.183	0.048	0.081	0.044
	0.188	0.134	0.134	0.05		0.132	0.245	0.093	0.26
	0.368	0.069	0.069	0.104		0.294	0.045	0.061	0.138
	0.046	0.04	0.04	0.035		0.174	0.132	0.039	0.041
	0.074	0.074	0.074	0.098		0.039	0.09	0.072	0.231
	0.143	0.119	0.119	0.096		0.043	0.076	0.127	0.211
	0.144	0.214	0.214	0.04		0.218	0.057	0.051	0.175
	0.024	0.062	0.062	0.193		0.051	0.077	0.031	0.084
	0.156	0.058	0.058	0.025		0.067	0.021	0.199	0.267
	0.106	0.564	0.564	0.065		0.034	0.089	0.079	0.224
	0.058	0.023	0.023	0.046		0.05	0.162	0.115	0.021
	0.079	0.046	0.046	0.116		0.125	0.142	0.068	0.204
	0.158	0.102	0.102	0.059		0.056	0.054	0.038	0.083
	0.075	0.07	0.07	0.098		0.064	0.114	0.191	0.057
	0.061	0.062	0.062	0.027		0.201	0.199	0.118	0.03
	0.058	0.045	0.045	0.072		0.216	0.074	0.12	0.066
	0.168	0.079	0.079	0.085		0.045	0.205	0.047	0.168
	0.076	0.079	0.079	0.064		0.088	0.067	0.034	0.199
	0.053	0.076	0.076	0.102		0.149	0.157	0.108	0.118
	0.111	0.028	0.028	0.063		0.047	0.261	0.304	0.183
	0.048	0.057	0.057	0.052		0.261	0.135	0.102	0.166
	0.183	0.031	0.031	0.253		0.231	0.098	0.034	0.181
	0.028	0.028	0.028	0.115		0.036	0.153	0.09	0.039
	0.053	0.023	0.023	0.078		0.109	0.193	0.044	0.026
	0.063	0.107	0.107	0.037		0.032	0.231	0.101	0.21
	0.065	0.077	0.077	0.113		0.138	0.232	0.085	0.201
	0.047	0.068	0.068	0.021		0.177	0.105	0.125	0.177
	0.113	0.099	0.099	0.083		0.021	0.068	0.067	0.053
	0.066	0.05	0.05	0.026		0.081	0.18	0.104	0.077
	0.021	0.123	0.123	0.238		0.048	0.033	0.159	0.052
	0.02	0.047	0.047	0.05		0.292	0.071	0.074	0.12
	0.089	0.068	0.068	0.085		0.102	0.366	0.031	0.111
	0.115	0.108	0.108	0.107		0.202	0.093	0.172	0.122
	0.095	0.054	0.054	0.061		0.02	0.182	0.085	0.187
	0.055	0.027	0.027	0.02		0.042	0.066	0.032	0.162
	0.126	0.026	0.026	0.046		0.074	0.097	0.238	0.151
	0.052	0.093	0.093	0.039		0.02	0.026	0.117	0.1
	0.072	0.135	0.135	0.076		0.028	0.258	0.062	0.22
	0.162	0.05	0.05	0.095		0.102	0.222	0.032	0.05
	0.125	0.114	0.114	0.185		0.133	0.149	0.026	0.183
	0.088	0.03	0.03	0.063		0.08	0.063	0.071	0.083
	0.192	0.054	0.054	0.038		0.193	0.06	0.041	0.127
	0.1	0.029	0.029	0.092		0.169	0.037	0.022	0.079
	0.072	0.024	0.024	0.05		0.068	0.144	0.101	0.172
	0.021	0.08	0.08	0.089		0.105	0.028	0.062	0.054
	0.106	0.098	0.098	0.056		0.103	0.139	0.052	0.379
	0.061	0.031	0.031	0.068		0.143	0.057	0.099	0.087
	0.057	0.08	0.08	0.135		0.048	0.026	0.102	0.21
	0.059	0.028	0.028	0.163		0.326	0.061	0.05	0.249
	0.066	0.076	0.076	0.102		0.143	0.193	0.054	0.127
	0.029	0.125	0.125	0.144		0.128	0.085	0.047	0.126
	0.151	0.026	0.026	0.128		0.155	0.262	0.083	0.122
	0.036	0.023	0.023	0.145		0.201	0.207	0.049	0.161
	0.025	0.062	0.062	0.102		0.17	0.325	0.22	0.062
	0.038	0.056	0.056	0.046		0.093	0.065	0.036	0.195
	0.026	0.032	0.032	0.099		0.072	0.135	0.106	0.095
	0.131	0.021	0.021	0.127		0.049	0.033	0.102	0.027
	0.11	0.078	0.078	0.048		0.111	0.102	0.16	0.048
	0.033	0.022	0.022	0.041		0.159	0.236	0.063	0.154
	0.049	0.039	0.039	0.072		0.408	0.121	0.035	0.043
	0.275	0.104	0.104	0.04		0.294	0.089	0.024	0.196
	0.044	0.151	0.151	0.116		0.145	0.023	0.057	0.173
	0.075	0.049	0.049	0.068		0.138	0.073	0.097	0.047
	0.034	0.219	0.219	0.032		0.259	0.173	0.034	0.329
	0.205	0.03	0.03	0.068		0.125	0.131	0.032	0.089
	0.198	0.049	0.049	0.069		0.036	0.076	0.115	0.172
	0.228	0.02	0.02	0.167		0.206	0.107	0.08	0.06
	0.069	0.021	0.021	0.098		0.169	0.035	0.077	0.026
	0.07	0.25	0.25	0.166		0.047	0.035	0.091	0.107
	0.037	0.028	0.028	0.077		0.133	0.15	0.079	0.144
	0.053	0.18	0.18	0.059		0.043	0.054	0.084	0.244
	0.143	0.093	0.093	0.09		0.088	0.072	0.034	0.047
	0.043	0.028	0.028	0.063		0.143	0.039	0.116	0.075
	0.114	0.098	0.098	0.079		0.091	0.205	0.046	0.049
	0.139	0.079	0.079	0.042		0.054	0.02	0.083	0.216
	0.021	0.217	0.217	0.09		0.307	0.053	0.022	0.161
	0.056	0.257	0.257	0.191		0.108	0.114	0.072	0.142
	0.131	0.049	0.049	0.104		0.083	0.076	0.034	0.15
	0.035	0.037	0.037	0.113		0.118	0.266	0.134	0.156
	0.075	0.289	0.289	0.088		0.124	0.066	0.027	0.082
	0.078	0.098	0.098	0.151		0.039	0.156	0.057	0.029
	0.157	0.036	0.036	0.056		0.344	0.022	0.134	0.168
	0.079	0.101	0.101	0.1		0.199	0.02	0.09	0.042
	0.079	0.043	0.043	0.109		0.062	0.079	0.024	0.284
	0.077	0.215	0.215	0.175		0.13	0.03	0.03	0.155
	0.08	0.072	0.072	0.093		0.038	0.083	0.176	0.173
	0.079	0.241	0.241	0.045		0.236	0.037	0.086	0.225
	0.129	0.128	0.128	0.042		0.16	0.025	0.095	0.158
	0.059	0.027	0.027	0.14		0.132	0.08	0.057	0.102
	0.049	0.101	0.101	0.034		0.294	0.088	0.404	0.15
	0.054	0.036	0.036	0.072		0.02	0.193	0.03	0.023
	0.053	0.122	0.122	0.02		0.097	0.151	0.05	0.13
	0.056	0.034	0.034	0.106		0.209	0.247	0.079	0.039
	0.271	0.259	0.259	0.049		0.06	0.069	0.162	0.174
	0.05	0.024	0.024	0.163		0.048	0.055	0.115	0.263
	0.116	0.026	0.026	0.129		0.179	0.086	0.02	0.169
	0.1	0.068	0.068	0.116		0.034	0.101	0.079	0.21
	0.235	0.132	0.132	0.023		0.09	0.152	0.121	0.031
	0.041	0.169	0.169	0.036		0.036	0.125	0.118	0.042
	0.075	0.226	0.226	0.127		0.167	0.041	0.023	0.148
	0.182	0.157	0.157	0.02		0.18	0.119	0.14	0.216
	0.082	0.108	0.108	0.079		0.047	0.191	0.089	0.135
	0.062	0.126	0.126	0.034		0.119	0.049	0.046	0.152
	0.098	0.062	0.062	0.056		0.082	0.103	0.033	0.208
	0.057	0.11	0.11	0.067		0.084	0.085	0.062	0.158
	0.02	0.068	0.068	0.036		0.224	0.077	0.046	0.102
	0.14	0.044	0.044	0.06		0.088	0.067	0.177	0.238
	0.091	0.027	0.027	0.121		0.156	0.029	0.074	0.06
	0.125	0.193	0.193	1.031		0.163	0.058	0.108	0.084
	0.2	0.056	0.056	0.056		0.131	0.213	0.044	0.402
	0.035	0.076	0.076	0.022		0.209	0.163	0.063	0.05
	0.146	0.029	0.029	0.023		0.11	0.106	0.03	0.06
	0.026	0.038	0.038	0.086		0.249	0.093	0.036	0.032
	0.183	0.147	0.147	0.032		0.146	0.111	0.035	0.216
	0.08	0.077	0.077	0.074		0.103	0.095	0.071	0.344
	0.056	0.025	0.025	0.074		0.079	0.113	0.125	0.102
	0.121	0.152	0.152	0.101		0.078	0.227	0.135	0.024
	0.034	0.026	0.026	0.022		0.264	0.074	0.127	0.198
	0.302	0.098	0.098	0.059		0.198	0.144	0.133	0.276
	0.084	0.059	0.059	0.082		0.211	0.117	0.026	0.116
	0.082	0.05	0.05	0.034		0.198	0.19	0.025	0.065
	0.132	0.028	0.028	0.068		0.17	0.034	0.084	0.434
	0.106	0.033	0.033	0.057		0.125	0.038	0.115	0.067
	0.137	0.08	0.08	0.063		0.125	0.038	0.08	0.229
	0.022	0.209	0.209	0.126		0.115	0.025	0.171	0.175
	0.03	0.026	0.026	0.037		0.121	0.073	0.155	0.27
	0.045	0.028	0.028	0.072		0.051	0.04	0.116	0.172
	0.02	0.065	0.065	0.038		0.247	0.099	0.033	0.238
	0.079	0.27	0.27	0.06		0.051	0.174	0.028	0.259
	0.188	0.033	0.033	0.085		0.034	0.038	0.066	0.198
	0.084	0.058	0.058	0.088		0.088	0.131	0.062	0.094
	0.034	0.146	0.146	0.204		0.363	0.135	0.02	0.159
	0.066	0.05	0.05	0.034		0.083	0.308	0.087	0.02
	0.184	0.063	0.063	0.087		0.161	0.028	0.027	0.051
	0.099	0.064	0.064	0.066		0.414	0.082	0.107	0.216
	0.041	0.034	0.034	0.142		0.137	0.043	0.034	0.069
	0.107	0.144	0.144	0.193		0.193	0.117	0.139	0.047
	0.113	0.064	0.064	0.099		0.337	0.023	0.02	0.083
	0.048	0.036	0.036	0.068		0.041	0.102	0.06	0.232
	0.174	0.059	0.059	0.094		0.067	0.407	0.032	0.302
	0.109	0.336	0.336	0.071		0.062	0.205	0.066	0.17
	0.028	0.054	0.054	0.181		0.196	0.235	0.024	0.167
	0.188	0.115	0.115	0.17		0.056	0.225	0.086	0.036
	0.11	0.04	0.04	0.122		0.045	0.043	0.039	0.155
	0.065	0.054	0.054	0.069		0.105	0.077	0.081	0.29
	0.101	0.047	0.047	0.132		0.071	0.022	0.087	0.181
	0.022	0.15	0.15	0.135		0.209	0.022	0.04	0.062
	0.033	0.03	0.03	0.064		0.148	0.141	0.061	0.375
	0.144	0.033	0.033	0.079		0.053	0.184	0.079	0.134
	0.06	0.044	0.044	0.136		0.065	0.114	0.034	0.039
	0.107	0.077	0.077	0.04		0.121	0.02	0.063	0.303
	0.069	0.047	0.047	0.17		0.102	0.048	0.033	0.086
	0.11	0.029	0.029	0.149		0.448	0.093	0.115	0.117
	0.07	0.044	0.044	0.025		0.153	0.035	0.095	0.078
	0.053	0.025	0.025	0.023		0.285	0.032	0.048	0.224
	0.094	0.155	0.155	0.042		0.067	0.145	0.03	0.204
	0.142	0.043	0.043	0.094		0.118	0.077	0.037	0.195
	0.06	0.036	0.036	0.057		0.303	0.125	0.048	0.231
	0.485	0.024	0.024	0.021		0.183	0.133	0.054	0.177
	0.076	0.035	0.035	0.078		0.157	0.183	0.022	0.293
	0.037	0.069	0.069	0.032		0.085	0.047	0.212	0.133
	0.272	0.023	0.023	0.025		0.157	0.096	0.147	0.063
	0.138	0.025	0.025	0.026		0.024	0.234	0.057	0.35
	0.06	0.034	0.034	0.113		0.141	0.051	0.054	0.182
	0.039	0.075	0.075	0.071		0.075	0.054	0.096	0.091
	0.07	0.04	0.04	0.043		0.315	0.047	0.116	0.141
	0.282	0.158	0.158	0.032		0.127	0.193	0.048	0.162
	0.073	0.026	0.026	0.059		0.253	0.156	0.086	0.242
	0.14	0.043	0.043	0.145		0.166	0.09	0.09	0.236
	0.088	0.047	0.047	0.044		0.065	0.148	0.035	0.034
	0.045	0.059	0.059	0.079		0.059	0.075	0.085	0.023
	0.146	0.159	0.159	0.074		0.228	0.04	0.031	0.159
	0.074	0.133	0.133	0.229		0.05	0.048	0.024	0.034
	0.063	0.074	0.074	0.127		0.02	0.124	0.025	0.048
	0.062	0.095	0.095	0.102		0.034	0.047	0.027	0.184
	0.021	0.054	0.054	0.109		0.171	0.099	0.084	0.283
	0.053	0.046	0.046	0.083		0.036	0.115	0.083	0.157
	0.139	0.066	0.066	0.03		0.233	0.092	0.08	0.1
	0.09	0.111	0.111	0.163		0.045	0.055	0.111	0.227
	0.09	0.078	0.078	0.051		0.039	0.051	0.042	0.145
	0.181	0.087	0.087	0.133		0.07	0.208	0.063	0.059
	0.108	0.021	0.021	0.128		0.148	0.026	0.079	0.113
	0.085	0.09	0.09	0.162		0.025	0.161	0.043	0.067
	0.181	0.037	0.037	0.021		0.511	0.127	0.124	0.196
	0.055	0.083	0.083	0.058		0.529	0.31	0.04	0.101
	0.086	0.038	0.038	0.07		0.319	0.024	0.047	0.099
	0.026	0.075	0.075	0.036		0.022	0.083	0.142	0.254
	0.086	0.099	0.099	0.237		0.162	0.042	0.102	0.193
	0.048	0.143	0.143	0.056		0.134	0.064	0.058	0.178
	0.105	0.108	0.108	0.099		0.06	0.241	0.049	0.042
	0.124	0.112	0.112	0.071		0.266	0.224	0.095	0.209
	0.143	0.058	0.058	0.121		0.02	0.068	0.046	0.157
	0.105	0.082	0.082	0.052		0.244	0.097	0.028	0.145
	0.086	0.057	0.057	0.022		0.15	0.133	0.125	0.149
	0.034	0.048	0.048	0.07		0.057	0.3	0.031	0.174
	0.056	0.063	0.063	0.052		0.094	0.102	0.059	0.151
	0.045	0.073	0.073	0.041		0.265	0.021	0.12	0.251
	0.116	0.035	0.035	0.123		0.168	0.067	0.068	0.124
	0.034	0.05	0.05	0.037		0.1	0.15	0.135	0.193
	0.116	0.041	0.041	0.061		0.054	0.036	0.057	0.162
	0.123	0.027	0.027	0.062		0.66	0.057	0.059	0.04
	0.041	0.041	0.041	0.044		0.295	0.114	0.031	0.212
	0.264	0.07	0.07	0.038		0.123	0.079	0.193	0.157
	0.185	0.087	0.087	0.069		0.142	0.125	0.1	0.122
	0.025	0.032	0.032	0.104		0.136	0.252	0.417	0.122
	0.046	0.051	0.051	0.071		0.085	0.122	0.132	0.115
	0.055	0.055	0.055	0.066		0.074	0.048	0.101	0.15
	0.135	0.038	0.038	0.022		0.035	0.05	0.101	0.127
	0.152	0.056	0.056	0.097		0.195	0.196	0.1	0.208
	0.025	0.082	0.082	0.122		0.179	0.29	0.042	0.264
	0.114	0.05	0.05	0.143		0.311	0.187	0.024	0.151
	0.1	0.057	0.057	0.089		0.065	0.266	0.051	0.086
	0.023	0.025	0.025	0.131		0.134	0.146	0.037	0.232
	0.098	0.045	0.045	0.149		0.022	0.324	0.118	0.142
	0.089	0.095	0.095	0.041		0.023	0.101	0.121	0.198
	0.074	0.054	0.054	0.058		0.153	0.142	0.045	0.284
	0.129	0.093	0.093	0.047		0.339	0.205	0.07	0.032
	0.036	0.02	0.02	0.039		0.179	0.09	0.058	0.277
	0.247	0.024	0.024	0.083		0.401	0.137	0.051	0.367
	0.036	0.106	0.106	0.07		0.221	0.039	0.034	0.106
	0.031	0.098	0.098	0.042		0.078	0.101	0.164	0.924
	0.038	0.074	0.074	0.099		0.214	0.27	0.043	0.05
	0.107	0.067	0.067	0.02		0.197	0.119	0.093	0.164
	0.025	0.031	0.031	0.116		0.354	0.125	0.032	0.114
	0.044	0.042	0.042	0.022		0.372	0.152	0.134	0.116
	0.036	0.056	0.056	0.118		0.235	0.153	0.05	0.111
	0.069	0.044	0.044	0.042		0.121	0.042	0.089	0.108
	0.075	0.025	0.025	0.061		0.133	0.087	0.03	0.352
	0.057	0.081	0.081	0.057		0.134	0.09	0.059	0.172
	0.047	0.09	0.09	0.044		0.106	0.026	0.032	0.184
	0.056	0.045	0.045	0.23		0.105	0.058	0.077	0.102
	0.136	0.076	0.076	0.021		0.222	0.252	0.057	0.252
	0.02	0.052	0.052	0.034		0.219	0.204	0.065	0.244
	0.06	0.057	0.057	0.092		0.034	0.232	0.089	0.158
	0.072	0.061	0.061	0.129		0.058	0.217	0.059	0.218
	0.083	0.059	0.059	0.048		0.027	0.133	0.027	0.131
	0.074	0.038	0.038	0.101		0.02	0.079	0.047	0.05
	0.038	0.078	0.078	0.148		0.062	0.056	0.1	0.461
	0.113	0.039	0.039	0.123		0.167	0.216	0.033	0.248
	0.07	0.123	0.123	0.111		0.055	0.033	0.062	0.029
	0.181	0.041	0.041	0.032		0.139	0.046	0.112	0.186
	0.032	0.069	0.069	0.022		0.025	0.136	0.067	0.091
	0.031	0.084	0.084	0.067		0.284	0.073	0.077	0.135
	0.151	0.064	0.064	0.032		0.133	0.251	0.041	0.021
	0.267	0.108	0.108	0.129		0.044	0.128	0.042	0.257
	0.1	0.021	0.021	0.031		0.136	0.153	0.086	0.186
	0.057	0.101	0.101	0.117		0.128	0.171	0.042	0.217
	0.128	0.102	0.102	0.049		0.194	0.041	0.047	0.3
	0.089	0.128	0.128	0.025		0.065	0.027	0.102	0.034
	0.053	0.111	0.111	0.056		0.232	0.07	0.084	0.225
	0.051	0.127	0.127	0.076		0.195	0.198	0.087	0.132
	0.04	0.089	0.089	0.096		0.033	0.04	0.065	0.14
	0.071	0.075	0.075	0.071		0.024	0.064	0.049	0.14
	0.041	0.028	0.028	0.174		0.221	0.133	0.026	0.217
	0.024	0.034	0.034	0.072		0.225	0.102	0.074	0.133
	0.126	0.068	0.068	0.095		0.161	0.426	0.07	0.05
	0.046	0.024	0.024	0.076		0.187	0.298	0.045	0.251
	0.079	0.197	0.197	0.02		0.216	0.154	0.037	0.202
	0.128	0.044	0.044	0.035		0.221	0.151	0.225	0.123
	0.198	0.026	0.026	0.068		0.021	0.178	0.035	0.049
	0.265	0.031	0.031	0.089		0.144	0.029	0.057	0.153
	0.079	0.027	0.027	0.106		0.142	0.043	0.095	0.06
	0.035	0.068	0.068	0.125		0.033	0.039	0.056	0.214
	0.071	0.066	0.066	0.094		0.171	0.147	0.056	0.026
	0.059	0.115	0.115	0.024		0.259	0.082	0.05	0.097
	0.028	0.101	0.101	0.105		0.089	0.074	0.037	0.096
	0.102	0.072	0.072	0.058		0.169	0.052	0.117	0.172
	0.129	0.049	0.049	0.103		0.159	0.042	0.077	0.187
	0.046	0.049	0.049	0.072		0.206	0.021	0.218	0.046
	0.054	0.059	0.059	0.116		0.051	0.252	0.066	0.162
	0.048	0.079	0.079	0.073		0.022	0.115	0.067	0.02
	0.102	0.127	0.127	0.029		0.092	0.201	0.04	0.052
	0.145	0.068	0.068	0.028		0.088	0.036	0.027	0.216
	0.068	0.024	0.024	0.066		0.085	0.086	0.089	0.302
	0.083	0.104	0.104	0.047		0.113	0.101	0.084	0.2
	0.104	0.104	0.104	0.099		0.037	0.172	0.074	0.217
	0.064	0.098	0.098	0.067		0.054	0.269	0.087	0.097
	0.092	0.081	0.081	0.035		0.065	0.127	0.06	0.088
	0.057	0.033	0.033	0.156		0.047	0.146	0.062	0.053
	0.047	0.049	0.049	0.054		0.143	0.02	0.112	0.22
	0.071	0.067	0.067	0.126		0.14	0.098	0.091	0.138
	0.028	0.021	0.021	0.067		0.031	0.051	0.077	0.425
	0.035	0.116	0.116	0.067		0.053	0.046	0.04	0.118
	0.052	0.02	0.02	0.063		0.172	0.34	0.065	0.235
	0.045	0.093	0.093	0.05		0.025	0.148	0.023	0.151
	0.022	0.077	0.077	0.094		0.091	0.039	0.048	0.243
	0.037	0.024	0.024	0.038		0.026	0.038	0.211	0.096
	0.035	0.1	0.1	0.064		0.07	0.029	0.073	0.216
	0.046	0.054	0.054	0.106		0.132	0.035	0.063	0.34
	0.057	0.049	0.049	0.117		0.246	0.067	0.104	0.112
	0.078	0.044	0.044	0.107		0.15	0.092	0.102	0.187
	0.024	0.065	0.065	0.067		0.119	0.034	0.039	0.152
	0.076	0.039	0.039	0.064		0.19	0.086	0.048	0.041
	0.144	0.044	0.044	0.134		0.053	0.151	0.106	0.079
	0.08	0.046	0.046	0.089		0.03	0.066	0.114	0.134
	0.052	0.046	0.046	0.193		0.117	0.032	0.093	0.177
	0.099	0.037	0.037	0.088		0.049	0.072	0.038	0.024
	0.119	0.09	0.09	0.116		0.026	0.126	0.05	0.051
	0.12	0.029	0.029	0.058		0.06	0.039	0.049	0.143
	0.066	0.053	0.053	0.045		0.048	0.192	0.189	0.024
	0.094	0.062	0.062	0.064		0.079	0.081	0.104	0.04
	0.022	0.028	0.028	0.082		0.032	0.164	0.043	0.171
	0.033	0.062	0.062	0.064		0.126	0.15	0.206	0.148
	0.059	0.086	0.086	0.095		0.035	0.19	0.049	0.066
	0.041	0.039	0.039	0.079		0.162	0.15	0.034	0.176
	0.295	0.231	0.231	0.044		0.105	0.09	0.102	0.053
	0.024	0.033	0.033	0.062		0.029	0.135	0.113	0.202
	0.035	0.059	0.059	0.083		0.082	0.126	0.125	0.262
	0.112	0.029	0.029	0.034		0.073	0.105	0.037	0.104
	0.062	0.033	0.033	0.165		0.032	0.124	0.051	0.162
	0.034	0.084	0.084	0.052		0.052	0.142	0.046	0.197
	0.036	0.033	0.033	0.103		0.07	0.214	0.034	0.116
	0.075	0.083	0.083	0.051		0.058	0.102	0.139	0.124
	0.021	0.173	0.173	0.066		0.197	0.127	0.068	0.092
	0.048	0.023	0.023	0.029		0.033	0.053	0.034	0.19
	0.036	0.076	0.076	0.125		0.131	0.156	0.078	0.076
	0.026	0.035	0.035	0.107		0.107	0.02	0.07	0.051
	0.072	0.021	0.021	0.084		0.028	0.021	0.148	0.066
	0.077	0.056	0.056	0.05		0.085	0.084	0.125	0.157
	0.097	0.058	0.058	0.091		0.025	0.021	0.029	0.152
	0.189	0.021	0.021	0.046		0.028	0.099	0.034	0.17
	0.074	0.07	0.07	0.081		0.07	0.199	0.141	0.262
	0.115	0.03	0.03	0.06		0.145	0.208	0.071	0.1
	0.059	0.064	0.064	0.156		0.074	0.093	0.054	0.159
	0.057	0.048	0.048	0.035		0.136	0.228	0.023	0.054
	0.088	0.036	0.036	0.102		0.151	0.023	0.057	0.051
	0.03	0.08	0.08	0.064		0.076	0.034	0.085	0.192
	0.092	0.022	0.022	0.02		0.122	0.068	0.089	0.058
	0.151	0.04	0.04	0.034		0.324	0.085	0.208	0.158
	0.037	0.06	0.06	0.083		0.212	0.107	0.065	0.032
	0.029	0.071	0.071	0.125		0.038	0.04	0.088	0.122
	0.085	0.039	0.039	0.055		0.2	0.107	0.049	0.338
	0.042	0.116	0.116	0.171		0.164	0.034	0.137	0.065
	0.101	0.09	0.09	0.064		0.105	0.027	0.087	0.214
	0.063	0.042	0.042	0.126		0.084	0.233	0.036	0.234
	0.04	0.047	0.047	0.075		0.094	0.021	0.085	0.186
	0.025	0.065	0.065	0.111		0.131	0.064	0.082	0.178
	0.03	0.04	0.04	0.096		0.074	0.041	0.041	0.14
	0.056	0.136	0.136	0.139		0.189	0.146	0.029	0.05
	0.06	0.036	0.036	0.074		0.292	0.06	0.216	0.034
	0.222	0.021	0.021	0.025		0.135	0.025	0.027	0.12
	0.058	0.024	0.024	0.031		0.167	0.154	0.091	0.054
	0.044	0.1	0.1	0.058		0.124	0.101	0.06	0.043
	0.231	0.035	0.035	0.046		0.026	0.045	0.106	0.058
	0.05	0.046	0.046	0.06		0.122	0.125	0.035	0.342
	0.158	0.082	0.082	0.113		0.08	0.082	0.028	0.182
	0.078	0.025	0.025	0.058		0.07	0.306	0.119	0.393
	0.046	0.046	0.046	0.059		0.115	0.034	0.08	0.119
	0.047	0.079	0.079	0.132		0.033	0.277	0.084	0.165
	0.06	0.11	0.11	0.16		0.105	0.302	0.036	0.105
	0.124	0.088	0.088	0.224		0.557	0.238	0.041	0.317
	0.121	0.037	0.037	0.062		0.03	0.101	0.104	0.125
	0.026	0.034	0.034	0.094		0.435	0.119	0.067	0.175
	0.075	0.038	0.038	0.084		0.13	0.175	0.069	0.201
	0.04	0.048	0.048	0.022		0.164	0.052	0.046	0.106
	0.079	0.097	0.097	0.123		0.074	0.081	0.057	0.025
	0.044	0.108	0.108	0.048		0.206	0.135	0.084	0.132
	0.032	0.032	0.032	0.084		0.145	0.049	0.028	0.122
	0.041	0.028	0.028	0.119		0.064	0.119	0.084	0.259
	0.073	0.037	0.037	0.028		0.151	0.062	0.117	0.444
	0.112	0.069	0.069	0.053		0.109	0.053	0.041	0.098
	0.022	0.027	0.027	0.127		0.145	0.047	0.05	0.106
	0.05	0.067	0.067	0.033		0.081	0.051	0.143	0.112
	0.026	0.022	0.022	0.072		0.249	0.108	0.087	0.116
	0.083	0.151	0.151	0.048		0.21	0.117	0.023	0.109
	0.104	0.031	0.031	0.15		0.336	0.044	0.03	0.225
	0.087	0.09	0.09	0.071		0.235	0.242	0.055	0.085
	0.076	0.042	0.042	0.105		0.082	0.059	0.032	0.143
	0.056	0.05	0.05	0.044		0.125	0.342	0.025	0.322
	0.153	0.03	0.03	0.122		0.13	0.136	0.037	0.199
	0.104	0.125	0.125	0.036		0.204	0.075	0.048	0.063
	0.046	0.083	0.083	0.161		0.123	0.031	0.057	0.107
	0.094	0.037	0.037	0.026		0.175	0.13	0.211	0.157
	0.045	0.041	0.041	0.136		0.178	0.061	0.083	0.212
	0.128	0.021	0.021	0.148		0.284	0.022	0.049	0.198
	0.04	0.031	0.031	0.049		0.099	0.116	0.066	0.201
	0.077	0.096	0.096	0.027		0.058	0.081	0.061	0.142
	0.032	0.124	0.124	0.039		0.212	0.025	0.099	0.032
	0.193	0.031	0.031	0.068		0.128	0.031	0.147	0.301
	0.047	0.095	0.095	0.055		0.224	0.446	0.123	0.45
	0.163	0.073	0.073	0.086		0.039	0.1	0.057	0.309
	0.045	0.148	0.148	0.1		0.231	0.324	0.052	0.027
	0.037	0.054	0.054	0.021		0.26	0.097	0.115	0.037
	0.114	0.053	0.053	0.064		0.121	0.065	0.032	0.027
	0.125	0.082	0.082	0.036		0.093	0.129	0.083	0.161
	0.084	0.041	0.041	0.043		0.17	0.123	0.049	0.149
	0.078	0.082	0.082	0.126		0.333	0.133	0.037	0.166
	0.111	0.051	0.051	0.027		0.109	0.136	0.132	0.163
	0.044	0.038	0.038	0.02		0.071	0.158	0.071	0.17
	0.056	0.089	0.089	0.175		0.115	0.213	0.079	0.281
	0.109	0.083	0.083	0.124		0.084	0.096	0.13	0.209
	0.084	0.108	0.108	0.094		0.026	0.182	0.104	0.179
	0.078	0.037	0.037	0.134		0.139	0.161	0.119	0.082
	0.089	0.058	0.058	0.052		0.085	0.034	0.072	0.094
	0.039	0.094	0.094	0.085		0.089	0.141	0.17	0.211
	0.076	0.035	0.035	0.115		0.336	0.04	0.04	0.243
	0.028	0.078	0.078	0.093		0.174	0.07	0.046	0.411
	0.077	0.079	0.079	0.06		0.142	0.161	0.036	0.077
	0.031	0.079	0.079	0.087		0.205	0.165	0.073	0.131
	0.052	0.04	0.04	0.064		0.104	0.139	0.118	0.025
	0.058	0.041	0.041	0.072		0.039	0.173	0.09	0.119
	0.134	0.057	0.057	0.02		0.063	0.205	0.145	0.196
	0.029	0.02	0.02	0.021		0.133	0.048	0.079	0.296
	0.08	0.057	0.057	0.038		0.091	0.112	0.156	0.194
	0.227	0.046	0.046	0.046		0.121	0.228	0.106	0.259
	0.134	0.042	0.042	0.168		0.328	0.092	0.181	0.022
	0.06	0.062	0.062	0.131		0.045	0.146	0.024	0.034
	0.025	0.044	0.044	0.048		0.195	0.148	0.139	0.127
	0.136	0.039	0.039	0.037		0.114	0.079	0.039	0.16
	0.046	0.027	0.027	0.135		0.068	0.118	0.028	0.069
	0.025	0.084	0.084	0.102		0.203	0.056	0.033	0.02
	0.049	0.095	0.095	0.086		0.041	0.123	0.099	0.329
	0.124	0.047	0.047	0.044		0.106	0.067	0.073	0.121
	0.058	0.084	0.084	0.064		0.193	0.036	0.021	0.247
	0.036	0.093	0.093	0.031		0.153	0.189	0.05	0.036
	0.56	0.132	0.132	0.098		0.163	0.076	0.05	0.255
	0.172	0.031	0.031	0.07		0.021	0.034	0.119	0.032
	0.04	0.156	0.156	0.08		0.035	0.138	0.047	0.297
	0.05	0.036	0.036	0.039		0.029	0.082	0.062	0.224
	0.024	0.044	0.044	0.066		0.049	0.1	0.044	0.178
	0.107	0.137	0.137	0.106		0.118	0.25	0.127	0.12
	0.048	0.061	0.061	0.031		0.038	0.149	0.031	0.065
	0.071	0.091	0.091	0.065		0.042	0.027	0.09	0.191
	0.195	0.022	0.022	0.049		0.038	0.02	0.033	0.03
	0.044	0.069	0.069	0.052		0.171	0.121	0.089	0.156
	0.106	0.035	0.035	0.119		0.027	0.026	0.096	0.079
	0.094	0.034	0.034	0.04		0.116	0.111	0.057	0.13
	0.05	0.086	0.086	0.061		0.193	0.094	0.039	0.096
	0.043	0.045	0.045	0.154		0.133	0.115	0.075	0.254
	0.136	0.027	0.027	0.035		0.186	0.062	0.101	0.126
	0.051	0.028	0.028	0.137		0.09	0.154	0.094	0.297
	0.079	0.046	0.046	0.034		0.043	0.101	0.072	0.148
	0.236	0.041	0.041	0.096		0.42	0.145	0.057	0.1
	0.057	0.054	0.054	0.114		0.169	0.102	0.087	0.167
	0.202	0.057	0.057	0.022		0.209	0.021	0.064	0.155
	0.087	0.066	0.066	0.079		0.254	0.052	0.074	0.14
	0.248	0.025	0.025	0.063		0.097	0.032	0.085	0.081
	0.078	0.023	0.023	0.053		0.034	0.032	0.022	0.08
	0.093	0.064	0.064	0.082		0.324	0.102	0.069	0.185
	0.074	0.029	0.029	0.113		0.486	0.068	0.02	0.049
	0.057	0.024	0.024	0.034		0.136	0.035	0.1	0.108
	0.022	0.064	0.064	0.066		0.201	0.043	0.041	0.219
	0.115	0.021	0.021	0.05		0.092	0.051	0.083	0.144
	0.146	0.089	0.089	0.02		0.146	0.126	0.102	0.169
	0.11	0.075	0.075	0.1		0.117	0.041	0.118	0.208
	0.027	0.047	0.047	0.07		0.154	0.211	0.174	0.027
	0.022	0.037	0.037	0.07		0.182	0.084	0.035	0.324
	0.161	0.051	0.051	0.045		0.301	0.075	0.03	0.126
	0.031	0.07	0.07	0.038		0.363	0.147	0.085	0.198
	0.031	0.122	0.122	0.083		0.146	0.154	0.02	0.095
	0.119	0.057	0.057	0.133		0.102	0.206	0.125	0.355
	0.087	0.078	0.078	0.184		0.134	0.061	0.1	0.193
	0.054	0.062	0.062	0.265		0.122	0.078	0.102	0.414
	0.11	0.046	0.046	0.025		0.239	0.037	0.02	0.287
	0.067	0.173	0.173	0.094		0.115	0.039	0.04	0.39
	0.083	0.031	0.031	0.037		0.145	0.025	0.047	0.081
	0.039	0.023	0.023	0.026		0.111	0.248	0.063	0.183
	0.062	0.064	0.064	0.069		0.242	0.092	0.056	0.132
	0.135	0.063	0.063	0.052		0.026	0.035	0.092	0.16
	0.028	0.034	0.034	0.059		0.265	0.15	0.069	0.105
	0.105	0.193	0.193	0.084		0.092	0.029	0.059	0.094
	0.144	0.058	0.058	0.089		0.135	0.134	0.041	0.028
	0.095	0.037	0.037	0.034		0.075	0.074	0.095	0.049
	0.106	0.059	0.059	0.067		0.059	0.113	0.066	0.182
	0.036	0.034	0.034	0.045		0.086	0.033	0.047	0.136
	0.079	0.058	0.058	0.097		0.144	0.097	0.052	0.116
	0.153	0.098	0.098	0.094		0.136	0.08	0.091	0.125
	0.147	0.103	0.103	0.149		0.111	0.085	0.168	0.177
	0.097	0.037	0.037	0.02		0.124	0.17	0.067	0.032
	0.044	0.05	0.05	0.193		0.182	0.104	0.106	0.202
	0.224	0.048	0.048	0.172		0.095	0.091	0.091	0.179
	0.054	0.036	0.036	0.082		0.069	0.083	0.056	0.083
	0.091	0.089	0.089	0.102		0.076	0.288	0.193	0.283
	0.078	0.033	0.033	0.096		0.214	0.119	0.038	0.253
	0.07	0.023	0.023	0.033		0.222	0.152	0.083	0.346
	0.051	0.058	0.058	0.185		0.251	0.091	0.093	0.081
	0.163	0.06	0.06	0.201		0.131	0.219	0.063	0.156
	0.115	0.083	0.083	0.072		0.224	0.096	0.078	0.112
	0.056	0.167	0.167	0.117		0.047	0.169	0.171	0.174
	0.079	0.051	0.051	0.131		0.028	0.041	0.073	0.103
	0.058	0.034	0.034	0.02		0.191	0.165	0.139	0.121
	0.064	0.027	0.027	0.119		0.231	0.058	0.052	0.159
	0.067	0.073	0.073	0.11		0.056	0.051	0.061	0.089
	0.036	0.055	0.055	0.092		0.182	0.084	0.114	0.22
	0.306	0.079	0.079	0.068		0.243	0.077	0.02	0.047
	0.208	0.102	0.102	0.096		0.341	0.077	0.099	0.186
	0.094	0.024	0.024	0.088		0.306	0.037	0.116	0.112
	0.144	0.027	0.027	0.142		0.165	0.061	0.084	0.106
	0.032	0.079	0.079	0.117		0.094	0.061	0.036	0.137
	0.044	0.286	0.286	0.131		0.129	0.275	0.034	0.211
	0.14	0.063	0.063	0.089		0.097	0.043	0.131	0.261
	0.037	0.111	0.111	0.05		0.073	0.132	0.117	0.143
	0.069	0.101	0.101	0.029		0.138	0.06	0.031	0.147
	0.101	0.047	0.047	0.068		0.143	0.066	0.175	0.174
	0.078	0.035	0.035	0.076		0.161	0.049	0.06	0.057
	0.054	0.057	0.057	0.038		0.206	0.021	0.034	0.026
	0.049	0.035	0.035	0.031		0.172	0.092	0.04	0.275
	0.05	0.041	0.041	0.08		0.102	0.021	0.04	0.076
	0.052	0.128	0.128	0.09		0.035	0.106	0.09	0.116
	0.112	0.072	0.072	0.102		0.164	0.193	0.139	0.035
	0.109	0.049	0.049	0.146		0.102	0.044	0.1	0.158
	0.119	0.051	0.051	0.17		0.187	0.087	0.082	0.052
	0.172	0.047	0.047	0.035		0.077	0.125	0.073	0.192
	0.032	0.067	0.067	0.083		0.171	0.091	0.147	0.196
	0.206	0.066	0.066	0.098		0.162	0.12	0.088	0.203
	0.141	0.038	0.038	0.144		0.032	0.034	0.059	0.028
	0.052	0.129	0.129	0.116		0.125	0.171	0.084	0.33
	0.024	0.066	0.066	0.167		0.198	0.033	0.06	0.075
	0.046	0.139	0.139	0.03		0.175	0.045	0.03	0.12
	0.043	0.131	0.131	0.034		0.056	0.121	0.173	0.091
	0.05	0.054	0.054	0.052		0.064	0.116	0.09	0.258
	0.08	0.164	0.164	0.03		0.213	0.354	0.055	0.105
	0.122	0.064	0.064	0.088		0.057	0.134	0.023	0.096
	0.123	0.056	0.056	0.081		0.074	0.108	0.222	0.482
	0.062	0.065	0.065	0.127		0.071	0.023	0.109	0.053
	0.036	0.08	0.08	0.063		0.039	0.125	0.114	0.031
	0.043	0.03	0.03	0.122		0.115	0.055	0.084	0.28
	0.081	0.132	0.132	0.07		0.148	0.039	0.027	0.079
	0.15	0.07	0.07	0.116		0.135	0.104	0.047	0.15
	0.053	0.055	0.055	0.081		0.15	0.04	0.119	0.062
	0.06	0.093	0.093	0.027		0.186	0.042	0.057	0.063
	0.029	0.037	0.037	0.034		0.146	0.037	0.042	0.193
	0.14	0.03	0.03	0.108		0.163	0.179	0.073	0.06
	0.07	0.023	0.023	0.114		0.17	0.063	0.053	0.312
	0.035	0.06	0.06	0.072		0.051	0.101	0.071	0.18
	0.159	0.028	0.028	0.024		0.137	0.084	0.192	0.054
	0.108	0.11	0.11	0.086		0.07	0.084	0.052	0.216
	0.026	0.058	0.058	0.116		0.147	0.177	0.079	0.146
	0.025	0.111	0.111	0.027		0.178	0.047	0.111	0.142
	0.063	0.086	0.086	0.053		0.039	0.042	0.043	0.186
	0.135	0.029	0.029	0.025		0.186	0.079	0.09	0.106
	0.209	0.09	0.09	0.093		0.059	0.082	0.071	0.228
	0.063	0.058	0.058	0.026		0.097	0.1	0.021	0.091
	0.031	0.054	0.054	0.094		0.026	0.192	0.067	0.1
	0.213	0.078	0.078	0.085		0.112	0.025	0.138	0.056
	0.059	0.07	0.07	0.053		0.119	0.189	0.102	0.07
	0.074	0.079	0.079	0.028		0.174	0.114	0.034	0.066
	0.079	0.03	0.03	0.06		0.193	0.044	0.136	0.277
	0.106	0.105	0.105	0.061		0.053	0.095	0.072	0.2
	0.049	0.042	0.042	0.149		0.265	0.072	0.028	0.182
	0.135	0.119	0.119	0.073		0.079	0.033	0.067	0.066
	0.063	0.138	0.138	0.057		0.05	0.041	0.044	0.145
	0.085	0.031	0.031	0.079		0.165	0.069	0.057	0.027
	0.023	0.04	0.04	0.035		0.036	0.03	0.021	0.307
	0.034	0.042	0.042	0.029		0.18	0.034	0.184	0.131
	0.072	0.164	0.164	0.066		0.142	0.263	0.1	0.031
	0.066	0.075	0.075	0.067		0.296	0.118	0.148	0.146
	0.128	0.059	0.059	0.057		0.546	0.1	0.083	0.191
	0.076	0.092	0.092	0.033		0.151	0.044	0.117	0.124
	0.035	0.054	0.054	0.082		0.264	0.022	0.126	0.133
	0.032	0.088	0.088	0.041		0.044	0.122	0.104	0.134
	0.369	0.068	0.068	0.069		0.194	0.07	0.244	0.281
	0.072	0.057	0.057	0.138		0.157	0.117	0.068	0.22
	0.183	0.035	0.035	0.097		0.121	0.022	0.064	0.184
	0.382	0.079	0.079	0.025		0.125	0.092	0.037	0.153
	0.158	0.089	0.089	0.039		0.15	0.029	0.473	0.144
	0.064	0.08	0.08	0.051		0.055	0.03	0.033	0.029
	0.069	0.034	0.034	0.084		0.076	0.083	0.033	0.149
	0.118	0.041	0.041	0.04		0.024	0.022	0.078	0.471
	0.042	0.025	0.025	0.095		0.279	0.182	0.193	0.511
	0.023	0.026	0.026	0.186		0.187	0.052	0.095	0.38
	0.045	0.035	0.035	0.097		0.141	0.062	0.072	0.103
	0.086	0.033	0.033	0.16		0.185	0.072	0.058	0.161
	0.042	0.032	0.032	0.093		0.125	0.135	0.18	0.175
	0.079	0.047	0.027	0.041		0.26	0.072	0.135	0.33
	0.136	0.069	0.047	0.126		0.049	0.158	0.081	0.207
	0.11	0.04	0.156	0.171		0.125	0.023	0.145	0.026
	0.029	0.027	0.054	0.17		0.346	0.277	0.02	0.157
	0.112	0.042	0.052	0.112		0.581	0.034	0.039	0.025
	0.125	0.193	0.046	0.147		0.027	0.077	0.125	0.101
	0.044	0.072	0.057	0.084		0.131	0.086	0.18	0.23
	0.067	0.034	0.044	0.162		0.115	0.233	0.103	0.101
	0.056	0.024	0.047	0.101		0.091	0.126	0.193	0.152
	0.025	0.152	0.072	0.04		0.387	0.103	0.069	0.095
	0.128	0.035	0.299	0.108		0.457	0.232	0.033	0.069
	0.055	0.068	0.058	0.059		0.236	0.047	0.039	0.286
	0.378	0.028	0.117	0.058		0.203	0.129	0.031	0.209
	0.054	0.061	0.094	0.072		0.169	0.037	0.052	0.193
	0.025	0.064	0.031	0.057		0.214	0.055	0.225	0.266
	0.079	0.078	0.027	0.152		0.249	0.028	0.041	0.174
	0.079	0.034	0.042	0.069		0.216	0.142	0.227	0.176
	0.113	0.321	0.041	0.095		0.111	0.07	0.046	0.227
	0.047	0.035	0.131	0.148		0.158	0.055	0.524	0.058
	0.053	0.062	0.021	0.064		0.029	0.155	0.046	0.131
	0.059	0.052	0.073	0.248		0.102	0.127	0.087	0.217
	0.196	0.157	0.022	0.099		0.069	0.039	0.039	0.198
	0.049	0.23	0.069	0.058		0.118	0.049	0.058	0.334
	0.021	0.032	0.049	0.075		0.11	0.364	0.077	0.184
	0.127	0.028	0.056	0.064		0.063	0.077	0.023	0.245
	0.027	0.049	0.146	0.349		0.126	0.095	0.034	0.061
	0.078	0.041	0.079	0.022		0.132	0.063	0.074	0.023
	0.092	0.458	0.036	0.068		0.078	0.091	0.154	0.21
	0.051	0.212	0.13	0.035		0.096	0.125	0.051	0.174
	0.027	0.043	0.031	0.034		0.24	0.044	0.097	0.108
	0.05	0.037	0.092	0.128		0.095	0.03	0.061	0.052
	0.352	0.192	0.025	0.064		0.034	0.189	0.121	0.03
	0.115	0.046	0.126	0.067		0.155	0.092	0.028	0.118
	0.064	0.028	0.027	0.042		0.177	0.094	0.122	0.253
	0.157	0.09	0.072	0.028		0.412	0.025	0.025	0.108
	0.148	0.025	0.047	0.072		0.18	0.02	0.123	0.102
	0.116	0.152	0.047	0.123		0.15	0.075	0.071	0.059
	0.063	0.511	0.096	0.138		0.114	0.07	0.063	0.347
	0.095	0.079	0.049	0.093		0.025	0.072	0.249	0.075
	0.028	0.02	0.204	0.06		0.066	0.076	0.03	0.216
	0.027	0.071	0.064	0.029		0.128	0.185	0.024	0.054
	0.073	0.055	0.042	0.065		0.104	0.049	0.09	0.03
	0.122	0.02	0.05	0.036		0.101	0.037	0.105	0.159
	0.054	0.036	0.082	0.094		0.169	0.071	0.051	0.136
	0.043	0.254	0.08	0.084		0.027	0.22	0.039	0.314
	0.038	0.134	0.045	0.057		0.158	0.079	0.134	0.071
	0.113	0.042	0.095	0.122		0.036	0.125	0.113	0.18
	0.08	0.069	0.126	0.082		0.122	0.084	0.149	0.153
	0.044	0.424	0.063	0.11		0.102	0.119	0.034	0.111
	0.027	0.044	0.07	0.038		0.144	0.033	0.101	0.223
	0.042	0.083	0.033	0.078		0.127	0.043	0.22	0.164
	0.038	0.145	0.051	0.045		0.209	0.129	0.071	0.229
	0.071	0.075	0.081	0.078		0.026	0.293	0.075	0.109
	0.056	0.079	0.101	0.125		0.151	0.208	0.033	0.264
	0.057	0.034	0.088	0.158		0.147	0.095	0.064	0.126
	0.046	0.085	0.068	0.088		0.148	0.054	0.138	0.086
	0.045	0.077	0.043	0.118		0.223	0.035	0.072	0.083
	0.097	0.048	0.024	0.052		0.117	0.058	0.021	0.028
	0.038	0.021	0.075	0.075		0.099	0.138	0.129	0.232
	0.049	0.02	0.071	0.051		0.108	0.027	0.271	0.085
	0.026	0.173	0.093	0.063		0.04	0.444	0.083	0.24
	0.043	0.034	0.036	0.057		0.179	0.049	0.147	0.264
	0.182	0.022	0.07	0.055		0.357	0.04	0.078	0.041
	0.079	0.146	0.043	0.109		0.202	0.107	0.074	0.261
	0.112	0.089	0.068	0.128		0.078	0.077	0.056	0.113
	0.057	0.087	0.052	0.072		0.12	0.053	0.053	0.207
	0.125	0.117	0.081	0.105		0.118	0.091	0.056	0.286
	0.099	0.039	0.099	0.125		0.193	0.084	0.098	0.228
	0.097	0.07	0.108	0.02		0.157	0.022	0.121	0.049
	0.332	0.2	0.08	0.144		0.071	0.092	0.058	0.394
	0.058	0.054	0.097	0.117		0.069	0.089	0.127	0.298
	0.339	0.054	0.065	0.088		0.023	0.023	0.077	0.246
	0.079	0.034	0.058	0.051		0.079	0.056	0.034	0.193
	0.029	0.025	0.11	0.025		0.157	0.033	0.041	0.06
	0.054	0.097	0.024	0.034		0.104	0.025	0.073	0.198
	0.081	0.102	0.062	0.162		0.033	0.052	0.09	0.105
	0.06	0.093	0.087	0.031		0.071	0.077	0.081	0.211
	0.135	0.034	0.088	0.086		0.355	0.143	0.076	0.15
	0.024	0.124	0.03	0.08		0.077	0.089	0.11	0.088
	0.059	0.059	0.028	0.075		0.101	0.025	0.031	0.061
	0.031	0.066	0.046	0.121		0.095	0.175	0.052	0.134
	0.051	0.079	0.048	0.067		0.241	0.226	0.148	0.148
	0.203	0.037	0.04	0.14		0.091	0.079	0.116	0.205
	0.058	0.023	0.073	0.046		0.059	0.049	0.138	0.193
	0.068	0.13	0.121	0.06		0.169	0.064	0.157	0.044
	0.105	0.051	0.037	0.131		0.314	0.046	0.026	0.088
	0.042	0.111	0.071	0.089		0.089	0.079	0.144	0.062
	0.057	0.129	0.134	0.041		0.189	0.039	0.039	0.251
	0.025	0.198	0.101	0.125		0.189	0.193	0.073	0.12
	0.022	0.175	0.026	0.075		0.057	0.194	0.026	0.039
	0.069	0.056	0.057	0.05		0.253	0.051	0.177	0.188
	0.129	0.141	0.062	0.128		0.33	0.03	0.056	0.17
	0.158	0.038	0.057	0.049		0.117	0.102	0.095	0.07
	1.098	0.035	0.029	0.066		0.061	0.021	0.049	0.126
	0.049	0.032	0.071	0.129		0.225	0.123	0.089	0.248
	0.095	0.032	0.146	0.079		0.027	0.078	0.189	0.297
	0.03	0.064	0.078	0.05		0.227	0.155	0.043	0.316
	0.059	0.02	0.093	0.077		0.161	0.046	0.192	0.341
	0.032	0.141	0.099	0.117		0.226	0.17	0.046	0.217
	0.057	0.118	0.061	0.044		0.11	0.188	0.027	0.28
	0.064	0.062	0.14	0.079		0.049	0.057	0.118	0.09
	0.062	0.394	0.081	0.049		0.134	0.059	0.041	0.034
	0.082	0.026	0.086	0.126		0.073	0.091	0.12	0.139
	0.2	0.517	0.151	0.029		0.109	0.023	0.172	0.062
	0.033	0.082	0.085	0.105		0.08	0.293	0.188	0.022
	0.057	0.294	0.029	0.181		0.057	0.036	0.328	0.221
	0.044	0.046	0.066	0.126		0.067	0.027	0.076	0.034
	0.121	0.031	0.064	0.091		0.089	0.023	0.152	0.059
	0.086	0.021	0.15	0.047		0.058	0.038	0.133	0.187
	0.048	0.112	0.044	0.055		0.025	0.11	0.13	0.213
	0.099	0.17	0.115	0.031		0.125	0.074	0.023	0.193
	0.129	0.159	0.15	0.038		0.342	0.033	0.134	0.039
	0.229	0.031	0.074	0.087		0.038	0.031	0.102	0.273
	0.049	0.166	0.097	0.083		0.167	0.085	0.026	0.185
	0.102	0.087	0.045	0.029		0.208	0.029	0.099	0.144
	0.084	0.346	0.049	0.041		0.118	0.091	0.047	0.102
	0.471	0.102	0.046	0.079		0.212	0.04	0.086	0.42
	0.06	0.084	0.042	0.094		0.075	0.057	0.257	0.194
	0.056	0.102	0.045	0.041		0.021	0.248	0.036	0.085
	0.127	0.127	0.094	0.052		0.094	0.035	0.114	0.026
	0.11	0.034	0.078	0.073		0.195	0.117	0.158	0.066
	0.062	0.069	0.057	0.041		0.256	0.02	0.052	0.105
	0.028	0.056	0.041	0.029		0.12	0.03	0.11	0.029
	0.101	0.098	0.096	0.1		0.55	0.044	0.066	0.174
	0.084	0.117	0.021	0.054		0.091	0.079	0.073	0.277
	0.082	0.048	0.083	0.05		0.39	0.065	0.086	0.343
	0.093	0.091	0.081	0.067		0.047	0.147	0.038	0.235
	0.164	0.197	0.113	0.031		0.124	0.04	0.092	0.183
	0.083	0.086	0.062	0.27		0.06	0.05	0.267	0.259
	0.027	0.154	0.072	0.178		0.136	0.033	0.153	0.226
	0.024	0.044	0.057	0.052		0.03	0.041	0.071	0.197
	0.027	0.045	0.043	0.039		0.136	0.065	0.027	0.21
	0.352	0.022	0.037	0.083		0.075	0.02	0.179	0.2
	0.059	0.101	0.041	0.05		0.053	0.101	0.111	0.194
	0.032	0.023	0.122	0.023		0.117	0.119	0.135	0.033
	0.026	0.373	0.035	0.139		0.286	0.162	0.216	0.115
	0.036	0.09	0.059	0.054		0.089	0.176	0.174	0.123
	0.099	0.119	0.05	0.151		0.307	0.045	0.187	0.445
	0.061	0.176	0.07	0.103		0.248	0.052	0.265	0.103
	0.093	0.024	0.143	0.116		0.121	0.062	0.024	0.112
	0.106	0.026	0.056	0.093		0.167	0.115	0.299	0.15
	0.218	0.224	0.07	0.132		0.109	0.034	0.053	0.244
	0.263	0.094	0.063	0.128		0.174	0.066	0.053	0.352
	0.171	0.189	0.054	0.105		0.079	0.2	0.206	0.037
	0.247	0.136	0.039	0.105		0.026	0.042	0.09	0.159
	0.115	0.043	0.098	0.06		0.033	0.026	0.125	0.108
	0.13	0.163	0.025	0.073		0.378	0.115	0.115	0.084
	0.046	0.07	0.027	0.05		0.046	0.028	0.031	0.165
	0.056	0.031	0.066	0.068		0.056	0.075	0.049	0.267
	0.214	0.103	0.037	0.083		0.225	0.021	0.23	0.263
	0.15	0.033	0.034	0.064		0.054	0.098	0.023	0.091
	0.156	0.051	0.041	0.035		0.052	0.077	0.041	0.116
	0.148	0.029	0.102	0.172		0.23	0.093	0.022	0.201
	0.063	0.029	0.02	0.055		0.094	0.035	0.028	0.121
	0.079	0.193	0.057	0.116		0.327	0.15	0.099	0.079
	0.021	0.157	0.103	0.095		0.16	0.057	0.057	0.219
	0.035	0.046	0.081	0.027		0.199	0.029	0.172	0.171
	0.059	0.052	0.134	0.02		0.175	0.128	0.097	0.27
	0.076	0.023	0.087	0.053		0.106	0.085	0.021	0.154
	0.025	0.039	0.091	0.047		0.029	0.061	0.119	0.171
	0.059	0.043	0.354	0.219		0.076	0.146	0.058	0.149
	0.044	0.09	0.087	0.146		0.044	0.068	0.118	0.025
	0.114	0.094	0.055	0.133		0.141	0.035	0.191	0.182
	0.031	0.044	0.216	0.063		0.036	0.163	0.102	0.171
	0.096	0.074	0.02	0.092		0.082	0.034	0.036	0.226
	0.029	0.061	0.108	0.073		0.287	0.11	0.214	0.13
	0.07	0.083	0.115	0.121		0.039	0.08	0.177	0.159
	0.033	0.667	0.036	0.021		0.212	0.065	0.244	0.369
	0.023	0.046	0.041	0.133		0.066	0.098	0.035	0.122
	0.042	0.102	0.116	0.113		0.074	0.168	0.11	0.312
	0.117	0.042	0.065	0.047		0.155	0.033	0.032	0.119
	0.025	0.17	0.04	0.03		0.187	0.025	0.169	0.321
	0.082	0.05	0.079	0.052		0.036	0.066	0.037	0.173
	0.042	0.114	0.055	0.08		0.309	0.13	0.286	0.07
	0.057	0.048	0.057	0.084		0.075	0.048	0.116	0.097
	0.057	0.036	0.039	0.083		0.165	0.088	0.088	0.065
	0.096	0.028	0.024	0.141		0.168	0.02	0.057	0.239
	0.043	0.055	0.066	0.102		0.139	0.081	0.042	0.026
	0.067	0.03	0.048	0.099		0.149	0.066	0.121	0.258
	0.055	0.214	0.106	0.088		0.227	0.026	0.148	0.142
	0.09	0.375	0.062	0.094		0.203	0.117	0.031	0.214
	0.027	0.281	0.063	0.045		0.087	0.033	0.131	0.276
	0.022	0.034	0.046	0.069		0.15	0.076	0.156	0.214
	0.102	0.097	0.058	0.035		0.049	0.078	0.087	0.197
	0.086	0.091	0.034	0.111		0.084	0.024	0.116	0.206
	0.05	0.394	0.068	0.028		0.286	0.135	0.168	0.078
	0.054	0.034	0.063	0.097		0.091	0.039	0.054	0.362
	0.039	0.07	0.154	0.086		0.058	0.203	0.185	0.301
	0.062	0.032	0.188	0.163		0.216	0.129	0.215	0.361
	0.116	0.034	0.047	0.113		0.202	0.079	0.065	0.158
	0.124	0.115	0.108	0.068		0.103	0.31	0.092	0.084
	0.048	0.092	0.051	0.113		0.237	0.154	0.157	0.114
	0.079	0.113	0.124	0.041		0.159	0.022	0.148	0.108
	0.038	0.102	0.042	0.115		0.197	0.184	0.049	0.183
	0.025	0.133	0.075	0.049		0.185	0.095	0.064	0.23
	0.069	0.087	0.074	0.035		0.153	0.062	0.084	0.138
	0.045	0.276	0.195	0.117		0.317	0.123	0.122	0.102
	0.146	0.042	0.091	0.073		0.142	0.135	0.147	0.122
	0.021	0.038	0.117	0.044		0.182	0.152	0.14	0.148
	0.035	0.142	0.039	0.154		0.137	0.027	0.159	0.136
	0.037	0.235	0.027	0.048		0.302	0.173	0.244	0.206
	0.113	0.141	0.144	0.048		0.042	0.038	0.121	0.148
	0.05	0.027	0.028	0.147		0.073	0.071	0.152	0.656
	0.163	0.068	0.141	0.036		0.075	0.072	0.096	0.288
	0.052	0.084	0.021	0.062		0.028	0.143	0.125	0.123
	0.04	0.221	0.099	0.034		0.143	0.034	0.123	0.091
	0.047	0.104	0.053	0.102		0.105	0.077	0.101	0.078
	0.053	0.073	0.051	0.064		0.159	0.202	0.031	0.316
	0.04	0.113	0.041	0.053		0.208	0.187	0.125	0.162
	0.057	0.216	0.03	0.04		0.047	0.1	0.04	0.244
	0.125	0.039	0.079	0.063		0.146	0.071	0.116	0.123
	0.082	0.057	0.077	0.063		0.177	0.026	0.188	0.478
	0.067	0.076	0.07	0.027		0.119	0.043	0.072	0.041
	0.045	0.105	0.081	0.235		0.06	0.043	0.03	0.056
	0.023	0.022	0.066	0.03		0.125	0.132	0.243	0.072
	0.054	0.186	0.101	0.253		0.262	0.045	0.06	0.155
	0.037	0.088	0.084	0.084		0.122	0.179	0.165	0.17
	0.034	0.029	0.037	0.089		0.181	0.027	0.193	0.301
	0.101	0.081	0.079	0.079		0.314	0.026	0.103	0.02
	0.036	0.063	0.136	0.075		0.246	0.039	0.06	0.138
	0.088	0.044	0.067	0.088		0.484	0.024	0.128	0.032
	0.064	0.042	0.174	0.031		0.185	0.022	0.26	0.177
	0.057	0.108	0.16	0.051		0.184	0.08	0.055	0.105
	0.106	0.036	0.04	0.098		0.185	0.144	0.092	0.277
	0.054	0.119	0.095	0.11		0.095	0.156	0.144	0.145
	0.056	0.113	0.084	0.099		0.341	0.195	0.539	0.04
	0.035	0.052	0.171	0.055		0.047	0.057	0.06	0.072
	0.081	0.075	0.021	0.055		0.126	0.215	0.06	0.194
	0.093	0.054	0.066	0.094		0.189	0.118	0.067	0.125
	0.046	0.037	0.089	0.198		0.07	0.055	0.236	0.24
	0.064	0.05	0.04	0.021		0.057	0.14	0.047	0.071
	0.169	0.022	0.063	0.12		0.136	0.02	0.08	0.127
	0.036	0.067	0.034	0.184		0.202	0.02	0.185	0.094
	0.141	0.033	0.21	0.026		0.103	0.194	0.092	0.141
	0.102	0.113	0.101	0.161		0.234	0.116	0.147	0.197
	0.081	0.486	0.082	0.041		0.139	0.073	0.05	0.374
	0.208	0.08	0.082	0.315		0.062	0.119	0.129	0.233
	0.053	0.057	0.06	0.143		0.041	0.14	0.07	0.089
	0.026	0.037	0.048	0.102		0.164	0.098	0.03	0.033
	0.169	0.109	0.079	0.053		0.084	0.222	0.225	0.295
	0.044	0.081	0.096	0.094		0.057	0.04	0.102	0.154
	0.035	0.064	0.166	0.091		0.045	0.027	0.126	0.111
	0.168	0.066	0.028	0.082		0.165	0.143	0.141	0.063
	0.094	0.03	0.04	0.18		0.072	0.083	0.054	0.101
	0.07	0.185	0.049	0.112		0.04	0.188	0.039	0.299
	0.033	0.05	0.083	0.057		0.187	0.085	0.252	0.211
	0.059	0.04	0.055	0.089		0.203	0.161	0.318	0.312
	0.103	0.02	0.077	0.039		0.188	0.081	0.233	0.205
	0.093	0.103	0.037	0.073		0.103	0.094	0.174	0.299
	0.191	0.057	0.064	0.038		0.148	0.026	0.058	0.247
	0.033	0.022	0.14	0.074		0.071	0.188	0.277	0.126
	0.138	0.066	0.03	0.064		0.063	0.136	0.062	0.224
	0.047	0.115	0.026	0.062		0.081	0.089	0.343	0.121
	0.081	0.105	0.039	0.047		0.276	0.099	0.04	0.055
	0.076	0.057	0.053	0.062		0.17	0.095	0.036	0.275
	0.06	0.123	0.079	0.104		0.107	0.024	0.239	0.078
	0.121	0.033	0.124	0.172		0.092	0.123	0.314	0.062
	0.046	0.073	0.033	0.13		0.033	0.193	0.126	0.078
	0.126	0.061	0.05	0.09		0.118	0.425	0.074	0.116
	0.068	0.046	0.101	0.091		0.159	0.109	0.034	0.1
	0.043	0.097	0.047	0.087		0.083	0.185	0.175	0.071
	0.057	0.116	0.037	0.046		0.296	0.034	0.036	0.085
	0.092	0.047	0.028	0.07		0.037	0.078	0.142	0.812
	0.089	0.049	0.102	0.078		0.165	0.213	0.071	0.392
	0.05	0.027	0.062	0.065		0.273	0.17	0.128	0.113
	0.059	0.035	0.025	0.057		0.192	0.238	0.024	0.035
	0.064	0.027	0.085	0.184		0.235	0.126	0.122	0.107
	0.027	0.047	0.027	0.123		0.147	0.089	0.044	0.102
	0.116	0.041	0.125	0.125		0.143	0.105	0.079	0.178
	0.054	0.04	0.02	0.082		0.043	0.059	0.078	0.232
	0.113	0.062	0.123	0.115		0.074	0.152	0.039	0.05
	0.059	0.06	0.037	0.099		0.332	0.095	0.091	0.108
	0.025	0.023	0.119	0.055		0.06	0.028	0.098	0.246
	0.027	0.082	0.027	0.158		0.059	0.033	0.187	0.143
	0.111	0.046	0.061	0.1		0.194	0.237	0.131	0.17
	0.052	0.071	0.154	0.039		0.37	0.185	0.135	0.125
	0.096	0.073	0.066	0.045		0.021	0.106	0.051	0.119
	0.125	0.071	0.309	0.109		0.047	0.037	0.139	0.399
	0.056	0.039	0.023	0.129		0.25	0.189	0.145	0.024
	0.033	0.023	0.04	0.035		0.077	0.07	0.13	0.359
	0.066	0.067	0.087	0.033		0.26	0.227	0.194	0.159
	0.024	0.074	0.099	0.082		0.039	0.03	0.148	0.284
	0.097	0.039	0.049	0.098		0.05	0.146	0.26	0.038
	0.074	0.282	0.388	0.113		0.125	0.136	0.154	0.25
	0.021	0.076	0.022	0.106		0.238	0.157	0.176	0.125
	0.039	0.032	0.056	0.125		0.208	0.313	0.126	0.034
	0.03	0.079	0.047	0.07		0.136	0.054	0.146	0.216
	0.035	0.062	0.034	0.107		0.156	0.114	0.02	0.05
	0.061	0.036	0.062	0.159		0.077	0.127	0.074	0.084
	0.095	0.136	0.089	0.029		0.088	0.053	0.104	0.489
	0.12	0.037	0.093	0.099		0.085	0.083	0.15	0.208
	0.034	0.057	0.034	0.027		0.193	0.056	0.116	0.2
	0.045	0.034	0.107	0.042		0.043	0.181	0.252	0.159
	0.11	0.025	0.044	0.024		0.023	0.043	0.082	0.202
	0.039	0.045	0.089	0.052		0.164	0.093	0.195	0.084
	0.109	0.079	0.037	0.22		0.129	0.133	0.054	0.297
	0.02	0.021	0.04	0.063		0.244	0.169	0.116	0.367
	0.022	0.066	0.099	0.188		0.07	0.193	0.121	0.275
	0.193	0.028	0.033	0.128		0.247	0.133	0.028	0.117
	0.043	0.091	0.068	0.038		0.048	0.177	0.247	0.031
	0.114	0.136	0.127	0.056		0.205	0.167	0.191	0.034
	0.093	0.029	0.039	0.061		0.126	0.074	0.091	0.029
	0.055	0.071	0.029	0.057		0.224	0.244	0.191	0.181
	0.111	0.032	0.029	0.103		0.195	0.276	0.137	0.199
	0.18	0.125	0.028	0.081		0.164	0.088	0.025	0.474
	0.168	0.107	0.088	0.046		0.082	0.084	0.033	0.232
	0.134	0.021	0.087	0.2		0.027	0.051	0.097	0.148
	0.035	0.049	0.083	0.131		0.233	0.036	0.046	0.164
	0.087	0.049	0.048	0.158		0.06	0.041	0.148	0.029
	0.078	0.051	0.154	0.09		0.021	0.061	0.214	0.125
	0.057	0.026	0.044	0.133		0.147	0.165	0.24	0.488
	0.106	0.097	0.033	0.181		0.168	0.028	0.255	0.041
	0.023	0.027	0.024	0.057		0.195	0.232	0.065	0.087
	0.051	0.028	0.057	0.028		0.198	0.076	0.122	0.035
	0.114	0.036	0.19	0.076		0.214	0.186	0.096	0.131
	0.079	0.033	0.073	0.049		0.08	0.164	0.258	0.274
	0.067	0.13	0.053	0.041		0.025	0.237	0.137	0.173
	0.038	0.063	0.023	0.054		0.307	0.036	0.041	0.141
	0.117	0.057	0.056	0.046		0.169	0.047	0.058	0.131
	0.054	0.035	0.041	0.169		0.052	0.021	0.084	0.231
	0.055	0.044	0.054	0.062		0.05	0.142	0.075	0.034
	0.065	0.04	0.03	0.053		0.044	0.111	0.134	0.161
	0.074	0.02	0.05	0.182		0.244	0.111	0.076	0.228
	0.052	0.072	0.053	0.058		0.194	0.182	0.151	0.04
	0.02	0.071	0.034	0.038		0.197	0.079	0.156	0.304
	0.157	0.068	0.145	0.133		0.165	0.193	0.04	0.342
	0.041	0.046	0.044	0.077		0.093	0.067	0.125	0.12
	0.068	0.034	0.077	0.027		0.138	0.027	0.126	0.271
	0.036	0.079	0.024	0.184		0.22	0.169	0.102	0.026
	0.034	0.031	0.024	0.15		0.117	0.233	0.102	0.05
	0.057	0.037	0.054	0.048		0.034	0.097	0.15	0.41
	0.022	0.035	0.084	0.074		0.241	0.14	0.185	0.078
	0.191	0.055	0.087	0.029		0.024	0.075	0.214	0.131
	0.076	0.062	0.069	0.114		0.31	0.033	0.248	0.094
	0.076	0.035	0.042	0.073		0.172	0.076	0.273	0.047
	0.048	0.02	0.166	0.058		0.04	0.164	0.193	0.068
	0.067	0.052	0.04	0.102		0.078	0.042	0.134	0.081
	0.142	0.033	0.099	0.058		0.219	0.074	0.119	0.05
	0.046	0.079	0.045	0.027		0.03	0.051	0.104	0.038
	0.033	0.051	0.031	0.092		0.197	0.066	0.089	0.084
	0.021	0.033	0.076	0.093		0.037	0.021	0.094	0.294
	0.106	0.045	0.083	0.125		0.172	0.085	0.036	0.151
	0.103	0.064	0.033	0.023		0.051	0.042	0.041	0.193
	0.054	0.029	0.061	0.053		0.124	0.094	0.047	0.159
	0.105	0.025	0.084	0.099		0.093	0.318	0.217	0.109
	0.199	0.069	0.052	0.089		0.259	0.095	0.058	0.064
	0.029	0.021	0.055	0.216		0.165	0.076	0.121	0.049
	0.158	0.09	0.036	0.097		0.075	0.195	0.102	0.152
	0.064	0.139	0.036	0.086		0.29	0.275	0.084	0.279
	0.086	0.13	0.165	0.1		0.142	0.164	0.086	0.193
	0.102	0.031	0.037	0.101		0.178	0.04	0.107	0.028
	0.132	0.02	0.03	0.18		0.205	0.041	0.14	0.056
	0.061	0.024	0.056	0.047		0.076	0.13	0.081	0.229
	0.108	0.032	0.068	0.038		0.146	0.117	0.041	0.088
	0.159	0.057	0.091	0.076		0.178	0.067	0.045	0.341
	0.021	0.02	0.024	0.113		0.187	0.151	0.145	0.024
	0.088	0.048	0.047	0.102		0.102	0.187	0.079	0.217
	0.047	0.022	0.116	0.1		0.201	0.224	0.109	0.204
	0.197	0.105	0.048	0.038		0.148	0.078	0.086	0.057
	0.052	0.06	0.047	0.094		0.055	0.02	0.102	0.207
	0.041	0.038	0.06	0.094		0.235	0.044	0.084	0.228
	0.14	0.057	0.073	0.169		0.198	0.134	0.076	0.031
	0.17	0.061	0.06	0.079		0.389	0.023	0.028	0.378
	0.035	0.046	0.044	0.15		0.057	0.143	0.046	0.046
	0.086	0.057	0.098	0.101		0.12	0.095	0.025	0.657
	0.075	0.092	0.106	0.089		0.069	0.175	0.075	0.2
	0.052	0.034	0.048	0.045		0.199	0.227	0.102	0.211
	0.033	0.228	0.119	0.075		0.021	0.049	0.123	0.134
	0.039	0.046	0.051	0.053		0.087	0.022	0.125	0.026
	0.028	0.026	0.047	0.089		0.165	0.07	0.022	0.14
	0.082	0.075	0.051	0.068		0.158	0.024	0.109	0.106
	0.072	0.069	0.043	0.05		0.207	0.136	0.189	0.2
	0.106	0.058	0.026	0.18		0.114	0.34	0.063	0.034
	0.057	0.048	0.088	0.075		0.232	0.102	0.129	0.135
	0.076	0.045	0.027	0.054		0.247	0.125	0.091	0.288
	0.045	0.046	0.064	0.078		0.153	0.17	0.269	0.138
	0.104	0.02	0.111	0.02		0.057	0.103	0.096	0.224
	0.057	0.079	0.088	0.147		0.023	0.17	0.228	0.257
	0.094	0.098	0.261	0.261		0.199	0.03	0.216	0.125
	0.029	0.048	0.042	0.022		0.132	0.049	0.113	0.145
	0.11	0.045	0.109	0.205		0.115	0.037	0.052	0.295
	0.077	0.028	0.096	0.128		0.076	0.075	0.12	0.193
	0.051	0.037	0.066	0.043		0.092	0.053	0.043	0.115
	0.079	0.055	0.046	0.033		0.202	0.076	0.039	0.242
	0.02	0.054	0.102	0.035		0.282	0.084	0.128	0.238
	0.074	0.076	0.025	0.034		0.347	0.025	0.046	0.144
	0.05	0.146	0.206	0.162		0.105	0.042	0.022	0.138
	0.029	0.039	0.032	0.083		0.154	0.061	0.05	0.24
	0.066	0.044	0.038	0.022		0.119	0.156	0.047	0.112
	0.048	0.038	0.096	0.081		0.098	0.034	0.041	0.17
	0.077	0.12	0.081	0.025		0.263	0.031	0.155	0.109
	0.085	0.025	0.023	0.064		0.394	0.125	0.061	0.191
	0.113	0.142	0.035	0.101		0.182	0.185	0.14	0.056
	0.062	0.24	0.107	0.029		0.218	0.032	0.155	0.157
	0.103	0.03	0.031	0.13		0.227	0.091	0.035	0.118
	0.069	0.04	0.064	0.045		0.258	0.125	0.052	0.382
	0.041	0.02	0.091	0.153		0.025	0.045	0.034	0.209
	0.079	0.044	0.026	0.247		0.14	0.048	0.026	0.29
	0.076	0.054	0.087	0.101		0.062	0.137	0.207	0.256
	0.09	0.055	0.069	0.078		0.058	0.228	0.121	0.129
	0.073	0.067	0.052	0.094		0.153	0.043	0.138	0.22
	0.078	0.048	0.092	0.04		0.235	0.074	0.164	0.275
	0.04	0.068	0.078	0.025		0.141	0.259	0.119	0.202
	0.052	0.074	0.058	0.132		0.049	0.02	0.074	0.191
	0.044	0.166	0.076	0.041		0.09	0.122	0.221	0.184
	0.058	0.025	0.2	0.062		0.076	0.129	0.143	0.192
	0.065	0.051	0.098	0.086		0.207	0.24	0.171	0.037
	0.123	0.143	0.094	0.039		0.122	0.092	0.095	0.163
	0.058	0.059	0.036	0.097		0.276	0.041	0.126	0.15
	0.076	0.134	0.047	0.073		0.176	0.052	0.095	0.136
	0.073	0.035	0.106	0.159		0.236	0.142	0.154	0.187
	0.1	0.219	0.025	0.062		0.119	0.034	0.155	0.038
	0.143	0.029	0.14	0.132		0.218	0.02	0.106	0.23
	0.125	0.063	0.053	0.044		0.182	0.197	0.025	0.195
	0.061	0.028	0.069	0.288		0.292	0.043	0.096	0.197
	0.057	0.077	0.081	0.141		0.146	0.104	0.053	0.074
	0.05	0.793	0.097	0.046		0.226	0.021	0.129	0.08
	0.148	0.059	0.022	0.117		0.291	0.026	0.43	0.106
	0.02	0.039	0.083	0.024		0.158	0.055	0.076	0.164
	0.072	0.086	0.103	0.144		0.127	0.133	0.376	0.245
	0.023	0.063	0.086	0.041		0.05	0.087	0.141	0.183
	0.068	0.021	0.091	0.136		0.062	0.195	0.157	0.203
	0.078	0.103	0.022	0.061		0.133	0.196	0.154	0.298
	0.058	0.059	0.173	0.084		0.089	0.059	0.116	0.191
	0.075	0.08	0.053	0.109		0.096	0.178	0.054	0.044
	0.084	0.114	0.087	0.099		0.059	0.304	0.024	0.175
	0.02	0.112	0.022	0.048		0.078	0.122	0.176	0.327
	0.505	0.021	0.098	0.064		0.116	0.049	0.064	0.305
	0.084	0.044	0.125	0.113		0.224	0.036	0.164	0.171
	0.044	0.031	0.038	0.077		0.035	0.317	0.036	0.212
	0.102	0.062	0.02	0.045		0.074	0.07	0.022	0.23
	0.071	0.043	0.068	0.125		0.172	0.054	0.138	0.233
	0.156	0.059	0.06	0.027		0.152	0.072	0.075	0.315
	0.204	0.185	0.062	0.077		0.021	0.259	0.033	0.033
	0.035	0.22	0.029	0.068		0.121	0.245	0.416	0.219
	0.141	0.025	0.099	0.068		0.124	0.094	0.02	0.242
	0.056	0.052	0.023	0.06		0.048	0.114	0.136	0.224
	0.057	0.076	0.073	0.025		0.08	0.162	0.108	0.113
	0.035	0.119	0.048	0.126		0.024	0.186	0.284	0.031
	0.102	0.044	0.128	0.05		0.168	0.085	0.183	0.215
	0.03	0.12	0.035	0.1		0.144	0.293	0.1	0.159
	0.262	0.037	0.11	0.057		0.038	0.065	0.034	0.217
	0.077	0.102	0.108	0.068		0.225	0.123	0.265	0.128
	0.054	0.096	0.129	0.089		0.08	0.107	0.117	0.023
	0.045	0.276	0.067	0.097		0.037	0.106	0.095	0.089
	0.046	0.053	0.07	0.162		0.188	0.151	0.162	0.043
	0.108	0.049	0.108	0.033		0.139	0.13	0.286	0.044
	0.024	0.134	0.039	0.035		0.252	0.121	0.349	0.17
	0.081	0.061	0.083	0.027		0.112	0.146	0.134	0.423
	0.084	0.088	0.03	0.048		0.067	0.089	0.174	0.235
	0.049	0.095	0.112	0.02		0.174	0.354	0.129	0.133
	0.032	0.144	0.079	0.023		0.352	0.061	0.054	0.085
	0.031	0.066	0.038	0.071		0.053	0.026	0.317	0.053
	0.065	0.02	0.042	0.152		0.057	0.131	0.153	0.084
	0.057	0.064	0.092	0.089		0.225	0.022	0.062	0.251
	0.082	0.076	0.043	0.057		0.169	0.165	0.255	0.186
	0.133	0.028	0.05	0.031		0.297	0.045	0.206	0.072
	0.101	0.161	0.056	0.215		0.308	0.034	0.038	0.192
	0.048	0.034	0.057	0.078		0.068	0.08	0.054	0.22
	0.148	0.094	0.079	0.181		0.056	0.031	0.038	0.154
	0.086	0.128	0.141	0.171		0.078	0.069	0.062	0.177
	0.058	0.161	0.08	0.166		0.231	0.215	0.064	0.127
	0.109	0.068	0.068	0.124		0.171	0.163	0.078	0.342
	0.027	0.068	0.125	0.101		0.041	0.03	0.027	0.157
	0.241	0.083	0.094	0.031		0.057	0.057	0.037	0.044
	0.046	0.044	0.086	0.041		0.029	0.128	0.064	0.605
	0.029	0.247	0.057	0.059		0.106	0.077	0.034	0.305
	0.055	0.072	0.027	0.07		0.123	0.141	0.107	0.154
	0.067	0.106	0.105	0.08		0.169	0.063	0.225	0.108
	0.091	0.045	0.061	0.122		0.022	0.079	0.023	0.223
	0.281	0.097	0.056	0.164		0.109	0.043	0.095	0.089
	0.038	0.024	0.058	0.086		0.033	0.068	0.075	0.317
	0.084	0.141	0.109	0.161		0.206	0.199	0.131	0.166
	0.103	0.065	0.157	0.027		0.205	0.116	0.058	0.188
	0.022	0.038	0.023	0.057		0.092	0.232	0.074	0.043
	0.062	0.251	0.046	0.079		0.077	0.062	0.043	0.093
	0.023	0.096	0.093	0.092		0.284	0.056	0.141	0.099
	0.193	0.026	0.183	0.186		0.044	0.022	0.154	0.156
	0.058	0.319	0.102	0.102		0.263	0.057	0.133	0.034
	0.035	0.086	0.034	0.095		0.043	0.19	0.109	0.116
	0.025	0.116	0.108	0.061		0.142	0.041	0.137	0.034
	0.025	0.092	0.068	0.331		0.038	0.078	0.102	0.161
	0.091	0.022	0.045	0.067		0.214	0.102	0.102	0.103
	0.034	0.112	0.031	0.115		0.131	0.057	0.145	0.29
	0.038	0.045	0.035	0.116		0.15	0.17	0.183	0.042
	0.03	0.166	0.061	0.076		0.148	0.154	0.198	0.085
	0.11	0.234	0.071	0.102		0.052	0.468	0.123	0.127
	0.027	0.071	0.06	0.046		0.142	0.121	0.102	0.172
	0.095	0.024	0.035	0.1		0.239	0.132	0.056	0.171
	0.079	0.038	0.07	0.109		0.146	0.114	0.133	0.106
	0.022	0.071	0.04	0.126		0.07	0.073	0.103	0.223
	0.044	0.063	0.087	0.15		0.178	0.504	0.236	0.101
	0.06	0.062	0.106	0.052		0.128	0.056	0.261	0.25
	0.086	0.12	0.103	0.277		0.147	0.037	0.249	0.079
	0.05	0.035	0.047	0.117		0.11	0.058	0.116	0.079
	0.163	0.6	0.102	0.085		0.061	0.194	0.064	0.094
	0.077	0.066	0.213	0.088		0.084	0.2	0.171	0.119
	0.074	0.09	0.092	0.04		0.297	0.042	0.126	0.179
	0.125	0.097	0.266	0.088		0.075	0.184	0.155	0.358
	0.032	0.201	0.049	0.116		0.078	0.025	0.027	0.109
	0.08	0.118	0.112	0.024		0.182	0.153	0.067	0.036
	0.19	0.047	0.048	0.146		0.308	0.097	0.146	0.077
	0.052	0.054	0.081	0.093		0.082	0.074	0.14	0.169
	0.082	0.041	0.103	0.17		0.55	0.236	0.211	0.02
	0.04	0.039	0.197	0.14		0.111	0.086	0.08	0.112
	0.03	0.022	0.117	0.085		0.113	0.022	0.148	0.169
	0.093	0.047	0.032	0.079		0.068	0.151	0.114	0.191
	0.022	0.176	0.064	0.073		0.109	0.057	0.05	0.048
	0.024	0.132	0.097	0.029		0.039	0.095	0.13	0.082
	0.047	0.168	0.037	0.075		0.154	0.028	0.277	0.148
	0.064	0.147	0.095	0.054		0.149	0.369	0.143	0.177
	0.067	0.028	0.084	0.09		0.069	0.065	0.076	0.189
	0.023	0.098	0.075	0.079		0.119	0.256	0.106	0.032
	0.576	0.115	0.034	0.085		0.141	0.066	0.111	0.192
	0.038	0.082	0.046	0.09		0.223	0.075	0.177	0.288
	0.058	0.112	0.089	0.021		0.161	0.049	0.145	0.086
	0.036	0.135	0.111	0.079		0.322	0.17	0.198	0.161
	0.039	0.025	0.06	0.101		0.196	0.081	0.032	0.192
	0.047	0.056	0.093	0.094		0.493	0.046	0.15	0.063
	0.093	0.025	0.034	0.112		0.042	0.068	0.193	0.063
	0.116	0.22	0.063	0.052		0.182	0.079	0.131	0.178
	0.04	0.125	0.054	0.121		0.307	0.02	0.2	0.07
	0.023	0.191	0.029	0.031		0.248	0.156	0.165	0.155
	0.037	0.065	0.074	0.047		0.098	0.212	0.177	0.231
	0.057	0.055	0.035	0.063		0.084	0.101	0.021	0.188
	0.042	0.04	0.076	0.083		0.057	0.043	0.182	0.206
	0.168	0.318	0.049	0.243		0.17	0.044	0.183	0.071
	0.032	0.045	0.034	0.143		0.111	0.18	0.184	0.17
	0.029	0.062	0.031	0.101		0.162	0.079	0.057	0.08
	0.175	0.126	0.203	0.035		0.095	0.088	0.072	0.329
	0.101	0.311	0.085	0.023		0.468	0.125	0.172	0.079
	0.091	0.066	0.099	0.035		0.063	0.077	0.072	0.058
	0.021	0.063	0.061	0.228		0.096	0.052	0.203	0.125
	0.06	0.056	0.166	0.046		0.232	0.224	0.21	0.29
	0.112	0.052	0.05	0.047		0.02	0.022	0.065	0.146
	0.081	0.038	0.044	0.038		0.126	0.047	0.066	0.106
	0.041	0.028	0.093	0.033		0.073	0.046	0.137	0.199
	0.153	0.155	0.111	0.144		0.113	0.079	0.061	0.147
	0.055	0.104	0.028	0.118		0.053	0.032	0.348	0.023
	0.038	0.114	0.036	0.075		0.15	0.179	0.073	0.29
	0.024	0.21	0.044	0.045		0.419	0.072	0.158	0.256
	0.102	0.133	0.034	0.077		0.064	0.064	0.106	0.144
	0.103	0.032	0.035	0.028		0.124	0.051	0.02	0.054
	0.088	0.17	0.081	0.079		0.118	0.106	0.086	0.102
	0.059	0.036	0.027	0.096		0.049	0.094	0.138	0.18
	0.045	0.218	0.099	0.088		0.072	0.121	0.07	0.165
	0.022	0.085	0.136	0.073		0.119	0.055	0.059	0.041
	0.023	0.022	0.032	0.148		0.211	0.291	0.167	0.091
	0.072	0.919	0.027	0.047		0.204	0.141	0.085	0.154
	0.122	0.087	0.038	0.063		0.166	0.1	0.216	0.079
	0.064	0.077	0.109	0.1		0.314	0.11	0.135	0.054
	0.258	0.028	0.169	0.164		0.026	0.032	0.215	0.207
	0.073	0.214	0.121	0.076		0.197	0.073	0.102	0.049
	0.021	0.086	0.073	0.075		0.179	0.034	0.204	0.146
	0.083	0.055	0.035	0.039		0.081	0.225	0.033	0.225
	0.045	0.098	0.141	0.096		0.11	0.034	0.047	0.227
	0.122	0.172	0.061	0.129		0.037	0.15	0.034	0.128
	0.078	0.085	0.071	0.1		0.315	0.092	0.044	0.24
	0.113	0.064	0.031	0.102		0.08	0.132	0.111	0.051
	0.058	0.193	0.086	0.058		0.183	0.199	0.025	0.153
	0.075	0.194	0.115	0.048		0.176	0.127	0.043	0.235
	0.021	0.076	0.088	0.056		0.176	0.054	0.061	0.18
	0.073	0.387	0.046	0.048		0.034	0.204	0.217	0.157
	0.034	0.081	0.177	0.028		0.106	0.337	0.17	0.276
	0.032	0.159	0.057	0.021		0.083	0.076	0.118	0.131
	0.095	0.114	0.059	0.059		0.063	0.058	0.234	0.213
	0.067	0.284	0.061	0.088		0.151	0.099	0.021	0.149
	0.051	0.063	0.148	0.059		0.414	0.328	0.173	0.152
	0.064	0.025	0.117	0.039		0.164	0.42	0.02	0.217
	0.177	0.25	0.027	0.079		0.032	0.167	0.137	0.133
	0.086	0.119	0.043	0.081		0.064	0.163	0.147	0.082
	0.032	0.1	0.031	0.153		0.199	0.03	0.178	0.125
	0.038	0.049	0.025	0.1		0.044	0.164	0.026	0.123
	0.092	0.142	0.085	0.082		0.049	0.061	0.163	0.163
	0.404	0.102	0.066	0.062		0.284	0.21	0.02	0.154
	0.151	0.055	0.09	0.056		0.133	0.154	0.187	0.188
	0.08	0.037	0.05	0.073		0.199	0.146	0.284	0.304
	0.125	0.048	0.033	0.108		0.068	0.084	0.206	0.304
	0.099	0.246	0.042	0.085		0.152	0.066	0.2	0.223
	0.098	0.055	0.045	0.166		0.024	0.216	0.17	0.183
	0.027	0.276	0.231	0.029		0.083	0.159	0.075	0.151
	0.056	0.026	0.06	0.02		0.022	0.025	0.034	0.336
	0.056	0.057	0.031	0.048		0.026	0.032	0.088	0.072
	0.031	0.057	0.039	0.071		0.204	0.093	0.192	0.12
	0.048	0.051	0.023	0.037		0.11	0.149	0.293	0.037
	0.044	0.061	0.077	0.144		0.09	0.15	0.057	0.188
	0.083	0.024	0.081	0.06		0.043	0.169	0.176	0.225
	0.089	0.039	0.097	0.134		0.193	0.114	0.041	0.127
	0.116	0.125	0.039	0.094		0.056	0.211	0.064	0.201
	0.079	0.124	0.093	0.112		0.13	0.088	0.268	0.119
	0.044	0.075	0.034	0.204		0.147	0.224	0.095	0.409
	0.059	0.029	0.027	0.167		0.052	0.079	0.051	0.202
	0.063	0.343	0.103	0.043		0.119	0.111	0.065	0.119
	0.088	0.239	0.057	0.031		0.239	0.021	0.096	0.145
	0.028	0.095	0.091	0.153		0.17	0.072	0.147	0.146
	0.035	0.118	0.096	0.062		0.062	0.049	0.291	0.04
	0.034	0.02	0.077	0.131		0.102	0.03	0.148	0.198
	0.028	0.248	0.079	0.034		0.08	0.364	0.057	0.033
	0.065	0.176	0.048	0.042		0.241	0.063	0.062	0.036
	0.063	0.05	0.062	0.193		0.237	0.033	0.123	0.222
	0.046	0.056	0.068	0.023		0.179	0.077	0.147	0.282
	0.036	0.057	0.103	0.047		0.047	0.08	0.148	0.335
	0.023	0.211	0.055	0.031		0.089	0.064	0.11	0.154
	0.075	0.04	0.145	0.037		0.039	0.082	0.307	0.168
	0.06	0.041	0.024	0.049		0.213	0.194	0.223	0.13
	0.131	0.023	0.145	0.095		0.294	0.092	0.142	0.244
	0.038	0.091	0.325	0.096		0.036	0.05	0.089	0.155
	0.356	0.057	0.116	0.038		0.128	0.084	0.136	0.116
	0.083	0.107	0.034	0.061		0.339	0.162	0.1	0.202
	0.026	0.021	0.026	0.115		0.32	0.252	0.077	0.099
	0.093	0.213	0.041	0.05		0.031	0.097	0.133	0.22
	0.034	0.189	0.087	0.127		0.197	0.053	0.06	0.252
	0.047	0.054	0.075	0.047		0.036	0.2	0.131	0.061
	0.092	0.054	0.037	0.075		0.112	0.272	0.046	0.195
	0.114	0.055	0.124	0.139		0.121	0.116	0.082	0.164
	0.076	0.105	0.136	0.109		0.111	0.188	0.195	0.113
	0.034	0.212	0.039	0.037		0.058	0.072	0.175	0.115
	0.053	0.261	0.041	0.125		0.028	0.262	0.141	0.129
	0.071	0.065	0.199	0.168		0.027	0.041	0.165	0.395
	0.051	0.038	0.045	0.164		0.142	0.148	0.118	0.103
	0.232	0.109	0.025	0.023		0.083	0.132	0.236	0.166
	0.081	0.083	0.086	0.058		0.025	0.109	0.199	0.156
	0.085	0.026	0.101	0.053		0.179	0.192	0.107	0.114
	0.19	0.151	0.115	0.076		0.299	0.143	0.052	0.119
	0.022	0.326	0.092	0.058		0.09	0.131	0.158	0.129
	0.065	0.036	0.037	0.135		0.067	0.298	0.142	0.206
	0.054	0.056	0.053	0.089		0.072	0.251	0.044	0.261
	0.043	0.068	0.065	0.136		0.022	0.112	0.034	0.194
	0.051	0.051	0.025	0.19		0.062	0.261	0.172	0.119
	0.054	0.077	0.037	0.047		0.137	0.031	0.148	0.149
	0.157	0.096	0.022	0.092		0.09	0.155	0.277	0.063
	0.137	0.124	0.036	0.089		0.234	0.051	0.102	0.02
	0.115	0.023	0.182	0.162		0.123	0.04	0.25	0.303
	0.043	0.077	0.053	0.066		0.079	0.119	0.184	0.182
	0.055	0.158	0.213	0.101		0.382	0.14	0.197	0.23
	0.131	0.283	0.023	0.249		0.078	0.077	0.198	0.181
	0.073	0.047	0.055	0.239		0.191	0.148	0.167	0.211
	0.102	0.058	0.142	0.076		0.052	0.023	0.097	0.385
	0.119	0.02	0.106	0.082		0.056	0.022	0.022	0.165
	0.057	0.032	0.027	0.11		0.229	0.049	0.196	0.332
	0.031	0.138	0.078	0.037		0.473	0.195	0.209	0.163
	0.024	0.068	0.035	0.025		0.04	0.042	0.027	0.173
	0.098	0.036	0.05	0.048		0.069	0.113	0.028	0.253
	0.036	0.142	0.103	0.027		0.139	0.072	0.286	0.086
	0.129	0.104	0.078	0.043		0.024	0.024	0.074	0.127
	0.157	0.058	0.041	0.083		0.049	0.247	0.032	0.034
	0.026	0.137	0.064	0.09		0.037	0.031	0.086	0.193
	0.302	0.081	0.02	0.078		0.021	0.25	0.122	0.217
	0.052	0.027	0.036	0.034		0.031	0.2	0.183	0.14
	0.082	0.047	0.086	0.065		0.103	0.169	0.156	0.152
	0.316	0.069	0.088	0.122		0.131	0.08	0.142	0.14
	0.275	0.109	0.108	0.173		0.16	0.088	0.194	0.333
	0.061	0.08	0.057	0.023		0.16	0.046	0.247	0.29
	0.039	0.13	0.039	0.065		0.141	0.056	0.024	0.172
	0.082	0.125	0.023	0.164		0.099	0.064	0.025	0.1
	0.05	0.044	0.057	0.038		0.17	0.205	0.028	0.21
	0.068	0.041	0.073	0.099		0.288	0.226	0.049	0.091
	0.071	0.101	0.035	0.101		0.044	0.053	0.108	0.138
	0.102	0.077	0.089	0.113		0.163	0.183	0.072	0.027
	0.193	0.049	0.055	0.04		0.139	0.161	0.107	0.123
	0.043	0.041	0.095	0.144		0.031	0.118	0.061	0.105
	0.245	0.067	0.064	0.042		0.154	0.164	0.096	0.205
	0.085	0.377	0.059	0.04		0.208	0.148	0.038	0.144
	0.165	0.087	0.038	0.098		0.193	0.221	0.18	0.046
	0.073	0.135	0.104	0.11		0.214	0.149	0.224	0.117
	0.065	0.074	0.079	0.098		0.252	0.207	0.03	0.131
	0.122	0.034	0.036	0.02		0.142	0.053	0.199	0.213
	0.067	0.122	0.083	0.047		0.22	0.029	0.287	0.171
	0.059	0.035	0.153	0.127		0.165	0.059	0.1	0.039
	0.056	0.023	0.128	0.09		0.133	0.256	0.136	0.023
	0.175	0.13	0.066	0.09		0.115	0.172	0.076	0.125
	0.055	0.145	0.02	0.079		0.145	0.128	0.079	0.222
	0.043	0.048	0.067	0.049		0.029	0.117	0.029	0.203
	0.097	0.059	0.036	0.108		0.103	0.382	0.244	0.196
	0.232	0.052	0.07	0.145		0.022	0.14	0.273	0.161
	0.043	0.133	0.169	0.059		0.03	0.197	0.149	0.047
	0.093	0.032	0.031	0.049		0.176	0.202	0.172	0.159
	0.07	0.058	0.056	0.077		0.16	0.076	0.076	0.182
	0.07	0.035	0.17	0.066		0.069	0.093	0.045	0.156
	0.053	0.068	0.125	0.093		0.03	0.091	0.057	0.184
	0.079	0.13	0.049	0.116		0.239	0.101	0.106	0.068
	0.142	0.089	0.03	0.062		0.041	0.246	0.244	0.066
	0.074	0.088	0.096	0.034		0.034	0.127	0.143	0.143
	0.059	0.051	0.032	0.037		0.108	0.128	0.138	0.172
	0.047	0.134	0.063	0.061		0.32	0.156	0.187	0.13
	0.078	0.052	0.171	0.037		0.176	0.171	0.144	0.106
	0.138	0.062	0.034	0.096		0.026	0.073	0.097	0.367
	0.104	0.18	0.146	0.123		0.029	0.046	0.116	0.043
	0.058	0.083	0.093	0.13		0.046	0.171	0.091	0.038
	0.058	0.064	0.028	0.121		0.077	0.083	0.044	0.148
	0.068	0.154	0.051	0.055		0.02	0.071	0.212	0.173
	0.037	0.065	0.096	0.137		0.03	0.115	0.178	0.137
	0.095	0.027	0.117	0.059		0.049	0.106	0.08	0.149
	0.064	0.046	0.086	0.028		0.035	0.193	0.036	0.17
	0.111	0.188	0.042	0.079		0.115	0.225	0.203	0.024
	0.026	0.038	0.065	0.079		0.119	0.122	0.023	0.354
	0.071	0.034	0.02	0.187		0.294	0.08	0.161	0.16
	0.026	0.099	0.048	0.126		0.297	0.187	0.278	0.091
	0.133	0.138	0.069	0.046		0.079	0.17	0.189	0.295
	0.076	0.076	0.02	0.028		0.057	0.131	0.188	0.191
	0.083	0.154	0.079	0.053		0.128	0.131	0.021	0.039
	0.152	0.129	0.083	0.108		0.044	0.092	0.227	0.152
	0.048	0.193	0.05	0.042		0.032	0.13	0.052	0.165
	0.097	0.05	0.02	0.139		0.034	0.041	0.094	0.192
	0.125	0.02	0.031	0.062		0.086	0.081	0.054	0.09
	0.167	0.056	0.083	0.178		0.107	0.168	0.174	0.037
	0.079	0.03	0.096	0.031		0.057	0.045	0.135	0.272
	0.032	0.259	0.043	0.101		0.228	0.103	0.104	0.143
	0.087	0.139	0.172	0.093		0.235	0.114	0.116	0.265
	0.063	0.082	0.035	0.074		0.182	0.25	0.084	0.298
	0.247	0.03	0.04	0.061		0.326	0.021	0.096	0.276
	0.209	0.113	0.129	0.077		0.066	0.041	0.311	0.155
	0.078	0.045	0.057	0.206		0.17	0.133	0.061	0.109
	0.046	0.044	0.022	0.025		0.123	0.06	0.166	0.17
	0.021	0.139	0.057	0.044		0.069	0.04	0.124	0.216
	0.092	0.124	0.034	0.067		0.158	0.025	0.109	0.179
	0.124	0.222	0.075	0.072		0.055	0.03	0.391	0.124
	0.071	0.062	0.023	0.082		0.253	0.063	0.179	0.1
	0.053	0.046	0.046	0.139		0.034	0.222	0.152	0.12
	0.167	0.084	0.088	0.147		0.131	0.23	0.266	0.188
	0.136	0.04	0.057	0.037		0.13	0.099	0.095	0.041
	0.169	0.084	0.046	0.08		0.03	0.096	0.02	0.034
	0.158	0.189	0.107	0.057		0.281	0.193	0.119	0.104
	0.263	0.391	0.078	0.074		0.05	0.028	0.2	0.128
	0.041	0.035	0.158	0.034		0.173	0.14	0.134	0.053
	0.024	0.136	0.084	0.07		0.085	0.057	0.088	0.046
	0.03	0.028	0.048	0.057		0.321	0.166	0.121	0.244
	0.098	0.071	0.181	0.05		0.089	0.061	0.054	0.181
	0.044	0.185	0.057	0.102		0.074	0.227	0.399	0.264
	0.029	0.023	0.043	0.07		0.03	0.107	0.132	0.041
	0.048	0.102	0.141	0.086		0.19	0.195	0.175	0.189
	0.11	0.034	0.024	0.208		0.111	0.056	0.178	0.02
	0.047	0.106	0.093	0.107		0.067	0.203	0.192	0.216
	0.156	0.095	0.025	0.161		0.241	0.082	0.188	0.178
	0.055	0.201	0.076	0.147		0.046	0.167	0.046	0.184
	0.026	0.022	0.09	0.06		0.169	0.183	0.191	0.155
	0.045	0.227	0.113	0.075		0.045	0.148	0.225	0.07
	0.02	0.107	0.066	0.117		0.182	0.027	0.094	0.123
	0.06	0.05	0.037	0.065		0.08	0.022	0.025	0.328
	0.021	0.043	0.042	0.031		0.164	0.089	0.146	0.152
	0.11	0.058	0.09	0.033		0.17	0.084	0.13	0.107
	0.026	0.057	0.074	0.197		0.169	0.221	0.036	0.13
	0.022	0.028	0.028	0.034		0.134	0.091	0.176	0.179
	0.24	0.024	0.115	0.072		0.103	0.296	0.173	0.031
	0.107	0.028	0.269	0.08		0.057	0.103	0.237	0.221
	0.126	0.066	0.083	0.069		0.079	0.033	0.045	0.301
	0.141	0.098	0.054	0.125		0.033	0.162	0.069	0.049
	0.092	0.04	0.062	0.049		0.033	0.3	0.172	0.214
	0.182	0.147	0.075	0.132		0.075	0.032	0.045	0.122
	0.275	0.278	0.061	0.071		0.041	0.09	0.228	0.193
	0.021	0.086	0.031	0.057		0.103	0.061	0.092	0.242
	0.041	0.054	0.038	0.125		0.251	0.069	0.105	0.089
	0.025	0.098	0.104	0.083		0.164	0.073	0.109	0.055
	0.042	0.093	0.063	0.031		0.051	0.101	0.193	0.211
	0.091	0.124	0.09	0.158		0.206	0.04	0.177	0.211
	0.057	0.063	0.061	0.153		0.137	0.109	0.146	0.174
	0.119	0.024	0.079	0.081		0.192	0.053	0.339	0.304
	0.107	0.162	0.043	0.072		0.072	0.077	0.115	0.058
	0.02	0.026	0.024	0.074		0.112	0.036	0.027	0.107
	0.098	0.079	0.119	0.02		0.173	0.054	0.141	0.104
	0.092	0.097	0.085	0.143		0.298	0.027	0.107	0.179
	0.326	0.023	0.037	0.069		0.07	0.03	0.158	0.157
	0.069	0.028	0.086	0.088		0.034	0.03	0.077	0.458
	0.123	0.028	0.058	0.121		0.054	0.044	0.05	0.077
	0.027	0.022	0.066	0.166		0.15	0.074	0.134	0.064
	0.041	0.036	0.025	0.024		0.027	0.061	0.109	0.269
	0.048	0.06	0.043	0.171		0.238	0.052	0.181	0.216
	0.104	0.077	0.041	0.02		0.034	0.042	0.102	0.247
	0.043	0.078	0.074	0.137		0.179	0.08	0.067	0.145
	0.031	0.035	0.086	0.038		0.122	0.025	0.026	0.2
	0.261	0.045	0.113	0.138		0.072	0.129	0.112	0.021
	0.102	0.041	0.087	0.104		0.079	0.09	0.147	0.18
	0.09	0.072	0.099	0.056		0.116	0.021	0.092	0.026
	0.04	0.055	0.104	0.04		0.152	0.162	0.062	0.146
	0.065	0.02	0.023	0.14		0.167	0.222	0.084	0.15
	0.075	0.065	0.022	0.028		0.025	0.307	0.24	0.258
	0.066	0.059	0.111	0.119		0.25	0.137	0.17	0.232
	0.358	0.035	0.035	0.05		0.534	0.028	0.167	0.273
	0.043	0.033	0.122	0.117		0.049	0.022	0.049	0.102
	0.072	0.046	0.109	0.044		0.114	0.237	0.247	0.044
	0.045	0.055	0.032	0.056		0.026	0.041	0.134	0.109
	0.032	0.064	0.108	0.097		0.04	0.065	0.166	0.163
	0.079	0.044	0.128	0.025		0.032	0.04	0.037	0.164
	0.039	0.097	0.11	0.141		0.057	0.076	0.089	0.194
	0.144	0.067	0.056	0.085		0.052	0.032	0.277	0.128
	0.039	0.02	0.13	0.347		0.393	0.099	0.031	0.225
	0.418	0.052	0.816	0.063		0.143	0.053	0.06	0.314
	0.028	0.08	0.126	0.061		0.035	0.045	0.045	0.244
	0.515	0.103	0.101	0.056		0.255	0.183	0.02	0.144
	0.045	0.044	0.062	0.068		0.371	0.331	0.139	0.055
	0.078	0.083	0.09	0.098		0.209	0.116	0.24	0.085
	0.114	0.14	0.047	0.038		0.144	0.227	0.199	0.123
	0.051	0.124	0.044	0.144		0.109	0.113	0.056	0.037
	0.04	0.055	0.058	0.169		0.021	0.113	0.081	0.141
	0.105	0.087	0.04	0.139		0.227	0.112	0.193	0.149
	0.031	0.084	0.096	0.119		0.167	0.202	0.063	0.237
	0.09	0.026	0.024	0.021		0.109	0.119	0.121	0.042
	0.057	0.02	0.036	0.047		0.031	0.087	0.055	0.314
	0.06	0.055	0.161	0.071		0.554	0.117	0.07	0.299
	0.028	0.064	0.031	0.143		0.091	0.232	0.166	0.465
	0.254	0.049	0.071	0.096		0.083	0.286	0.232	0.231
	0.064	0.129	0.071	0.027		0.048	0.104	0.051	0.183
	0.034	0.035	0.046	0.079		0.167	0.116	0.025	0.102
	0.047	0.098	0.084	0.092		0.2	0.1	0.144	0.119
	0.124	0.041	0.103	0.079		0.358	0.15	0.189	0.231
	0.026	0.051	0.084	0.086		0.258	0.024	0.085	0.171
	0.122	0.065	0.067	0.054		0.193	0.083	0.128	0.057
	0.224	0.046	0.051	0.094		0.068	0.223	0.061	0.232
	0.021	0.033	0.046	0.099		0.072	0.055	0.157	0.142
	0.069	0.042	0.167	0.06		0.131	0.32	0.315	0.402
	0.054	0.151	0.039	0.054		0.041	0.174	0.082	0.24
	0.045	0.028	0.037	0.116		0.048	0.237	0.21	0.543
	0.13	0.046	0.07	0.031		0.114	0.119	0.204	0.087
	0.064	0.054	0.119	0.109		0.087	0.084	0.026	0.109
	0.144	0.056	0.064	0.101		0.089	0.611	0.064	0.254
	0.036	0.032	0.053	0.092		0.077	0.025	0.021	0.18
	0.021	0.076	0.126	0.125		0.073	0.091	0.129	0.064
	0.023	0.087	0.049	0.07		0.029	0.123	0.207	0.197
	0.026	0.082	0.058	0.148		0.024	0.055	0.093	0.206
	0.035	0.182	0.08	0.129		0.049	0.102	0.189	0.05
	0.022	0.119	0.065	0.067		0.132	0.208	0.21	0.302
	0.098	0.034	0.061	0.052		0.028	0.058	0.213	0.191
	0.043	0.086	0.107	0.098		0.082	0.108	0.109	0.173
	0.056	0.048	0.063	0.179		0.164	0.117	0.111	0.064
	0.047	0.087	0.041	0.167		0.089	0.179	0.048	0.091
	0.044	0.045	0.088	0.071		0.049	0.066	0.175	0.133
	0.062	0.091	0.028	0.056		0.098	0.139	0.069	0.054
	0.066	0.188	0.034	0.111		0.046	0.255	0.039	0.134
	0.041	0.083	0.034	0.046		0.236	0.382	0.116	0.149
	0.067	0.083	0.063	0.06		0.136	0.091	0.442	0.045
	0.231	0.055	0.032	0.075		0.134	0.091	0.027	0.148
	0.05	0.079	0.069	0.09		0.194	0.046	0.02	0.193
	0.17	0.02	0.03	0.067		0.114	0.039	0.079	0.177
	0.13	0.21	0.077	0.168		0.161	0.178	0.022	0.203
	0.159	0.226	0.035	0.109		0.166	0.025	0.338	0.129
	0.122	0.134	0.029	0.02		0.091	0.143	0.122	0.202
	0.079	0.085	0.034	0.032		0.174	0.107	0.044	0.096
	0.096	0.1	0.046	0.084		0.039	0.032	0.048	0.186
	0.033	0.143	0.05	0.02		0.088	0.17	0.221	0.072
	0.277	0.041	0.134	0.058		0.026	0.196	0.178	0.171
	0.081	0.024	0.021	0.083		0.21	0.165	0.159	0.151
	0.03	0.188	0.047	0.025		0.084	0.079	0.194	0.224
	0.105	0.058	0.113	0.034		0.094	0.14	0.156	0.16
	0.057	0.287	0.098	0.078		0.036	0.148	0.184	0.3
	0.075	0.034	0.045	0.097		0.228	0.085	0.18	0.102
	0.483	0.057	0.057	0.133		0.056	0.353	0.072	0.169
	0.257	0.061	0.051	0.102		0.118	0.026	0.214	0.126
	0.221	0.048	0.082	0.102		0.125	0.099	0.103	0.074
	0.052	0.043	0.02	0.086		0.1	0.08	0.137	0.059
	0.047	0.071	0.101	0.109		0.138	0.189	0.149	0.265
	0.026	0.057	0.041	0.066		0.132	0.052	0.152	0.177
	0.122	0.061	0.053	0.077		0.194	0.1	0.232	0.22
	0.077	0.057	0.066	0.057		0.092	0.048	0.133	0.068
	0.151	0.102	0.02	0.079		0.124	0.139	0.143	0.077
	0.069	0.056	0.038	0.041		0.184	0.112	0.17	0.232
	0.157	0.121	0.146	0.093		0.295	0.046	0.261	0.085
	0.061	0.19	0.024	0.132		0.098	0.083	0.107	0.07
	0.063	0.02	0.041	0.083		0.112	0.293	0.143	0.173
	0.111	0.077	0.085	0.154		0.096	0.181	0.223	0.517
	0.332	0.024	0.043	0.176		0.057	0.133	0.069	0.031
	0.05	0.059	0.053	0.155		0.063	0.215	0.026	0.066
	0.1	0.071	0.05	0.12		0.151	0.079	0.148	0.227
	0.297	0.041	0.038	0.036		0.177	0.116	0.078	0.317
	0.081	0.119	0.034	0.114		0.105	0.15	0.047	0.271
	0.035	0.031	0.226	0.051		0.236	0.113	0.15	0.231
	0.095	0.066	0.029	0.046		0.104	0.102	0.112	0.175
	0.046	0.075	0.131	0.111		0.093	0.147	0.054	0.157
	0.184	0.052	0.03	0.032		0.426	0.057	0.119	0.128
	0.17	0.033	0.104	0.114		0.148	0.073	0.069	0.045
	0.049	0.021	0.039	0.117		0.059	0.217	0.178	0.148
	0.111	0.032	0.059	0.05		0.178	0.288	0.109	0.109
	0.052	0.092	0.022	0.129		0.031	0.026	0.3	0.034
	0.193	0.068	0.154	0.072		0.144	0.044	0.033	0.286
	0.034	0.058	0.115	0.086		0.066	0.12	0.148	0.093
	0.1	0.042	0.024	0.025		0.242	0.083	0.065	0.171
	0.072	0.116	0.163	0.113		0.221	0.021	0.154	0.137
	0.082	0.02	0.021	0.022		0.09	0.274	0.059	0.223
	0.1	0.146	0.057	0.037		0.071	0.318	0.193	0.091
	0.029	0.051	0.102	0.092		0.029	0.044	0.136	0.286
	0.021	0.022	0.081	0.206		0.046	0.371	0.156	0.037
	0.068	0.031	0.066	0.11		0.041	0.121	0.079	0.21
	0.04	0.021	0.217	0.184		0.058	0.093	0.106	0.153
	0.036	0.063	0.049	0.033		0.183	0.027	0.149	0.22
	0.056	0.067	0.103	0.032		0.227	0.188	0.184	0.168
	0.025	0.108	0.042	0.038		0.12	0.123	0.242	0.122
	0.062	0.056	0.05	0.057		0.159	0.041	0.055	0.243
	0.171	0.151	0.074	0.034		0.179	0.03	0.052	0.369
	0.025	0.054	0.092	0.03		0.086	0.094	0.276	0.317
	0.07	0.118	0.05	0.091		0.132	0.191	0.023	0.108
	0.07	0.044	0.13	0.069		0.037	0.194	0.172	0.078
	0.048	0.054	0.138	0.099		0.123	0.158	0.302	0.034
	0.113	0.07	0.03	0.058		0.057	0.12	0.185	0.121
	0.039	0.076	0.064	0.121		0.17	0.046	0.111	0.223
	0.121	0.067	0.099	0.098		0.165	0.144	0.059	0.202
	0.057	0.03	0.079	0.253		0.026	0.082	0.063	0.033
	0.087	0.076	0.102	0.115		0.268	0.194	0.072	0.124
	0.202	0.022	0.046	0.065		0.078	0.039	0.047	0.023
	0.022	0.042	0.038	0.056		0.051	0.039	0.159	0.02
	0.23	0.037	0.102	0.072		0.101	0.046	0.183	0.034
	0.148	0.036	0.034	0.036		0.068	0.028	0.041	0.126
	0.125	0.041	0.022	0.066		0.184	0.102	0.04	0.079
	0.134	0.079	0.034	0.09		0.108	0.186	0.057	0.124
	0.085	0.094	0.024	0.031		0.053	0.201	0.045	0.048
	0.041	0.02	0.033	0.041		0.066	0.049	0.02	0.304
	0.05	0.024	0.051	0.071		0.038	0.058	0.069	0.057
	0.349	0.248	0.139	0.024		0.266	0.109	0.164	0.141
	0.152	0.104	0.102	0.069		0.035	0.148	0.08	0.253
	0.137	0.097	0.168	0.062		0.187	0.097	0.115	0.16
	0.039	0.028	0.048	0.102		0.034	0.129	0.034	0.128
	0.055	0.078	0.027	0.102		0.078	0.125	0.134	0.28
	0.075	0.087	0.063	0.115		0.091	0.19	0.161	0.156
	0.038	0.024	0.105	0.089		0.107	0.18	0.034	0.348
	0.074	0.054	0.033	0.027		0.033	0.135	0.153	0.127
	0.058	0.029	0.102	0.144		0.093	0.157	0.022	0.129
	0.079	0.126	0.064	0.159		0.275	0.126	0.076	0.215
	0.122	0.039	0.198	0.078		0.072	0.107	0.24	0.189
	0.118	0.113	0.031	0.099		0.147	0.104	0.076	0.164
	0.036	0.052	0.15	0.036		0.075	0.052	0.106	0.161
	0.072	0.147	0.095	0.05		0.066	0.1	0.129	0.186
	0.044	0.037	0.171	0.084		0.03	0.235	0.026	0.134
	0.02	0.059	0.106	0.104		0.133	0.097	0.171	0.181
	0.074	0.046	0.11	0.067		0.182	0.145	0.049	0.412
	0.044	0.053	0.079	0.106		0.052	0.196	0.483	0.088
	0.035	0.026	0.088	0.026		0.031	0.111	0.111	0.111
	0.171	0.11	0.09	0.121		0.33	0.034	0.03	0.072
	0.068	0.028	0.033	0.034		0.186	0.623	0.034	0.175
	0.083	0.041	0.077	0.049		0.112	0.148	0.172	0.167
	0.084	0.069	0.037	0.106		0.07	0.181	0.059	0.192
	0.217	0.064	0.16	0.066		0.117	0.223	0.108	0.088
	0.065	0.101	0.127	0.091		0.119	0.125	0.219	0.135
	0.034	0.034	0.06	0.112		0.058	0.227	0.056	0.159
	0.04	0.096	0.1	0.093		0.119	0.174	0.031	0.14
	0.086	0.073	0.032	0.075		0.025	0.234	0.145	0.123
	0.049	0.078	0.18	0.068		0.135	0.136	0.02	0.052
	0.065	0.159	0.093	0.054		0.316	0.203	0.074	0.146
	0.055	0.021	0.038	0.265		0.141	0.15	0.579	0.144
	0.048	0.1	0.03	0.062		0.091	0.061	0.152	0.236
	0.141	0.049	0.103	0.027		0.102	0.229	0.131	0.252
	0.332	0.037	0.03	0.093		0.275	0.027	0.18	0.039
	0.095	0.043	0.11	0.091		0.099	0.129	0.058	0.126
	0.111	0.065	0.103	0.258		0.36	0.031	0.054	0.204
	0.034	0.05	0.031	0.035		0.055	0.032	0.154	0.226
	0.028	0.026	0.058	0.085		0.314	0.269	0.097	0.044
	0.025	0.095	0.089	0.039		0.057	0.056	0.153	0.171
	0.043	0.034	0.24	0.063		0.126	0.089	0.084	0.07
	0.079	0.038	0.036	0.107		0.173	0.054	0.048	0.065
	0.039	0.049	0.147	0.021		0.04	0.141	0.319	0.086
	0.038	0.096	0.083	0.081		0.113	0.172	0.102	0.22
	0.121	0.086	0.097	0.064		0.046	0.123	0.029	0.241
	0.074	0.02	0.055	0.133		0.143	0.061	0.266	0.149
	0.116	0.022	0.05	0.153		0.123	0.077	0.171	0.044
	0.139	0.071	0.05	0.035		0.045	0.356	0.12	0.165
	0.038	0.029	0.07	0.079		0.201	0.041	0.07	0.145
	0.049	0.055	0.137	0.094		0.046	0.193	0.11	0.181
	0.054	0.066	0.02	0.087		0.187	0.097	0.169	0.252
	0.069	0.129	0.02	0.083		0.27	0.057	0.061	0.238
	0.027	0.073	0.075	0.045		0.122	0.341	0.14	0.149
	0.105	0.041	0.026	0.051		0.142	0.044	0.144	0.22
	0.182	0.091	0.077	0.035		0.077	0.154	0.039	0.222
	0.111	0.033	0.044	0.063		0.119	0.238	0.169	0.204
	0.028	0.04	0.039	0.161		0.098	0.141	0.049	0.098
	0.035	0.136	0.026	0.03		0.027	0.069	0.136	0.121
	0.023	0.076	0.102	0.173		0.066	0.329	0.041	0.307
	0.04	0.034	0.037	0.049		0.126	0.113	0.033	0.208
	0.181	0.044	0.078	0.094		0.131	0.079	0.094	0.201
	0.074	0.15	0.065	0.025		0.098	0.191	0.297	0.346
	0.035	0.032	0.083	0.085		0.131	0.069	0.061	0.275
	0.026	0.051	0.037	0.064		0.102	0.034	0.135	0.208
	0.034	0.043	0.025	0.122		0.03	0.021	0.161	0.179
	0.064	0.064	0.087	0.057		0.448	0.091	0.061	0.182
	0.102	0.048	0.047	0.116		0.03	0.152	0.062	0.217
	0.079	0.021	0.07	0.11		0.342	0.113	0.065	0.143
	0.026	0.024	0.063	0.06		0.149	0.109	0.024	0.189
	0.059	0.087	0.068	0.055		0.182	0.027	0.052	0.408
	0.068	0.032	0.042	0.106		0.135	0.194	0.123	0.376
	0.048	0.068	0.04	0.102		0.12	0.054	0.135	0.198
	0.226	0.034	0.096	0.038		0.437	0.17	0.149	0.26
	0.117	0.02	0.037	0.04		0.332	0.064	0.126	0.12
	0.031	0.34	0.061	0.081		0.429	0.055	0.103	0.095
	0.286	0.045	0.058	0.095		0.102	0.175	0.135	0.132
	0.078	0.043	0.058	0.02		0.079	0.186	0.086	0.219
	0.082	0.034	0.066	0.039		0.132	0.034	0.133	0.022
	0.133	0.029	0.087	0.101		0.099	0.126	0.029	0.184
	0.119	0.031	0.033	0.14		0.159	0.071	0.022	0.154
	0.036	0.034	0.037	0.126		0.082	0.075	0.181	0.437
	0.047	0.058	0.025	0.034		0.096	0.469	0.056	0.063
	0.068	0.045	0.022	0.082		0.321	0.025	0.087	0.289
	0.106	0.064	0.114	0.074		0.065	0.143	0.124	0.131
	0.053	0.021	0.02	0.141		0.131	0.095	0.037	0.104
	0.044	0.041	0.127	0.064		0.109	0.163	0.11	0.124
	0.095	0.093	0.023	0.036		0.023	0.15	0.308	0.158
	0.125	0.062	0.045	0.066		0.204	0.053	0.148	0.125
	0.055	0.092	0.056	0.074		0.023	0.154	0.051	0.193
	0.036	0.158	0.032	0.196		0.184	0.147	0.203	0.143
	0.388	0.106	0.07	0.075		0.08	0.312	0.138	0.18
	0.107	0.029	0.064	0.081		0.433	0.159	0.175	0.443
	0.158	0.098	0.025	0.154		0.151	0.132	0.165	0.237
	0.057	0.089	0.023	0.045		0.314	0.066	0.189	0.125
	0.128	0.028	0.041	0.087		0.057	0.044	0.161	0.061
	0.052	0.046	0.096	0.024		0.032	0.052	0.135	0.153
	0.08	0.17	0.123	0.173		0.612	0.048	0.094	0.236
	0.123	0.077	0.029	0.057		0.043	0.13	0.021	0.054
	0.04	0.123	0.064	0.211		0.171	0.047	0.035	0.131
	0.116	0.034	0.056	0.076		0.062	0.031	0.038	0.047
	0.151	0.08	0.103	0.094		0.065	0.061	0.151	0.155
	0.138	0.095	0.062	0.047		0.081	0.18	0.253	0.13
	0.171	0.058	0.03	0.057		0.264	0.313	0.091	0.032
	0.023	0.102	0.03	0.102		0.228	0.102	0.119	0.129
	0.139	0.077	0.101	0.122		0.182	0.149	0.039	0.182
	0.129	0.059	0.081	0.088		0.055	0.109	0.141	0.141
	0.031	0.043	0.022	0.083		0.165	0.168	0.077	0.214
	0.243	0.06	0.093	0.113		0.151	0.105	0.14	0.093
	0.068	0.145	0.02	0.169		0.247	0.132	0.021	0.192
	0.026	0.033	0.035	0.069		0.022	0.16	0.141	0.13
	0.1	0.041	0.215	0.033		0.14	0.134	0.302	0.041
	0.211	0.099	0.1	0.095		0.136	0.033	0.248	0.115
	0.04	0.166	0.051	0.117		0.411	0.029	0.121	0.081
	0.143	0.068	0.054	0.058		0.11	0.06	0.055	0.202
	0.162	0.05	0.09	0.101		0.383	0.131	0.047	0.052
	0.074	0.054	0.102	0.033		0.111	0.151	0.03	0.295
	0.05	0.04	0.082	0.129		0.035	0.086	0.02	0.254
	0.137	0.085	0.078	0.04		0.342	0.195	0.237	0.192
	0.043	0.11	0.028	0.044		0.216	0.042	0.043	0.15
	0.068	0.079	0.074	0.133		0.225	0.056	0.105	0.219
	0.131	0.097	0.034	0.021		0.18	0.162	0.029	0.25
	0.123	0.022	0.058	0.177		0.303	0.042	0.175	0.257
	0.03	0.036	0.053	0.163		0.044	0.036	0.193	0.056
	0.051	0.074	0.045	0.072		0.194	0.176	0.193	0.175
	0.113	0.078	0.093	0.116		0.026	0.187	0.029	0.242
	0.07	0.03	0.044	0.026		0.134	0.025	0.209	0.212
	0.023	0.052	0.021	0.105		0.11	0.216	0.109	0.188
	0.134	0.048	0.059	0.091		0.186	0.132	0.079	0.139
	0.065	0.038	0.035	0.14		0.307	0.1	0.171	0.42
	0.065	0.072	0.033	0.056		0.188	0.052	0.194	0.074
	0.028	0.103	0.02	0.081		0.05	0.159	0.139	0.162
	0.068	0.055	0.039	0.057		0.145	0.308	0.156	0.085
	0.1	0.067	0.047	0.077		0.081	0.204	0.134	0.32
	0.11	0.053	0.054	0.096		0.036	0.228	0.108	0.158
	0.115	0.085	0.042	0.199		0.078	0.15	0.194	0.354
	0.026	0.031	0.052	0.059		0.053	0.049	0.058	0.158
	0.103	0.057	0.024	0.086		0.169	0.034	0.021	0.218
	0.067	0.022	0.021	0.025		0.041	0.273	0.076	0.232
	0.122	0.02	0.036	0.119		0.11	0.037	0.17	0.189
	0.032	0.039	0.076	0.021		0.2	0.14	0.02	0.127
	0.033	0.11	0.055	0.043		0.209	0.103	0.031	0.284
	0.038	0.278	0.079	0.067		0.171	0.194	0.209	0.528
	0.022	0.079	0.039	0.114		0.078	0.155	0.208	0.498
	0.073	0.092	0.058	0.049		0.182	0.134	0.097	0.085
	0.053	0.02	0.172	0.049		0.168	0.316	0.168	0.268
	0.073	0.046	0.043	0.112		0.1	0.166	0.246	0.135
	0.147	0.294	0.034	0.057		0.18	0.306	0.142	0.528
	0.025	0.061	0.124	0.06		0.179	0.126	0.067	0.244
	0.104	0.166	0.166	0.079		0.167	0.119	0.121	0.041
	0.958	0.101	0.093	0.074		0.2	0.053	0.023	0.106
	0.055	0.042	0.056	0.102		0.238	0.037	0.591	0.047
	0.072	0.074	0.081	0.049		0.038	0.184	0.072	0.053
	0.106	0.17	0.037	0.195		0.026	0.044	0.054	0.064
	0.033	0.059	0.094	0.063		0.174	0.145	0.18	0.122
	0.069	0.087	0.025	0.122		0.224	0.163	0.038	0.125
	0.055	0.027	0.037	0.109		0.204	0.04	0.024	0.172
	0.114	0.213	0.079	0.054		0.149	0.052	0.22	0.156
	0.02	0.057	0.04	0.062		0.082	0.106	0.062	0.229
	0.05	0.058	0.055	0.075		0.147	0.121	0.033	0.171
	0.058	0.033	0.063	0.029		0.081	0.099	0.147	0.256
	0.15	0.054	0.108	0.023		0.222	0.17	0.193	0.309
	0.107	0.061	0.078	0.091		0.107	0.047	0.127	0.075
	0.079	0.2	0.07	0.17		0.215	0.08	0.104	0.108
	0.027	0.071	0.099	0.023		0.163	0.137	0.17	0.076
	0.038	0.075	0.109	0.111		0.144	0.036	0.064	0.209
	0.079	0.047	0.053	0.101		0.072	0.066	0.025	0.183
	0.083	0.089	0.03	0.057		0.121	0.028	0.082	0.082
	0.052	0.103	0.044	0.026		0.272	0.121	0.059	0.256
	0.047	0.235	0.225	0.038		0.147	0.193	0.211	0.166
	0.099	0.027	0.104	0.112		0.183	0.048	0.205	0.057
	0.087	0.049	0.149	0.087		0.212	0.078	0.318	0.16
	0.037	0.097	0.06	0.05		0.079	0.033	0.073	0.231
	0.124	0.143	0.151	0.052		0.171	0.092	0.142	0.204
	0.085	0.109	0.03	0.063		0.119	0.048	0.238	0.217
	0.304	0.147	0.028	0.177		0.106	0.134	0.337	0.213
	0.052	0.028	0.036	0.136		0.102	0.092	0.147	0.159
	0.075	0.22	0.13	0.084		0.093	0.047	0.097	0.073
	0.026	0.087	0.032	0.135		0.082	0.111	0.066	0.212
	0.178	0.039	0.025	0.032		0.235	0.129	0.254	0.112
	0.132	0.093	0.232	0.02		0.032	0.038	0.251	0.365
	0.088	0.103	0.031	0.024		0.071	0.075	0.067	0.065
	0.028	0.145	0.083	0.176		0.153	0.092	0.159	0.125
	0.055	0.092	0.044	0.081		0.119	0.037	0.184	0.07
[truncated: 53,687 more rows]
