# Supplementary material for: A DARPin-based molecular toolset to probe gephyrin and inhibitory synapse biology
Source: eLife journal article supplement (doi:10.7554/elife.80895), 2022-10-31
Supplement: supp [file elife-80895-supp-v1.zip › elife_poa_e80895_Figure_4_source_data_2.xlsx]

## Sheet: Panels A + B
	Panel A: Example of the distribtion of relative pS270 signal in the stratum pyramidale of CA1												Panel B: Example of the distribtion of relative pS270 signal in the stratum pyramidale of CA1 with respect to puncta size
	Pooled Intensity values												Pooled Intensity ratio values relative to puncta size
	Oriens			Pyramidale			Radiatum			S.L.M.			Oriens			Pyramidale			Radiatum			S.L.M.
	Ab7a	27G2		Ab7a	27G2		Ab7a	27G2		Ab7a	27G2		Puncta size	pS270 signal		Puncta size	pS270 signal		Puncta size	pS270 signal		Puncta size	pS270 signal
	1.07709	0.827026		1.67277	0.999524		0.997379	1.00548		0.953937	1.10339		0.102	0.709106		0.536	0.551824		0.046	0.931021		0.034	1.06821
	0.941785	1.14322		1.32576	0.872137		0.980747	1.14081		0.943737	0.91598		0.024	1.12105		0.782	0.607527		0.032	1.07424		0.11	0.896355
	0.946898	0.852581		1.15828	1.18191		0.95694	0.876211		1.06283	1.05732		0.055	0.831529		0.138	0.942364		0.079	0.845608		0.041	0.918734
	0.929432	0.811696		1.00953	0.925553		0.980162	0.978993		0.999267	1.02906		0.143	0.80653		0.033	0.846695		0.084	0.922415		0.085	0.951052
	0.944678	0.821072		0.955896	0.893826		0.968793	0.896426		1.01086	1.03184		0.077	0.80268		0.035	0.86355		0.138	0.854532		0.127	0.942682
	0.938499	1.33691		0.96963	1.01622		1.00358	0.998836		1.0528	0.881455		0.072	1.31557		0.108	0.967888		0.105	0.919154		0.101	0.773215
	0.958164	0.941117		1.02222	1.04293		0.954224	0.897533		1.02062	1.09767		0.097	0.907087		0.091	0.942231		0.032	0.86865		0.062	0.993239
	1.05857	1.09947		0.972385	0.900804		1.04683	1.21043		1.05532	1.02621		0.102	0.959197		0.046	0.855534		0.156	1.06785		0.045	0.898046
	0.981897	0.851708		1.00837	1.03896		0.959523	0.898431		1.07853	1.14321		0.06	0.801068		0.156	0.951533		0.047	0.864718		0.137	0.978901
	0.940573	0.808751		0.967959	0.94462		0.941413	0.843905		0.934463	0.876874		0.125	0.794086		0.115	0.90125		0.026	0.827863		0.036	0.866603
	0.986457	0.829576		0.947821	0.84852		0.942525	0.86786		0.992303	0.922023		0.121	0.776646		0.073	0.826762		0.026	0.850358		0.073	0.858109
	0.939285	0.835426		0.951679	1.05416		0.960136	0.963846		1.07984	1.20773		0.14	0.821401		0.046	1.02297		0.078	0.927086		0.123	1.03289
	1.05007	1.10578		0.944163	1.0755		1.09624	1.0173		1.08019	1.20596		0.177	0.972506		0.076	1.05198		0.232	0.857016		0.226	1.03104
	1.10834	1.51242		1.00657	1.04232		0.952961	0.818406		0.988545	0.948408		0.298	1.26021		0.217	0.956316		0.034	0.793119		0.138	0.886021
	1.80675	0.936092		0.962023	0.900069		1.09565	0.896337		1.01241	1.03757		0.579	0.478483		0.121	0.864042		0.303	0.755517		0.148	0.946465
	0.997523	0.864508		1.08876	1.49535		0.966559	0.941289		1.05068	0.965273		0.095	0.800371		0.365	1.2684		0.031	0.899372		0.261	0.848447
	0.908523	0.81214		0.975922	0.97784		0.933619	0.830509		1.00695	0.945773		0.028	0.825543		0.093	0.925332		0.035	0.821522		0.07	0.867407
	0.965093	0.972821		0.958311	0.824285		0.976204	1.112		0.966766	0.838896		0.122	0.930912		0.068	0.794357		0.08	1.05198		0.031	0.801368
	1.10155	1.2533		1.00346	1.02032		0.984144	1.12283		0.935232	1.02936		0.233	1.05075		0.129	0.939026		0.085	1.05366		0.109	1.01646
	0.926122	0.946054		0.924782	0.858767		0.944678	0.864813		1.01064	0.956388		0.053	0.943393		0.025	0.857593		0.032	0.845441		0.134	0.873939
	0.996137	1.10179		0.953868	0.963133		1.04234	0.838737		0.954201	0.9148		0.079	1.02147		0.067	0.932487		0.027	0.743123		0.053	0.885383
	0.982802	0.992304		1.06801	1.10957		0.933682	0.961117		1.04048	1.02453		0.075	0.932446		0.226	0.959459		0.057	0.950653		0.167	0.909363
	0.907832	0.820869		0.924158	0.844076		0.947363	0.98766		0.990499	0.977676		0.029	0.835051		0.025	0.843492		0.1	0.9628		0.218	0.911562
	1.00712	0.859141		0.952963	1.05019		0.958158	1.01015		0.964631	1.02183		0.083	0.787825		0.088	1.01774		0.03	0.973626		0.115	0.978279
	0.925348	0.919862		0.927981	0.901415		0.960187	0.995841		1.00218	0.997892		0.048	0.918041		0.043	0.897079		0.137	0.957809		0.104	0.919564
	0.929986	1.02812		0.998935	0.912135		0.968869	0.987057		0.935386	0.910511		0.09	1.02097		0.063	0.843271		0.105	0.940853		0.098	0.898957
	0.962559	0.812887		1.00844	1.06856		0.947533	0.819816		1.06658	1.08979		0.171	0.779916		0.132	0.978581		0.027	0.799038		0.142	0.943607
	0.903851	0.841266		0.987729	1.02398		0.992656	1.06346		1.00647	1.07823		0.039	0.859569		0.177	0.957414		0.122	0.989388		0.193	0.989361
	0.969115	0.809928		0.947928	0.848175		0.988498	1.10278		1.05992	1.17704		0.065	0.771819		0.066	0.826334		0.102	1.03028		0.284	1.02557
	0.904949	0.820047		0.944323	0.975182		1.00534	1.07618		1.0556	0.856379		0.034	0.836873		0.025	0.953696		0.102	0.988588		0.02	0.749227
	0.956499	0.933472		0.968372	0.888232		0.982368	1.07161		0.961606	0.950099		0.064	0.901285		0.041	0.847089		0.149	1.00741		0.041	0.912466
	0.956278	1.03374		0.956534	0.934361		0.955751	0.999532		1.05201	1.1276		0.13	0.998328		0.112	0.902109		0.117	0.965822		0.136	0.989881
	1.0249	0.949818		0.961264	1.02747		1.02446	1.16592		1.01017	1.1237		0.034	0.855859		0.086	0.987123		0.218	1.05105		0.117	1.02731
	0.950788	1.01841		0.967583	1.01702		1.03378	0.84855		1.08749	1.07243		0.134	0.989195		0.039	0.970699		0.058	0.758043		0.294	0.910734
	1.02167	1.203		1.00811	1.00847		0.985836	0.997709		0.972252	1.00574		0.23	1.08743		0.11	0.923842		0.108	0.934639		0.045	0.955324
	1.04464	1.06893		1.04469	1.29016		0.949082	0.856059		1.05801	1.10385		0.122	0.944991		0.248	1.14052		0.022	0.833		0.213	0.963527
	1.03762	1.10306		0.93557	0.828967		0.956222	0.854558		1.0028	1.0487		0.207	0.981761		0.079	0.818287		0.047	0.825331		0.124	0.965781
	1.07768	1.26927		0.982908	0.929484		0.93532	0.892884		1.01604	1.05681		0.106	1.0877		0.097	0.873322		0.036	0.881616		0.19	0.960576
	0.926552	0.829456		0.964181	0.813442		0.97677	1.0882		1.01398	1.06389		0.023	0.82674		0.021	0.779135		0.116	1.02887		0.131	0.968969
	0.918978	0.939352		0.962171	0.843496		0.958626	0.994099		0.940192	0.892091		0.09	0.943992		0.023	0.809609		0.076	0.957691		0.082	0.876268
	1.26428	0.83974		1.10959	1.1664		0.943088	0.834215		2.17105	1.0392		0.343	0.613406		0.423	0.970803		0.063	0.816903		0.215	0.442051
	0.939656	1.18378		0.951544	0.865061		0.955619	0.961157		1.08888	1.22		0.058	1.16344		0.033	0.839582		0.063	0.928869		0.165	1.03472
	0.957003	0.89385		1.01119	0.858436		1.00138	1.13173		1.09742	1.11788		0.034	0.862574		0.043	0.784011		0.09	1.04374		0.195	0.940738
	1.07872	1.1783		0.973836	0.863321		0.944767	0.895427		0.982323	1.03431		0.277	1.00877		0.055	0.818713		0.065	0.875288		0.127	0.972391
	0.968215	0.876433		0.989957	1.08067		1.03993	1.13684		0.946525	1.01711		0.025	0.835972		0.114	1.00814		0.127	1.00957		0.027	0.992388
	1.04388	1.23229		0.983604	0.821422		0.941732	0.831144		1.07473	1.14486		0.21	1.09021		0.131	0.771243		0.031	0.815068		0.137	0.983774
	0.945182	0.839851		0.986854	0.943784		0.95718	0.880346		1.04688	1.14588		0.056	0.820601		0.149	0.883212		0.034	0.849385		0.214	1.01085
	0.93297	0.86115		0.919842	0.905696		0.958608	0.892048		1.13692	1.37566		0.02	0.852424		0.048	0.909314		0.052	0.859394		0.389	1.11745
	0.984221	0.896207		0.967204	0.812869		0.962135	0.869109		1.05679	1.08817		0.055	0.840932		0.053	0.776153		0.075	0.834225		0.155	0.950943
	0.913182	0.891181		0.931763	0.850789		0.952198	0.944927		1.0279	0.981857		0.041	0.901267		0.025	0.843259		0.057	0.916465		0.117	0.882153
	0.997835	0.899469		0.956451	1.09005		1.0209	1.10299		1.05805	1.21742		0.113	0.832477		0.025	1.05251		0.135	0.997785		0.226	1.06262
	1.01587	0.91961		1.27254	0.844262		0.960243	0.847501		1.11651	1.27883		0.131	0.83601		0.311	0.612702		0.025	0.815086		0.169	1.05778
	0.96169	1.03434		0.937982	0.820129		0.970586	0.939964		1.02237	1.14871		0.092	0.993284		0.059	0.807482		0.07	0.89438		0.203	1.03764
	0.993599	0.951419		0.984761	1.05007		0.96134	0.906224		0.951297	0.974799		0.086	0.884313		0.085	0.984765		0.212	0.870569		0.051	0.946333
	1.08329	1.14114		0.984835	1.03385		1.09539	0.866501		0.99465	1.08792		0.145	0.97284		0.114	0.969484		0.251	0.73054		0.149	1.01012
	0.99897	0.908618		0.98986	0.860607		0.95607	0.943016		0.962061	1.05852		0.031	0.839989		0.231	0.802927		0.07	0.910907		0.058	1.01612
	0.997329	1.23606		0.960087	0.905503		0.949807	0.921017		1.01359	1.00543		0.114	1.14458		0.045	0.871012		0.023	0.895524		0.071	0.916081
	1.00172	0.964036		0.9441	0.862752		0.970542	1.15078		1.02387	1.18773		0.125	0.888779		0.129	0.843943		0.088	1.09502		0.163	1.07132
	0.935245	0.830532		0.96337	0.828361		0.95071	0.833315		1.02393	1.12866		0.087	0.820118		0.053	0.794094		0.047	0.80948		0.231	1.01797
	0.953766	0.956584		0.975803	0.909095		0.951542	0.905031		1.15713	1.22669		0.108	0.926246		0.138	0.860384		0.102	0.878376		0.234	0.979034
	1.33199	1.64606		0.956082	0.869709		0.95949	0.842551		1.02962	1.0253		0.475	1.14127		0.031	0.840086		0.037	0.810963		0.168	0.919643
	0.904149	0.83822		0.967452	0.953026		1.01507	1.15777		0.981478	1.16292		0.04	0.856176		0.176	0.909746		0.151	1.05335		0.092	1.09425
	0.961536	0.918419		1.03933	0.936528		0.963848	1.17276		0.985855	1.02607		0.112	0.882106		0.183	0.832171		0.057	1.12369		0.1	0.961192
	0.960031	0.882661		0.948872	0.878473		0.969174	0.869233		0.935768	0.892276		0.047	0.84909		0.027	0.854998		0.035	0.828285		0.065	0.880594
	0.933275	0.81947		0.962073	0.929318		0.974244	0.843252		2.04556	0.990127		0.029	0.810902		0.058	0.892075		0.034	0.799345		0.203	0.447017
	0.930428	1.01964		1.00139	1.02739		0.97797	1.05593		2.04294	0.89701		0.131	1.01207		0.144	0.947494		0.066	0.997137		0.124	0.405496
	1.03261	1.16157		0.983907	0.885893		0.959726	1.01232		0.954637	0.964928		0.166	1.03885		0.159	0.831518		0.072	0.974127		0.129	0.933473
	0.971801	0.841988		0.920442	0.835519		1.04773	1.32693		1.10697	1.21612		0.215	0.800154		0.037	0.83831		0.149	1.16962		0.246	1.01458
	1.01721	1.08636		0.964195	0.855173		0.956864	0.977479		0.953545	0.871805		0.089	0.986298		0.085	0.819095		0.064	0.943414		0.067	0.844351
	0.965118	0.99144		0.94784	0.982554		1.06439	1.08255		0.979881	0.985881		0.069	0.948704		0.042	0.957341		0.197	0.939273		0.093	0.929171
	0.922615	0.820356		1.04305	1.07522		0.955161	0.882063		0.986043	1.08307		0.029	0.821158		0.142	0.952002		0.025	0.852841		0.188	1.01439
	0.95579	0.934261		0.951333	0.843044		0.965021	1.0232		1.00913	1.02593		0.079	0.902715		0.026	0.818394		0.067	0.979193		0.169	0.938896
	1.00962	0.968426		0.989417	1.12115		0.96761	1.03392		1.02919	1.07624		0.079	0.885835		0.073	1.04648		0.078	0.98681		0.126	0.965739
	0.964242	0.889426		0.969056	0.815186		1.01403	1.3273		1.08627	1.30673		0.045	0.851861		0.026	0.776878		0.185	1.20882		0.193	1.11094
	1.04474	1.0598		0.948193	0.876027		0.940481	0.819066		1.13379	1.25432		0.346	0.936829		0.02	0.85323		0.034	0.804292		0.555	1.02168
	1.05985	1.30081		0.972348	1.05969		0.964149	0.832848		1.67348	1.03567		0.177	1.13348		0.109	1.00647		0.033	0.79775		0.247	0.571537
	1.00533	0.827106		0.950118	0.926152		1.00893	1.09179		1.04226	1.08542		0.16	0.759799		0.025	0.900223		0.108	0.999361		0.343	0.961758
	1.0242	1.12896		0.971146	1.07715		0.935171	0.829943		0.934068	0.919971		0.226	1.01798		0.1	1.02432		0.034	0.819601		0.062	0.909579
	0.933307	0.822341		0.938636	0.82709		1.15047	0.946179		0.972647	1.13545		0.031	0.813714		0.062	0.813768		0.397	0.759529		0.074	1.0781
	0.946062	0.837646		0.917384	0.828779		0.972522	0.870859		1.23764	0.862999		0.048	0.817684		0.032	0.83432		0.084	0.826977		0.393	0.643962
	1.08129	1.26123		0.945562	0.830882		0.999255	1.06091		0.936285	0.895758		0.258	1.07719		0.047	0.811511		0.098	0.980498		0.024	0.883544
	0.954184	0.847202		0.937981	0.865587		0.942438	0.911612		1.01271	0.996901		0.115	0.819973		0.078	0.852239		0.029	0.89331		0.161	0.909104
	0.951955	1.00812		0.991295	1.01469		1.09808	0.890082		1.02969	1.12004		0.052	0.978009		0.106	0.94531		0.193	0.748583		0.158	1.00455
	0.993721	0.895586		0.967867	1.04209		0.952548	0.896014		0.97644	0.930172		0.087	0.832315		0.178	0.994336		0.079	0.868706		0.045	0.879757
	0.92501	0.936351		1.04041	1.25976		0.949132	0.818833		0.999371	1.01728		0.067	0.934839		0.284	1.11822		0.024	0.796734		0.145	0.940065
	0.977284	0.847616		0.945447	0.846059		0.950577	0.863751		0.98978	0.939573		0.108	0.800983		0.022	0.826434		0.037	0.839163		0.094	0.876671
	0.920531	0.850104		1.03909	0.991191		0.950279	1.02918		0.998134	0.924484		0.046	0.852862		0.216	0.880948		0.088	1.0002		0.092	0.855372
	0.947168	0.839708		0.959384	0.87029		1.07047	1.12217		1.01624	1.11306		0.043	0.81874		0.095	0.837754		0.174	0.968112		0.167	1.0115
	0.933041	1.05788		1.07151	1.16946		0.978326	0.998699		0.906197	1.04051		0.053	1.04708		0.175	1.00794		0.148	0.942749		0.046	1.0604
	0.991561	1.09995		1.0353	1.19846		0.953737	0.861771		1.05883	1.06189		0.059	1.02447		0.192	1.06906		0.058	0.834465		0.148	0.926185
	0.939851	0.818073		0.994488	0.955549		0.923977	0.810576		0.965496	1.0182		0.025	0.803855		0.054	0.887356		0.024	0.810172		0.139	0.973933
	1.0109	0.829857		0.992165	1.00922		1.08695	0.833567		0.970159	0.916252		0.136	0.758125		0.093	0.939389		0.237	0.70823		0.11	0.872202
	1.07672	1.24062		0.915429	0.814706		0.966539	0.907402		0.975311	0.94417		0.194	1.06409		0.022	0.821904		0.05	0.867012		0.035	0.89403
	0.948025	0.900824		0.971884	0.925697		0.969595	0.87395		0.96211	1.00084		0.033	0.877535		0.087	0.879629		0.087	0.832418		0.109	0.960694
	0.958557	0.9087		1.01178	0.851747		1.02554	1.05865		0.973858	0.895036		0.118	0.875483		0.169	0.777441		0.112	0.953333		0.092	0.848769
	0.985278	0.870849		0.986659	0.934312		1.01033	1.11868		1.08851	1.05716		0.083	0.816261		0.042	0.87452		0.197	1.02256		0.154	0.896916
	0.967028	0.8255		0.95334	0.928971		0.977642	0.967101		0.996262	0.919831		0.079	0.788358		0.034	0.89991		0.087	0.91356		0.067	0.852667
	0.92693	0.885239		0.941862	0.845332		0.954661	0.889706		0.998735	0.940451		0.039	0.881979		0.027	0.828867		0.037	0.860681		0.079	0.869623
	0.921211	0.824417		0.933605	0.831404		1.003	1.04275		1.05019	1.04775		0.034	0.826481		0.029	0.822421		0.143	0.960121		0.084	0.921376
	1.00609	0.968834		0.935823	0.85833		1.04118	1.15643		0.995952	0.98213		0.094	0.889317		0.024	0.847043		0.171	1.02574		0.065	0.9107
	0.948576	0.848021		1.11685	0.96978		1.05223	1.23028		0.977527	0.898439		0.031	0.825618		0.444	0.801908		0.199	1.07978		0.047	0.848798
	0.934628	0.917291		1.0214	0.841046		0.977153	0.926632		0.974708	0.929834		0.029	0.906386		0.028	0.76045		0.1	0.875769		0.125	0.881001
	1.00967	1.03271		0.951877	0.826888		0.993887	0.896813		0.961347	0.911402		0.057	0.944596		0.029	0.802252		0.081	0.833316		0.034	0.875537
	0.951683	0.86632		0.949101	0.841985		0.955416	0.875005		1.08092	1.1746		0.035	0.84068		0.066	0.819289		0.075	0.845791		0.231	1.00355
	0.93387	0.834314		0.98539	1.0302		0.95846	0.951207		1.00248	1.05514		0.038	0.825064		0.063	0.965513		0.125	0.916529		0.144	0.972021
	0.924071	0.817342		0.966417	0.973261		0.960835	0.912748		1.07599	1.02603		0.064	0.816852		0.147	0.930058		0.054	0.877298		0.145	0.880631
	1.12338	1.22127		0.933362	0.827882		0.979583	0.842124		0.96204	0.876929		0.415	1.00399		0.021	0.81915		0.025	0.793925		0.033	0.841814
	0.929846	0.935112		1.00666	0.971065		0.947233	0.952861		0.998299	1.15575		0.046	0.928747		0.038	0.890866		0.044	0.929004		0.125	1.06917
	1.02171	1.0317		0.950917	0.926133		0.970649	0.920098		0.997633	1.07512		0.048	0.93255		0.114	0.899447		0.148	0.875421		0.02	0.995251
	1.00716	1.12367		0.93504	0.828095		1.02408	1.07412		0.963404	1.14314		0.105	1.03035		0.025	0.81789		0.163	0.968636		0.088	1.09581
	0.998509	1.14129		0.961294	0.833656		0.956245	0.967443		0.998465	0.967457		0.117	1.05558		0.055	0.800895		0.048	0.934331		0.139	0.894837
	1.00718	0.833944		0.966392	0.877248		0.955239	0.944203		1.05332	0.971019		0.052	0.76467		0.032	0.838328		0.058	0.912847		0.144	0.851359
	1.0017	1.13299		0.997079	1.07929		0.950221	0.821766		1.0186	1.07221		0.09	1.04457		0.144	0.999657		0.025	0.798672		0.183	0.972116
	0.93892	0.818019		1.02696	1.23891		0.940876	0.825461		1.06855	1.12418		0.036	0.804599		0.149	1.11413		0.021	0.810231		0.332	0.971605
	0.999816	0.919595		1.01528	0.841827		1.00994	1.14182		1.0172	1.03515		0.17	0.849418		0.169	0.765742		0.151	1.04412		0.039	0.939814
	0.913928	0.824535		1.09297	1.55529		0.95126	1.0464		1.04576	1.06675		0.023	0.833187		0.255	1.31416		0.05	1.01588		0.219	0.942055
	0.932363	0.850107		0.98682	0.821757		0.951381	0.847299		1.04297	0.997753		0.022	0.842042		0.14	0.769043		0.031	0.822483		0.053	0.883475
	0.913675	0.854646		1.06176	0.823989		0.941977	0.880499		1.15767	1.33462		0.097	0.863852		0.05	0.716703		0.081	0.863243		0.331	1.06468
	1.02341	1.07771		1.00069	1.11052		0.972585	0.897324		0.991959	1.16593		0.209	0.97252		0.117	1.02488		0.052	0.852053		0.139	1.08549
	1.01841	1.28424		0.942436	0.882906		1.02663	0.98176		0.979217	1.08192		0.191	1.16458		0.036	0.865183		0.128	0.88315		0.066	1.02038
	0.954864	0.911574		1.25694	1.5789		0.968974	0.965842		0.941112	0.85055		0.073	0.881648		0.398	1.16007		0.093	0.920532		0.026	0.834648
	0.977822	1.04173		0.987345	1.10988		0.965323	0.836694		0.993839	0.95438		0.208	0.983876		0.14	1.03813		0.089	0.800459		0.071	0.88685
	1.00628	1.07703		0.986933	0.82672		0.972445	0.932503		1.10788	1.08746		0.106	0.988454		0.051	0.773598		0.117	0.885585		0.361	0.906498
	0.919903	0.890868		0.925331	0.831436		0.962295	0.827797		0.922539	0.849207		0.094	0.894368		0.033	0.829807		0.061	0.794439		0.03	0.850108
	0.99666	0.993506		0.95276	0.872395		0.9597	0.851437		1.00463	1.00635		0.12	0.920594		0.036	0.845619		0.046	0.819335		0.034	0.925093
	0.931807	0.836899		0.978946	1.0391		0.994183	1.08526		1.07264	1.15245		0.06	0.829453		0.115	0.980264		0.086	1.00812		0.178	0.992236
	0.993938	0.941188		0.950901	0.856447		0.943634	0.875573		1.11421	1.14172		0.078	0.874504		0.066	0.831784		0.024	0.856907		0.345	0.946325
	1.0005	1.09678		1.0165	1.00228		0.95738	0.944066		0.995854	1.04183		0.039	1.01238		0.129	0.910598		0.099	0.910674		0.042	0.966153
	0.928687	0.930787		0.962904	0.825422		0.936226	0.881941		1.02053	0.951677		0.07	0.925606		0.036	0.791658		0.115	0.869969		0.137	0.861207
	0.979121	1.10911		0.943535	0.829208		0.974588	0.846597		0.970462	0.980273		0.067	1.04612		0.031	0.811617		0.038	0.802233		0.051	0.932854
	0.965041	1.00684		0.986112	0.950771		0.9372	0.87458		1.06176	1.13961		0.047	0.963515		0.12	0.890419		0.025	0.861811		0.171	0.991231
	1.05824	1.07905		1.14857	0.881583		0.964193	0.932148		1.03067	1.16868		0.182	0.941674		0.286	0.708846		0.05	0.892824		0.104	1.04718
	0.964539	0.977902		0.934251	0.886023		0.969598	0.910809		0.94982	0.956193		0.036	0.936312		0.038	0.875843		0.077	0.867522		0.073	0.929714
	0.936062	0.8461		0.979965	0.95113		0.937207	0.876076		1.01859	1.17114		0.072	0.834761		0.095	0.896343		0.05	0.863279		0.269	1.06182
	0.955511	0.882958		1.00304	0.842553		0.952021	0.839398		0.999849	1.01344		0.03	0.853394		0.086	0.775755		0.036	0.814267		0.057	0.936072
	1.01052	0.97229		0.971922	0.982399		0.972175	0.929032		0.98982	0.912607		0.095	0.888579		0.088	0.933472		0.038	0.882533		0.028	0.851476
	1.21608	1.80289		1.028	0.994676		0.932375	0.82982		1.02426	1.03909		0.262	1.36915		0.079	0.89358		0.022	0.821937		0.023	0.936893
	1.00046	0.869833		0.963361	0.832794		0.963452	0.892165		1.00274	1.07544		0.093	0.802936		0.114	0.79835		0.102	0.855185		0.113	0.990478
	1.05707	1.07194		1.36533	0.818185		0.996282	0.977767		0.97758	0.954796		0.17	0.936504		0.346	0.553426		0.088	0.906355		0.13	0.901993
	0.912255	0.837972		0.993932	1.03326		0.930605	0.830063		0.964261	0.836619		0.022	0.848317		0.146	0.960063		0.022	0.823741		0.022	0.801268
	1.00686	0.995354		0.94738	0.959038		0.94038	0.834369		0.989842	0.935175		0.118	0.912967		0.097	0.934882		0.02	0.819408		0.106	0.872513
	0.92334	0.884655		1.0109	0.979714		0.99419	1.05098		0.970873	0.895186		0.043	0.884825		0.047	0.895024		0.141	0.976273		0.05	0.851521
	0.943974	1.01702		2.09712	1.11888		0.973405	0.866626		0.966185	0.911587		0.046	0.994984		0.788	0.492728		0.036	0.82221		0.044	0.87133
	1.04072	1.14434		0.932766	0.831039		0.966819	1.02029		1.06164	1.02999		0.178	1.01547		0.028	0.822799		0.133	0.974592		0.285	0.895985
	1.21954	1.69321		1.03122	1.10354		0.931847	0.874933		1.06251	1.18365		0.246	1.28221		0.156	0.988284		0.053	0.867112		0.184	1.02882
	0.943422	0.913606		0.987832	0.846301		0.97391	1.09326		0.97144	0.994968		0.059	0.89433		0.023	0.7912		0.099	1.03669		0.069	0.945884
	0.992583	1.01372		0.947818	0.966256		0.982498	0.99189		1.01036	1.00177		0.064	0.943188		0.103	0.941483		0.13	0.932345		0.149	0.915668
	0.966981	0.868628		1.04599	0.877974		0.958788	0.918887		1.05003	1.12784		0.027	0.829585		0.162	0.775176		0.058	0.885084		0.33	0.991949
	1.09167	1.19315		0.974822	0.824431		0.954205	0.889389		1.00137	0.926374		0.205	1.00937		0.02	0.781041		0.032	0.860786		0.106	0.854355
	0.98285	0.848456		1.14232	0.853578		0.960298	0.980509		1.00954	1.16813		0.049	0.797237		0.244	0.690084		0.051	0.942954		0.088	1.0686
	0.96695	0.88542		0.944987	0.852342		0.965284	0.914167		1.04926	1.05451		0.044	0.84565		0.023	0.832977		0.08	0.874612		0.127	0.928139
	0.925163	0.833604		1.04144	0.848762		0.973124	0.921077		1.07136	1.16824		0.05	0.832121		0.174	0.752656		0.073	0.874123		0.197	1.00703
	0.9824	0.852314		0.944881	0.844476		0.959868	1.11671		1.08399	1.0476		0.045	0.801228		0.05	0.825381		0.125	1.07442		0.194	0.892516
	0.934387	1.22876		0.925428	0.835259		0.927273	0.871102		1.07189	1.05208		0.038	1.21446		0.043	0.833534		0.026	0.867574		0.252	0.906444
	1.08107	1.28777		0.934704	0.830764		0.928301	0.879265		0.999329	0.972609		0.239	1.10009		0.062	0.820821		0.051	0.874734		0.083	0.898824
	1.14881	1.44027		1.11518	1.23534		0.928661	0.963843		0.98677	0.908378		0.225	1.15782		0.101	1.02303		0.039	0.958504		0.075	0.85015
	1.12763	1.34994		0.961085	0.822105		0.930116	0.926917		1.11864	1.24416		0.285	1.10559		0.031	0.789969		0.057	0.92034		0.334	1.02714
	1.15358	1.20474		0.962615	0.860446		0.966161	0.869467		1.05744	1.04208		0.205	0.964468		0.042	0.825497		0.09	0.831091		0.15	0.9101
	1.27829	1.82282		0.978808	0.968725		0.951195	0.830267		1.01888	0.984885		0.313	1.31692		0.095	0.914004		0.027	0.806108		0.026	0.892705
	1.12913	1.3274		0.97295	0.920448		0.948719	0.853766		1.02254	1.11215		0.322	1.08568		0.102	0.873683		0.057	0.831086		0.151	1.00445
	1.04037	1.52697		0.9416	0.899918		0.963008	0.940159		0.991279	0.998032		0.198	1.35547		0.069	0.882637		0.116	0.901605		0.122	0.929808
	0.943987	0.894553		0.959462	0.923829		1.01266	1.08316		0.99789	0.962215		0.034	0.875155		0.153	0.889219		0.224	0.987806		0.113	0.890501
	0.965739	0.848702		1.02602	0.865142		0.953793	0.846161		1.02621	1.1619		0.14	0.811597		0.07	0.778714		0.048	0.819302		0.146	1.04563
	0.93307	0.825235		0.942735	0.867758		0.989663	0.95802		0.971618	0.928017		0.02	0.816786		0.05	0.850068		0.093	0.893989		0.026	0.882075
	0.923399	1.12719		0.934591	0.819388		0.98996	1.07161		0.974234	0.976154		0.041	1.12734		0.053	0.809679		0.121	0.999683		0.072	0.925337
	1.07558	1.12433		0.972054	0.865686		0.953396	0.888605		1.00304	0.94792		0.254	0.965376		0.07	0.822461		0.024	0.860756		0.123	0.87277
	1.04536	1.02288		0.986588	0.928149		0.976287	0.89643		1.00039	1.05753		0.133	0.903658		0.021	0.868814		0.095	0.847977		0.103	0.976262
	0.930692	0.819733		0.95496	0.85973		0.987408	1.05668		0.986831	1.07908		0.028	0.813413		0.087	0.831422		0.069	0.988302		0.214	1.00985
	0.940973	0.813618		0.991111	0.850431		1.01187	1.04941		1.07122	1.22667		0.042	0.798525		0.146	0.792431		0.12	0.957781		0.193	1.05754
	1.02581	0.948345		0.96718	0.900101		1.00989	0.955138		1.0641	1.05401		0.085	0.853773		0.022	0.859466		0.04	0.873444		0.176	0.914758
	1.07781	1.10324		0.974785	0.994135		0.937403	0.930597		1.00516	0.954761		0.166	0.945306		0.077	0.941849		0.03	0.916812		0.115	0.877214
	1.00724	1.15437		1.13036	0.875935		0.931344	0.834299		1.00347	1.02173		0.122	1.05841		0.268	0.715648		0.025	0.827288		0.188	0.940314
	1.14291	1.53429		1.01331	0.944235		0.954017	0.869864		1.00127	0.978867		0.271	1.23977		0.082	0.860566		0.038	0.842055		0.193	0.902853
	0.933313	0.824517		0.913848	0.824604		0.973896	0.84521		1.01964	0.935055		0.021	0.815864		0.021	0.833329		0.03	0.801487		0.205	0.846907
	1.51499	2.03262		0.983951	1.01987		0.969893	0.857042		0.998465	1.02998		0.369	1.23906		0.049	0.957231		0.06	0.816062		0.122	0.952667
	1.21119	1.46804		0.983805	0.955622		1.02897	1.03084		1.01026	0.985882		0.239	1.11937		0.04	0.897061		0.069	0.925195		0.127	0.901231
	1.01843	1.09786		0.939873	0.834734		0.959204	0.835397		0.914611	0.951463		0.058	0.995548		0.047	0.820208		0.028	0.804316		0.077	0.960728
	1.00848	1.20079		0.957451	0.883052		1.0234	1.06899		1.01712	1.02258		0.126	1.09962		0.049	0.851756		0.283	0.96466		0.126	0.928469
	1.02619	1.0494		0.946459	0.95101		0.955687	0.869982		1.09837	1.18585		0.095	0.944402		0.054	0.927958		0.026	0.840697		0.171	0.997066
	0.939642	0.944515		0.927801	0.829818		0.962794	0.940348		1.02006	1.06427		0.022	0.928307		0.021	0.825987		0.123	0.901987		0.157	0.963545
	1.01704	0.917847		1.04943	1.13613		0.964265	0.931438		0.982553	0.951228		0.106	0.833444		0.162	0.99982		0.08	0.892077		0.119	0.894074
	0.997211	1.08499		1.04263	1.32905		0.908795	0.894861		0.977546	0.989041		0.102	1.00481		0.132	1.17721		0.035	0.909357		0.077	0.934377
	0.956796	0.952627		0.98141	0.878273		1.0041	0.953925		0.936911	0.806966		0.079	0.919493		0.077	0.826465		0.05	0.877366		0.029	0.79543
	1.24186	1.69277		0.959999	0.927011		0.982061	0.893665		0.920255	0.889822		0.208	1.25884		0.057	0.891783		0.072	0.840391		0.061	0.892977
	1.21338	1.4028		0.929518	0.951795		0.948587	0.852905		0.987186	1.02895		0.44	1.06768		0.035	0.94565		0.033	0.830363		0.076	0.962587
	1.05971	1.22016		1.0234	0.825854		0.996745	1.0804		0.985795	0.941969		0.17	1.06335		0.08	0.745253		0.258	1.00102		0.116	0.88246
	0.986363	1.04573		1.03108	1.02465		0.927843	0.8348		0.975021	0.911946		0.148	0.979105		0.125	0.917755		0.051	0.830908		0.022	0.863774
	0.96768	1.22927		0.971058	1.01399		1.05919	1.16269		0.976499	0.998696		0.031	1.17317		0.058	0.964349		0.111	1.01376		0.096	0.944509
	1.01276	1.30533		0.979705	0.924971		0.975327	0.982155		0.989151	0.93713		0.107	1.19031		0.02	0.871922		0.035	0.929983		0.074	0.874948
	1.03965	1.15868		0.967277	0.845994		0.953372	0.898631		1.11215	1.22564		0.204	1.02925		0.085	0.807722		0.094	0.870491		0.097	1.01776
	1.04091	1.07612		0.957507	0.96271		0.97669	0.960332		1.03466	1.02741		0.234	0.954758		0.079	0.928535		0.109	0.90805		0.145	0.917048
	0.973218	0.919301		0.964264	0.827883		0.942999	0.836119		0.958622	1.00527		0.031	0.872355		0.05	0.792899		0.04	0.818845		0.034	0.968454
	1.06302	1.33136		1.6522	0.858249		0.993027	1.08784		1.02759	1.11933		0.243	1.15664		0.613	0.479728		0.143	1.01169		0.086	1.00597
	0.967774	1.0804		1.00251	1.06265		0.995615	0.922071		0.973147	0.879796		0.042	1.03099		0.097	0.978917		0.109	0.855298		0.028	0.834927
	1.03279	1.15132		0.947142	0.833145		1.00951	1.21952		1.00143	1.09933		0.169	1.0295		0.048	0.812364		0.123	1.11563		0.081	1.0138
	0.940285	0.846258		0.940654	0.888704		0.957759	0.910643		1.06747	1.13855		0.079	0.831167		0.033	0.872514		0.047	0.878085		0.181	0.985012
	0.965488	1.15362		0.941523	0.830279		0.956242	0.984338		1.02443	0.957906		0.074	1.10347		0.032	0.814401		0.085	0.950652		0.101	0.863549
	0.950102	0.84342		0.957889	1.05541		0.950414	0.913465		1.14541	1.3444		0.059	0.81982		0.075	1.01754		0.041	0.887614		0.269	1.08396
	0.950974	0.846906		1.00465	0.954295		0.933485	0.965805		0.983812	1.08374		0.043	0.822454		0.169	0.877226		0.027	0.955491		0.175	1.01733
	0.923765	0.881782		0.983491	0.839464		1.0584	0.824176		1.04112	1.05623		0.03	0.881545		0.067	0.788273		0.206	0.719141		0.213	0.936923
	0.950425	0.902642		1.65746	0.887986		0.974081	0.930785		1.06018	1.07459		0.062	0.877087		0.278	0.494774		0.065	0.882469		0.223	0.936071
	0.93338	0.825111		1.00578	0.881277		1.0097	1.06972		1.00776	1.06827		0.037	0.816392		0.245	0.809195		0.153	0.978414		0.086	0.978967
	0.987008	1.43956		0.93983	0.850286		0.960285	0.832298		1.09126	1.17569		0.069	1.34696		0.028	0.835527		0.041	0.800431		0.106	0.994969
	0.963553	0.835613		0.965098	0.88043		0.93154	0.863737		0.977556	1.04496		0.032	0.800893		0.021	0.842497		0.058	0.856297		0.032	0.987196
	1.01547	0.993465		0.971055	0.93267		0.997401	0.919818		0.969369	0.87236		0.069	0.903507		0.035	0.887011		0.218	0.851681		0.03	0.831097
	0.99775	1.07184		0.937917	0.833328		0.985687	1.02174		1.06994	1.08445		0.063	0.992093		0.054	0.820533		0.117	0.957293		0.237	0.936046
	1.05359	1.5528		1.00941	0.844705		1.02244	0.837786		0.980247	0.942562		0.173	1.36109		0.081	0.772831		0.181	0.756731		0.061	0.888014
	1.03399	1.11195		0.995473	0.989031		0.968877	0.95973		1.01874	1.00438		0.12	0.993143		0.114	0.91754		0.039	0.914798		0.351	0.910496
	0.93515	0.986404		0.954822	0.921646		0.966034	0.898796		1.07185	1.07907		0.129	0.974133		0.089	0.891428		0.057	0.859238		0.171	0.929736
	0.972307	0.99617		0.947261	0.875965		0.958902	0.920948		0.984129	1.00961		0.084	0.946182		0.062	0.854008		0.044	0.886963		0.085	0.947431
	0.948938	1.04668		1.12372	0.847881		1.0154	1.0215		1.028	1.13759		0.119	1.01864		0.077	0.696821		0.147	0.929067		0.119	1.02197
	0.931875	0.925343		0.954814	0.841743		0.940486	0.966576		1.05143	1.15749		0.092	0.917044		0.071	0.814153		0.027	0.949137		0.168	1.01668
	1.08659	1.4649		1.38116	0.862459		0.950356	0.847103		1.03407	1.04587		0.162	1.24505		0.325	0.576684		0.076	0.82318		0.093	0.934063
	1.06709	1.18851		1.04113	1.12499		0.958521	0.832909		0.953983	0.941096		0.164	1.0286		0.046	0.997906		0.025	0.802492		0.052	0.911041
	1.05285	1.22269		0.940033	0.825965		0.952924	0.859001		0.999751	0.921259		0.18	1.07249		0.03	0.811454		0.026	0.832492		0.204	0.851011
	1.05156	1.39122		1.03811	1.01664		0.967833	1.00751		1.03389	0.989663		0.235	1.22183		0.112	0.904422		0.044	0.961377		0.068	0.884012
	0.997197	1.14302		0.99344	0.897471		0.933827	0.848252		1.02053	1.02077		0.096	1.05857		0.024	0.834303		0.086	0.838887		0.131	0.923733
	0.950365	0.919413		0.957335	0.843804		0.969541	0.951171		1.04981	1.13726		0.035	0.89344		0.038	0.813996		0.049	0.906019		0.257	1.00045
	1.011	1.06363		0.935309	0.943761		0.967464	1.02214		1.01804	1.10243		0.218	0.971584		0.021	0.931863		0.042	0.975705		0.175	1.00008
	0.992239	1.05105		0.942853	0.90357		1.02205	0.844273		0.983409	1.01653		0.17	0.978251		0.062	0.88504		0.124	0.762881		0.101	0.954624
	0.947921	0.854703		1.00033	0.89242		0.929288	0.861189		1.06262	1.1132		0.022	0.832699		0.186	0.823891		0.042	0.855841		0.374	0.967477
	0.948042	0.813695		0.989184	0.881469		0.939905	0.838395		0.984443	0.860253		0.085	0.792645		0.12	0.822952		0.027	0.823776		0.075	0.807013
	0.967274	1.18968		0.971049	0.844919		0.967052	0.982373		0.983261	0.867697		0.14	1.13586		0.066	0.803561		0.034	0.938149		0.029	0.814975
	0.983655	0.861923		0.995059	1.04391		0.973834	0.902137		0.999282	0.98902		0.034	0.809227		0.129	0.968861		0.117	0.855525		0.129	0.914033
	0.982728	1.1835		0.956449	0.939486		0.956289	0.9689		1.02971	1.1285		0.09	1.11219		0.052	0.907138		0.057	0.935695		0.1	1.01212
	1.03907	1.26454		0.952463	0.833805		0.958268	0.92548		1.04236	1.16274		0.199	1.12391		0.033	0.808465		0.065	0.891919		0.142	1.03017
	1.0497	1.37254		1.07894	0.84384		0.89486	0.879149		1.00345	0.987347		0.187	1.20754		0.377	0.722285		0.047	0.907303		0.054	0.908697
	0.963928	0.931733		0.976954	0.977278		0.970247	0.967429		0.966752	1.01667		0.036	0.892672		0.076	0.923823		0.033	0.920835		0.041	0.9712
	1.10374	0.854163		0.953092	0.89129		0.959251	0.902011		1.07329	1.18862		0.232	0.714689		0.047	0.863632		0.038	0.86841		0.153	1.02275
	1.0498	1.09421		0.958213	0.821768		0.902045	0.851721		1.058	1.15539		0.143	0.962582		0.068	0.792013		0.079	0.871995		0.255	1.00852
	0.957469	0.985352		0.953814	0.842545		0.985943	1.00134		1.20797	1.38224		0.122	0.950411		0.072	0.815783		0.102	0.937942		0.16	1.05675
	0.990329	1.06002		1.05092	0.842048		0.920553	0.8233		0.99701	1.004		0.145	0.988507		0.258	0.739969		0.026	0.825951		0.12	0.929996
	1.03005	1.06048		1.36992	1.24835		0.948607	0.838368		1.0681	1.16792		0.151	0.9508		0.109	0.841558		0.04	0.816193		0.285	1.00982
	1.0084	1.14435		0.930305	0.845904		0.959794	0.84191		0.966656	0.950909		0.066	1.04802		0.034	0.839732		0.084	0.810089		0.02	0.908473
	0.896186	0.848252		0.984924	0.886743		0.998319	0.987578		0.988681	1.02963		0.031	0.874121		0.109	0.831457		0.082	0.91358		0.056	0.961768
	0.979642	1.07036		0.974079	0.876433		0.957868	0.815329		1.09759	1.09978		0.129	1.00904		0.041	0.830939		0.066	0.78609		0.309	0.925359
	1.08379	1.2096		0.955638	0.828824		0.971608	1.03672		0.978681	0.999592		0.166	1.03072		0.04	0.800966		0.128	0.98541		0.087	0.943249
	0.999434	1.07451		0.934934	0.858036		0.968121	1.05849		0.995951	1.04973		0.077	0.99289		0.025	0.847559		0.086	1.00972		0.1	0.973385
	1.08777	1.10803		0.960234	0.839028		0.957639	0.839656		0.959275	0.870881		0.205	0.940725		0.124	0.806945		0.044	0.809739		0.025	0.838418
	0.965846	0.840029		0.973113	1.09563		0.953851	0.867362		0.989605	0.882421		0.044	0.803214		0.027	1.03979		0.028	0.839778		0.038	0.823492
	0.932146	0.812446		0.974431	1.0025		0.950313	0.994671		0.954118	0.921466		0.036	0.804925		0.115	0.950116		0.042	0.966624		0.06	0.891912
	1.01115	0.964022		0.960087	0.830957		1.04422	1.35854		1.10428	1.19211		0.193	0.88047		0.025	0.799305		0.17	1.20151		0.223	0.996974
	1.06616	1.29694		0.947632	0.842965		0.940263	0.834508		1.12544	1.07678		0.268	1.12342		0.076	0.821514		0.068	0.819646		0.155	0.883587
	0.946417	0.81999		1.09387	0.82861		0.953349	1.01809		1.04858	1.06253		0.079	0.800149		0.087	0.699569		0.062	0.986229		0.189	0.9358
	0.941364	0.936011		1.15069	1.51269		1.03675	1.09686		0.976441	1.13891		0.021	0.918264		0.424	1.21405		0.214	0.977057		0.062	1.07718
	1.02726	1.19936		1.50931	1.11529		1.01675	1.01727		0.946113	0.855808		0.186	1.07824		0.103	0.682425		0.154	0.923987		0.066	0.835369
	1.01071	1.03574		0.973227	0.847748		0.990235	1.00035		1.00073	0.99795		0.146	0.946392		0.125	0.804447		0.093	0.932946		0.113	0.920955
	0.950467	0.897206		1.93003	0.94159		0.950827	0.938649		1.01976	1.07432		0.057	0.871766		0.772	0.450549		0.022	0.911689		0.184	0.972923
	1.02868	1.10281		0.975936	1.01248		1.17241	0.874262		0.99699	1.02914		0.156	0.990065		0.097	0.958095		0.216	0.688663		0.174	0.953301
	0.962294	1.01609		0.991122	0.969766		1.02113	1.25206		1.01435	1.00029		0.107	0.975148		0.031	0.903619		0.151	1.13237		0.099	0.91071
	0.980774	0.971796		1.09232	1.18685		0.964149	0.868582		1.06722	1.08961		0.134	0.915064		0.197	1.00344		0.093	0.831978		0.111	0.942892
	0.930542	0.818434		0.981655	0.874456		0.948749	0.850788		0.994731	1.00946		0.022	0.812255		0.186	0.822667		0.032	0.828161		0.253	0.937191
	0.962855	0.953405		0.965144	0.863173		1.0759	1.46008		0.944163	0.895257		0.153	0.914453		0.024	0.825945		0.164	1.25329		0.06	0.87568
	1.05428	1.18434		0.952601	0.989178		0.972465	1.08592		0.985057	0.959958		0.197	1.03745		0.048	0.958977		0.055	1.03126		0.056	0.899986
	1.06336	1.15785		0.96716	0.832474		0.943614	0.954906		1.05002	1.09745		0.178	1.00559		0.025	0.794909		0.044	0.934569		0.17	0.96523
	0.9295	0.847291		0.872059	0.874824		0.968005	0.920838		0.971246	0.963886		0.045	0.841837		0.068	0.926446		0.104	0.878518		0.06	0.916519
	0.9553	0.850271		1.15412	1.03429		0.973327	1.05229		1.17858	1.34375		0.057	0.821982		0.27	0.827629		0.104	0.998438		0.163	1.05294
	0.979633	1.20627		1.00981	1.00698		0.952208	0.954358		0.974737	0.990684		0.09	1.13718		0.102	0.920925		0.038	0.925603		0.037	0.938627
	0.971074	0.939732		0.893402	0.877045		0.937797	0.819705		0.94812	0.849779		0.077	0.89371		0.023	0.906609		0.03	0.807223		0.031	0.827728
	0.946044	0.843718		1.10868	0.831246		0.975175	1.03447		1.00497	1.00166		0.028	0.823628		0.115	0.69242		0.08	0.979668		0.049	0.92048
	0.961052	0.85465		1.4544	1.03787		0.954529	1.00329		1.09905	1.18481		0.073	0.82127		0.09	0.659031		0.061	0.970691		0.47	0.995579
	0.994229	0.901582		0.995959	1.03262		1.00387	0.977216		1.01855	0.997772		0.108	0.83746		0.069	0.957507		0.087	0.899001		0.08	0.904674
	0.963988	0.845629		1.02376	0.847783		0.974244	0.833982		1.01984	0.958904		0.043	0.810127		0.177	0.764773		0.034	0.790558		0.11	0.86834
	0.989779	0.980669		0.975462	0.869975		0.927525	0.832948		0.996369	0.946998		0.085	0.915017		0.034	0.823648		0.026	0.829348		0.081	0.877756
	0.981846	1.25289		0.976372	0.853235		0.984076	0.999719		0.974914	0.868218		0.049	1.17846		0.021	0.807045		0.07	0.938198		0.024	0.822446
	0.949851	0.891279		1.02254	1.11353		1.02771	1.46179		0.945497	0.887936		0.089	0.86657		0.143	1.0057		0.22	1.31359		0.057	0.867294
	1.28848	0.839083		0.955766	1.13859		0.956894	0.847697		1.06933	1.12468		0.365	0.601412		0.077	1.10017		0.043	0.818129		0.082	0.971323
	0.984764	0.849216		1.31772	0.867374		0.978371	0.967026		1.09766	1.29778		0.053	0.7964		0.628	0.607897		0.035	0.912808		0.215	1.09189
	1.08737	1.0089		1.56124	1.07142		1.02613	0.824862		1.00621	1.03863		0.083	0.856873		0.504	0.633778		0.155	0.742373		0.042	0.953267
	0.894595	0.823456		0.975802	0.811567		0.937277	0.841423		1.03731	1.16234		0.028	0.850078		0.021	0.768082		0.021	0.82907		0.248	1.03483
	0.975154	1.02021		0.996943	0.852777		1.36949	0.8794		1.0611	1.17738		0.223	0.966191		0.108	0.78997		0.286	0.593024		0.14	1.02472
	0.966825	0.996103		0.950957	0.857214		0.932353	0.8255		0.952569	0.900891		0.088	0.951483		0.047	0.832479		0.021	0.817677		0.043	0.873415
	1.05112	1.09459		1.04265	0.847253		0.947037	0.845027		0.989246	1.02981		0.218	0.961709		0.113	0.750445		0.044	0.82404		0.168	0.961384
	0.980214	0.831039		0.948128	0.892309		0.981665	1.03731		1.08466	1.11959		0.081	0.78297		0.092	0.869147		0.063	0.975865		0.172	0.953255
	1.00959	1.10734		0.979666	1.04964		1.00585	1.01573		0.983425	0.955554		0.244	1.01293		0.124	0.989482		0.149	0.932588		0.026	0.897344
	0.973281	0.96538		1.13884	0.907913		0.967473	1.02798		0.9785	1.01669		0.035	0.91602		0.437	0.73625		0.083	0.981274		0.082	0.959565
	0.983303	1.00262		0.990502	0.8275		1.11162	1.46251		1.01105	0.914691		0.098	0.941657		0.107	0.771539		0.375	1.21503		0.149	0.835499
	0.974194	0.880686		0.979595	0.870243		0.957106	0.842095		0.962884	0.868681		0.032	0.834873		0.071	0.820425		0.038	0.812542		0.027	0.833166
	0.966017	0.868934		0.972073	0.875183		0.978346	0.920393		1.04211	1.07145		0.054	0.830705		0.062	0.831466		0.053	0.868812		0.223	0.949526
	1.0541	1.06971		0.984669	0.894999		1.0067	0.979681		1.00381	0.985636		0.134	0.9372		0.026	0.839416		0.114	0.898731		0.068	0.906793
	0.97121	0.955993		0.994337	0.833704		0.933721	0.871378		1.05706	1.09363		0.093	0.909048		0.021	0.774325		0.035	0.861856		0.217	0.955465
	0.951062	0.884431		0.961433	0.873397		0.940472	0.84545		1.00291	1.03669		0.029	0.858816		0.072	0.838953		0.045	0.830209		0.143	0.954628
	1.02024	1.10566		1.00194	1.0233		0.941096	0.894447		1.06157	1.1439		0.188	1.00084		0.147	0.943208		0.062	0.877739		0.136	0.995141
	1.02491	1.13128		0.963771	0.909082		0.978674	1.08448		0.999695	1.04242		0.167	1.01936		0.072	0.871111		0.112	1.02336		0.125	0.96299
	0.973049	1.10597		2.13934	1.07535		0.948841	0.879208		0.986442	1.05866		0.073	1.04967		0.443	0.464209		0.12	0.855742		0.116	0.991126
	0.974647	0.996487		0.971501	1.0454		0.954754	0.847395		0.953834	1.02268		0.077	0.944211		0.13	0.99377		0.138	0.81967		0.053	0.990176
	0.955113	1.02288		0.968756	0.958375		0.981031	1.03262		0.985314	0.973535		0.054	0.989039		0.051	0.913621		0.034	0.972082		0.083	0.912476
	0.914602	0.817899		1.0154	0.957489		0.950445	1.07204		0.974933	0.861213		0.067	0.825872		0.172	0.870844		0.022	1.04167		0.02	0.815795
	1.03982	1.10204		1.0422	1.03818		1.01337	1.16857		0.947089	0.9479		0.26	0.978784		0.088	0.919947		0.039	1.06495		0.051	0.924308
	0.992827	0.987094		0.936889	0.851533		0.955926	0.964821		1.00402	0.942797		0.098	0.918184		0.056	0.839379		0.034	0.93211		0.113	0.867198
	0.99275	1.15941		0.975544	0.901661		0.944267	0.814212		1.03703	1.00019		0.096	1.07855		0.029	0.853574		0.024	0.79632		0.2	0.890716
	0.974928	0.888295		2.38604	1.07448		0.956825	0.966718		1.00923	0.965161		0.044	0.841453		0.543	0.415877		0.039	0.933065		0.128	0.883194
	1.11126	1.49707		1.15696	0.89529		1.01562	1.10606		0.989751	0.884757		0.235	1.24414		0.042	0.714644		0.162	1.00575		0.02	0.82555
	0.947196	0.906698		0.998983	1.1621		0.965541	0.966782		1.02935	1.10773		0.107	0.884032		0.193	1.07431		0.038	0.924704		0.192	0.993839
	0.931171	0.842807		1.00286	0.826306		0.963439	0.968904		0.998748	1.02157		0.027	0.835879		0.117	0.760929		0.045	0.928756		0.2	0.944624
	0.964626	1.12793		1.0057	1.06405		0.946015	0.834217		1.07937	1.07895		0.136	1.07987		0.121	0.977096		0.022	0.814378		0.242	0.923153
	1.0944	1.21071		0.994745	0.96919		0.951505	0.913266		1.03346	1.12603		0.229	1.02166		0.091	0.899792		0.067	0.886403		0.284	1.00624
	0.950989	0.900509		1.0094	0.975561		1.00234	1.07365		1.00513	1.0242		0.103	0.874494		0.079	0.892561		0.148	0.989215		0.251	0.941032
	1.1439	1.35955		1.19795	0.900987		0.997259	1.01718		0.930062	0.8983		0.244	1.09762		0.282	0.694582		0.074	0.941965		0.034	0.891979
	0.952111	0.998912		1.00967	0.985131		0.978634	1.02321		1.14139	1.24173		0.088	0.968913		0.139	0.901076		0.115	0.965582		0.261	1.00471
	1.01656	1.05032		1.24195	0.835844		0.992699	1.19813		1.11018	1.24165		0.161	0.954189		0.098	0.621533		0.131	1.11463		0.16	1.03288
	0.992559	1.13787		0.929769	0.920505		0.957231	0.933837		1.00229	0.921721		0.178	1.05872		0.099	0.914315		0.042	0.900947		0.152	0.849278
	0.979183	0.868675		1.15431	0.88891		0.960118	0.96426		1.00894	0.901858		0.02	0.819291		0.026	0.711184		0.096	0.927501		0.108	0.825502
	0.964324	0.862012		0.995446	1.11849		0.965989	1.03401		1.26774	0.824208		0.083	0.825535		0.086	1.03767		0.126	0.988548		0.438	0.600413
	1.10281	1.27227		0.974754	0.94938		0.943185	0.977947		0.996309	0.996739		0.214	1.06543		0.091	0.899477		0.064	0.957554		0.02	0.923916
	1.13377	1.45273		0.992746	0.869196		0.989256	1.26052		0.969285	1.06455		0.17	1.18333		0.043	0.808582		0.096	1.17676		0.095	1.01428
	0.969311	0.928887		1.00326	0.866891		0.979977	1.13365		0.974408	0.975154		0.077	0.885002		0.027	0.797991		0.07	1.06834		0.08	0.924224
	0.941338	0.833028		0.978885	0.882648		1.01725	0.997121		1.01259	1.06359		0.023	0.817258		0.13	0.832723		0.133	0.905247		0.189	0.970032
	1.02123	1.0636		1.01512	1.0683		0.951811	0.976697		1.004	1.02436		0.174	0.961839		0.155	0.971891		0.12	0.947663		0.114	0.942244
	1.10902	1.39805		0.994047	0.826057		0.980689	0.989818		1.02027	1.01042		0.306	1.1642		0.129	0.767447		0.152	0.932114		0.038	0.914605
	1.04701	1.18269		0.997021	0.979918		0.979012	0.895994		1.03253	0.984635		0.167	1.0432		0.122	0.907674		0.072	0.845205		0.104	0.880681
	0.951584	0.904283		0.946682	0.865753		0.964355	0.955027		0.971317	0.878179		0.037	0.877612		0.052	0.844568		0.035	0.914584		0.053	0.834963
	0.955531	0.920852		0.961298	0.812633		0.954798	1.01706		0.971347	0.997048		0.036	0.89		0.028	0.780695		0.057	0.983736		0.064	0.947952
	0.99115	1.15858		1.17795	0.903077		1.02202	1.30219		1.0152	1.06582		0.152	1.07952		0.108	0.708015		0.134	1.17669		0.192	0.969563
	0.946589	0.838955		0.955132	0.925283		0.963298	0.827017		1.02517	1.15998		0.028	0.818506		0.055	0.894656		0.086	0.792865		0.099	1.04497
	1.06543	1.25225		0.990854	0.900742		0.989254	0.917276		1.02458	1.0998		0.098	1.08546		0.028	0.839529		0.115	0.856322		0.127	0.99132
	0.978503	1.01179		1.24974	0.843331		0.962178	0.942471		1.03766	1.01783		0.116	0.954934		0.07	0.623192		0.06	0.904602		0.142	0.905869
	1.14442	1.48415		0.952697	0.934451		1.02102	1.2186		1.04237	1.08189		0.231	1.19767		0.024	0.90583		0.143	1.10223		0.145	0.958532
	0.960769	0.914283		0.962782	1.06504		0.965513	0.854343		1.07688	1.12951		0.022	0.878833		0.046	1.02161		0.03	0.817182		0.291	0.968652
	1.05372	1.34274		0.990792	1.08581		0.965043	0.859321		1.02373	1.12176		0.269	1.17682		0.063	1.01208		0.073	0.822345		0.111	1.01195
	1.01903	1.15346		1.00094	1.07105		0.94741	0.81215		1.04471	1.1199		0.112	1.04535		0.216	0.988205		0.022	0.791669		0.121	0.989986
	0.973046	1.12494		2.08171	1.23123		0.93906	0.89831		0.997423	1.14606		0.089	1.06768		0.588	0.546214		0.067	0.883442		0.081	1.06114
	0.943931	0.85676		1.00538	1.1038		1.06924	1.53895		1.03751	1.03941		0.068	0.838231		0.116	1.01392		0.25	1.32921		0.157	0.925209
	1.06726	1.13474		0.96539	1.11044		0.95857	0.990956		1.02165	0.939305		0.195	0.98191		0.03	1.06228		0.102	0.954719		0.022	0.849078
	0.955561	0.87274		0.97924	0.840139		0.952483	0.8539		0.98419	0.967215		0.054	0.843473		0.083	0.792331		0.023	0.827933		0.248	0.907588
	0.957186	0.820907		0.959041	0.85504		0.953018	0.921963		0.993547	0.923178		0.044	0.792032		0.06	0.823368		0.078	0.893423		0.041	0.858108
	1.09318	1.28104		0.981008	0.903005		0.953668	0.896656		0.996285	1.01811		0.366	1.08222		0.083	0.850086		0.06	0.868308		0.086	0.943747
	1.0041	1.02626		1.20802	0.860172		0.972007	0.958134		1.02658	1.02093		0.147	0.943904		0.324	0.657591		0.041	0.910336		0.118	0.918434
	0.960695	0.953819		1.05033	1.11542		0.973668	0.836475		0.973147	1.09955		0.045	0.916907		0.205	0.980751		0.026	0.79339		0.081	1.04347
	1.13274	1.49771		0.94886	0.868307		0.969568	1.08596		0.98701	1.02889		0.248	1.22107		0.046	0.845115		0.079	1.03438		0.122	0.962701
	0.942186	0.908415		1.00248	0.98193		0.957373	0.840796		1.04404	1.05105		0.149	0.890415		0.091	0.904583		0.034	0.811063		0.213	0.929714
	1.05778	0.954746		0.965721	0.868946		1.01174	1.22336		1.00634	1.02317		0.196	0.83356		0.037	0.83097		0.105	1.11669		0.074	0.938966
	1.00402	1.15531		0.957565	0.831165		0.962143	0.94625		1.00517	0.936801		0.079	1.06267		0.087	0.801611		0.101	0.908262		0.042	0.860706
	0.971877	0.945972		1.11086	0.846867		0.998364	1.14523		1.0829	1.17664		0.034	0.898901		0.108	0.704047		0.154	1.05937		0.15	1.00345
	1.03178	1.06245		1.01422	1.11465		1.07505	1.28305		1.04483	1.08873		0.122	0.950972		0.163	1.01496		0.373	1.1022		0.138	0.962323
	1.0555	1.03947		1.00011	1.09101		0.956462	0.896027		0.975832	0.957924		0.028	0.909485		0.081	1.00746		0.089	0.865164		0.096	0.906569
	0.954317	1.03974		1.01566	1.19025		0.935346	0.820268		0.926393	0.841681		0.14	1.00618		0.114	1.08227		0.032	0.809895		0.054	0.839068
	0.944998	0.87001		0.972898	0.830326		0.959002	0.848678		1.03508	1.09512		0.058	0.850234		0.049	0.788182		0.02	0.817275		0.31	0.977082
	0.944429	0.926168		1.66653	0.912933		1.01496	1.10351		1.03517	1.05496		0.095	0.90566		0.454	0.505907		0.115	1.00409		0.112	0.941176
	0.990412	1.05881		0.946938	0.853551		0.973733	0.928216		1.05812	1.06631		0.102	0.987297		0.025	0.83244		0.029	0.880348		0.194	0.930665
	0.947671	0.828442		0.953147	0.841779		0.960855	0.903909		1.0115	1.00283		0.02	0.807327		0.085	0.815611		0.057	0.868784		0.166	0.915604
	1.00568	0.933343		0.958624	0.834274		0.942819	0.808809		1.07711	1.0241		0.154	0.857089		0.047	0.803721		0.021	0.792251		0.131	0.878064
	1.074	1.07384		0.967684	0.98823		0.927241	0.819133		1.04393	1.15431		0.222	0.923381		0.075	0.943126		0.048	0.815843		0.108	1.02116
	0.95348	0.93519		1.03948	0.855145		1.00423	1.23939		0.929355	0.885152		0.04	0.905802		0.199	0.759748		0.12	1.13978		0.085	0.879592
	0.960772	0.849644		0.951501	0.932559		0.951692	0.838445		1.11903	1.14352		0.026	0.816698		0.035	0.905133		0.027	0.813623		0.193	0.943733
	0.990398	1.05745		0.946829	0.838604		0.967673	1.00276		1.01319	1.08529		0.021	0.986042		0.022	0.817957		0.078	0.957002		0.033	0.989239
	0.974533	0.842605		1.01728	1.00688		0.940913	0.817509		1.02988	1.05627		0.047	0.798495		0.072	0.914071		0.044	0.802395		0.12	0.947186
	0.965933	0.970371		0.992417	0.850184		1.00461	1.00072		0.981643	0.886067		0.068	0.92776		0.027	0.791159		0.193	0.919941		0.083	0.8336
	0.99261	0.963569		1.01209	0.827954		0.980937	0.984837		1.03193	1.12115		0.125	0.896497		0.112	0.755492		0.164	0.927188		0.108	1.00337
	0.985099	0.964747		0.9813	0.903085		0.970989	0.947585		1.02148	1.01999		0.113	0.904437		0.028	0.849908		0.087	0.901257		0.118	0.922164
	0.998175	1.06932		0.987792	0.928543		1.04804	1.10811		1.09064	1.25527		0.083	0.989339		0.041	0.868124		0.157	0.976453		0.155	1.06292
	0.93836	0.865018		0.960711	0.847677		0.999397	1.08087		0.967139	0.874229		0.029	0.851335		0.056	0.814858		0.124	0.998803		0.074	0.834798
	0.98492	0.859294		1.00539	0.833244		0.943641	0.8368		0.951484	0.838599		0.02	0.805723		0.061	0.76539		0.121	0.818954		0.068	0.81395
	1.10136	1.1551		1.07172	1.0141		0.939204	1.09119		1.7805	0.979003		0.232	0.968574		0.162	0.873868		0.079	1.07297		0.604	0.507794
	0.956994	1.01572		1.3071	0.862973		1.04017	0.826381		0.986947	0.976879		0.109	0.980194		0.275	0.609724		0.21	0.733702		0.037	0.914096
	1.00867	1.0496		1.07682	0.825937		0.91843	0.837239		1.02913	1.03043		0.138	0.960991		0.12	0.708354		0.028	0.841876		0.3	0.924688
	0.963571	0.9247		0.954589	0.897184		0.957233	0.941824		0.934348	0.878474		0.111	0.886262		0.025	0.86798		0.063	0.908651		0.039	0.86829
	1.00755	0.98952		1.11706	0.935024		0.983054	1.09844		0.999751	1.14237		0.119	0.906994		0.147	0.773018		0.081	1.03192		0.072	1.05526
	1.04063	1.19952		1.07885	1.14815		0.940825	0.860596		1.05442	1.09549		0.172	1.06453		0.176	0.982838		0.02	0.844764		0.222	0.95949
	0.951507	1.03906		0.995055	0.914812		0.987215	0.888322		0.999242	1.00177		0.044	1.0085		0.021	0.849042		0.099	0.831005		0.073	0.925852
	0.942787	0.922454		1.00154	0.975292		0.968186	0.985972		1.06228	1.06527		0.027	0.9036		0.118	0.899317		0.05	0.940483		0.301	0.926124
	0.995982	1.12409		1.03569	0.847516		0.949836	0.839171		0.952845	0.936351		0.099	1.04231		0.291	0.755726		0.077	0.815919		0.028	0.907531
	0.959186	0.953662		0.994024	0.952738		0.983719	0.99551		1.01215	1.12428		0.057	0.918198		0.153	0.88516		0.107	0.934586		0.087	1.02583
	0.961911	0.849194		1.03112	1.00338		0.973952	0.976531		0.990838	1.06634		0.03	0.8153		0.141	0.898676		0.092	0.925963		0.023	0.993891
	0.932155	0.932794		0.991344	0.983223		0.970585	0.94456		0.92737	0.840419		0.085	0.924151		0.024	0.915952		0.073	0.898754		0.025	0.836928
	1.35737	0.833748		0.991426	0.826987		1.10111	0.829722		0.974274	1.00702		0.047	0.567257		0.12	0.770341		0.222	0.695897		0.07	0.954558
	0.975506	0.935982		1.03013	0.902992		0.942733	0.854568		0.917212	0.905485		0.041	0.8861		0.054	0.809535		0.04	0.837149		0.026	0.911709
	0.988479	1.04848		0.982848	0.936568		0.931143	0.834537		0.951651	0.864826		0.14	0.979571		0.022	0.88003		0.038	0.827703		0.087	0.839259
	0.947475	0.977261		1.02367	1.05619		0.931409	0.825084		0.995806	1.00546		0.131	0.952549		0.166	0.952865		0.026	0.818093		0.034	0.932474
	1.20142	1.47664		0.95782	1.0099		0.954527	0.86881		0.991828	0.944253		0.251	1.13508		0.02	0.973731		0.067	0.840584		0.054	0.879219
	0.972123	0.991321		0.944303	0.854881		0.979103	0.993655		1.0303	1.05558		0.116	0.941755		0.033	0.836063		0.132	0.937243		0.154	0.946179
	0.942458	0.857785		0.953305	0.873818		0.954054	1.07226		1.81649	0.850049		0.03	0.840546		0.041	0.846514		0.048	1.03794		0.903	0.432171
	0.880397	0.8161		1.68324	0.946674		1.02161	0.842472		1.01656	1.01329		0.099	0.85607		0.733	0.519398		0.134	0.76158		0.149	0.920548
	1.01894	1.10705		0.978086	0.835354		0.963523	1.02923		0.946233	0.945382		0.152	1.00338		0.029	0.788748		0.102	0.986495		0.085	0.922686
	1.06524	1.22083		1.01386	0.984369		0.948001	0.831002		0.970411	0.906885		0.188	1.05841		0.19	0.89665		0.053	0.809539		0.054	0.86306
	0.965049	0.84051		0.944378	0.856297		0.995356	0.912524		1.0154	1.07891		0.053	0.804337		0.033	0.837382		0.17	0.846664		0.252	0.981274
	0.967245	0.909711		0.95798	1.00603		0.965993	0.879789		1.03867	1.05211		0.109	0.868584		0.065	0.969836		0.068	0.841104		0.13	0.93546
	0.932376	0.833284		1.04273	0.83964		0.994706	1.04086		0.942708	1.0329		0.05	0.825367		0.05	0.743644		0.076	0.966364		0.101	1.01187
	0.959428	0.896096		0.957656	0.835312		0.980419	1.02421		1.00681	0.976609		0.034	0.862555		0.038	0.805534		0.072	0.96477		0.128	0.895813
	0.981303	0.922391		0.985963	0.820869		0.979638	0.940754		1.05317	1.06901		0.122	0.868074		0.02	0.768879		0.078	0.886861		0.151	0.937412
	0.984115	1.01144		0.969846	1.05682		1.0218	1.00476		1.07435	1.08557		0.128	0.94916		0.026	1.00633		0.209	0.908119		0.138	0.933161
	1.01921	1.14246		1.01186	1.0908		0.958521	0.912549		1.04487	0.997186		0.12	1.0352		0.116	0.995569		0.055	0.879224		0.173	0.881372
	1.01642	0.991446		1.01355	1.1597		0.946665	0.873679		0.957097	0.863334		0.137	0.900826		0.021	1.05668		0.045	0.852315		0.042	0.833044
	0.970418	0.891912		1.02404	0.979486		0.943422	0.856605		0.97684	1.02219		0.059	0.848806		0.11	0.883337		0.033	0.838532		0.048	0.966394
	0.980942	1.05482		0.905774	0.852384		0.990934	0.991163		0.974133	0.9965		0.023	0.993071		0.034	0.86908		0.187	0.92373		0.026	0.944721
	0.969853	0.931468		0.95759	0.923956		0.964076	1.05442		1.03909	1.09923		0.035	0.886966		0.052	0.891079		0.091	1.01006		0.125	0.976969
	0.981753	0.910732		0.963558	0.911937		0.942461	0.820849		0.992227	1.07149		0.077	0.856709		0.039	0.874041		0.034	0.804349		0.077	0.997289
	1.02547	1.03893		1.06534	0.857933		0.974838	0.948468		0.962409	0.96475		0.209	0.935634		0.165	0.743723		0.046	0.898536		0.02	0.925764
	0.948455	0.865827		0.97544	1.13095		0.942431	1.00774		0.968561	0.915347		0.049	0.843062		0.107	1.07075		0.13	0.987518		0.073	0.872778
	0.9647	0.933857		0.954278	0.835552		0.944234	0.841462		0.984939	1.00364		0.083	0.893991		0.056	0.808619		0.044	0.823		0.138	0.941053
	0.936132	0.836039		1.00859	1.06089		0.936577	0.816813		1.01971	1.13912		0.047	0.824773		0.025	0.971405		0.037	0.805424		0.083	1.03167
	0.964405	0.820741		0.929886	0.976388		0.951853	0.864831		1.02386	1.00509		0.054	0.785944		0.023	0.969701		0.027	0.839085		0.132	0.906586
	0.926593	0.835261		0.962665	1.10308		0.967835	0.980862		0.981757	0.861263		0.028	0.832488		0.057	1.05823		0.083	0.935948		0.03	0.810171
	1.06875	1.19023		0.97092	0.858925		0.953375	0.97254		0.989938	0.967155		0.211	1.02849		0.035	0.81699		0.069	0.942083		0.1	0.902263
	0.991814	0.951673		1.01597	1.0421		0.95246	0.819488		1.01833	1.10747		0.103	0.88614		0.054	0.947273		0.055	0.794586		0.133	1.00436
	0.950733	0.849083		1.08696	0.880563		0.970286	1.05159		0.946889	0.921253		0.02	0.824777		0.26	0.748153		0.044	1.0009		0.067	0.898514
	1.00299	0.935743		0.985928	1.03961		0.971183	1.16391		0.995246	1.08352		0.055	0.861597		0.097	0.973797		0.029	1.10679		0.079	1.00542
	0.980127	0.896972		0.98638	1.03933		0.953258	1.06162		1.01073	1.01231		0.05	0.845165		0.129	0.973088		0.034	1.0285		0.123	0.924961
	1.00815	1.02799		1.00266	0.83628		1.02159	1.10543		0.96346	0.833072		0.119	0.941697		0.233	0.770266		0.14	0.999307		0.138	0.798534
	0.963057	0.964264		0.982322	0.97682		0.953824	0.85553		0.996647	0.965146		0.051	0.924674		0.091	0.918344		0.029	0.828346		0.163	0.894328
	0.95133	0.84468		1.03447	1.10692		0.964156	0.920362		1.10563	1.14489		0.03	0.819985		0.154	0.9882		0.053	0.881568		0.271	0.95631
	0.97656	0.864955		0.940327	0.86681		0.952342	0.867291		1.06781	1.03597		0.081	0.817974		0.038	0.851314		0.043	0.841041		0.049	0.895978
	0.953341	0.988381		1.2044	0.856775		0.953269	0.81959		0.984205	1.05736		0.067	0.957461		0.234	0.656962		0.048	0.794011		0.059	0.992159
	1.02752	1.07048		1.05505	0.850036		0.955045	1.02353		1.06941	1.10076		0.309	0.962129		0.148	0.744064		0.092	0.989743		0.235	0.950587
	1.09186	1.31263		0.992783	0.890953		0.96146	0.909291		1.01327	1.09211		0.225	1.11024		0.03	0.828792		0.045	0.873408		0.064	0.995375
	1.02762	1.14952		0.95225	0.856018		0.981983	0.910294		0.960257	0.893181		0.244	1.03307		0.022	0.830189		0.113	0.856096		0.045	0.859008
	1.14879	1.49416		0.999837	0.9916		1.02326	1.08989		0.979064	0.993976		0.195	1.20116		0.062	0.915909		0.145	0.983647		0.089	0.937583
	0.960327	0.840879		0.971143	0.945898		0.9681	1.05794		0.978465	0.917859		0.051	0.808647		0.06	0.89951		0.05	1.00922		0.055	0.866315
	0.931158	0.826828		0.973446	0.898336		0.961285	0.834663		0.940161	0.835339		0.042	0.820043		0.037	0.85226		0.04	0.80187		0.023	0.820551
	0.97788	0.836104		1.09221	0.90295		0.943903	0.831827		0.943307	0.94612		0.138	0.789622		0.453	0.76349		0.041	0.813862		0.03	0.926271
	1.00067	0.901209		1.13677	0.859831		0.953979	0.878806		1.03262	1.01705		0.03	0.831723		0.203	0.698533		0.034	0.850745		0.059	0.909588
	1.04771	1.22323		0.979268	0.832212		0.954588	0.840518		1.06609	1.076		0.203	1.07822		0.049	0.784833		0.035	0.81316		0.181	0.932095
	1.01868	1.01333		0.943111	0.878863		1.03034	1.02966		0.958306	0.94717		0.085	0.918664		0.059	0.860604		0.174	0.922907		0.037	0.912785
	1.02426	0.849598		1.01509	1.02454		0.995919	1.03936		0.993476	1.05191		0.051	0.766036		0.106	0.932117		0.142	0.963801		0.052	0.977841
	0.994398	1.03096		0.969441	0.829436		0.933153	0.817156		1.01836	1.06396		0.083	0.957472		0.038	0.790144		0.026	0.808718		0.126	0.964871
	0.983778	0.850299		0.978483	0.927368		0.949966	0.818219		1.03288	1.05296		0.069	0.798214		0.073	0.875273		0.027	0.795438		0.111	0.941473
	1.16642	1.52017		0.963194	0.847843		1.01821	1.00243		0.973916	1.04568		0.248	1.2036		0.179	0.812918		0.171	0.909203		0.069	0.991572
	0.965155	0.853888		0.970474	0.833722		0.97378	0.916627		0.956708	0.98945		0.078	0.817051		0.044	0.793382		0.066	0.869315		0.056	0.955124
	0.947896	0.852964		1.02686	1.08624		0.982402	1.03295		1.0802	1.13791		0.029	0.831026		0.15	0.976918		0.101	0.971033		0.221	0.97286
	0.995837	0.97917		1.00484	0.915743		0.9082	0.845028		1.0117	1.04914		0.185	0.908061		0.109	0.841628		0.025	0.85928		0.081	0.957695
	0.958763	0.886036		0.987351	0.88718		0.9783	0.914061		0.967709	0.947992		0.034	0.853464		0.077	0.829822		0.07	0.862875		0.032	0.904701
	1.01599	1.10563		0.972825	0.893029		0.939386	0.816774		0.908299	0.850398		0.198	1.005		0.033	0.847765		0.03	0.802976		0.027	0.864646
	1.03222	1.22267		0.967504	0.962204		0.929143	0.813409		0.983262	0.989286		0.21	1.09391		0.068	0.918459		0.021	0.808484		0.136	0.929175
	1.0232	1.0989		0.967051	0.906484		0.964135	0.834542		1.01978	0.973467		0.106	0.991847		0.045	0.865677		0.022	0.799383		0.145	0.881571
	0.979717	0.869854		1.03532	1.05686		0.947875	0.820116		1.00752	1.09492		0.021	0.819956		0.087	0.942728		0.044	0.799041		0.086	1.00363
	0.977481	0.902321		0.982804	0.960907		0.963851	0.873689		1.00639	0.938334		0.025	0.852507		0.024	0.902941		0.041	0.837129		0.075	0.861064
	0.954436	0.851237		0.962569	0.859669		0.998302	0.989876		1.01622	1.07675		0.057	0.823662		0.034	0.824792		0.17	0.915722		0.109	0.978529
	0.989829	1.17464		0.966998	0.827113		0.955578	0.847868		0.92593	0.869654		0.083	1.09595		0.025	0.789921		0.034	0.819422		0.066	0.867388
	0.943488	0.817529		0.953349	0.858353		0.957057	1.03243		0.989874	1.06427		0.029	0.800225		0.025	0.831494		0.044	0.996253		0.148	0.992922
	0.939227	0.856779		0.994502	1.0355		0.979961	1.07692		0.95461	0.825355		0.058	0.842449		0.08	0.961586		0.073	1.01489		0.079	0.798472
	0.947066	0.87259		1.0837	1.15763		0.996783	1.11688		1.01197	1.02023		0.045	0.850893		0.17	0.98652		0.065	1.03479		0.179	0.931057
	1.01191	1.069		0.982883	0.938589		0.932192	0.815374		1.00585	1.15493		0.157	0.975622		0.078	0.881899		0.029	0.807786		0.09	1.0604
	0.938991	0.842514		0.987721	0.959222		0.973642	0.843978		1.02886	1.14615		0.051	0.828629		0.148	0.896871		0.064	0.800528		0.109	1.0288
	0.940179	0.896293		1.06694	0.861725		0.960029	0.812977		0.968218	0.971665		0.031	0.880409		0.128	0.745888		0.098	0.782058		0.072	0.926805
	1.03933	1.25619		0.980501	0.993985		1.02545	1.13881		0.95374	0.928266		0.138	1.11621		0.06	0.936218		0.186	1.02561		0.027	0.898851
	0.995961	1.02877		1.24404	0.85523		0.96146	0.979411		1.04008	1.06209		0.193	0.953943		0.297	0.634881		0.087	0.94076		0.05	0.943058
	0.917005	0.835017		0.943489	0.820052		0.972679	0.952037		1.02985	1.06414		0.04	0.840946		0.024	0.802693		0.056	0.903919		0.104	0.954269
	0.923738	0.811539		1.03889	0.996556		0.968474	1.00523		1.06263	1.07634		0.052	0.811345		0.13	0.885881		0.188	0.95857		0.099	0.935433
	0.958565	0.882981		1.03155	1.06775		0.930341	0.850315		0.988928	1.04245		0.037	0.850696		0.121	0.955929		0.03	0.844078		0.09	0.9735
	0.961189	0.991921		1.00333	0.934426		0.96374	0.928301		1.04686	1.14263		0.065	0.953045		0.08	0.860095		0.045	0.889557		0.192	1.008
	0.943537	0.84681		0.9745	0.924771		0.985237	0.887677		1.03518	1.05991		0.061	0.828843		0.083	0.876389		0.187	0.832069		0.24	0.945571
	0.99375	0.990496		1.01808	1.0084		0.973832	0.885988		0.999331	1.06255		0.09	0.920492		0.087	0.91474		0.048	0.840212		0.156	0.981935
	0.933123	0.884633		0.97919	0.903117		0.949733	0.818454		0.961649	0.944369		0.057	0.875527		0.032	0.851769		0.063	0.795862		0.107	0.906923
	1.05281	1.17312		1.00791	0.849637		0.937469	0.816874		1.02454	1.11393		0.151	1.02906		0.113	0.778497		0.021	0.804717		0.148	1.0041
	0.958885	0.834385		1.00962	0.858779		0.988949	1.09316		1.01342	1.11492		0.022	0.803609		0.074	0.785538		0.165	1.02083		0.137	1.01601
	0.939196	0.82846		0.991925	0.88967		0.914484	0.935043		1.00898	0.970848		0.024	0.81463		0.024	0.828315		0.023	0.94428		0.099	0.888611
	0.971585	0.906406		0.97296	0.852287		1.0136	1.12469		1.00146	0.987051		0.089	0.861562		0.037	0.808976		0.139	1.02473		0.138	0.910227
	0.937429	1.08855		0.973222	0.839595		1.00941	1.02534		1.0027	1.04988		0.058	1.07239		0.022	0.796715		0.157	0.938094		0.291	0.966978
	1.00357	0.935713		0.96879	0.997036		0.949783	0.855639		1.06156	1.07364		0.11	0.861074		0.179	0.950443		0.069	0.831976		0.174	0.934026
	1.03523	1.12808		1.03633	0.875423		0.951454	0.836911		1.03734	1.08649		0.117	1.00634		0.309	0.780128		0.028	0.812338		0.129	0.967274
	0.929096	0.835963		1.00507	1.07278		0.974918	0.910646		1.06289	1.10056		0.032	0.830943		0.158	0.985733		0.032	0.862634		0.281	0.956249
	1.03445	0.869751		0.987113	1.07901		0.888347	0.906792		1.04415	1.15639		0.207	0.776483		0.041	1.00949		0.062	0.942693		0.17	1.02279
	1.02923	1.0872		1.01524	0.92682		1.03323	1.0104		1.07895	1.10018		0.177	0.975535		0.105	0.843089		0.256	0.903112		0.228	0.941695
	1.00125	1.03739		1.12726	0.856072		0.9674	0.820792		0.955826	0.850849		0.128	0.956848		0.241	0.701342		0.045	0.783559		0.049	0.822089
	1.07419	1.1693		0.963406	0.840512		0.955799	0.844502		0.997678	1.05171		0.23	1.00529		0.033	0.805711		0.021	0.815979		0.122	0.973529
	1.04948	1.39867		0.984305	0.88539		0.940048	0.825088		0.99289	1.00055		0.242	1.2308		0.045	0.830711		0.049	0.810578		0.077	0.930645
	0.954544	0.943191		0.959711	0.846592		0.984773	0.979067		1.02651	0.995755		0.034	0.912534		0.027	0.814664		0.023	0.918166		0.117	0.895849
	0.955986	0.947788		0.991755	0.900416		0.929625	0.818488		0.991003	0.911399		0.047	0.915597		0.066	0.838463		0.021	0.813111		0.036	0.849334
	0.985924	1.03553		1.05186	1.05667		0.94268	0.85926		0.889939	0.837029		0.186	0.96998		0.038	0.927742		0.029	0.841793		0.033	0.868611
	1.12089	1.17931		0.993066	0.884672		1.01312	1.00693		1.07963	1.13981		0.254	0.971654		0.047	0.822714		0.28	0.917873		0.156	0.974989
	1.11325	1.28285		1.00101	1.06222		0.97208	0.995084		1.07664	1.0707		0.301	1.06421		0.05	0.97999		0.173	0.945372		0.273	0.918425
	0.927497	0.953593		0.99748	1.04724		0.976977	0.933131		0.98119	1.04668		0.053	0.949501		0.158	0.96959		0.036	0.88207		0.088	0.985159
	0.962004	0.868764		0.996134	0.88088		0.982727	1.03422		0.962289	0.871149		0.053	0.834007		0.031	0.816665		0.111	0.971903		0.042	0.836049
	0.936422	0.840339		0.984989	0.824429		0.984182	0.993675		1.04404	1.20319		0.06	0.828758		0.058	0.772977		0.035	0.932425		0.095	1.0643
	1.0097	0.982105		0.994581	0.903015		0.962575	0.85686		0.99015	0.987663		0.02	0.898274		0.068	0.838494		0.073	0.822092		0.086	0.921198
	0.958798	0.961745		0.954507	0.909955		0.99496	1.02672		0.950567	0.816934		0.148	0.926356		0.037	0.880412		0.179	0.952995		0.052	0.793686
	1.01657	0.949579		0.978101	0.826793		0.949923	0.941672		0.996965	1.05149		0.202	0.862656		0.021	0.780653		0.044	0.915496		0.074	0.974028
	1.10013	1.06585		1.08233	1.10569		0.97246	0.834801		1.02037	1.0106		0.266	0.894746		0.254	0.943447		0.051	0.792787		0.082	0.914671
	0.97002	0.827841		0.975136	0.841245		0.933077	0.812558		1.07247	1.13404		0.054	0.788154		0.103	0.796714		0.034	0.804233		0.148	0.976531
	1.06363	1.49081		0.963612	0.898812		0.995541	1.04173		1.00237	1.06044		0.135	1.29442		0.062	0.861413		0.113	0.966365		0.212	0.977025
	0.973014	0.917181		1.02726	1.0695		0.961611	0.825783		0.96893	0.903555		0.059	0.870524		0.093	0.96149		0.083	0.79307		0.15	0.861206
	0.957869	1.03153		1.25624	0.867477		0.95855	0.874148		0.99793	1.04036		0.07	0.994539		0.237	0.637719		0.079	0.8422		0.042	0.962787
	0.992049	0.898623		0.943822	0.936829		0.946666	0.972143		0.976734	0.86879		0.083	0.836545		0.044	0.916675		0.057	0.948371		0.032	0.821454
	0.981358	0.919976		0.981299	0.998587		0.932717	0.986162		0.988277	0.833851		0.026	0.865752		0.084	0.939787		0.029	0.976436		0.091	0.779211
	1.06843	1.39447		0.983991	0.880311		0.908333	0.811013		0.948259	0.88843		0.187	1.20533		0.076	0.826209		0.022	0.82457		0.116	0.865249
	1.01543	1.04535		1.00212	1.03743		0.96156	0.934398		1.05984	1.1656		0.16	0.950729		0.155	0.956053		0.046	0.89743		0.204	1.01567
	1.2629	1.44621		1.00043	1.01481		0.966429	0.827241		0.962234	1.00366		0.288	1.05757		0.049	0.936792		0.054	0.790509		0.036	0.96328
	1.1129	1.31587		0.953467	0.935438		1.02973	1.13037		0.978813	0.958384		0.214	1.09195		0.033	0.906055		0.162	1.01378		0.061	0.904242
	1.02905	1.14592		0.971268	0.857348		0.964817	0.826589		1.02108	0.996784		0.194	1.0284		0.044	0.815199		0.042	0.791206		0.073	0.901546
	0.983669	0.847609		1.01107	1.01425		0.955362	0.965018		0.981504	0.955991		0.099	0.795777		0.136	0.926419		0.041	0.932852		0.179	0.899511
	0.978023	0.872736		0.975184	0.858967		0.956967	0.872587		1.0418	1.08168		0.06	0.824097		0.047	0.813457		0.026	0.842086		0.2	0.958869
	1.03135	1.08619		1.02514	0.847288		0.952196	0.88362		0.96543	1.01595		0.202	0.972628		0.037	0.763295		0.066	0.857006		0.076	0.97184
	0.952014	0.997072		0.951679	0.835341		0.916175	0.811581		0.943762	0.903977		0.061	0.967226		0.029	0.810622		0.036	0.818085		0.028	0.884586
	0.957053	0.88077		0.991682	0.868733		0.969529	0.875666		1.03655	0.988995		0.035	0.849907		0.068	0.809019		0.083	0.834109		0.115	0.881147
	0.966199	1.00477		1.11023	0.845291		0.995918	1.00807		1.03401	1.04531		0.165	0.960389		0.118	0.703137		0.038	0.934786		0.083	0.933608
	0.981182	0.892578		0.969564	1.13685		0.950235	0.818481		0.985407	1.00775		0.034	0.84012		0.073	1.08285		0.05	0.795468		0.123	0.944453
	1.0834	1.21677		1.07495	0.953246		0.970536	1.29104		0.952887	0.963234		0.124	1.0372		0.154	0.818959		0.09	1.22849		0.07	0.933545
	1.02767	1.27862		0.973569	0.991133		1.05731	1.03468		1.03219	1.07339		0.167	1.14903		0.031	0.940178		0.271	0.903749		0.189	0.960378
	1.03893	1.06647		1.05674	1.21665		0.949991	0.88604		0.912644	0.941677		0.136	0.948		0.081	1.06327		0.024	0.861348		0.1	0.952896
	0.972394	0.879734		0.982353	0.857678		1.03448	1.14588		1.02197	1.14829		0.021	0.835514		0.095	0.806309		0.132	1.02296		0.141	1.03767
	1.00779	1.10379		1.04233	0.823757		1.00628	0.950826		1.06587	1.0916		0.092	1.01149		0.038	0.729858		0.093	0.872628		0.214	0.94581
	1.11906	1.52428		1.02938	0.911357		0.953286	0.939887		1.00956	1.05796		0.303	1.25792		0.07	0.817631		0.059	0.910537		0.029	0.967792
	1.15485	1.56689		0.960893	0.870581		1.02798	0.995558		1.00426	1.168		0.217	1.25302		0.066	0.836718		0.309	0.894387		0.1	1.07409
	0.944649	0.935591		1.01977	0.927916		0.953796	0.828553		0.9867	1.05586		0.022	0.914662		0.093	0.840333		0.022	0.80225		0.239	0.988244
	1.02067	1.06961		0.952752	0.854997		0.950344	0.851209		1.0315	0.98167		0.157	0.967801		0.023	0.828762		0.074	0.827181		0.087	0.878908
	0.953228	0.853177		1.04827	1.00375		0.948203	1.02614		0.962861	0.955699		0.03	0.826584		0.079	0.884297		0.083	0.999424		0.057	0.916648
	1.01706	1.10329		1.01007	0.911092		0.956138	0.98516		0.961553	1.05949		0.062	1.00181		0.059	0.833023		0.056	0.951548		0.055	1.01757
	0.956459	0.816256		1.09006	1.02306		0.955182	0.907956		1.04364	1.03419		0.035	0.788143		0.199	0.866751		0.049	0.877856		0.264	0.915155
	1.6846	0.865987		1.02723	1.14469		0.951545	0.864536		0.948184	0.948429		0.601	0.474744		0.105	1.02912		0.033	0.839071		0.16	0.923756
	0.974941	1.07778		1.05204	1.05046		1.0435	0.814455		1.00807	1.04495		0.138	1.02093		0.131	0.922138		0.141	0.72081		0.029	0.957302
	1.05344	0.889386		1.426	0.862069		0.933123	0.837961		1.04588	1.21053		0.143	0.779699		0.37	0.558299		0.039	0.829335		0.19	1.0689
	1.00201	1.12899		1.01296	0.962243		0.953239	0.977059		1.05719	1.0483		0.044	1.04055		0.052	0.877277		0.026	0.946594		0.261	0.915749
	1.00873	1.00491		0.997754	1.11793		0.969344	1.0748		1.00642	1.02738		0.125	0.92002		0.036	1.03476		0.089	1.02399		0.267	0.942753
	0.96939	0.879143		0.993962	0.863899		0.973224	0.906251		0.972292	0.970313		0.034	0.83754		0.138	0.802672		0.177	0.859965		0.092	0.921638
	0.965033	1.10617		1.03905	1.05892		0.958028	0.952042		0.978994	0.97911		0.06	1.05858		0.109	0.941182		0.093	0.917747		0.031	0.923627
	0.927197	0.829683		1.2815	0.858931		1.01289	1.03125		1.09057	1.11655		0.048	0.82639		0.452	0.618991		0.128	0.940259		0.19	0.945517
	1.05255	1.04798		0.977986	0.926496		0.970474	0.831717		0.985638	0.918881		0.156	0.919508		0.022	0.874895		0.084	0.791475		0.125	0.860968
	0.952107	0.871855		0.966351	0.905157		1.00391	1.01533		1.14897	1.17934		0.075	0.845675		0.034	0.865036		0.286	0.934028		0.339	0.947932
	0.966772	1.10806		0.958618	0.937933		0.956091	0.978299		0.955653	1.03161		0.062	1.05848		0.02	0.903589		0.039	0.944969		0.038	0.996915
	0.974843	1.00963		1.02475	0.818548		0.966298	0.866944		1.0558	1.06926		0.094	0.956473		0.059	0.737686		0.064	0.828562		0.334	0.935296
	0.996109	1.66086		1.1141	0.861041		1.06346	0.810001		1.03462	1.0541		0.2	1.53982		0.297	0.713747		0.216	0.703414		0.17	0.940912
	1.14506	1.40919		0.978077	0.861049		0.911939	0.842711		0.999799	1.06016		0.27	1.13654		0.03	0.813018		0.024	0.85341		0.137	0.979269
	0.936033	0.829942		0.954647	0.91092		0.955479	0.905861		1.07835	1.17383		0.035	0.818844		0.034	0.881217		0.042	0.875559		0.191	1.00529
	0.987793	0.917661		0.971485	0.88009		0.95935	0.934639		0.991682	0.967573		0.124	0.857949		0.108	0.836635		0.042	0.899729		0.118	0.901066
	0.945734	0.862888		1.00534	1.23837		0.932438	0.846563		1.00376	0.929458		0.028	0.842618		0.145	1.13758		0.021	0.838463		0.08	0.855152
	0.992959	0.968369		1.09038	0.844921		0.982917	1.13284		0.912038	0.889785		0.069	0.900647		0.269	0.715618		0.086	1.06438		0.025	0.900984
	1.08825	1.20366		0.976422	0.865305		0.974817	0.861051		0.98395	0.937738		0.234	1.02146		0.041	0.818421		0.046	0.815738		0.063	0.880143
	1.0136	0.877067		1.00571	0.910846		0.965101	0.870386		0.972187	1.05131		0.078	0.799121		0.051	0.836405		0.085	0.832883		0.118	0.998679
	0.951175	0.830877		0.948366	0.898494		1.01012	1.02901		1.01839	1.06914		0.06	0.806717		0.03	0.874952		0.174	0.94079		0.254	0.969542
	1.03949	0.852625		1.04675	1.01196		0.990121	0.962396		1.02344	1.08445		0.154	0.7575		0.16	0.892823		0.076	0.897658		0.163	0.978569
	1.00489	0.972551		1.11309	0.846541		0.943811	0.973574		0.990038	0.962418		0.116	0.893797		0.063	0.702363		0.024	0.952639		0.209	0.897752
	1.07223	1.15046		1.01676	1.13436		0.912923	0.810194		0.99386	0.980868		0.176	0.990896		0.15	1.03034		0.036	0.819596		0.097	0.911445
	1.00842	0.895023		1.02722	0.819098		0.974026	1.18226		0.973792	0.981211		0.024	0.819671		0.096	0.736407		0.138	1.12095		0.143	0.930554
	0.92231	1.17305		0.953941	1.0107		1.01472	0.828283		0.957885	0.897286		0.027	1.17459		0.073	0.978463		0.205	0.753836		0.025	0.865093
	0.944375	0.835316		1.14515	0.830893		0.948903	0.944411		0.995261	1.12408		0.028	0.816866		0.055	0.67008		0.068	0.919145		0.19	1.04305
	1.00776	1.13001		0.996541	0.891829		0.943492	0.851536		1.12947	1.22715		0.064	1.03555		0.067	0.826477		0.088	0.833509		0.341	1.00339
	0.998603	1.12559		0.979041	0.937872		1.16657	0.817726		1.0541	1.10209		0.229	1.04096		0.041	0.884683		0.261	0.647357		0.193	0.965558
	1.08239	1.02088		0.963895	0.889994		1.00823	1.0046		1.03967	1.09113		0.23	0.871032		0.041	0.852712		0.128	0.920184		0.173	0.969229
	0.945681	0.860785		0.961136	0.849949		0.973862	0.916255		0.987423	1.03777		0.026	0.840611		0.061	0.816682		0.163	0.868889		0.07	0.970602
	0.95343	0.921145		1.0177	1.33051		0.967439	0.874589		0.994722	1.0129		0.075	0.892246		0.188	1.20738		0.037	0.834883		0.053	0.940395
	0.982536	0.989246		0.973835	1.02081		0.970102	1.00892		0.999537	0.992227		0.045	0.929825		0.04	0.968069		0.11	0.960473		0.2	0.916763
	1.10208	1.30509		1.26434	0.853799		0.945841	0.841239		0.950293	0.957926		0.244	1.09364		0.347	0.623642		0.034	0.821384		0.059	0.930935
	1.06727	1.18835		0.99384	0.988506		0.956769	0.82541		0.94406	0.858428		0.24	1.02829		0.05	0.91856		0.035	0.796723		0.026	0.839748
	1.06568	1.05745		0.983187	0.865532		0.956205	0.853112		1.04111	1.15786		0.181	0.916385		0.034	0.813002		0.1	0.823948		0.184	1.02708
	1.02921	1.05274		0.962983	0.938308		0.92688	0.825316		1.06485	1.06257		0.137	0.944632		0.059	0.899853		0.047	0.822321		0.091	0.921541
	1.07602	1.23787		0.968462	0.996084		1.04326	1.03722		0.985363	0.889729		0.196	1.06243		0.051	0.949858		0.107	0.918172		0.038	0.833886
	1.08817	1.07867		1.06932	0.875578		0.957844	0.952564		1.01222	1.10993		0.144	0.915452		0.383	0.756192		0.081	0.918426		0.057	1.01266
	0.952074	0.864386		0.989383	1.11233		1.03614	1.10742		0.971822	1.07502		0.068	0.838459		0.028	1.03828		0.125	0.987048		0.05	1.02159
	0.96371	0.827921		1.03885	0.890273		0.985893	1.02845		0.947448	0.938068		0.057	0.793392		0.102	0.791435		0.118	0.963378		0.023	0.914374
	0.978058	1.0458		0.964894	0.923299		1.00862	0.967081		0.920264	0.971621		0.037	0.98748		0.024	0.883705		0.08	0.885479		0.041	0.975056
	0.972288	1.26871		1.58282	0.911985		1.01905	0.935409		0.986189	0.919613		0.176	1.20507		0.284	0.532109		0.137	0.847715		0.036	0.861172
	1.01028	1.17987		0.96711	0.991545		0.988799	0.966498		0.972173	0.964632		0.077	1.07855		0.116	0.94685		0.079	0.902689		0.061	0.916353
	0.965142	0.846787		0.934787	0.861228		0.929188	0.842511		1.08422	1.24166		0.035	0.810267		0.027	0.850845		0.032	0.837369		0.126	1.05763
	1.06929	1.07249		1.03316	1.35553		0.974114	0.976809		0.981687	1.03743		0.151	0.926286		0.182	1.21168		0.104	0.926073		0.094	0.975958
	1.15531	0.90383		0.979354	0.929628		0.937404	0.813584		1.02133	1.09067		0.247	0.722493		0.109	0.876626		0.032	0.801532		0.247	0.986212
	1.01786	0.988123		1.06009	1.24456		0.93813	0.843134		0.969415	1.10794		0.122	0.896537		0.211	1.08422		0.044	0.830001		0.152	1.05548
	1.17954	1.51803		0.912885	0.858093		0.979724	0.993669		1.01608	1.04861		0.176	1.18853		0.096	0.868087		0.047	0.936662		0.145	0.953086
	0.976353	1.05373		1.067	1.28013		0.974239	0.861881		0.997205	0.977199		0.15	0.996703		0.221	1.10798		0.107	0.817009		0.049	0.904989
	0.998451	0.931007		0.960952	0.991567		0.993268	0.835821		0.991659	1.04601		0.062	0.861135		0.048	0.952939		0.068	0.777127		0.047	0.974133
	0.971517	1.01718		0.954976	0.872039		1.01763	1.02531		1.03374	0.970011		0.174	0.966921		0.051	0.843312		0.214	0.930485		0.162	0.866586
	1.06744	1.16425		1.07375	1.06483		1.07331	1.05926		1.0155	1.04776		0.09	1.00727		0.208	0.915848		0.248	0.91143		0.093	0.952856
	1.001	0.846245		1.01517	0.946822		0.958671	0.876531		1.01994	1.02814		0.091	0.780741		0.142	0.861336		0.037	0.844389		0.122	0.930948
	0.99109	0.82738		0.991338	0.991782		0.977103	1.01013		1.02048	1.13036		0.049	0.770969		0.083	0.923931		0.066	0.954731		0.108	1.02296
	0.930197	0.820584		0.966687	0.910557		1.05747	1.12279		1.04512	1.12338		0.034	0.814691		0.02	0.869894		0.174	0.980566		0.163	0.99267
	0.92663	1.18131		0.971737	1.08092		0.916776	0.818389		1.04767	1.01737		0.05	1.17734		0.067	1.02728		0.023	0.824407		0.111	0.896808
	1.09783	1.24143		0.962417	1.11627		0.914386	0.893695		1.10324	1.14514		0.262	1.04432		0.034	1.07115		0.06	0.90262		0.225	0.958595
	1.0176	1.10918		0.99661	0.909509		0.970989	0.952304		0.983608	0.990999		0.155	1.00663		0.069	0.842805		0.17	0.905746		0.074	0.930457
	1.08659	1.15698		1.02649	1.11566		0.96147	0.893922		1.11264	0.876607		0.235	0.983346		0.142	1.00375		0.058	0.858636		0.176	0.727606
	0.991332	1.15585		1.09431	0.869927		0.979983	1.03346		1.00624	0.973301		0.129	1.07678		0.252	0.734152		0.034	0.973911		0.066	0.893288
	1.04356	0.856781		0.947693	0.927705		0.948256	0.903007		1.0138	1.03276		0.228	0.758221		0.064	0.904039		0.024	0.879449		0.113	0.940791
	0.995925	1.24439		0.954065	0.821544		0.975897	0.98215		0.995064	1.03818		0.128	1.15392		0.05	0.795239		0.103	0.929434		0.037	0.96353
	1.03077	1.38104		0.91921	0.917734		1.01868	1.03078		0.989901	0.937918		0.204	1.23734		0.054	0.922034		0.197	0.934484		0.094	0.87502
	0.991981	0.839112		0.970478	1.37789		0.949431	0.922103		1.00811	1.04851		0.021	0.781198		0.076	1.31121		0.036	0.896935		0.053	0.960534
	0.948741	0.846926		0.982682	0.859039		0.990516	0.826486		0.996784	1.06311		0.055	0.824409		0.05	0.807319		0.121	0.770582		0.063	0.984971
	0.980787	0.994344		0.971984	0.876239		0.968106	0.861455		1.05221	1.02987		0.074	0.936282		0.03	0.832546		0.027	0.821778		0.134	0.903909
	0.950248	0.880912		1.12196	0.866167		0.970589	0.969455		1.01616	0.96466		0.035	0.856132		0.283	0.712964		0.031	0.922438		0.03	0.876709
	0.994992	0.838048		1.01737	1.09145		0.970931	0.93161		0.994021	1.00661		0.107	0.777846		0.09	0.990763		0.114	0.886116		0.114	0.935213
	1.05411	0.85012		1.01598	0.847533		0.966522	0.929431		0.955092	0.951285		0.193	0.744798		0.067	0.770396		0.049	0.888077		0.084	0.919836
	0.955454	0.82576		0.96742	0.841437		1.33864	0.841452		0.952657	0.927639		0.063	0.798159		0.049	0.803251		0.391	0.580511		0.088	0.899265
	1.05521	1.17679		0.942128	0.866327		0.95622	1.07899		1.08107	1.11069		0.159	1.02992		0.028	0.849214		0.111	1.04209		0.135	0.948818
	0.933041	0.813706		1.01068	1.10733		0.930137	0.825667		0.965794	1.06165		0.032	0.8054		0.12	1.01184		0.068	0.819791		0.108	1.01518
	1.01151	1.00554		1.20971	0.840248		0.933439	0.857535		0.975494	0.830366		0.12	0.918065		0.208	0.641464		0.022	0.84842		0.096	0.786122
	0.982381	0.966605		1.01548	0.938773		0.948837	0.951533		1.07958	1.12525		0.125	0.908686		0.041	0.853753		0.085	0.926142		0.162	0.962582
	0.965242	1.03379		0.955695	0.843881		0.993573	1.0059		0.971936	0.927043		0.062	0.9891		0.02	0.815468		0.167	0.934978		0.051	0.88086
	1.0012	1.15706		1.43319	0.859664		1.16132	0.816415		1.10021	1.02748		0.126	1.06729		0.461	0.55395		0.232	0.64924		0.233	0.86247
	1.14055	1.25984		1.06859	0.95039		0.987763	1.02246		1.02106	1.04075		0.272	1.0201		0.191	0.821366		0.177	0.955961		0.205	0.941323
	0.952893	0.893186		0.960055	0.855492		1.03316	1.20496		0.984729	1.00863		0.119	0.865651		0.085	0.822934		0.119	1.07709		0.089	0.945929
	1.04526	1.08935		0.930791	0.894913		1.00393	0.897283		1.07536	1.08485		0.304	0.962478		0.09	0.88792		0.148	0.82541		0.195	0.931667
	0.951911	0.872663		0.955076	0.940742		0.950676	0.822071		0.940864	1.04147		0.02	0.846633		0.081	0.909656		0.028	0.798586		0.112	1.02226
	1.06771	0.873411		0.96232	0.883256		1.01641	1.15695		0.997007	0.948234		0.036	0.75546		0.078	0.847641		0.187	1.05121		0.135	0.878339
	1.14691	1.19848		0.983663	1.03682		0.928299	0.86306		1.09065	1.21308		0.455	0.965043		0.149	0.97342		0.024	0.858614		0.267	1.02719
	1.00404	1.03703		0.973376	0.888874		0.92251	0.82507		1.08079	1.0717		0.063	0.953861		0.05	0.843344		0.063	0.825971		0.17	0.915753
	1.01797	1.0272		0.980512	0.860686		0.993097	1.04234		1.02928	1.07039		0.161	0.931888		0.039	0.810656		0.097	0.969311		0.149	0.960406
	0.956287	1.26998		0.96611	1.05875		0.939485	0.996107		1.01283	1.04077		0.021	1.22646		0.082	1.01207		0.064	0.979177		0.133	0.948989
	0.91891	0.826871		1.03054	0.948932		1.01365	1.13789		1.004	1.0939		0.036	0.831017		0.149	0.850384		0.147	1.0367		0.241	1.00621
	0.960652	0.840537		1.07254	1.01202		0.936466	0.849243		1.10846	1.19498		0.077	0.808045		0.268	0.871407		0.042	0.8375		0.171	0.995604
	1.00686	1.09343		0.982982	0.951695		0.952514	0.855134		1.07892	1.11077		0.048	1.00292		0.105	0.894122		0.037	0.829101		0.273	0.950783
	1.07309	0.847575		1.00764	1.18367		0.968976	0.840588		0.997363	1.14526		0.115	0.729436		0.071	1.08486		0.028	0.801153		0.029	1.06046
	1.07896	1.24978		1.16484	0.900876		0.958963	0.89759		1.00005	1.04666		0.185	1.06973		0.375	0.714237		0.06	0.864413		0.116	0.966565
	1.12359	1.40808		0.975352	1.02691		0.9276	0.852512		0.965247	0.931691		0.178	1.15735		0.108	0.972339		0.047	0.84876		0.082	0.891411
	0.926254	0.823264		0.991699	0.972812		0.970825	0.985306		1.05694	1.03178		0.022	0.820831		0.144	0.905929		0.142	0.937293		0.194	0.901541
	1.05243	1.42197		1.16436	0.892789		0.965691	0.893429		0.964749	0.919274		0.182	1.2478		0.236	0.708118		0.067	0.854411		0.033	0.879986
	0.942729	0.854054		1.01569	0.959826		0.930872	0.866264		0.950253	0.982703		0.034	0.836649		0.317	0.872722		0.03	0.859419		0.133	0.955054
	0.959348	0.878796		0.94351	0.912612		0.974624	1.11658		0.912402	0.876174		0.032	0.845973		0.043	0.893274		0.1	1.05803		0.039	0.886847
	0.971249	0.87712		0.988757	1.06438		1.00841	1.13125		1.01067	0.991037		0.085	0.834015		0.087	0.994145		0.118	1.03602		0.021	0.905579
	0.960753	0.998896		1.19936	0.879974		0.966446	0.846867		1.05073	1.13594		0.079	0.960181		0.458	0.677588		0.034	0.80925		0.144	0.998411
	1.0379	1.20632		1.02355	1.04165		0.943817	1.10117		0.941532	1.03598		0.148	1.07338		0.088	0.939844		0.043	1.07749		0.073	1.01616
	0.93849	0.909874		0.994864	0.852208		0.940641	0.8347		0.982381	1.09654		0.032	0.895358		0.062	0.791091		0.028	0.819505		0.106	1.03084
	0.936065	1.06553		0.983536	0.931117		1.05484	0.826707		1.02148	1.00392		0.05	1.05124		0.087	0.874296		0.188	0.723785		0.162	0.907646
	1.03533	1.26142		0.940234	0.944851		1.02845	1.02712		0.962604	0.935379		0.079	1.12519		0.043	0.928053		0.14	0.922328		0.081	0.897398
	0.998856	0.963084		0.989671	1.0549		0.923671	0.858308		0.988628	0.969931		0.068	0.890443		0.067	0.984388		0.056	0.858164		0.129	0.906051
	1.04429	1.1229		0.972725	0.92259		0.948974	0.951582		1.03609	1.03839		0.131	0.993035		0.107	0.875918		0.027	0.926055		0.116	0.925567
	0.953483	0.821467		1.15779	0.859023		1.00668	1.13861		0.981525	0.909304		0.05	0.795649		0.166	0.685203		0.101	1.04455		0.021	0.855565
	1.0344	1.08055		1.00561	0.854994		0.969721	1.00679		0.97171	0.973989		0.17	0.964716		0.046	0.785193		0.043	0.958821		0.133	0.925683
	0.964269	0.89201		0.954639	0.884792		1.01687	1.05913		0.930538	0.907687		0.07	0.854313		0.025	0.855947		0.206	0.961899		0.047	0.900838
	0.963329	0.815708		1.09635	0.838965		0.934625	0.885227		1.05099	0.966814		0.05	0.781997		0.208	0.706708		0.023	0.874707		0.141	0.849554
	0.967666	0.871674		1.0617	1.05241		1.01523	1.11578		0.93743	1.0442		0.038	0.831905		0.195	0.915437		0.202	1.01498		0.103	1.02871
	0.933783	0.85871		1.0175	1.15174		0.950963	0.846907		1.07753	1.14284		0.033	0.84927		0.124	1.04536		0.063	0.822464		0.304	0.979491
	0.991101	0.914275		1.17342	0.890212		0.935474	0.863853		0.986157	0.973877		0.17	0.85193		0.267	0.700626		0.047	0.852811		0.101	0.912017
	0.952454	0.855721		1.09829	0.874196		0.970617	1.00318		1.00004	1.00664		0.021	0.829722		0.311	0.735085		0.086	0.954496		0.178	0.92961
	0.977154	0.863713		0.958484	0.985318		1.01153	1.03643		0.995551	1.15889		0.032	0.816303		0.061	0.949372		0.283	0.946256		0.047	1.07503
	0.992373	1.11965		0.951446	0.870756		0.943655	0.945219		1.02636	1.01		0.112	1.04196		0.029	0.845195		0.062	0.925048		0.183	0.908791
	0.957126	0.904768		0.95739	0.988576		0.966808	0.831901		1.02771	0.954949		0.122	0.872998		0.062	0.953599		0.05	0.794651		0.203	0.858136
	0.967184	0.893068		0.963595	1.05055		0.977892	0.95798		1.02821	1.05577		0.089	0.852748		0.07	1.00686		0.103	0.904712		0.193	0.948273
	0.996092	0.862908		0.952122	0.844333		1.33566	0.836425		1.02281	0.994191		0.088	0.800037		0.033	0.818966		0.327	0.578329		0.057	0.897676
	1.24986	1.45682		0.948097	0.990214		0.968992	1.01608		0.963708	0.981845		0.845	1.07644		0.033	0.964543		0.043	0.968398		0.131	0.940898
	0.974391	0.831511		1.00491	1.00842		0.941317	0.825621		1.14494	1.17187		0.055	0.788097		0.151	0.926748		0.033	0.810009		0.472	0.945239
	1.00202	1.00161		0.981922	0.852377		0.949324	0.943201		1.05311	1.01248		0.05	0.923141		0.049	0.801678		0.024	0.917561		0.231	0.887886
	1.03967	0.838077		1.0518	0.881411		1.00046	0.999197		0.9566	0.834055		0.129	0.744445		0.28	0.773912		0.093	0.922355		0.02	0.80521
	0.974238	0.978473		1.00263	0.854521		0.977031	1.05779		1.08978	1.17946		0.094	0.927532		0.062	0.787095		0.074	0.99985		0.228	0.999515
	0.957888	0.825841		1.00396	0.820333		0.96263	1.07717		1.09898	1.26954		0.026	0.796208		0.091	0.754606		0.103	1.0334		0.213	1.06684
	0.991381	1.14461		1.05997	0.873151		0.962936	0.906446		1.0449	1.09517		0.077	1.06626		0.198	0.760747		0.069	0.86934		0.156	0.967949
	1.08252	1.03242		0.958754	0.841836		0.976853	0.910387		0.97274	1.01146		0.254	0.880773		0.026	0.810896		0.081	0.86068		0.1	0.96028
	0.9674	0.871221		0.98658	1.04192		0.963769	0.822179		0.964676	1.07275		0.071	0.831701		0.129	0.975318		0.046	0.787841		0.121	1.02698
	1.03142	1.08776		0.988904	0.831493		0.966141	1.09489		1.01212	0.896988		0.087	0.973964		0.061	0.776514		0.05	1.04658		0.062	0.818464
	1.02842	1.12843		1.00178	0.984601		1.20587	0.821458		1.01707	1.05109		0.138	1.01333		0.079	0.907679		0.081	0.629116		0.144	0.954412
	0.967466	0.900611		0.958594	0.845888		0.984767	1.00959		1.01504	1.07487		0.021	0.859698		0.039	0.814936		0.096	0.9468		0.071	0.977952
	0.984536	1.1008		1.07207	0.838858		0.92334	0.8353		0.983586	0.898225		0.107	1.03258		0.205	0.722622		0.033	0.835461		0.174	0.843369
	0.968798	1.14507		0.971184	1.03187		1.02703	1.08995		0.988441	1.08103		0.043	1.09155		0.108	0.981225		0.317	0.980096		0.122	1.01002
	1.04643	1.16908		1.28993	0.905673		0.972303	0.928588		1.05423	1.11099		0.146	1.03177		0.268	0.648409		0.073	0.881996		0.175	0.973245
	0.972864	0.86848		1.29478	0.85814		0.988016	0.962295		0.967446	0.903		0.13	0.824428		0.459	0.612078		0.06	0.899475		0.2	0.861997
	1.02251	0.855679		0.946364	0.85359		0.956096	0.941683		0.991359	0.980512		0.142	0.772838		0.036	0.832983		0.125	0.909595		0.178	0.913413
	1.01461	1.16627		0.938458	0.966041		1.01279	1.02179		1.01537	1.03575		0.13	1.06156		0.073	0.950661		0.111	0.931726		0.053	0.942052
	1.04509	1.13089		1.36826	0.849068		0.951966	0.831936		0.931997	0.975852		0.175	0.999339		0.57	0.573083		0.021	0.807074		0.059	0.966973
	0.994528	1.14878		1.03099	0.908439		0.941451	0.816839		1.01489	1.02607		0.093	1.06676		0.136	0.81374		0.054	0.801278		0.216	0.933684
	0.985363	1.10674		0.988721	0.907403		0.938939	1.00106		1.05042	1.14704		0.12	1.03727		0.029	0.847562		0.103	0.984621		0.148	1.00846
	1.00649	1.09134		1.20141	1.27082		0.968743	0.883087		0.975443	0.946904		0.173	1.00138		0.362	0.976873		0.052	0.84186		0.061	0.896497
	1.01004	1.13704		0.990548	0.949571		0.966198	0.98652		1.02919	1.05569		0.106	1.03964		0.038	0.885313		0.046	0.942942		0.148	0.947293
	1.03313	1.11138		1.0457	1.05932		0.968653	0.819609		0.973724	0.953826		0.145	0.993463		0.035	0.935546		0.074	0.781418		0.125	0.904645
	0.929211	0.857907		1.16928	0.907928		0.992474	1.00688		0.995538	0.869498		0.026	0.85265		0.396	0.717094		0.082	0.936919		0.039	0.806596
	0.983695	0.828283		0.952147	0.940515		0.986428	0.954521		0.935433	0.874562		0.035	0.777612		0.047	0.912235		0.11	0.893645		0.025	0.863421
	0.951628	0.835279		0.936558	0.887402		0.965889	0.920693		0.957788	0.915286		0.045	0.810605		0.057	0.875045		0.077	0.880304		0.071	0.882536
	0.949858	1.20335		0.987518	0.978247		0.963411	0.948208		2.06407	1.11033		0.055	1.16997		0.028	0.914847		0.025	0.908944		0.865	0.496789
	1.00706	0.996536		0.996354	1.0023		0.954219	0.898457		1.05716	1.19887		0.113	0.913869		0.08	0.929025		0.027	0.869549		0.086	1.04731
	0.970615	1.20124		1.03527	1.06465		1.03148	1.08674		1.14241	1.24304		0.048	1.14295		0.057	0.949721		0.211	0.972991		0.248	1.00487
	0.962658	0.824451		1.04312	0.873494		0.938783	0.854831		1.00131	1.01853		0.039	0.790931		0.101	0.773343		0.125	0.840931		0.126	0.939398
	1.00511	1.01921		1.03112	0.867127		0.950615	1.11576		1.01488	1.07285		0.07	0.936473		0.054	0.776636		0.067	1.08396		0.147	0.976266
	1.04035	1.64587		1.0137	1.09365		0.956303	0.853128		0.976302	1.06023		0.191	1.46104		0.078	0.996354		0.044	0.823879		0.123	1.00291
	0.959414	0.866694		1.11576	0.839649		0.963877	1.12607		1.00881	1.03999		0.111	0.834266		0.2	0.694982		0.084	1.07892		0.151	0.952062
	0.927879	1.0001		1.05928	0.848768		1.08529	1.21976		1.04571	1.07405		0.034	0.995397		0.275	0.739985		0.261	1.03794		0.258	0.94854
	1.01327	1.13434		1.00504	0.846193		0.938632	0.955366		0.965613	0.927293		0.126	1.03387		0.033	0.777557		0.041	0.939981		0.095	0.886867
	1.11153	0.884948		1.10303	0.902295		1.03696	0.924101		1.11529	1.17547		0.172	0.735262		0.133	0.75545		0.273	0.823008		0.228	0.973347
	0.958872	0.854928		1.03552	0.848469		0.926199	0.811641		0.921178	0.855049		0.022	0.823405		0.026	0.756699		0.054	0.809291		0.028	0.857221
	0.977114	1.05558		0.966253	1.04135		0.961853	0.898812		1.01151	1.1568		0.047	0.997683		0.099	0.995296		0.077	0.862988		0.103	1.05617
	0.974374	0.872957		1.13101	0.881291		1.03877	0.818665		1.00596	1.01577		0.053	0.827394		0.135	0.719608		0.069	0.727833		0.098	0.932527
	1.02245	1.07375		0.969154	0.862292		0.966407	1.04828		1.02221	1.04904		0.172	0.969849		0.03	0.821687		0.128	1.00176		0.123	0.947751
	0.97148	0.846211		1.2227	0.858778		0.991869	0.923945		1.04029	1.25472		0.026	0.804432		0.178	0.648645		0.189	0.860274		0.094	1.11387
	0.960539	0.859798		1.03461	1.08046		0.984179	0.986657		0.980668	1.108		0.031	0.826659		0.118	0.96444		0.108	0.925842		0.101	1.04342
	1.00439	0.842094		1.08768	1.05472		0.983462	1.00866		1.06435	1.10765		0.037	0.774292		0.112	0.895535		0.154	0.947178		0.148	0.961091
	0.937618	0.829832		0.950119	0.857007		0.928145	0.809395		0.974866	1.01745		0.031	0.817352		0.051	0.833011		0.023	0.80536		0.112	0.963858
	1.04323	1.12768		0.962171	0.865053		0.959209	0.817642		0.951732	1.01611		0.225	0.998275		0.041	0.8303		0.065	0.787218		0.08	0.985982
	0.990963	1.01615		1.14419	0.89469		0.999584	1.02182		1.01729	1.01659		0.122	0.946993		0.165	0.722136		0.162	0.944063		0.11	0.922877
	0.958449	1.22465		0.954869	0.849001		0.953096	0.813714		0.922007	0.994767		0.023	1.18001		0.043	0.821126		0.048	0.788461		0.031	0.996397
	0.948183	0.966821		1.14076	0.887732		0.937794	0.994304		0.950971	1.00347		0.145	0.941671		0.318	0.718677		0.043	0.979167		0.037	0.974495
	0.986853	0.820344		1.56616	0.923895		0.962906	0.944541		1.00842	1.10579		0.126	0.767695		0.523	0.544794		0.084	0.905904		0.18	1.01269
	0.948175	0.888447		1.02362	0.937643		0.982299	0.829264		1.00938	1.14483		0.033	0.865343		0.132	0.84595		0.036	0.77964		0.049	1.04744
	1.05152	1.04864		0.938269	0.895301		0.948199	0.924352		0.947091	0.94086		0.148	0.920985		0.028	0.881224		0.104	0.90029		0.047	0.917441
	0.996923	1.00312		0.981946	0.847389		0.970519	1.03125		0.994889	0.926453		0.07	0.929258		0.082	0.796967		0.131	0.981304		0.059	0.859991
	0.950449	0.830347		0.979719	0.963128		0.924879	0.819709		0.964401	1.01171		0.021	0.806818		0.046	0.907879		0.04	0.818502		0.036	0.96882
	0.99565	1.16222		0.970454	0.977107		0.958087	0.855407		1.02501	1.0598		0.11	1.07802		0.07	0.929849		0.055	0.824542		0.16	0.954867
	1.12746	0.83218		1.32319	1.57242		0.968856	0.857588		1.04368	1.12221		0.216	0.68165		0.337	1.09747		0.067	0.817456		0.132	0.993
	0.967887	0.860098		1.01885	0.990724		0.930937	0.841922		1.07442	1.06045		0.048	0.820669		0.05	0.898027		0.022	0.835212		0.195	0.911507
	0.981872	0.846996		1.11816	0.83375		0.995885	0.937872		0.957549	0.967637		0.026	0.796658		0.261	0.688612		0.113	0.86972		0.071	0.933247
	0.960108	0.834171		0.988256	0.85679		0.964848	1.08021		1.03053	1.06423		0.056	0.802379		0.068	0.800664		0.062	1.03394		0.177	0.953712
	0.994911	1.02952		0.965547	0.874772		0.943777	0.869793		1.04791	1.13446		0.109	0.955641		0.034	0.836694		0.023	0.851121		0.119	0.999792
	1.00211	0.948043		0.95985	0.949262		0.972809	0.956545		0.998656	1.06146		0.12	0.873694		0.107	0.91333		0.098	0.908078		0.06	0.981592
	0.969335	0.862632		0.969261	0.840224		1.00539	0.993934		1.0337	1.03902		0.02	0.821858		0.023	0.80057		0.133	0.912993		0.2	0.928271
	1.00178	1.00321		0.990265	1.09057		0.93712	0.906365		0.998601	1.01359		0.068	0.924838		0.091	1.01706		0.078	0.893209		0.087	0.93738
	0.959786	0.836569		1.07206	0.923722		0.910484	0.829056		0.992772	1.0335		0.025	0.804957		0.111	0.795731		0.037	0.840924		0.065	0.961403
	1.02872	0.972577		1.06126	1.20039		0.965684	0.909574		1.01242	0.944308		0.108	0.873116		0.213	1.0446		0.023	0.869857		0.073	0.861389
	1.02677	1.20173		1.09053	0.856466		0.986493	1.10172		1.04888	1.03264		0.212	1.08089		0.08	0.725302		0.118	1.03139		0.213	0.909216
	0.974647	0.8463		0.996248	1.01084		0.944421	0.845729		0.986453	1.04563		0.044	0.801903		0.126	0.937047		0.048	0.827009		0.083	0.978915
	0.965341	0.869217		0.967022	0.952725		0.953637	0.980159		1.12336	1.18024		0.034	0.831558		0.157	0.909864		0.067	0.949202		0.503	0.970283
	0.969105	0.848272		1.98394	1.11735		0.951464	0.822989		1.05622	1.01872		0.034	0.808369		1.033	0.520124		0.046	0.798817		0.169	0.890732
	1.01082	1.06193		1.11204	0.893252		0.961136	0.972217		0.961734	0.932707		0.134	0.970215		0.148	0.741817		0.077	0.934165		0.031	0.895644
	1.01941	1.27614		0.986798	0.841718		0.969468	0.970075		1.01215	0.986025		0.12	1.15609		0.04	0.787741		0.035	0.924096		0.17	0.899678
	0.996705	0.972721		0.991352	0.914894		0.945103	0.833291		1.01158	1.13964		0.097	0.901294		0.061	0.852291		0.037	0.814259		0.102	1.04043
	0.982425	0.902567		1.00721	0.838058		0.93623	0.907229		1.00662	0.940314		0.071	0.848448		0.112	0.768422		0.085	0.89491		0.06	0.862689
	0.941294	1.11486		1.00525	0.860342		0.953888	0.884365		0.986628	0.922731		0.1	1.09381		0.057	0.790392		0.054	0.856208		0.066	0.863707
	0.989652	0.942551		1.00063	0.944531		0.963707	0.8364		0.973294	1.07959		0.021	0.879563		0.047	0.871739		0.025	0.801519		0.058	1.02438
	0.966744	0.840983		0.968544	0.844706		0.954245	0.876159		1.06698	1.07408		0.021	0.80338		0.057	0.805436		0.034	0.847945		0.075	0.929668
	0.955508	0.856272		1.00161	0.926591		0.954329	0.875115		1.06508	1.15881		0.029	0.827603		0.048	0.854346		0.088	0.846861		0.292	1.00479
	1.03426	1.28062		1.00968	0.975465		0.939756	1.07827		0.953301	0.843997		0.038	1.14349		0.067	0.892223		0.048	1.05963		0.024	0.817628
	0.954444	1.17421		0.966543	0.91983		0.992087	1.04655		0.995087	0.962759		0.115	1.13617		0.08	0.878883		0.238	0.974219		0.045	0.893514
	1.05198	1.14458		1.30017	0.876406		0.979841	0.98931		0.983672	0.97645		0.092	1.0048		0.223	0.622517		0.109	0.932442		0.102	0.916737
	0.965255	0.94792		1.08564	1.13754		0.997662	0.822077		1.11133	1.19949		0.033	0.906932		0.063	0.967663		0.099	0.760981		0.182	0.996779
	0.909275	0.940511		1.51666	0.920881		0.964604	0.874912		0.981569	1.07553		0.02	0.955242		0.353	0.560736		0.118	0.837646		0.129	1.01193
	1.00021	0.977069		1.00395	0.899964		1.03919	1.11263		0.992647	0.953496		0.118	0.902153		0.047	0.827866		0.222	0.988784		0.027	0.887092
	0.979014	1.02658		0.963072	0.937072		0.978005	1.04856		1.0274	1.08158		0.075	0.968391		0.044	0.898585		0.208	0.990142		0.104	0.972221
	0.936803	0.943307		1.05682	0.889372		0.981118	0.93366		1.03426	1.02424		0.17	0.929927		0.057	0.777189		0.134	0.878845		0.158	0.914573
	0.96376	0.868614		0.957918	0.870568		0.94383	0.905051		0.990141	0.980901		0.022	0.832345		0.043	0.839304		0.048	0.885573		0.071	0.9149
	0.967391	0.824625		1.66827	0.892045		0.950893	0.920736		1.02935	1.10814		0.077	0.787226		0.931	0.493815		0.025	0.894228		0.175	0.994206
	0.967316	0.852372		1.4104	0.909506		0.96068	1.0108		1.00566	1.00969		0.045	0.813777		0.352	0.595538		0.061	0.971699		0.125	0.927214
	0.938838	0.87037		0.958397	0.984887		0.944575	0.931547		1.04653	1.00225		0.02	0.856166		0.079	0.949044		0.039	0.910779		0.174	0.884439
	0.956203	0.89734		1.06706	1.15586		0.929151	0.82284		1.02323	1.03077		0.036	0.866666		0.068	1.00037		0.067	0.817851		0.201	0.930321
	0.99309	1.39797		1.14572	0.880774		0.94596	0.888904		1.03385	1.07561		0.21	1.30003		0.422	0.709957		0.046	0.867814		0.155	0.960822
	1.00303	0.838		1.04553	1.34983		0.981497	0.935058		1.00506	1.03761		0.059	0.771572		0.129	1.19231		0.098	0.879821		0.161	0.953426
	0.982775	0.872144		1.25289	0.857801		0.978381	0.958296		0.988997	1.05068		0.021	0.819556		0.295	0.632292		0.261	0.904558		0.095	0.981118
	0.993455	0.855886		0.914961	0.859712		0.942875	0.843191		0.956483	0.932402		0.07	0.795632		0.031	0.867752		0.027	0.825879		0.098	0.900267
	0.959678	0.998825		1.03342	1.09865		0.999166	1.06242		1.00299	0.960722		0.045	0.961189		0.116	0.981813		0.155	0.981982		0.172	0.884596
	0.946303	1.19907		0.966411	0.951184		0.937101	0.808992		1.07307	1.19454		0.111	1.1702		0.098	0.908967		0.034	0.797265		0.13	1.02806
	0.948379	0.82308		0.957371	1.03993		0.988788	1.31646		0.949912	0.994335		0.119	0.801503		0.022	1.00316		0.125	1.22955		0.057	0.966706
	0.983698	0.920043		0.964098	0.996284		0.970084	1.0415		1.06491	1.06088		0.061	0.863757		0.035	0.954349		0.095	0.991502		0.127	0.920022
	0.987105	1.08318		1.07902	0.853331		0.943894	1.00314		1.02512	1.05656		0.064	1.01341		0.068	0.730351		0.028	0.981482		0.253	0.951835
	1.00647	1.12483		1.02678	1.07794		0.9543	0.908709		0.990533	1.0374		0.141	1.03212		0.059	0.969536		0.118	0.879396		0.068	0.967208
	1.15206	1.13721		0.982114	1.08977		0.938898	0.882133		1.02505	1.00601		0.401	0.911608		0.053	1.02475		0.076	0.867682		0.093	0.906361
	1.08881	1.21575		0.993385	1.19546		0.971165	1.04032		1.08281	1.10325		0.22	1.03118		0.044	1.11138		0.05	0.989274		0.111	0.940955
	1.01982	1.12378		0.973401	0.856206		1.0075	1.08375		0.978833	0.993033		0.166	1.01766		0.036	0.812327		0.153	0.993412		0.111	0.936914
	0.943479	0.956326		1.0556	1.14157		0.975378	1.07737		0.960639	0.969459		0.077	0.936092		0.165	0.998728		0.03	1.02009		0.024	0.931997
	1.28843	1.57246		1.19803	0.888587		0.971817	1.04961		1.08326	1.1832		0.47	1.12711		0.259	0.684981		0.102	0.997448		0.272	1.00872
	0.975932	0.962111		1.02217	0.850277		0.962426	0.916141		1.10049	1.15795		0.042	0.910438		0.021	0.768217		0.122	0.879103		0.172	0.971743
	1.00394	1.17156		1.01271	1.16491		0.969761	0.833572		0.978013	0.915414		0.161	1.07771		0.082	1.06231		0.134	0.793822		0.093	0.864406
	0.95833	0.819773		1.13161	0.898171		0.925063	0.942224		0.973193	0.907495		0.032	0.789993		0.136	0.733007		0.079	0.940649		0.035	0.861173
	1.02742	1.07634		0.968793	0.904991		0.977367	0.884372		1.02379	1.1149		0.16	0.967486		0.051	0.862698		0.025	0.835646		0.154	1.0057
	0.98449	0.854082		0.974784	1.02951		0.948634	1.00001		0.949131	0.827137		0.057	0.801186		0.132	0.975364		0.028	0.973534		0.055	0.804815
	1.05717	1.23897		1.02438	0.867747		0.950616	0.823577		1.01664	1.1005		0.179	1.08233		0.114	0.782309		0.028	0.8001		0.125	0.999694
	1.00232	1.01794		1.00265	1.10374		0.942564	0.934365		1.26974	0.904708		0.034	0.937912		0.125	1.01663		0.036	0.915484		0.303	0.658019
	0.987129	0.950085		0.992519	1.09221		0.970708	1.00363		0.98657	0.98123		0.12	0.88886		0.067	1.01628		0.027	0.954835		0.08	0.918519
	0.945212	0.848214		1.03824	0.928755		0.927976	1.00568		0.995831	1.05093		0.079	0.828745		0.027	0.826127		0.034	1.00085		0.122	0.974618
	0.997341	1.07286		0.978208	0.895944		0.944478	0.981877		1.0011	1.06114		0.1	0.993449		0.047	0.845852		0.053	0.960086		0.089	0.978905
	0.930824	1.30939		1.00748	1.16251		0.950158	0.849668		0.947622	1.01301		0.061	1.29911		0.124	1.06563		0.043	0.825845		0.059	0.987242
	0.953551	0.837341		1.00507	1.00179		1.00404	1.01717		0.965145	0.941249		0.04	0.810967		0.135	0.920497		0.146	0.935591		0.103	0.900652
	1.0044	1.02236		1.04792	0.821127		0.972075	0.951902		0.987753	1.10827		0.142	0.940031		0.104	0.723645		0.138	0.904352		0.155	1.0362
	0.882943	0.842259		0.893154	0.850237		0.955038	0.904957		1.07368	1.12593		0.021	0.880963		0.086	0.879141		0.076	0.87509		0.154	0.968457
	0.95951	0.847684		0.982325	1.09184		0.97978	0.827503		0.98342	1.03878		0.021	0.815886		0.096	1.02648		0.085	0.779984		0.071	0.975504
	1.09548	1.00241		1.01527	0.995452		0.985492	0.941504		0.994378	1.11587		0.131	0.845055		0.125	0.905485		0.155	0.882295		0.111	1.03635
	0.986033	0.870476		0.988363	1.05303		0.98793	1.08129		0.959355	0.888703		0.034	0.815287		0.119	0.983944		0.122	1.01079		0.092	0.855504
	0.960486	0.873239		0.951092	0.996351		0.980711	1.15233		1.01802	1.07229		0.052	0.839627		0.039	0.967464		0.11	1.08513		0.147	0.97275
	1.1007	1.15105		1.02486	0.884222		1.01781	1.05314		0.999626	1.07925		0.183	0.96576		0.05	0.796785		0.216	0.955577		0.12	0.997076
	1.03026	0.988129		0.961154	0.986849		0.971823	0.923402		1.00347	1.10057		0.274	0.885753		0.066	0.948207		0.103	0.877503		0.148	1.01288
	1.03705	0.97456		1.14386	0.894534		0.974254	0.991626		1.05337	1.06699		0.191	0.867867		0.249	0.722221		0.101	0.939984		0.111	0.935457
	0.914836	1.07211		1.10316	0.865521		0.972485	1.02676		1.0308	1.16338		0.08	1.08228		0.109	0.724573		0.098	0.975054		0.179	1.0423
	1.10733	1.41874		0.970359	0.918888		0.94158	0.849245		1.00053	1.00365		0.216	1.18324		0.023	0.874531		0.032	0.832953		0.183	0.926401
	0.984069	0.9046		1.11559	0.884789		0.924472	0.817006		1.01964	0.980299		0.031	0.848938		0.216	0.732456		0.021	0.816162		0.094	0.887883
	1.01993	1.03992		0.978114	1.01888		1.00138	1.02995		1.03468	1.16285		0.284	0.941618		0.021	0.962007		0.149	0.949872		0.161	1.03791
	0.993296	1.16143		1.00194	1.13204		0.924099	0.81016		0.968784	0.937143		0.05	1.07984		0.136	1.04344		0.025	0.809651		0.097	0.893354
	0.999536	1.09434		1.27412	0.942325		0.991343	1.1773		0.986614	1.01219		0.166	1.01111		0.28	0.683021		0.089	1.09675		0.113	0.947461
	0.988985	0.906003		1.11954	0.844892		0.94867	0.900401		1.03632	1.28824		0.144	0.846029		0.392	0.696957		0.037	0.876528		0.246	1.14802
	0.953383	0.886613		0.957182	0.881295		0.966671	0.837431		1.05829	1.1497		0.022	0.858839		0.043	0.8503		0.028	0.800047		0.177	1.00329
	0.964549	1.08		0.923441	0.842818		0.956746	0.866767		1.10327	1.17122		0.022	1.03405		0.047	0.842887		0.079	0.836663		0.307	0.980399
	0.994306	0.840165		1.05348	0.897242		0.948439	0.821827		1.02824	0.954135		0.094	0.78035		0.021	0.786554		0.034	0.800233		0.148	0.856961
	1.02732	1.10536		1.13221	0.874824		0.93861	0.815351		0.994016	1.09797		0.11	0.99367		0.102	0.713572		0.023	0.80224		0.042	1.0201
	0.997179	0.923872		0.985268	1.08448		0.94457	1.16903		1.05242	1.13662		0.064	0.855625		0.079	1.01651		0.043	1.14298		0.16	0.997405
	1.015	1.12114		1.00748	0.995011		0.937378	0.901753		1.12485	1.21991		0.112	1.02009		0.043	0.912085		0.053	0.888418		0.197	1.00157
	0.953195	0.840557		1.16248	0.887378		0.968792	0.935477		0.950836	0.938438		0.046	0.814386		0.1	0.704963		0.105	0.891759		0.061	0.911476
	0.971689	0.994385		1.11965	0.852777		0.96656	1.07838		1.03265	1.12759		0.039	0.945088		0.308	0.703391		0.127	1.03035		0.206	1.00843
	1.04398	1.19146		1.01862	0.975555		0.942884	0.847254		1.01835	1.02769		0.183	1.05399		0.103	0.884475		0.052	0.829851		0.084	0.931989
	0.995823	1.04062		0.970944	0.987624		0.951102	0.907523		1.06035	1.12495		0.043	0.96506		0.027	0.939383		0.02	0.881201		0.241	0.979786
	1.13615	1.37915		1.00347	1.0681		0.928435	0.821927		0.985805	1.02629		0.324	1.12104		0.081	0.982998		0.047	0.817573		0.094	0.961441
	0.963177	1.10461		0.976153	1.04278		0.965573	0.944617		1.02435	1.00828		0.127	1.05913		0.104	0.986548		0.11	0.903474		0.2	0.909027
	0.971077	0.87159		1.14107	0.891846		0.929003	0.825086		1.01394	1.05045		0.022	0.828903		0.143	0.721809		0.031	0.820214		0.099	0.956772
	0.940322	0.87235		1.03371	0.86186		0.936848	0.921025		1.05109	1.06322		0.104	0.85676		0.171	0.769986		0.041	0.907919		0.203	0.934174
	0.928148	0.907549		0.952025	0.93081		0.916553	0.842428		0.978935	0.987924		0.038	0.903021		0.053	0.902937		0.041	0.848829		0.113	0.931998
	0.952024	0.858236		0.988679	0.971928		0.959852	0.832444		0.999996	1.0152		0.034	0.832538		0.032	0.90787		0.04	0.800932		0.206	0.93756
	0.959214	0.867113		0.985428	1.07723		0.957852	1.07702		1.04737	1.02399		0.028	0.834843		0.04	1.00955		0.114	1.03842		0.156	0.902902
	1.02682	1.08071		1.0756	0.870408		0.945452	0.834976		1.02646	1.01861		0.149	0.971992		0.108	0.747336		0.026	0.815604		0.055	0.916453
	1.06534	1.19556		0.967277	0.949857		0.961015	0.941503		1.02181	1.00632		0.152	1.0364		0.034	0.906885		0.057	0.904767		0.031	0.909524
	0.986924	1.14085		0.993142	0.964485		1.04545	1.12409		0.982755	0.995379		0.121	1.06756		0.039	0.89687		0.243	0.99298		0.118	0.93538
	1.02227	1.02255		1.1053	0.857755		0.984818	1.11287		0.962056	0.995354		0.081	0.923769		0.039	0.716684		0.118	1.0436		0.05	0.955481
	0.988047	0.895706		0.949539	1.03523		0.957922	0.995931		1.0407	1.10546		0.09	0.837207		0.055	1.00686		0.069	0.96016		0.336	0.980982
	1.02351	1.04868		1.40745	0.888409		0.964238	0.824801		0.972809	1.04761		0.197	0.946232		0.271	0.582941		0.082	0.789968		0.047	0.994527
	0.996801	1.00563		0.993581	0.903499		0.955732	0.851205		0.998572	0.988528		0.064	0.931695		0.067	0.839787		0.062	0.822514		0.081	0.914228
	0.945048	0.874637		1.20563	0.911978		0.957348	0.957386		1.02942	1.06025		0.047	0.854711		0.142	0.698576		0.065	0.923554		0.159	0.95118
	1.03481	1.1302		1.13697	0.862802		0.959164	0.835536		1.01415	1.11914		0.23	1.00865		0.169	0.70082		0.032	0.804484		0.152	1.01912
	0.930139	0.869683		1.0166	1.08239		1.00425	1.18649		1.01577	1.06753		0.027	0.863491		0.144	0.98329		0.103	1.0911		0.081	0.970576
	0.982832	1.03509		1.20169	0.970207		0.958138	0.975018		1.03211	1.06102		0.12	0.972621		0.27	0.745622		0.027	0.939787		0.161	0.949383
	0.953505	0.853492		1.26476	0.891709		0.971584	1.0052		0.976346	1.01535		0.098	0.826649		0.132	0.65112		0.078	0.955465		0.109	0.960408
	1.0462	1.10657		1.92561	0.970342		0.921738	0.844798		1.03835	1.20443		0.231	0.976807		0.551	0.465373		0.021	0.846429		0.087	1.07123
	0.956641	0.907449		0.965224	0.901368		1.03732	1.27581		1.0167	1.02954		0.08	0.876028		0.066	0.862421		0.19	1.13584		0.125	0.935181
	1.25484	0.86769		1.01967	0.845425		0.950574	0.831748		1.01392	1.07412		0.282	0.638587		0.352	0.765704		0.031	0.808073		0.136	0.978348
	0.950388	0.852091		1.02918	1.14725		0.969425	0.93283		1.13911	1.17773		0.062	0.827999		0.159	1.02946		0.096	0.888654		0.236	0.954829
	1.19535	0.865293		0.985051	1.00893		0.959769	1.02358		0.940566	0.875902		0.034	0.668517		0.068	0.945908		0.086	0.984919		0.022	0.860025
	1.01701	1.00197		0.946348	0.865348		0.955216	0.829639		0.973014	0.936251		0.138	0.909854		0.041	0.844471		0.023	0.802108		0.133	0.888624
	0.943299	0.85668		0.877951	0.914419		0.952646	1.0612		1.05017	1.12535		0.048	0.838714		0.058	0.961877		0.037	1.02875		0.236	0.989632
	0.98015	1.01094		1.01516	1.07909		0.968284	0.871092		0.986363	0.998057		0.134	0.952531		0.12	0.981679		0.047	0.830818		0.045	0.934466
	0.976189	0.886072		1.03049	0.934913		0.96582	1.03449		1.00995	1.02579		0.05	0.838263		0.051	0.83786		0.035	0.989182		0.167	0.938007
	0.967417	0.863477		1.10276	1.18542		0.975437	1.00652		0.998288	0.99342		0.042	0.824294		0.208	0.992742		0.04	0.952944		0.075	0.919014
	1.14049	0.858398		0.95953	0.942507		0.943163	0.876601		0.99601	1.0476		0.172	0.695094		0.042	0.907134		0.036	0.858342		0.154	0.97135
	1.026	1.04375		1.01224	0.894007		0.947842	0.967796		1.07955	1.1476		0.201	0.939495		0.035	0.815648		0.041	0.942959		0.237	0.981731
	0.946586	0.845782		1.02828	0.83686		0.949472	0.897711		0.969401	0.938691		0.02	0.82517		0.121	0.7516		0.041	0.873171		0.025	0.894261
	1.02975	1.10993		0.957902	1.01242		0.958318	1.14403		1.06346	1.11905		0.122	0.995421		0.044	0.976077		0.023	1.10248		0.262	0.971787
	0.94746	0.832018		1.10884	0.915384		0.956596	0.894112		1.0193	0.952173		0.033	0.810993		0.116	0.762392		0.042	0.863194		0.084	0.862696
	0.971811	0.881901		0.945833	0.93088		1.12381	1.5308		1.01259	0.95895		0.03	0.838076		0.046	0.908916		0.299	1.25797		0.166	0.874597
	1.02703	1.11788		0.963114	0.853349		0.957557	0.924949		0.995786	0.9642		0.193	1.00521		0.03	0.818265		0.022	0.892068		0.145	0.894224
	1.01583	1.0216		1.00254	0.860364		0.961678	0.913967		0.964054	0.958266		0.127	0.928757		0.054	0.792548		0.051	0.8777		0.144	0.917973
	1.00289	0.939504		1.22074	0.891003		0.949544	0.810911		0.998831	0.939752		0.03	0.865151		0.396	0.674065		0.068	0.788684		0.132	0.868893
	1.07362	1.08338		1.07751	1.08968		0.948022	0.841237		0.990218	1.00256		0.386	0.931909		0.212	0.933946		0.036	0.819492		0.068	0.935027
	1.00186	1.02465		0.996711	0.984173		0.971972	0.932693		1.03075	1.11671		0.14	0.94452		0.138	0.9119		0.091	0.886196		0.125	1.00054
	1.10713	1.15876		1.05268	0.881356		0.915365	0.850376		0.993537	1.00113		0.218	0.966588		0.02	0.773218		0.046	0.857949		0.099	0.930578
	1.24501	0.851893		1.00654	0.891341		0.94916	0.868039		1.00619	1.00738		0.069	0.631911		0.105	0.817824		0.047	0.844587		0.057	0.924613
	0.965262	0.876161		0.98229	0.85394		0.946069	0.952151		1.03778	0.978378		0.025	0.838269		0.055	0.802847		0.022	0.929454		0.172	0.870658
	0.982221	0.931073		1.00389	0.852533		0.944745	0.891843		0.993305	1.00334		0.071	0.875426		0.059	0.784276		0.046	0.871803		0.132	0.932851
	0.996016	0.922882		1.33377	0.902813		0.958325	0.987655		0.963145	0.992218		0.085	0.855707		0.291	0.625119		0.045	0.951781		0.027	0.951394
	1.01746	1.10297		1.23571	0.931704		1.02218	1.15184		0.983465	0.935954		0.112	1.00113		0.126	0.696318		0.161	1.04066		0.073	0.878902
	0.976285	0.939247		1.01688	0.897275		0.947766	0.826859		1.03564	1.06031		0.05	0.888481		0.039	0.814895		0.039	0.805703		0.12	0.94552
	1.10801	1.21151		0.947536	0.853169		0.964368	1.11467		0.969162	0.987779		0.212	1.00978		0.022	0.831542		0.141	1.06745		0.05	0.941257
	1.0129	1.06172		0.971126	0.946897		0.956362	0.841142		1.04672	0.979552		0.125	0.968027		0.043	0.900476		0.02	0.812254		0.071	0.864255
	0.983944	1.07086		0.997402	1.16011		0.959824	0.841335		0.947699	0.927631		0.09	1.0051		0.086	1.07417		0.119	0.80951		0.034	0.903961
	0.958126	0.888514		1.60888	0.967339		1.16654	1.5253		1.01714	0.95344		0.036	0.85642		0.598	0.555264		0.717	1.20755		0.136	0.865678
	0.992814	0.94583		1.09221	0.860442		1.01239	1.07615		0.972722	0.935694		0.028	0.879813		0.209	0.727548		0.169	0.981682		0.045	0.888362
	0.955896	0.850813		1.03208	1.04378		0.983901	0.834648		1.034	1.05714		0.036	0.821994		0.085	0.933983		0.032	0.783424		0.17	0.944185
	0.977164	0.985579		0.965846	0.882277		0.99482	1.05893		1.06863	1.12557		0.066	0.93147		0.021	0.84361		0.255	0.983035		0.331	0.972731
	0.977857	1.05916		0.932446	0.875566		0.941113	0.93824		1.06238	1.22862		0.067	1.0003		0.049	0.867182		0.054	0.920698		0.132	1.06803
	1.05201	1.20553		1.01774	1.07451		0.934188	0.835131		1.09875	1.09033		0.248	1.05829		0.099	0.975028		0.053	0.825591		0.216	0.916436
	0.974832	0.869963		1.00418	0.98487		0.949352	0.858124		1.02212	0.960604		0.081	0.824168		0.048	0.905761		0.06	0.834772		0.063	0.867937
	0.971759	0.85098		1.02902	1.04788		0.959997	0.823757		0.948144	0.947008		0.041	0.808734		0.078	0.940449		0.076	0.792455		0.027	0.92241
	1.04648	1.04524		0.947488	0.936		0.978579	1.02709		1.10417	1.14685		0.261	0.922417		0.067	0.91232		0.102	0.969294		0.313	0.959214
	0.938973	0.943044		1.03953	0.88756		0.947593	0.905212		0.928787	0.898337		0.02	0.927521		0.138	0.78851		0.022	0.882213		0.03	0.89324
	0.955886	0.852447		1.34257	0.904214		0.981311	0.931249		1.00296	1.02678		0.044	0.823581		0.229	0.621987		0.134	0.876403		0.083	0.945453
	1.04013	1.1224		1.04896	0.988669		0.979974	0.980766		1.03687	1.06555		0.096	0.996556		0.105	0.870434		0.194	0.924264		0.159	0.949055
	0.949846	0.830287		1.08586	0.849461		0.963547	0.991724		0.966991	0.866122		0.055	0.807272		0.079	0.722461		0.096	0.950524		0.045	0.827183
	0.971878	0.948935		0.989121	0.896896		1.36751	0.840722		0.947499	0.912376		0.079	0.901716		0.119	0.83741		0.376	0.567764		0.067	0.889284
	0.998105	1.02134		0.98903	1.05174		0.972691	1.00704		0.984074	0.994196		0.065	0.945012		0.057	0.982073		0.062	0.956135		0.117	0.933017
	1.02894	1.13925		1.13983	0.869035		0.978328	0.982401		1.00764	0.986592		0.173	1.02253		0.103	0.704113		0.082	0.927361		0.08	0.904225
	0.969475	0.94257		0.979057	0.988382		0.99921	1.08493		0.966496	0.974235		0.055	0.897888		0.046	0.932313		0.065	1.00274		0.144	0.930912
	1.01112	0.980492		1.00288	0.863546		1.03362	1.10403		0.986109	0.991345		0.164	0.895545		0.062	0.795207		0.117	0.986429		0.023	0.92842
	1.04017	1.10515		1.1379	0.861944		0.967819	1.07991		1.02513	1.0573		0.079	0.981206		0.261	0.699553		0.042	1.03048		0.121	0.952496
	0.979938	0.97456		1.05036	1.01791		0.968633	0.936257		0.990882	1.03189		0.05	0.918449		0.093	0.894982		0.06	0.892649		0.033	0.961738
	0.949582	0.844409		1.372	0.938266		0.997355	0.961867		1.05254	1.06709		0.02	0.821231		0.438	0.631564		0.178	0.890656		0.156	0.936286
	1.12513	0.940338		0.984208	0.863584		0.993856	1.04727		1.01282	1.0802		0.149	0.77184		0.065	0.810331		0.161	0.973153		0.072	0.984956
	0.948467	0.828399		0.89647	0.867731		0.99384	1.01982		1.11801	1.3327		0.022	0.806608		0.038	0.893911		0.156	0.947656		0.211	1.10086
	0.976231	0.893673		1.14684	0.856779		0.976636	0.861946		1.04713	1.04621		0.034	0.845418		0.287	0.689939		0.047	0.815065		0.195	0.922712
	1.00057	0.828922		1.00759	0.846787		1.12037	1.2932		0.998171	0.993447		0.143	0.765088		0.04	0.776133		0.222	1.06598		0.102	0.919146
	0.929809	0.847734		1.04492	0.891499		0.985977	0.931046		0.979109	0.992164		0.024	0.841998		0.111	0.787919		0.082	0.872065		0.125	0.935831
	1.08799	0.83573		1.0273	0.880892		0.980255	0.973958		1.04962	1.0678		0.271	0.709392		0.056	0.791899		0.131	0.917584		0.194	0.939509
	0.951739	0.821183		1.01443	0.846359		0.927324	0.946704		1.16964	1.13476		0.027	0.796832		0.15	0.77051		0.02	0.942817		0.354	0.895975
	1.00297	1.0206		1.11473	0.874374		0.95302	0.934384		1.0787	1.12404		0.119	0.939756		0.231	0.724388		0.034	0.905458		0.206	0.962337
	0.948115	0.828842		0.94448	0.879713		0.969081	1.03545		0.9651	0.919689		0.057	0.807338		0.066	0.860188		0.076	0.986767		0.039	0.880063
	1.03009	0.99403		1.12389	0.893817		0.970716	0.910494		0.945932	0.861578		0.195	0.891186		0.034	0.73446		0.047	0.866223		0.102	0.841162
	1.04188	1.1059		1.12504	0.856482		0.935037	0.812154		1.09643	1.09169		0.2	0.980267		0.193	0.703064		0.02	0.802148		0.188	0.91952
	0.951089	0.833755		1.35731	0.917149		0.958431	0.825829		0.97721	1.06846		0.03	0.809585		0.438	0.624029		0.033	0.795746		0.093	1.00975
	0.949982	0.911829		1.01407	0.880965		0.988101	0.9381		0.983958	1.03157		0.066	0.886426		0.111	0.802298		0.11	0.876785		0.087	0.968201
	0.948688	0.817941		1.02379	0.934475		0.925333	0.826694		1.02817	0.960785		0.057	0.796239		0.046	0.842948		0.053	0.825072		0.068	0.862991
	0.988481	0.966631		0.960451	0.913991		0.959312	1.03455		0.990586	0.910288		0.134	0.903103		0.049	0.878843		0.098	0.995951		0.025	0.848656
	1.00429	0.987533		0.990738	0.933669		0.950461	0.873881		0.959629	0.969394		0.137	0.908113		0.026	0.87032		0.041	0.849108		0.126	0.932915
	0.999627	1.13588		0.986814	0.974681		1.04476	0.992861		1.06076	1.12077		0.108	1.0494		0.057	0.912162		0.203	0.87764		0.159	0.975756
	0.976886	0.864509		1.01078	1.01488		0.961134	0.914921		1.0079	0.947933		0.049	0.81728		0.049	0.927266		0.041	0.879114		0.188	0.86857
	0.995303	0.874395		0.973933	0.851214		0.96171	0.819172		0.988378	1.06489		0.064	0.811329		0.057	0.80715		0.024	0.78664		0.079	0.995011
	1.00936	0.942703		1.04611	0.910361		0.991721	0.881941		1.06328	1.01253		0.078	0.862529		0.113	0.803673		0.057	0.821287		0.195	0.87944
	0.970448	1.09724		1.02333	1.02976		0.938014	0.878712		0.983385	1.0092		0.062	1.04418		0.072	0.929319		0.035	0.865131		0.099	0.94776
	0.951056	0.856129		1.19639	0.912968		1.0463	1.04025		1.00978	0.937969		0.079	0.831338		0.084	0.70474		0.232	0.918181		0.05	0.857837
	0.984578	0.893014		0.906102	0.898957		0.938619	0.875566		0.978288	1.02938		0.028	0.837632		0.021	0.916234		0.039	0.861479		0.051	0.971745
	0.959203	0.872495		1.10857	0.870409		0.975701	0.857909		1.07001	1.1016		0.02	0.840035		0.279	0.725114		0.097	0.812025		0.37	0.950782
	0.987649	0.971345		1.0958	0.974211		0.950138	0.926456		1.08088	1.10449		0.078	0.908271		0.143	0.821046		0.048	0.900499		0.186	0.943693
	0.970365	0.976613		0.97434	0.996294		0.946864	0.828527		1.06713	1.11447		0.031	0.929464		0.078	0.944327		0.026	0.808098		0.099	0.964489
	0.991868	1.08169		0.951641	0.874325		0.951797	0.891987		1.05136	1.07312		0.15	1.00714		0.047	0.848486		0.048	0.865484		0.208	0.94263
	1.09362	1.14563		1.21924	0.922318		0.92462	0.813588		1.00338	0.941501		0.324	0.967436		0.466	0.698609		0.037	0.812618		0.024	0.866564
	1.00103	1.09332		1.09604	0.924644		0.962659	0.87556		0.989107	0.884551		0.203	1.00866		0.036	0.779099		0.039	0.83996		0.063	0.825894
	1.01054	1.12563		0.978285	0.898436		0.956449	0.844338		1.04758	1.17819		0.094	1.0287		0.113	0.848138		0.036	0.815267		0.114	1.03866
	0.992893	1.11423		1.16956	0.906323		0.970723	0.827878		0.975197	0.863509		0.117	1.03638		0.238	0.715655		0.12	0.787619		0.083	0.817747
	1.02635	1.0241		0.89642	0.88266		0.987333	0.895125		0.960212	0.899139		0.18	0.921495		0.028	0.909342		0.095	0.837269		0.077	0.864778
	0.994215	0.936979		0.997458	0.967683		1.07309	1.1549		1.02544	1.06495		0.037	0.870351		0.032	0.895949		0.17	0.993921		0.103	0.959098
	0.988846	0.996369		0.919611	0.958868		0.95831	0.853697		1.08286	1.11929		0.063	0.930544		0.036	0.96294		0.034	0.822702		0.112	0.954583
	1.01777	1.1391		1.12789	0.869196		0.936748	0.830897		1.02306	0.9818		0.084	1.0336		0.119	0.711697		0.02	0.819161		0.069	0.886268
	0.960567	0.825481		1.02085	1.15037		0.948931	0.918119		1.0325	1.05425		0.036	0.793642		0.083	1.04069		0.05	0.89353		0.119	0.942967
	0.990201	0.924911		0.920041	1.03393		0.948862	0.827941		1.05888	1.14875		0.064	0.862624		0.034	1.03783		0.058	0.805826		0.082	1.0019
	1.02136	1.10755		0.969412	0.88194		0.98718	1.0886		0.969445	0.891566		0.143	1.00146		0.025	0.840185		0.125	1.0184		0.066	0.849328
	0.962348	0.98977		0.988377	0.853126		1.02532	1.12601		1.02843	0.979586		0.072	0.949833		0.148	0.797142		0.128	1.01421		0.117	0.879653
	0.954575	0.885799		1.04718	0.844433		0.930074	0.815344		1.0576	1.05234		0.022	0.856979		0.056	0.74471		0.033	0.809596		0.136	0.918923
	1.0126	1.09468		1.07009	0.865997		0.950215	0.913401		1.0497	1.06782		0.224	0.99837		0.258	0.747376		0.027	0.887737		0.199	0.939461
	1.11874	1.27538		1.43867	0.943129		0.951897	0.833758		1.01441	1.12861		0.269	1.05283		0.295	0.605416		0.057	0.808901		0.077	1.02748
	0.952595	0.943534		0.930851	0.941216		0.933863	0.920647		1.02285	0.947262		0.028	0.914733		0.058	0.933802		0.032	0.910447		0.037	0.85527
	0.99201	0.894508		1.01099	0.897045		0.960378	0.84551		1.15507	1.12481		0.029	0.832747		0.087	0.81943		0.084	0.813057		0.236	0.899325
	1.07333	1.25458		0.924663	0.848937		1.02165	1.00762		1.0454	1.0419		0.119	1.07947		0.034	0.847885		0.194	0.910839		0.165	0.92042
	0.97748	0.85993		0.932465	0.890705		0.994796	0.904167		0.982699	0.884684		0.073	0.812456		0.045	0.882158		0.133	0.839382		0.07	0.831405
	1.07013	1.26177		0.975777	0.882905		0.937151	0.837548		0.983654	0.936389		0.165	1.0889		0.056	0.835618		0.053	0.825363		0.067	0.879141
	0.933362	1.01055		0.945903	0.876394		0.968139	0.861742		1.03192	1.07075		0.025	0.999889		0.079	0.855653		0.066	0.822023		0.231	0.958269
	0.98367	0.931491		1.01454	0.961967		0.973189	0.921186		1.01141	0.99499		0.105	0.874529		0.049	0.875658		0.037	0.874169		0.104	0.908524
	1.1602	1.60621		1.05045	0.846844		0.94973	1.00141		0.997511	0.986979		0.557	1.27854		0.067	0.744513		0.094	0.973773		0.033	0.913766
	1.00856	1.05444		1.02853	0.88519		0.944028	0.830234		0.972346	0.98247		0.094	0.965534		0.061	0.79481		0.045	0.812196		0.16	0.933133
	0.938316	0.844821		0.958441	0.940484		0.946204	0.849036		0.990487	1.03351		0.034	0.831497		0.079	0.906215		0.025	0.828679		0.034	0.963633
	0.961914	0.827986		1.10531	0.901576		0.946745	0.845216		1.00007	0.903652		0.022	0.794935		0.16	0.753292		0.041	0.82448		0.063	0.834477
	1.05513	1.21197		1.2241	0.905232		1.01384	1.3379		1.03853	1.10431		0.256	1.06079		0.262	0.682947		0.148	1.2187		0.128	0.982015
	0.990462	1.02044		1.03703	0.843708		1.01933	0.825666		1.01187	1.17026		0.044	0.951473		0.14	0.751358		0.113	0.748058		0.039	1.06807
	0.988953	1.03615		0.943817	0.881203		0.936235	0.82643		1.00988	0.934908		0.116	0.967589		0.068	0.862249		0.033	0.815204		0.119	0.85496
	1.03185	1.19383		0.94572	0.890519		0.938954	0.862045		0.991383	1.00282		0.071	1.06849		0.044	0.869612		0.022	0.847872		0.099	0.934174
	0.959105	0.877759		0.969986	0.86566		0.9683	0.832246		1.02964	1.04797		0.078	0.845189		0.041	0.824189		0.039	0.793756		0.192	0.939954
	0.993022	1.09041		0.933642	0.920843		1.08391	1.20103		1.04698	1.12241		0.134	1.01409		0.033	0.910857		0.293	1.02331		0.258	0.990051
	1.00484	1.0962		0.940239	0.907138		0.966779	0.843996		0.939332	0.867927		0.056	1.00748		0.032	0.891006		0.059	0.806228		0.038	0.853314
	0.994372	1.1354		1.05848	0.964465		0.974615	0.848435		1.05666	1.10734		0.099	1.05449		0.17	0.841488		0.04	0.803953		0.288	0.96781
	1.01814	1.09732		1.04907	0.932917		0.9436	0.848325		1.01757	0.981222		0.113	0.99534		0.307	0.821266		0.03	0.83027		0.14	0.89053
	0.997137	1.09946		1.2898	0.959934		0.930296	0.819438		1.07643	1.02477		0.206	1.01828		0.46	0.687329		0.051	0.813468		0.248	0.879196
	1.05956	1.10183		1.09292	0.856512		0.971962	0.949054		0.993667	0.960311		0.23	0.960355		0.218	0.723752		0.07	0.901752		0.087	0.892515
	0.943002	0.838144		0.931152	0.855207		0.939122	0.821599		1.18988	1.25397		0.037	0.820826		0.113	0.848195		0.031	0.807947		0.306	0.973262
	1.00101	1.26299		0.999041	0.885743		0.940602	0.847296		0.992939	1.00714		0.123	1.16521		0.083	0.818784		0.044	0.831905		0.111	0.936726
	0.968247	0.859689		0.946131	0.882416		0.972616	0.830047		0.969215	0.975502		0.046	0.819974		0.107	0.861324		0.127	0.788145		0.116	0.929507
	1.14696	1.21491		1.18368	0.891045		0.944386	0.959677		1.00615	0.925729		0.313	0.978226		0.173	0.695198		0.065	0.938471		0.125	0.849697
	0.958536	0.853535		0.998523	0.92559		0.979518	1.0007		0.973756	0.989274		0.02	0.822353		0.125	0.856063		0.075	0.943485		0.027	0.938235
	0.970962	0.917968		0.966125	0.840036		1.03192	0.839782		1.0377	0.998013		0.033	0.873113		0.053	0.802988		0.159	0.751564		0.119	0.888202
	1.00291	1.03628		1.1189	0.968691		0.956487	0.894123		1.06309	1.11527		0.062	0.954246		0.324	0.79954		0.057	0.863302		0.27	0.96885
	1.03385	1.27396		1.02041	0.924448		1.07663	1.02157		1.04363	1.12481		0.211	1.138		0.08	0.836665		0.22	0.876288		0.105	0.995358
	0.995237	1.0449		0.976541	0.895377		0.98861	1.12999		1.08302	1.15603		0.116	0.9696		0.056	0.846759		0.084	1.05559		0.312	0.985777
	0.980662	1.10779		1.06721	0.873088		0.966683	0.850811		1.02872	1.0111		0.084	1.04324		0.294	0.755533		0.058	0.812819		0.228	0.907699
	1.00197	0.972303		1.15119	0.851225		0.936264	0.857495		1.01741	1.03123		0.031	0.896175		0.269	0.682876		0.031	0.84582		0.247	0.936068
	1.01655	1.02901		1.04777	0.862531		0.939929	0.830072		1.06083	1.04481		0.104	0.934837		0.062	0.760244		0.099	0.815579		0.212	0.90957
	1.03555	0.832579		1.13766	0.941353		1.02896	0.829138		1.00833	0.970384		0.169	0.742504		0.281	0.764159		0.069	0.744172		0.17	0.888759
	1.05901	1.3082		0.964302	0.854206		1.06378	0.817396		1.03678	1.09526		0.136	1.14082		0.063	0.818078		0.212	0.709618		0.152	0.975613
	0.988822	1.14659		0.96192	0.834607		0.936791	0.934428		0.983239	0.900168		0.024	1.07087		0.03	0.801286		0.06	0.921187		0.05	0.845491
	0.946353	0.989268		0.980679	0.879878		0.999544	1.09268		1.02278	1.14787		0.084	0.965397		0.028	0.828591		0.054	1.00957		0.189	1.03647
	1.00125	0.975286		0.933168	0.923993		1.00339	1.13619		1.02148	0.945908		0.063	0.899571		0.041	0.914437		0.101	1.04574		0.021	0.855192
	0.970917	0.87232		0.935602	0.849975		1.34379	0.851627		1.0426	0.994272		0.093	0.829734		0.024	0.838996		0.353	0.585279		0.154	0.880711
	0.9696	0.842199		1.03129	0.866107		1.04704	1.05193		1.03914	1.07149		0.024	0.802172		0.037	0.775593		0.211	0.927831		0.253	0.952269
	0.997654	1.01612		0.929582	0.873915		0.904176	0.83367		1.10666	1.11744		0.029	0.940611		0.05	0.868214		0.034	0.851503		0.231	0.932517
	0.9876	1.03781		1.02258	1.01089		1.01306	1.16829		1.07279	1.16194		0.079	0.970473		0.051	0.912958		0.162	1.06502		0.256	1.00026
	1.01418	0.958957		1.09651	0.903267		0.953305	0.867717		0.945221	0.958169		0.154	0.873231		0.106	0.760765		0.023	0.840604		0.075	0.936168
	0.988953	0.974953		1.03702	0.857891		1.01548	1.15871		1.03254	1.09007		0.062	0.910444		0.183	0.763996		0.136	1.05377		0.203	0.974972
	0.940739	0.868987		1.02677	1.03143		0.927917	0.849592		1.02491	0.880646		0.023	0.85308		0.065	0.927707		0.05	0.845564		0.061	0.793528
	1.02254	1.00275		1.02957	0.966225		0.952735	1.05426		0.984298	0.94849		0.127	0.905645		0.106	0.866693		0.075	1.02193		0.023	0.88992
	1.08812	0.857458		1.14432	0.878494		0.959718	0.86388		1.06266	1.14163		0.238	0.727745		0.03	0.708982		0.023	0.831294		0.077	0.992141
	0.978876	0.902458		1.16283	0.886188		0.94921	1.03903		1.03286	1.02412		0.022	0.851421		0.25	0.703809		0.07	1.01091		0.087	0.915703
	0.999263	0.831737		1.01017	1.00949		0.970968	0.8914		0.971218	1.07728		0.036	0.76869		0.035	0.922902		0.118	0.847837		0.033	1.02437
	1.02044	1.05956		1.1521	0.869937		0.937537	0.813999		1.03841	1.21111		0.147	0.958924		0.25	0.697337		0.03	0.801826		0.148	1.0771
	0.966433	0.925778		0.963351	0.955897		0.968722	0.971498		1.04402	1.14328		0.045	0.884667		0.072	0.916372		0.16	0.926164		0.084	1.01132
	0.994074	1.02261		0.969866	0.883895		1.06709	1.44533		1.01502	1.18857		0.148	0.950027		0.023	0.841654		0.283	1.25087		0.101	1.08142
	0.972277	1.07443		1.03189	0.914772		0.970931	1.04652		1.0478	0.991829		0.059	1.02055		0.036	0.818699		0.093	0.995415		0.148	0.874183
	1.06012	1.1215		0.971962	0.867824		1.27922	0.923432		0.997234	0.98551		0.22	0.976987		0.057	0.824569		0.524	0.666661		0.126	0.91266
	0.96791	0.867626		1.1943	0.933343		0.95363	0.83554		0.954365	0.968412		0.079	0.827832		0.505	0.721724		0.044	0.809155		0.056	0.937109
	1.00871	1.11827		0.933771	0.863127		0.998747	0.968403		1.13666	1.19616		0.126	1.02382		0.027	0.85365		0.1	0.895459		0.264	0.971864
	0.965206	0.955225		0.985937	0.85361		0.985296	0.880686		1.04603	1.0987		0.023	0.913967		0.063	0.799567		0.069	0.825466		0.113	0.970018
	0.98352	0.947269		0.969068	1.03032		0.945344	0.931093		0.91208	0.832994		0.072	0.889478		0.027	0.981891		0.093	0.909596		0.039	0.843439
	0.931883	1.05444		0.996801	0.892959		0.96843	1.06775		0.97355	0.952832		0.049	1.04498		0.047	0.82731		0.058	1.01823		0.086	0.903864
	0.938779	0.852902		0.979284	0.843902		0.952404	0.933769		1.0071	1.03253		0.023	0.839036		0.038	0.795845		0.086	0.905447		0.11	0.946845
	1.13908	1.34095		1.0028	0.903776		0.955129	0.895524		1.00666	1.04004		0.359	1.08718		0.208	0.832325		0.033	0.865885		0.134	0.954141
	1.00164	0.947057		0.955194	0.836399		0.987003	1.10297		0.977405	0.964907		0.099	0.873194		0.141	0.808662		0.117	1.03202		0.043	0.911708
	0.972977	0.864003		1.04172	0.883021		0.966041	1.00469		0.969404	0.882486		0.07	0.820083		0.069	0.782822		0.057	0.960464		0.02	0.840713
	1.0377	1.13293		1.00718	0.951956		0.943784	0.826169		0.996189	1.03432		0.046	1.00827		0.097	0.872883		0.025	0.808428		0.103	0.958869
	0.942961	0.823399		0.985907	0.964314		0.965874	0.847005		1.02105	0.975809		0.034	0.806421		0.091	0.90329		0.121	0.809861		0.192	0.882596
	1.19386	0.977429		1.08432	0.868969		1.02047	0.928337		1.08381	1.10113		0.315	0.756098		0.079	0.740103		0.12	0.840141		0.116	0.93827
	0.958588	0.875861		0.917996	0.870437		0.932437	0.888894		1.07401	1.09891		0.048	0.843817		0.043	0.875673		0.068	0.880391		0.098	0.944928
	0.999604	1.04511		0.967537	0.889098		0.977462	0.833352		1.07651	1.03218		0.046	0.965557		0.058	0.848647		0.027	0.78736		0.096	0.885485
	0.999803	0.88019		0.934312	1.00051		0.92659	0.823718		0.996033	1.0277		0.045	0.813032		0.043	0.988948		0.028	0.820986		0.061	0.952883
	1.33701	1.80747		0.966208	0.974824		0.963019	0.879634		0.968669	0.916215		0.333	1.24847		0.088	0.931752		0.031	0.843552		0.026	0.873508
	0.994746	0.938355		0.898248	0.849757		0.965289	0.967948		1.08415	1.1858		0.072	0.871163		0.118	0.873662		0.118	0.926061		0.201	1.01011
	1.03371	1.11994		0.946864	0.846771		0.984383	1.06234		1.22323	1.29663		0.092	1.00056		0.031	0.825892		0.086	0.996655		0.035	0.978933
	1.04743	0.847732		0.990824	0.952243		0.926157	0.821599		0.972947	0.932248		0.065	0.747447		0.094	0.887556		0.024	0.819257		0.037	0.884886
	1.0306	1.04859		0.974117	0.907193		0.967107	0.895881		1.04574	1.12708		0.024	0.939635		0.026	0.86007		0.067	0.855502		0.273	0.995354
	1.00563	0.988042		0.96961	0.928848		1.08173	1.42895		0.983607	0.945207		0.172	0.907365		0.096	0.884693		0.246	1.21996		0.135	0.887463
	0.962126	0.966871		0.95851	0.931403		0.980475	1.06267		1.02803	1.0577		0.074	0.92807		0.042	0.897399		0.098	1.00093		0.128	0.950176
	0.946009	0.857228		1.03466	0.949932		0.9711	1.07504		1.03945	1.11982		0.04	0.836847		0.185	0.847889		0.051	1.02237		0.203	0.994915
	0.958636	0.904998		0.983095	0.859594		0.917176	0.810057		0.968335	0.930023		0.032	0.871844		0.206	0.8075		0.024	0.815658		0.071	0.886978
	1.04462	1.18243		0.997201	0.928675		0.959164	1.03726		0.951631	1.00267		0.171	1.04535		0.101	0.860055		0.105	0.998715		0.059	0.973048
	0.952018	0.888101		0.969902	0.906063		1.07901	1.187		1.05456	1.04487		0.056	0.861514		0.042	0.862731		0.193	1.01595		0.076	0.915029
	1.00941	1.18051		0.977843	1.00745		0.969751	1.04221		1.01156	1.03213		0.135	1.08007		0.023	0.95148		0.117	0.99252		0.148	0.942299
	0.932813	1.04505		0.999882	1.0737		0.952081	0.835072		1.03459	1.08815		0.105	1.03464		0.13	0.991698		0.027	0.810018		0.151	0.971326
	1.04234	1.1462		0.931532	0.863215		0.974506	0.99338		1.02414	1.05523		0.056	1.01553		0.202	0.855788		0.098	0.941404		0.108	0.951546
	1.0525	1.19477		1.02806	1.03895		0.966882	1.05703		1.17669	1.24932		0.11	1.04834		0.118	0.933299		0.196	1.00962		0.053	0.980518
	1.02297	0.975883		0.926769	0.90907		0.944478	0.973417		1.10847	1.24083		0.073	0.881003		0.024	0.90588		0.129	0.951814		0.218	1.03379
	1.04116	0.981909		0.973305	0.85656		0.951951	0.836463		1.00934	1.1401		0.145	0.87096		0.021	0.812744		0.049	0.811479		0.109	1.04316
	1.02578	1.23327		0.914102	0.902773		0.955771	1.03006		0.952928	0.968475		0.154	1.11031		0.027	0.912072		0.022	0.995299		0.061	0.938584
	1.02933	1.16757		1.20669	0.895507		0.952472	1.05913		0.979959	1.00073		0.146	1.04755		0.348	0.685359		0.043	1.02693		0.058	0.943093
	1.00374	1.09457		0.934035	0.880388		1.01421	0.994174		1.04354	1.00538		0.129	1.00708		0.045	0.870474		0.166	0.905274		0.178	0.889739
	0.955728	0.880202		0.967474	0.981384		0.945558	0.976491		1.1102	1.08082		0.053	0.850537		0.074	0.936795		0.041	0.953729		0.174	0.899077
	1.13283	1.5219		1.03011	0.930336		0.965162	0.921316		1.00288	1.03539		0.329	1.2407		0.145	0.834066		0.102	0.881563		0.161	0.953458
	0.973336	0.977067		0.979142	0.870571		0.916202	0.842311		1.01469	1.04625		0.079	0.927057		0.238	0.821114		0.022	0.849036		0.109	0.952242
	0.965973	0.920879		0.98829	0.901301		0.960128	0.96882		0.981508	0.927512		0.068	0.880406		0.054	0.84223		0.062	0.931877		0.122	0.872712
	1.00136	0.98259		0.954603	0.902695		0.968882	0.875477		1.06802	1.06766		0.113	0.906204		0.077	0.8733		0.071	0.834486		0.082	0.923207
	0.979579	0.957482		0.906817	0.928867		0.949291	0.862592		1.07334	1.03877		0.04	0.902685		0.048	0.945973		0.145	0.839172		0.17	0.893773
	0.958303	0.881693		0.905118	0.847991		0.97907	0.869072		1.07991	1.18809		0.026	0.849688		0.031	0.865229		0.028	0.81976		0.076	1.01603
	0.941449	0.85552		1.01724	0.872009		0.951541	0.922593		0.989181	1.08173		0.043	0.839225		0.172	0.791669		0.058	0.895422		0.091	1.00992
	0.994803	0.925269		0.981182	0.980315		0.961592	0.979704		0.972866	1.04784		0.033	0.858966		0.147	0.922701		0.152	0.940911		0.101	0.994683
	0.981076	1.10775		1.00965	0.993441		0.947483	0.902755		1.0475	1.0933		0.069	1.04276		0.224	0.908686		0.024	0.87992		0.133	0.9639
	0.965404	0.836019		1.14273	0.915604		0.945752	0.942657		1.05554	1.01786		0.034	0.799746		0.338	0.739962		0.127	0.920495		0.123	0.890545
	1.03071	1.2468		0.940385	0.86095		1.00838	1.07544		0.992839	0.981011		0.132	1.11713		0.077	0.845507		0.158	0.984935		0.148	0.912515
	1.07425	1.16486		0.94326	0.918847		1.00425	0.820553		0.995218	1.03761		0.349	1.00141		0.041	0.899615		0.158	0.75459		0.089	0.962856
	0.976721	0.840312		0.946417	0.942732		0.93358	0.829914		1.08937	1.13871		0.022	0.794539		0.094	0.919921		0.043	0.820968		0.072	0.96534
	0.987025	1.17965		0.974569	0.890839		0.956434	0.916457		1.15372	1.26229		0.045	1.10375		0.055	0.844173		0.102	0.884916		0.167	1.01043
	1.0072	1.06744		0.924618	0.832717		1.1153	0.822401		1.01468	1.04803		0.157	0.97876		0.028	0.831725		0.066	0.680984		0.103	0.953872
	1.01377	0.964689		1.07861	0.930851		1.01907	1.07563		0.979864	0.911818		0.149	0.878808		0.138	0.797002		0.19	0.974772		0.091	0.859384
	0.97324	0.944163		0.950712	0.870785		0.96178	1.02663		0.98203	1.06689		0.02	0.895926		0.034	0.845877		0.101	0.985785		0.11	1.00332
	1.07125	0.98942		0.952028	0.92553		0.954327	0.941956		0.95259	0.881738		0.184	0.852975		0.102	0.897812		0.072	0.911545		0.034	0.854828
	0.948688	1.12568		0.919922	0.872941		0.92475	0.846094		1.01781	0.927466		0.09	1.09581		0.03	0.876353		0.05	0.844965		0.167	0.841546
	0.97974	1.05161		1.02454	0.907145		0.932399	0.958774		1.00904	1.02574		0.052	0.991267		0.386	0.817699		0.03	0.949641		0.163	0.938801
	0.965398	0.836663		0.933607	0.965587		0.964531	0.874047		0.995076	0.963573		0.02	0.800367		0.119	0.955152		0.068	0.836881		0.064	0.894279
	0.944806	0.948604		0.927391	0.945825		0.969056	0.99448		1.09916	1.09705		0.051	0.927229		0.046	0.941874		0.099	0.947746		0.076	0.921748
	0.952866	0.895471		0.929953	0.913532		0.957429	0.85308		0.98697	0.987632		0.053	0.86789		0.023	0.90721		0.105	0.822863		0.079	0.924136
	1.02058	1.06257		0.950315	0.953013		0.965045	0.937936		1.04602	1.06406		0.214	0.961514		0.071	0.926138		0.079	0.897575		0.145	0.939441
	0.952083	0.827022		0.932049	0.981964		0.933341	0.910765		0.989068	1.0366		0.041	0.802209		0.046	0.972976		0.093	0.901179		0.07	0.9679
	1.03863	0.989945		0.916713	0.936641		0.980506	1.04733		1.03792	1.12205		0.114	0.88023		0.064	0.943593		0.178	0.98646		0.151	0.998377
	0.994284	0.99865		0.920493	0.855698		0.927368	0.860141		1.00891	0.990722		0.122	0.927573		0.034	0.858509		0.103	0.856569		0.125	0.906867
	0.977268	1.0312		0.92139	1.00569		0.919987	0.976801		1.14246	1.17762		0.098	0.974483		0.031	1.00801		0.051	0.980549		0.107	0.951935
	0.992229	0.867113		1.04612	0.924924		0.993921	0.927749		1.03611	1.01286		0.119	0.807065		0.254	0.816525		0.084	0.862032		0.16	0.902795
	0.998058	1.18588		0.948839	0.839883		0.97266	0.937496		1.03208	1.04174		0.13	1.09731		0.034	0.817468		0.111	0.890129		0.115	0.932158
	1.022	1.19926		0.919803	0.893796		0.927322	0.991229		1.09038	1.11138		0.172	1.08369		0.031	0.897405		0.05	0.987161		0.138	0.941303
	1.00101	1.0189		1.09212	0.988383		0.933587	0.838218		1.0548	1.16455		0.118	0.940022		0.151	0.835796		0.078	0.829177		0.29	1.0196
	0.96757	0.831326		0.913366	0.898955		0.960636	0.955589		1.02425	1.00835		0.069	0.793477		0.049	0.908946		0.077	0.918665		0.173	0.909181
	1.02952	1.05419		1.04051	0.907559		0.938	0.895079		1.08091	1.11807		0.162	0.945642		0.351	0.805512		0.029	0.881259		0.147	0.955267
	0.976393	0.934173		0.916896	0.871383		1.02208	1.15434		1.005	1.01342		0.07	0.883584		0.038	0.877675		0.128	1.04303		0.04	0.931256
	1.03507	1.0556		0.905769	0.848458		0.932755	0.947179		1.00523	0.950038		0.129	0.941833		0.029	0.865083		0.064	0.937799		0.095	0.872811
	1.0134	1.21561		0.963007	0.856843		0.975142	1.00313		0.961145	0.952198		0.193	1.10778		0.02	0.821706		0.087	0.950019		0.082	0.914921
	0.965827	1.0009		0.989105	0.861389		0.920306	0.906604		0.998014	0.862298		0.127	0.957055		0.044	0.804269		0.021	0.909767		0.034	0.797932
	0.976819	0.929012		0.922074	0.843366		0.948356	0.893227		1.0374	1.0601		0.052	0.878318		0.032	0.844685		0.074	0.869832		0.123	0.943721
	0.937026	0.826394		0.9802	1.02573		0.969599	1.00932		1.06655	1.04438		0.026	0.81448		0.115	0.966418		0.124	0.961351		0.197	0.90432
	1.04189	1.03259		0.953833	0.966117		1.00542	1.21416		1.09958	1.17498		0.14	0.915278		0.076	0.935411		0.139	1.11525		0.091	0.986848
	1.06758	1.10052		0.907372	0.889559		0.922653	0.911126		0.977917	0.945582		0.143	0.95201		0.023	0.905387		0.115	0.911979		0.025	0.892981
	0.955446	0.97421		0.95043	1.01189		0.989243	1.03689		0.967055	1.04033		0.021	0.941654		0.06	0.983234		0.149	0.967994		0.043	0.993496
	1.05153	1.30453		0.930166	0.92014		0.987246	0.990192		1.07607	1.07666		0.22	1.14572		0.04	0.913563		0.143	0.926273		0.183	0.924026
	1.02242	1.1467		0.996267	0.915065		1.01739	1.01637		0.959778	1.0786		0.081	1.03578		0.099	0.848244		0.135	0.92259		0.022	1.03785
	0.953365	0.843995		0.963488	0.887272		0.98782	1.07661		1.04691	1.14712		0.026	0.817572		0.02	0.850463		0.17	1.00652		0.061	1.01192
	1.03907	1.06587		0.935464	0.968718		0.950544	0.850309		1.08104	1.17009		0.204	0.947345		0.075	0.956347		0.021	0.826132		0.245	0.999588
	1.1276	1.65648		0.941628	0.918258		0.961805	1.1016		0.982422	1.12882		0.194	1.35667		0.057	0.900597		0.032	1.05774		0.089	1.06114
	1.00569	0.95677		0.984245	0.973013		0.95563	0.987812		0.919488	0.986298		0.225	0.878595		0.131	0.912977		0.107	0.954617		0.025	0.99062
	1.0387	1.16181		0.918883	0.881219		0.975322	1.11889		0.985856	0.903876		0.154	1.03297		0.054	0.885662		0.092	1.05946		0.032	0.846721
	0.986954	0.988827		0.940486	0.875593		0.965903	1.03433		0.984672	0.954755		0.074	0.92527		0.079	0.859795		0.112	0.988943		0.093	0.895457
	0.999281	1.08663		0.962295	0.93592		0.966694	0.942754		1.00924	1.04443		0.125	1.00425		0.05	0.898205		0.042	0.900646		0.213	0.955711
	1.01668	1.16242		0.966047	0.943489		0.959794	0.942104		1.07343	1.15113		0.126	1.0559		0.09	0.901953		0.024	0.906496		0.211	0.990363
	1.06211	1.27965		0.949222	1.14115		1.01822	1.11135		1.08987	1.21108		0.161	1.11267		0.068	1.11025		0.127	1.00799		0.201	1.02623
	0.941107	0.913243		0.953094	0.929302		0.993467	1.01055		1.00936	1.02863		0.079	0.896174		0.04	0.900463		0.167	0.939393		0.084	0.941154
	1.02015	1.09639		0.949429	0.916033		0.946663	0.878076		0.997845	1.00357		0.08	0.99253		0.037	0.891032		0.053	0.856607		0.119	0.928819
	1.0259	1.1196		0.952124	0.876892		0.931921	0.951433		0.981873	0.989293		0.229	1.00786		0.033	0.850545		0.046	0.942853		0.102	0.930496
	1.01946	1.18214		0.923574	0.841686		0.926661	0.818286		1.06564	1.10353		0.06	1.07088		0.025	0.841634		0.022	0.81551		0.165	0.956349
	0.9439	0.904276		0.954854	0.881664		0.989763	0.967787		1.00978	1.09891		0.032	0.884749		0.042	0.852729		0.121	0.903012		0.022	1.00502
	0.961187	0.852417		0.943769	0.950257		0.946197	0.990824		0.971203	0.932339		0.025	0.819011		0.065	0.929866		0.034	0.967074		0.077	0.886561
	1.10389	1.5746		0.96	0.838744		1.01262	1.09509		1.06689	1.16776		0.227	1.31731		0.044	0.806869		0.14	0.998727		0.163	1.01083
	1.03052	1.13608		0.904937	0.895129		1.03804	1.14133		1.04026	1.1407		0.105	1.01812		0.036	0.913508		0.148	1.01541		0.159	1.01268
	1.06646	0.951123		0.997396	0.974106		0.95483	0.936935		1.05378	1.10927		0.257	0.823637		0.082	0.901952		0.038	0.90621		0.17	0.972142
	1.13706	1.54465		0.948315	0.89997		0.981839	1.14472		1.0233	1.03142		0.247	1.25456		0.047	0.876437		0.098	1.07672		0.15	0.930848
	0.973023	0.855779		0.964575	0.880542		0.950707	0.828261		1.01558	0.991718		0.055	0.812238		0.088	0.843061		0.056	0.804573		0.113	0.901822
	0.983965	1.10448		0.909066	0.961567		0.962782	1.00877		1.03391	1.06134		0.066	1.03663		0.043	0.976852		0.13	0.967634		0.179	0.94802
	1.05976	1.13216		0.941527	0.880681		0.988802	1.12548		1.04955	1.07474		0.194	0.986606		0.024	0.863835		0.047	1.05117		0.101	0.945679
	0.937674	0.84697		0.929732	0.854063		0.909479	0.871419		0.943448	0.89081		0.042	0.834183		0.047	0.848353		0.057	0.88487		0.027	0.871991
	0.942189	0.836301		0.945701	0.865174		0.975432	0.931248		1.06419	1.08242		0.026	0.819727		0.044	0.844879		0.032	0.881684		0.138	0.939338
	0.967844	0.891417		0.894169	0.905314		0.935982	0.963384		0.971421	0.900649		0.058	0.850591		0.044	0.935028		0.023	0.950554		0.027	0.856235
	0.996451	0.986927		0.953454	0.969902		0.926947	0.895625		0.972307	1.0574		0.109	0.914691		0.138	0.939448		0.056	0.892311		0.145	1.00434
	1.02105	1.1365		0.964618	0.907482		0.911913	0.949775		1.00208	1.11008		0.084	1.02794		0.083	0.868815		0.03	0.961861		0.062	1.02305
	1.08294	1.48573		0.984878	1.07217		0.970283	0.923471		1.00719	0.954131		0.226	1.26702		0.103	1.00537		0.125	0.878962		0.166	0.874869
	1.01868	1.11817		0.986745	0.864471		0.972746	0.843059		0.955548	0.903407		0.201	1.01372		0.049	0.809078		0.022	0.800394		0.026	0.873124
	0.981326	0.982709		0.976388	0.88264		0.952197	0.832532		1.10658	1.11693		0.089	0.924819		0.085	0.834846		0.06	0.807457		0.192	0.93215
	1.06524	0.999503		0.952592	0.865283		1.144	0.834934		0.988975	0.918816		0.222	0.866529		0.033	0.838874		0.221	0.67402		0.112	0.858002
	0.971484	1.00408		0.975703	1.1036		0.944511	1.02277		0.970898	0.950307		0.056	0.954506		0.075	1.04457		0.021	1.00004		0.062	0.903931
	1.0678	1.3174		0.98557	1.05017		0.995575	0.859407		0.990407	0.941741		0.188	1.13938		0.124	0.984049		0.122	0.797205		0.152	0.878137
	0.991343	1.07183		0.965793	1.00978		0.917733	0.831278		1.00278	1.04381		0.045	0.998499		0.093	0.965582		0.027	0.836517		0.045	0.961306
	1.02279	1.14164		0.93475	0.915818		0.988614	1.04084		0.985368	1.03612		0.063	1.03084		0.053	0.904813		0.097	0.972305		0.047	0.971085
	0.999503	1.16245		0.941397	0.846355		1.02441	1.17349		0.982871	0.988211		0.094	1.07408		0.03	0.830281		0.139	1.05791		0.112	0.928534
	0.967416	0.921035		0.926143	0.935002		0.940991	0.947094		1.0101	0.957371		0.079	0.879241		0.038	0.932351		0.087	0.929507		0.123	0.875306
	0.966012	0.957722		0.965219	0.918034		1.19131	0.822079		0.958563	0.881259		0.03	0.915592		0.076	0.878371		0.335	0.637285		0.027	0.84904
	1.05157	1.40737		0.960801	0.937013		0.943401	0.821147		1.04219	1.08129		0.111	1.23599		0.055	0.900653		0.054	0.803839		0.17	0.95816
	0.963334	0.843524		0.932388	0.962309		0.930247	0.850518		1.05113	1.05417		0.058	0.808659		0.05	0.953153		0.03	0.844364		0.165	0.926195
	1.11288	1.57158		0.939248	0.905271		0.998359	1.05787		0.999534	1.09851		0.103	1.30417		0.057	0.89011		0.146	0.978568		0.046	1.01497
	1.03579	1.13737		0.905069	0.927226		0.998053	1.0602		1.1065	1.15862		0.102	1.01409		0.052	0.946126		0.051	0.981025		0.17	0.967018
	0.997179	1.07154		0.98394	0.911152		0.943464	0.851565		1.05353	1.07878		0.085	0.992387		0.028	0.855199		0.028	0.833561		0.184	0.945651
	1.02134	1.12274		0.973976	0.876702		0.940594	0.950152		1.14562	1.177		0.139	1.01521		0.032	0.831283		0.119	0.932902		0.274	0.948818
	1.03299	1.16749		0.994518	0.930111		0.977525	1.04354		0.976251	1.03107		0.244	1.04376		0.035	0.863708		0.03	0.985881		0.066	0.975372
	1.21444	1.71877		1.00673	1.06167		0.94137	0.872213		0.972144	1.0523		0.28	1.30703		0.033	0.973912		0.149	0.855671		0.041	0.99966
	1.01316	1.03621		0.943764	0.937931		0.92511	0.926101		0.949074	0.883612		0.146	0.944524		0.028	0.917809		0.087	0.924507		0.106	0.859817
	0.978723	1.20846		0.981874	0.880238		0.91301	0.855941		1.05466	1.10201		0.096	1.14029		0.035	0.827923		0.024	0.865791		0.283	0.964978
	1.11821	1.49474		0.938631	0.878522		0.978115	1.00325		0.968406	0.93358		0.211	1.23449		0.043	0.864376		0.055	0.947246		0.056	0.890305
	1.02169	1.18215		0.97344	0.905774		0.944561	1.05661		1.01664	1.03767		0.127	1.06856		0.091	0.859321		0.069	1.03307		0.085	0.942625
	1.02759	1.42683		0.963195	0.839355		1.03622	1.12929		1.01072	1.1155		0.027	1.28232		0.027	0.804778		0.151	1.00647		0.14	1.01925
	1.01956	1.12272		0.955056	0.853745		1.40241	0.85218		1.02844	0.942615		0.058	1.01696		0.032	0.825552		0.418	0.561179		0.047	0.846451
	0.952578	0.893767		0.966971	1.22871		0.9343	0.817717		1.12039	1.23012		0.048	0.866501		0.021	1.17349		0.039	0.808279		0.198	1.01397
	1.03327	1.11655		0.963713	0.941535		0.986548	1.02517		0.99125	0.909412		0.179	0.997954		0.028	0.902264		0.097	0.959672		0.19	0.847271
	1.08432	1.49632		1.05729	1.41971		0.956869	0.809602		0.939713	0.852615		0.236	1.27442		0.428	1.24008		0.022	0.781383		0.02	0.83792
	0.967888	1.18943		0.960186	0.935393		0.934913	0.810418		1.00301	1.02389		0.034	1.1349		0.037	0.899671		0.037	0.80054		0.159	0.94274
	0.976638	0.852972		0.97224	0.931466		0.950899	0.821077		0.962615	0.902968		0.04	0.806577		0.05	0.884787		0.025	0.797433		0.03	0.866292
	1.24139	1.46644		0.969805	0.856099		0.926392	1.08675		1.06132	1.00909		0.36	1.09094		0.033	0.815238		0.021	1.08338		0.237	0.878065
	0.976722	0.849246		0.976601	0.924708		0.964207	0.912247		0.953424	0.874114		0.041	0.802985		0.026	0.874445		0.099	0.87375		0.031	0.846694
	0.985246	1.02615		0.956237	0.995705		0.943511	0.951462		1.02144	0.999942		0.052	0.96186		0.079	0.961634		0.055	0.9313		0.099	0.904076
	0.947875	0.838798		0.971528	1.0895		0.958152	0.825033		0.961964	1.06261		0.045	0.817243		0.127	1.03566		0.048	0.795209		0.035	1.02014
	1.04955	1.16074		0.994959	1.16544		0.919524	0.811466		1.05189	1.11109		0.193	1.02136		0.067	1.08176		0.025	0.81499		0.28	0.975493
	0.971129	0.904522		0.935849	0.884887		0.953709	0.894489		1.03317	1.06016		0.026	0.860176		0.037	0.873226		0.079	0.866172		0.109	0.947644
	1.02615	0.965414		0.909094	0.850594		0.965963	1.03303		0.939556	0.924874		0.023	0.868856		0.034	0.864089		0.069	0.987634		0.026	0.909086
	0.945887	0.874533		0.929208	0.974332		0.965348	1.01757		0.997945	0.932103		0.021	0.853851		0.042	0.968365		0.096	0.97348		0.036	0.862585
	1.01766	1.08314		0.91159	0.920328		0.896884	0.867915		1.14535	0.962256		0.134	0.982946		0.033	0.932369		0.058	0.893688		0.329	0.775883
	1.04471	1.22844		0.917901	0.853689		0.939196	0.821192		1.07195	1.11416		0.328	1.08593		0.03	0.858912		0.08	0.807484		0.081	0.959876
	0.96455	0.819129		0.951057	0.89621		0.963733	1.04088		0.954458	0.888081		0.05	0.784282		0.073	0.870258		0.035	0.997444		0.042	0.859291
	0.98553	0.977556		0.936634	0.890417		0.975567	1.03148		1.02143	1.09562		0.046	0.916045		0.021	0.877947		0.08	0.976447		0.11	0.990594
	0.967613	0.909984		0.903753	0.84474		0.945756	0.902176		0.971338	0.986199		0.218	0.868515		0.031	0.863214		0.026	0.880962		0.046	0.937647
	1.06202	1.12369		0.997642	1.11198		0.965557	0.846799		0.959341	0.972223		0.204	0.977143		0.171	1.02936		0.1	0.809929		0.054	0.935918
	0.985152	0.866082		0.942629	0.853811		0.989582	1.06165		1.13723	1.17824		0.116	0.811897		0.065	0.836499		0.144	0.990774		0.276	0.956823
	0.97092	1.08078		0.967228	0.9523		0.98333	1.01513		0.970712	0.889063		0.106	1.02801		0.067	0.909264		0.131	0.953387		0.028	0.845838
	0.959906	0.867272		0.974652	0.883268		0.965789	0.860903		1.06685	1.11305		0.023	0.834395		0.022	0.836928		0.02	0.823222		0.183	0.963507
	1.00207	1.14878		0.978402	0.954202		0.982302	0.881701		1.00524	1.02095		0.138	1.05872		0.08	0.900675		0.048	0.828936		0.164	0.937948
	0.97364	0.885839		0.931383	0.953264		0.894255	0.808889		1.01866	0.938299		0.02	0.840235		0.051	0.945214		0.03	0.835357		0.039	0.850666
	1.05985	1.24271		0.947561	0.916538		0.959916	1.00413		0.969674	0.947466		0.278	1.08286		0.025	0.893282		0.095	0.966051		0.057	0.902367
	1.10936	1.29293		0.971748	0.898986		0.953007	1.00298		0.956771	0.815616		0.372	1.07633		0.057	0.854367		0.085	0.971939		0.051	0.787268
	0.984197	0.997276		0.901111	0.958191		0.962103	0.881595		0.949375	0.943138		0.093	0.93579		0.04	0.982016		0.062	0.846237		0.022	0.91745
	0.934994	0.828642		1.00015	1.28424		0.947333	0.818681		1.03409	1.18222		0.022	0.81847		0.143	1.18583		0.028	0.7981		0.081	1.05581
	1.03765	1.18637		0.951589	0.882507		0.946048	0.892921		0.988807	0.97296		0.162	1.05588		0.11	0.856473		0.044	0.871655		0.02	0.908716
	1.12027	1.21086		0.925503	0.895428		0.962672	1.14153		1.02565	0.976326		0.245	0.998193		0.064	0.893506		0.05	1.0951		0.088	0.879107
	0.960819	0.917205		0.929705	0.912677		0.954265	0.943229		0.979295	1.04361		0.035	0.881596		0.077	0.906601		0.088	0.912837		0.055	0.984165
	1.10437	1.20146		0.891688	0.91369		0.999482	0.974258		1.0181	1.05515		0.385	1.00471		0.062	0.946304		0.131	0.90021		0.078	0.957123
	0.962652	1.0199		0.961681	0.909434		0.960123	0.925101		0.983164	0.906645		0.076	0.978438		0.022	0.873344		0.103	0.88983		0.049	0.85164
	0.991135	1.06001		0.951715	0.955661		0.944815	0.839486		0.987907	1.00687		0.117	0.987689		0.044	0.927346		0.119	0.820563		0.059	0.941241
	1.25704	0.86175		0.985711	1.05029		0.958355	1.00211		1.08872	1.06781		0.278	0.633106		0.131	0.984018		0.029	0.965685		0.138	0.905786
	0.991019	1.11304		0.954562	0.863529		0.882615	0.844499		0.940171	0.953834		0.11	1.03723		0.03	0.835444		0.027	0.883635		0.091	0.936938
	1.09771	1.32217		0.958508	0.915191		1.00863	1.12955		1.05189	1.08679		0.222	1.11235		0.052	0.881781		0.246	1.03423		0.134	0.954163
	1.49104	0.848035		0.91534	0.834756		0.958247	0.938155		1.00112	0.919751		0.476	0.525253		0.03	0.842213		0.098	0.904153		0.055	0.848456
	0.998906	0.958141		0.950737	1.00279		0.956998	0.832919		1.0262	1.12023		0.091	0.885829		0.025	0.974077		0.054	0.80378		0.125	1.00814
	1.02817	1.02987		0.941893	0.989243		0.967952	0.951441		1.017	1.15682		0.109	0.925044		0.073	0.969944		0.136	0.907764		0.131	1.05049
	0.955097	1.01909		0.930475	1.01458		0.99296	1.06391		1.05419	1.12016		0.042	0.985394		0.049	1.007		0.107	0.989503		0.12	0.981302
	0.981625	0.865028		1.03115	1.24756		0.971224	0.841872		1.03499	1.13768		0.06	0.813822		0.114	1.11733		0.057	0.800519		0.171	1.01514
	1.18817	0.832217		0.958445	0.881744		0.904884	0.819645		1.00648	1.03852		0.026	0.64685		0.029	0.849612		0.026	0.836523		0.153	0.952912
	1.05304	1.10243		1.04543	1.53588		0.939369	0.942004		1.02625	1.04169		0.255	0.966825		0.291	1.35678		0.096	0.926107		0.082	0.937405
	1.04742	1.26695		0.904462	1.14107		0.943947	0.912005		1.0309	1.02345		0.159	1.11708		0.057	1.16511		0.061	0.892266		0.103	0.916845
	1.07293	1.04813		0.93665	0.928336		0.89746	0.920327		1.0118	0.962895		0.186	0.902174		0.031	0.91532		0.02	0.947048		0.088	0.878876
	1.26108	0.859424		0.909722	1.23205		0.93852	0.981555		1.00278	0.991981		0.183	0.629375		0.037	1.25073		0.103	0.965864		0.16	0.913576
	1.00149	1.03342		0.990096	1.24614		1.01887	1.02466		1.05153	1.04259		0.062	0.952965		0.093	1.16234		0.159	0.928767		0.191	0.91567
	1.02495	0.978458		1.06279	1.37822		0.966492	0.880948		1.00361	0.978229		0.025	0.881626		0.117	1.1976		0.068	0.841777		0.114	0.900159
	1.13113	1.12274		1.13637	1.61063		0.957238	0.85829		1.07341	1.13007		0.448	0.916669		0.204	1.30894		0.034	0.828055		0.176	0.972264
	0.965514	0.93598		0.939666	0.873487		0.943357	0.864653		0.963822	0.973624		0.098	0.895268		0.021	0.858475		0.034	0.846468		0.074	0.932909
	0.973229	0.855382		0.970306	1.16019		0.939358	0.876726		1.0651	1.03438		0.076	0.811689		0.127	1.10424		0.095	0.861941		0.158	0.896878
	1.01428	1.07276		1.14087	1.45915		0.986902	0.992413		1.15373	1.26159		0.138	0.976765		0.361	1.18116		0.128	0.928674		0.271	1.00985
	0.980522	0.864536		0.98849	0.99999		1.07161	0.829226		0.984303	1.01549		0.028	0.814274		0.047	0.934262		0.233	0.714631		0.095	0.952774
	1.25801	0.886426		0.936112	1.2675		1.30031	0.819399		1.05887	1.17509		0.419	0.650734		0.06	1.25044		0.376	0.581962		0.118	1.02488
	0.978351	0.864074		0.932702	0.930662		0.928563	0.840132		0.962265	0.939802		0.089	0.815645		0.217	0.921497		0.045	0.835567		0.079	0.901958
	0.967186	0.842021		0.899008	0.848709		0.992154	1.03043		1.00727	1.01982		0.032	0.804003		0.058	0.871847		0.143	0.95915		0.112	0.93503
	1.10266	1.22849		0.925883	1.12844		0.960103	0.809158		1.04621	1.05805		0.261	1.0289		0.056	1.12556		0.049	0.778324		0.149	0.933965
	1.01252	0.967213		0.897891	0.835998		0.898411	0.889582		0.959371	0.903744		0.097	0.882193		0.052	0.859858		0.038	0.914441		0.09	0.869969
	1.27233	0.864555		0.961202	0.897077		0.966684	0.82097		1.02739	1.09486		0.077	0.627535		0.056	0.861906		0.041	0.78431		0.111	0.98417
	0.968828	1.04179		0.965079	1.27898		0.963645	0.99689		0.952162	0.949596		0.085	0.993068		0.141	1.2239		0.034	0.955378		0.023	0.921029
	0.990189	1.02441		0.862886	0.844175		0.98726	0.981596		1.03748	1.11644		0.091	0.955433		0.044	0.903491		0.154	0.918219		0.224	0.993805
	1.12248	1.30025		0.966749	0.938367		0.977819	0.986569		1.05393	1.1011		0.216	1.06978		0.037	0.896405		0.166	0.931781		0.122	0.964846
	1.02054	1.07825		0.902607	0.859193		0.956266	1.04793		1.03872	1.02569		0.079	0.97574		0.162	0.879096		0.05	1.01204		0.033	0.911929
	0.942951	0.867565		0.882509	0.846084		0.927473	0.974259		1.04078	1.07397		0.05	0.849685		0.033	0.8854		0.034	0.970104		0.045	0.952966
	0.950065	1.03254		0.91434	0.855499		0.962839	0.859686		1.00614	1.02192		0.045	1.00368		0.052	0.864085		0.023	0.824577		0.089	0.938005
	0.985571	0.917866		0.916286	0.831519		0.971778	1.03645		0.996929	1.08695		0.08	0.860075		0.025	0.838081		0.084	0.984978		0.116	1.00691
	0.945109	0.866496		0.921718	0.988319		1.01833	1.15387		0.992069	1.04958		0.055	0.846701		0.054	0.990248		0.227	1.04643		0.034	0.977054
	0.967941	0.891155		0.929568	0.982164		0.976749	1.33852		1.0614	0.826796		0.046	0.850255		0.082	0.975771		0.061	1.26557		0.102	0.719393
	0.982094	1.00187		0.851869	0.869285		0.987416	1.03905		1.01737	0.957062		0.097	0.942111		0.038	0.942398		0.267	0.971809		0.029	0.868774
	0.956195	0.834206		0.945084	1.09893		0.95432	1.08016		1.05251	1.0773		0.053	0.805698		0.14	1.07385		0.113	1.0453		0.151	0.945262
	0.966912	0.826666		0.85911	0.838433		0.945332	0.925717		1.03256	0.834922		0.044	0.789565		0.041	0.90129		0.04	0.904356		0.08	0.746753
	0.950941	1.19145		0.942731	0.881199		0.990185	1.05167		1.02721	0.838813		0.034	1.15709		0.06	0.863239		0.126	0.980858		0.102	0.754137
	1.02381	1.04184		0.892552	0.981226		0.962376	1.23859		1.06883	1.06539		0.12	0.939784		0.034	1.01527		0.064	1.18858		0.194	0.920542
	1.14944	1.15088		0.954733	0.868132		0.974408	0.991019		1.01303	1.07852		0.159	0.924675		0.031	0.839748		0.091	0.93926		0.077	0.983218
	0.990253	1.15784		0.972681	0.960196		0.954372	0.829889		0.957585	0.850774		0.084	1.07981		0.054	0.911664		0.034	0.803058		0.022	0.820506
	1.00706	0.94374		0.946115	0.843059		0.964765	1.06939		1.03472	0.904969		0.115	0.865454		0.048	0.822923		0.09	1.02367		0.056	0.807711
	0.999819	1.02156		0.924093	0.864233		0.939094	1.00884		0.988679	0.897558		0.118	0.943601		0.023	0.863695		0.069	0.992105		0.033	0.838401
	0.959579	0.825507		0.926189	0.882336		0.966552	1.14867		1.09195	1.09354		0.023	0.794484		0.026	0.87979		0.094	1.09753		0.21	0.924863
	1.03736	1.05696		0.940363	0.848905		0.91462	0.809093		0.997569	1.03654		0.175	0.940974		0.044	0.833698		0.058	0.816964		0.029	0.959597
	0.953299	0.878212		0.989277	0.871765		0.948172	0.954098		1.06559	1.18943		0.021	0.850776		0.021	0.813817		0.063	0.929289		0.152	1.03085
	1.01932	1.10339		0.966809	0.901116		0.938628	0.821528		1.0183	1.03881		0.111	0.999688		0.031	0.860766		0.033	0.808303		0.089	0.942116
	0.94734	0.967689		0.988884	0.88621		0.968567	0.987791		1.01995	0.93091		0.035	0.943353		0.042	0.827629		0.079	0.941847		0.049	0.842895
	1.05463	1.09411		0.962019	0.87198		0.929959	0.815778		1.01589	0.983268		0.421	0.95809		0.035	0.837081		0.03	0.810127		0.11	0.893861
	0.973164	0.849941		0.957036	0.8687		0.967505	0.892239		0.962593	1.03941		0.034	0.80658		0.037	0.838275		0.07	0.851673		0.033	0.99722
	0.986658	0.924043		0.967648	0.858029		0.936985	1.00559		0.973147	0.925842		0.123	0.864909		0.095	0.818897		0.099	0.991135		0.107	0.878624
	0.993729	0.836484		0.955223	0.913585		0.967991	0.953498		1.04601	0.815361		0.149	0.777382		0.031	0.883262		0.045	0.90969		0.054	0.719877
	1.03748	1.16704		0.960586	0.892319		0.927825	0.904579		1.03568	1.02166		0.129	1.03884		0.089	0.857884		0.038	0.900379		0.14	0.911015
	0.995039	0.87494		0.968597	0.890033		1.01407	0.821977		1.0108	1.06018		0.055	0.812051		0.025	0.848609		0.251	0.748579		0.164	0.968635
	1.04119	1.25212		0.914251	0.846323		0.944198	0.896922		1.00244	0.81584		0.14	1.11061		0.048	0.8549		0.054	0.877276		0.078	0.751606
	0.972136	0.845942		0.953125	0.843426		0.952041	0.964388		0.997598	1.01444		0.034	0.803635		0.031	0.817226		0.096	0.935494		0.143	0.939111
	0.953642	0.825093		0.919634	0.847694		0.965239	0.932444		1.02405	1.03072		0.03	0.799029		0.04	0.851274		0.151	0.89214		0.142	0.929528
	0.95272	0.843799		0.937734	0.885502		0.916013	0.829842		1.11327	1.18744		0.024	0.817935		0.065	0.872077		0.064	0.836641		0.331	0.985047
	1.00788	0.992087		0.931031	0.889838		0.949042	1.05299		0.951066	0.967884		0.096	0.909049		0.029	0.882657		0.038	1.02467		0.04	0.939848
	1.04009	0.847599		0.956901	0.938943		0.888324	0.804313		1.02265	1.13738		0.065	0.752601		0.02	0.906185		0.057	0.836178		0.075	1.02712
	1.02863	1.17162		0.937449	0.843386		0.979009	0.903608		0.962233	0.965168		0.142	1.0519		0.169	0.830852		0.076	0.85239		0.035	0.926334
	1.02438	1.08095		0.937585	0.838924		0.955646	1.0396		0.966664	0.979941		0.143	0.97452		0.087	0.826336		0.076	1.00465		0.052	0.936202
	1.05023	1.08986		0.91961	0.830655		0.97178	0.904428		0.987735	0.981809		0.131	0.958362		0.029	0.834183		0.046	0.85951		0.118	0.917977
	0.9693	0.877848		0.927466	1.05268		0.920419	0.828876		1.00905	1.08342		0.059	0.836385		0.04	1.0482		0.023	0.831666		0.079	0.991583
	0.959668	1.0669		0.958721	1.0427		1.04409	1.07837		0.978231	1.05984		0.062	1.02671		0.047	1.00442		0.24	0.953835		0.072	1.00056
	0.93911	0.82699		0.931164	0.852986		0.965445	1.09303		1.02205	1.18474		0.058	0.813259		0.024	0.845981		0.107	1.04556		0.123	1.07053
	0.998182	1.10825		0.990891	1.03547		0.929765	0.813968		1.04669	1.10211		0.08	1.02535		0.068	0.965062		0.079	0.808498		0.168	0.972419
	1.00008	1.03184		0.946883	0.971894		0.996165	0.997156		1.08598	1.07259		0.204	0.952843		0.125	0.94791		0.108	0.924436		0.17	0.912134
	1.02345	1.16721		0.947229	0.894388		0.907896	0.910597		0.948509	1.0967		0.144	1.05325		0.025	0.871999		0.043	0.926265		0.101	1.0678
	0.96862	0.861777		0.928477	0.881316		0.971861	0.890679		0.971564	0.897658		0.059	0.821649		0.04	0.876609		0.023	0.846373		0.064	0.853266
	0.971424	0.850595		0.927713	0.892112		0.922159	0.969468		1.11461	1.2082		0.039	0.808647		0.035	0.888077		0.034	0.970896		0.224	1.00106
	1.06601	1.25591		0.923797	0.939404		0.942239	0.844525		0.963817	1.07887		0.167	1.08803		0.034	0.93912		0.097	0.827745		0.071	1.03376
	0.966265	0.840903		0.937221	0.858424		1.01392	1.00993		0.9627	0.922073		0.023	0.803701		0.048	0.845873		0.157	0.91988		0.105	0.884544
	0.977555	1.00288		0.940417	0.870649		0.927964	0.825615		1.08833	1.17146		0.088	0.947443		0.068	0.855003		0.056	0.821658		0.145	0.994058
	0.985223	0.988394		0.954704	0.93476		0.972421	0.868898		1.00978	1.14358		0.16	0.92649		0.033	0.904225		0.028	0.8252		0.112	1.04589
	1.01183	1.13055		0.938361	0.922941		1.00154	1.05545		1.01681	1.18492		0.045	1.03188		0.056	0.908341		0.16	0.973228		0.073	1.07621
	0.947215	0.822929		0.968914	0.907486		0.952486	1.03963		1.01269	1.08328		0.035	0.802341		0.052	0.864967		0.04	1.00801		0.116	0.987887
	1.75174	0.951117		1.02767	1.06805		0.950113	1.24046		0.959912	0.995526		0.622	0.501428		0.151	0.959804		0.036	1.20574		0.039	0.95778
	1.00722	1.13395		0.900618	0.834882		0.932729	0.816575		0.965052	0.921352		0.108	1.03971		0.032	0.856109		0.023	0.808511		0.054	0.881698
	0.94811	0.869464		0.999753	0.953868		0.923022	0.813943		1.17277	1.30869		0.025	0.84691		0.056	0.88113		0.02	0.814379		0.222	1.03056
	0.968674	0.955761		0.978899	0.89573		0.947455	0.990367		1.07426	1.16887		0.112	0.911206		0.23	0.845054		0.059	0.965344		0.165	1.00485
	0.968626	0.841364		0.957466	0.886346		0.929785	0.925108		0.996631	0.836842		0.058	0.802182		0.069	0.854919		0.051	0.918872		0.169	0.77545
	0.942615	0.865286		0.899105	0.88427		0.944641	0.908051		0.995054	1.05233		0.024	0.847754		0.028	0.90828		0.033	0.887745		0.088	0.976678
	0.958037	0.902127		0.963651	0.872586		0.952057	0.812824		1.04116	1.05197		0.038	0.869621		0.093	0.836244		0.1	0.788458		0.148	0.933098
	1.05388	1.16687		0.995572	0.924712		0.925685	0.830162		0.999469	1.12809		0.172	1.02253		0.059	0.857785		0.032	0.828218		0.07	1.04236
	1.00202	1.05218		0.980634	0.92373		0.966495	0.9612		1.06578	1.08849		0.156	0.969744		0.059	0.869928		0.132	0.918458		0.192	0.943197
	1.01268	1.07228		0.954489	0.871962		0.962527	1.06289		1.0429	1.06514		0.126	0.97787		0.021	0.843667		0.033	1.01981		0.176	0.94321
	1.00801	1.04844		0.923271	0.99017		0.99052	0.931897		1.03454	1.02504		0.101	0.96056		0.109	0.990435		0.103	0.868859		0.036	0.91504
	0.988232	1.02615		1.10265	1.09552		0.948805	0.852206		1.06658	1.16441		0.083	0.958948		0.206	0.917553		0.025	0.829492		0.096	1.00823
	1.34668	0.899122		0.970891	0.858969		0.936444	0.852132		0.982171	0.952405		0.098	0.616591		0.022	0.817057		0.057	0.840369		0.09	0.895529
	1.03256	0.850835		0.983277	0.914505		0.932279	0.805482		0.942195	0.889486		0.128	0.760979		0.076	0.858925		0.02	0.797912		0.036	0.871853
	0.977552	0.870009		0.9906	0.956447		0.947671	0.812977		1.01672	1.07479		0.028	0.821919		0.13	0.891677		0.096	0.792256		0.139	0.976265
	1.08549	0.840557		0.960064	0.839509		0.955604	1.05767		1.02756	1.02844		0.238	0.715131		0.021	0.80755		0.1	1.02216		0.157	0.924302
	1.00644	1.14801		0.971398	0.897008		0.94812	0.864024		1.01587	1.07851		0.129	1.05343		0.028	0.852794		0.02	0.841603		0.106	0.980455
	1.08162	1.22045		1.00357	0.973055		0.951133	0.976282		1.01226	1.02167		0.326	1.04205		0.142	0.895434		0.041	0.947937		0.075	0.932102
	0.964427	0.879402		0.920925	0.848944		0.998391	0.840924		1.04766	1.12203		0.047	0.842099		0.062	0.851333		0.098	0.77786		0.026	0.989076
	0.965839	0.872494		0.97201	1.00513		0.940051	0.819116		1.05904	1.05757		0.026	0.834262		0.097	0.954989		0.039	0.804709		0.076	0.922234
	1.00215	1.05927		0.955705	0.9267		0.963541	1.05103		0.939464	0.871567		0.163	0.976156		0.175	0.895489		0.054	1.00737		0.035	0.856773
	0.959391	0.831141		0.983653	1.01698		1.06762	1.13211		1.01731	1.03594		0.07	0.800063		0.115	0.954807		0.147	0.979303		0.037	0.940431
	1.01531	1.08818		1.04859	1.12349		0.965925	0.955918		1.04062	1.03412		0.187	0.989801		0.175	0.989487		0.052	0.91395		0.121	0.917747
	1.04954	1.19978		0.970396	1.02694		0.979494	0.816656		1.04143	1.04522		0.169	1.05572		0.02	0.977334		0.121	0.769985		0.199	0.926877
	0.999377	1.02783		0.958606	0.850471		0.938468	1.02665		0.980803	1.06967		0.211	0.94981		0.07	0.81934		0.07	1.01029		0.075	1.0072
	1.02714	1.23373		0.960232	0.871657		0.96601	1.11441		0.976733	0.884327		0.155	1.10926		0.052	0.838328		0.106	1.06539		0.046	0.836146
	1.023	1.18416		0.982949	1.04232		0.954368	0.829125		1.00266	1.03053		0.127	1.069		0.149	0.979297		0.04	0.802323		0.114	0.949189
	0.982814	0.944915		0.987393	0.885217		1.02734	1.18579		1.07087	1.13194		0.085	0.887905		0.047	0.827951		0.163	1.06595		0.193	0.976181
	0.996159	0.993914		1.01989	1.02933		1.17133	1.64175		1.04327	1.07233		0.204	0.921436		0.188	0.932064		0.304	1.29441		0.106	0.949241
	0.95593	0.834164		1.10744	0.947871		0.96753	0.92011		0.981185	1.0226		0.023	0.80588		0.285	0.790448		0.103	0.878254		0.085	0.962495
	1.02326	1.0088		0.987353	0.979401		0.969003	0.887792		0.990456	1.03049		0.137	0.91046		0.115	0.916079		0.029	0.846118		0.104	0.960849
	1	1.06949		0.969766	0.865564		0.945782	0.895402		1.1783	1.26927		0.137	0.987686		0.06	0.824284		0.032	0.874322		0.261	0.994822
	0.978623	0.973988		1.03578	1.05888		1.02006	1.03843		0.996457	1.10041		0.023	0.919144		0.191	0.94411		0.134	0.940147		0.058	1.01986
	0.982872	1.03622		0.9333	0.847795		0.891599	0.807764		1.01199	1.03634		0.111	0.973643		0.022	0.838908		0.063	0.836681		0.079	0.945736
	0.929337	0.872611		0.934024	0.836967		1.05426	1.08048		1.03567	1.12317		0.022	0.867147		0.033	0.827552		0.229	0.946487		0.156	1.00154
	0.962119	0.873804		0.909295	0.895803		0.988528	1.121		1.03997	1.06991		0.034	0.838745		0.036	0.909815		0.033	1.04728		0.116	0.9501
	0.977143	0.846079		1.00115	0.863223		0.924811	0.825344		0.991681	1.04197		0.084	0.799646		0.029	0.796282		0.074	0.824189		0.073	0.970348
	0.965508	0.85291		0.937476	0.877663		0.924286	0.819495		1.1108	1.14488		0.026	0.815816		0.066	0.864595		0.034	0.818813		0.135	0.951853
	1.00331	1.0072		0.954925	0.862355		1.03523	1.07835		1.01593	1.0354		0.127	0.927098		0.028	0.833991		0.148	0.961986		0.138	0.941214
	0.98216	0.900329		0.98952	0.882037		1.08999	0.817318		1.07801	1.06654		0.063	0.846572		0.057	0.823203		0.255	0.692489		0.07	0.913695
	1.0115	1.13517		0.983126	0.994821		0.935244	0.838291		1.09761	1.173		0.074	1.03643		0.046	0.934502		0.02	0.827779		0.309	0.98695
	0.999184	1.02353		0.942496	0.825685		0.925369	0.813408		0.994797	0.96697		0.084	0.946022		0.092	0.809058		0.03	0.81178		0.182	0.897684
	0.995326	1.04825		0.999119	0.849202		0.949808	0.831665		1.13262	1.18047		0.113	0.972621		0.02	0.784944		0.022	0.808645		0.21	0.962533
	0.944584	0.984699		0.978193	0.997179		0.964402	0.861143		1.05529	1.1163		0.064	0.962737		0.097	0.941442		0.021	0.824635		0.162	0.976915
	0.947692	0.888644		0.950252	0.835699		0.944004	0.84982		0.980413	0.856943		0.048	0.865975		0.043	0.812187		0.098	0.831377		0.045	0.807213
	0.98969	1.1677		0.951198	0.95189		0.952635	0.885878		1.01621	1.07074		0.085	1.08962		0.112	0.924188		0.053	0.858801		0.154	0.97307
	0.950085	0.845195		1.07658	0.875528		0.924266	0.923133		1.0098	1.06535		0.022	0.82156		0.204	0.751051		0.037	0.922385		0.126	0.97432
	0.974587	0.920824		0.960945	0.883033		0.940006	0.865751		0.975706	0.861314		0.14	0.872572		0.049	0.848639		0.024	0.850564		0.062	0.815244
	0.952965	0.854733		1.03301	1.17612		0.98711	1.12006		1.00907	1.05396		0.027	0.828321		0.075	1.05146		0.055	1.0479		0.072	0.9646
	0.952229	0.876382		0.975288	1.0276		0.92474	1.04811		1.07369	1.10932		0.047	0.849957		0.029	0.97305		0.024	1.04673		0.068	0.95416
	0.960417	0.895846		0.942488	0.899266		1.02599	1.23502		1.04339	1.1069		0.044	0.861427		0.057	0.881166		0.035	1.11167		0.132	0.979737
	0.98492	0.829871		0.988974	0.991659		1.02194	0.823801		1.02365	1.07488		0.086	0.778134		0.169	0.926024		0.234	0.744459		0.146	0.969734
	0.965936	0.843453		0.983029	0.905994		0.967808	0.965182		1.00098	0.974375		0.042	0.806414		0.099	0.851146		0.179	0.921011		0.194	0.898975
	0.988301	0.975856		1.21462	0.875038		0.99115	1.12203		0.979076	1.01266		0.073	0.911888		0.232	0.665323		0.083	1.04546		0.1	0.9552
	1.03436	1.03347		0.940773	1.00823		0.946346	0.837794		0.943709	0.847943		0.341	0.922723		0.062	0.989738		0.097	0.817584		0.034	0.829799
	1.03131	1.08783		1.03043	1.11276		1.11845	1.57476		0.994708	1.06502		0.141	0.974128		0.147	0.997306		0.307	1.30031		0.06	0.9888
	0.936989	0.88661		0.95766	0.896361		0.970042	1.0226		1.03267	1.09946		0.02	0.873861		0.032	0.864404		0.125	0.973559		0.189	0.983254
	0.952594	0.903332		1.00891	1.14015		0.982301	0.925103		1.0442	1.11178		0.057	0.875759		0.126	1.04365		0.096	0.869742		0.143	0.983286
	0.987697	0.938391		0.961512	0.838134		1.01164	1.20445		1.02019	1.01206		0.09	0.877414		0.058	0.805014		0.158	1.09954		0.104	0.916164
	1.05219	0.827712		1.02108	1.0117		0.917518	0.810038		0.968127	1.00017		0.072	0.726491		0.098	0.915037		0.024	0.815334		0.108	0.954086
	0.960168	1.0453		0.987748	0.866771		0.991865	0.912131		1.10253	1.15458		0.025	1.0054		0.083	0.810406		0.135	0.849278		0.102	0.967119
	0.96707	0.843733		0.971329	0.854988		0.947804	0.867443		1.13626	1.18555		0.062	0.805734		0.075	0.812903		0.052	0.845215		0.177	0.963578
	0.980255	0.946553		0.970748	0.877321		1.02127	0.832864		1.1558	1.25223		0.086	0.891765		0.047	0.834636		0.167	0.753143		0.256	1.00056
	0.94066	0.816759		0.972418	0.83102		0.938222	0.851408		1.07833	1.06841		0.029	0.801874		0.035	0.78923		0.029	0.838063		0.164	0.915025
	1.03515	0.832452		0.993712	0.984782		0.943456	0.809436		0.972303	0.990688		0.258	0.742675		0.11	0.915218		0.033	0.79233		0.085	0.94098
	0.960415	0.84324		0.960087	0.894236		1.0044	1.06429		1.02626	0.996031		0.022	0.810844		0.02	0.860173		0.059	0.978583		0.148	0.896318
	0.964827	0.83194		1.00145	1.05863		0.975184	1.06578		1.15562	1.15967		0.021	0.796319		0.206	0.976245		0.061	1.00932		0.265	0.926759
	0.939253	0.904942		0.940274	0.863201		0.972035	0.945515		0.978836	0.902952		0.077	0.889781		0.057	0.847818		0.071	0.898322		0.05	0.851921
	0.967222	0.9472		1.03122	1.01925		0.979098	1.07856		1.0077	1.02985		0.03	0.9044		0.285	0.912799		0.118	1.01733		0.062	0.943823
	0.976104	0.914329		0.957928	0.911084		0.929675	0.86636		1.00318	0.922955		0.076	0.86507		0.089	0.878356		0.038	0.860621		0.028	0.849664
	0.981119	0.96313		0.958187	0.848991		0.916546	0.813706		0.987329	0.892225		0.032	0.906584		0.025	0.818272		0.021	0.819895		0.03	0.83456
	0.985099	0.930479		0.927692	0.846883		0.965655	0.963558		1.0133	0.906904		0.079	0.872311		0.051	0.843073		0.13	0.921511		0.064	0.826545
	1.04667	0.835408		0.991449	1.07885		1.02173	0.811815		1.02352	0.99061		0.048	0.737111		0.122	1.00493		0.094	0.733781		0.101	0.893821
	1.038	0.860002		0.957908	0.898653		0.946156	0.870212		1.13184	1.36867		0.191	0.765151		0.094	0.866389		0.028	0.84939		0.154	1.11676
	1.03196	0.833484		0.980896	0.939876		0.936806	0.822902		1.0597	1.13539		0.072	0.7459		0.182	0.884896		0.047	0.811229		0.288	0.989478
	0.971565	0.88882		0.9778	1.0252		0.924064	0.813321		1.19912	1.24733		0.071	0.844864		0.058	0.968286		0.041	0.812839		0.261	0.960649
	1.09426	1.42396		1.0051	0.969271		0.9271	0.839904		1.02166	1.09739		0.268	1.20177		0.158	0.890597		0.046	0.836658		0.174	0.99197
	0.969325	0.940544		0.956367	0.952888		1.00307	0.936809		1.00273	1.05019		0.051	0.896095		0.032	0.920158		0.119	0.862508		0.102	0.967225
	1.01735	1.12149		0.947015	0.853981		0.916798	0.886202		0.994375	0.978449		0.143	1.01805		0.036	0.832791		0.051	0.892697		0.072	0.908726
	1.43896	0.828156		0.971659	1.07726		0.995512	0.904214		1.06514	1.10203		0.3	0.531507		0.091	1.02389		0.123	0.838822		0.154	0.955506
	0.969728	0.912207		0.94397	0.943004		0.935991	0.809173		0.97875	1.01806		0.07	0.868737		0.021	0.922572		0.021	0.798389		0.046	0.960606
	0.964505	1.21138		1.00844	1.10672		0.984941	1.00777		1.01153	0.931233		0.104	1.1599		0.181	1.01352		0.089	0.94492		0.029	0.85021
	0.973039	0.824296		0.987338	0.865893		0.956127	0.850474		0.998432	1.09153		0.07	0.782344		0.044	0.809922		0.035	0.821467		0.071	1.00963
	0.981927	0.96538		0.9657	0.952924		0.941979	0.823102		1.10836	1.11936		0.035	0.907955		0.059	0.911299		0.033	0.80697		0.323	0.932681
	1.02288	1.12721		0.949623	0.929159		0.959455	0.848185		1.03701	1.08849		0.021	1.01771		0.145	0.903616		0.062	0.816415		0.156	0.969362
	0.885697	0.918221		1.01076	1.01766		0.929649	0.886045		1.04995	1.04667		0.036	0.957431		0.141	0.929823		0.073	0.880201		0.115	0.92063
	0.874473	0.810533		0.952605	0.90085		0.971069	0.80808		0.957584	0.895425		0.029	0.855992		0.046	0.873342		0.033	0.76851		0.049	0.863569
	1.01103	0.82702		0.994424	1.1849		0.938436	1.02009		0.997824	1.08495		0.191	0.755434		0.079	1.10041		0.161	1.00387		0.101	1.00415
	1.04378	1.41838		0.981843	0.983066		0.917568	0.881696		1.02287	1.02702		0.029	1.25496		0.05	0.924668		0.071	0.887412		0.111	0.927266
	0.95061	0.906169		1.00667	1.00829		0.940257	0.81719		0.989987	1.09772		0.026	0.880342		0.154	0.925003		0.022	0.802641		0.118	1.02401
	0.945967	0.814876		0.976397	1.01578		0.93166	1.11562		1.03422	1.06682		0.029	0.795537		0.125	0.960772		0.041	1.10587		0.219	0.952632
	0.992378	1.16514		1.02065	0.958999		0.958483	0.894235		1.00076	1.02509		0.057	1.08429		0.151	0.867736		0.086	0.861612		0.062	0.945963
	0.898083	0.862092		0.94065	0.901846		0.952372	0.910801		1.01599	1.09762		0.046	0.886507		0.053	0.885419		0.119	0.883206		0.086	0.997713
	1.1464	1.35022		0.943746	0.848529		1.01775	1.01207		1.06702	1.13786		0.352	1.08771		0.135	0.830341		0.156	0.918361		0.206	0.984833
	0.969066	0.973938		0.980414	0.95966		0.938317	0.835166		1.06332	1.0796		0.078	0.92816		0.035	0.903968		0.077	0.821993		0.16	0.937652
	0.973372	0.995697		0.973798	0.829009		0.952277	0.910468		1.00378	1.1024		0.134	0.944698		0.049	0.786204		0.075	0.882971		0.065	1.01425
	0.973886	0.805496		1.01071	1.22431		0.940739	0.826911		0.985837	0.980321		0.243	0.763837		0.131	1.11869		0.081	0.811773		0.057	0.91835
	1.00922	1.15227		1.0008	0.980575		0.954716	0.879883		1.00833	1.04133		0.318	1.05442		0.11	0.904854		0.05	0.851129		0.219	0.953743
	0.922382	0.954059		0.929308	0.853054		0.936159	0.904577		0.973199	0.946073		0.032	0.955234		0.057	0.847738		0.094	0.892362		0.084	0.897776
	0.969219	1.02872		1.03571	1.15183		0.915492	0.808198		1.10093	1.06896		0.055	0.980214		0.159	1.02706		0.022	0.815282		0.223	0.896696
	0.849528	0.800406		0.948528	0.83535		0.915139	0.846457		0.99922	0.988035		0.046	0.870117		0.037	0.813323		0.028	0.854206		0.115	0.913179
	0.985128	1.06522		0.958675	1.03591		0.9771	0.947622		1.00937	1.02558		0.099	0.998597		0.044	0.99792		0.089	0.895655		0.088	0.938354
	0.929437	0.996916		0.940315	0.864777		0.955779	0.892157		0.996264	0.99577		0.048	0.990567		0.023	0.849328		0.052	0.862043		0.041	0.923059
	0.924333	0.880144		1.0154	0.988327		0.982948	0.937805		0.988218	0.947035		0.05	0.879367		0.085	0.898889		0.109	0.881104		0.037	0.88503
	0.943296	0.992046		0.960257	0.889778		0.926073	1.06703		1.09498	1.20965		0.048	0.971245		0.039	0.855734		0.02	1.06408		0.189	1.02023
	0.954159	0.939611		1.06089	1.1143		0.970817	0.935196		1.07996	1.08342		0.159	0.909437		0.29	0.970007		0.101	0.889631		0.17	0.926477
	1.12823	1.33713		0.978748	1.15302		0.980343	1.16363		1.01624	0.969045		0.255	1.09452		0.068	1.08795		0.126	1.09618		0.095	0.88063
	0.8702	0.801865		0.975673	1.03205		1.35855	0.829087		0.984295	1.00452		0.025	0.850995		0.143	0.976876		0.457	0.563597		0.104	0.942495
	0.931777	0.901971		0.942213	0.855814		0.965927	0.971011		1.06246	1.10058		0.035	0.893975		0.06	0.838832		0.103	0.928378		0.183	0.956658
	0.962565	1.04003		0.96548	0.929045		0.926447	0.830797		1.064	1.13433		0.102	0.997837		0.142	0.888665		0.048	0.82817		0.143	0.984564
	0.953072	0.814799		0.989327	0.914752		0.93717	0.874204		1.04246	1.18087		0.026	0.789532		0.084	0.853903		0.033	0.861468		0.053	1.04613
	1.08413	1.13673		1.00053	0.96387		1.01268	1.04937		1.00737	1.00828		0.216	0.968329		0.125	0.889679		0.205	0.956975		0.057	0.924344
	1.00533	1.02739		0.944111	1.05758		0.938688	0.824915		1.09257	1.16305		0.133	0.943786		0.044	1.03451		0.025	0.811583		0.16	0.983092
	0.972103	1.02731		0.974333	0.815834		1.00096	1.05418		1.01995	1.0104		0.057	0.975961		0.025	0.773284		0.149	0.972621		0.038	0.914875
	0.945921	1.01467		1.01559	1.00518		0.900759	0.841887		1.00622	0.950036		0.027	0.990638		0.191	0.914045		0.032	0.863158		0.103	0.871947
	1.21088	1.42467		0.939317	0.837667		0.904833	0.808912		1.01158	1.03189		0.222	1.08657		0.09	0.823578		0.04	0.825615		0.09	0.942058
	0.947235	0.922111		0.955496	0.999091		0.991252	0.911964		1.08386	1.07489		0.069	0.899022		0.025	0.965654		0.118	0.849646		0.191	0.915873
	1.05754	0.842032		0.9425	0.903311		0.950292	1.06064		1.03395	1.02196		0.341	0.735319		0.038	0.885118		0.077	1.03076		0.129	0.912808
	0.986028	1.20526		0.966798	1.03377		0.957486	0.826366		1.00893	0.998824		0.103	1.12885		0.163	0.987496		0.081	0.797049		0.111	0.914263
	0.940963	0.939182		0.91429	0.92519		0.899539	0.840614		0.971988	0.967641		0.041	0.92177		0.037	0.934526		0.033	0.863021		0.093	0.919388
	0.932081	0.887119		0.954318	0.88029		0.937366	0.978056		1.06488	1.08301		0.058	0.878968		0.029	0.851879		0.038	0.963606		0.152	0.939242
	0.905605	0.807555		0.977553	0.902167		0.915733	0.852256		0.999613	0.960908		0.02	0.823528		0.055	0.852298		0.029	0.859501		0.093	0.887759
	0.923835	0.883971		0.997792	1.07964		1.02243	0.830182		0.943577	0.888886		0.098	0.883666		0.079	0.999274		0.153	0.749864		0.039	0.869989
	0.956	0.851488		0.97454	0.85132		0.951816	0.826197		1.04925	1.00799		0.033	0.822556		0.035	0.806748		0.041	0.801633		0.136	0.887201
	0.927864	1.02532		1.17945	0.83242		0.928219	0.85915		1.06801	1.10672		0.138	1.02051		0.264	0.651792		0.077	0.854798		0.179	0.956996
	0.927846	0.922276		0.940723	0.845481		0.959339	0.821298		0.990743	0.91674		0.062	0.917975		0.035	0.830017		0.061	0.790631		0.171	0.854535
	0.938856	0.940223		0.934159	0.880746		0.923391	0.894686		1.09848	1.07207		0.081	0.924862		0.02	0.870712		0.057	0.894808		0.158	0.901313
	0.919123	1.25503		0.93265	0.956881		0.93644	0.849167		0.990885	0.982046		0.145	1.26103		0.02	0.947512		0.047	0.837448		0.091	0.915279
	0.935162	1.13059		0.964962	0.919025		0.956892	0.953548		1.02167	1.03836		0.045	1.11651		0.049	0.879553		0.119	0.920289		0.026	0.938607
	0.944137	0.985256		1.03094	1.06464		0.943779	0.884132		1.07821	1.17622		0.156	0.963739		0.159	0.953711		0.065	0.86515		0.16	1.00747
	0.931851	0.877218		0.949652	1.00717		0.929765	0.855982		1.02194	1.00725		0.033	0.869372		0.083	0.979456		0.041	0.85023		0.104	0.91024
	0.911591	0.91908		0.933824	0.854388		1.01881	1.16962		1.04668	1.05624		0.096	0.931104		0.031	0.844958		0.138	1.06022		0.201	0.931953
	0.972967	1.31603		0.979968	0.860968		0.939393	0.826432		1.05068	1.03023		0.158	1.24914		0.105	0.811372		0.109	0.812465		0.039	0.905545
	0.924901	0.82718		0.954494	0.996618		0.975622	1.10288		1.06169	1.08093		0.023	0.825943		0.046	0.964274		0.026	1.04398		0.152	0.940251
	0.902623	0.817161		0.959077	0.836129		1.01105	1.04896		0.994079	1.03283		0.039	0.836077		0.023	0.805127		0.107	0.958145		0.054	0.959516
	0.965434	1.06896		0.951157	1.02279		0.960074	0.991866		1.02071	1.02084		0.191	1.02255		0.081	0.993071		0.093	0.954099		0.086	0.923633
	0.939161	1.02795		0.977835	0.94371		0.968652	1.11477		0.952239	0.994907		0.153	1.01083		0.196	0.891287		0.083	1.06283		0.046	0.964898
	1.01537	1.15837		0.96857	0.86227		0.991366	1.03814		1.06476	1.08144		0.254	1.05358		0.048	0.822161		0.086	0.967086		0.16	0.937983
	0.956531	0.870808		0.927192	0.878202		0.998821	0.998999		1.07064	1.19959		0.022	0.840752		0.02	0.87472		0.122	0.923682		0.165	1.03475
	0.914202	0.804506		0.982279	1.00647		0.962263	0.959709		0.983169	0.95457		0.091	0.812704		0.086	0.946264		0.153	0.921066		0.045	0.896653
	0.90965	0.808416		0.950621	1.0119		0.932237	0.968673		1.03182	1.08832		0.049	0.82074		0.049	0.983045		0.038	0.959613		0.124	0.974087
	0.955991	0.841941		0.957786	0.860664		0.97654	0.967651		0.975675	0.978427		0.106	0.813341		0.043	0.82987		0.104	0.915111		0.024	0.926122
	0.911191	1.3541		0.967927	0.943549		0.926405	0.861299		0.942344	0.874154		0.125	1.37242		0.091	0.900258		0.05	0.858613		0.021	0.85669
	0.954417	1.27318		1.08454	0.829802		0.934535	0.887997		1.17751	1.31048		0.08	1.23196		0.224	0.706598		0.026	0.877528		0.376	1.0278
	0.896738	0.809048		0.978607	0.896578		1.015	1.08931		1.04644	1.00057		0.038	0.833209		0.075	0.846106		0.145	0.99113		0.077	0.883034
	0.929251	0.849356		0.996616	0.855284		1.03831	1.17952		1.05619	1.03839		0.025	0.844115		0.079	0.792551		0.181	1.04912		0.175	0.907953
	1.17582	1.4765		0.935771	0.946415		1.01467	1.01492		1.04113	1.12288		0.241	1.15968		0.082	0.934021		0.212	0.923742		0.133	0.996038
	0.981764	1.08305		0.987491	1.06924		0.940044	0.894		1.05451	1.15052		0.135	1.01879		0.121	0.999973		0.081	0.878282		0.12	1.00759
	1.06454	1.25449		0.942099	0.869666		0.963015	0.963104		0.985557	1.00907		0.221	1.08831		0.025	0.852513		0.103	0.923603		0.086	0.945555
	1.11021	1.27352		1.00811	1.06653		0.934864	0.851757		1.02265	1.13665		0.37	1.05936		0.148	0.977035		0.08	0.841418		0.064	1.02647
	0.949386	0.90662		0.954424	0.869108		0.928922	0.83434		1.0253	1.15902		0.048	0.881916		0.085	0.840964		0.035	0.829486		0.106	1.04396
	0.970794	1.10446		0.964229	0.842112		0.905794	1.0239		0.976934	0.892678		0.206	1.05068		0.029	0.806556		0.059	1.04394		0.062	0.843868
	0.947305	0.83068		0.972134	0.996653		0.992365	1.11932		1.03492	1.01793		0.02	0.809821		0.084	0.94681		0.161	1.04166		0.056	0.90836
	1.13644	1.50605		0.949992	0.980472		0.940852	0.910563		1.05267	0.983927		0.276	1.22388		0.042	0.953147		0.049	0.893786		0.165	0.863206
	0.915172	0.82777		0.956897	0.837067		0.925903	0.835403		1.0546	1.08035		0.03	0.835319		0.069	0.807867		0.036	0.83325		0.183	0.946068
	0.897801	0.866904		0.958142	0.86332		0.991125	1.07155		1.14775	1.22547		0.055	0.891735		0.047	0.832122		0.225	0.998454		0.335	0.98606
	1.15283	1.50981		0.975894	1.04611		0.935448	0.8537		1.122	1.18075		0.369	1.20949		0.087	0.989964		0.02	0.842811		0.349	0.971868
	0.967785	0.918348		0.905343	0.928986		0.925354	0.919857		0.984871	1.04357		0.18	0.876341		0.02	0.947635		0.053	0.918031		0.062	0.978556
	0.972413	1.0435		0.932597	0.869721		0.946244	0.997925		1.04219	0.999662		0.201	0.99103		0.061	0.861253		0.089	0.973957		0.049	0.885831
	0.965167	1.00904		0.931213	0.870155		1.02057	0.95147		1.09174	1.21643		0.158	0.965494		0.072	0.862965		0.148	0.860988		0.206	1.02899
	1.02545	1.30914		0.955465	0.878587		0.922722	0.855753		1.21245	1.37226		0.093	1.179		0.038	0.84921		0.045	0.85649		0.247	1.04524
	0.887405	0.885415		0.932281	0.892251		0.96776	1.07662		1.09623	1.14817		0.039	0.921447		0.044	0.883864		0.061	1.0274		0.141	0.967278
	1.17937	1.61722		0.915265	0.933249		0.927721	0.824614		1.0427	0.987136		0.401	1.26639		0.028	0.941664		0.021	0.820877		0.17	0.874307
	0.981793	1.04013		1.01299	1.06696		0.970848	0.839924		0.98187	0.927415		0.098	0.978394		0.134	0.972724		0.053	0.798976		0.128	0.872299
	0.912905	0.832678		0.994422	0.884413		0.978658	0.965073		1.05389	1.10746		0.062	0.842357		0.083	0.821353		0.097	0.910697		0.181	0.970459
	0.988676	1.1137		0.991469	1.0151		0.945985	0.922511		1.06188	1.08615		0.154	1.0403		0.11	0.945528		0.145	0.900601		0.115	0.944622
	0.910841	0.860404		0.93993	0.947672		0.953434	0.894706		1.11836	1.20499		0.039	0.872378		0.077	0.931125		0.059	0.866631		0.375	0.995055
	1.04732	0.813292		0.987892	0.969575		0.953062	1.06699		1.0463	1.17256		0.241	0.717151		0.15	0.906394		0.094	1.03391		0.172	1.03497
	0.994742	1.00423		0.973587	1.04177		0.96015	0.973698		1.07554	1.12435		0.171	0.932327		0.094	0.988199		0.081	0.936548		0.146	0.965428
	0.981944	1.03463		0.93116	0.935757		0.990717	1.02652		1.10346	1.11441		0.035	0.973071		0.088	0.928076		0.057	0.956895		0.223	0.932682
	0.973603	1.0372		0.96013	1.16348		0.908844	0.844441		1.11457	1.07507		0.152	0.983837		0.092	1.11911		0.058	0.858074		0.176	0.890791
	0.930527	0.869673		0.966488	0.96988		1.02818	1.15061		1.02304	1.09589		0.053	0.863121		0.045	0.926757		0.174	1.03348		0.123	0.989284
	0.938401	0.842834		0.997693	0.973591		0.970771	1.04686		1.06199	1.03653		0.022	0.829465		0.101	0.901207		0.073	0.995899		0.103	0.901375
	0.931106	1.0504		0.952378	0.896074		0.959819	1.06207		1.04096	1.13021		0.04	1.04184		0.079	0.86892		0.086	1.0219		0.117	1.00269
	0.949651	0.859301		0.969288	1.02321		0.932852	0.91093		1.01884	0.951155		0.026	0.835654		0.064	0.974892		0.038	0.901814		0.099	0.862165
	0.925095	0.950726		0.979453	1.10533		0.951725	0.925831		0.994674	0.983939		0.079	0.949105		0.047	1.0422		0.021	0.89839		0.059	0.91355
	0.896982	0.879844		0.986306	0.922722		0.931788	0.988253		0.971823	0.870052		0.058	0.905872		0.053	0.863981		0.079	0.979481		0.06	0.826805
	0.971601	1.03578		0.95317	0.921473		0.94082	0.864764		1.09798	1.08515		0.133	0.984523		0.108	0.892806		0.021	0.84886		0.16	0.912728
	0.929515	0.848498		0.940913	0.8887		0.982852	1.08045		1.05268	1.08826		0.051	0.843023		0.096	0.872269		0.116	1.01523		0.084	0.954729
	0.938233	0.823046		0.951625	0.841342		1.0117	0.896616		0.985008	1.00042		0.068	0.810137		0.037	0.816492		0.184	0.818466		0.084	0.937972
	0.993717	1.24968		1.78456	0.86888		0.944619	1.06644		1.00128	1.02007		0.2	1.1614		0.202	0.449648		0.113	1.04262		0.091	0.940853
	0.927073	0.976942		1.04473	1.01907		0.947718	0.829849		1.06342	1.23956		0.029	0.973195		0.051	0.900837		0.036	0.808658		0.181	1.07648
	0.96116	0.836532		0.965568	1.02714		0.921328	0.814032		1.0153	1.0501		0.097	0.80377		0.029	0.982408		0.027	0.815967		0.136	0.955169
	0.991273	0.99266		0.959425	0.838957		0.931956	0.962584		1.10496	1.15006		0.138	0.924809		0.066	0.807557		0.043	0.953868		0.111	0.961212
	1.00217	1.13817		1.02734	0.995503		0.922844	0.80558		1.06296	1.10884		0.193	1.04885		0.04	0.894899		0.028	0.806167		0.166	0.963375
	0.945891	0.804007		1.06684	0.868128		0.998948	0.975686		0.993064	1.00347		0.109	0.784989		0.365	0.751502		0.197	0.902012		0.045	0.93319
	0.910563	0.880428		1.00456	1.05733		0.971075	0.894782		0.989349	1.04968		0.031	0.892952		0.118	0.972032		0.058	0.85096		0.078	0.979831
	0.961669	1.13309		0.969463	0.902308		1.01286	0.93272		1.09651	1.21199		0.071	1.08814		0.112	0.859545		0.204	0.850446		0.301	1.02078
	0.926324	1.03992		1.01071	0.981024		0.952556	1.04141		1.0334	1.08063		0.131	1.03677		0.082	0.896395		0.061	1.00967		0.157	0.96572
	0.91111	0.822773		0.94639	0.931882		0.938418	0.831466		1.06038	1.16038		0.039	0.833977		0.031	0.90936		0.065	0.818264		0.096	1.01061
	0.946163	0.86033		0.935298	0.86205		1.06745	1.06844		1.05031	1.05063		0.072	0.839739		0.021	0.851191		0.18	0.924374		0.173	0.923795
	0.955741	1.1101		1.02658	1.15624		0.90986	0.858758		0.984164	0.903441		0.112	1.07267		0.145	1.04017		0.042	0.871649		0.047	0.847768
	0.899769	0.836839		0.955813	1.03015		1.00744	1.05965		1.00287	1.10645		0.049	0.858926		0.125	0.995343		0.121	0.971383		0.042	1.0189
	0.935534	0.817715		0.952668	0.940392		0.942762	0.84987		1.1087	1.07986		0.039	0.807211		0.068	0.911617		0.099	0.832521		0.158	0.899492
	0.944544	0.860561		0.996408	0.82999		0.940692	0.862942		1.09901	1.04663		0.083	0.841405		0.109	0.769273		0.047	0.847187		0.102	0.879505
	0.96288	0.882702		1.02271	1.03478		0.916891	0.820539		1.08341	1.10746		0.099	0.846617		0.117	0.934417		0.04	0.826469		0.318	0.944014
	0.946014	0.859003		0.943493	0.869565		0.967868	0.968794		1.00796	1.09459		0.057	0.838576		0.041	0.851155		0.193	0.924401		0.105	1.00289
	0.915054	0.833587		0.94951	0.857404		0.944957	0.938456		1.08895	1.18382		0.031	0.841297		0.02	0.833933		0.033	0.917164		0.125	1.00398
	0.92184	0.845792		1.09865	1.25129		0.98883	1.04681		0.971971	1.08252		0.056	0.847331		0.179	1.05183		0.102	0.97767		0.033	1.02855
	0.905957	1.02138		0.973229	1.03317		0.993392	0.999033		1.12229	1.04957		0.069	1.04118		0.155	0.980396		0.174	0.928762		0.202	0.863674
	0.963219	0.989635		0.955457	0.901632		0.956715	0.885849		0.987229	0.974972		0.111	0.948844		0.045	0.871492		0.079	0.85511		0.05	0.912051
	0.936131	0.816586		0.948164	0.853359		0.923771	0.815173		1.08469	1.12677		0.038	0.805583		0.029	0.831176		0.07	0.814949		0.115	0.95934
	0.930432	0.885017		0.957983	0.857763		0.98106	1.08199		1.00612	0.993397		0.022	0.87844		0.037	0.826903		0.026	1.01852		0.136	0.911837
	0.94471	0.9035		1.2026	0.857525		0.932997	1.02897		1.0447	1.14105		0.04	0.883232		0.404	0.658525		0.059	1.01852		0.102	1.00869
	0.90606	0.969145		1.17769	1.52377		0.953214	0.858877		1.09408	1.19996		0.034	0.987817		0.473	1.1949		0.121	0.832119		0.299	1.0129
	0.914057	0.832916		0.891423	0.801523		0.930438	0.843194		1.03289	1.07479		0.034	0.841536		0.025	0.83038		0.046	0.836922		0.105	0.960977
	1.02265	1.1117		0.987078	0.943564		0.931099	0.815662		0.977171	0.900781		0.144	1.00393		0.033	0.882804		0.098	0.80902		0.057	0.851322
	0.968486	1.06054		0.934366	0.895656		0.984105	1.00316		1.09499	1.05377		0.089	1.0113		0.033	0.885257		0.138	0.941397		0.109	0.888756
	0.952787	0.937154		1.42676	0.927715		0.921773	0.880977		1.06522	1.10403		0.125	0.908364		0.739	0.600493		0.031	0.882644		0.382	0.957165
	0.917758	0.829733		1.00531	1.11316		0.954765	0.841765		1.02706	1.03948		0.094	0.834939		0.162	1.02259		0.062	0.814215		0.114	0.934687
	0.921131	0.856316		1.01249	1.08387		0.911331	1.05293		0.984629	0.943456		0.089	0.858534		0.207	0.988628		0.021	1.06701		0.052	0.8849
	0.929788	0.824022		0.925322	0.8304		0.975099	0.90946		1.09366	1.14685		0.052	0.818464		0.031	0.82878		0.081	0.861351		0.275	0.968435
	1.01615	1.06427		0.934626	0.823753		0.948315	0.827256		0.984874	1.04951		0.126	0.967247		0.077	0.813963		0.031	0.805624		0.051	0.984127
	1.01667	1.11417		0.898503	0.802804		0.952258	0.869663		1.02627	1.09277		0.284	1.01209		0.041	0.825154		0.059	0.843415		0.12	0.983357
	1.13177	1.22478		1.03975	1.08724		0.928829	0.819865		1.08176	1.14567		0.239	0.999412		0.18	0.965693		0.044	0.815176		0.172	0.978078
	0.959962	1.0279		0.974571	0.84092		1.00196	1.08774		1.03911	1.055		0.059	0.988873		0.072	0.796867		0.176	1.00258		0.136	0.937639
	1.02875	1.33905		0.936772	0.96736		1.02384	0.930636		0.992877	1.01279		0.216	1.20208		0.089	0.953671		0.193	0.839443		0.136	0.942043
	0.995313	1.46603		0.935608	0.826263		0.909085	0.812086		1.1858	1.28644		0.103	1.36028		0.039	0.815585		0.058	0.824978		0.188	1.0019
	0.913084	0.831806		1.13122	0.869139		0.953097	0.956889		1.02402	1.21336		0.02	0.841311		0.141	0.70956		0.125	0.927192		0.102	1.09427
	0.935833	0.854277		0.96068	0.946767		0.959715	1.00246		1.22064	1.26751		0.031	0.843035		0.115	0.910142		0.119	0.964645		0.278	0.958975
	1.02527	1.45004		1.03409	1.08143		0.948484	0.941292		0.999831	1.16203		0.252	1.30613		0.178	0.965793		0.05	0.916514		0.102	1.07334
	0.926008	0.86062		1.44837	0.876375		0.935437	0.83029		1.01668	1.03387		0.034	0.858305		0.382	0.558798		0.021	0.81971		0.222	0.939137
	0.941641	1.1213		0.965263	0.905489		0.988007	0.973786		1.02094	0.930132		0.095	1.09972		0.083	0.866328		0.115	0.910225		0.117	0.841372
	0.956867	0.961516		1.00136	0.991446		0.978129	1.02623		1.00873	1.03218		0.147	0.928004		0.08	0.914372		0.093	0.968932		0.15	0.944991
	1.02283	1.03871		1.00122	0.827711		0.909532	0.962646		1.01423	1.09177		0.289	0.937855		0.135	0.76347		0.201	0.977447		0.106	0.994128
	0.906522	0.813025		0.968804	0.870634		0.968747	1.11511		1.06841	1.04934		0.022	0.828267		0.108	0.829937		0.107	1.06305		0.125	0.907035
	0.936718	0.998554		0.968069	0.961267		0.922065	0.876196		1.00151	0.886015		0.031	0.984481		0.066	0.917028		0.047	0.877576		0.063	0.817016
	0.928121	1.14291		1.06766	0.878136		0.972808	1.00257		1.08285	1.0671		0.083	1.13724		0.1	0.759582		0.135	0.951774		0.165	0.910078
	0.914734	0.868099		0.979639	0.922325		0.963408	1.01065		1.04186	1.06625		0.043	0.876434		0.157	0.869486		0.108	0.968799		0.12	0.945133
	0.907695	0.863387		1.20291	0.881599		0.945586	0.848654		1.02411	1.01992		0.032	0.878437		0.757	0.676833		0.049	0.828847		0.11	0.919738
	0.964402	1.02193		0.914514	0.82026		0.972682	1.06795		1.02195	1.09138		0.146	0.978605		0.024	0.828335		0.106	1.01397		0.119	0.986257
	1.06693	1.23275		1.09154	0.881239		0.938665	0.897312		1.04035	1.02542		0.337	1.06705		0.082	0.745591		0.043	0.882831		0.075	0.91026
	0.924742	0.859683		0.934355	0.855825		1.22419	0.83424		1.07581	1.10603		0.077	0.858544		0.04	0.845899		0.264	0.629343		0.184	0.949452
	0.978322	1.24099		0.957646	0.832747		0.953428	0.845264		1.03963	1.10226		0.091	1.17147		0.037	0.803069		0.057	0.818746		0.13	0.979147
	0.956947	0.882922		1.01309	0.985096		0.972072	1.15533		1.07754	1.09219		0.025	0.852077		0.067	0.897997		0.18	1.09762		0.19	0.936073
	0.971158	0.818805		0.94047	0.825448		1.01537	0.997955		1.04737	1.0848		0.101	0.778637		0.026	0.810569		0.257	0.907676		0.097	0.956526
	0.952477	0.937873		1.01907	0.877457		1.12823	0.822874		1.04298	1.0945		0.038	0.909357		0.096	0.795179		0.277	0.673568		0.132	0.969139
	0.943179	0.877978		1.00253	0.865753		0.928002	0.829909		1.0419	1.06897		0.023	0.859676		0.038	0.797518		0.022	0.825898		0.108	0.947511
	0.998472	1.0279		0.967242	0.848995		0.938657	0.831588		1.05032	1.13466		0.106	0.950736		0.026	0.810616		0.032	0.818175		0.141	0.997669
	0.914152	0.841669		0.991976	1.1068		0.960739	0.973074		0.972244	0.993249		0.085	0.850292		0.155	1.03042		0.152	0.935374		0.026	0.943469
	1.00819	1.38509		0.951141	0.870765		0.936968	0.889707		1.03066	1.00783		0.235	1.26877		0.037	0.845476		0.039	0.876934		0.087	0.903055
	0.903767	0.877726		0.984084	1.00253		0.96872	0.864986		1.11488	1.09048		0.02	0.896907		0.111	0.940829		0.028	0.824623		0.191	0.903303
	0.943512	0.860203		0.929861	0.829688		0.89881	0.818277		1.03276	1.04299		0.033	0.841974		0.114	0.824027		0.068	0.84077		0.129	0.932662
	0.958587	0.851959		1.18916	0.886322		0.987242	1.14585		0.976569	0.9552		0.044	0.82079		0.147	0.688332		0.054	1.07188		0.099	0.903309
	0.926437	0.841807		0.959428	0.833032		1.01344	1.00373		1.03626	1.10004		0.051	0.839153		0.022	0.801852		0.119	0.914669		0.096	0.980357
	0.93194	0.92638		0.990484	0.994288		0.958025	0.937745		1.01195	0.988649		0.046	0.918007		0.059	0.927064		0.1	0.903968		0.109	0.902248
	0.980624	0.994881		1.20545	0.904633		0.926389	0.828707		0.99323	0.889792		0.092	0.936943		0.427	0.693058		0.021	0.826138		0.026	0.82734
	0.961988	1.0093		0.909582	0.820087		0.940587	0.862886		1.00712	1.08202		0.079	0.968933		0.022	0.832651		0.02	0.847226		0.056	0.992194
	0.931583	0.852175		0.944158	0.866037		0.977804	1.05982		0.997388	1.01205		0.05	0.844796		0.039	0.847105		0.062	1.00098		0.063	0.937098
	1.04493	1.10412		0.956705	0.873224		0.932356	0.872723		1.05161	1.12501		0.311	0.975838		0.05	0.842933		0.055	0.86445		0.22	0.987975
	1.02492	1.06496		1.0516	1.07742		0.94931	0.933417		1.0069	1.14913		0.175	0.959595		0.095	0.946192		0.058	0.908056		0.031	1.05397
	0.932709	0.851874		0.917251	0.906933		1.00474	0.923396		0.985829	0.978286		0.035	0.843478		0.034	0.913129		0.034	0.848749		0.053	0.91645
	0.934201	0.832389		1.0131	0.938918		0.976501	0.998139		1.01309	1.03782		0.056	0.822869		0.05	0.855891		0.031	0.94398		0.115	0.946061
	0.930358	0.819878		0.949304	0.906595		1.06225	1.38964		1.06287	1.1141		0.075	0.813849		0.042	0.881968		0.114	1.20816		0.153	0.968033
	0.924252	0.80883		0.968415	0.854337		1.0964	1.38833		0.976304	0.914915		0.034	0.808187		0.052	0.814728		0.177	1.16941		0.087	0.865447
	0.949867	1.00065		0.959409	0.872884		1.01415	0.926241		1.03515	1.01926		0.086	0.972888		0.122	0.840229		0.065	0.843461		0.125	0.909342
	1.02464	0.978956		0.999798	0.982231		1.19123	0.864902		1.04026	1.04498		0.306	0.882339		0.18	0.90729		0.126	0.670526		0.193	0.927709
	0.948631	1.02776		0.9822	0.921768		0.978491	0.967605		1.03745	0.987051		0.09	1.00055		0.058	0.866695		0.1	0.913242		0.1	0.878651
	0.927328	0.866632		0.951671	0.820361		1.01726	1.06856		1.00028	0.943842		0.025	0.86307		0.035	0.796092		0.048	0.970085		0.102	0.871412
	0.947166	0.919144		0.945708	0.84379		1.04547	1.09938		1.04879	1.0909		0.031	0.896196		0.025	0.82399		0.071	0.97114		0.155	0.960597
	0.982916	0.949435		0.949937	1.0067		0.974827	0.906203		0.982036	0.916198		0.103	0.892059		0.076	0.978705		0.024	0.858505		0.021	0.861602
	0.94011	0.821833		0.947546	0.929006		1.01652	0.919569		0.966184	1.03218		0.102	0.807328		0.075	0.905447		0.159	0.835436		0.055	0.986602
	0.915634	0.884704		1.02184	1.03827		1.00616	0.840494		1.11316	1.31073		0.067	0.89232		0.179	0.938368		0.082	0.771457		0.167	1.08743
	0.927941	1.32121		1.01983	0.869996		1.01775	1.00428		0.992709	1.07322		0.079	1.31491		0.061	0.78783		0.125	0.911298		0.125	0.998415
	0.902611	0.814215		0.982977	1.05931		1.02026	0.961637		1.03736	1.0664		0.038	0.833074		0.061	0.995235		0.139	0.870452		0.2	0.949368
	0.913371	0.867222		1.00163	0.876028		0.982616	0.847137		1.03195	1.00895		0.027	0.876855		0.068	0.80771		0.082	0.796186		0.187	0.902937
	0.943108	0.839797		1.00335	1.01122		0.962125	0.853323		1.05199	1.10741		0.034	0.822352		0.047	0.930767		0.024	0.819081		0.206	0.972174
	0.943591	0.932032		1.13294	0.928894		0.950596	0.824623		1.00285	0.98149		0.03	0.912204		0.066	0.757187		0.066	0.801132		0.062	0.903847
	1.0584	1.26573		0.970988	0.954947		0.983531	0.823213		0.967543	0.896933		0.26	1.10443		0.031	0.90826		0.048	0.772981		0.04	0.85612
	0.980278	0.931638		1.14411	0.899678		0.971558	0.919189		1.04913	1.06015		0.124	0.877694		0.136	0.726214		0.091	0.873738		0.108	0.933215
	0.936239	0.840505		0.921435	0.843245		1.00627	0.958861		1.03785	1.06981		0.039	0.829084		0.026	0.84515		0.098	0.880011		0.203	0.951958
	1.03284	1.05976		0.957825	0.855715		0.975036	1.01332		0.957527	0.898311		0.171	0.947588		0.067	0.825065		0.055	0.959776		0.049	0.866404
	0.948027	1.25712		0.99027	0.972281		0.981247	0.956527		1.0887	1.10631		0.208	1.22462		0.09	0.906741		0.032	0.900251		0.191	0.938453
	0.938312	0.835768		0.956926	0.872887		0.961621	0.869835		1.10187	1.09674		0.088	0.822591		0.07	0.842412		0.101	0.835369		0.197	0.919212
	0.993301	0.877498		0.989652	0.923446		1.06324	1.167		1.04606	1.17446		0.075	0.815851		0.045	0.861735		0.216	1.01364		0.2	1.03687
	0.952914	0.84485		1.00104	0.974037		0.969431	0.848977		0.994926	1.05014		0.106	0.818787		0.107	0.898601		0.062	0.808768		0.088	0.974769
	0.955086	0.8787		0.984336	1.01317		1.0284	1.06316		0.974433	1.04492		0.042	0.849655		0.09	0.950567		0.169	0.954728		0.082	0.99032
	1.08503	1.40212		0.933388	0.861243		0.957094	0.940838		1.09602	1.0761		0.204	1.1934		0.07	0.852135		0.048	0.907831		0.23	0.906731
	0.914153	0.824355		0.926957	0.860865		1.1521	0.841601		1.03964	1.07923		0.036	0.832799		0.126	0.85767		0.24	0.674625		0.129	0.958687
	0.951248	1.10808		0.954236	0.975606		1.06695	1.10229		0.996458	1.0109		0.024	1.07578		0.044	0.9442		0.204	0.954114		0.052	0.9369
	0.942848	1.22781		0.989677	0.965864		0.988613	1.00107		1.01919	0.983364		0.1	1.20263		0.046	0.901296		0.1	0.935151		0.087	0.891051
	0.992925	1.09536		1.75158	0.964038		0.943969	0.878352		1.09608	1.18942		0.119	1.01879		0.654	0.508286		0.061	0.859322		0.213	1.00216
	0.965621	0.860206		0.99152	1.00781		1.00267	0.998569		1.013	1.0341		0.027	0.822699		0.07	0.938686		0.039	0.919739		0.153	0.942751
	0.963046	1.27358		1.01711	0.970394		0.981001	0.961799		1.00034	1.08157		0.117	1.22131		0.142	0.881099		0.107	0.90544		0.037	0.998506
	1.00524	1.19459		1.07818	0.966662		1.07032	1.1042		1.01193	0.994898		0.174	1.09747		0.114	0.828		0.28	0.952746		0.071	0.907971
	1.0459	1.0533		1.03275	0.830665		0.993349	0.897492		0.995296	0.996503		0.195	0.930047		0.075	0.742808		0.108	0.834399		0.053	0.924637
	1.0622	1.21069		0.967322	0.854302		0.958374	0.844044		1.07866	0.995308		0.282	1.05262		0.055	0.815614		0.027	0.813345		0.033	0.852155
	1.0095	1.19083		0.994688	0.917087		0.965675	0.820909		1.11411	1.15416		0.094	1.0894		0.072	0.851468		0.033	0.785071		0.26	0.956709
	0.950996	1.00073		0.928116	0.895199		1.01618	0.938007		1.06212	1.14444		0.099	0.971817		0.024	0.890763		0.063	0.852472		0.139	0.995097
	0.990335	1.21702		0.965814	0.983057		0.992297	0.858332		0.976604	0.953679		0.156	1.13491		0.087	0.940006		0.04	0.798838		0.101	0.901838
	0.947834	1.0258		0.934385	0.819462		0.993901	1.08118		1.00405	1.00581		0.125	0.999483		0.022	0.80993		0.044	1.00462		0.114	0.925141
	0.934042	0.82032		0.938522	0.88833		1.00599	1.00209		0.998367	1.02925		0.03	0.811077		0.069	0.874127		0.083	0.919938		0.172	0.952086
	0.959499	0.867788		0.988361	1.02589		0.980628	0.971041		1.04469	1.13611		0.045	0.835246		0.199	0.958586		0.151	0.914489		0.205	1.00434
	0.940084	0.829627		1.00162	1.05701		0.945837	0.943739		1.00439	0.98954		0.027	0.815007		0.083	0.974591		0.083	0.921468		0.102	0.909866
	0.967757	0.872528		0.967192	0.917927		1.01988	1.08297		0.979021	0.91285		0.17	0.832642		0.034	0.876476		0.133	0.980648		0.063	0.861097
	0.96675	1.00916		0.953724	0.848226		0.943291	0.842002		1.0059	1.01417		0.069	0.964026		0.03	0.82136		0.096	0.824351		0.18	0.931114
	1.04666	1.15875		0.96739	0.846831		0.983593	0.979823		1.01513	1.0329		0.137	1.02242		0.073	0.808425		0.061	0.919978		0.134	0.939681
	0.893592	0.849161		0.974214	0.927134		0.958199	0.83773		0.971935	0.936838		0.028	0.877599		0.078	0.878887		0.048	0.807408		0.04	0.890169
	0.956795	0.916191		0.960015	0.934716		0.990086	0.910418		1.03798	1.08607		0.061	0.884325		0.022	0.899181		0.065	0.849206		0.067	0.966311
	0.93287	0.841934		1.07502	1.09923		0.982784	0.84426		1.13782	1.20873		0.053	0.833493		0.126	0.944312		0.059	0.793347		0.153	0.98107
	0.915183	0.847908		0.988511	0.930732		0.981082	0.84185		0.949948	0.94374		0.031	0.855629		0.021	0.869536		0.05	0.792455		0.085	0.917481
	0.950909	0.836027		0.965696	0.909809		0.956634	0.863401		0.968456	0.998936		0.026	0.811945		0.04	0.870071		0.034	0.833511		0.098	0.952582
	0.941541	1.03867		1.06562	1.08049		0.961418	1.05458		1.04609	1.02683		0.052	1.01879		0.034	0.936408		0.049	1.013		0.106	0.906506
	0.916655	0.833496		0.963446	0.934077		1.01232	0.885134		1.00668	0.954074		0.044	0.839736		0.023	0.895365		0.078	0.80749		0.13	0.875258
	1.10466	1.21722		0.936898	0.814127		0.982599	0.889757		1.00513	0.979474		0.288	1.01762		0.036	0.8025		0.102	0.836258		0.142	0.899939
	0.911551	0.974258		0.956218	0.836447		0.974145	0.83389		1.00374	1.00108		0.106	0.987047		0.063	0.807842		0.055	0.790551		0.024	0.921067
	1.07997	1.33455		1.04177	0.963881		0.958102	0.835851		0.978102	0.949738		0.299	1.14122		0.178	0.854472		0.094	0.805679		0.032	0.896736
	0.926864	0.836364		0.999325	1.09734		0.970701	0.832014		0.973887	0.88656		0.02	0.833343		0.102	1.01409		0.022	0.791571		0.052	0.840707
	0.946135	0.854056		1.42339	0.913228		1.00904	0.813265		0.973517	1.06708		0.03	0.833639		0.435	0.592515		0.068	0.744333		0.062	1.01228
	0.995929	1.14536		1.00718	0.989149		0.965775	0.817287		1.00487	1.04639		0.144	1.06208		0.238	0.90698		0.06	0.781526		0.08	0.961669
	0.930593	0.880562		0.994064	0.828236		0.959954	0.847668		0.9557	0.905175		0.054	0.873866		0.047	0.769457		0.024	0.815494		0.021	0.874694
	0.936166	0.820731		1.03987	0.919922		1.00961	1.06572		1.05199	1.15501		0.029	0.809641		0.217	0.816989		0.082	0.974844		0.13	1.01395
	1.09459	0.852114		0.947554	0.856042		1.14915	0.848811		1.00925	0.93161		0.193	0.71894		0.039	0.834327		0.313	0.68215		0.077	0.852471
	1.0321	1.07628		1.25586	0.869188		1.00749	1.0211		1.04306	1.09285		0.028	0.963055		0.128	0.639173		0.103	0.935992		0.169	0.9676
	1.01568	1.091		0.95995	0.90724		1.01289	0.887375		0.981433	1.04397		0.126	0.992003		0.07	0.872808		0.036	0.809075		0.058	0.982367
	0.934962	0.826914		0.979199	1.05377		1.02855	1.07068		1.04273	1.11184		0.126	0.816792		0.133	0.993849		0.105	0.961343		0.137	0.98472
	0.946621	0.898686		0.976134	0.829686		0.989572	1.01039		1.04959	1.01652		0.092	0.876753		0.024	0.784964		0.117	0.942942		0.043	0.894418
	0.995753	1.0795		1.01279	0.866506		0.959972	0.879873		1.03882	1.04194		0.228	1.00119		0.033	0.790131		0.091	0.84646		0.135	0.926286
	0.962345	1.18507		0.996216	1.04019		0.930966	0.818449		1.00759	1.02686		0.076	1.13726		0.107	0.964279		0.034	0.8119		0.138	0.94118
	0.98483	0.979896		1.0913	1.15068		0.954561	0.851111		1.07849	1.20942		0.126	0.91889		0.226	0.973766		0.058	0.823431		0.144	1.03563
	0.964174	0.972866		0.969359	1.05943		1.01	1.05806		1.06161	1.09542		0.208	0.931843		0.107	1.00933		0.17	0.967456		0.033	0.952934
	0.95915	0.946883		0.968598	0.852646		0.999099	0.995375		1.08278	1.11352		0.116	0.911705		0.092	0.812962		0.109	0.920075		0.183	0.949732
	1.01727	1.11919		0.979143	1.00861		0.963125	0.85619		1.00516	0.955437		0.159	1.01605		0.033	0.951311		0.05	0.820979		0.14	0.877836
	0.899105	0.826493		1.46023	1.00372		1.00205	0.85642		0.990397	1.00052		0.061	0.848934		1.194	0.634802		0.107	0.789298		0.101	0.932959
	0.943673	0.924725		0.987068	0.833452		1.05506	1.1169		1.04533	1.06439		0.079	0.904974		0.047	0.779792		0.261	0.977645		0.209	0.94035
	0.959508	0.946036		0.99966	1.04707		1.00343	1.14125		0.967491	1.00116		0.053	0.91055		0.105	0.967318		0.216	1.05036		0.055	0.955659
	0.946388	0.909106		0.926197	0.823958		1.00999	0.902031		1.09614	1.03903		0.042	0.887136		0.087	0.821574		0.149	0.824802		0.16	0.875397
	0.940589	0.866108		1.00138	0.824193		1.00992	0.998635		0.991096	0.999482		0.021	0.850387		0.025	0.760106		0.133	0.913201		0.128	0.931331
	0.997282	0.870792		0.937675	0.855781		0.975933	0.930482		1.10096	1.09672		0.185	0.806383		0.024	0.842859		0.055	0.880507		0.23	0.91996
	0.917604	0.967476		1.0397	0.996027		0.961979	0.906137		1.00496	1.08113		0.077	0.973711		0.047	0.884726		0.041	0.869908		0.066	0.993512
	0.941274	0.925493		0.97956	1.09233		1.00194	0.855713		1.02653	1.05089		0.032	0.908033		0.034	1.02984		0.028	0.788734		0.132	0.945427
	1.02161	0.949985		0.969744	0.905765		0.976935	0.971697		1.02147	1.04718		0.109	0.858772		0.028	0.862588		0.102	0.918566		0.131	0.946763
	0.945302	0.882882		1.02342	0.877295		0.961141	0.853882		0.949043	0.891608		0.044	0.862535		0.104	0.791656		0.026	0.820457		0.02	0.867627
	0.984057	1.03574		0.988862	0.913652		0.982309	0.848476		0.992664	1.06693		0.12	0.972024		0.171	0.853277		0.04	0.797694		0.11	0.992613
	0.955241	0.89067		0.988814	1.01159		0.967524	0.839912		0.992587	0.992613		0.035	0.861091		0.186	0.944793		0.034	0.801709		0.149	0.923541
	0.977171	0.864575		1.31434	1.19174		0.989507	0.949217		1.01372	1.0051		0.083	0.817104		0.03	0.837374		0.086	0.885914		0.152	0.915662
	1.05686	1.01076		0.939789	0.953593		0.960625	0.879905		1.0264	1.03892		0.208	0.883227		0.047	0.937083		0.046	0.845915		0.165	0.934788
	0.94513	0.926117		0.905816	0.841026		0.994145	0.976357		1.01292	1.0397		0.053	0.904938		0.037	0.85746		0.123	0.906994		0.104	0.947929
	0.966391	0.849704		0.996493	0.854824		1.00505	0.879893		1.08956	1.17129		0.052	0.812007		0.066	0.792224		0.036	0.808513		0.185	0.992792
	0.953055	1.12576		1.04058	1.09578		0.967484	0.858155		1.0896	1.14934		0.03	1.09087		0.131	0.97251		0.058	0.819156		0.315	0.974149
	0.959865	0.989678		0.94349	0.852502		1.02612	0.973311		0.980286	0.97933		0.08	0.952202		0.063	0.834455		0.198	0.87599		0.043	0.922617
	1.08594	1.1706		1.59356	1.02178		0.977466	0.901623		1.13139	1.23106		0.206	0.995515		0.569	0.592154		0.061	0.85186		0.214	1.00487
	0.943316	0.825423		1.31906	0.88563		0.977941	0.84858		0.958349	1.01639		0.067	0.808099		0.102	0.620059		0.034	0.801355		0.089	0.979452
	0.937591	0.871955		1.24469	0.988073		0.980914	0.855043		1.02122	1.17556		0.026	0.858867		0.343	0.733117		0.056	0.805011		0.119	1.06309
	0.897421	1.05125		0.923049	0.845053		0.974148	0.97195		1.07017	1.10334		0.052	1.08181		0.043	0.845481		0.028	0.921434		0.182	0.952142
	0.997861	1.03663		0.979422	0.86025		0.974996	0.968864		0.984129	1.0923		0.097	0.959397		0.106	0.811147		0.05	0.917709		0.148	1.02502
	0.924828	0.806395		1.09204	0.888844		0.969256	0.863175		0.997956	1.04837		0.037	0.805252		0.343	0.751682		0.036	0.822442		0.105	0.970172
	0.920917	0.855301		0.907358	0.846793		0.923467	0.828697		1.00542	0.925866		0.02	0.857716		0.068	0.861873		0.035	0.828742		0.05	0.850442
	0.994068	0.98573		0.951462	0.845705		0.964855	0.847828		1.01509	1.00909		0.08	0.915771		0.056	0.820867		0.026	0.811504		0.136	0.91806
	1.03052	1.28925		0.947942	0.862473		0.976759	1.07466		0.99838	1.06805		0.193	1.15538		0.085	0.84025		0.059	1.01608		0.035	0.987961
	0.983657	0.885335		1.29223	0.898693		0.926663	0.824837		0.968127	0.903385		0.045	0.831207		0.717	0.642267		0.03	0.822037		0.083	0.861759
	0.956414	0.914577		1.003	0.867305		1.01728	0.932394		1.02197	1.01781		0.075	0.88312		0.088	0.798577		0.121	0.846457		0.122	0.91976
	0.986183	0.967559		0.987479	0.868176		0.949354	0.82275		1.16197	1.19971		0.064	0.906077		0.064	0.811941		0.089	0.800358		0.198	0.953516
	1.01116	0.859212		0.944258	0.874143		1.00651	1.08098		1.11084	1.15365		0.169	0.784736		0.048	0.854942		0.136	0.991844		0.234	0.95911
	0.958397	0.906817		0.95737	1.00148		0.983667	1.03944		0.974731	0.962775		0.023	0.873814		0.087	0.966066		0.026	0.975879		0.095	0.912189
	0.949853	0.978557		0.980208	1.0902		0.965715	0.853852		0.968715	0.953841		0.049	0.951424		0.057	1.02715		0.082	0.816542		0.034	0.909337
	0.936992	0.834182		0.959095	0.860714		0.968133	0.827068		1.07225	1.11852		0.034	0.822186		0.023	0.828785		0.082	0.788953		0.191	0.963372
	0.996737	0.818958		0.949761	0.889358		0.97818	0.845208		1.0502	1.06282		0.122	0.758797		0.033	0.864783		0.119	0.797977		0.133	0.934614
	0.963957	0.871122		0.997681	0.861895		1.00363	1.05614		1.0417	1.08528		0.026	0.834577		0.207	0.797825		0.094	0.971835		0.133	0.962153
	1.00189	1.00853		1.01014	1.16196		1.00699	1.00337		1.0651	1.14859		0.228	0.929638		0.145	1.06232		0.026	0.920202		0.159	0.995904
	0.947055	0.822235		0.981586	0.936476		0.976815	0.888036		1.01393	1.02909		0.079	0.8018		0.036	0.881075		0.097	0.839582		0.125	0.937325
	1.00361	1.17339		1.11872	0.970793		0.996646	1.00692		1.01551	1.01309		0.244	1.07974		0.059	0.801404		0.076	0.933034		0.159	0.921319
	0.982206	1.13514		0.913668	0.826303		0.959615	0.844566		1.13923	1.17086		0.133	1.06731		0.028	0.83521		0.031	0.812795		0.478	0.949159
	0.971651	0.886402		0.958373	0.815293		0.974238	0.845446		0.990502	0.900418		0.093	0.842491		0.102	0.785641		0.03	0.80143		0.051	0.839525
	0.905211	0.806651		0.918113	0.842827		0.973509	0.915131		0.991655	0.926942		0.063	0.822964		0.037	0.847788		0.137	0.868137		0.14	0.86325
	0.951335	0.992312		1.01422	1.06776		1.07462	0.910032		1.01678	1.03355		0.045	0.963296		0.193	0.972268		0.373	0.78207		0.064	0.938754
	0.979157	1.29374		1.04315	0.858359		1.01524	1.07342		1.05603	1.07563		0.114	1.22022		0.088	0.759918		0.118	0.976447		0.175	0.940656
	0.951907	1.25438		1.01127	0.878372		0.982065	0.843616		1.0097	0.976274		0.061	1.21697		0.026	0.802147		0.034	0.793322		0.036	0.892945
	0.979438	0.831223		0.91679	0.821374		1.25862	0.856753		1.02685	1.0028		0.122	0.783764		0.062	0.827401		0.41	0.628648		0.146	0.901886
	0.983548	0.86902		0.947823	0.867479		1.01265	0.874296		1.02956	1.15605		0.039	0.815978		0.028	0.845233		0.069	0.797345		0.08	1.03699
	0.932577	0.861163		0.988412	0.862718		0.941039	0.832992		1.02028	1.07392		0.061	0.852797		0.021	0.806075		0.056	0.817482		0.115	0.972062
	0.94373	0.852817		0.934952	0.822643		1.00672	0.931781		1.08983	1.11995		0.024	0.834551		0.077	0.812582		0.078	0.854774		0.326	0.949036
	0.907566	1.0129		0.97748	0.957119		0.981215	0.863977		1.0105	1.03415		0.034	1.0307		0.185	0.904281		0.033	0.813173		0.144	0.945127
	0.99395	0.843766		0.946697	1.03489		0.965385	0.840781		1.03834	1.02177		0.057	0.783975		0.078	1.00955		0.034	0.804317		0.126	0.908782
	1.03375	1.28358		1.01071	1.02657		0.997084	1.05171		1.02048	1.09869		0.089	1.14671		0.042	0.938012		0.02	0.974111		0.065	0.994297
	1.10148	1.41045		1.1743	0.882334		0.994568	0.95543		1.01754	1.17527		0.424	1.18257		0.142	0.693902		0.161	0.887175		0.108	1.06668
	1.01534	0.975987		1.12897	1.3053		0.956098	0.833609		0.98916	0.969798		0.261	0.887726		0.089	1.06776		0.037	0.805203		0.097	0.90544
	1.04159	1.17565		1.12598	1.10366		0.940512	0.839129		0.98801	0.91956		0.18	1.04238		0.148	0.905206		0.077	0.823967		0.038	0.859535
	0.930587	0.845019		0.966809	0.894588		0.987585	0.842438		0.99987	0.950893		0.057	0.838599		0.116	0.85453		0.05	0.787786		0.119	0.87828
	0.959966	0.948496		1.14045	0.838924		0.970748	0.875788		0.980882	0.965911		0.074	0.912483		0.432	0.679344		0.062	0.833177		0.102	0.909422
	0.992049	0.862595		0.956951	0.896174		0.908552	0.904138		1.01273	1.07816		0.034	0.803006		0.041	0.864863		0.059	0.91903		0.115	0.983183
	1.02081	0.932746		0.968657	0.914342		0.968526	0.985864		1.01441	0.918774		0.034	0.843844		0.041	0.871733		0.047	0.940049		0.098	0.836448
	0.945826	0.82033		0.996158	0.94801		0.974836	0.840995		1.05453	1.06234		0.02	0.800981		0.175	0.878881		0.024	0.796722		0.2	0.930358
	0.934594	0.81736		0.95992	0.819197		0.944351	0.827058		1.04895	1.08069		0.026	0.807673		0.074	0.788131		0.03	0.808811		0.112	0.951463
	1.08765	1.13567		0.921954	1.03086		0.99549	0.832249		0.999626	0.914229		0.319	0.964292		0.057	1.0326		0.057	0.772078		0.044	0.844622
	0.979555	0.913856		0.931208	0.853592		0.979744	0.936584		1.00905	1.00978		0.164	0.861577		0.053	0.846543		0.102	0.882834		0.063	0.924187
	1.0533	1.39688		0.96747	0.829219		0.960866	0.821157		1.101	1.12926		0.382	1.22476		0.074	0.791547		0.066	0.789239		0.245	0.947222
	1.07542	1.3477		0.995571	0.842754		1.00333	0.84081		1.0622	1.08125		0.241	1.15734		0.097	0.78176		0.121	0.773923		0.164	0.940084
	0.968375	0.902244		0.923519	0.831767		0.980717	0.854217		0.989543	0.949021		0.097	0.86045		0.125	0.831765		0.021	0.804395		0.05	0.885699
	0.962833	0.962878		0.971695	0.848289		0.997867	1.02783		1.0746	1.12244		0.127	0.923561		0.063	0.80623		0.129	0.951251		0.061	0.964633
	0.99382	1.26109		1.96622	0.969348		0.95357	0.979757		1.09345	1.1957		0.16	1.17188		0.897	0.455294		0.089	0.948879		0.161	1.00987
	0.976075	0.940142		1.15365	0.847931		1.09282	1.19842		0.987932	0.974411		0.119	0.889519		0.307	0.678784		0.235	1.01276		0.041	0.910878
	0.951902	0.836711		1.00735	0.976297		0.976637	0.844658		0.976005	0.855419		0.045	0.811761		0.136	0.89505		0.057	0.798717		0.039	0.809417
	0.95451	0.814535		0.920936	0.920418		0.987916	0.828957		1.09645	1.15992		0.021	0.788087		0.044	0.922998		0.04	0.77492		0.106	0.97697
	0.916703	0.821663		1.00518	0.894663		1.04146	1.1194		1.01662	0.99221		0.029	0.82777		0.069	0.821978		0.098	0.992628		0.132	0.901339
	0.940004	0.861379		0.930851	1.06158		1.09403	1.13514		0.95336	1.01185		0.047	0.846271		0.058	1.05322		0.255	0.95822		0.057	0.98018
	0.968341	0.909654		0.984293	0.901336		0.984535	1.01885		1.04551	1.10067		0.04	0.867546		0.021	0.845683		0.076	0.955706		0.17	0.972243
	0.986081	1.21374		1.06603	0.91502		1.09082	1.07439		0.955832	0.882525		0.111	1.13673		0.179	0.792696		0.206	0.909612		0.027	0.852689
	0.973783	1.178		0.922821	0.908817		1.0458	1.05923		0.996096	0.997036		0.127	1.11719		0.047	0.909503		0.106	0.935375		0.094	0.924389
	1.01232	1.07969		0.935694	0.869372		0.956393	0.850471		0.981511	0.996698		0.161	0.984974		0.027	0.858058		0.04	0.821236		0.048	0.937807
	0.944106	0.836004		0.891293	0.82287		0.985047	0.918453		0.968494	0.979447		0.048	0.817772		0.056	0.85262		0.053	0.861083		0.051	0.933961
	1.01544	1.22512		0.979488	0.855201		0.942324	0.875192		0.964074	0.988705		0.194	1.11421		0.09	0.806332		0.034	0.857725		0.059	0.947112
	1.03038	0.920249		0.99573	0.86314		0.996751	0.926192		1.04161	1.06513		0.135	0.824809		0.098	0.800543		0.089	0.858143		0.153	0.944372
	0.970422	1.14051		1.06166	0.932103		0.989368	0.893087		1.05431	1.0327		0.159	1.08538		0.142	0.810818		0.074	0.833644		0.169	0.904588
	0.939024	0.826523		0.944145	0.968464		0.97865	0.850673		1.10625	1.22361		0.027	0.812875		0.048	0.947305		0.024	0.80275		0.353	1.0215
	0.969186	0.914877		0.908582	0.821666		0.980397	0.847764		1.07767	1.07387		0.048	0.871767		0.022	0.835171		0.058	0.79858		0.111	0.920261
	0.949547	0.99038		1.16976	1.08814		0.985436	1.11944		1.0455	1.08687		0.077	0.963231		0.09	0.859078		0.054	1.0491		0.19	0.960063
	1.03842	1.3985		0.936834	0.994585		0.968038	0.944325		1.01326	1.10754		0.375	1.24376		0.116	0.980447		0.041	0.900895		0.17	1.00945
	0.991767	1.01826		0.946872	0.825116		0.961501	0.822951		1.00942	1.0567		0.125	0.948187		0.026	0.804765		0.114	0.790441		0.094	0.966772
	0.940736	1.01868		0.940698	0.923936		1.02051	1.02705		0.993279	1.05591		0.036	1.00004		0.026	0.907062		0.102	0.929438		0.051	0.981746
	0.993224	1.08146		1.04826	0.863203		0.971289	0.877304		1.09688	1.11526		0.155	1.00556		0.193	0.760482		0.088	0.834155		0.224	0.938993
	0.996789	1.01628		0.972085	1.04396		0.955918	0.852166		1.1692	1.30797		0.173	0.941579		0.117	0.991804		0.028	0.823282		0.289	1.03312
	0.98775	1.06986		0.978758	0.87768		1.26268	0.837094		1.00293	1.11133		0.087	1.00029		0.072	0.828144		0.329	0.612247		0.069	1.02333
	0.968216	0.823965		0.97482	0.852234		0.973989	0.916871		1.01333	0.975662		0.074	0.785926		0.055	0.807382		0.054	0.869359		0.079	0.889185
	0.960229	0.91713		1.05114	0.995746		0.991425	0.852079		0.974761	0.918696		0.079	0.882066		0.191	0.874845		0.057	0.793716		0.072	0.8704
	1.03742	1.28016		1.02106	1.06045		0.995579	0.903002		0.987916	0.985783		0.211	1.1396		0.223	0.959138		0.04	0.837642		0.127	0.921524
	0.979349	1.11694		0.966359	0.89078		0.985947	0.822237		1.04043	1.08467		0.096	1.05326		0.11	0.851289		0.025	0.770174		0.188	0.962784
	0.918671	0.836513		0.988957	0.894143		0.987244	0.89876		0.990711	0.90239		0.046	0.840925		0.182	0.834977		0.074	0.840745		0.037	0.841186
	0.988115	1.03577		0.97615	1.00499		0.990414	0.828662		0.973247	0.856662		0.17	0.968053		0.175	0.950805		0.041	0.77269		0.031	0.812889
	0.991157	0.974689		0.992039	0.869312		1.01693	0.969708		0.996128	1.02723		0.167	0.908173		0.174	0.809267		0.118	0.880629		0.106	0.95235
	1.01575	1.08756		0.965293	0.900228		0.972747	0.853231		0.989355	0.92362		0.059	0.988805		0.021	0.861269		0.021	0.81005		0.159	0.862157
	1.00619	1.377		0.991714	1.01004		0.999762	0.910888		1.05287	1.08886		0.154	1.26386		0.102	0.94058		0.057	0.841421		0.046	0.955084
	1.01339	1.03324		0.946162	0.814401		0.982164	1.07021		0.975923	1.02496		0.167	0.941605		0.063	0.79491		0.082	1.00631		0.04	0.969925
	1.05064	1.53343		0.994983	0.868586		1.03204	1.02648		1.03114	1.06709		0.2	1.3479		0.045	0.806198		0.191	0.918542		0.124	0.95572
	0.958561	0.855643		1.03457	0.829097		0.963148	0.818868		0.980205	0.964124		0.033	0.824362		0.021	0.740102		0.027	0.785174		0.068	0.908366
	1.0329	1.05868		0.939176	0.94418		0.983529	0.847091		1.00387	1.04922		0.143	0.946567		0.105	0.928439		0.028	0.795404		0.102	0.965236
	0.999414	1.11045		1.00838	1.03769		0.979742	0.898929		0.984065	0.96437		0.109	1.02612		0.196	0.950359		0.117	0.847342		0.062	0.905034
	0.942977	0.848016		1.3081	0.871623		0.981477	0.899967		1.05229	0.971901		0.031	0.830516		0.203	0.615365		0.101	0.846821		0.149	0.852962
	0.947616	0.842979		1.00664	0.890604		0.982623	0.84673		1.11164	1.18579		0.038	0.821541		0.12	0.817065		0.048	0.795798		0.207	0.985122
	0.933665	0.979025		0.974551	0.912128		0.978368	0.943281		1.1514	1.21245		0.101	0.968385		0.079	0.864363		0.022	0.890397		0.151	0.972484
	0.917362	0.906474		0.931222	0.834272		1.02639	0.939831		1.02224	1.10549		0.069	0.912556		0.028	0.827369		0.24	0.845631		0.122	0.998731
	0.917815	1.18711		1.0411	0.885497		0.963756	0.908509		0.951466	0.881574		0.063	1.19449		0.044	0.78549		0.083	0.870577		0.029	0.855678
	0.987485	1.0083		1.0131	1.02392		0.981675	0.909825		0.997151	0.899277		0.101	0.942982		0.17	0.933384		0.058	0.855924		0.034	0.83287
	0.951594	0.875678		0.988819	0.845825		0.990273	0.846075		1.03774	1.01258		0.032	0.849841		0.04	0.789966		0.055	0.78904		0.105	0.901123
	0.938815	0.843778		0.92734	0.85595		1.0065	1.04013		1.01849	1.14567		0.035	0.830029		0.022	0.852421		0.057	0.954369		0.076	1.03883
	0.964731	1.12466		1.86106	0.947464		1.0353	0.947926		1.01505	1.07269		0.129	1.07661		0.83	0.470162		0.145	0.845573		0.167	0.975964
	0.956525	0.85033		0.947333	0.821333		0.984795	0.830922		1.06992	1.11551		0.072	0.820987		0.073	0.800685		0.068	0.779218		0.253	0.962872
	1.01627	1.0771		0.937346	0.875279		0.984454	0.899217		1.07876	1.14738		0.156	0.978795		0.057	0.862366		0.103	0.843556		0.351	0.982262
	0.952203	0.846911		1.05334	0.963515		1.0984	0.94977		0.973524	0.955542		0.057	0.821398		0.127	0.844766		0.207	0.798552		0.122	0.906459
	0.935943	0.879471		1.1983	0.877274		0.987904	0.856039		1.07167	1.09121		0.033	0.867795		0.222	0.676104		0.093	0.800247		0.204	0.940351
	0.990597	1.05549		0.968827	0.832248		0.999045	1.07634		0.984263	1.02781		0.218	0.98402		0.04	0.793326		0.117	0.994966		0.073	0.964377
	0.961482	1.08353		1.02518	1.0189		0.983508	0.94716		1.04493	1.09173		0.09	1.04074		0.131	0.917856		0.033	0.889386		0.236	0.964879
	0.979742	0.916198		1.0008	0.970603		1.01718	1.10145		1.0119	1.07419		0.123	0.86362		0.021	0.895653		0.14	1.00003		0.108	0.980363
	1.02101	1.1864		0.942779	0.853855		1.06479	1.07617		0.970366	0.945225		0.149	1.07312		0.05	0.836409		0.216	0.933391		0.046	0.89959
	0.997726	1.1515		1.00992	0.995478		0.970094	0.872575		0.981219	0.955903		0.146	1.06585		0.131	0.91031		0.038	0.83068		0.06	0.899691
	0.986732	0.940087		0.931568	0.811659		0.988883	0.969899		1.08282	1.1258		0.068	0.879861		0.021	0.804645		0.198	0.905788		0.176	0.96017
	0.962726	0.862718		0.936367	0.905535		1.01884	1.01992		1.04357	0.994671		0.027	0.827582		0.097	0.893109		0.132	0.924495		0.244	0.880248
	0.959	1.03928		0.975455	0.906357		0.97378	0.882111		1.01705	0.997586		0.127	1.00083		0.021	0.858098		0.047	0.836579		0.164	0.905844
	1.04892	1.07437		1.2872	0.90571		1.05602	1.04433		1.02147	1.03998		0.257	0.945926		0.057	0.649814		0.161	0.913293		0.123	0.940252
	0.973663	0.828067		1.04935	1.19539		0.985569	0.827453		0.962855	0.955653		0.027	0.78542		0.379	1.05204		0.034	0.775356		0.042	0.91661
	1.01382	1.08105		0.999859	0.973205		0.999261	0.930523		0.95765	0.861653		0.156	0.984753		0.088	0.898898		0.078	0.85999		0.062	0.830941
	0.953478	0.866724		0.962401	0.848104		1.03979	1.11343		1.05496	1.06917		0.068	0.83949		0.043	0.813837		0.148	0.988929		0.148	0.935961
	0.960051	0.878578		1.53395	0.873833		0.944612	0.841518		0.968199	1.01422		0.031	0.845145		0.381	0.526094		0.027	0.822726		0.079	0.967413
	0.945563	0.945571		0.920869	0.8355		1.01141	0.968839		1.0253	1.11025		0.075	0.923525		0.023	0.837902		0.157	0.884644		0.05	1.00004
	0.986028	1.00936		1.0343	1.06939		0.982119	0.969765		0.984494	0.9356		0.149	0.945372		0.069	0.954843		0.026	0.911901		0.071	0.877651
	0.966015	0.865602		1.03432	1.00412		0.961918	0.880587		1.01569	0.998988		0.042	0.827522		0.07	0.896553		0.021	0.845433		0.111	0.908331
	0.939316	0.90663		0.941603	0.844279		1.01571	1.02939		1.08335	1.17721		0.022	0.89138		0.047	0.828062		0.083	0.935953		0.19	1.00352
	0.973189	0.863816		0.982062	0.87055		0.950502	0.818875		1.02081	1.01537		0.09	0.819727		0.057	0.818653		0.057	0.795627		0.154	0.918599
	0.956909	0.98709		0.973796	0.852348		0.984164	0.874113		0.988661	0.935574		0.029	0.952645		0.195	0.80834		0.056	0.820248		0.034	0.873928
	1.06507	0.851867		0.984488	0.868207		0.977603	0.923752		1.08774	1.12913		0.219	0.738651		0.068	0.814437		0.029	0.872646		0.276	0.958659
	0.988399	1.08882		1.01394	0.905133		0.965486	0.948635		1.01714	1.07678		0.162	1.01734		0.126	0.824415		0.039	0.907399		0.084	0.977665
	0.958408	0.873689		0.970836	0.843059		0.992583	0.915268		0.991616	0.902952		0.127	0.841883		0.114	0.801968		0.102	0.851582		0.033	0.840942
	0.974239	0.944596		0.958613	1.09309		1.02626	0.887656		1.03224	1.02212		0.067	0.895417		0.079	1.05307		0.14	0.798789		0.262	0.914461
	0.940877	0.850256		0.937426	0.954594		0.995195	1.05537		1.01665	1.15983		0.028	0.834569		0.135	0.94043		0.078	0.979358		0.08	1.05358
	0.918749	0.864314		1.02666	1.03869		0.958547	0.905195		1.05551	1.078		0.024	0.8688		0.144	0.934342		0.064	0.872115		0.134	0.943197
	0.972375	0.843922		1.01267	1.02626		0.964151	0.839464		1.03316	1.03809		0.059	0.801519		0.047	0.935917		0.028	0.804085		0.184	0.927924
	1.05517	1.40998		0.884081	0.837127		0.995714	0.831985		1.00299	0.961234		0.193	1.23405		0.032	0.874469		0.045	0.77166		0.131	0.885068
	1.01653	1.03224		1.00563	0.858501		0.971998	0.82662		0.956513	0.899429		0.213	0.937792		0.034	0.788401		0.057	0.78539		0.03	0.868403
	0.97778	0.961101		1.02449	0.849614		0.951713	0.820689		1.07446	1.17453		0.184	0.907763		0.163	0.765875		0.034	0.796375		0.199	1.00952
	1.03812	1.06796		1.02783	1.06464		0.973492	0.826023		1.04429	1.10001		0.105	0.950057		0.126	0.956595		0.041	0.783618		0.342	0.972795
	0.995778	0.929565		0.928232	0.873357		1.01777	0.928597		0.980233	1.04002		0.125	0.86211		0.057	0.868921		0.197	0.842601		0.058	0.979846
	0.949866	0.834002		1.02373	0.860683		0.99583	1.00699		0.993702	0.978022		0.05	0.810867		0.177	0.776432		0.07	0.93387		0.041	0.908945
	0.957311	1.03289		0.963451	0.900015		0.988494	0.96575		0.992529	1.07753		0.058	0.99643		0.078	0.862711		0.074	0.902268		0.063	1.0026
	0.94878	0.968598		0.939217	1.03668		1.12351	0.840872		0.988499	0.964091		0.026	0.942808		0.031	1.01935		0.284	0.691191		0.047	0.900714
	1.01767	0.889528		0.926931	0.978451		0.980175	0.97662		0.95602	0.904902		0.112	0.807231		0.034	0.974847		0.083	0.920167		0.043	0.874137
	1.02086	1.27261		0.888156	0.8027		1.02957	0.960146		1.01764	1.01629		0.154	1.15127		0.023	0.834658		0.161	0.861245		0.151	0.922292
	0.957189	0.860176		0.956605	0.878193		0.941448	0.813352		1.10932	1.16535		0.065	0.829916		0.045	0.847817		0.025	0.797861		0.215	0.970162
	0.962987	0.950946		0.951943	0.985165		0.945493	0.872159		0.980009	0.927314		0.052	0.911969		0.071	0.955747		0.036	0.851888		0.075	0.87386
	0.998183	1.00023		0.970182	0.92045		0.965845	0.829424		0.987135	1.14121		0.066	0.925415		0.054	0.876176		0.022	0.793074		0.119	1.06766
	0.952467	0.834317		1.02553	0.979405		1.01601	1.00346		1.04088	1.08699		0.034	0.808958		0.142	0.881984		0.144	0.912114		0.126	0.964428
	0.961135	0.867155		1.01565	1.06039		0.982702	0.91041		1.01144	1.07554		0.031	0.833215		0.028	0.964201		0.057	0.855579		0.077	0.982046
	0.971171	0.881096		1.05543	0.843598		0.963115	0.876124		1.00123	1.01605		0.113	0.837862		0.104	0.738162		0.037	0.840103		0.113	0.937193
	0.956379	0.948717		0.907589	0.810146		0.977841	0.837781		0.984961	1.09927		0.115	0.916118		0.029	0.824364		0.022	0.791238		0.051	1.0307
	0.96135	0.86454		0.931944	0.87553		0.925053	0.819348		0.962319	0.893892		0.089	0.830517		0.055	0.867613		0.025	0.817988		0.032	0.857849
	0.944657	0.881679		1.00872	0.907956		0.942034	0.835802		1.07208	1.13109		0.064	0.861948		0.105	0.831264		0.029	0.819373		0.174	0.974342
	1.07009	1.08575		0.928886	0.858596		0.964134	0.916714		1.04705	1.06417		0.187	0.937029		0.082	0.853633		0.145	0.878095		0.208	0.938614
	0.943211	0.82601		1.00531	0.886412		0.992194	0.903192		1.05635	1.23797		0.091	0.808764		0.103	0.814294		0.035	0.840676		0.106	1.08229
	1.01733	1.13944		0.939843	0.853533		0.966092	0.83652		1.0443	1.05205		0.106	1.03437		0.026	0.838706		0.041	0.799655		0.125	0.930367
	1.01666	0.968801		1.08268	1.32312		0.959947	0.908515		0.973143	0.903175		0.156	0.880038		0.168	1.12862		0.038	0.874037		0.043	0.857117
	1.03089	1.05842		0.971073	0.891691		0.984798	0.890459		1.02144	1.06436		0.134	0.948179		0.056	0.848024		0.087	0.835048		0.241	0.962323
	0.97378	1.19356		0.963303	0.874084		0.97524	0.846689		1.07757	1.06057		0.061	1.13195		0.025	0.837984		0.066	0.801783		0.167	0.90895
	1.03833	1.14907		1.07146	0.910104		0.991083	1.05217		1.01176	1.04244		0.143	1.02201		0.23	0.784442		0.046	0.980436		0.048	0.951524
	0.932463	0.829954		1.06	0.932575		1.11125	1.06999		0.979608	1.06334		0.039	0.821991		0.241	0.812501		0.198	0.889228		0.058	1.00245
	0.992911	0.876922		1.01551	0.851051		0.943145	0.843842		1.01882	1.10156		0.078	0.815635		0.113	0.773955		0.06	0.826281		0.168	0.998516
	0.971048	0.838423		0.966896	0.84172		0.979066	0.99321		1.03187	1.01532		0.022	0.797384		0.102	0.803957		0.06	0.936859		0.108	0.908709
	1.03354	1.15729		1.04852	0.841519		0.997841	0.929911		0.988253	1.07676		0.203	1.03409		0.198	0.741197		0.094	0.860647		0.111	1.00623
	0.949698	0.883888		0.965481	0.837456		0.990748	0.843185		1.00917	0.977463		0.03	0.859521		0.079	0.801057		0.097	0.785968		0.121	0.894504
	1.00933	0.962208		0.917716	0.861691		0.972991	0.915873		1.02046	1.07885		0.148	0.880399		0.065	0.867139		0.021	0.869303		0.171	0.976354
	1.00245	1.08705		1.00146	0.967825		0.978461	0.869281		1.00842	1.05528		0.102	1.00146		0.241	0.892504		0.128	0.820468		0.155	0.966437
	1.00965	1.04678		1.14974	0.844597		1.04318	0.997418		1.08575	1.10308		0.111	0.957473		0.273	0.678411		0.14	0.883003		0.193	0.938262
	0.944518	0.849289		0.918951	0.819145		1.00182	0.85764		0.981326	0.951472		0.035	0.830405		0.118	0.823215		0.108	0.790607		0.034	0.895422
	1.1529	1.42098		1.05093	1.14193		0.94473	0.819188		0.980164	1.09342		0.281	1.13826		0.13	1.00349		0.025	0.800793		0.072	1.03023
	0.939258	0.878016		0.949391	0.86728		1.014	1.03683		1.01318	1.03196		0.097	0.863302		0.034	0.843644		0.222	0.944309		0.121	0.940632
	0.959518	0.847077		0.962605	0.904985		0.964927	0.822569		1.00029	0.964509		0.024	0.815295		0.038	0.868237		0.074	0.787269		0.057	0.890487
	0.937798	0.822774		0.989332	0.866552		1.04943	1.0664		1.06302	1.0593		0.026	0.810244		0.037	0.808904		0.142	0.938456		0.14	0.920285
	0.941155	0.859928		0.97658	0.898092		0.982264	0.970049		1.03925	1.13268		0.048	0.843812		0.021	0.849294		0.064	0.912033		0.169	1.00655
	0.974844	0.914843		0.938469	0.870612		1.01409	0.909144		1.00117	0.947173		0.068	0.866675		0.102	0.856742		0.102	0.827941		0.143	0.873709
	0.961403	0.920499		0.971347	0.979826		1.00693	0.957837		1.10646	1.25178		0.108	0.884225		0.135	0.931578		0.112	0.878491		0.217	1.04481
	1.03705	1.12089		0.97725	0.973865		0.975306	0.870077		1.13694	1.17954		0.258	0.998181		0.043	0.920318		0.051	0.823876		0.238	0.958123
	0.964408	1.01661		0.984422	0.837765		0.961679	0.84527		1.00879	1.02886		0.12	0.973509		0.051	0.785933		0.027	0.811728		0.078	0.941891
	0.933052	0.898471		1.01957	0.966314		0.962574	0.826257		1.06373	1.12003		0.025	0.889289		0.118	0.875282		0.154	0.792731		0.113	0.972393
	0.949595	0.82562		0.935978	0.943164		1.03816	1.00108		0.969052	0.9415		0.025	0.802946		0.071	0.930607		0.261	0.890531		0.072	0.89726
	0.935347	0.844409		0.925147	0.83873		0.967382	0.903562		1.15163	1.19075		0.024	0.833729		0.046	0.837252		0.105	0.862591		0.265	0.954887
	0.92775	0.917764		1.12493	1.25041		0.963379	0.832357		1.0085	1.0206		0.069	0.913576		0.238	1.02653		0.051	0.797916		0.086	0.93459
	1.07092	1.18981		0.965761	0.95572		0.972095	0.853574		0.987809	1.00455		0.169	1.02605		0.133	0.913914		0.047	0.810918		0.057	0.93917
	0.948883	0.864627		0.951841	0.836306		0.976612	0.868585		0.995384	1.02348		0.022	0.841514		0.041	0.81142		0.097	0.821363		0.081	0.949589
	0.940637	0.879937		1.5148	0.907448		0.946463	0.852091		1.00611	1.09319		0.101	0.863922		0.56	0.553238		0.037	0.831434		0.11	1.00344
	1.00264	0.964316		1.00977	0.899558		1.02868	0.987094		1.07981	1.08869		0.201	0.888218		0.038	0.822717		0.188	0.886187		0.205	0.931106
	0.921685	0.831209		0.99711	0.906369		0.983129	0.854665		1.02591	0.952145		0.043	0.832861		0.045	0.839474		0.048	0.802842		0.118	0.85711
	0.963615	0.881962		1.01243	0.837368		0.97025	0.823283		1.0776	1.16053		0.069	0.845262		0.198	0.763829		0.026	0.783629		0.233	0.994588
	1.02264	1.00627		0.972046	0.977308		0.9749	0.928242		0.978149	0.972426		0.175	0.908733		0.027	0.928517		0.042	0.879318		0.054	0.918114
	0.9847	1.08719		0.944156	0.889036		0.937185	0.821342		0.977034	1.01362		0.068	1.01964		0.041	0.869602		0.044	0.809364		0.02	0.958098
	0.948273	0.909041		1.34381	0.96728		0.97439	1.01464		1.03703	1.11599		0.024	0.88531		0.732	0.66475		0.03	0.961666		0.112	0.993833
	0.996241	1.084		0.915594	0.867768		1.06196	1.12518		1.01896	1.06536		0.102	1.00487		0.08	0.875278		0.342	0.978491		0.125	0.965573
	1.00007	0.999384		2.25427	1.38304		0.936802	0.828214		1.03738	1.07463		0.084	0.922879		0.495	0.566597		0.05	0.816469		0.148	0.956676
	1.02493	1.04406		0.961779	0.893499		1.0149	0.996337		1.03047	1.02943		0.17	0.94076		0.08	0.857954		0.093	0.906623		0.145	0.922581
	1.039	1.04321		1.61207	1.04921		0.963785	1.02574		1.03643	1.05199		0.214	0.927266		0.43	0.601069		0.047	0.982886		0.185	0.937382
	0.994191	0.975743		0.94937	0.835699		1.03929	1.15414		1.01834	1.02565		0.114	0.906381		0.055	0.812942		0.137	1.02558		0.151	0.930143
	1.00447	1.09361		0.964296	0.869327		0.946621	1.00576		0.996066	1.05228		0.116	1.00547		0.034	0.832564		0.079	0.981213		0.095	0.975634
	0.983768	1.08791		1.04543	0.909915		0.972005	0.993117		1.0982	1.16662		0.075	1.02128		0.252	0.803807		0.074	0.943575		0.186	0.981053
	0.953066	0.913951		1.31946	0.938182		0.959077	0.86958		1.04725	1.00809		0.023	0.885615		0.398	0.656655		0.056	0.837338		0.173	0.888982
	0.923219	0.885176		1.02208	0.850824		1.01877	0.948401		1.01033	1.00256		0.039	0.885462		0.063	0.768774		0.084	0.859725		0.063	0.916412
	0.965704	1.08468		0.925803	0.908463		0.98666	0.848474		1.03103	1.10684		0.09	1.0373		0.071	0.90622		0.058	0.794174		0.241	0.99142
	1.01214	1.00052		0.970107	0.940003		0.968926	0.844798		1.05526	1.06986		0.153	0.912917		0.197	0.894859		0.037	0.805206		0.169	0.936299
	0.972249	1.07793		1.07852	0.846422		0.963559	0.821338		1.02102	1.03513		0.079	1.0239		0.231	0.724779		0.041	0.787206		0.116	0.936278
	0.984029	0.923553		1.06156	1.04838		1.02636	1.02174		0.966169	0.995309		0.114	0.86676		0.176	0.912045		0.102	0.919365		0.044	0.951371
	1.14402	1.38202		0.988346	0.886235		0.983145	0.958118		1.03415	1.0936		0.249	1.11565		0.024	0.828104		0.05	0.900009		0.082	0.976604
	0.96648	1.04794		1.08423	0.881032		0.953351	0.841751		0.967718	0.894753		0.115	1.00136		0.167	0.750441		0.021	0.815409		0.067	0.853885
	0.961905	0.940895		1.2592	0.873119		1.05189	1.09625		1.07773	1.15127		0.093	0.903345		0.359	0.640359		0.22	0.962465		0.195	0.986539
	0.950893	1.21588		0.954765	0.977597		0.994249	0.826721		0.956088	0.975948		0.09	1.18087		0.08	0.945602		0.043	0.767907		0.106	0.9427
	0.970241	0.946072		0.952312	0.834168		0.955628	0.839007		0.980274	1.10438		0.107	0.900512		0.04	0.808945		0.052	0.810815		0.101	1.04044
	0.934037	0.853602		1.49375	0.968115		1.00945	1.00765		1.00582	0.997999		0.032	0.843988		0.474	0.59854		0.27	0.921865		0.093	0.916333
	1.01375	1.0475		0.994637	0.859263		1.05199	0.965737		0.9831	0.940104		0.184	0.954258		0.109	0.797823		0.103	0.847799		0.034	0.883128
	1.08872	1.14657		0.926655	0.955119		0.955806	0.964773		1.17658	1.20236		0.249	0.972592		0.092	0.951884		0.073	0.932182		0.152	0.943751
	0.991794	0.996207		0.963907	0.924129		0.981655	0.976556		1.11886	1.12189		0.057	0.927627		0.056	0.885405		0.071	0.91872		0.148	0.926019
	0.935147	0.831694		0.966168	0.8983		1.07059	1.06217		1.06022	1.10906		0.035	0.821351		0.023	0.858646		0.146	0.916257		0.139	0.966063
	1.0411	1.07195		0.923636	0.848757		0.983712	1.00452		0.988757	1.05822		0.21	0.950877		0.045	0.848648		0.054	0.943048		0.056	0.988401
	0.96589	0.898971		0.951625	1.06245		1.01402	0.964885		0.960917	0.863461		0.024	0.859534		0.138	1.03107		0.155	0.87877		0.037	0.829854
	0.963369	0.828331		0.913024	0.810718		0.974977	0.966923		1.07027	1.1717		0.022	0.794065		0.031	0.820035		0.055	0.915889		0.163	1.01104
	0.988567	0.986269		2.09917	1.32184		0.976597	0.853003		0.979789	0.994728		0.133	0.921371		0.605	0.581535		0.029	0.806641		0.043	0.937599
	0.943595	0.821339		2.17958	1.31994		1.02859	0.957442		1.0018	0.99659		0.04	0.803862		0.286	0.559274		0.118	0.859634		0.12	0.91871
	0.961192	0.825525		1.01767	1.07799		0.984956	0.854684		1.14658	1.16583		0.09	0.793168		0.139	0.97825		0.025	0.801372		0.169	0.939026
	0.956909	0.9187		0.945486	0.882438		1.00148	0.929749		1.1351	1.22632		0.086	0.886641		0.027	0.861935		0.044	0.857369		0.379	0.99773
	1.0949	1.37735		0.994687	0.878987		0.971153	0.936711		0.982721	0.950817		0.167	1.16176		0.022	0.816095		0.09	0.890765		0.036	0.893535
	1.06022	1.09292		0.990219	0.895067		1.07529	1.11683		1.01017	0.972824		0.251	0.951998		0.039	0.834775		0.199	0.959195		0.131	0.889378
	0.981989	1.04316		1.00529	0.947224		0.970232	0.829901		0.962507	0.870239		0.138	0.981044		0.108	0.870172		0.036	0.789943		0.034	0.834987
	0.984324	0.826962		2.14454	1.45565		0.962379	0.887894		0.970338	1.01251		0.071	0.775876		0.791	0.626855		0.038	0.852041		0.08	0.963651
	0.945195	1.0084		0.947537	0.853368		0.997593	1.02817		0.977676	0.93097		0.242	0.985269		0.093	0.831735		0.073	0.951825		0.041	0.879398
	1.03246	1.25031		1.03083	0.892967		0.959245	0.894478		1.00536	1.01108		0.135	1.11838		0.23	0.800003		0.107	0.861162		0.081	0.928771
	1.03015	1.08352		0.933753	0.854952		0.970425	0.818103		1.04984	1.06647		0.156	0.971362		0.034	0.84558		0.021	0.778558		0.183	0.93815
	0.958137	0.965975		2.11789	1.33254		0.963486	0.894811		1.00707	0.964178		0.15	0.931072		0.748	0.581059		0.023	0.857691		0.127	0.884185
	0.935248	0.822807		1.08136	0.871687		0.954029	0.844802		0.998201	1.01767		0.048	0.812487		0.254	0.744448		0.024	0.817783		0.091	0.941527
	0.962904	1.03796		0.963852	0.947617		0.964918	0.865546		1.05096	1.16631		0.115	0.995501		0.033	0.907962		0.027	0.828409		0.183	1.02488
	0.956506	0.907554		0.982634	0.966175		0.987026	0.972983		1.00628	1.03364		0.049	0.876253		0.305	0.908048		0.043	0.910377		0.194	0.948634
	0.977044	0.825054		0.942372	0.821867		0.981592	0.851232		0.962288	0.924018		0.037	0.779854		0.023	0.805423		0.098	0.80087		0.035	0.886789
	1.00617	1.03995		0.928573	0.928021		0.994384	0.844393		1.16769	1.26722		0.173	0.954526		0.032	0.922969		0.034	0.784216		0.216	1.00223
	1.09203	1.23481		1.88833	1.20793		0.973895	0.908068		1.02111	1.06811		0.352	1.04426		0.47	0.590755		0.087	0.861095		0.11	0.966027
	1.02244	1.07298		1.18243	0.931935		1.05242	1.06773		1.08335	1.21738		0.153	0.969167		0.306	0.727871		0.207	0.936952		0.111	1.03778
	0.973576	0.8179		1.0474	0.912021		1.0046	0.836367		1.06891	1.11293		0.095	0.775846		0.189	0.804153		0.028	0.768859		0.151	0.961555
	1.04531	1.03205		0.984668	0.855457		1.00378	0.848843		1.04626	1.08086		0.186	0.911804		0.048	0.802331		0.045	0.780966		0.143	0.954054
	0.944102	0.820031		0.955568	0.918345		0.968219	0.841034		1.01467	1.05692		0.029	0.802151		0.061	0.887542		0.036	0.802204		0.065	0.961972
	0.99167	1.13207		0.943853	0.865872		1.07782	0.849733		1.08164	1.12768		0.04	1.05427		0.1	0.847217		0.261	0.728082		0.163	0.962825
	0.97694	1.03611		0.91186	0.872475		0.977674	0.950613		1.03739	1.18213		0.074	0.979454		0.029	0.883628		0.126	0.897955		0.14	1.05237
	0.998442	1.03682		1.00533	0.996252		1.02016	1.05751		0.990147	1.07428		0.073	0.959017		0.029	0.915174		0.211	0.957332		0.072	1.00199
	0.941961	0.887332		0.980986	0.851686		0.986708	0.956645		1.05781	1.04557		0.111	0.869957		0.088	0.801792		0.159	0.89538		0.204	0.912826
	1.09888	1.20539		0.924625	0.863757		0.986091	0.992698		0.971086	0.915273		0.17	1.01303		0.029	0.862722		0.099	0.929705		0.022	0.870438
	0.946192	0.882498		0.984623	0.967308		0.997418	1.07062		1.05652	1.03743		0.032	0.86135		0.144	0.907277		0.136	0.991291		0.352	0.906824
	0.959002	0.861123		0.951311	0.903245		0.979812	0.962397		1.13249	1.20263		0.02	0.82926		0.027	0.876855		0.111	0.907103		0.213	0.98071
	1.0449	1.27634		0.970697	0.978643		0.976329	0.982679		1.07973	1.06297		0.289	1.12808		0.024	0.931078		0.108	0.929524		0.248	0.909176
	1.01526	1.12668		0.933896	0.863004		1.06617	0.839928		0.997308	0.919963		0.123	1.02487		0.096	0.853413		0.189	0.727545		0.062	0.851895
	1.02754	1.09421		0.971597	0.925793		0.986175	0.849914		1.0152	1.04124		0.216	0.983436		0.083	0.87998		0.077	0.795914		0.11	0.947204
	0.933705	0.827506		0.920415	0.844026		0.956888	0.915041		0.971715	1.0174		0.038	0.818478		0.03	0.84687		0.023	0.88313		0.121	0.966932
	1.01278	1.13363		0.948818	0.857799		0.913486	0.810687		1.01694	1.02107		0.129	1.03372		0.05	0.834925		0.052	0.819589		0.11	0.927265
	1.08153	1.04648		1.20022	0.941799		0.939897	0.919403		0.99029	0.928177		0.212	0.893595		0.086	0.724677		0.075	0.90338		0.056	0.865592
	1.01707	1.15176		0.947085	0.844828		1.00512	0.956603		1.2601	1.41578		0.23	1.04582		0.1	0.823804		0.121	0.878943		0.112	1.03762
	0.989563	1.09089		0.996351	0.908545		0.970268	0.82078		0.95586	0.867841		0.138	1.01808		0.034	0.84213		0.08	0.781232		0.034	0.838477
	0.97259	1.00056		1.01526	0.924078		0.976875	0.850417		0.96594	0.909646		0.158	0.950076		0.141	0.840573		0.039	0.803966		0.068	0.869696
	0.940629	0.876356		1.00735	0.979186		1.00035	0.997619		1.10096	1.17311		0.037	0.860413		0.123	0.897701		0.096	0.920998		0.24	0.98404
	0.995307	0.946025		1.03821	0.867877		0.948583	0.849113		1.02076	0.988221		0.076	0.87779		0.034	0.772		0.043	0.826676		0.117	0.89408
	0.965631	0.924548		0.948789	0.91332		0.976175	0.84266		1.14016	1.18663		0.095	0.884226		0.099	0.888993		0.034	0.797204		0.218	0.96115
	0.935512	0.857958		2.27654	1.53937		1.07012	1.04637		0.969867	0.880286		0.038	0.846957		0.402	0.624474		0.23	0.903022		0.025	0.838217
	1.01747	1.13824		0.966512	0.858998		0.968607	0.880555		1.0798	1.0655		0.065	1.03314		0.023	0.820786		0.034	0.839564		0.124	0.911292
	1.09663	1.0449		0.950761	0.817908		1.18868	1.45918		1.07566	1.16741		0.241	0.87995		0.202	0.794472		0.353	1.13368		0.146	1.00229
	0.964814	0.890478		0.95663	0.928674		0.982201	0.966792		1.06046	1.09159		0.034	0.852363		0.073	0.896529		0.115	0.909029		0.105	0.950629
	0.936692	0.883282		0.952787	0.974657		1.04503	1.07286		1.18079	1.26854		0.13	0.870859		0.137	0.944715		0.177	0.948105		0.294	0.992151
	1.16343	1.58003		1.44066	1.04256		0.966834	0.935243		1.00491	1.03351		0.519	1.25421		0.395	0.668316		0.062	0.893342		0.105	0.9498
	1.07766	1.21301		1.0278	0.960323		1.02672	0.976204		0.974501	1.03833		0.208	1.0395		0.037	0.862885		0.102	0.878081		0.093	0.984009
	0.932014	0.817012		1.03506	1.07829		0.951978	0.830979		1.00213	0.967434		0.033	0.809564		0.19	0.962088		0.04	0.806135		0.07	0.891542
	1.07289	1.47644		1.06322	0.962107		0.97271	1.00733		1.01398	1.05751		0.34	1.27088		0.029	0.835692		0.067	0.956388		0.028	0.96316
	0.972655	0.944976		0.972568	0.954122		0.998533	0.939777		1.0074	0.989858		0.06	0.897237		0.109	0.906002		0.186	0.869175		0.079	0.907433
	0.9562	0.850797		0.943415	0.84387		1.0288	1.0369		1.06734	1.01379		0.022	0.821717		0.094	0.826072		0.152	0.930783		0.17	0.877176
	1.00908	0.95694		0.978815	0.860866		1.09709	1.19745		1.12932	1.13947		0.115	0.875797		0.04	0.812231		0.35	1.008		0.274	0.931819
	1.06227	1.16651		1.01486	0.90355		0.967852	0.974258		0.970776	1.04899		0.341	1.01415		0.024	0.822229		0.054	0.929629		0.027	0.997923
	0.951152	1.31401		1.00245	0.844984		1.02675	1.14655		1.02705	1.0376		0.089	1.27583		0.133	0.778448		0.061	1.03128		0.112	0.933001
	1.00242	0.952184		0.983044	0.909604		1.00803	0.960588		1.03009	1.03797		0.179	0.877236		0.038	0.854524		0.146	0.880053		0.164	0.930584
	0.969412	0.836814		1.0713	1.1155		0.941925	0.833593		1.1003	1.14884		0.046	0.797197		0.231	0.961622		0.021	0.817303		0.228	0.964258
	0.948613	0.952148		0.954632	0.93114		0.993344	0.993448		1.00711	1.09439		0.079	0.926958		0.092	0.900791		0.128	0.923614		0.087	1.00355
	1.03048	1.08233		0.972614	0.861966		0.955215	0.872388		1.05353	1.04021		0.056	0.969988		0.051	0.818454		0.128	0.843438		0.094	0.91184
	0.970101	1.10444		0.99975	0.853102		0.998787	1.01072		1.00357	1.09476		0.108	1.0514		0.136	0.788051		0.031	0.934554		0.215	1.00743
	1.17877	1.65901		0.943039	1.03923		0.972257	0.833852		1.00455	1.03586		0.403	1.29977		0.085	1.01771		0.041	0.79205		0.051	0.952298
	0.944719	0.815281		1.09741	0.90004		0.950571	0.847974		1.03975	1.04291		0.03	0.796984		0.193	0.75742		0.057	0.82384		0.226	0.926321
	0.955623	0.883885		1.28386	0.887377		0.981531	0.84657		1.01425	0.966961		0.058	0.85419		0.18	0.638316		0.044	0.796532		0.097	0.880461
	2.02807	0.885524		0.979639	0.896403		1.08704	0.923372		1.14501	1.21844		0.876	0.403238		0.03	0.845049		0.15	0.784469		0.316	0.982735
	0.960233	1.05085		0.946368	0.835218		0.979761	0.917233		1.052	1.03606		0.152	1.01066		0.053	0.815051		0.029	0.864579		0.138	0.909527
	0.987238	0.918113		0.954062	0.929991		0.957071	0.831865		1.04645	1.05101		0.021	0.858853		0.102	0.900217		0.026	0.8027		0.233	0.927538
	0.996066	0.916292		0.952461	1.01574		0.93347	0.871454		1.0629	1.05543		0.032	0.849553		0.066	0.984871		0.032	0.862163		0.17	0.917032
	0.963385	0.863445		0.954679	0.921033		0.953206	0.840887		1.04328	1.10111		0.044	0.827714		0.031	0.89097		0.079	0.814696		0.098	0.974708
	0.973499	0.843694		1.00262	1.09002		0.956391	0.884577		0.986666	0.9684		0.087	0.800376		0.143	1.00401		0.058	0.854171		0.08	0.90642
	0.944881	0.829208		0.935445	0.937476		1.01288	1.03327		0.979197	0.944305		0.053	0.81046		0.074	0.925522		0.092	0.942108		0.023	0.89061
	1.02247	0.997355		1.00277	0.874935		0.994996	0.946639		1.10108	1.23372		0.17	0.900835		0.057	0.805783		0.134	0.878634		0.195	1.03477
	0.99208	1.00271		0.961549	1.0073		1.00719	0.900601		1.07563	1.06766		0.166	0.933412		0.028	0.967454		0.123	0.825783		0.261	0.916668
	1.24697	1.8182		0.998745	1.00498		0.966253	0.852196		1.02277	1.11895		0.513	1.34658		0.221	0.929282		0.091	0.814505		0.137	1.01035
	0.952698	0.823236		0.952488	0.881366		0.983059	0.95333		1.0754	1.11786		0.032	0.798019		0.03	0.854558		0.068	0.895589		0.167	0.959978
	1.01578	1.1021		0.963805	0.872432		0.996009	0.835179		1.00988	1.05187		0.04	1.00199		0.066	0.835963		0.039	0.774392		0.057	0.961923
	1.16432	1.37712		0.962692	0.858735		0.977236	1.0815		1.07684	1.15824		0.277	1.0923		0.035	0.823791		0.091	1.02205		0.147	0.993331
	0.932639	0.869634		0.918602	0.841754		0.983973	0.951631		1.0839	1.17835		0.039	0.861129		0.026	0.846259		0.067	0.893162		0.199	1.00399
	0.955724	0.8208		1.21763	1.03078		0.962704	0.85037		1.07828	1.16834		0.024	0.79314		0.066	0.781803		0.099	0.815756		0.189	1.00066
	0.952113	1.1327		1.24535	0.886848		1.03855	1.04018		1.00236	1.02593		0.036	1.09868		0.166	0.657661		0.179	0.924969		0.163	0.945229
	0.982485	0.816246		1.1172	0.864807		0.979037	1.04648		0.973481	0.922635		0.223	0.767256		0.393	0.714882		0.065	0.987136		0.068	0.875281
	0.996475	0.96371		1.00866	1.01147		1.08022	1.13307		0.961572	0.917797		0.172	0.893151		0.17	0.926096		0.129	0.968702		0.034	0.881475
	0.945676	0.836537		0.990822	0.835122		0.93263	0.824489		0.973872	1.01114		0.033	0.816936		0.107	0.778394		0.095	0.816433		0.047	0.958863
	0.958167	0.864512		1.02323	1.03696		0.969102	0.899627		1.02848	0.988499		0.034	0.833248		0.207	0.935904		0.042	0.857309		0.115	0.88762
	1.24573	0.879571		0.944565	0.8453		0.981193	0.879109		1.01661	1.00098		0.294	0.652067		0.034	0.826463		0.024	0.827434		0.038	0.90932
	1.07713	1.13011		1.22707	0.890262		1.079	1.13929		1.09464	1.21533		0.214	0.968937		0.045	0.670026		0.203	0.975114		0.152	1.02534
	1.16669	1.29723		1.07288	1.17924		0.982051	0.96026		1.03463	1.06014		0.421	1.02685		0.102	1.01507		0.082	0.903024		0.108	0.946285
	0.9689	0.878096		0.97834	1.02038		0.976817	0.992767		1.04154	1.01851		0.026	0.836966		0.061	0.963202		0.102	0.938597		0.159	0.903095
	0.973265	1.04494		0.985315	0.922445		0.947654	0.858267		1.06851	1.21235		0.068	0.991532		0.021	0.86459		0.088	0.836406		0.315	1.04785
	1.19281	1.5112		1.08923	0.923536		0.975062	0.917064		1.04294	1.02659		0.282	1.17003		0.351	0.78303		0.04	0.868585		0.16	0.909041
	0.933672	0.825988		0.960761	1.05595		0.994117	1.09122		1.02428	1.02135		0.03	0.817005		0.092	1.01501		0.055	1.01372		0.143	0.920872
	0.932162	0.853914		1.24526	0.871568		0.986348	0.819125		0.998489	0.988075		0.05	0.845995		0.084	0.646375		0.109	0.766947		0.038	0.913885
	0.952867	0.85574		0.993396	1.09614		0.996377	0.938348		1.10508	1.19581		0.067	0.829381		0.056	1.01903		0.071	0.869732		0.237	0.999346
	1.00079	1.11252		0.914065	0.829867		1.09188	1.3379		1.03697	1.04331		0.123	1.02663		0.031	0.838448		0.241	1.1316		0.199	0.929172
	0.992328	0.882328		0.9911	0.871511		0.98716	1.07712		1.02693	1.18595		0.099	0.821145		0.021	0.812083		0.041	1.00767		0.068	1.06652
	0.928693	0.836574		0.988926	0.98315		0.975344	0.856477		1.04825	1.09108		0.022	0.831912		0.113	0.918123		0.056	0.810967		0.136	0.961256
	1.01678	1.30905		1.09383	0.851928		0.976661	0.892598		1.11993	1.16748		0.148	1.18897		0.222	0.719281		0.058	0.844028		0.408	0.962726
	1.03962	1.3062		1.08214	0.938505		0.948687	0.854838		0.956515	0.906342		0.247	1.16033		0.132	0.80094		0.041	0.832158		0.034	0.875076
	0.977155	1.03725		0.993523	0.922306		0.980037	0.974221		1.01399	1.01874		0.189	0.980311		0.102	0.857318		0.051	0.918037		0.108	0.92784
	0.987822	0.96828		1.40905	0.897904		1.05894	1.28446		0.994001	0.923423		0.05	0.905248		0.203	0.588502		0.204	1.1202		0.057	0.857943
	0.942766	0.883161		1.34815	0.991097		1.01374	1.01727		0.977247	0.954393		0.061	0.865129		0.356	0.678928		0.11	0.926725		0.094	0.90192
	0.955825	0.966413		0.979473	0.901996		0.975724	0.862755		1.04894	0.968288		0.184	0.933747		0.056	0.850466		0.033	0.816593		0.029	0.852513
	1.06248	1.20905		1.06101	1.18593		1.01209	1.04849		1.06206	1.04024		0.204	1.05092		0.104	1.03226		0.093	0.95673		0.178	0.904545
	0.983439	1.05076		0.971961	0.996919		1.00544	0.858748		1.02912	1.03442		0.117	0.98674		0.06	0.947231		0.028	0.788777		0.056	0.928271
	0.948806	1.00821		0.982668	0.870818		1.00205	0.978505		1.02873	1.03964		0.061	0.981338		0.043	0.818401		0.07	0.901814		0.102	0.933309
	1.02662	1.00432		1.35059	0.92088		0.996719	0.880811		0.982332	0.963753		0.306	0.903458		0.632	0.629684		0.079	0.816121		0.066	0.90605
	0.930046	1.06719		1.00435	1.07803		0.983692	1.04042		0.9536	1.05227		0.038	1.0597		0.145	0.991271		0.123	0.976778		0.079	1.01907
	1.00144	0.893681		1.25158	0.883929		0.998564	0.869816		0.987445	0.91108		0.023	0.824146		0.302	0.652232		0.09	0.804445		0.102	0.852096
	0.9147	0.829418		1.05327	0.905714		0.978969	0.855473		0.971645	0.988188		0.034	0.837413		0.15	0.794138		0.055	0.807016		0.11	0.939241
	0.950782	0.911823		1.05058	0.84963		1.00948	1.03266		1.05188	1.01343		0.034	0.885675		0.057	0.746875		0.058	0.944728		0.12	0.889757
	0.965025	0.885636		0.922385	0.87271		0.960825	0.845414		1.05005	1.09838		0.112	0.847543		0.039	0.873782		0.041	0.812588		0.148	0.966023
	1.09213	1.14813		1.07133	1.07572		1.01182	1.01852		0.988505	0.976154		0.329	0.970866		0.125	0.927302		0.125	0.929631		0.026	0.911978
	0.946851	0.870865		1.01903	0.84444		1.03027	0.9807		1.05718	1.15506		0.063	0.849403		0.126	0.76529		0.128	0.879084		0.184	1.00902
	0.946861	0.993496		0.937604	0.858927		0.980242	1.10421		1.00554	1.01117		0.03	0.969002		0.063	0.846022		0.025	1.04031		0.161	0.928689
	1.00313	0.913014		0.958803	0.859247		0.981552	0.862739		1.1154	1.24424		0.029	0.840554		0.052	0.827625		0.075	0.811729		0.261	1.03019
	1.00486	1.31802		0.982801	0.916957		0.975728	0.865545		1.06273	1.0582		0.077	1.21132		0.224	0.861645		0.06	0.819231		0.12	0.919582
	0.940775	0.845196		1.14762	0.917768		0.931211	0.812696		1.00535	1.03912		0.049	0.829691		0.122	0.738553		0.034	0.805981		0.082	0.954538
	0.934869	0.813842		0.971166	1.04643		0.983678	0.83372		1.0837	1.09194		0.032	0.80396		0.056	0.995086		0.046	0.782731		0.198	0.930539
	0.976658	0.866054		0.976895	1.03396		0.955672	0.860845		1.02709	1.02361		0.034	0.818931		0.078	0.977462		0.148	0.831881		0.094	0.920385
	0.984208	0.833091		1.0423	1.03787		1.07989	1.05283		1.04398	1.08239		0.032	0.781718		0.117	0.919585		0.325	0.900374		0.136	0.9575
	0.974742	0.899792		0.985869	1.05456		0.952023	0.830429		0.97315	1.00833		0.11	0.852506		0.051	0.987866		0.04	0.805564		0.036	0.9569
	0.970062	0.8277		1.08878	0.851774		0.956534	0.837478		1.05242	1.12231		0.021	0.787986		0.131	0.722488		0.024	0.80857		0.096	0.98484
	0.958773	0.81514		1.01073	0.84263		0.978552	0.86162		1.07062	1.07147		0.026	0.785165		0.102	0.769919		0.057	0.813162		0.208	0.924248
	0.966519	0.917487		0.948268	0.835095		0.972214	0.832216		1.01251	1.01255		0.062	0.876667		0.029	0.813298		0.046	0.790532		0.191	0.923555
	0.966832	1.08411		1.03204	0.878571		0.959266	1.04114		1.00546	0.985807		0.081	1.03554		0.055	0.786188		0.079	1.00234		0.06	0.905464
	0.975852	0.872509		0.933669	0.819928		0.976328	0.858413		0.993426	0.994866		0.082	0.825716		0.021	0.811013		0.066	0.81198		0.063	0.924856
	0.979904	0.853158		0.959715	0.859386		0.998327	0.968995		0.980286	0.857827		0.096	0.804065		0.05	0.826972		0.124	0.896383		0.02	0.80815
	1.03225	1.05283		0.92007	0.837819		0.976516	0.935546		1.00724	1.04735		0.158	0.941928		0.02	0.840958		0.104	0.88477		0.066	0.960289
	0.950967	0.917788		1.03578	1.01975		0.975047	1.03396		0.973901	0.903024		0.083	0.891295		0.104	0.909218		0.073	0.979319		0.048	0.856306
	0.939711	0.822917		1.17806	0.889141		1.00502	0.945391		1.01047	0.964516		0.031	0.808736		0.31	0.697022		0.154	0.868724		0.146	0.881517
	0.931858	0.806126		0.939795	0.85355		0.987509	0.867484		1.06063	1.1484		0.07	0.79891		0.02	0.838766		0.044	0.81127		0.112	0.999946
	0.942645	0.925488		0.957669	0.995092		1.00458	1.00291		1.02372	1.05104		0.033	0.906709		0.039	0.959606		0.173	0.921977		0.127	0.948169
	0.934494	0.846316		1.00964	0.979923		0.929101	0.817187		1.05488	1.1386		0.042	0.836375		0.07	0.896336		0.065	0.812275		0.16	0.996806
	0.993853	1.07485		1.10827	0.861493		0.976343	0.960184		1.08111	1.11726		0.131	0.998787		0.239	0.71788		0.144	0.908232		0.236	0.954405
	0.960411	0.924701		0.998601	0.882016		0.988948	0.851894		1.01073	0.979742		0.171	0.889178		0.028	0.815697		0.066	0.795531		0.056	0.895203
	0.999058	0.917928		0.97372	0.831347		1.00428	0.912282		1.06143	1.05726		0.039	0.848521		0.021	0.788484		0.078	0.838922		0.158	0.919885
	0.954644	0.823242		0.969591	0.94763		1.04961	1.02335		0.994743	1.02257		0.041	0.796399		0.079	0.902599		0.197	0.900418		0.127	0.949353
	0.992055	0.967974		0.963637	0.90189		0.990372	0.859044		1.03311	1.0391		0.111	0.9011		0.17	0.864341		0.047	0.801054		0.173	0.928866
	0.936798	0.948376		1.10781	0.881789		1.00304	0.846633		1.11132	1.24549		0.03	0.934932		0.183	0.735094		0.025	0.779506		0.441	1.03501
	0.959729	0.928865		0.959219	0.861727		0.978616	0.826974		1.00317	1.07511		0.097	0.893818		0.107	0.829654		0.077	0.780413		0.049	0.989742
	0.96703	1.0408		0.942066	0.817443		0.972248	0.960237		0.999875	1.03531		0.17	0.993968		0.029	0.801348		0.122	0.912108		0.1	0.956247
	0.932266	0.820225		0.994449	1.1063		1.00002	0.888983		0.976102	1.0218		0.053	0.812528		0.12	1.02739		0.045	0.820977		0.125	0.966749
	1.03659	1.35414		1.28053	0.872288		0.959755	0.837793		1.04052	1.11801		0.157	1.20643		0.367	0.629093		0.02	0.80616		0.074	0.992295
	0.979786	0.8142		1.02674	0.935838		1.01361	1.03531		1.09373	1.09964		0.087	0.76744		0.147	0.841753		0.123	0.943291		0.162	0.928502
	1.02508	1.08075		0.9937	0.914019		1.02432	1.05775		1.05457	1.09318		0.197	0.973672		0.027	0.849464		0.125	0.95366		0.132	0.957325
	1.00825	1.00129		1.01139	1.01721		0.942782	0.872778		1.13484	1.11458		0.156	0.917146		0.071	0.928829		0.039	0.854943		0.2	0.90703
	0.962336	0.848537		1.01478	0.888789		1.00965	1.30404		0.971559	0.996953		0.069	0.814309		0.022	0.808855		0.118	1.19279		0.139	0.947655
	1.14568	1.26229		1.01957	0.836551		0.948733	0.814094		0.971543	0.943272		0.18	1.01752		0.125	0.757738		0.032	0.792456		0.02	0.896644
	0.953097	0.820775		1.00782	0.860101		0.97078	0.861357		0.977266	0.885507		0.021	0.795301		0.026	0.788152		0.069	0.819421		0.056	0.836805
	1.00175	0.963266		0.939721	0.908066		1.03465	1.01964		1.06934	1.09437		0.102	0.888039		0.043	0.892408		0.148	0.91012		0.173	0.945136
	1.09526	1.38094		0.961271	0.854667		0.918911	0.829301		1.02846	1.00049		0.174	1.16441		0.021	0.821099		0.097	0.833458		0.125	0.8984
	0.946685	0.833764		0.967062	0.853872		0.945661	0.823331		1.07523	1.05199		0.073	0.81336		0.139	0.815423		0.07	0.804052		0.089	0.903555
	1.0351	1.05495		0.977654	0.864819		0.956089	0.870043		1.02317	1.10888		0.266	0.941221		0.044	0.81693		0.043	0.840402		0.136	1.00088
	1.06951	1.32398		1.04636	0.87415		1.02679	1.06032		1.08491	1.1093		0.156	1.14326		0.051	0.771525		0.163	0.953677		0.225	0.944282
	0.93193	0.821231		0.975131	0.854985		0.947469	0.837427		0.991681	1.02987		0.081	0.813817		0.083	0.809731		0.031	0.816257		0.123	0.959081
	0.959115	0.847667		0.975054	0.853254		0.9433	0.880988		0.993606	1.04379		0.034	0.816206		0.052	0.808154		0.03	0.862512		0.043	0.970164
	1.00704	1.2626		1.01696	0.925725		0.943617	0.82102		0.97813	0.977047		0.147	1.15789		0.051	0.840661		0.046	0.803532		0.026	0.922495
	1.04591	1.15741		1.03056	1.02985		0.998696	0.98145		1.04735	1.03411		0.164	1.02197		0.071	0.922874		0.148	0.907569		0.151	0.911839
	0.93694	0.854968		0.978615	0.921745		0.998348	1.14647		1.04488	1.13024		0.031	0.842719		0.055	0.869849		0.083	1.06053		0.177	0.998954
	0.952827	0.874853		0.977139	0.854226		0.961255	0.868097		0.980974	0.979933		0.042	0.847941		0.049	0.807349		0.039	0.834016		0.022	0.922537
	0.979807	0.871858		0.967303	0.822653		0.969796	0.954806		1.02043	1.02695		0.086	0.82177		0.022	0.785414		0.12	0.909242		0.124	0.929421
	0.962721	0.826853		1.02165	0.977924		0.979401	0.861712		0.999288	1.07283		0.066	0.793183		0.099	0.88399		0.028	0.812544		0.076	0.991481
	0.968954	0.862685		0.931987	0.838973		0.95939	0.983354		0.995185	1.11528		0.041	0.822231		0.094	0.831349		0.079	0.946585		0.081	1.03496
	1.03395	1.00851		0.954127	0.829927		0.988772	0.917861		1.08038	1.0985		0.307	0.900798		0.043	0.803302		0.102	0.857286		0.272	0.939011
	0.961847	0.826067		0.947449	0.83882		0.982236	0.866276		1.04409	1.04402		0.034	0.793148		0.048	0.817633		0.089	0.814489		0.148	0.923456
	0.957114	1.00381		0.967174	0.983823		0.983616	0.833962		0.995746	1.09789		0.035	0.96858		0.074	0.939415		0.054	0.783007		0.112	1.01825
	0.922666	0.838944		0.928091	0.8604		0.98969	1.04287		0.991087	1.00485		0.053	0.839718		0.042	0.856159		0.097	0.973138		0.048	0.93634
	0.934897	0.848697		0.980875	0.858628		0.949047	0.879189		1.01427	1.03469		0.047	0.838366		0.096	0.808418		0.03	0.855538		0.063	0.942108
	1.00932	1.04994		1.02668	1.10476		1.06028	1.05778		1.0003	0.986606		0.215	0.960681		0.153	0.993749		0.176	0.92134		0.19	0.910878
	0.929545	0.860014		1.07992	1.14586		0.95769	0.935086		0.996432	1.04504		0.054	0.854437		0.138	0.9799		0.025	0.90172		0.053	0.968571
	0.968189	0.8331		1.00736	1.05505		0.952732	0.891758		0.984352	0.926711		0.021	0.794662		0.053	0.967238		0.022	0.864412		0.042	0.869439
	0.957613	0.863584		1.01018	0.893404		0.976196	0.879898		1.03671	1.04648		0.028	0.832837		0.076	0.816756		0.045	0.832416		0.17	0.932224
	1.10861	1.13036		0.961301	0.968176		0.996968	0.91535		1.01455	1.01776		0.127	0.941636		0.057	0.930122		0.211	0.847912		0.128	0.92644
	0.945696	0.819966		0.964239	0.831571		0.987665	0.849044		1.03113	1.07489		0.062	0.800735		0.036	0.796452		0.117	0.793899		0.193	0.962706
	1.17045	1.22415		0.969649	0.88402		0.991603	1.02263		1.02859	1.04093		0.29	0.965889		0.047	0.841963		0.127	0.952413		0.166	0.934596
	0.947695	0.859112		1.11542	1.10875		0.996247	1.07572		0.997669	0.982259		0.024	0.837194		0.179	0.918		0.146	0.997185		0.103	0.909253
	0.93989	0.839251		0.961901	0.908277		0.959424	0.883519		1.05238	1.12651		0.021	0.824631		0.033	0.872033		0.088	0.850453		0.035	0.98857
	1.05861	1.15488		1.00646	0.940426		0.986758	0.928571		1.02696	1.05032		0.196	1.0075		0.034	0.862926		0.068	0.86906		0.204	0.944524
	1.06867	1.25918		0.974338	1.03949		0.993519	1.08904		1.02596	1.13123		0.119	1.08815		0.036	0.985273		0.059	1.01231		0.097	1.01828
	0.977401	1.09277		1.03625	0.852821		0.9978	0.809364		0.990458	0.954318		0.083	1.03252		0.155	0.760043		0.094	0.74911		0.09	0.88982
	1.06948	1.27175		0.965163	0.966845		1.0037	1.08224		1.02365	1.15793		0.273	1.09818		0.111	0.925126		0.058	0.995779		0.097	1.04466
	1.16397	0.825109		0.908516	0.935999		0.980727	0.847144		1.00307	1.04059		0.283	0.65466		0.025	0.951454		0.079	0.797726		0.041	0.958059
	0.977309	0.823882		1.01014	1.00383		0.977406	0.884499		1.04475	1.12082		0.216	0.778535		0.17	0.91775		0.128	0.835733		0.164	0.990765
	0.891843	0.808975		0.923605	0.877716		0.971285	0.943605		1.07462	1.1061		0.043	0.837706		0.05	0.877633		0.134	0.897198		0.113	0.950569
	0.949629	0.914503		1.00969	0.998395		0.948433	0.92903		1.03394	1.18897		0.109	0.889358		0.156	0.913185		0.077	0.904625		0.051	1.06199
	0.952088	0.874245		1.07484	1.15034		0.997651	0.95288		0.982911	0.98206		0.041	0.84801		0.204	0.988391		0.137	0.882073		0.073	0.922718
	0.96254	0.884989		0.963417	0.841793		0.969022	0.864303		1.00595	1.0064		0.042	0.849111		0.043	0.80693		0.111	0.823715		0.102	0.923929
	0.971564	0.935702		1.03676	1.25689		1.03956	1.13586		1.05122	1.08241		0.11	0.889429		0.142	1.11959		0.151	1.00906		0.14	0.950914
	0.949038	1.23425		0.907366	0.842151		0.96156	0.864009		1.01991	1.04287		0.102	1.20105		0.029	0.857141		0.056	0.829825		0.062	0.944303
	0.934187	0.815027		1.06613	0.951512		0.963684	0.87824		0.979305	0.884293		0.021	0.805719		0.051	0.82423		0.07	0.841634		0.075	0.833917
	0.9503	1.08594		0.987576	0.889157		0.940208	0.839538		1.06233	1.06376		0.064	1.05534		0.129	0.831483		0.047	0.824635		0.037	0.924755
	0.987798	0.851277		0.971954	0.935222		1.00829	1.02316		1.0357	1.07726		0.075	0.79588		0.051	0.888616		0.104	0.937131		0.086	0.960579
	0.988184	0.841902		0.992867	0.86377		1.01141	0.985045		1.0356	1.12083		0.086	0.786808		0.205	0.803437		0.232	0.899439		0.106	0.99952
	0.975922	0.900747		0.918059	0.841618		0.990498	0.974629		1.02355	1.04237		0.064	0.852379		0.057	0.846621		0.034	0.908722		0.109	0.940493
	0.965729	0.893308		0.972649	0.850044		0.950419	0.884291		1.00412	1.04585		0.093	0.854262		0.046	0.807105		0.021	0.859261		0.078	0.961905
	1.06237	1.14212		1.04655	1.02481		0.968092	0.866616		0.988045	1.03555		0.159	0.99284		0.081	0.904333		0.022	0.826713		0.069	0.967919
	0.929459	0.853581		1.02494	0.943327		1.02434	0.831024		0.980825	1.11276		0.032	0.848125		0.112	0.849983		0.17	0.749226		0.057	1.04775
	0.961741	0.824021		0.899335	0.835268		0.979392	0.820212		1.03748	1.02893		0.028	0.791271		0.078	0.857727		0.043	0.773418		0.028	0.915902
	0.957456	0.963372		1.08589	0.873478		1.01927	0.842236		1.00415	1.00088		0.033	0.929224		0.21	0.742867		0.158	0.76311		0.129	0.920518
	1.0483	1.3219		0.915335	0.876123		0.994786	0.940472		1.00077	1.04013		0.232	1.16455		0.034	0.883955		0.039	0.873095		0.082	0.959843
	0.989841	1.02507		0.997115	0.855248		1.00072	0.902949		1.05533	1.11942		0.114	0.956389		0.06	0.792121		0.097	0.833288		0.102	0.979606
	0.992908	0.947771		0.966682	0.925588		0.990834	0.970308		0.978116	0.937878		0.099	0.881535		0.044	0.884258		0.122	0.904386		0.044	0.885526
	0.932396	0.814957		0.96575	1.01982		0.977119	1.09895		1.03901	1.06851		0.034	0.807196		0.093	0.975225		0.044	1.03866		0.135	0.949741
	0.992166	0.849057		0.97287	0.976237		0.974118	0.978422		1.10223	1.21289		0.056	0.79031		0.025	0.926713		0.044	0.927597		0.166	1.01624
	0.955607	0.835097		0.960121	0.835093		1.02977	1.0479		1.02628	0.981888		0.025	0.807054		0.087	0.803256		0.154	0.939777		0.117	0.883566
	0.945593	0.890689		0.953379	0.86439		0.961492	0.850773		0.960768	1.00869		0.032	0.869895		0.024	0.837315		0.118	0.817171		0.067	0.969582
	0.951088	1.04279		0.981708	1.02462		0.952897	0.84731		1.05088	1.07384		0.068	1.01256		0.067	0.963887		0.052	0.821185		0.136	0.943693
	0.988135	0.852446		0.99793	0.892397		0.990506	0.94825		1.02607	1.08447		0.079	0.796701		0.041	0.825854		0.062	0.884119		0.179	0.976083
	0.979441	0.836677		1.02103	0.833779		0.954245	0.856768		1.06011	1.1098		0.086	0.788905		0.059	0.754149		0.027	0.829179		0.154	0.966804
	0.967443	0.860683		0.97639	0.887336		0.974756	0.824658		1.05371	1.0656		0.097	0.821605		0.06	0.839286		0.028	0.781309		0.217	0.933938
	0.988695	1.09974		0.974741	0.883926		1.09319	1.05137		0.993525	0.990094		0.072	1.02724		0.058	0.837474		0.362	0.88819		0.057	0.920327
	0.93908	0.829454		0.974171	0.859497		0.983046	1.00555		1.04964	1.09772		0.042	0.815708		0.041	0.814807		0.074	0.944655		0.146	0.965815
	0.998134	1.15865		0.991059	0.943321		0.964483	0.879039		1.02481	0.977165		0.148	1.07203		0.032	0.879032		0.036	0.841702		0.079	0.880584
	0.960263	0.914046		0.945036	0.95656		1.02851	0.995895		1.03701	1.16358		0.051	0.879069		0.05	0.934779		0.174	0.894233		0.125	1.03624
	0.935994	0.863514		1.0068	0.913874		0.961111	0.856224		1.00072	1.06451		0.04	0.852004		0.048	0.838281		0.064	0.822733		0.106	0.982388
	0.981809	1.05077		0.955208	0.942482		0.977275	0.930394		1.12545	1.24488		0.021	0.988382		0.044	0.911214		0.057	0.879215		0.148	1.02152
	0.943629	0.846095		0.979054	0.936935		1.00506	0.836529		0.965471	1.06158		0.027	0.828062		0.189	0.883787		0.119	0.768662		0.075	1.01544
	0.929287	0.849731		0.955475	0.839254		0.944948	0.886168		1.01993	1.02446		0.025	0.844455		0.062	0.811183		0.042	0.86607		0.138	0.927625
	0.987477	0.857677		1.4081	0.886041		0.98566	1.00226		1.10297	1.18955		0.051	0.802124		0.402	0.581121		0.147	0.939073		0.161	0.996011
	0.985376	0.873948		0.906469	0.815727		0.963553	0.865985		0.990284	0.893178		0.024	0.819084		0.021	0.831069		0.059	0.830003		0.051	0.832958
	0.969708	0.985213		0.992935	0.890074		0.932245	0.852879		1.07764	1.14027		0.074	0.938283		0.084	0.827847		0.105	0.844894		0.073	0.977188
	1.11451	1.12145		0.965904	0.923516		0.934346	0.829733		1.02596	1.02534		0.235	0.929272		0.031	0.882989		0.02	0.820117		0.149	0.922965
	1.02428	1.04516		1.00702	0.867957		0.972712	0.902976		1.13945	1.19305		0.146	0.94234		0.083	0.795987		0.073	0.857308		0.211	0.966962
	0.953384	0.848567		0.970516	0.825412		1.00665	1.03737		1.00741	1.05253		0.023	0.821984		0.02	0.785439		0.06	0.951699		0.22	0.964887
	0.929777	0.855385		0.99551	0.877512		0.987437	0.884016		1.01267	1.09776		0.072	0.849627		0.043	0.814052		0.023	0.826791		0.153	1.00112
	1.03093	1.09473		0.942014	0.858323		0.987171	0.995125		0.933517	0.901359		0.21	0.980671		0.094	0.841469		0.08	0.930958		0.062	0.891704
	0.989923	0.953893		1.25225	0.854245		0.987136	0.933029		1.0475	1.04885		0.121	0.889904		0.182	0.629997		0.073	0.872897		0.14	0.924708
	1.06805	1.385		0.968684	0.882739		0.970271	0.851917		0.977669	0.925577		0.21	1.19758		0.027	0.841579		0.045	0.810866		0.058	0.87431
	0.96952	0.882029		1.00549	1.03919		0.986644	0.889316		1.05887	1.12375		0.118	0.840177		0.117	0.954471		0.117	0.832416		0.155	0.980104
	0.939506	0.835358		0.958161	0.944227		0.992417	0.842558		1.08455	1.23448		0.042	0.821142		0.034	0.910086		0.052	0.784062		0.238	1.05119
	1.02959	1.02175		0.993419	1.03658		0.964328	0.881772		0.995611	1.05235		0.18	0.916482		0.057	0.963645		0.09	0.844455		0.032	0.976145
	0.996687	0.86758		0.985269	1.04862		0.982972	0.832337		1.0383	1.14846		0.048	0.803889		0.022	0.982899		0.043	0.781993		0.065	1.0215
	1.01669	1.18765		0.994414	0.893504		0.995608	0.979367		1.03051	0.998115		0.129	1.07881		0.04	0.829801		0.1	0.908452		0.132	0.894488
	1.03616	1.08178		1.01759	1.0732		0.980119	0.839585		1.02519	0.960988		0.14	0.964176		0.158	0.973981		0.054	0.791099		0.113	0.865679
	0.977553	0.900135		0.934887	0.905748		1.02042	1.01709		1.03318	1.09458		0.021	0.850379		0.044	0.894733		0.148	0.920495		0.116	0.978399
	0.936435	0.823511		0.982049	0.962683		0.983189	0.852088		1.11352	1.10541		0.046	0.812151		0.052	0.905306		0.038	0.800372		0.272	0.916786
	1.03609	1.14386		0.996499	0.991795		0.947792	0.848094		0.984845	0.989937		0.151	1.01958		0.149	0.919158		0.02	0.826373		0.107	0.928292
	0.982901	0.881357		1.27991	0.95976		0.972645	0.833538		0.99907	1.07104		0.07	0.828107		0.191	0.692511		0.022	0.791436		0.087	0.990047
	0.9402	0.896995		0.975463	0.943306		0.960962	0.828768		1.01338	1.03975		0.075	0.881078		0.094	0.893072		0.039	0.796474		0.125	0.947551
	1.01435	1.19141		0.9541	0.870517		1.00151	0.945702		1.06482	1.14527		0.186	1.08473		0.027	0.842613		0.106	0.872054		0.145	0.993294
	0.92898	0.922124		0.963331	1.08906		0.984257	1.0045		0.98665	1.00851		0.167	0.916702		0.146	1.04405		0.092	0.942513		0.125	0.943975
	0.933514	0.822617		1.00405	0.856764		0.989219	0.960686		1.03711	1.13483		0.021	0.813808		0.039	0.788041		0.082	0.89688		0.175	1.01054
	1.02116	1.03321		1.04606	0.868348		1.00852	0.939342		1.03982	0.901788		0.05	0.934415		0.2	0.766624		0.222	0.860169		0.08	0.800923
	0.979255	0.883031		1.02031	0.952657		0.951565	0.850182		0.9648	0.865714		0.051	0.83277		0.036	0.862283		0.02	0.825122		0.065	0.828671
	0.966895	0.901176		1.00826	0.859363		0.950784	0.97208		1.02964	1.00623		0.02	0.860747		0.081	0.787136		0.092	0.944202		0.16	0.902514
	1.05537	1.15982		1.40675	1.56512		0.968419	0.854397		1.00808	0.979934		0.328	1.01492		0.58	1.02748		0.055	0.814782		0.082	0.897731
	1.02378	1.13744		1.01561	1.03886		0.957507	0.872154		1.01061	1.08796		0.249	1.02604		0.073	0.944651		0.122	0.841194		0.063	0.994204
	0.990524	1.01076		1.01924	0.875825		0.957574	0.831355		0.956115	0.939122		0.235	0.942387		0.055	0.793571		0.032	0.801788		0.069	0.907104
	0.968668	0.833197		0.989594	0.867777		0.943434	0.823372		1.01	0.981147		0.051	0.794361		0.048	0.809834		0.037	0.80599		0.142	0.897138
	1.05168	1.09796		0.982513	0.985086		0.955981	0.893539		0.966623	0.908629		0.157	0.96416		0.032	0.925936		0.061	0.863195		0.042	0.868109
	0.966558	1.06545		0.969502	0.822615		0.955308	0.866693		1.00014	1.02473		0.046	1.018		0.098	0.783597		0.047	0.837851		0.162	0.946222
	1.03658	0.96548		0.985196	1.08449		0.943637	0.835158		1.06448	1.14723		0.104	0.860169		0.079	1.0166		0.024	0.817351		0.162	0.995311
	0.963922	0.846603		1.01891	1.06918		0.977539	0.915013		1.05077	1.10784		0.048	0.811116		0.064	0.969083		0.024	0.864447		0.244	0.97368
	0.961568	0.986125		1.19413	0.922685		0.965255	0.831627		1.00072	0.986824		0.175	0.947102		0.05	0.713584		0.023	0.795667		0.039	0.910695
	1.00507	1.04184		1.04912	0.866078		0.999465	0.880193		0.993161	0.946404		0.053	0.95731		0.115	0.76239		0.049	0.813308		0.149	0.880039
	1.01388	1.10183		1.01416	1.00581		0.922535	0.851895		1.06235	1.08991		0.128	1.00362		0.086	0.915912		0.025	0.852801		0.282	0.947476
	1.05012	1.07781		1.07258	0.887178		0.958736	0.83788		0.995849	0.985197		0.155	0.947868		0.05	0.763882		0.023	0.807101		0.063	0.913639
	1.00531	0.950522		1.24194	0.891969		0.983548	0.921375		1.03908	1.09495		0.063	0.873191		0.076	0.663276		0.046	0.865139		0.13	0.973178
	0.962196	0.901195		0.978655	0.934661		0.982549	1.03197		1.0311	1.09114		0.068	0.864968		0.028	0.882002		0.02	0.969964		0.096	0.977291
	1.08225	1.11288		0.967029	0.832788		1.15599	1.52913		0.975832	0.910649		0.15	0.949656		0.036	0.795316		0.262	1.22162		0.071	0.861829
	0.918488	0.858334		1.08662	0.852006		0.991005	0.889464		0.989129	0.969762		0.057	0.863034		0.095	0.724121		0.089	0.828891		0.083	0.905435
	0.956133	0.832534		0.911514	0.841689		0.993984	0.895402		0.969278	0.992214		0.039	0.804134		0.059	0.852773		0.061	0.831924		0.055	0.945371
	1.03808	1.22907		1.07865	0.896472		0.987391	0.851085		1.0186	1.02949		0.144	1.09343		0.241	0.767543		0.028	0.796029		0.08	0.933392
	0.94704	0.87573		0.908813	0.840826		1.04091	0.826229		0.981998	1.10629		0.05	0.853978		0.033	0.854431		0.149	0.733047		0.066	1.04041
	1.00399	1.10402		0.900508	0.851462		1.03359	1.1537		1.05779	1.17255		0.114	1.01553		0.02	0.873218		0.149	1.03083		0.16	1.02371
	1.06022	1.33526		1.1991	0.897574		0.996805	0.919471		0.96551	0.960419		0.292	1.16309		0.186	0.691291		0.07	0.851869		0.059	0.918648
	0.962954	0.823874		0.929482	0.820276		0.949513	0.901635		0.982243	0.993906		0.04	0.790133		0.034	0.815012		0.09	0.87695		0.06	0.934483
	1.003	0.927904		1.02585	0.857289		1.01727	0.987942		1.10867	1.1189		0.029	0.854377		0.023	0.771773		0.138	0.896895		0.201	0.932032
	1.01534	0.948601		1.02384	1.05921		1.00718	1.10272		0.948213	0.845915		0.132	0.862813		0.076	0.955422		0.123	1.01112		0.028	0.823883
	0.9789	0.835071		1.0748	0.87406		0.972466	0.851655		1.00846	1.09395		0.028	0.787826		0.217	0.751033		0.088	0.808787		0.059	1.00181
	1.03238	1.13852		1.04392	1.31683		0.979019	0.855756		0.996533	0.98558		0.053	1.01847		0.212	1.16495		0.086	0.807242		0.119	0.913367
	1.01347	1.06079		0.976465	0.981425		0.972767	0.915731		1.08859	1.08073		0.11	0.966639		0.141	0.928208		0.071	0.869368		0.122	0.916846
	0.983609	0.931829		1.04365	0.861722		0.965925	0.865597		1.00726	0.97839		0.081	0.8749		0.272	0.762529		0.087	0.827594		0.113	0.897051
	0.960906	0.8379		0.977504	0.963296		0.96517	0.833187		1.08391	1.20077		0.028	0.805298		0.037	0.910095		0.049	0.79723		0.29	1.02308
	1.0112	1.15973		1.12311	1.0005		0.965921	0.836535		1.01022	1.10878		0.048	1.05917		0.18	0.822694		0.044	0.799812		0.028	1.01361
	0.918196	0.80759		0.92592	0.859046		0.968903	0.830952		0.952451	0.889048		0.063	0.81227		0.032	0.856816		0.081	0.792028		0.025	0.86204
	1.10814	1.16861		1.13785	1.40082		0.986681	0.974629		0.993839	1.01781		0.269	0.973906		0.229	1.13696		0.039	0.912237		0.067	0.945792
[truncated: 7,853 more rows]
