# Supplementary material for: A DARPin-based molecular toolset to probe gephyrin and inhibitory synapse biology
Source: eLife journal article supplement (doi:10.7554/elife.80895), 2022-10-31
Supplement: supp [file elife-80895-supp-v1.zip › elife_poa_e80895_Figure_5_source_data_1.xlsx]

## Sheet: Panel  C + D
	Panel C + D: List of identified protein interactors using antibody 3B11 or DARPins 27B3, 27F3, or 27G2 and comparison with literature identified gephyrin interactors
	Interactors list (identified by a given gephyrin binder)
	3B11			27B3			27F3			27G2			All DARPins (overalapping)			Canonical Gephyrin Interactors				Uezu 2016 Gephyrin Interactors
	Uniprot	Protein		Uniprot	Protein		Uniprot	Protein		Uniprot	Protein		Uniprot	Protein		Uniprot	Protein Name			Uniprot	Protein Name
	Q62417	SRBS1		P62259	1433E		P68510	1433F		Q9CQV8	1433B		P68510	1433F		Q3UTH8	ARHG9			P84309	ADCY5
	Q9JIS5	SV2A		P68510	1433F		P61982	1433G		P62259	1433E		P61982	1433G		Q9D2N4	DTNA			Q3TPE9	ANKY2
	Q6PER3	MARE3		P61982	1433G		O70456	1433S		P68510	1433F		O70456	1433S		P63168	DYL1			Q9JIF0	ANM1
	Q5SSM3	RHG44		O70456	1433S		P68254	1433T		P61982	1433G		P68254	1433T		Q9D0M5	DYL2			Q99NH0	ANR17
	Q6RHR9	MAGI1		P68254	1433T		Q6P1F6	2ABA		O70456	1433S		Q6P1F6	2ABA		Q03173	ENAH			Q8R2R9	AP3M2
	Q61696	HS71A		P63101	1433Z		Q9D2V5	AAR2		P68254	1433T		Q7TPR4	ACTN1		P70429	EVL			Q9R0Q6	ARC1A
	Q62426	CYTB		Q76MZ3	2AAA		Q7TPR4	ACTN1		P63101	1433Z		Q3UHD9	AGAP2		P62812	GBRA1			Q3UTH8	ARHG9
	Q8BRT1	CLAP2		Q6P1F6	2ABA		Q3UHD9	AGAP2		Q76MZ3	2AAA		P46660	AINX		P26048	GBRA2			Q8BWG8	ARRB1
	Q9JHU4	DYHC1		Q9D2V5	AAR2		P46660	AINX		Q6P1F6	2ABA		A2AJA9	AJM1		P26049	GBRA3			Q8C0M9	ASGL1
	Q8BK67	RCC2		Q8CBW3	ABI1		A2AJA9	AJM1		Q8CBW3	ABI1		Q8C8R3	ANK2		Q8BHJ7	GBRA5			P97370	AT1B3
	P61264	STX1B		P62484	ABI2		Q8C8R3	ANK2		Q9JIX8	ACINU		P17426	AP2A1		P63137	GBRB2			P35564	CALX
	Q3UJB9	EDC4		Q9JIX8	ACINU		G5E8K5	ANK3		Q99MR0	ACL6B		Q3UTH8	ARHG9		P63080	GBRB3			Q5M8N0	CNRP1
	Q9Z2Q6	SEPT5		Q99MR0	ACL6B		Q922H1	ANM3		P60710	ACTB		Q9JM76	ARPC3		P22723	GBRG2			P12960	CNTN1
	P17182	ENOA		Q99KI0	ACON		P17426	AP2A1		Q7TPR4	ACTN1		Q8C0M9	ASGL1		Q8BUV3	GEPH			Q9CQI6	COTL1
	P63137	GBRB2		P60710	ACTB		Q3UTH8	ARHG9		P68134	ACTS		Q80YN3	BCAS1		Q64018	GLRA1			Q812E0	CPEB2
	Q8CGF6	WDR47		P63260	ACTG		Q9JM76	ARPC3		P48962	ADT1		P20029	BIP		P48168	GLRB			Q7TN99	CPEB3
	O35927	CTND2		Q7TPR4	ACTN1		Q8C0M9	ASGL1		P51881	ADT2		O88737	BSN		Q3TES0	IQEC3			Q9Z140	CPNE6
	Q62419	SH3G1		P48962	ADT1		Q4QY64	ATAD5		Q3UHD9	AGAP2		P15116	CADH2		Q69ZK9	NLGN2			P63034	CYH2
	P30999	CTND1		P51881	ADT2		Q80TZ3	AUXI		P46660	AINX		Q3UHL1	CAMKV		Q9QUR7	PIN1			Q9D2N4	DTNA
	Q64521	GPDM		Q3UHD9	AGAP2		Q80YN3	BCAS1		A2AJA9	AJM1		P16330	CN37		P62962	PROF1			P51141	DVL1
	Q9R1T4	SEPT6		Q8CJG0	AGO2		Q8K019	BCLF1		Q9DBE8	ALG2		Q80YA9	CNKR2		Q9JJV2	PROF2			Q61062	DVL3
	P42932	TCPQ		P46660	AINX		P20029	BIP		Q7TQF7	AMPH		P18760	COF1		Q811P8	RHG32			P63168	DYL1
	Q9QUR7	PIN1		A2AJA9	AJM1		O88737	BSN		Q8C8R3	ANK2		Q9CQF3	CPSF5						Q9D0M5	DYL2
	P26048	GBRA2		Q9DBE8	ALG2		P15116	CADH2		Q9JIF0	ANM1		Q922C1	CS044						P56564	EAA1
	Q4QY64	ATAD5		Q7TQF7	AMPH		Q3UHL1	CAMKV		Q8BIZ1	ANS1B		Q6P9K8	CSKI1						Q03173	ENAH
	P46460	NSF		Q8C8R3	ANK2		P26361	CFTR		O35643	AP1B1		Q61301	CTNA2						Q9R0P3	ESTD
	Q80YA9	CNKR2		Q9JIF0	ANM1		P16330	CN37		P35585	AP1M1		Q02248	CTNB1						P70429	EVL
	P28660	NCKP1		Q922H1	ANM3		Q80YA9	CNKR2		P17426	AP2A1		O35927	CTND2						Q3USH1	F196A
	P18760	COF1		Q6PAK3	ANM8		P18760	COF1		Q9DBG3	AP2B1		Q5SQX6	CYFP2						P68040	GBLP
	G5E8K5	ANK3		A2ARS0	ANR63		Q9CQF3	CPSF5		P84091	AP2M1		Q62167	DDX3X						P26049	GBRA3
	P70429	EVL		O35643	AP1B1		Q922C1	CS044		Q60875	ARHG2		Q61656	DDX5						P63080	GBRB3
	P60879	SNP25		P22892	AP1G1		Q6P9K8	CSKI1		Q3UTH8	ARHG9		P97427	DPYL1						Q8BUV3	GEPH
	A2AJA9	AJM1		P35585	AP1M1		Q61301	CTNA2		Q9JM76	ARPC3		O08553	DPYL2						Q8K3I9	GLCI1
	G5E829	AT2B1		Q9WVP1	AP1M2		Q02248	CTNB1		Q8VHP9	ASB17		Q9D2N4	DTNA						O70443	GNAZ
	Q9CQV8	1433B		P17426	AP2A1		O35927	CTND2		Q8C0M9	ASGL1		Q9JHU4	DYHC1						Q3U3C9	GSE1
	Q9R111	GUAD		Q9DBG3	AP2B1		Q5SQX6	CYFP2		Q8VDN2	AT1A1		P63168	DYL1						Q2NL51	GSK3A
	P22723	GBRG2		P84091	AP2M1		Q62167	DDX3X		Q6PIC6	AT1A3		Q9D0M5	DYL2						Q640R3	HECAM
	O70585	DTNB		P62743	AP2S1		Q61656	DDX5		P14094	AT1B1		P43006	EAA2						P10630	IF4A2
	P70460	VASP		Q60875	ARHG2		Q9D415	DLGP1		O55143	AT2A2		P10126	EF1A1						Q8CD60	INSY1
	P0DP28	CALM3		Q3UTH8	ARHG9		P63037	DNJA1		G5E829	AT2B1		Q8BFR5	EFTU						Q5DU25	IQEC2
	Q61235	SNTB2		Q9JM76	ARPC3		P97427	DPYL1		Q925I1	ATAD3		P70372	ELAV1						Q3TES0	IQEC3
	P15116	CADH2		Q8C0M9	ASGL1		O08553	DPYL2		Q4QY64	ATAD5		Q03173	ENAH						Q5DTX6	K1462
	Q64332	SYN2		P16460	ASSY		Q9D2N4	DTNA		Q80YN3	BCAS1		P70429	EVL						P05132	KAPCA
	A2AQ25	SKT		Q8VDN2	AT1A1		O70585	DTNB		P20029	BIP		Q9ER35	FN3K						P68181	KAPCB
	P35700	PRDX1		Q6PIC6	AT1A3		Q9JHU4	DYHC1		Q5RJI5	BRSK1		Q3U0V1	FUBP2						Q8BK63	KC1A
	P38647	GRP75		P14094	AT1B1		P63168	DYL1		O88737	BSN		P62880	GBB2						Q5SXA9	KIBRA
	P10639	THIO		Q925I1	ATAD3		Q9D0M5	DYL2		Q8K1A6	C2D1A		P62812	GBRA1						P11627	L1CAM
	Q8BFR5	EFTU		Q3V3N7	BBS1		Q9Z2H5	E41L1		P15116	CADH2		P26048	GBRA2						Q9JIA1	LGI1
	Q9WVQ1	MAGI2		Q9CWF6	BBS2		P43006	EAA2		Q3UHL1	CAMKV		P63080	GBRB3						P63005	LIS1
	Q8CHC4	SYNJ1		Q8C1Z7	BBS4		P10126	EF1A1		Q80VC9	CAMP3		Q8BUV3	GEPH						Q99JY8	LPP3
	P62259	1433E		Q9CZQ9	BBS5		Q8BFR5	EFTU		P47757	CAPZB		P15105	GLNA						Q9EQJ9	MAGI3
	Q8BYM5	NLGN3		Q8K2G4	BBS7		P70372	ELAV1		Q8BME9	CBLN4		Q7TNC8	GLRA2						Q61885	MOG
	P63085	MK01		Q80YN3	BCAS1		Q61701	ELAV4		Q3UHB8	CC177		Q91XP5	GLRA3						Q61879	MYH10
	P17751	TPIS		Q8K019	BCLF1		Q03173	ENAH		Q8VDP4	CCAR2		P48168	GLRB						Q8BH82	NAPEP
	O88737	BSN		Q80XN0	BDH		Q8VDI1	ESIP1		Q8QZT2	CCSAP		P18872	GNAO						Q69ZK9	NLGN2
	P11531	DMD		P20029	BIP		P70429	EVL		Q6A068	CDC5L		O70325	GPX4						P97300	NPTN
	Q9D2N4	DTNA		Q5RJI5	BRSK1		Q9ER35	FN3K		P49615	CDK5		Q60631	GRB2						Q810U4	NRCAM
	P97427	DPYL1		Q69Z98	BRSK2		Q3U0V1	FUBP2		Q3UTQ8	CDKL5		P38647	GRP75						Q99PJ0	NTRI
	Q76MZ3	2AAA		O88737	BSN		P62880	GBB2		Q9CXS4	CENPV		Q9WV60	GSK3B						P70296	PEBP1
	O70456	1433S		Q8R066	C1QT4		P62812	GBRA1		Q9CY57	CHTOP		O35737	HNRH1						O35405	PLD3
	P60335	PCBP1		Q5HZI2	C2C4C		P26048	GBRA2		O08585	CLCA		Q8VEK3	HNRPU						P62962	PROF1
	Q8K4Q8	COL12		Q8K1A6	C2D1A		P63137	GBRB2		Q68FD5	CLH1		Q3V1H3	HPHL1						B0V2N1	PTPRS
	P10637	TAU		P15116	CADH2		P63080	GBRB3		Q8BH59	CMC1		Q61699	HS105						Q91V41	RAB14
	O70325	GPX4		Q3UHL1	CAMKV		Q8BUV3	GEPH		P16330	CN37		P17156	HSP72						P63011	RAB3A
	P68510	1433F		Q8C1B1	CAMP2		P15105	GLNA		Q80YA9	CNKR2		P63017	HSP7C						P62823	RAB3C
	Q99J85	NPTXR		Q80VC9	CAMP3		Q7TNC8	GLRA2		P18760	COF1		Q8CD60	INSY1						Q91ZR1	RAB4B
	Q69ZK9	NLGN2		Q60865	CAPR1		Q91XP5	GLRA3		Q62036	CP131		Q5DU25	IQEC2						Q9CQD1	RAB5A
	P26361	CFTR		P47757	CAPZB		P48168	GLRB		Q812E0	CPEB2		Q3TES0	IQEC3						P61021	RAB5B
	Q91XP5	GLRA3		O54724	CAVN1		P18872	GNAO		Q9CQF3	CPSF5		P11798	KCC2A						P51150	RAB7A
	P14094	AT1B1		P47754	CAZA2		O70325	GPX4		Q8BTV2	CPSF7		P28652	KCC2B						P61226	RAP2B
	P43006	EAA2		Q3UHB8	CC177		Q60631	GRB2		Q922C1	CS044		Q923T9	KCC2G						Q811P8	RHG32
	P61982	1433G		Q8VDP4	CCAR2		P38647	GRP75		Q6P9K8	CSKI1		Q60749	KHDR1						P31648	SC6A1
	Q02248	CTNB1		Q8QZT2	CCSAP		Q9WV60	GSK3B		Q61301	CTNA2		Q9EQJ9	MAGI3						Q99K85	SERC
	P15105	GLNA		Q6A068	CDC5L		P43275	H11		Q02248	CTNB1		P27546	MAP4						Q810B9	SLIK3
	Q61301	CTNA2		P49615	CDK5		P18608	HMGN1		P30999	CTND1		Q7TSJ2	MAP6						Q810B7	SLIK5
	P63080	GBRB3		Q3UTQ8	CDKL5		O35737	HNRH1		O35927	CTND2		Q6PER3	MARE3						Q8R570	SNP47
	P62812	GBRA1		Q6A078	CE290		Q8VEK3	HNRPU		Q5SQX6	CYFP2		P98064	MASP1						Q9ESJ4	SPN90
	P99024	TBB5		Q9Z0H4	CELF2		Q3V1H3	HPHL1		Q9JLM8	DCLK1		P63085	MK01						Q3UUG6	TBC24
	Q61464	ZN638		Q9CXS4	CENPV		Q61699	HS105		Q501J6	DDX17		P20357	MTAP2						Q9Z1A9	TBCD8
	P10126	EF1A1		P63038	CH60		Q61696	HS71A		Q62167	DDX3X		P08551	NFL						P01831	THY1
	P68254	1433T		Q09XV5	CHD8		P17156	HSP72		Q61656	DDX5		P08553	NFM						Q4VAE3	TMM65
	Q8CD60	INSY1		Q8CGZ0	CHERP		P63017	HSP7C		Q7TNV0	DEK		Q69ZK9	NLGN2						Q8BKI2	TNR6B
	P99029	PRDX5		Q9CY57	CHTOP		P01750	HVM06		Q6NS52	DGKB		Q8BYM5	NLGN3						Q8C7M3	TRIM9
	P63101	1433Z		Q8BRT1	CLAP2		P01799	HVM30		P51660	DHB4		Q9QYX7	PCLO						P62838	UB2D2
	Q61699	HS105		O08585	CLCA		Q8BXL9	IFFO1		P70175	DLG3		Q9WUA3	PFKAP						Q9R0P9	UCHL1
	Q8VDQ8	SIR2		Q6IRU5	CLCB		Q9CXY6	ILF2		P97427	DPYL1		Q9QUR7	PIN1						Q60932	VDAC1
	Q9JJV2	PROF2		Q68FD5	CLH1		Q8CD60	INSY1		O08553	DPYL2		P63330	PP2AA						P59016	VP33B
	Q91XV3	BASP1		Q8BH59	CMC1		Q5DU25	IQEC2		Q9D2N4	DTNA		P63328	PP2BA						Q9QZ88	VPS29
	Q9D6F9	TBB4A		P16330	CN37		Q3TES0	IQEC3		O70585	DTNB		P35700	PRDX1						Q8VEJ9	VPS4A
	Q3UTH8	ARHG9		Q80YA9	CNKR2		P11798	KCC2A		Q9JHU4	DYHC1		P99029	PRDX5						Q6NXJ0	WWC2
	O08573	LEG9		P18760	COF1		P28652	KCC2B		P63168	DYL1		Q9JJV2	PROF2						P39447	ZO1
	P20029	BIP		Q8R3I3	COG6		Q923T9	KCC2G		Q9D0M5	DYL2		Q811P8	RHG32
	Q5DU25	IQEC2		Q8BH44	COR2B		Q60749	KHDR1		P39053	DYN1		Q5SSM3	RHG44
	Q7TNC8	GLRA2		Q62036	CP131		P01631	KV2A7		Q8C008	DZAN1		Q8BP67	RL24
	Q3USH1	INSY2		Q812E0	CPEB2		P01660	KV3A8		Q9Z2H5	E41L1		Q91VM5	RMXL1
	Q62191	RO52		O35218	CPSF2		P01638	KV5A6		O70318	E41L2		P62301	RS13
	P48168	GLRB		Q9CQF3	CPSF5		Q9JJK2	LANC2		Q9WV92	E41L3		P25444	RS2
	Q9D0M5	DYL2		Q8BTV2	CPSF7		O08573	LEG9		P43006	EAA2		P62908	RS3
	P28652	KCC2B		Q922C1	CS044		Q9WVQ1	MAGI2		P10126	EF1A1		D3YXK2	SAFB1
	Q3U0V1	FUBP2		Q60737	CSK21		Q9EQJ9	MAGI3		Q8BFR5	EFTU		Q9Z2Q6	SEPT5
	P05213	TBA1B		O54833	CSK22		P27546	MAP4		P70372	ELAV1		Q8CHH9	SEPT8
	Q922C1	CS044		P67871	CSK2B		Q7TSJ2	MAP6		Q05BC3	EMAL1		Q8VDQ8	SIR2
	Q811P8	RHG32		Q6P9K8	CSKI1		Q6PER3	MARE3		Q7TNG5	EMAL2		A2AQ25	SKT
	P11798	KCC2A		Q61301	CTNA2		P98064	MASP1		Q03173	ENAH		Q61235	SNTB2
	P63017	HSP7C		Q02248	CTNB1		P63085	MK01		P70429	EVL		Q9QWI6	SRCN1
	Q03173	ENAH		P30999	CTND1		P20357	MTAP2		Q6A0A9	F120A		Q8CHC4	SYNJ1
	P63168	DYL1		O35927	CTND2		P08551	NFL		Q8BH61	F13A		Q8CC35	SYNPO
	Q3TES0	IQEC3		Q5SQX6	CYFP2		P08553	NFM		Q9QVP9	FAK2		P10637	TAU
	P01670	KV3AI		Q80U19	DAAM2		Q69ZK9	NLGN2		Q80WS3	FBLL1		P05213	TBA1B
	P01868	IGHG1		Q91VR5	DDX1		Q8BYM5	NLGN3		P26151	FCGR1		Q7TMM9	TBB2A
	Q8BUV3	GEPH		Q501J6	DDX17		Q99J85	NPTXR		Q9ER35	FN3K		Q9ERD7	TBB3
				Q9CWT6	DDX28		Q61990	PCBP2		Q3U0V1	FUBP2		Q9D6F9	TBB4A
				Q62167	DDX3X		Q9QYX7	PCLO		P16858	G3P		P68372	TBB4B
				Q61656	DDX5		Q9WUA3	PFKAP		P62880	GBB2		P99024	TBB5
				P54823	DDX6		Q9QUR7	PIN1		P62812	GBRA1		P80316	TCPE
				Q6NS52	DGKB		P63330	PP2AA		P26048	GBRA2		P17751	TPIS
				O35286	DHX15		P63328	PP2BA		P63137	GBRB2		Q7TQD2	TPPP
				Q99PU8	DHX30		P48453	PP2BB		P63080	GBRB3		Q8C0D0	TRUB1
				O70133	DHX9		P35700	PRDX1		Q921G8	GCP2		Q8C8T8	TSR2
				Q9ESX5	DKC1		P99029	PRDX5		P58854	GCP3		P70460	VASP
				Q811D0	DLG1		Q9JJV2	PROF2		Q8BUV3	GEPH
				P63037	DNJA1		Q811P8	RHG32		P03995	GFAP
				O54946	DNJB6		Q5SSM3	RHG44		P15105	GLNA
				P97427	DPYL1		Q8BP67	RL24		Q7TNC8	GLRA2
				O08553	DPYL2		Q91VM5	RMXL1		Q91XP5	GLRA3
				Q9QXS6	DREB		Q5XPI3	RN123		P48168	GLRB
				Q9D2N4	DTNA		P62301	RS13		P18872	GNAO
				Q9Z1N5	DX39B		P25444	RS2		P62881	GNB5
				Q9JHU4	DYHC1		P62908	RS3		Q8C419	GP158
				P63168	DYL1		D3YXK2	SAFB1		Q64521	GPDM
				Q9D0M5	DYL2		Q9Z2Q6	SEPT5		O70325	GPX4
				P39053	DYN1		Q9R1T4	SEPT6		Q60631	GRB2
				O70318	E41L2		O55131	SEPT7		P38647	GRP75
				Q9WV92	E41L3		Q8CHH9	SEPT8		Q9WV60	GSK3B
				P43006	EAA2		Q8VDQ8	SIR2		Q9R111	GUAD
				Q3UJB9	EDC4		A2AQ25	SKT		P15864	H12
				P10126	EF1A1		Q61235	SNTB2		Q9QZQ8	H2AY
				Q9D8N0	EF1G		Q9QWI6	SRCN1		P70288	HDAC2
				P58252	EF2		P84104	SRSF3		Q9Z130	HNRDL
				Q8BFR5	EFTU		Q8CHC4	SYNJ1		O35737	HNRH1
				P70372	ELAV1		Q8CC35	SYNPO		P70333	HNRH2
				Q60899	ELAV2		P10637	TAU		Q00PI9	HNRL2
				Q61701	ELAV4		P05213	TBA1B		P61979	HNRPK
				Q03173	ENAH		Q7TMM9	TBB2A		Q8R081	HNRPL
				P17182	ENOA		Q9ERD7	TBB3		Q9D0E1	HNRPM
				Q6PH08	ERC2		Q9D6F9	TBB4A		Q7TMK9	HNRPQ
				P84089	ERH		P68372	TBB4B		Q8VEK3	HNRPU
				P70429	EVL		P99024	TBB5		Q3TEA8	HP1B3
				Q6A0A9	F120A		P80316	TCPE		Q3V1H3	HPHL1
				Q8C3F2	F120C		Q8BYI9	TENR		Q61699	HS105
				Q80VD1	FA98B		P17751	TPIS		P48722	HS74L
				Q9QVP9	FAK2		Q7TQD2	TPPP		P17156	HSP72
				Q80WS3	FBLL1		Q8C0D0	TRUB1		P63017	HSP7C
				P35550	FBRL		Q8C8T8	TSR2		Q8CD60	INSY1
				P26151	FCGR1		P70460	VASP		Q5DU25	IQEC2
				Q9D824	FIP1		Q8R5H6	WASF1		Q3TES0	IQEC3
				P35922	FMR1		Q61464	ZN638		P11798	KCC2A
				Q9ER35	FN3K					P28652	KCC2B
				Q80TY0	FNBP1					Q923T9	KCC2G
				P09528	FRIH					Q60749	KHDR1
				Q3U0V1	FUBP2					P28740	KIF2A
				P56959	FUS					O89112	LANC1
				Q61584	FXR1					P16125	LDHB
				P97855	G3BP1					P14733	LMNB1
				P97379	G3BP2					A2AHG0	LZTS3
				P16858	G3P					Q9CR62	M2OM
				P62880	GBB2					Q14BB9	MA6D1
				P62812	GBRA1					Q6NS57	MABP1
				P26048	GBRA2					Q9WVQ1	MAGI2
				P63080	GBRB3					Q9EQJ9	MAGI3
				P22723	GBRG2					P27546	MAP4
				Q921G8	GCP2					Q7TSJ2	MAP6
				P58854	GCP3					O88735	MAP7
				Q9D4F8	GCP4					Q6PER3	MARE3
				Q8BKN5	GCP5					Q8VHJ5	MARK1
				G5E8P0	GCP6					Q05512	MARK2
				Q8BUV3	GEPH					P98064	MASP1
				P03995	GFAP					P04370	MBP
				Q9D6M3	GHC1					Q9Z2D6	MECP2
				P15105	GLNA					P63085	MK01
				Q7TNC8	GLRA2					Q99KX1	MLF2
				Q91XP5	GLRA3					Q9CQV6	MLP3B
				P48168	GLRB					P20357	MTAP2
				D3Z7P3	GLSK					Q61879	MYH10
				P18872	GNAO					Q8VDD5	MYH9
				P62881	GNB5					Q60605	MYL6
				Q64521	GPDM					Q99104	MYO5A
				O70325	GPX4					P60202	MYPR
				Q60631	GRB2					P28660	NCKP1
				Q9Z1S3	GRP1					Q99KK2	NEUA
				P38647	GRP75					P60761	NEUG
				Q9WV60	GSK3B					P19246	NFH
				Q9R111	GUAD					P08551	NFL
				P43275	H11					P08553	NFM
				P15864	H12					Q69ZK9	NLGN2
				P43277	H13					Q8BYM5	NLGN3
				P43274	H14					Q9D6Z1	NOP56
				P43276	H15					Q99J85	NPTXR
				Q8R1M2	H2AJ					P46460	NSF
				Q3THW5	H2AV					O08919	NUMBL
				Q8CCK0	H2AW					P35486	ODPA
				Q9QZQ8	H2AY					P29341	PABP1
				Q6ZWY9	H2B1C					P60335	PCBP1
				Q9JKS5	HABP4					Q9QYX7	PCLO
				P22315	HEMH					Q8BG81	PDIP3
				P18608	HMGN1					P12382	PFKAL
				Q9Z130	HNRDL					P47857	PFKAM
				O35737	HNRH1					Q9WUA3	PFKAP
				P70333	HNRH2					P23506	PIMT
				Q00PI9	HNRL2					Q9QUR7	PIN1
				Q9Z204	HNRPC					Q68FH0	PKP4
				Q60668	HNRPD					P62141	PP1B
				Q9Z2X1	HNRPF					P63330	PP2AA
				P61979	HNRPK					P63328	PP2BA
				Q8R081	HNRPL					P35700	PRDX1
				Q9D0E1	HNRPM					P99029	PRDX5
				Q7TMK9	HNRPQ					Q9JJV2	PROF2
				Q8VEK3	HNRPU					P42669	PURA
				Q3V1H3	HPHL1					O35295	PURB
				Q61699	HS105					Q64012	RALY
				Q61696	HS71A					Q5SFM8	RBM27
				P48722	HS74L					Q8BK67	RCC2
				P11499	HS90B					Q811P8	RHG32
				P17156	HSP72					Q5SSM3	RHG44
				P63017	HSP7C					Q6ZWV3	RL10
				Q9R118	HTRA1					P53026	RL10A
				Q9Z0N1	IF2G					P35979	RL12
				P60843	IF4A1					Q9CPR4	RL17
				Q91VC3	IF4A3					P62717	RL18A
				Q8BGD9	IF4B					P62830	RL23
				P63073	IF4E					Q8BP67	RL24
				Q9CXY6	ILF2					P61358	RL27
				Q8CD60	INSY1					P27659	RL3
				Q8BP00	IQCB1					P62911	RL32
				Q5DU25	IQEC2					P61514	RL37A
				Q3TES0	IQEC3					P47911	RL6
				Q9Z0R4	ITSN1					P14148	RL7
				P52332	JAK1					P12970	RL7A
				Q80TK0	K1107					Q91VM5	RMXL1
				Q8BK63	KC1A					Q9CX86	ROA0
				P11798	KCC2A					P49312	ROA1
				P28652	KCC2B					Q8BG05	ROA3
				Q923T9	KCC2G					P47708	RP3A
				Q60749	KHDR1					Q8BKF1	RPOM
				Q9R226	KHDR3					P62281	RS11
				P28740	KIF2A					P62301	RS13
				P28738	KIF5C					P62270	RS18
				P63318	KPCG					P25444	RS2
				P52480	KPYM					P62983	RS27A
				P01631	KV2A7					P62908	RS3
				P01638	KV5A6					P97351	RS3A
				O89112	LANC1					P62702	RS4X
				Q9JJK2	LANC2					P97461	RS5
				P48678	LMNA					Q6ZWN5	RS9
				P14733	LMNB1					Q9CQE8	RTRAF
				Q8K2F8	LS14A					D3YXK2	SAFB1
				Q80WJ7	LYRIC					Q8K2B3	SDHA
				A2AHG0	LZTS3					Q9CQA3	SDHB
				Q9CR62	M2OM					Q9Z2Q6	SEPT5
				Q14BB9	MA6D1					Q8CHH9	SEPT8
				A2AJI0	MA7D1					Q8VIJ6	SFPQ
				Q9EQJ9	MAGI3					Q8VDQ8	SIR2
				Q8BP48	MAP11					A2AQ25	SKT
				Q9QYR6	MAP1A					Q9CW03	SMC3
				P14873	MAP1B					Q6DIC0	SMCA2
				P27546	MAP4					Q6PDG5	SMRC2
				Q7TSJ2	MAP6					Q61235	SNTB2
				O88735	MAP7					Q62261	SPTB2
				Q3TRR0	MAP9					P16546	SPTN1
				Q6PER3	MARE3					Q62417	SRBS1
				Q8VHJ5	MARK1					Q9QWI6	SRCN1
				Q05512	MARK2					Q9JIS5	SV2A
				Q03141	MARK3					F6SEU4	SYGP1
				P98064	MASP1					O88935	SYN1
				Q8K310	MATR3					Q64332	SYN2
				P04370	MBP					Q8CHC4	SYNJ1
				Q9Z2D6	MECP2					Q8CC35	SYNPO
				P63085	MK01					Q921F2	TADBP
				Q3THE2	ML12B					A2A690	TANC2
				Q99KX1	MLF2					P10637	TAU
				Q69ZX6	MOR2A					P05213	TBA1B
				Q8CE90	MP2K7					P68368	TBA4A
				Q8VEM8	MPCP					Q7TMM9	TBB2A
				P20357	MTAP2					Q9ERD7	TBB3
				Q6ZPE2	MTMR5					Q9D6F9	TBB4A
				Q8C854	MYEF2					P68372	TBB4B
				Q61879	MYH10					P99024	TBB5
				Q8VDD5	MYH9					P83887	TBG1
				Q60605	MYL6					P80316	TCPE
				Q99104	MYO5A					P80318	TCPG
				P60202	MYPR					P42932	TCPQ
				Q9CQ25	MZT2					P80317	TCPZ
				Q8CH77	NAV1					P40630	TFAM
				P28660	NCKP1					P10639	THIO
				Q91W39	NCOA5					P01831	THY1
				Q9QXL8	NDK7					P17751	TPIS
				Q62425	NDUA4					Q7TQD2	TPPP
				Q99KK2	NEUA					Q6PFR5	TRA2A
				P60761	NEUG					Q9ESN6	TRIM2
				P19246	NFH					Q9R1R2	TRIM3
				P08551	NFL					Q8C7M3	TRIM9
				P08553	NFM					Q8C0D0	TRUB1
				Q69ZK9	NLGN2					Q61037	TSC2
				Q8BYM5	NLGN3					Q8C8T8	TSR2
				Q9D6Z1	NOP56					Q9D6E4	TTC9B
				P46460	NSF					P25976	UBF1
				E9Q7G0	NUMA1					Q9R0P9	UCHL1
				O08919	NUMBL					Q99KD5	UN45A
				P35486	ODPA					P70460	VASP
				P29341	PABP1					P57746	VATD
				P60335	PCBP1					Q8R5H6	WASF1
				Q61990	PCBP2					Q8CGF6	WDR47
				Q9QYX7	PCLO					Q8BJH1	ZC21A
				Q8BG81	PDIP3
				Q8BFP9	PDK1
				Q922H2	PDK3
				P12382	PFKAL
				P47857	PFKAM
				Q9WUA3	PFKAP
				Q8BX10	PGAM5
				O70161	PI51C
				Q9QUR7	PIN1
				Q6ZPQ6	PITM2
				Q68FH0	PKP4
				Q9QXS1	PLEC
				P62141	PP1B
				P63330	PP2AA
				P63328	PP2BA
				P48453	PP2BB
				Q7TPM1	PRC2B
				Q3TLH4	PRC2C
				P35700	PRDX1
				P99029	PRDX5
				Q9JJV2	PROF2
				Q99KP6	PRP19
				Q9D7G0	PRPS1
				Q99JF8	PSIP1
				Q811G0	PTHB1
				P63089	PTN
				P42669	PURA
				O35295	PURB
				Q9Z210	PX11B
				Q64012	RALY
				P62827	RAN
				Q60972	RBBP4
				Q8VH51	RBM39
				Q9WV02	RBMX
				Q9EPU0	RENT1
				Q811P8	RHG32
				Q5SSM3	RHG44
				Q80U40	RIMB2
				Q6ZWV3	RL10
				P53026	RL10A
				Q9CXW4	RL11
				P35979	RL12
				P47963	RL13
				P19253	RL13A
				Q9CR57	RL14
				Q9CZM2	RL15
				Q9CPR4	RL17
				P35980	RL18
				P62717	RL18A
				P84099	RL19
				O09167	RL21
				P62830	RL23
				P62751	RL23A
				Q8BP67	RL24
				P61255	RL26
				P61358	RL27
				P14115	RL27A
				P41105	RL28
				P47915	RL29
				P27659	RL3
				P62889	RL30
				P62900	RL31
				P62911	RL32
				Q9D1R9	RL34
				Q6ZWV7	RL35
				O55142	RL35A
				P47964	RL36
				P83882	RL36A
				P61514	RL37A
				Q9D8E6	RL4
				P47911	RL6
				P14148	RL7
				P12970	RL7A
				P62918	RL8
				P51410	RL9
				P14869	RLA0
				P99027	RLA2
				Q8K2Y7	RM47
				Q91VM5	RMXL1
				Q62191	RO52
				Q9CX86	ROA0
				P49312	ROA1
				Q8BG05	ROA3
				P47708	RP3A
				Q8BKF1	RPOM
				P63325	RS10
				P62281	RS11
				P63323	RS12
				P62301	RS13
				P62264	RS14
				P62843	RS15
				P62245	RS15A
				P14131	RS16
				P63276	RS17
				P62270	RS18
				Q9CZX8	RS19
				P25444	RS2
				P60867	RS20
				P62267	RS23
				P62849	RS24
				P62852	RS25
				P62855	RS26
				Q6ZWU9	RS27
				P62983	RS27A
				P62858	RS28
				P62908	RS3
				P97351	RS3A
				P62702	RS4X
				P97461	RS5
				P62754	RS6
				P62082	RS7
				P62242	RS8
				Q6ZWN5	RS9
				Q9JIK9	RT34
				Q99LF4	RTCB
				Q9CQE8	RTRAF
				P60122	RUVB1
				Q9WTM5	RUVB2
				D3YXK2	SAFB1
				Q8K2B3	SDHA
				Q9CQA3	SDHB
				Q8C1B7	SEP11
				Q9Z2Q6	SEPT5
				Q9R1T4	SEPT6
				Q8CHH9	SEPT8
				Q8K4Z5	SF3A1
				Q99NB9	SF3B1
				Q921M3	SF3B3
				Q8VIJ6	SFPQ
				Q8VDQ8	SIR2
				A2AQ25	SKT
				Q8CH25	SLTM
				Q9CU62	SMC1A
				Q6DIC0	SMCA2
				P62320	SMD3
				Q6PDG5	SMRC2
				Q3UKJ7	SMU1
				Q61235	SNTB2
				Q8K1N4	SPAS2
				Q62261	SPTB2
				P16546	SPTN1
				Q6NV83	SR140
				Q9QWI6	SRCN1
				O54781	SRPK2
				P84104	SRSF3
				O35326	SRSF5
				O08599	STXB1
				Q9JIS5	SV2A
				F6SEU4	SYGP1
				Q64332	SYN2
				Q8BP47	SYNC
				Q8CHC4	SYNJ1
				Q8CC35	SYNPO
				Q921F2	TADBP
				Q6ZQ29	TAOK2
				P10637	TAU
				P05213	TBA1B
				P68373	TBA1C
				P68368	TBA4A
				Q7TMM9	TBB2A
				Q9CWF2	TBB2B
				Q9ERD7	TBB3
				Q9D6F9	TBB4A
				P68372	TBB4B
				P99024	TBB5
				P83887	TBG1
				P11983	TCPA
				P80315	TCPD
				P80316	TCPE
				P80318	TCPG
				P42932	TCPQ
				P80317	TCPZ
				P40630	TFAM
				P10639	THIO
				O08583	THOC4
				P01831	THY1
				Q9JKK7	TMOD2
				Q04750	TOP1
				Q64511	TOP2B
				P17751	TPIS
				Q7TQD2	TPPP
				Q569Z6	TR150
				Q8C006	TRI35
				Q7TNM2	TRI46
				Q9R1R2	TRIM3
				Q8C7M3	TRIM9
				Q8C0D0	TRUB1
				Q8C8T8	TSR2
				Q8VD72	TTC8
				Q9D6E4	TTC9B
				Q8JZU2	TXTP
				Q9D883	U2AF1
				Q6P4T2	U520
				O08810	U5S1
				Q8VDW4	UBE2W
				P52479	UBP10
				P70460	VASP
				P62814	VATB2
				P57746	VATD
				Q9WTT4	VATG2
				Q9D2N9	VP33A
				Q9Z1G4	VPP1
				Q920Q4	VPS16
				Q8R307	VPS18
				Q5KU39	VPS41
				Q91V09	WDR13
				Q3UGF1	WDR19
				Q8K4P0	WDR33
				Q8CGF6	WDR47
				Q920I9	WDR7
				Q8BJH1	ZC21A
				O88532	ZFR
				Q61624	ZN148
				Q61464	ZN638

## Sheet: Panel E
	Panel E: Interaction network of 120 interactors identified by all DARPin based pulldowns
	Uniprot ID	Protein name	Description	Ensembl ID	Gene Name	Ontology name		Average abundance rel. Gephyrin	Uezu 2016 Interactor	Canonical interactor	3B11 Interactor
	P68510	1433F	tyrosine 3-monooxygenase/tryptophan 5-monooxygenase activation protein, eta polypeptide [Source:MGI Symbol;Acc:MGI:109194]	ENSMUSG00000018965	Ywhah	Signalling scaffold		0.66027			1
	P61982	1433G	tyrosine 3-monooxygenase/tryptophan 5-monooxygenase activation protein, gamma polypeptide [Source:MGI Symbol;Acc:MGI:108109]	ENSMUSG00000051391	Ywhag	Signalling scaffold		0.686997			1
	O70456	1433S	stratifin [Source:MGI Symbol;Acc:MGI:1891831]	ENSMUSG00000047281	Sfn	Signalling scaffold		0.665107			1
	P68254	1433T	tyrosine 3-monooxygenase/tryptophan 5-monooxygenase activation protein theta [Source:MGI Symbol;Acc:MGI:891963]	ENSMUSG00000076432	Ywhaq	Signalling scaffold		0.723137			1
	Q6P1F6	2ABA	protein phosphatase 2, regulatory subunit B, alpha [Source:MGI Symbol;Acc:MGI:1919228]	ENSMUSG00000022052	Ppp2r2a	Phosphorylation regulation		0.638468
	Q7TPR4	ACTN1	actinin, alpha 1 [Source:MGI Symbol;Acc:MGI:2137706]	ENSMUSG00000015143	Actn1	Cytoskeletal protein and adaptors		0.602546
	Q3UHD9	AGAP2	ArfGAP with GTPase domain, ankyrin repeat and PH domain 2 [Source:MGI Symbol;Acc:MGI:3580016]	ENSMUSG00000025422	Agap2	Signalling scaffold		0.609889
	P46660	AINX	internexin neuronal intermediate filament protein, alpha [Source:MGI Symbol;Acc:MGI:96568]	ENSMUSG00000034336	Ina	Cytoskeletal protein and adaptors		0.743071
	A2AJA9	AJM1	apical junction component 1 [Source:MGI Symbol;Acc:MGI:2685842]	ENSMUSG00000029419	Ajm1	Synaptic adhesion		0.646675			1
	Q8C8R3	ANK2	ankyrin 2, brain [Source:MGI Symbol;Acc:MGI:88025]	ENSMUSG00000032826	Ank2	Signalling scaffold		0.674073
	P17426	AP2A1	adaptor-related protein complex 2, alpha 1 subunit [Source:MGI Symbol;Acc:MGI:101921]	ENSMUSG00000060279	Ap2a1	Cytoskeletal protein and adaptors		0.763676
	Q3UTH8	ARHG9	CDC42 guanine nucleotide exchange factor (GEF) 9 [Source:MGI Symbol;Acc:MGI:2442233]	ENSMUSG00000025656	Arhgef9	Signalling scaffold		0.739233	1	1	1
	Q9JM76	ARPC3	actin related protein 2/3 complex, subunit 3 [Source:MGI Symbol;Acc:MGI:1928375]	ENSMUSG00000029465	Arpc3	Cytoskeletal protein and adaptors		0.590652
	Q8C0M9	ASGL1	asparaginase like 1 [Source:MGI Symbol;Acc:MGI:1913764]	ENSMUSG00000024654	Asrgl1	Metabolism		0.596476	1
	Q80YN3	BCAS1	brain enriched myelin associated protein 1 [Source:MGI Symbol;Acc:MGI:1924210]	ENSMUSG00000013523	Bcas1	Other		0.681725
	P20029	BIP	heat shock protein 5 [Source:MGI Symbol;Acc:MGI:95835]	ENSMUSG00000026864	Hspa5	Structure and trafficking		0.73784			1
	O88737	BSN	bassoon [Source:MGI Symbol;Acc:MGI:1277955]	ENSMUSG00000032589	Bsn	Signalling scaffold		0.699186			1
	P15116	CADH2	cadherin 2 [Source:MGI Symbol;Acc:MGI:88355]	ENSMUSG00000024304	Cdh2	Synaptic adhesion		0.657012			1
	Q3UHL1	CAMKV	CaM kinase-like vesicle-associated [Source:MGI Symbol;Acc:MGI:2384296]	ENSMUSG00000032936	Camkv	Phosphorylation regulation		0.661919
	P16330	CN37	2',3'-cyclic nucleotide 3' phosphodiesterase [Source:MGI Symbol;Acc:MGI:88437]	ENSMUSG00000006782	Cnp	Metabolism		0.747657
	Q80YA9	CNKR2	connector enhancer of kinase suppressor of Ras 2 [Source:MGI Symbol;Acc:MGI:2661175]	ENSMUSG00000025658	Cnksr2	Signalling scaffold		0.610709			1
	P18760	COF1	cofilin 1, non-muscle [Source:MGI Symbol;Acc:MGI:101757]	ENSMUSG00000056201	Cfl1	Cytoskeletal protein and adaptors		0.625563			1
	Q9CQF3	CPSF5	nudix (nucleoside diphosphate linked moiety X)-type motif 21 [Source:MGI Symbol;Acc:MGI:1915469]	ENSMUSG00000031754	Nudt21	mRNA regulation		0.643414
	Q922C1	CS044	RIKEN cDNA 1700030K09 gene [Source:MGI Symbol;Acc:MGI:1919504]	ENSMUSG00000052794	1700030K09Rik	Other		0.760809			1
	Q6P9K8	CSKI1	CASK interacting protein 1 [Source:MGI Symbol;Acc:MGI:2442952]	ENSMUSG00000033597	Caskin1	Signalling scaffold		0.609475
	Q61301	CTNA2	catenin (cadherin associated protein), alpha 2 [Source:MGI Symbol;Acc:MGI:88275]	ENSMUSG00000063063	Ctnna2	Synaptic adhesion		0.679064			1
	Q02248	CTNB1	catenin (cadherin associated protein), beta 1 [Source:MGI Symbol;Acc:MGI:88276]	ENSMUSG00000006932	Ctnnb1	Synaptic adhesion		0.676842			1
	O35927	CTND2	Catenin delta-2	None	Ctnnd2	Synaptic adhesion		0.624906			1
	Q5SQX6	CYFP2	cytoplasmic FMR1 interacting protein 2 [Source:MGI Symbol;Acc:MGI:1924134]	ENSMUSG00000020340	Cyfip2	Cytoskeletal protein and adaptors		0.658958
	Q62167	DDX3X	DEAD box helicase 3, X-linked [Source:MGI Symbol;Acc:MGI:103064]	ENSMUSG00000000787	Ddx3x	mRNA regulation		0.693699
	Q61656	DDX5	Probable ATP-dependent RNA helicase DDX5	None	Ddx5	mRNA regulation		0.778786
	P97427	DPYL1	collapsin response mediator protein 1 [Source:MGI Symbol;Acc:MGI:107793]	ENSMUSG00000029121	Crmp1	Cytoskeletal protein and adaptors		0.618693			1
	O08553	DPYL2	dihydropyrimidinase-like 2 [Source:MGI Symbol;Acc:MGI:1349763]	ENSMUSG00000022048	Dpysl2	Cytoskeletal protein and adaptors		0.744408
	Q9D2N4	DTNA	dystrobrevin alpha [Source:MGI Symbol;Acc:MGI:106039]	ENSMUSG00000024302	Dtna	Synaptic adhesion		0.645419	1	1	1
	Q9JHU4	DYHC1	dynein cytoplasmic 1 heavy chain 1 [Source:MGI Symbol;Acc:MGI:103147]	ENSMUSG00000018707	Dync1h1	Cytoskeletal protein and adaptors		0.599777			1
	P63168	DYL1	dynein light chain LC8-type 1 [Source:MGI Symbol;Acc:MGI:1861457]	ENSMUSG00000009013	Dynll1	Cytoskeletal protein and adaptors		0.838102	1	1	1
	Q9D0M5	DYL2	dynein light chain LC8-type 2 [Source:MGI Symbol;Acc:MGI:1915347]	ENSMUSG00000020483	Dynll2	Cytoskeletal protein and adaptors		0.765149	1	1	1
	P43006	EAA2	solute carrier family 1 (glial high affinity glutamate transporter), member 2 [Source:MGI Symbol;Acc:MGI:101931]	ENSMUSG00000005089	Slc1a2	Ion channels and transport		0.675885			1
	P10126	EF1A1	eukaryotic translation elongation factor 1 alpha 1 [Source:MGI Symbol;Acc:MGI:1096881]	ENSMUSG00000037742	Eef1a1	mRNA regulation		0.733373			1
	Q8BFR5	EFTU	Tu translation elongation factor, mitochondrial [Source:MGI Symbol;Acc:MGI:1923686]	ENSMUSG00000073838	Tufm	mRNA regulation		0.63372			1
	P70372	ELAV1	ELAV (embryonic lethal, abnormal vision)-like 1 (Hu antigen R) [Source:MGI Symbol;Acc:MGI:1100851]	ENSMUSG00000040028	Elavl1	mRNA regulation		0.675949
	Q03173	ENAH	ENAH actin regulator [Source:MGI Symbol;Acc:MGI:108360]	ENSMUSG00000022995	Enah	Cytoskeletal protein and adaptors		0.831614	1	1	1
	P70429	EVL	Ena-vasodilator stimulated phosphoprotein [Source:MGI Symbol;Acc:MGI:1194884]	ENSMUSG00000021262	Evl	Cytoskeletal protein and adaptors		0.602014	1	1	1
	Q9ER35	FN3K	fructosamine 3 kinase [Source:MGI Symbol;Acc:MGI:1926834]	ENSMUSG00000025175	Fn3k	Metabolism		0.599361
	Q3U0V1	FUBP2	KH-type splicing regulatory protein [Source:MGI Symbol;Acc:MGI:1336214]	ENSMUSG00000007670	Khsrp	mRNA regulation		0.767793			1
	P62880	GBB2	guanine nucleotide binding protein (G protein), beta 2 [Source:MGI Symbol;Acc:MGI:95784]	ENSMUSG00000029713	Gnb2	Other		0.621385
	P62812	GBRA1	gamma-aminobutyric acid (GABA) A receptor, subunit alpha 1 [Source:MGI Symbol;Acc:MGI:95613]	ENSMUSG00000010803	Gabra1	Ion channels and transport		0.688277		1	1
	P26048	GBRA2	gamma-aminobutyric acid (GABA) A receptor, subunit alpha 2 [Source:MGI Symbol;Acc:MGI:95614]	ENSMUSG00000000560	Gabra2	Ion channels and transport		0.588638		1	1
	P63080	GBRB3	gamma-aminobutyric acid (GABA) A receptor, subunit beta 3 [Source:MGI Symbol;Acc:MGI:95621]	ENSMUSG00000033676	Gabrb3	Ion channels and transport		0.680111	1	1	1
	Q8BUV3	GEPH	gephyrin [Source:MGI Symbol;Acc:MGI:109602]	ENSMUSG00000047454	Gphn	Signalling scaffold		1	1	1	1
	P15105	GLNA	glutamate-ammonia ligase (glutamine synthetase) [Source:MGI Symbol;Acc:MGI:95739]	ENSMUSG00000026473	Glul	Metabolism		0.708304			1
	Q7TNC8	GLRA2	glycine receptor, alpha 2 subunit [Source:MGI Symbol;Acc:MGI:95748]	ENSMUSG00000018589	Glra2	Ion channels and transport		0.716605			1
	Q91XP5	GLRA3	glycine receptor, alpha 3 subunit [Source:MGI Symbol;Acc:MGI:95749]	ENSMUSG00000038257	Glra3	Ion channels and transport		0.635522			1
	P48168	GLRB	glycine receptor, beta subunit [Source:MGI Symbol;Acc:MGI:95751]	ENSMUSG00000028020	Glrb	Ion channels and transport		0.736706		1	1
	P18872	GNAO	guanine nucleotide binding protein, alpha O [Source:MGI Symbol;Acc:MGI:95775]	ENSMUSG00000031748	Gnao1	Other		0.661091
	O70325	GPX4	glutathione peroxidase 4 [Source:MGI Symbol;Acc:MGI:104767]	ENSMUSG00000075706	Gpx4	Metabolism		0.659577			1
	Q60631	GRB2	growth factor receptor bound protein 2 [Source:MGI Symbol;Acc:MGI:95805]	ENSMUSG00000059923	Grb2	Signalling scaffold		0.584511
	P38647	GRP75	heat shock protein 9 [Source:MGI Symbol;Acc:MGI:96245]	ENSMUSG00000024359	Hspa9	Structure and trafficking		0.632937			1
	Q9WV60	GSK3B	glycogen synthase kinase 3 beta [Source:MGI Symbol;Acc:MGI:1861437]	ENSMUSG00000022812	Gsk3b	Phosphorylation regulation		0.646548
	O35737	HNRH1	heterogeneous nuclear ribonucleoprotein H1 [Source:MGI Symbol;Acc:MGI:1891925]	ENSMUSG00000007850	Hnrnph1	mRNA regulation		0.739456
	Q8VEK3	HNRPU	heterogeneous nuclear ribonucleoprotein U [Source:MGI Symbol;Acc:MGI:1858195]	ENSMUSG00000039630	Hnrnpu	mRNA regulation		0.812114
	Q3V1H3	HPHL1	hephaestin-like 1 [Source:MGI Symbol;Acc:MGI:2685355]	ENSMUSG00000031936	Hephl1	Metabolism		0.704479
	Q61699	HS105	heat shock 105kDa/110kDa protein 1 [Source:MGI Symbol;Acc:MGI:105053]	ENSMUSG00000029657	Hsph1	Structure and trafficking		0.697781			1
	P17156	HSP72	heat shock protein 2 [Source:MGI Symbol;Acc:MGI:96243]	ENSMUSG00000059970	Hspa2	Structure and trafficking		0.588746
	P63017	HSP7C	heat shock protein 8 [Source:MGI Symbol;Acc:MGI:105384]	ENSMUSG00000015656	Hspa8	Structure and trafficking		0.811169			1
	Q8CD60	INSY1	inhibitory synaptic factor 1 [Source:MGI Symbol;Acc:MGI:2442108]	ENSMUSG00000066607	Insyn1	Synaptic adhesion		0.682748	1	1	1
	Q5DU25	IQEC2	IQ motif and SEC7 domain-containing protein 2	None	Iqsec2	Signalling scaffold		0.699185	1		1
	Q3TES0	IQEC3	IQ motif and Sec7 domain 3 [Source:MGI Symbol;Acc:MGI:2677208]	ENSMUSG00000040797	Iqsec3	Signalling scaffold		0.861697	1	1	1
	P11798	KCC2A	calcium/calmodulin-dependent protein kinase II alpha [Source:MGI Symbol;Acc:MGI:88256]	ENSMUSG00000024617	Camk2a	Phosphorylation regulation		0.821468			1
	P28652	KCC2B	calcium/calmodulin-dependent protein kinase II, beta [Source:MGI Symbol;Acc:MGI:88257]	ENSMUSG00000057897	Camk2b	Phosphorylation regulation		0.750888			1
	Q923T9	KCC2G	calcium/calmodulin-dependent protein kinase II gamma [Source:MGI Symbol;Acc:MGI:88259]	ENSMUSG00000021820	Camk2g	Phosphorylation regulation		0.628733
	Q60749	KHDR1	KH domain containing, RNA binding, signal transduction associated 1 [Source:MGI Symbol;Acc:MGI:893579]	ENSMUSG00000028790	Khdrbs1	mRNA regulation		0.689185
	Q9EQJ9	MAGI3	membrane associated guanylate kinase, WW and PDZ domain containing 3 [Source:MGI Symbol;Acc:MGI:1923484]	ENSMUSG00000052539	Magi3	Signalling scaffold		0.683889	1
	P27546	MAP4	microtubule-associated protein 4 [Source:MGI Symbol;Acc:MGI:97178]	ENSMUSG00000032479	Map4	Cytoskeletal protein and adaptors		0.701869
	Q7TSJ2	MAP6	microtubule-associated protein 6 [Source:MGI Symbol;Acc:MGI:1201690]	ENSMUSG00000055407	Map6	Cytoskeletal protein and adaptors		0.780885
	Q6PER3	MARE3	microtubule-associated protein, RP/EB family, member 3 [Source:MGI Symbol;Acc:MGI:2140967]	ENSMUSG00000029166	Mapre3	Cytoskeletal protein and adaptors		0.569722			1
	P98064	MASP1	mannan-binding lectin serine peptidase 1 [Source:MGI Symbol;Acc:MGI:88492]	ENSMUSG00000022887	Masp1	Other		0.700911
	P63085	MK01	mitogen-activated protein kinase 1 [Source:MGI Symbol;Acc:MGI:1346858]	ENSMUSG00000063358	Mapk1	Phosphorylation regulation		0.657105			1
	P20357	MTAP2	microtubule-associated protein 2 [Source:MGI Symbol;Acc:MGI:97175]	ENSMUSG00000015222	Map2	Cytoskeletal protein and adaptors		0.730547
	P08551	NFL	neurofilament, light polypeptide [Source:MGI Symbol;Acc:MGI:97313]	ENSMUSG00000022055	Nefl	Cytoskeletal protein and adaptors		0.703706
	P08553	NFM	Neurofilament medium polypeptide	None	Nefm	Cytoskeletal protein and adaptors		0.687994
	Q69ZK9	NLGN2	neuroligin 2 [Source:MGI Symbol;Acc:MGI:2681835]	ENSMUSG00000051790	Nlgn2	Synaptic adhesion		0.678332	1	1	1
	Q8BYM5	NLGN3	neuroligin 3 [Source:MGI Symbol;Acc:MGI:2444609]	ENSMUSG00000031302	Nlgn3	Synaptic adhesion		0.644127			1
	Q9QYX7	PCLO	piccolo (presynaptic cytomatrix protein) [Source:MGI Symbol;Acc:MGI:1349390]	ENSMUSG00000061601	Pclo	Signalling scaffold		0.63178
	Q9WUA3	PFKAP	phosphofructokinase, platelet [Source:MGI Symbol;Acc:MGI:1891833]	ENSMUSG00000021196	Pfkp	Metabolism		0.696834
	Q9QUR7	PIN1	protein (peptidyl-prolyl cis/trans isomerase) NIMA-interacting 1 [Source:MGI Symbol;Acc:MGI:1346036]	ENSMUSG00000032171	Pin1	Structure and trafficking		0.625573		1	1
	P63330	PP2AA	protein phosphatase 2 (formerly 2A), catalytic subunit, alpha isoform [Source:MGI Symbol;Acc:MGI:1321159]	ENSMUSG00000020349	Ppp2ca	Phosphorylation regulation		0.608591
	P63328	PP2BA	protein phosphatase 3, catalytic subunit, alpha isoform [Source:MGI Symbol;Acc:MGI:107164]	ENSMUSG00000028161	Ppp3ca	Phosphorylation regulation		0.68587
	P35700	PRDX1	peroxiredoxin 1 [Source:MGI Symbol;Acc:MGI:99523]	ENSMUSG00000028691	Prdx1	Metabolism		0.628197			1
	P99029	PRDX5	peroxiredoxin 5 [Source:MGI Symbol;Acc:MGI:1859821]	ENSMUSG00000024953	Prdx5	Metabolism		0.672643			1
	Q9JJV2	PROF2	profilin 2 [Source:MGI Symbol;Acc:MGI:97550]	ENSMUSG00000027805	Pfn2	Cytoskeletal protein and adaptors		0.72782			1
	Q811P8	RHG32	Rho GTPase activating protein 32 [Source:MGI Symbol;Acc:MGI:2450166]	ENSMUSG00000041444	Arhgap32	Structure and trafficking		0.827766	1	1	1
	Q5SSM3	RHG44	Rho GTPase activating protein 44 [Source:MGI Symbol;Acc:MGI:2144423]	ENSMUSG00000033389	Arhgap44	Signalling scaffold		0.537513			1
	Q8BP67	RL24	ribosomal protein L24 [Source:MGI Symbol;Acc:MGI:1915443]	ENSMUSG00000098274	Rpl24	Ribosome		0.633916
	Q91VM5	RMXL1	RNA binding motif protein, X-linked like-1 [Source:MGI Symbol;Acc:MGI:1343045]	ENSMUSG00000037070	Rbmxl1	mRNA regulation		0.753276
	P62301	RS13	ribosomal protein S13 [Source:MGI Symbol;Acc:MGI:1915302]	ENSMUSG00000090862	Rps13	Ribosome		0.769739
	P25444	RS2	ribosomal protein S2 [Source:MGI Symbol;Acc:MGI:105110]	ENSMUSG00000044533	Rps2	Ribosome		0.739095
	P62908	RS3	ribosomal protein S3 [Source:MGI Symbol;Acc:MGI:1350917]	ENSMUSG00000030744	Rps3	Ribosome		0.72094
	D3YXK2	SAFB1	scaffold attachment factor B [Source:MGI Symbol;Acc:MGI:2146974]	ENSMUSG00000071054	Safb	Other		0.660578
	Q9Z2Q6	SEPT5	septin 5 [Source:MGI Symbol;Acc:MGI:1195461]	ENSMUSG00000072214	Septin5	Cytoskeletal protein and adaptors		0.634943			1
	Q8CHH9	SEPT8	septin 8 [Source:MGI Symbol;Acc:MGI:894310]	ENSMUSG00000018398	Septin8	Other		0.573854
	Q8VDQ8	SIR2	sirtuin 2 [Source:MGI Symbol;Acc:MGI:1927664]	ENSMUSG00000015149	Sirt2	Other		0.686852			1
	A2AQ25	SKT	enhancer trap locus 4 [Source:MGI Symbol;Acc:MGI:95454]	ENSMUSG00000036617	Etl4	Other		0.654557			1
	Q61235	SNTB2	syntrophin, basic 2 [Source:MGI Symbol;Acc:MGI:101771]	ENSMUSG00000041308	Sntb2	Synaptic adhesion		0.615201			1
	Q9QWI6	SRCN1	SRC kinase signaling inhibitor 1	None	Srcin1	Phosphorylation regulation		0.762514
	Q8CHC4	SYNJ1	Synaptojanin-1	None	Synj1	Phosphorylation regulation		0.633548			1
	Q8CC35	SYNPO	synaptopodin [Source:MGI Symbol;Acc:MGI:1099446]	ENSMUSG00000043079	Synpo	Cytoskeletal protein and adaptors		0.666717
	P10637	TAU	microtubule-associated protein tau [Source:MGI Symbol;Acc:MGI:97180]	ENSMUSG00000018411	Mapt	Cytoskeletal protein and adaptors		0.666458			1
	P05213	TBA1B	tubulin, alpha 1B [Source:MGI Symbol;Acc:MGI:107804]	ENSMUSG00000023004	Tuba1b	Cytoskeletal protein and adaptors		0.77098			1
	Q7TMM9	TBB2A	tubulin, beta 2A class IIA [Source:MGI Symbol;Acc:MGI:107861]	ENSMUSG00000058672	Tubb2a	Cytoskeletal protein and adaptors		0.798303
	Q9ERD7	TBB3	tubulin, beta 3 class III [Source:MGI Symbol;Acc:MGI:107813]	ENSMUSG00000062380	Tubb3	Cytoskeletal protein and adaptors		0.731093
	Q9D6F9	TBB4A	tubulin, beta 4A class IVA [Source:MGI Symbol;Acc:MGI:107848]	ENSMUSG00000062591	Tubb4a	Cytoskeletal protein and adaptors		0.730883			1
	P68372	TBB4B	tubulin, beta 4B class IVB [Source:MGI Symbol;Acc:MGI:1915472]	ENSMUSG00000036752	Tubb4b	Cytoskeletal protein and adaptors		0.850922
	P99024	TBB5	tubulin, beta 5 class I [Source:MGI Symbol;Acc:MGI:107812]	ENSMUSG00000001525	Tubb5	Cytoskeletal protein and adaptors		0.733887			1
	P80316	TCPE	chaperonin containing Tcp1, subunit 5 (epsilon) [Source:MGI Symbol;Acc:MGI:107185]	ENSMUSG00000022234	Cct5	Structure and trafficking		0.570004
	P17751	TPIS	triosephosphate isomerase 1 [Source:MGI Symbol;Acc:MGI:98797]	ENSMUSG00000023456	Tpi1	Metabolism		0.655625			1
	Q7TQD2	TPPP	tubulin polymerization promoting protein [Source:MGI Symbol;Acc:MGI:1920198]	ENSMUSG00000021573	Tppp	Cytoskeletal protein and adaptors		0.647663
	Q8C0D0	TRUB1	TruB pseudouridine (psi) synthase family member 1 [Source:MGI Symbol;Acc:MGI:1919383]	ENSMUSG00000025086	Trub1	Metabolism		0.632282
	Q8C8T8	TSR2	Pre-rRNA-processing protein TSR2 homolog	None	Tsr2	mRNA regulation		0.57519
	P70460	VASP	vasodilator-stimulated phosphoprotein [Source:MGI Symbol;Acc:MGI:109268]	ENSMUSG00000030403	Vasp	Cytoskeletal protein and adaptors		0.600522			1
