# Supplementary material for: A DARPin-based molecular toolset to probe gephyrin and inhibitory synapse biology
Source: eLife journal article supplement (doi:10.7554/elife.80895), 2022-10-31
Supplement: supp [file elife-80895-supp-v1.zip › elife_poa_e80895_Figure_5_source_data_3.xlsx]

## Sheet: Panel A
	Figure 5 - Supplement 2 - Panel A: Interactor enrichment plots
	Plots indicating proteins identified as enriched (as oppose to present only) in the binder condition.
	Antibody 3B11							DARPin hFc 27B3							DARPin hFc 27F3							DARPin hFc 27G2
			Adj p values							Adj p values							Adj p values							Adj p values
	Protein	Log2 FC	Adj p < 0.05, log 2 FC > 2.5	Adj p > 0.05	Canonical interactor			Protein	Log2 FC	Adj p < 0.05, log 2 FC > 2.5	Adj p > 0.05	Canonical interactor			Protein	Log2 FC	Adj p < 0.05, log 2 FC > 2.5	Adj p > 0.05	Canonical interactor			Protein	Log2 FC	Adj p < 0.05, log 2 FC > 2.5	Adj p > 0.05	Canonical interactor
	GEPH	14.7665	3.01e-05					THOC4	11.2916	3.1e-05					DYL1	10.0437	0.000589					CCAR2	16.7474	5.92e-07
	IQEC3	11.9361	2.77e-05					AP1B1	11.263	5.65e-06					DYL2	9.44552	0.000654					DYL1	10.8889	0.000171
	RHG32	11.4865	2.77e-05					CCAR2	11.1321	3.62e-06					GEPH	8.88024	0.000589					DYL2	9.57078	0.000239
	DYL2	9.81119	6.69e-05					PDIP3	11.0251	3.52e-05					PROF2	8.09528	0.000971					GEPH	9.49507	0.000142
	ENAH	8.76191	0.000577					RS2	10.7462	3.23e-06					HS105	7.7648	0.000985					PROF2	9.22572	0.000206
	ARHG9	8.51971	0.000577					DDX5	10.6861	1e-05					SEPT7	6.71783	0.010359					TRIM2	8.89194	0.000325
	DYL1	8.44391	2.77e-05					AP1G1	10.661	3.75e-05					PRDX5	5.9691	0.00277					HS105	8.80432	0.000246
	HS105	7.6514	0.000788					DYL1	10.6476	3.91e-05					KCC2A	5.85305	0.000402					TRIM3	8.36549	0.000389
	BIP	7.17872	0.000978					ERH	10.5485	3.23e-06					EF1A1	5.53756	0.000191					PDIP3	8.34089	0.000431
	ZN638	6.8432	0.000964					CH60	10.4754	3.81e-05					GSK3B	5.4844	0.004233					PCBP1	8.31804	0.000439
	RO52	6.80454	3.01e-05					CE290	10.3736	4.43e-05					KCC2B	5.40411	0.000191					RS4X	7.82384	9.85e-05
	KV3AI	5.92248	3.01e-05					DYL2	10.3391	6.25e-05					MTAP2	5.04235	0.000971					ADT1	7.77173	0.000206
	PRDX5	5.78154	0.002164					MLF2	9.96836	6.25e-05					2ABA	4.93233	0.004982					ADT2	7.57051	0.000121
	PROF2	5.74037	0.007493					RS18	9.59928	2.12e-05					CAMKV	4.79807	0.012394					KCC2A	7.29629	6.86e-05
	CTNB1	5.19742	0.000906					DDX3X	9.51972	0.00054					TBB5	4.65592	0.005684					RS2	7.15542	9.85e-05
	BSN	5.10642	0.003087					AP2A2	9.2897	7.67e-05					TBB3	4.64661	0.000571					KCC2B	7.14947	6.86e-05
	GPX4	4.98618	0.006839					RL7	9.09981	3.23e-06					ELAV1	4.60743	0.011495					PRDX5	6.80575	0.001237
	MK01	4.91686	0.021					GEPH	9.02113	8.09e-05					AINX	4.48508	0.004233					AINX	6.77177	0.000246
	2AAA	4.81677	0.025667					ADT2	8.96275	1.44e-05					HSP7C	4.31601	0.000402					GSK3B	6.65619	0.001359
	1433E	4.44373	0.003833					SFPQ	8.96204	5.97e-05					HNRH1	4.29478	0.002754					HNRH1	6.3323	0.000121
	AT1B1	4.40232	0.000977					ERC2	8.93337	7.66e-05					1433T	4.11921	0.007001					CTNB1	6.22089	0.001428
	1433T	4.36662	0.001069					PROF2	8.93246	6.85e-05					SEP11	4.10755	0.020791					TBB3	6.21278	0.000246
	EAA2	4.31438	0.008672					RL6	8.84099	6.25e-05					1433G	3.90441	0.000589					SRCN1	6.18129	0.00014
	CTNA2	4.19988	0.003487					PURB	8.71277	6.25e-05					DDX5	3.82354	0.002829					DDX3X	6.11224	0.004171
	TAU	4.16193	0.0026					RL17	8.6813	7.44e-05					TBA1B	3.73833	0.000985					MTAP2	6.05063	0.00014
	1433F	4.02818	0.001756					TBB3	8.53018	3.23e-06					SYNPO	3.73611	0.002829					RS18	5.9825	0.000171
	LEG9	4.00719	0.000978					RS8	8.52314	8.05e-05					NFM	3.6316	0.002829					GLNA	5.95707	0.005116
	GLNA	3.86578	0.001108					RL10	8.5034	0.000205					NFL	3.62993	0.008076					SYNPO	5.86367	0.000385
	2ABA	3.83641	0.010542					AP2A1	8.4253	1.9e-05					SRCN1	3.60153	0.003146					DDX5	5.76413	0.000229
	GRP75	3.7992	0.00361					AP2S1	8.34755	4.11e-05					RMXL1	3.48554	0.018347					NFL	5.74437	0.000439
	BASP1	3.79557	0.041952					HS105	8.326	0.000269					DDX3X	3.48267	0.047384					CAMKV	5.66002	0.004434
	PRDX1	3.72788	0.011712					RS6	8.27865	0.000102					CN37	3.46955	0.001624					ZC21A	5.59577	0.007527
	TBA1B	3.64236	0.000977					CAMKV	8.16789	0.000102					ESIP1	3.46247	0.002754					HNRH2	5.52516	0.001675
	GUAD	3.44958	0.014167					HNRPU	8.14198	4.43e-05					1433F	3.45615	0.001853					1433F	5.4586	9.85e-05
	KCC2B	3.28258	0.000964					RMXL1	7.8817	8.31e-05					EAA2	3.37906	0.003					1433G	5.33507	0.000142
	TBB5	3.22478	0.013819					ADT1	7.74799	4.43e-05					TBB4B	3.34847	0.000971					AT2B1	5.3299	0.005858
	NCKP1	3.19275	0.001682					PCBP1	7.70305	0.000195					MAP6	3.32831	0.001853					EAA2	5.30483	0.000239
	TPIS	3.19239	0.012558					RL27	7.70011	0.000141					TBB4A	3.30891	0.002829					ANK2	5.28099	0.000239
	1433Z	3.17243	0.009312					AINX	7.61705	8.62e-05					PP2BA	3.30699	0.002572					E41L3	5.27927	0.000523
	SYN2	3.16621	0.032372					KCC2A	7.5693	1e-05					PCBP2	3.19408	0.002963					1433T	5.17621	0.000439
	IGHG1	3.1583	0.000577					RS4X	7.55534	1.9e-05					GLNA	3.18705	0.024556					NFM	5.07809	0.000325
	KCC2A	3.14189	0.000964					PURA	7.40674	8.62e-05					STX1B	3.16588	0.036838					RS13	5.03007	0.000189
	COF1	3.12652	0.008027					AP2B1	7.35536	3.99e-05					TBB2A	3.15725	0.001132					TBB2A	5.02468	0.000171
	EFTU	3.08961	0.030767					RL28	7.2856	0.000117					KHDR1	3.14555	0.042861					MAP6	4.99587	0.000171
	HSP7C	3.02411	0.000964					GSK3B	7.28183	0.000108					H11	3.14005	0.029307					CN37	4.97955	0.000171
	PCBP1	2.93093	0.013278					ELAV1	7.2697	0.000269					DPYL2	3.08792	0.001132					AP2A2	4.95715	0.005592
	NSF	2.90133	0.014167					SRCN1	7.25805	1.44e-05					SAFB1	3.08437	0.039462					HSP7C	4.91467	0.00014
	SYNJ1	2.89734	0.008115					TBB5	7.23276	1.79e-05					AP2A1	3.0362	0.018347					TBA1B	4.908	0.000183
	HS90B	2.8308	0.021468					KHDR1	7.15762	0.00041					ANK2	3.01998	0.004982					ACTS	4.87798	0.017378
	K1107	2.80354	0.024962					RS16	7.15017	1.44e-05					CTNB1	2.99966	0.035827					NDUA4	4.78985	0.008149
	PIN1	2.79748	0.01535					RS13	7.01996	1e-05					MAP4	2.96396	0.00526					TBB4B	4.77656	0.000171
	1433G	2.76227	0.003778					KCC2B	6.96315	5.65e-06					RS26	2.84702	0.044463					ELAV1	4.73243	0.00471
	HES1	2.74995	0.003398					HNRH1	6.94868	1.79e-05					TPIS	2.81178	0.021809					2ABA	4.72059	0.043314
	SKT	2.68325	0.003778					RL13	6.92194	0.000208					RS2	2.63274	0.004396					ROA1	4.71685	0.002442
	TBB4A	2.62262	0.00232					PFKAM	6.88289	0.00032					SRSF3	2.60599	0.018519					TBB5	4.68584	0.003414
	EF1A1	2.60713	0.001434					PI51C	6.87571	2.34e-05					GNAO	2.55462	0.004982					DYN1	4.68038	0.005858
	CALM3	2.53882	0.038327					NFL	6.77914	7e-05					HNRPU	2.54169	0.03969					RS26	4.65627	0.012389
	LAMB2	-2.53163	0.010385					AP2M1	6.72319	6.85e-05					KV5A1	-1.70726	0.025645					EF1A1	4.57757	0.000325
	PGBM	-2.64236	0.00334					MYO5A	6.57757	8.05e-05					HVM06	-1.90585	0.036977					MAP4	4.57597	0.000171
	KV5AF	-2.68803	0.004097					RL27A	6.55603	5.65e-06					HVM36	-1.9402	0.042008					KHDR1	4.54246	0.005592
	ACINU	-2.68848	0.01188					RL23	6.46861	0.001595					KV3A8	-1.94027	0.018948					RL27A	4.4541	0.00369
	RL15	-2.69133	0.002212					RL37A	6.43875	0.000301					HVM30	-1.95551	0.018283					PP2BA	4.4503	0.000171
	RL11	-2.73356	0.002164					CN37	6.34543	1.44e-05					KV5A6	-2.17786	0.030249					TPIS	4.38039	0.001698
	SF3B3	-2.73903	0.004448					PRDX5	6.33846	0.000208					TENR	-2.37573	0.00355					GHC1	4.37463	0.011402
	RS15A	-2.76206	0.026384					MTAP2	6.32463	7e-05					KV2A6	-2.4036	0.039996					RBBP4	4.3363	0.009629
	PRP19	-2.83622	0.007786					TRIM3	6.27075	0.000141					RS13	-2.87192	0.003826					DPYL2	4.32991	0.000183
	RL13	-2.87068	0.001774					GFAP	6.23834	0.002521					ANK3	-3.69711	0.004106					AP2A1	4.30316	0.00102
	RS13	-2.89891	0.0026					HNRPQ	6.15176	0.000294					KV2A7	-3.79766	0.029224					RP3A	4.25531	0.008977
	TOP1	-2.90477	0.04331					EF2	6.14138	0.000229					CO1A1	-5.51101	0.011497					DCLK1	4.23975	0.03534
	RLA2	-2.92608	0.002817					TBB2A	6.13709	1e-05					NEUG	2.44152		0.009022				RMXL1	4.16211	0.003724
	TOP2B	-2.9617	0.009374					2ABA	6.09743	0.000205					TOP2B	2.40898		0.029224				SMCA2	4.10696	0.011323
	RL21	-3.00158	0.004448					HS90B	6.028	0.000156					SMRC2	2.3734		0.019164				STXB1	4.07084	0.02554
	RL35	-3.02075	0.000977					SYNPO	5.9419	3.87e-05					AP1B1	2.28394		0.042861				PURB	4.06835	0.007527
	LAMC1	-3.05371	0.003157					PRP19	5.93613	0.000925					SYN2	2.24517		0.012394				MYH10	4.06486	0.005116
	RL24	-3.06059	0.003328					SF3B3	5.90492	0.000233					H2AW	2.21615		0.016739				RL27	4.05469	0.004672
	RL8	-3.07814	0.017015					GHC1	5.89418	0.003971					NSF	2.2134		0.008375				TBB4A	4.00848	0.000439
	RL36A	-3.13878	0.01188					RL31	5.89324	0.000116					E41L3	2.19285		0.047384				RL17	3.92081	0.022699
	PURB	-3.16332	0.003778					TBB4B	5.87876	9.29e-06					1433Z	2.1351		0.026638				RL6	3.91172	0.032911
	CDC5L	-3.19388	0.008672					MYH10	5.86127	0.000334					HNRPD	2.06796		0.042595				TFAM	3.69475	0.002836
	RS12	-3.26304	0.008672					HNRH2	5.85324	0.000179					G3P	2.02612		0.004982				CLH1	3.66194	0.001311
	RL29	-3.26817	0.001576					SAFB1	5.84338	8.97e-05					DHX9	2.01441		0.028545				G3P	3.65626	0.000358
	RL31	-3.30599	0.010385					ANK2	5.81739	8.32e-05					TBA4A	1.91449		0.019439				ACTB	3.62934	0.000289
	RL28	-3.32643	0.006819					NFM	5.81368	2.39e-05					ACTB	1.89942		0.007324				RL37A	3.6165	0.040704
	RL7	-3.32772	0.001119					ELAV2	5.81015	0.000714					HNRPK	1.89281		0.039462				NEUG	3.58856	0.000445
	RL13A	-3.36201	0.003328					TBA1B	5.77471	1.44e-05					HDGR3	1.80488		0.035893				MLF2	3.57569	0.014772
	KV5A2	-3.38519	0.007139					TBB4A	5.7562	1.44e-05					ROA2	1.77385		0.037478				HNRPM	3.56683	0.003275
	BTBDH	-3.42331	0.011451					GLNA	5.74088	0.00041					PKP4	1.74753		0.039495				HNRPU	3.49949	0.005738
	MA7D1	-3.49555	0.004845					RL23A	5.72888	0.000205					ERH	1.70154		0.029224				1433E	3.49684	0.007528
	RL12	-3.5146	0.000577					FBRL	5.7125	8.27e-05					H13	1.68518		0.022994				AP1B1	3.48782	0.006243
	RS16	-3.51606	0.003487					NDUA4	5.71056	4.11e-05					SPTN1	1.64416		0.04932				AT1A1	3.47893	0.003642
	RL30	-3.52115	0.013907					STXB1	5.70482	9.2e-05					CLH1	1.53319		0.031148				SMRC2	3.45702	0.001008
	NUCL	-3.5245	0.04636					1433T	5.64924	7.67e-05					RL7	1.49901		0.026505				1433Z	3.4454	0.002006
	RS9	-3.54811	0.000977					1433F	5.60856	1e-05					H2AJ	1.48214		0.029224				CAPZB	3.40798	0.008581
	BRSK1	-3.62369	0.04871					MAP6	5.53641	1.79e-05					MBP	1.21771		0.048942				TBA4A	3.40595	0.00156
	RL18	-3.63788	0.006584					RS26	5.51788	0.00047					IGG2B	-1.35803		0.042595				PI51C	3.38377	0.026761
	RL4	-3.75429	0.000559					CLH1	5.46143	2.12e-05					KV5AC	-1.42121		0.038398				MYO5A	3.3623	0.012857
	RL10A	-3.76341	0.001733					1433G	5.42858	1.36e-05					IGHG1	-1.52095		0.020762				LMNB1	3.35492	0.003859
	RS4X	-3.78506	0.000977					EF1A1	5.2199	6.11e-05					HVM57	-1.53606		0.030578				AT1B1	3.34178	0.010732
	RL18A	-3.79059	0.000559					E41L3	5.2111	0.000161					MECP2	1.92814		0.052753				AP2B1	3.3394	0.003326
	THOC4	-3.83425	0.026384					HNRPM	5.2006	7e-05					RL6	2.48036		0.052753				PKP4	3.31319	0.003419
	RL34	-3.85337	0.003487					EAA2	5.14428	0.000208					ROA3	2.08589		0.053057				RL7	3.30037	0.000829
	RL35A	-3.8919	0.001684					HSP7C	5.07242	1.44e-05					DKC1	1.50063		0.053057				GFAP	3.2938	0.035857
	RS14	-3.90837	0.003968					RLA0	5.02616	0.000363					NOP58	2.01547		0.053057				RL23	3.28623	0.009629
	RS2	-3.91373	0.001022					PP2BA	5.02016	1e-05					SHAN2	1.2943		0.053433				ELAV2	3.28351	0.02281
	RL14	-3.92355	0.000577					SMCA2	5.00797	0.000774					RL27A	1.3491		0.054443				PFKAM	3.23513	0.019485
	HVM13	-3.96585	0.027889					AT1B1	4.92598	0.000123					KV6AA	-1.24576		0.055346				MYH9	3.22625	0.007545
	ARHG2	-3.98711	0.014968					DYN1	4.88359	0.000278					LMNB1	2.06599		0.056469				GNAO	3.20574	0.00362
	RL10	-3.99512	0.000563					MBP	4.86114	1.44e-05					THY1	2.03965		0.057767				MLP3B	3.1714	0.022019
	RL17	-4.02283	0.004448					ROA1	4.83698	0.001273					IGKC	-1.12588		0.059448				MECP2	3.15373	0.008551
	LA	-4.05528	0.018374					RL35	4.7687	0.000102					PAK1	2.11043		0.05967				AP2M1	3.12736	0.005116
	RL7A	-4.06899	0.002817					MYH9	4.74662	0.000864					AT1B1	1.79725		0.05978				H2AY	3.1174	0.00796
	AGRIN	-4.108	0.002164					DPYL2	4.72166	1.79e-05					LV1A	-2.53642		0.062214				NSF	3.10534	0.003059
	RS3A	-4.14503	0.004916					CTNB1	4.71537	0.000764					KV5A3	-1.20645		0.062827				SYN2	3.10161	0.010299
	RS6	-4.25628	0.000964					ZC21A	4.65709	0.000481					AT1A3	1.25795		0.062827				PURA	3.09991	0.013905
	HVM21	-4.36481	0.009276					PCBP2	4.64654	0.000123					KV5A7	-1.22787		0.064608				ROA3	3.05598	0.003258
	RS19	-4.49247	0.002767					HNRPK	4.62605	4.43e-05					H15	1.5824		0.065924				RS27A	3.03985	0.007302
	RS18	-4.51592	0.000577					TFAM	4.61235	0.000358					DMD	2.01599		0.06615				MYL6	3.03251	0.017549
	RS25	-4.54658	0.000964					TPIS	4.60685	0.000272					TRIM3	-3.36341		0.067341				HNRL2	3.02149	0.010032
	RS5	-4.5618	0.002932					MYL6	4.54643	0.001374					H2AV	1.24459		0.067685				HNRPK	2.98556	0.001311
	RL23A	-4.61587	0.000977					SRSF3	4.54403	0.000301					H14	1.90877		0.067991				MBP	2.9376	0.002574
	CAPR1	-4.96769	0.002284					DREB	4.52911	0.000746					PCBP1	4.3327		0.068104				RALY	2.93218	0.009218
	F120A	-5.01886	0.000577					NSF	4.52882	3.52e-05					SPTB2	1.62747		0.068104				MYPR	2.92326	0.012541
	PABP1	-5.10855	0.00029					RAB6A	4.51445	0.002438					RL23	2.29389		0.068244				THY1	2.86278	0.013009
	RS3	-5.20628	0.000977					TBA4A	4.49182	7.92e-05					HNRPM	2.33857		0.068811				HNRPQ	2.84617	0.024576
	RL19	-5.26583	0.000189					HNRPL	4.46494	1.79e-05					MATR3	1.50037		0.069579				HNRPL	2.83216	0.001311
	ELAV2	-5.27571	0.000577					HNRL2	4.45396	0.000571					KHDR3	1.5278		0.071118				CENPV	2.82723	0.010732
	RS24	-5.40102	0.001021					1433E	4.45392	0.001522					UCHL1	2.21967		0.072358				H12	2.82011	0.003883
	RL27	-5.4216	0.00168					MECP2	4.43021	0.000659					FBRL	2.24777		0.073191				SPTB2	2.81381	0.003275
	RL26	-5.68597	0.00168					GNAO	4.36216	4.43e-05					HNRPL	1.33018		0.074373				UCHL1	2.80092	0.026182
	G3BP2	-6.33719	0.000221					RS11	4.35496	2.34e-05					LAC1	-3.36583		0.077234				SYN1	2.79151	0.021979
	HVM56	-6.53646	0.000634					H11	4.29137	0.002047					RS18	1.78431		0.077234				SPTN1	2.7888	0.005952
	TENR	-7.31591	0.000964					DHX9	4.26976	0.000197					MYH10	2.31808		0.078375				LDHB	2.7884	0.029445
	PP2BA	2.48092		0.002817				MYEF2	4.26055	0.001331					SUCA	1.26675		0.078375				RS11	2.77204	0.001522
	ACON	2.47886		0.043854				STX1B	4.24901	0.002773					CS1A	0.988407		0.078375				STX1B	2.76255	0.014897
	DLGP1	2.4164		0.02714				MAP4	4.24778	2.85e-05					CENPV	1.8024		0.078835				HP1B3	2.761	0.040704
	MAGI3	2.32046		0.003077				TMOD2	4.24122	8.05e-05					GHC1	1.65106		0.078885				KV5AA	2.7302	0.019941
	RAB14	2.29646		0.041027				SEP11	4.22937	0.001872					KV6A5	-1.00859		0.078885				KHDR3	2.71299	0.026018
	TBB2A	2.29155		0.002164				ROA3	4.22784	8.86e-05					LMNB2	1.62393		0.079568				NOP56	2.66761	0.002006
	E41L3	2.25362		0.010114				SMRC2	4.15204	0.000272					H2B1C	1.33299		0.082692				ROA0	2.66205	0.006294
	NEUM	2.24958		0.01188				NOP58	4.10308	0.003558					IGHG3	-0.9925		0.082692				RL10	2.64571	0.033754
	HBB1	2.19754		0.04636				RBBP4	4.09566	8.27e-05					NOP56	1.8115		0.082692				FBLL1	2.64076	0.020122
	TPPP	2.1456		0.005134				RS27A	4.09453	0.000395					HNRL2	2.00865		0.08287				SAFB1	2.59146	0.015004
	DPYL2	2.10396		0.004995				ROA0	4.05543	8.27e-05					ACTS	3.5015		0.083491				AP2S1	2.57579	0.013778
	TBA4A	2.06866		0.003776				HNRPD	4.03972	0.000174					H10	1.06171		0.083491				SFPQ	2.57009	0.031884
	AT1A3	2.06597		0.02939				GLYR1	3.95454	0.004675					GRN	1.28469		0.084566				DEK	2.52584	0.009858
	MTAP2	2.00818		0.012558				ACTB	3.91837	2.85e-05					ROA1	2.82958		0.084566				AT1A3	2.50544	0.010032
	TBB4B	1.83712		0.009234				G3P	3.88505	2.85e-05					H12	1.28235		0.087959				ACL6B	2.50027	0.005116
	CLCA	1.77523		0.022444				SPTB2	3.86204	0.000116					MLF2	2.23333		0.089255				CO1A1	-4.26202	0.009858
	BCAS1	1.76835		0.008672				RP3A	3.82847	0.000151					AP2B1	1.87856		0.094354				LUZP1	-6.57901	0.003064
	PLAK	1.76099		0.041869				H2AW	3.80804	0.001385					RS27A	1.43514		0.094354				DHX9	2.49213		0.005116
	IGKC	1.72055		0.004448				RALY	3.78656	0.000156					RP3A	1.37357		0.094354				DMD	2.46378		0.0234
	G3P	1.69139		0.008919				SYN2	3.78205	0.000205					ROA0	2.04187		0.094354				GBB1	2.46097		0.025382
	SRCN1	1.59428		0.02072				NOP56	3.74849	6.85e-05					AT2B1	2.35024		0.095083				MATR3	2.45955		0.003776
	PFKAP	1.48821		0.019453				CAPZB	3.7265	0.001432					RL35	-1.35102		0.095083				H2AV	2.43943		0.006933
	CYFP2	1.35629		0.029906				KHDR3	3.63127	0.000126					IGHM	1.62563		0.097922				H2AW	2.42353		0.018498
	IGG2B	-1.09774		0.026191				ACON	3.57478	0.000354					PTN	1.65938		0.10673				PARP1	2.27813		0.024458
	KV4A1	-1.12432		0.03852				SPTN1	3.55415	0.000399					H2AY	1.60008		0.108776				HNRPD	2.26296		0.017378
	HNRPU	-1.13348		0.029767				1433Z	3.55311	8.05e-05					RS23	1.196		0.109567				H15	2.25449		0.007528
	HNRL2	-1.1425		0.043659				ACL6B	3.54374	0.00017					MAP1A	1.2147		0.109567				H2AJ	2.25225		0.006933
	FBRL	-1.21588		0.043933				H12	3.54208	7.44e-05					RBP17	-1.61235		0.109567				ATPB	2.22154		0.046804
	KV5A6	-1.237		0.024815				MATR3	3.46749	8.62e-05					DESP	2.00277		0.109877				PSIP1	2.21576		0.005116
	DDX5	-1.24364		0.026619				TOP2B	3.44095	0.000196					RL27	2.07771		0.111219				ROA2	2.20511		0.015004
	EI2BD	-1.26389		0.018628				ENOA	3.38654	0.001268					NO40	-0.95916		0.112768				MAP1B	2.18107		0.005858
	AP2B1	-1.28652		0.04636				DKC1	3.35964	0.000363					RALY	1.72934		0.113918				MAP1A	2.16517		0.006294
	VIME	-1.32941		0.035047				LMNB1	3.35069	0.001298					MYO5A	1.47938		0.114971				H14	2.12948		0.024458
	CENPV	-1.3476		0.018628				MYPR	3.27243	0.00019					KV5A4	-0.94427		0.114971				CLAP2	2.07885		0.007887
	HVM60	-1.35448		0.035805				AT1A1	3.27161	0.001337					C1RA	0.973071		0.12026				HNRPC	2.05366		0.022896
	SMRC2	-1.35553		0.024711				HDGR3	3.26083	0.003442					ACL6B	1.24725		0.123526				H2B1C	2.00709		0.009858
	KV2A7	-1.40274		0.010625				ROA2	3.24787	0.000304					FBLL1	1.63167		0.125119				TOP1	1.96979		0.020033
	HNRPD	-1.45492		0.016136				FBLL1	3.22748	0.001175					TFAM	1.87553		0.125834				RS16	1.9647		0.043314
	SAFB1	-1.45627		0.049041				PKP4	3.18769	0.000971					MYEF2	1.65786		0.130811				H13	1.94194		0.020114
	KVM5	-1.49955		0.022715				H2AY	3.17778	0.003625					ADT2	1.84781		0.132219				H2B3B	1.93191		0.00572
	KV5AC	-1.54145		0.008115				NUMA1	3.16061	0.003378					ADT1	1.65043		0.132219				H4	1.90278		0.023264
	PDCD6	-1.57242		0.022123				NEUG	3.13456	0.000121					KV3AE	-1.36805		0.132219				IGHG1	1.82275		0.009629
	NOP58	-1.57483		0.009234				CLAP2	3.12648	0.000102					KV4A1	-1.0043		0.132219				LMNA	1.79171		0.046305
	LMNB2	-1.6257		0.018628				THY1	3.09102	0.003442					MAP1B	1.051		0.133005				H2A2A	1.72386		0.044797
	KV3AA	-1.63455		0.007139				LMNA	3.08148	0.001785					PSIP1	1.12902		0.133005				H10	1.70478		0.019485
	KV5A3	-1.71401		0.005845				RBM39	3.04677	0.002096					K1210	0.788472		0.133368				H33	1.69977		0.020637
	AP2A2	-1.72225		0.049333				MAP1A	3.03811	0.000205					NUCL	2.80134		0.135335				CS1A	1.58752		0.019485
	ELAV1	-1.7437		0.009089				KPYM	3.02405	0.000205					PURA	2.00162		0.135335				MLP3A	1.56983		0.023177
	HVM51	-1.77749		0.0045				CENPV	3.02341	0.004675					GCAA	-0.96167		0.137664				TMOD2	1.49481		0.025382
	KV5A4	-1.80004		0.004448				RS23	2.99454	0.000336					AT1A2	-1.55253		0.137664				RS23	1.47989		0.033976
	SMRD1	-1.82175		0.041952				TOP1	2.96733	0.003442					HVM10	-0.79538		0.14111				HVM51	1.43159		0.038873
	DDX1	-1.86022		0.008115				H13	2.93802	0.000336					PURB	1.54273		0.146424				DCLK2	1.18386		0.049946
	HVM53	-1.86211		0.034221				H15	2.87289	0.000464					MYL6	1.62743		0.148486				KV5A9	-2.22478		0.043314
	DEK	-1.88703		0.007257				H2AJ	2.79786	0.00015					GBB1	0.850712		0.148904				ERH	1.35298		0.052992
	KV2A6	-1.89931		0.007215				H14	2.78129	0.00375					AP2A2	3.01683		0.149593				PRP19	2.77396		0.053535
	HNRPM	-1.97051		0.004346				AT1A3	2.7797	0.000177					GCAB	-0.7744		0.150961				HMGA1	1.72579		0.0542
	BCLF1	-1.98895		0.041952				KPCG	2.71143	0.003187					RL37A	2.26008		0.152719				HMGN2	2.80855		0.05559
	NOP56	-2.01737		0.005508				PTN	2.6654	0.00322					LMNA	1.19276		0.158121				NOP58	1.873		0.055868
	TADBP	-2.03729		0.017				MAP1B	2.63086	0.000316					DCLK1	2.79936		0.161347				ACON	2.56147		0.058699
	BAF	-2.06069		0.030454				PSIP1	2.62456	0.000177					PARP1	1.62662		0.161347				FBRL	1.6491		0.058699
	RS11	-2.06396		0.004366				HNRPC	2.58172	0.002438					HNRPQ	2.5795		0.162327				KV5A4	1.13694		0.058946
	HVM57	-2.07215		0.006839				H2B1C	2.5652	0.000386					H4	0.987413		0.170671				ESIP1	2.94472		0.062853
	ZN148	-2.07241		0.012937				H2AV	2.51725	0.000447					RS16	0.898161		0.170873				SUCA	1.68879		0.067119
	NID1	-2.09912		0.035906				KV2A7	-2.51116	0.000609					MLP3B	1.82874		0.182515				IGHG3	1.00639		0.068115
	SMCA2	-2.1158		0.003778				KV2A6	-2.51302	0.002125					SYT1	1.01564		0.18786				SYT1	2.25631		0.07401
	PARP1	-2.13216		0.018628				KV5A6	-3.42472	0.00066					DYN1	1.02213		0.195715				KV5AF	2.50073		0.074439
	CBX5	-2.15223		0.008545				LUZP1	-6.57794	0.000774					HP1B3	1.92649		0.196322				DRC3	1.46751		0.074731
	MYH9	-2.16566		0.043392				ELAV3	6.78544		0.166119				MACF1	1.32883		0.197082				SF3B3	2.13285		0.074891
	ZC21A	-2.20991		0.024576				ACTS	5.68401		0.008613				CCAR2	0.912275		0.200612				ATPA	2.45027		0.075336
	PURA	-2.22047		0.003303				NUCL	5.4857		0.007777				RL10	1.1098		0.210024				SEP11	2.79917		0.077639
	KHDR3	-2.23403		0.009234				DCLK1	5.15129		0.015207				RNPS1	1.3554		0.210024				VIME	2.64018		0.079037
	RL23	-2.23886		0.00232				PRP8	4.41559		0.01374				ATPB	0.856474		0.21759				NH2L1	1.31761		0.080383
	ELAV4	-2.26126		0.04871				VIME	4.25943		0.010831				PI51C	1.41331		0.21759				INSY2	1.78604		0.082756
	RL3	-2.27155		0.008545				GBB1	4.22124		0.006331				NUMA1	1.22212		0.228005				NPM	1.40726		0.082756
	RLA0	-2.30694		0.024576				AT2B1	4.1648		0.01797				PFKAM	1.38276		0.232194				CH60	2.60778		0.083898
	HVM36	-2.30918		0.001684				PDCD6	3.96187		0.012839				HVM51	-0.68537		0.232194				RHG23	0.929721		0.083898
	HVM44	-2.32183		0.006021				HP1B3	3.92156		0.006147				SF3B3	1.78077		0.23834				BAF	2.42503		0.083945
	RBM39	-2.33663		0.017515				AGRIN	3.89317		0.027829				HMGA1	1.00805		0.240557				BASP1	2.14216		0.083945
	GCAA	-2.35281		0.001434				SEPT7	3.72382		0.037607				RL17	1.13307		0.241804				CO4A2	2.10802		0.085279
	RL6	-2.38199		0.002817				LAMB2	3.61016		0.076878				SMCA2	3.15483		0.243146				EF2	2.02088		0.085279
	RL27A	-2.41362		0.006021				DESP	3.49412		0.005533				RS11	0.624947		0.243146				KV2A6	0.987092		0.089024
	RS8	-2.41691		0.007139				SNW1	3.43505		0.019552				AP2M1	1.08157		0.244175				RS8	2.64325		0.093174
	RL37A	-2.44755		0.00901				SYN1	3.29135		0.009036				SMCE1	1.29757		0.244175				LMNB2	1.35664		0.093174
	DKC1	-2.46634		0.003328				MLP3B	3.24389		0.015207				HVM60	-1.29384		0.252679				RNPS1	2.01458		0.094706
	RL32	-2.4912		0.022613				PGBM	3.21882		0.012925				STXB1	1.43993		0.252699				KV3AE	1.23469		0.095337
	H2AJ	1.0682		0.050522				DEK	3.11875		0.008734				RAB3A	0.708812		0.259315				C1RA	1.27031		0.098447
	KCC2D	3.76018		0.053445				ROAA	3.02625		0.039551				BASP1	-1.80782		0.259434				RL23A	1.95413		0.102164
	CPEB2	2.23738		0.053445				CO4A2	3.02598		0.012553				HVM54	-0.67233		0.264949				DREB	2.55865		0.109441
	IF4A3	-2.30292		0.054467				ILF3	2.93163		0.115839				TMOD2	0.542094		0.27105				HVM05	1.96682		0.109441
	GRN	1.0745		0.056887				TRIM2	2.87926		0.005726				RBBP4	1.53491		0.273672				HVM03	1.3279		0.126737
	AP2A1	-1.18253		0.057118				RNPS1	2.87261		0.013519				PGCB	-1.03252		0.283081				GCAA	0.893558		0.127816
	HNRPF	2.10579		0.057541				DMD	2.85122		0.021744				RS8	1.12392		0.284464				NONO	-3.90339		0.135384
	HP1B3	-1.04555		0.059921				HMGN2	2.82546		0.034774				CAPZB	1.01532		0.288149				CBX3	1.46353		0.138899
	H2AW	-0.99957		0.059928				PARP1	2.64936		0.010528				THOC4	2.34629		0.288987				IGKC	0.891978		0.139467
	H11	-1.32028		0.060894				LMNB2	2.50607		0.00532				AP2S1	0.681625		0.293731				MYO15	1.87495		0.143967
	MASP1	0.950718		0.062537				EAA1	2.47568		0.053476				INSY2	0.867809		0.301589				MYEF2	2.55616		0.145764
	LMNA	-1.2203		0.064446				CBX3	2.4135		0.005003				H2B3B	0.873769		0.305094				KV5A3	0.869541		0.149493
	ZN326	-2.29402		0.064446				HMGA1	2.40569		0.004986				VIME	1.54521		0.310352				NUCL	1.98977		0.154195
	NEUG	2.49085		0.068905				KCRU	2.3591		0.009234				EI2BD	-0.70153		0.311824				SRSF3	1.38789		0.154195
	ILF2	-1.60178		0.06943				NH2L1	2.35857		0.007764				NEUM	0.817952		0.311824				KPYM	1.13086		0.154195
	CCAR2	-3.16692		0.06943				H2A2A	2.33462		0.005003				RAB3D	0.709271		0.316769				H11	2.68513		0.154564
	ATPB	1.81273		0.069544				TCPB	2.3288		0.015207				PDCD6	-0.91687		0.317723				CLUS	1.51932		0.157565
	KV6AA	-0.87646		0.069967				SMCE1	2.26856		0.030473				RHG23	0.477138		0.320548				NEUM	1.42515		0.160973
	HNRPK	-1.08662		0.070929				ATPB	2.2406		0.00045				H2A2A	0.775938		0.341698				KV3AI	1.46643		0.164773
	RS27	-1.4191		0.072282				H4	2.22363		0.003256				CLAP2	0.502309		0.347069				HVM10	0.841983		0.16829
	RS23	-1.48691		0.072282				H2B3B	2.20541		0.000269				CPSF1	0.929559		0.347069				PAK1	1.8984		0.168525
	CBX3	-2.14019		0.075385				UCHL1	2.13858		0.02076				TOP1	0.612237		0.347502				TCPB	2.11934		0.178869
	HVM54	-0.97364		0.076948				CLUS	2.13854		0.018579				RLA0	1.35813		0.347502				RS6	2.17127		0.18051
	KV5A9	-0.99588		0.077109				H10	2.11015		0.001085				DREB	0.703815		0.347502				HVM30	0.767837		0.18051
	KC1D	1.22305		0.077907				ALDOA	2.1016		0.004986				NH2L1	0.873452		0.347502				RL35	1.42311		0.180684
	SEPT7	3.17003		0.078835				H33	1.96558		0.001151				RBM39	0.619714		0.347502				NCAN	2.22664		0.189454
	ACTB	1.00799		0.079279				PAK1	1.9645		0.049764				DEK	0.831231		0.351764				GCAB	0.776167		0.197972
	CN37	0.999425		0.080147				MLP3A	1.95196		0.002037				NCAN	1.12438		0.355323				NUMA1	1.39019		0.19941
	MA6D1	1.54837		0.081212				NONO	1.906		0.011109				ACON	0.801496		0.363344				RBM39	1.14492		0.19941
	MATR3	-1.03182		0.081212				SYT1	1.80291		0.004986				EVA1B	-0.7511		0.366822				TENR	0.744461		0.206447
	MARK1	-1.76313		0.081212				IGHM	1.78304		0.031069				H33	0.5132		0.370164				PCBP2	1.83592		0.208429
	ACTN1	-1.40953		0.082768				CCD73	1.7794		0.251642				NR1H4	-1.92848		0.370427				PGCB	1.01529		0.208868
	ACTS	1.09578		0.082768				HBB1	1.76768		0.003625				ELAV3	5.06572		0.370427				THOC4	2.29343		0.215847
	KV3A1	-1.84825		0.0828				CBX5	1.67762		0.139692				DSC3	-1.42821		0.377097				SMCE1	1.69527		0.215847
	H4	-0.91455		0.088335				LAMC1	1.65639		0.209485				RBM14	0.456025		0.379395				TOP2B	1.41999		0.215847
	ERH	-2.27023		0.088471				CS1A	1.64298		0.005003				CBX3	1.17966		0.383572				KV5AC	0.6616		0.215847
	MYEF2	-1.09247		0.08887				SUCA	1.64296		0.00394				KV5AF	1.49703		0.3976				SEPT7	2.19183		0.215943
	MAP6	0.955286		0.091564				KCC2D	1.63768		0.187194				ATPA	0.521067		0.40285				CCD73	2.52159		0.220074
	STXB1	2.26774		0.092419				NEUM	1.61494		0.018108				BAF	0.854586		0.404851				HVM42	1.29028		0.225083
	ACTG	1.66591		0.093987				LDHA	1.58553		0.065704				MLP3A	0.525389		0.408756				LV1A	-0.69643		0.225659
	LMNB1	-0.82382		0.093987				NPM	1.55514		0.004083				ARGL1	0.491349		0.424017				ANK3	-0.88249		0.225659
	NO40	1.95209		0.097035				RAB14	1.46147		0.069323				DRC3	0.561302		0.425022				IP3KA	-0.87202		0.227992
	CREST	-1.30005		0.097745				C1RA	1.30921		0.005584				HS90B	0.57912		0.427302				PROX1	-1.3898		0.230449
	U5S1	-1.46412		0.101845				RSSA	1.23475		0.066004				SFPQ	1.30359		0.427302				RLA0	-1.39047		0.231647
	UCHL1	2.3341		0.110132				BAF	1.23373		0.047201				PRP19	0.894234		0.438086				CBX5	1.51322		0.232746
	KV5AA	-0.82015		0.110139				PLAK	1.22639		0.661756				KCRB	-0.85262		0.440276				PTPRZ	0.81185		0.234424
	DYN1	3.03237		0.110139				DRC3	1.13664		0.061391				CBX5	1.1075		0.448577				ENOA	1.2165		0.238549
	ANM3	1.15446		0.110883				ATPA	1.10187		0.055717				HMGN2	1.44524		0.467261				RL13	1.32205		0.242673
	HDGR3	-0.90157		0.110883				LDHB	1.07838		0.0885				ALDOA	0.523609		0.470802				KVM5	0.851572		0.248611
	KV5A7	-0.70425		0.112614				RAB3A	1.03753		0.103347				HVM05	-0.73472		0.470802				ALDOC	1.52752		0.251072
	AP1M1	1.58714		0.112614				KCRB	1.02536		0.192966				SNW1	0.540074		0.494812				KCC2D	0.967168		0.262687
	AP1B1	-1.12415		0.121689				BASP1	1.02092		0.298872				GFAP	0.912755		0.514081				NR1H4	-1.5693		0.262687
	ELAV3	-4.4819		0.121689				AT1A2	1.00997		0.484073				IP3KA	-0.67274		0.514081				PTN	1.47563		0.265444
	HNRPQ	-1.13189		0.121792				RAB3D	0.892447		0.069269				RAB14	0.566225		0.538539				ERC2	1.00972		0.266902
	RHG23	0.826787		0.121916				INSY2	0.752652		0.137014				HBB1	-0.94374		0.54544				LAC3	0.937826		0.267673
	DREB	-1.67511		0.126162				GRN	0.717193		0.335003				ENOA	0.579119		0.561891				PLAK	1.38121		0.269375
	E41L2	1.43578		0.131372				ARGL1	0.710386		0.242783				ALBU	-0.94584		0.568325				HVM54	0.589403		0.278944
	AT2A2	1.48746		0.13628				EVA1B	0.686691		0.378439				KCC2D	0.739553		0.568325				KV3A8	0.642464		0.286969
	NFL	1.01869		0.13628				MACF1	0.677537		0.622008				RL28	0.415226		0.569756				HVM57	0.546205		0.303046
	HNRDL	0.940011		0.140992				K1210	0.660665		0.0885				HBA	-1.29022		0.57226				GRN	0.715276		0.310105
	SMD2	-1.09383		0.141373				DCLK2	0.648024		0.1565				HNRPC	0.453592		0.586405				KV5A6	-0.70349		0.314147
	ANK2	-0.94828		0.14189				HBA	0.551344		0.622008				RS4X	-0.69419		0.608628				HVM06	0.642097		0.327466
	DRC3	-1.29489		0.142222				SHAN2	0.540235		0.153257				MYH9	0.360551		0.624514				ELAV3	5.16612		0.332074
	H14	-0.69848		0.148284				MDHM	0.517483		0.624698				PGBM	0.693815		0.632507				RAB14	1.02905		0.336465
	GRB2	2.3199		0.148379				RHG23	0.462968		0.145509				ZC21A	-0.41008		0.645597				EVA1B	0.920571		0.359374
	GNAO	1.16646		0.148441				RBM14	0.439103		0.211797				NDUA4	0.33542		0.646793				KV4A1	0.575205		0.370101
	CAMKV	0.950842		0.149162				AGRV1	0.194463		0.838347				RS6	-0.4141		0.646921				HDGR3	0.868117		0.374441
	GBB1	1.89519		0.149909				ALBU	0.167867		0.839037				PROX1	-0.91273		0.651822				HBB1	1.23418		0.386787
	SYN1	1.82323		0.15063				NO40	0.034819		0.94488				LAMB2	0.960496		0.651822				RL31	1.22103		0.386787
	SRSF3	-1.04887		0.15063				C1QA	-0.07167		0.838347				CO4A2	0.674779		0.655746				PDCD6	0.754189		0.389651
	PP1B	1.44038		0.153938				C1QC	-0.10456		0.734401				CCD73	0.918297		0.670092				DKC1	1.05649		0.397997
	RS15	-1.45705		0.158143				C1QB	-0.1895		0.498959				AT1A1	0.831949		0.670833				C1QA	0.437856		0.400309
	ROA3	-0.8079		0.158143				RIMS1	-0.23429		0.839037				RSSA	0.354302		0.671977				RIMS1	0.789072		0.407272
	ROA0	-1.09157		0.159995				CPSF1	-0.2343		0.88375				RL13	-0.3984		0.674997				LAMB2	1.70293		0.417129
	ARP2	1.56492		0.160673				DSC3	-0.23937		0.670355				C1QA	0.185785		0.694847				RBM14	0.478948		0.417129
	HVM30	-0.65617		0.160897				KV3AE	-0.27411		0.705431				KPYM	-0.32727		0.70538				EI2BD	0.6123		0.419224
	IGHM	-0.89052		0.168944				PROX1	-0.29589		0.848175				ILF3	0.323962		0.70538				SNW1	1.013		0.421581
	HNRPL	-0.87288		0.180075				IGHG3	-0.53568		0.103347				SYN1	0.452884		0.711485				LAC1	-0.95255		0.428728
	CAZA2	1.07436		0.182667				ANK3	-0.56693		0.605132				DCLK2	0.189225		0.735687				H2B2B	0.80636		0.432309
	ADT1	-2.23746		0.186162				PTPRZ	-0.65245		0.14792				ERC2	0.298635		0.738961				MDHM	1.12073		0.460641
	PSIP1	-0.69783		0.186645				GCAA	-0.76559		0.066456				LDHB	0.33383		0.748161				AT1A2	1.49313		0.462413
	C1QA	-0.58948		0.187694				PGCB	-0.80808		0.220808				PTPRZ	-0.23066		0.749429				DSC3	0.653243		0.512247
	ROA2	-0.65282		0.188485				HVM10	-0.89316		0.040006				NPM	0.179226		0.757315				IGG2B	0.316965		0.518273
	KPYM	1.71142		0.188485				KV6A5	-0.94352		0.042959				C1QB	0.11439		0.77423				PGBM	0.732093		0.536543
	DHX9	-0.68928		0.189404				GCAB	-0.98931		0.051536				KPCG	-0.35352		0.776932				HVM36	-0.44076		0.561113
	KV5A1	-0.67553		0.191032				KV5A4	-1.07388		0.015207				RL31	0.260041		0.784491				KV5A7	0.34493		0.597104
	ILF3	-1.06803		0.193803				IGKC	-1.09618		0.005003				1433E	0.397432		0.791995				HBA	0.756633		0.603716
	SFPQ	-2.1622		0.194318				KV5A3	-1.14292		0.015207				DYH8	-0.23549		0.801356				HVM17	0.319804		0.622841
	CLUS	-0.85137		0.195739				LAC3	-1.18		0.246379				MYPR	0.224994		0.806261				KV6A5	0.258157		0.63872
	MLF2	-0.92278		0.20514				HVM54	-1.22075		0.067434				PLAK	-0.35504		0.812855				EAA1	0.338518		0.639411
	SUCA	0.916804		0.206273				RBP17	-1.2591		0.22323				TCPB	0.147564		0.840867				KV6AA	0.335054		0.639411
	H13	-1.07079		0.206273				HVM51	-1.27164		0.008628				IQEC1	0.097812		0.847146				SHAN2	-0.41392		0.654959
	RAN	1.05296		0.216752				KV5A1	-1.2864		0.005306				RL23A	0.213759		0.89215				KCRB	0.464702		0.679688
	H10	-0.59851		0.222647				KVM5	-1.3226		0.004675				MDHM	0.111262		0.928714				KPCG	0.328645		0.685162
	H15	-0.72446		0.222753				KV5AF	-1.37407		0.370068				C1QC	0.029903		0.941767				RBP17	-0.36404		0.753026
	NPM	-1.24525		0.229361				HVM57	-1.40741		0.008923				EAA1	0.076759		0.95588				IQEC1	-0.36718		0.753026
	LAC1	-0.56655		0.231137				IGHG1	-1.43392		0.006915				DYL1	10.0437	1.49e-05		Yes			ALBU	-0.14165		0.902299
	H2B1C	-0.58121		0.23348				KV5AC	-1.49023		0.003832				DYL2	9.44552	1.89e-05		Yes			ALDOA	0.176255		0.906059
	NDUA4	1.20207		0.234662				TENR	-1.55324		0.002338				GEPH	8.88024	1.53e-05		Yes			AP1G1	-0.26805		0.914603
	H33	-0.55784		0.235497				KV6AA	-1.56811		0.001116											KV2A7	-0.0689		0.918422
	RGPA1	-0.65256		0.235499				KV4A1	-1.7265		0.015207											C1QC	0.055257		0.921624
	FUS	-1.07024		0.240582				IGG2B	-1.88348		0.000598											ARGL1	-0.07757		0.921624
	RS26	0.48728		0.250286				HVM30	-1.88806		0.003432											K1210	-0.07467		0.93862
	GSK3B	1.4033		0.2551				KV5A7	-2.05894		0.001699											RAB3A	-0.04423		0.94648
	MAP4	0.7549		0.255738				IQEC1	-2.11992		0.12944											C1QB	-0.02988		0.954085
	H2AY	-0.52579		0.260374				HVM36	-2.15845		0.004997											KV5A1	0.031672		0.958992
	TR150	-1.31704		0.270423				HVM06	-2.16871		0.001365											NO40	0.032463		0.970331
	HVM06	0.49988		0.27085				LV1A	-2.6514		0.008628											DYL1	10.8889	9.64e-06		Yes
	CAN7	0.772498		0.275379				LAC1	-2.91015		0.052837											DYL2	9.57078	2.04e-05		Yes
	SYNPO	0.552127		0.283922				NR1H4	-3.3704		0.048256											GEPH	9.49507	4.78e-06		Yes
	H2A2A	-0.48181		0.292442				CO1A1	-3.96437		0.038424
	VWA1	-0.74237		0.297221				PRC2A	-4.258		0.019669
	RMXL1	-0.54653		0.297664				DYL1	10.6476	3.91e-05		Yes
	MLP3B	-0.58469		0.298541				DYL2	10.3391	6.25e-05		Yes
	TBB3	0.889185		0.306998				GEPH	9.02113	8.09e-05		Yes
	HMGN2	-0.85151		0.31448
	NOLC1	-1.25247		0.31611
	RALY	-0.92551		0.317121
	NH2L1	-0.52938		0.317121
	C1QC	-0.41935		0.329657
	KCRB	1.25637		0.332515
	MYPR	0.927894		0.341475
	CHTOP	-0.6644		0.342267
	HVM35	-0.50563		0.344444
	RNPS1	-0.7601		0.344444
	DCLK1	1.14398		0.344444
	NCOA5	-0.79749		0.34632
	DCLK2	0.701741		0.348186
	SF3A1	-0.95088		0.351642
	NFIX	-0.97768		0.352751
	RUVB1	-1.80836		0.353329
	MECP2	-0.49014		0.360277
	CLH1	0.616593		0.360277
	KHDR1	-0.55985		0.362657
	DGKB	0.81369		0.362668
	C1QB	-0.38827		0.374192
	DHX15	-1.47557		0.374192
	PI51C	1.00107		0.376836
	RS27A	-0.63013		0.376836
	PKP4	-0.49936		0.378463
	ATPA	0.849631		0.378677
	P66B	1.46243		0.378677
	AP2M1	-0.37527		0.378677
	RBM14	2.68351		0.378677
	AT1A1	1.09334		0.386035
	GCP2	0.983416		0.386739
	ALBU	-0.64169		0.388317
	HPHL1	0.571124		0.393614
	NEUA	-1.21351		0.394698
	U2AF1	-0.72833		0.395885
	U520	-0.98171		0.395885
	NFM	0.619189		0.400839
	HNRPC	-0.42578		0.400924
	HNRH2	0.775398		0.402847
	LDHB	1.48384		0.402847
	CAPZB	0.620079		0.410956
	LV1A	-0.4157		0.413736
	SPTB2	-0.4817		0.413736
	AINX	0.382386		0.417469
	HBA	0.665868		0.417946
	ALDOC	1.15115		0.417946
	PFKAM	0.750474		0.417946
	DYH8	-0.58425		0.420871
	AP2S1	-0.64195		0.424059
	ARGL1	-0.59127		0.429081
	RAB3A	-0.4327		0.434763
	ALG2	0.642165		0.435809
	ACL6B	-1.00305		0.447978
	PCLO	-1.1267		0.453553
	CO4A2	-0.51104		0.456905
	SRRM2	0.613404		0.465894
	SMU1	-0.77848		0.47044
	DDX3X	-0.58283		0.480939
	NFAT5	-0.80987		0.488064
	PTN	-0.43023		0.488064
	LAC3	0.36495		0.495015
	PROX1	0.47459		0.495089
	ROA1	-0.44639		0.495848
	MYL6	-0.40919		0.504014
	ARI1A	-0.75083		0.510404
	ALDOA	-0.78855		0.510629
	HVM05	-0.41728		0.516495
	DDX17	-0.36408		0.518456
	NFIA	-0.524		0.521189
	HMGA1	-0.29644		0.539336
	THY1	-0.48854		0.539336
	IGHG3	0.246308		0.539336
	SF3B1	0.764693		0.543155
	CO4B	-0.32391		0.543155
	CCD73	-0.76126		0.543155
	MAP1A	-0.25774		0.552808
	MYH10	-0.37683		0.561
	MBP	-0.35324		0.561551
	H12	-0.36676		0.578353
	IQEC1	1.05218		0.585058
	GBB2	0.33359		0.59152
	TBA1C	0.396414		0.604712
	FBLL1	-0.43872		0.61856
	MARK2	-0.52387		0.626141
	EAA1	0.206575		0.630177
	SNW1	-0.38638		0.639438
	SPTN1	-0.21899		0.656139
	ROAA	0.538224		0.662303
	LV2A	-0.32729		0.662303
	F13A	0.294074		0.662303
	MACF1	0.37256		0.665268
	MLP3A	-0.18759		0.665268
	PLEC	0.515107		0.684988
	TRIM3	-0.48752		0.684988
	KV3AE	-0.37966		0.691443
	TFAM	-0.1979		0.702141
	HVM17	-0.23031		0.704551
	FCGR1	-0.1538		0.723549
	CO3	-0.19375		0.739401
	GCAB	-0.14846		0.741641
	GFAP	0.184681		0.741942
	HDAC2	0.316769		0.743479
	ADT2	-0.31943		0.749021
	K1210	-0.19014		0.758677
	MYO5A	-0.16729		0.763111
	TMOD2	-0.24794		0.763111
	H2AV	-0.20105		0.763738
	PCBP2	0.147338		0.769427
	KV6A5	0.120301		0.772204
	SYT1	-0.36638		0.77389
	UBF1	0.150852		0.791966
	GHC1	-0.19805		0.794591
	KV3A8	-0.22751		0.805753
	MAP1B	-0.10416		0.820503
	TCOF	-0.21737		0.821491
	CS1A	-0.0969		0.83543
	HVM10	-0.09888		0.838519
	SYGP1	-0.25442		0.838519
	ADDA	0.136612		0.842175
	MAP7	0.314266		0.85419
	PRP8	-0.44237		0.855791
	NFH	0.171956		0.875005
	H2B3B	-0.06948		0.875005
	HNRH1	0.084407		0.884519
	HVM52	0.199849		0.888471
	MPCP	0.134031		0.894559
	RSSA	0.108244		0.899056
	SMCE1	-0.12143		0.90365
	CSKI1	-0.11052		0.920089
	ATRX	-0.12855		0.920089
	CDKL5	0.060064		0.923238
	RBBP4	0.126761		0.923238
	C1RA	0.0379		0.938489
	LAC2	0.036441		0.942038
	KPCG	0.044785		0.964346
	DSC3	-0.00112		0.998597
	GEPH	14.7665	3.01e-05		Yes
	IQEC3	11.9361	2.77e-05		Yes
	DYL2	9.81119	6.69e-05		Yes
	ENAH	8.76191	0.000577		Yes
	ARHG9	8.51971	0.000577		Yes
	DYL1	8.44391	2.77e-05		Yes
	PIN1	2.79748	0.01535		Yes

## Sheet: Panel B
	Figure 5 - Supplement 2 - Panel B: Interactor enrichment plots
	Plots indicating the range of interactor abundance relative to gephyrin.
	Antibody 3B11							DARPin hFc 27B3							DARPin hFc 27F3							DARPin hFc 27G2
			Abundance rel. Gephyrin							Abundance rel. Gephyrin							Abundance rel. Gephyrin							Abundance rel. Gephyrin
	Protein Name	Interactor	All Interactors	Canonical interactor				Protein Name	Interactor	All Interactors	Canonical interactor				Protein Name	Interactor	All Interactors	Canonical interactor				Protein Name	Interactor	All Interactors	Canonical interactor
	SRBS1	1	3.59e-06					PX11B	1	6.55e-06					RHG44	1	2.58e-06					ACINU	1	2.25e-06
	SV2A	2	4.15e-06					RHG44	2	6.88e-06					IFFO1	2	3.87e-06					CDC5L	2	2.91e-06
	MARE3	3	4.43e-06					ZN148	3	7.55e-06					SEPT8	3	4.82e-06					FAK2	3	3.62e-06
	RHG44	4	4.53e-06					CDKL5	4	8.22e-06					PP2BB	4	4.85e-06					GCP2	4	4.38e-06
	MAGI1	5	4.7e-06					RUVB2	5	8.23e-06					TCPE	5	5.13e-06					GPDM	5	4.61e-06
	HS71A	6	6.52e-06					RT34	6	8.75e-06					DLGP1	6	5.21e-06					HDAC2	6	4.9e-06
	CYTB	7	6.98e-06					AGO2	7	8.91e-06					AUXI	7	5.62e-06					FN3K	7	5e-06
	CLAP2	8	9.04e-06					SLTM	8	9.54e-06					TSR2	8	6.8e-06					UBF1	8	5e-06
	DYHC1	9	9.63e-06					HS74L	9	1.04e-05					MARE3	9	7e-06					DLG3	9	5.07e-06
	RCC2	10	9.83e-06					PGAM5	10	1.05e-05					RL24	10	7.46e-06					EMAL1	10	6.31e-06
	STX1B	11	9.99e-06					LZTS3	11	1.11e-05					RS13	11	8.12e-06					RTRAF	11	7.03e-06
	EDC4	12	1e-05					DX39B	12	1.16e-05					PFKAP	12	8.4e-06					RL12	12	7.29e-06
	SEPT5	13	1.01e-05					SRSF5	13	1.18e-05					DNJA1	13	8.77e-06					TBG1	13	7.44e-06
	ENOA	14	1.02e-05					AP1M2	14	1.2e-05					RN123	14	9.09e-06					NUMBL	14	7.53e-06
	GBRB2	15	1.04e-05					SF3A1	15	1.28e-05					DYHC1	15	9.28e-06					HS74L	15	7.79e-06
	WDR47	16	1.04e-05					PLEC	16	1.37e-05					RS3	16	9.33e-06					AT2A2	16	7.92e-06
	CTND2	17	1.04e-05					TCPD	17	1.37e-05					HMGN1	17	1.02e-05					RHG44	17	8.76e-06
	SH3G1	18	1.22e-05					IF2G	18	1.41e-05					ELAV4	18	1.02e-05					ALG2	18	8.81e-06
	CTND1	19	1.27e-05					TSR2	19	1.42e-05					CNKR2	19	1.03e-05					AMPH	19	8.87e-06
	GPDM	20	1.28e-05					K1107	20	1.52e-05					E41L1	20	1.05e-05					RS5	20	8.88e-06
	SEPT6	21	1.46e-05					MARE3	21	1.54e-05					ANK3	21	1.08e-05					GP158	21	9.49e-06
	TCPQ	22	1.47e-05					EF1G	22	1.54e-05					ACTN1	22	1.15e-05					LZTS3	22	9.67e-06
	PIN1	23	1.58e-05					AT1B2	23	1.56e-05					CTND2	23	1.15e-05					RS9	23	9.7e-06
	GBRA2	24	1.63e-05					IF4E	24	1.61e-05					NPTXR	24	1.18e-05					MABP1	24	1.02e-05
	ATAD5	25	1.69e-05					WDR19	25	1.64e-05					GRB2	25	1.22e-05					CPEB2	25	1.03e-05
	NSF	26	1.76e-05					ANM8	26	1.64e-05					LEG9	26	1.35e-05					KC1D	26	1.05e-05
	CNKR2	27	1.77e-05					SRPK2	27	1.66e-05					AJM1	27	1.36e-05					SV2A	27	1.09e-05
	NCKP1	28	1.99e-05					MARK3	28	1.68e-05					PP2AA	28	1.4e-05					RL10	28	1.12e-05
	COF1	29	2.02e-05					AMPH	29	1.72e-05					RS2	29	1.44e-05					GCP3	29	1.15e-05
	ANK3	30	2.24e-05					NCOA5	30	1.73e-05					VASP	30	1.48e-05					RL24	30	1.15e-05
	EVL	31	2.29e-05					CLCB	31	1.75e-05					CSKI1	31	1.51e-05					CLCA	31	1.2e-05
	SNP25	32	2.34e-05					GBRA2	32	1.78e-05					SKT	32	1.55e-05					UN45A	32	1.24e-05
	AJM1	33	2.4e-05					GPDM	33	1.78e-05					AAR2	33	1.55e-05					UCHL1	33	1.24e-05
	AT2B1	34	2.67e-05					TCPE	34	1.79e-05					HSP72	34	1.57e-05					RL18A	34	1.26e-05
	1433B	35	3.21e-05					COR2B	35	1.79e-05					ARPC3	35	1.57e-05					SDHB	35	1.28e-05
	GUAD	36	3.23e-05					RM47	36	1.83e-05					KV3A8	36	1.58e-05					RCC2	36	1.34e-05
	GBRG2	37	3.45e-05					PP2BB	37	1.84e-05					BCLF1	37	1.59e-05					RL37A	37	1.46e-05
	DTNB	38	3.8e-05					CHD8	38	1.89e-05					GBRA2	38	1.6e-05					SEPT8	38	1.48e-05
	VASP	39	4.16e-05					DAAM2	39	1.91e-05					DPYL1	39	1.6e-05					RL7	39	1.49e-05
	CALM3	40	4.87e-05					SDHB	40	1.98e-05					GBRB2	40	1.62e-05					GNB5	40	1.49e-05
	SNTB2	41	5.37e-05					PRC2C	41	2e-05					SEPT6	41	1.63e-05					MLF2	41	1.51e-05
	CADH2	42	5.54e-05					WDR13	42	2.01e-05					ASGL1	42	1.75e-05					KIF2A	42	1.51e-05
	SYN2	43	5.8e-05					RIMB2	43	2.02e-05					DDX3X	43	1.82e-05					RS3A	43	1.51e-05
	SKT	44	5.81e-05					CELF2	44	2.02e-05					HPHL1	44	1.88e-05					GRB2	44	1.52e-05
	PRDX1	45	6.12e-05					RL9	45	2.18e-05					ILF2	45	1.89e-05					TSC2	45	1.56e-05
	GRP75	46	6.47e-05					FNBP1	46	2.2e-05					HS71A	46	2e-05					PABP1	46	1.57e-05
	THIO	47	6.56e-05					RS10	47	2.2e-05					DTNB	47	2.01e-05					RL17	47	1.59e-05
	EFTU	48	7.45e-05					IF4A3	48	2.22e-05					AGAP2	48	2.01e-05					CCSAP	48	1.6e-05
	MAGI2	49	7.6e-05					KV5A6	49	2.22e-05					PCLO	49	2.01e-05					CDK5	49	1.63e-05
	SYNJ1	50	7.76e-05					CSK22	50	2.3e-05					HVM06	50	2.01e-05					FCGR1	50	1.64e-05
	1433E	51	7.9e-05					CPEB2	51	2.33e-05					FN3K	51	2.18e-05					CC177	51	1.64e-05
	NLGN3	52	8.07e-05					PITM2	52	2.34e-05					SEPT5	52	2.56e-05					HSP72	52	1.73e-05
	MK01	53	8.2e-05					NUMA1	53	2.4e-05					KCC2G	53	2.61e-05					CDKL5	53	1.81e-05
	TPIS	54	8.28e-05					GUAD	54	2.42e-05					GRP75	54	2.64e-05					ARPC3	54	1.85e-05
	BSN	55	8.85e-05					VASP	55	2.46e-05					CADH2	55	2.71e-05					ANS1B	55	1.87e-05
	DMD	56	9.41e-05					EVL	56	2.48e-05					CPSF5	56	2.84e-05					E41L1	56	1.88e-05
	DTNA	57	9.57e-05					SEPT6	57	2.52e-05					HVM30	57	3.41e-05					RL7A	57	1.9e-05
	DPYL1	58	0.000102					FCGR1	58	2.53e-05					WASF1	58	3.53e-05					TCPE	58	1.94e-05
	2AAA	59	0.000103					CAVN1	59	2.55e-05					ATAD5	59	3.61e-05					MARE3	59	1.97e-05
	1433S	60	0.000105					MAP11	60	2.62e-05					EVL	60	3.68e-05					NEUA	60	2.01e-05
	PCBP1	61	0.000112					U5S1	61	2.73e-05					PRDX1	61	3.72e-05					E41L2	61	2.06e-05
	COL12	62	0.000115					NAV1	62	2.73e-05					LANC2	62	4.14e-05					RALY	62	2.07e-05
	TAU	63	0.000119					ACINU	63	2.76e-05					MASP1	63	4.23e-05					SMCA2	63	2.12e-05
	GPX4	64	0.000125					GBRG2	64	2.77e-05					GBB2	64	4.24e-05					AP1M1	64	2.14e-05
	1433F	65	0.000133					FA98B	65	2.77e-05					MAGI2	65	4.26e-05					SRBS1	65	2.16e-05
	NPTXR	66	0.000144					GNB5	66	2.86e-05					GLRA3	66	4.32e-05					ACL6B	66	2.16e-05
	NLGN2	67	0.000161					TTC9B	67	2.88e-05					COF1	67	4.35e-05					RL32	67	2.27e-05
	CFTR	68	0.000163					GCP5	68	2.92e-05					CYFP2	68	4.49e-05					GBRB2	68	2.28e-05
	GLRA3	69	0.000164					SEPT8	69	2.98e-05					CTNA2	69	4.51e-05					TCPZ	69	2.31e-05
	AT1B1	70	0.000165					C2C4C	70	2.99e-05					CAMKV	70	4.67e-05					SFPQ	70	2.32e-05
	EAA2	71	0.000165					KC1D	71	3.01e-05					NLGN3	71	4.77e-05					RL23	71	2.36e-05
	1433G	72	0.000173					RUVB1	72	3.02e-05					KV2A7	72	4.82e-05					DHB4	72	2.38e-05
	CTNB1	73	0.000186					LANC1	73	3.06e-05					TENR	73	4.9e-05					AGAP2	73	2.39e-05
	GLNA	74	0.000206					MA7D2	74	3.09e-05					PIN1	74	4.93e-05					CMC1	74	2.43e-05
	CTNA2	75	0.000216					HMGN1	75	3.1e-05					ESIP1	75	5.2e-05					MYH9	75	2.44e-05
	GBRB3	76	0.00024					ITSN1	76	3.11e-05					MK01	76	5.36e-05					MARK1	76	2.45e-05
	GBRA1	77	0.000277					SDHA	77	3.16e-05					EFTU	77	5.37e-05					TCPG	77	2.48e-05
	TBB5	78	0.000278					CHERP	78	3.17e-05					TRUB1	78	5.58e-05					ABI1	78	2.48e-05
	ZN638	79	0.000301					RAN	79	3.18e-05					SYNJ1	79	5.66e-05					NPTXR	79	2.54e-05
	EF1A1	80	0.000332					RS27	80	3.24e-05					GSK3B	80	5.93e-05					DYHC1	80	2.58e-05
	1433T	81	0.000337					PDK3	81	3.26e-05					KV5A6	81	6.05e-05					TSR2	81	2.6e-05
	INSY1	82	0.000404					ELAV4	82	3.27e-05					ANK2	82	6.07e-05					LANC1	82	2.65e-05
	PRDX5	83	0.00041					VATB2	83	3.27e-05					PCBP2	83	6.07e-05					TCPQ	83	2.79e-05
	1433Z	84	0.000464					PRPS1	84	3.3e-05					1433F	84	6.25e-05					ATAD5	84	2.81e-05
	HS105	85	0.00048					TOP2B	85	3.3e-05					KHDR1	85	6.31e-05					PP2AA	85	2.87e-05
	SIR2	86	0.000483					SMU1	86	3.37e-05					CTNB1	86	6.46e-05					GUAD	86	2.96e-05
	PROF2	87	0.000541					NUMBL	87	3.4e-05					SYNPO	87	6.56e-05					ODPA	87	2.98e-05
	BASP1	88	0.000545					CDC5L	88	3.44e-05					SNTB2	88	6.62e-05					DEK	88	2.99e-05
	TBB4A	89	0.000572					ASGL1	89	3.46e-05					2ABA	89	6.75e-05					RBM27	89	2.99e-05
	ARHG9	90	0.000645					TRIM9	90	3.49e-05					BSN	90	6.82e-05					TADBP	90	3.02e-05
	LEG9	91	0.000658					ZFR	91	3.5e-05					TPIS	91	6.83e-05					FBLL1	91	3.02e-05
	BIP	92	0.000778					NDK7	92	3.5e-05					H11	92	7.33e-05					RL27	92	3.03e-05
	IQEC2	93	0.000828					HNRPF	93	3.68e-05					SRSF3	93	8.28e-05					RL6	93	3.04e-05
	GLRA2	94	0.000834					ACTN1	94	3.72e-05					KV5A1	94	8.34e-05					CNKR2	94	3.12e-05
	INSY2	95	0.000851					RBBP4	95	3.72e-05					SAFB1	95	8.4e-05					GBB2	95	3.22e-05
	RO52	96	0.000991					TRUB1	96	3.79e-05					TAU	96	8.99e-05					CTND1	96	3.26e-05
	GLRB	97	0.001182					IF4A1	97	3.85e-05					1433S	97	9.17e-05					SAFB1	97	3.26e-05
	DYL2	98	0.001274					CSK2B	98	3.87e-05					GNAO	98	9.26e-05					RL10A	98	3.38e-05
	KCC2B	99	0.001278					NEUA	99	3.87e-05					EAA2	99	9.75e-05					ASGL1	99	3.42e-05
	FUBP2	100	0.001319					UBP10	100	3.92e-05					DDX5	100	9.86e-05					GBRA2	100	3.44e-05
	TBA1B	101	0.001897					M2OM	101	3.94e-05					TPPP	101	0.000105					PURB	101	3.5e-05
	CS044	102	0.003413					GRB2	102	3.98e-05					ELAV1	102	0.000106					C2D1A	102	3.5e-05
	RHG32	103	0.005619					CAMP2	103	4.01e-05					GPX4	103	0.000107					DTNB	103	3.6e-05
	KCC2A	104	0.00741					RL36A	104	4.1e-05					DTNA	104	0.000118					LDHB	104	3.7e-05
	HSP7C	105	0.007845					TCPG	105	4.11e-05					NFL	105	0.000126					HNRPQ	105	3.72e-05
	ENAH	106	0.008105					HPHL1	106	4.12e-05					GLNA	106	0.000134					CSKI1	106	3.78e-05
	DYL1	107	0.015155					SNTB2	107	4.12e-05					ANM3	107	0.000137					MA6D1	107	3.93e-05
	IQEC3	108	0.036268					IF4B	108	4.21e-05					NFM	108	0.000144					EVL	108	3.96e-05
	KV3AI	109	0.355439					HSP72	109	4.22e-05					1433G	109	0.000168					CAPZB	109	3.99e-05
	IGHG1	110	0.636519					DNJA1	110	4.29e-05					PP2BA	110	0.000177					DPYL1	110	4.12e-05
	GEPH	111	1					RP3A	111	4.39e-05					NLGN2	111	0.000183					SNTB2	111	4.17e-05
	GBRB2	15		1.04e-05				VPP1	112	4.43e-05					TBB3	112	0.000185					1433B	112	4.22e-05
	PIN1	23		1.58e-05				ARPC3	113	4.46e-05					PRDX5	113	0.000187					NCKP1	113	4.24e-05
	GBRA2	24		1.63e-05				CPSF2	114	4.65e-05					INSY1	114	0.000195					WASF1	114	4.28e-05
	EVL	31		2.29e-05				SV2A	115	4.74e-05					AP2A1	115	0.000202					NSF	115	4.32e-05
	GBRG2	37		3.45e-05				TCPQ	116	4.76e-05					GBRA1	116	0.00021					AT1A1	116	4.36e-05
	DTNA	57		9.57e-05				RALY	117	4.78e-05					BCAS1	117	0.000217					CAMP3	117	4.59e-05
	NLGN2	67		0.000161				TCPZ	118	4.82e-05					MAP4	118	0.000272					ACTN1	118	4.83e-05
	GBRB3	76		0.00024				SR140	119	4.85e-05					RMXL1	119	0.000277					MYL6	119	4.84e-05
	GBRA1	77		0.000277				RS15A	120	4.94e-05					GBRB3	120	0.000285					PP1B	120	4.86e-05
	ARHG9	90		0.000645				SPAS2	121	4.97e-05					HS105	121	0.00032					CHTOP	121	4.89e-05
	GLRB	97		0.001182				SMD3	122	5.03e-05					AINX	122	0.000323					PCLO	122	4.97e-05
	DYL2	98		0.001274				SMCA2	123	5.1e-05					MAGI3	123	0.000348					MARK2	123	4.99e-05
	ENAH	106		0.008105				RS12	124	5.22e-05					BIP	124	0.000349					PFKAM	124	5.03e-05
	DYL1	107		0.015155				NFH	125	5.23e-05					HNRH1	125	0.00042					VASP	125	5.09e-05
	IQEC3	108		0.036268				PRC2B	126	5.27e-05					SRCN1	126	0.000424					EFTU	126	5.13e-05
	GEPH	111		1				AT1A1	127	5.27e-05					GLRA2	127	0.000443					GRP75	127	5.23e-05
								CLCA	128	5.37e-05					TBB4A	128	0.000446					SDHA	128	5.24e-05
								CDK5	129	5.46e-05					CN37	129	0.000486					AP2A2	129	5.31e-05
								KHDR3	130	5.58e-05					GLRB	130	0.000508					DGKB	130	5.34e-05
								THIO	131	5.62e-05					1433T	131	0.000518					PRDX1	131	5.34e-05
								FBLL1	132	5.67e-05					TBB5	132	0.000523					SYN2	132	5.46e-05
								VATG2	133	5.7e-05					SIR2	133	0.000552					THY1	133	5.55e-05
								DHX30	134	5.79e-05					ZN638	134	0.000568					F120A	134	5.67e-05
								WDR33	135	5.83e-05					ARHG9	135	0.000586					PIN1	135	5.74e-05
								ABI2	136	5.87e-05					HNRPU	136	0.000596					CAMKV	136	5.79e-05
								BRSK2	137	5.88e-05					IQEC2	137	0.000613					SMRC2	137	6.04e-05
								MPCP	138	5.9e-05					MTAP2	138	0.00064					COF1	138	6.06e-05
								SEP11	139	5.9e-05					PROF2	139	0.000648					HNRDL	139	6.11e-05
								MAP9	140	5.98e-05					FUBP2	140	0.000678					RP3A	140	6.15e-05
								ABI1	141	6.03e-05					DPYL2	141	0.000762					ROA0	141	6.15e-05
								ACL6B	142	6.09e-05					KCC2B	142	0.000792					PFKAL	142	6.2e-05
								PDK1	143	6.23e-05					TBA1B	143	0.001335					SYNJ1	143	6.24e-05
								CTND1	144	6.25e-05					CFTR	144	0.001406					NFH	144	6.29e-05
								DYHC1	145	6.27e-05					MAP6	145	0.001454					WDR47	145	6.51e-05
								U520	146	6.31e-05					EF1A1	146	0.001547					MAGI2	146	6.67e-05
								KIF5C	147	6.39e-05					TBB2A	147	0.001561					2ABA	147	6.79e-05
								DKC1	148	6.46e-05					CS044	148	0.002025					TTC9B	148	6.86e-05
								KPCG	149	6.47e-05					DYL2	149	0.002116					AT2B1	149	6.89e-05
								NCKP1	150	6.59e-05					RHG32	150	0.002436					CPSF5	150	7.2e-05
								KC1A	151	6.62e-05					SEPT7	151	0.00305					DDX3X	151	7.23e-05
								TOP1	152	6.64e-05					KCC2A	152	0.005303					DDX17	152	7.34e-05
								BDH	153	6.69e-05					HSP7C	153	0.006563					AT1B1	153	7.43e-05
								FIP1	154	6.71e-05					TBB4B	154	0.008129					ELAV1	154	7.59e-05
								DGKB	155	6.87e-05					ENAH	155	0.009135					AP1B1	155	7.63e-05
								KV2A7	156	6.94e-05					DYL1	156	0.012832					M2OM	156	8.23e-05
								CLAP2	157	6.97e-05					IQEC3	157	0.039686					DTNA	157	8.25e-05
								CAPZB	158	7e-05					GEPH	158	1					MYO5A	158	8.31e-05
								LANC2	159	7.05e-05					GBRA2	38		1.6e-05				1433E	159	8.34e-05
								CSKI1	160	7.11e-05					GBRB2	40		1.62e-05				NOP56	160	8.51e-05
								VATD	161	7.19e-05					EVL	60		3.68e-05				SYN1	161	8.52e-05
								CTND2	162	7.5e-05					DTNA	104		0.000118				KCC2G	162	8.55e-05
								DHX15	163	7.62e-05					NLGN2	111		0.000183				CTND2	163	8.56e-05
								VPS41	164	7.62e-05					GBRA1	116		0.00021				GLRA3	164	8.59e-05
								TMOD2	165	7.67e-05					GBRB3	120		0.000285				GSK3B	165	8.82e-05
								TADBP	166	7.79e-05					GLRB	130		0.000508				ASB17	166	9.13e-05
								FN3K	167	7.92e-05					ARHG9	135		0.000586				DZAN1	167	9.53e-05
								PP2AA	168	8.16e-05					DYL2	149		0.002116				MYH10	168	9.59e-05
								FMR1	169	8.27e-05					ENAH	155		0.009135				1433S	169	0.000101
								THY1	170	8.31e-05					DYL1	156		0.012832				AP2B1	170	0.000104
								KCC2G	171	8.32e-05					IQEC3	157		0.039686				SEPT5	171	0.000105
								ACON	172	8.34e-05					GEPH	158		1				KHDR1	172	0.000105
								PIN1	173	8.36e-05												GNAO	173	0.000107
								AJM1	174	8.38e-05												CPSF7	174	0.000109
								COF1	175	8.44e-05												TRUB1	175	0.000114
								MTMR5	176	8.54e-05												PIMT	176	0.000119
								PI51C	177	8.67e-05												GPX4	177	0.000119
								DLG1	178	8.7e-05												TPPP	178	0.000121
								SYGP1	179	8.72e-05												RPOM	179	0.000121
								CADH2	180	8.73e-05												THIO	180	0.000124
								AGAP2	181	8.75e-05												CYFP2	181	0.00013
								U2AF1	182	8.77e-05												TPIS	182	0.000136
								MA6D1	183	8.77e-05												TFAM	183	0.000136
								CNKR2	184	8.92e-05												PFKAP	184	0.000138
								TXTP	185	9.16e-05												NLGN3	185	0.000139
								ML12B	186	9.22e-05												RS18	186	0.000139
								RS26	187	9.24e-05												MK01	187	0.000145
								RENT1	188	9.28e-05												ANM1	188	0.000148
								E41L2	189	9.33e-05												RS27A	189	0.000151
								C1QT4	190	9.42e-05												1433F	190	0.000154
								RTRAF	191	9.52e-05												HNRPM	191	0.000157
								ENOA	192	9.58e-05												E41L3	192	0.000157
								SEPT5	193	9.58e-05												GBRB3	193	0.000159
								NLGN3	194	9.89e-05												RS3	194	0.00016
								VPS18	195	9.9e-05												HNRH2	195	0.000161
								MYH9	196	0.0001												SKT	196	0.000163
								CCSAP	197	0.000102												HNRL2	197	0.000164
								DPYL1	198	0.000103												GFAP	198	0.000165
								2AAA	199	0.000103												HP1B3	199	0.000176
								GBB2	200	0.000104												BRSK1	200	0.00018
								TCPA	201	0.000105												MLP3B	201	0.000183
								TPPP	202	0.000106												AJM1	202	0.000189
								SYN2	203	0.000108												SYNPO	203	0.000196
								GHC1	204	0.000108												ANK2	204	0.000196
								DNJB6	205	0.000109												TAU	205	0.000197
								SF3B1	206	0.000109												MAP7	206	0.000199
								GLRA3	207	0.00011												LMNB1	207	0.000199
								EF2	208	0.000111												TRIM9	208	0.000206
								UBE2W	209	0.000115												SIR2	209	0.00022
								PRDX1	210	0.000115												BCAS1	210	0.000221
								SYNJ1	211	0.000118												RS2	211	0.000223
								RL37A	212	0.000119												DYN1	212	0.000224
								PP1B	213	0.000119												NEUG	213	0.000224
								FAK2	214	0.00012												PRDX5	214	0.000225
								F120C	215	0.000122												PURA	215	0.000232
								MARK2	216	0.000122												MECP2	216	0.000235
								ODPA	217	0.000125												PP2BA	217	0.000239
								DTNA	218	0.000126												2AAA	218	0.000247
								MYEF2	219	0.000126												EAA2	219	0.000249
								MARK1	220	0.000126												BSN	220	0.000254
								IQCB1	221	0.000126												DDX5	221	0.000254
								WDR47	222	0.000127												CADH2	222	0.000256
								RBM39	223	0.000129												AP2M1	223	0.000256
								ELAV2	224	0.000131												PKP4	224	0.000258
								H2AW	225	0.000131												DCLK1	225	0.000258
								SMC1A	226	0.000132												NFM	226	0.000259
								ALG2	227	0.000133												MYPR	227	0.000266
								WDR7	228	0.000134												MAGI3	228	0.000272
								2ABA	229	0.000135												SMC3	229	0.000277
								EFTU	230	0.000137												RMXL1	230	0.000284
								HABP4	231	0.000141												AP2A1	231	0.000289
								COG6	232	0.000141												VATD	232	0.000295
								H11	233	0.000144												PDIP3	233	0.000295
								RL36	234	0.000147												1433G	234	0.000305
								SMRC2	235	0.000147												H12	235	0.000307
								NSF	236	0.000147												CENPV	236	0.000315
								RS7	237	0.000152												F13A	237	0.000317
								RS28	238	0.000152												PCBP1	238	0.00033
								PCBP2	239	0.000155												NLGN2	239	0.000352
								GRP75	240	0.000155												RL3	240	0.000358
								SF3B3	241	0.000156												NFL	241	0.000362
								HEMH	242	0.000156												INSY1	242	0.000363
								NLGN2	243	0.000157												TBB5	243	0.000375
								KPYM	244	0.000157												ZC21A	244	0.000384
								PCLO	245	0.000157												CTNB1	245	0.000385
								RL35A	246	0.000164												TANC2	246	0.000392
								ILF2	247	0.000167												HNRPL	247	0.000404
								LYRIC	248	0.00017												IQEC2	248	0.000406
								CTNA2	249	0.000172												HS105	249	0.000429
								TAOK2	250	0.000176												RS11	250	0.000429
								FXR1	251	0.000178												TBB3	251	0.000438
								CAMP3	252	0.000179												CTNA2	252	0.000441
								CAZA2	253	0.00018												TRA2A	253	0.000463
								GSK3B	254	0.000181												TBB4A	254	0.000468
								NDUA4	255	0.000182												EMAL2	255	0.00047
								TBB2B	256	0.000184												GBRA1	256	0.000472
								ASSY	257	0.000184												1433Z	257	0.000479
								MA7D1	258	0.000185												ROA1	258	0.000491
								CTNB1	259	0.000187												MAP4	259	0.000499
								HNRDL	260	0.000188												ADT1	260	0.000511
								RL19	261	0.000189												SYGP1	261	0.00055
								EDC4	262	0.000189												EF1A1	262	0.000556
								RS17	263	0.00019												MASP1	263	0.000557
								PTN	264	0.00019												CLH1	264	0.000635
								MYL6	265	0.000193												1433T	265	0.000641
								RL26	266	0.000195												GLNA	266	0.00067
								VP33A	267	0.000197												HNRPK	267	0.000697
								RBMX	268	0.000198												HNRPU	268	0.000741
								SKT	269	0.0002												MTAP2	269	0.000793
								TPIS	270	0.000201												ROA3	270	0.000854
								GBRA1	271	0.000203												AT1A3	271	0.000877
								VPS16	272	0.000203												H2AY	272	0.000897
								CPSF5	273	0.000204												CN37	273	0.0009
								ROA0	274	0.000206												CP131	274	0.00091
								E41L3	275	0.000207												PROF2	275	0.000918
								SIR2	276	0.000208												ACTS	276	0.000925
								RL31	277	0.000209												GLRA2	277	0.00095
								RS15	278	0.000211												SPTB2	278	0.000958
								PFKAL	279	0.000211												HNRH1	279	0.001006
								PRDX5	280	0.000219												AINX	280	0.001043
								MK01	281	0.00022												HPHL1	281	0.001104
								DYN1	282	0.000221												DPYL2	282	0.001177
								NEUG	283	0.000228												RS13	283	0.001278
								INSY1	284	0.000229												GLRB	284	0.001443
								TRI46	285	0.000233												BIP	285	0.001525
								ZC21A	286	0.000235												DYL2	286	0.00153
								1433E	287	0.000235												SRCN1	287	0.001583
								RL24	288	0.000236												KCC2B	288	0.001769
								CPSF7	289	0.000238												SPTN1	289	0.001808
								GPX4	290	0.000239												CBLN4	290	0.001896
								1433F	291	0.000239												ARHG9	291	0.001931
								AT1B1	292	0.000242												TBA1B	292	0.001998
								TAU	293	0.000242												RS4X	293	0.002047
								MAGI3	294	0.000245												ADT2	294	0.002099
								MP2K7	295	0.000249												ATAD3	295	0.002344
								GCP4	296	0.000252												CS044	296	0.002952
								CSK21	297	0.000252												MAP6	297	0.003017
								NOP56	298	0.000253												ARHG2	298	0.003235
								PAIRB	299	0.000259												FUBP2	299	0.00353
								RL27A	300	0.00026												TBB2A	300	0.003848
								RL32	301	0.000262												TRIM2	301	0.004318
								RL21	302	0.000265												HSP7C	302	0.006504
								LMNB1	303	0.000269												TBA4A	303	0.006587
								SYNPO	304	0.000271												KCC2A	304	0.009092
								CYFP2	305	0.000271												G3P	305	0.010021
								IQEC2	306	0.000272												TRIM3	306	0.011002
								RL28	307	0.000277												TBB4B	307	0.014694
								HNRH2	308	0.000279												DYL1	308	0.015182
								RTCB	309	0.000279												ENAH	309	0.015594
								ANM3	310	0.000281												RHG32	310	0.015643
								SRSF3	311	0.000288												IQEC3	311	0.023338
								DDX17	312	0.000288												ACTB	312	0.024365
								GNAO	313	0.000289												MBP	313	0.03042
								H15	314	0.000295												CCAR2	314	0.067712
								PCBP1	315	0.000298												GEPH	315	1
								RL34	316	0.000298												GBRB2	68		2.28e-05
								STXB1	317	0.000299												GBRA2	100		3.44e-05
								RL15	318	0.000301												EVL	108		3.96e-05
								RL13A	319	0.000303												DTNA	157		8.25e-05
								C2D1A	320	0.000306												GBRB3	193		0.000159
								RL23A	321	0.000315												NLGN2	239		0.000352
								RL3	322	0.000323												GBRA1	256		0.000472
								RO52	323	0.000323												GLRB	284		0.001443
								EAA2	324	0.000328												DYL2	286		0.00153
								DDX1	325	0.00033												ARHG9	291		0.001931
								FBRL	326	0.000332												DYL1	308		0.015182
								PKP4	327	0.000333												ENAH	309		0.015594
								NOP58	328	0.000335												IQEC3	311		0.023338
								DDX28	329	0.000337												GEPH	315		1
								LMNA	330	0.000338
								RL23	331	0.000344
								BBS5	332	0.000345
								AAR2	333	0.00035
								DREB	334	0.000352
								HTRA1	335	0.000354
								1433S	336	0.000355
								RL29	337	0.000356
								TFAM	338	0.000357
								MZT2	339	0.000358
								GBRB3	340	0.000372
								RL18A	341	0.000382
								BCAS1	342	0.000384
								SAFB1	343	0.000393
								PRP19	344	0.000396
								HS90B	345	0.000399
								ANK2	346	0.000401
								GCP6	347	0.000403
								RS27A	348	0.000405
								RS24	349	0.000406
								CAMKV	350	0.00041
								MYPR	351	0.000411
								ACTG	352	0.000428
								MYH10	353	0.000428
								DDX6	354	0.00043
								1433G	355	0.00044
								ZN638	356	0.000456
								HS105	357	0.000456
								GLRA2	358	0.000459
								RL8	359	0.000478
								HS71A	360	0.000478
								RL11	361	0.000479
								RLA2	362	0.000489
								G3BP1	363	0.000489
								ANR63	364	0.000489
								RL14	365	0.00049
								PP2BA	366	0.000495
								RS14	367	0.000496
								HNRPQ	368	0.000501
								CENPV	369	0.000506
								RL17	370	0.000509
								HNRPD	371	0.000514
								RL35	372	0.000539
								RL27	373	0.000541
								KIF2A	374	0.000543
								F120A	375	0.000546
								MAP4	376	0.000553
								NFM	377	0.000554
								RLA0	378	0.000563
								ELAV1	379	0.000564
								HNRL2	380	0.000572
								RL30	381	0.000578
								RS23	382	0.000583
								RL12	383	0.000589
								GRP1	384	0.00059
								CP131	385	0.000591
								RS20	386	0.000598
								ANM1	387	0.000613
								ARHG2	388	0.000633
								MASP1	389	0.000642
								MAP7	390	0.000649
								HNRPM	391	0.00065
								ADT1	392	0.000655
								H12	393	0.000657
								1433Z	394	0.000659
								RS19	395	0.000668
								RS25	396	0.000692
								ARHG9	397	0.000697
								H2AV	398	0.000698
								RL13	399	0.000708
								GLNA	400	0.000709
								TTC8	401	0.00071
								PSIP1	402	0.00075
								MECP2	403	0.000752
								ROA1	404	0.000756
								BBS7	405	0.000763
								HNRPC	406	0.000768
								PFKAM	407	0.00082
								RL10A	408	0.000861
								BBS4	409	0.000861
								KHDR1	410	0.000874
								CS044	411	0.000896
								RL10	412	0.000898
								PTHB1	413	0.000907
								MYO5A	414	0.000938
								RS9	415	0.000939
								NFL	416	0.00095
								RL6	417	0.000953
								TBA1C	418	0.000962
								RS6	419	0.000971
								BSN	420	0.00098
								BBS1	421	0.001028
								H13	422	0.001037
								DHX9	423	0.001042
								PROF2	424	0.001054
								FUS	425	0.00107
								DDX3X	426	0.001094
								PFKAP	427	0.001113
								AP2S1	428	0.001114
								RL7	429	0.001142
								PURB	430	0.00116
								MATR3	431	0.001172
								EF1A1	432	0.001197
								GLRB	433	0.001201
								PABP1	434	0.001205
								CMC1	435	0.001214
								RL18	436	0.001219
								1433T	437	0.001226
								AT1A3	438	0.00126
								RL4	439	0.001267
								RL7A	440	0.001281
								H2AY	441	0.001282
								BIP	442	0.001341
								AP2A2	443	0.001383
								RS8	444	0.001403
								GLSK	445	0.001447
								MTAP2	446	0.00145
								TRI35	447	0.001526
								CE290	448	0.001538
								RS3A	449	0.001605
								BBS2	450	0.001651
								MLF2	451	0.001661
								HNRPL	452	0.001738
								GFAP	453	0.001755
								RS11	454	0.001789
								RS5	455	0.001819
								RS16	456	0.00187
								CCAR2	457	0.00194
								TBB4A	458	0.002107
								KCC2B	459	0.002117
								DPYL2	460	0.002154
								HNRH1	461	0.002164
								RS3	462	0.002217
								JAK1	463	0.002232
								RS4X	464	0.002302
								AP2B1	465	0.002343
								TBB3	466	0.002404
								TBB5	467	0.002423
								ATAD3	468	0.002484
								H2AJ	469	0.002552
								PDIP3	470	0.002564
								ROA3	471	0.002571
								AINX	472	0.002587
								RS18	473	0.002615
								SFPQ	474	0.002623
								FUBP2	475	0.002664
								SPTB2	476	0.002709
								FRIH	477	0.002723
								CC177	478	0.002786
								CLH1	479	0.00285
								HNRPK	480	0.003083
								TBG1	481	0.003108
								CN37	482	0.003184
								GCP3	483	0.003234
								TRIM3	484	0.003496
								GCP2	485	0.003527
								RS2	486	0.003589
								DYL2	487	0.003614
								SYNC	488	0.003889
								BRSK1	489	0.004
								SPTN1	490	0.004086
								AP2M1	491	0.004301
								ROA2	492	0.004303
								RPOM	493	0.004543
								SRCN1	494	0.00457
								FRIL1	495	0.004704
								TBA1B	496	0.004914
								RMXL1	497	0.004997
								ERC2	498	0.005479
								MAP6	499	0.005982
								CH60	500	0.006253
								PURA	501	0.006282
								G3BP2	502	0.006528
								AP2A1	503	0.006797
								RS13	504	0.006842
								CHTOP	505	0.007113
								H14	506	0.007265
								CAPR1	507	0.007439
								ADT2	508	0.00744
								LS14A	509	0.008561
								HSP7C	510	0.010136
								DDX5	511	0.010466
								TBB2A	512	0.011267
								ENAH	513	0.012614
								MOR2A	514	0.013056
								MAP1A	515	0.013322
								RHG32	516	0.014581
								KCC2A	517	0.015335
								THOC4	518	0.015696
								G3P	519	0.016203
								DYL1	520	0.017626
								AP1G1	521	0.018113
								AP1M1	522	0.018376
								TBA4A	523	0.018928
								AP1B1	524	0.0202
								BCLF1	525	0.023225
								HNRPU	526	0.024225
								IQEC3	527	0.024249
								MAP1B	528	0.029338
								EWS	529	0.035081
								H2B1C	530	0.037227
								TR150	531	0.040185
								ACTB	532	0.041756
								TBB4B	533	0.042388
								ERH	534	0.044316
								MBP	535	0.150262
								GEPH	536	1
								GBRA2	32		1.78e-05
								EVL	56		2.48e-05
								GBRG2	64		2.77e-05
								DTNA	218		0.000126
								NLGN2	243		0.000157
								GBRA1	271		0.000203
								GBRB3	340		0.000372
								ARHG9	397		0.000697
								GLRB	433		0.001201
								DYL2	487		0.003614
								ENAH	513		0.012614
								DYL1	520		0.017626
								IQEC3	527		0.024249
								GEPH	536		1
