# Supplementary material for: A DARPin-based molecular toolset to probe gephyrin and inhibitory synapse biology
Source: eLife journal article supplement (doi:10.7554/elife.80895), 2022-10-31
Supplement: supp [file elife-80895-supp-v1.zip › elife_poa_e80895_Figure_6_source_data_1.xlsx]

## Sheet: Panel A
	Figure 6 Source Data 1 - Data used to generate the heat map of select interactor ontologies in Figure 6 panel A.
	Abundance relative to gephyrin (Log2 FC of row average for heat mapt display)
	TopProtein ProteinName	27B3.R1	27B3.R2	27B3.R3	27F3.R1	27F3.R2	27F3.R3	27G2.R1	27G2.R2	27G2.R3	Uniprot		Ontology category			Ensemble ID	Gene name	Description
	AINX	0.772064	1.03113	1.09828	-1.90169	-2.04945	-2.12064	-0.502525	-0.104083	-0.449576	P46660		Cytoskeletal protein and adaptors			ENSMUSG00000034336	Ina	internexin neuronal intermediate filament protein, alpha [Source:MGI Symbol;Acc:MGI:96568]
	AP2A1	1.32862	1.61552	1.49646	-3.86569	-2.94138	-4.49696	-3.02469	-2.6686	-3.65435	P17426		Cytoskeletal protein and adaptors			ENSMUSG00000060279	Ap2a1	adaptor-related protein complex 2, alpha 1 subunit [Source:MGI Symbol;Acc:MGI:101921]
	ARHG9	-1.26588	-0.500879	-0.312762	-0.558508	-0.752204	-1.48088	0.85541	1.09583	0.579933	Q3UTH8		Signalling scaffold			ENSMUSG00000025656	Arhgef9	CDC42 guanine nucleotide exchange factor (GEF) 9 [Source:MGI Symbol;Acc:MGI:2442233]
	BIP	0.63712	0.108649	0.248389	-2.30401	-1.29689	-1.44544	0.135076	0.635757	0.632357	P20029		Structure and trafficking			ENSMUSG00000026864	Hspa5	heat shock protein 5 [Source:MGI Symbol;Acc:MGI:95835]
	BSN	1.36878	1.11251	1.01709	-2.20265	-2.81845	-3.26953	-0.505031	-0.81218	-1.0158	O88737		Signalling scaffold			ENSMUSG00000032589	Bsn	bassoon [Source:MGI Symbol;Acc:MGI:1277955]
	CN37	0.666851	1.24415	1.2153	-1.9808	-1.21296	-1.8849	-1.06132	-0.370884	-0.960954	P16330		Metabolism			ENSMUSG00000006782	Cnp	2',3'-cyclic nucleotide 3' phosphodiesterase [Source:MGI Symbol;Acc:MGI:88437]
	CS044	-0.783872	-2.22819	-0.680588	-0.393242	0.641899	-0.384766	0.0463783	-0.114418	1.34354	Q922C1		Other			ENSMUSG00000052794	1700030K09Rik	RIKEN cDNA 1700030K09 gene [Source:MGI Symbol;Acc:MGI:1919504]
	DDX3X	0.411994	1.21744	2.21878	-5.59831	-4.78946	-3.45247	-3.4014	-1.88511	-2.50952	Q62167		mRNA regulation			ENSMUSG00000000787	Ddx3x	DEAD box helicase 3, X-linked [Source:MGI Symbol;Acc:MGI:103064]
	DDX5	1.39539	1.6774	1.52377	-5.31603	-5.44241	-4.8099	-3.83684	-3.46303	-4.29119	Q61656		mRNA regulation			None	Ddx5	Probable ATP-dependent RNA helicase DDX5
	DPYL2	0.506762	0.536375	0.890136	-0.548012	-1.1656	-0.831664	-0.28416	-0.0421866	-0.337436	O08553		Cytoskeletal protein and adaptors			ENSMUSG00000022048	Dpysl2	dihydropyrimidinase-like 2 [Source:MGI Symbol;Acc:MGI:1349763]
	DYL1	0.165969	0.241082	0.242483	-0.259143	-0.145445	-0.334913	-0.153441	0.17459	-0.0695865	P63168		Cytoskeletal protein and adaptors			ENSMUSG00000009013	Dynll1	dynein light chain LC8-type 1 [Source:MGI Symbol;Acc:MGI:1861457]
	DYL2	0.473435	0.880439	0.327663	-0.176987	-0.131133	-0.268549	-0.801049	-0.406623	-0.837693	Q9D0M5		Cytoskeletal protein and adaptors			ENSMUSG00000020483	Dynll2	dynein light chain LC8-type 2 [Source:MGI Symbol;Acc:MGI:1915347]
	EF1A1	-0.656948	0.425256	0.347199	0.442632	0.71603	0.332502	-1.68385	-0.589043	-0.960397	P10126		mRNA regulation			ENSMUSG00000037742	Eef1a1	eukaryotic translation elongation factor 1 alpha 1 [Source:MGI Symbol;Acc:MGI:1096881]
	ENAH	0.091016	-0.0355133	0.0300093	-0.622762	-0.478664	-0.219099	0.0245944	0.439702	0.420605	Q03173		Cytoskeletal protein and adaptors			ENSMUSG00000022995	Enah	ENAH actin regulator [Source:MGI Symbol;Acc:MGI:108360]
	FUBP2	-0.0874589	0.207109	0.409902	-1.49172	-1.72914	-2.22112	0.978076	0.250487	0.627339	Q3U0V1		mRNA regulation			ENSMUSG00000007670	Khsrp	KH-type splicing regulatory protein [Source:MGI Symbol;Acc:MGI:1336214]
	GLRB	0.21442	0.235958	0.148971	-1.02554	-1.06501	-1.03192	0.28302	0.575809	0.472786	P48168		Ion channels and transport			ENSMUSG00000028020	Glrb	glycine receptor, beta subunit [Source:MGI Symbol;Acc:MGI:95751]
	HNRH1	0.704952	0.690968	1.12456	-2.50041	-0.895702	-1.62243	-0.232402	-0.0745404	-0.443527	O35737		mRNA regulation			ENSMUSG00000007850	Hnrnph1	heterogeneous nuclear ribonucleoprotein H1 [Source:MGI Symbol;Acc:MGI:1891925]
	HNRPU	1.48769	1.48699	1.54887	-4.84272	-3.71909	-3.29285	-4.10861	-3.49869	-3.21844	Q8VEK3		mRNA regulation			ENSMUSG00000039630	Hnrnpu	heterogeneous nuclear ribonucleoprotein U [Source:MGI Symbol;Acc:MGI:1858195]
	HPHL1	-3.18621	-2.98768	-3.54495	-4.82211	-4.11872	-4.2362	1.36521	1.47934	1.6636	Q3V1H3		Metabolism			ENSMUSG00000031936	Hephl1	hephaestin-like 1 [Source:MGI Symbol;Acc:MGI:2685355]
	HSP7C	0.259424	0.432369	0.456267	-0.324077	-0.244589	-0.129816	-0.259287	-0.218043	-0.269652	P63017		Structure and trafficking			ENSMUSG00000015656	Hspa8	heat shock protein 8 [Source:MGI Symbol;Acc:MGI:105384]
	IQEC3	-0.351791	-0.334047	-0.121008	0.421373	0.423357	0.51487	-0.436635	-0.303732	-0.242269	Q3TES0		Signalling scaffold			ENSMUSG00000040797	Iqsec3	IQ motif and Sec7 domain 3 [Source:MGI Symbol;Acc:MGI:2677208]
	KCC2A	0.622852	0.552182	0.696052	-1.51405	-0.78599	-0.554927	-0.0219335	-0.28402	-0.0638103	P11798		Phosphorylation regulation			ENSMUSG00000024617	Camk2a	calcium/calmodulin-dependent protein kinase II alpha [Source:MGI Symbol;Acc:MGI:88256]
	KCC2B	0.441721	0.527961	0.370323	-1.14779	-0.956292	-0.810345	-0.0703078	0.275527	0.271941	P28652		Phosphorylation regulation			ENSMUSG00000057897	Camk2b	calcium/calmodulin-dependent protein kinase II, beta [Source:MGI Symbol;Acc:MGI:88257]
	KHDR1	1.15838	1.49605	1.32703	-3.02584	-1.95717	-2.64905	-2.06704	-1.77876	-1.44004	Q60749		mRNA regulation			ENSMUSG00000028790	Khdrbs1	KH domain containing, RNA binding, signal transduction associated 1 [Source:MGI Symbol;Acc:MGI:893579]
	MAP6	0.743127	0.696759	0.911391	-1.53786	-0.969295	-1.34317	-0.471548	-0.0587908	-0.161785	Q7TSJ2		Cytoskeletal protein and adaptors			ENSMUSG00000055407	Map6	microtubule-associated protein 6 [Source:MGI Symbol;Acc:MGI:1201690]
	NFL	1.11723	0.905647	0.968926	-1.42255	-2.82871	-1.78189	-1.09069	-0.0599054	-0.383719	P08551		Cytoskeletal protein and adaptors			ENSMUSG00000022055	Nefl	neurofilament, light polypeptide [Source:MGI Symbol;Acc:MGI:97313]
	PFKAP	0.956637	1.93306	1.12084	-6.01578	-4.86362	-6.90411	-1.45475	-1.77008	-1.5159	Q9WUA3		Metabolism			ENSMUSG00000021196	Pfkp	phosphofructokinase, platelet [Source:MGI Symbol;Acc:MGI:1891833]
	RHG32	0.377778	0.419979	0.468583	-2.40001	-2.00744	-2.09961	0.47408	0.576815	0.512905	Q811P8		Structure and trafficking			ENSMUSG00000041444	Arhgap32	Rho GTPase activating protein 32 [Source:MGI Symbol;Acc:MGI:2450166]
	RMXL1	1.47141	1.41876	1.41202	-3.25262	-2.27967	-2.93134	-3.08725	-2.75055	-2.44059	Q91VM5		mRNA regulation			ENSMUSG00000037070	Rbmxl1	RNA binding motif protein, X-linked like-1 [Source:MGI Symbol;Acc:MGI:1343045]
	RS13	1.37465	1.3957	1.24743	-8.12277	-8.38039	-8.73201	-1.38861	-0.840944	-1.14415	P62301		Ribosome			ENSMUSG00000090862	Rps13	ribosomal protein S13 [Source:MGI Symbol;Acc:MGI:1915302]
	RS2	1.41374	1.4838	1.58063	-6.75946	-6.25225	-6.42791	-2.96692	-2.31296	-2.43616	P25444		Ribosome			ENSMUSG00000044533	Rps2	ribosomal protein S2 [Source:MGI Symbol;Acc:MGI:105110]
	RS3	1.29501	1.18923	1.85662	-7.56615	-6.15938	-5.92912	-2.25281	-2.03536	-2.6907	P62908		Ribosome			ENSMUSG00000030744	Rps3	ribosomal protein S3 [Source:MGI Symbol;Acc:MGI:1350917]
	SRCN1	0.998751	0.999647	1.17961	-3.24169	-2.11288	-2.0143	-0.627473	-0.226582	-0.620026	Q9QWI6		Phosphorylation regulation			None	Srcin1	SRC kinase signaling inhibitor 1
	TBA1B	0.84814	0.878279	0.802074	-1.21131	-0.859219	-1.08744	-0.62293	-0.118314	-0.752206	P05213		Cytoskeletal protein and adaptors			ENSMUSG00000023004	Tuba1b	tubulin, alpha 1B [Source:MGI Symbol;Acc:MGI:107804]
	TBB2A	0.883492	1.147	1.01074	-1.8523	-1.83495	-1.78835	-0.546808	-0.14869	-1.02231	Q7TMM9		Cytoskeletal protein and adaptors			ENSMUSG00000058672	Tubb2a	tubulin, beta 2A class IIA [Source:MGI Symbol;Acc:MGI:107861]
	TBB3	1.74653	0.942697	0.972975	-3.06819	-2.14554	-2.35209	-2.47703	-0.398214	-1.83657	Q9ERD7		Cytoskeletal protein and adaptors			ENSMUSG00000062380	Tubb3	tubulin, beta 3 class III [Source:MGI Symbol;Acc:MGI:107813]
	TBB4A	0.892533	1.02787	1.21071	-0.849258	-1.08767	-1.85116	-0.248404	-1.46354	-1.82192	Q9D6F9		Cytoskeletal protein and adaptors			ENSMUSG00000062591	Tubb4a	tubulin, beta 4A class IVA [Source:MGI Symbol;Acc:MGI:107848]
	TBB4B	1.02755	0.965205	0.907126	-1.30196	-1.4643	-1.50205	-0.673488	-0.202546	-0.952472	P68372		Cytoskeletal protein and adaptors			ENSMUSG00000036752	Tubb4b	tubulin, beta 4B class IVB [Source:MGI Symbol;Acc:MGI:1915472]
	TBB5	1.14096	1.26146	0.997316	-2.55495	-0.652619	-0.700536	-2.55805	-2.42217	-0.682608	P99024		Cytoskeletal protein and adaptors			ENSMUSG00000001525	Tubb5	tubulin, beta 5 class I [Source:MGI Symbol;Acc:MGI:107812]
