# Supplementary material for: A DARPin-based molecular toolset to probe gephyrin and inhibitory synapse biology
Source: eLife journal article supplement (doi:10.7554/elife.80895), 2022-10-31
Supplement: supp [file elife-80895-supp-v1.zip › elife_poa_e80895_Figure_6_source_data_2.xlsx]

## Sheet: Panel
	Figure 6 - Source Data 2: Interactors with significantly different abundances used to generate the hear map in Figure 6 - Supplement 2.
	Abundance relative to gephyrin											Statistical analysis (multiple comparisons)														Ontology								Log2FC of row average (used to generate heat map)
												Significant?			Q value							Highest in:
	TopProtein ProteinName	27B3.R1	27B3.R2	27B3.R3	27F3.R1	27F3.R2	27F3.R3	27G2.R1	27G2.R2	27G2.R3		27F3 vs. 27B3	27F3 vs. 27G2	27B3 vs. 27G2	27F3 vs. 27B3	27F3 vs. 27G2	27B3 vs. 27G2		Regulated (1=yes, 0=no)			27F3	27B3	27G2		Canonical Interactor?	Ontology Category		Ensembl ID	Gene name	description			27B3.R1	27B3.R2	27B3.R3	27F3.R1	27F3.R2	27F3.R3	27G2.R1	27G2.R2	27G2.R3
	1433F	0.000226081	0.000266246	0.00022326	6.47664e-05	7.85388e-05	4.03035e-05	0.000187764	0.000161591	0.000121029		No	No	No	0.8518	0.8518	0.8518		0			0	1	0			Signalling scaffold		ENSMUSG00000018965	Ywhah	tyrosine 3-monooxygenase/tryptophan 5-monooxygenase activation protein, eta polypeptide [Source:MGI Symbol;Acc:MGI:109194]			0.571105	0.807025	0.552985	-1.23242	-0.954259	-1.91676	0.30318	0.0866107	-0.330379
	1433G	0.000427445	0.000436174	0.000454174	0.000175679	0.000151276	0.000179491	0.000249627	0.000368585	0.000282798		No	No	No	0.7332	0.7332	0.7332		0			0	1	0			Signalling scaffold		ENSMUSG00000051391	Ywhag	tyrosine 3-monooxygenase/tryptophan 5-monooxygenase activation protein, gamma polypeptide [Source:MGI Symbol;Acc:MGI:108109]			0.497348	0.526512	0.584854	-0.785452	-1.00121	-0.754476	-0.278618	0.283607	-0.0986185
	1433S	0.000339717	0.000300557	0.000421011	0.00010473	9.05318e-05	7.87342e-05	9.49123e-05	0.000108709	9.76375e-05		No	No	No	0.7193	0.7193	>0,9999		0			0	1	0			Signalling scaffold		ENSMUSG00000047281	Sfn	stratifin [Source:MGI Symbol;Acc:MGI:1891831]			0.90168	0.724989	1.2112	-0.795972	-1.00615	-1.20759	-0.937984	-0.74218	-0.897145
	1433T	0.00113067	0.00119949	0.00133031	0.000583344	0.000672979	0.000255767	0.00100622	0.000585466	0.000427462		No	No	No	0.1127	0.1705	0.6514		0			0	1	0			Signalling scaffold		ENSMUSG00000076432	Ywhaq	tyrosine 3-monooxygenase/tryptophan 5-monooxygenase activation protein theta [Source:MGI Symbol;Acc:MGI:891963]			0.50077	0.586015	0.735352	-0.45399	-0.247777	-1.64351	0.332534	-0.448752	-0.902544
	2ABA	0.000162654	0.000142743	0.000103925	5.71507e-05	8.20239e-05	6.11821e-05	2.77174e-05	0.000152237	1.21857e-05		No	No	No	0.8374	0.8309	0.9934		0			0	1	0			Phosphorylation regulation		ENSMUSG00000022052	Ppp2r2a	protein phosphatase 2, regulatory subunit B, alpha [Source:MGI Symbol;Acc:MGI:1919228]			0.868458	0.68007	0.22219	-0.640507	-0.119235	-0.54217	-1.68449	0.772966	-2.8701
	ACTN1	1.03151e-05	5.30567e-05	4.37485e-05	1.36548e-05	1.5233e-05	4.44011e-06	3.65826e-05	7.28812e-05	3.19798e-05		No	No	No	0.9424	0.9731	0.9157		0			0	0	1			Cytoskeletal protein and adaptors		ENSMUSG00000015143	Actn1	actinin, alpha 1 [Source:MGI Symbol;Acc:MGI:2137706]			-1.60238	0.76039	0.482089	-1.19773	-1.03994	-2.81848	0.224011	1.2184	0.0300145
	AGAP2	8.46981e-05	9.33228e-05	8.40988e-05	2.2633e-05	9.40572e-06	3.0297e-05	4.46588e-05	9.6124e-06	2.29265e-05		No	No	No	0.8449	0.8564	0.9884		0			0	1	0			Signalling scaffold		ENSMUSG00000025422	Agap2	ArfGAP with GTPase domain, ankyrin repeat and PH domain 2 [Source:MGI Symbol;Acc:MGI:3580016]			0.924377	1.06428	0.914132	-0.979527	-2.24634	-0.55878	0.000992854	-2.21498	-0.960935
	AINX	0.00223188	0.00267089	0.00279815	0.000349776	0.000315727	0.000300525	0.00092253	0.00121597	0.000957017		Yes	Yes	Yes	<0,0001	<0,0001	0.0374		1			0	1	0			Cytoskeletal protein and adaptors		ENSMUSG00000034336	Ina	internexin neuronal intermediate filament protein, alpha [Source:MGI Symbol;Acc:MGI:96568]			0.772064	1.03113	1.09828	-1.90169	-2.04945	-2.12064	-0.502525	-0.104083	-0.449576
	AJM1	6.59071e-05	9.09851e-05	9.15832e-05	1.79791e-05	9.09616e-06	1.41386e-05	8.4891e-05	0.000257984	0.000195077		No	No	No	0.8392	0.7769	0.6268		0			0	0	1			Synaptic adhesion		ENSMUSG00000029419	Ajm1	apical junction component 1 [Source:MGI Symbol;Acc:MGI:2685842]			-0.480574	-0.0153777	-0.00592533	-2.35469	-3.33768	-2.70136	-0.115396	1.4882	1.08496
	ANK2	0.00019769	0.000577909	0.000393341	6.64908e-05	7.6202e-05	3.53839e-05	0.000145996	0.000303893	0.000123916		No	No	No	0.3322	0.5603	0.6984		0			0	1	0			Signalling scaffold		ENSMUSG00000032826	Ank2	ankyrin 2, brain [Source:MGI Symbol;Acc:MGI:88025]			-0.11049	1.43712	0.882054	-1.6825	-1.48583	-2.59256	-0.547796	0.509838	-0.78437
	AP2A1	0.00606295	0.0073969	0.00681094	0.000165593	0.000314256	0.000106907	0.000296624	0.000379663	0.000191716		Yes	Yes	No	<0,0001	<0,0001	0.7825		1			0	1	0			Cytoskeletal protein and adaptors		ENSMUSG00000060279	Ap2a1	adaptor-related protein complex 2, alpha 1 subunit [Source:MGI Symbol;Acc:MGI:101921]			1.32862	1.61552	1.49646	-3.86569	-2.94138	-4.49696	-3.02469	-2.6686	-3.65435
	ARHG9	0.000442095	0.000751283	0.000855919	0.000721864	0.000631171	0.000380886	0.00192348	0.00227227	0.00158913		No	Yes	Yes	0.2652	0.0001	<0,0001		1			0	0	1		Yes	Signalling scaffold		ENSMUSG00000025656	Arhgef9	CDC42 guanine nucleotide exchange factor (GEF) 9 [Source:MGI Symbol;Acc:MGI:2442233]			-1.26588	-0.500879	-0.312762	-0.558508	-0.752204	-1.48088	0.85541	1.09583	0.579933
	ARPC3	3.85054e-05	5.10611e-05	4.31891e-05	1.29133e-05	1.60422e-05	1.8466e-05	1.74858e-05	1.53939e-05	2.22934e-05		No	No	No	>0,9999	>0,9999	>0,9999		0			0	1	0			Cytoskeletal protein and adaptors		ENSMUSG00000029465	Arpc3	actin related protein 2/3 complex, subunit 3 [Source:MGI Symbol;Acc:MGI:1928375]			0.55825	0.965414	0.723854	-1.01796	-0.704942	-0.501944	-0.580629	-0.764455	-0.230192
	ASGL1	3.03462e-05	4.19462e-05	3.09204e-05	9.22019e-06	2.30688e-05	1.99598e-05	3.91394e-05	4.16002e-05	2.31399e-05		No	No	No	>0,9999	>0,9999	>0,9999		0			0	0	1			Metabolism		ENSMUSG00000024654	Asrgl1	asparaginase like 1 [Source:MGI Symbol;Acc:MGI:1913764]			0.0746616	0.541685	0.101707	-1.64399	-0.320913	-0.529756	0.441769	0.529737	-0.316471
	BCAS1	0.000469601	0.000372113	0.000325446	0.000207445	0.000225792	0.000216514	0.00024644	0.000156654	0.000266621		No	No	No	0.9869	0.9869	>0,9999		0			0	1	0			Other		ENSMUSG00000013523	Bcas1	brain enriched myelin associated protein 1 [Source:MGI Symbol;Acc:MGI:1924210]			0.765242	0.429547	0.236224	-0.413464	-0.291196	-0.351735	-0.164954	-0.81861	-0.0514011
	BIP	0.00165897	0.00115014	0.00126712	0.000216008	0.000434153	0.000391674	0.0011714	0.0016574	0.0016535		Yes	No	Yes	0.0016	0.2421	0.0008		1			0	0	1			Structure and trafficking		ENSMUSG00000026864	Hspa5	heat shock protein 5 [Source:MGI Symbol;Acc:MGI:95835]			0.63712	0.108649	0.248389	-2.30401	-1.29689	-1.44544	0.135076	0.635757	0.632357
	BSN	0.00113143	0.000947292	0.000886663	9.5174e-05	6.21078e-05	4.54315e-05	0.000308712	0.000249513	0.00021667		Yes	Yes	No	0.0147	0.034	0.4023		1			0	1	0			Signalling scaffold		ENSMUSG00000032589	Bsn	bassoon [Source:MGI Symbol;Acc:MGI:1277955]			1.36878	1.11251	1.01709	-2.20265	-2.81845	-3.26953	-0.505031	-0.81218	-1.0158
	CADH2	9.19324e-05	8.61197e-05	8.46784e-05	3.14507e-05	2.55083e-05	2.41272e-05	0.000284737	0.000271825	0.000218751		No	No	No	0.9018	0.9018	0.9018		0			0	0	1			Synaptic adhesion		ENSMUSG00000024304	Cdh2	cadherin 2 [Source:MGI Symbol;Acc:MGI:88355]			-0.435734	-0.529964	-0.554314	-1.98321	-2.28534	-2.36565	1.19525	1.1283	0.814907
	CAMKV	0.000417817	0.000495268	0.00031856	4.80865e-05	6.14243e-05	2.70796e-05	0.000126682	3.52882e-05	2.99107e-05		No	No	No	0.4865	0.4865	>0,9999		0			0	1	0			Phosphorylation regulation		ENSMUSG00000032936	Camkv	CaM kinase-like vesicle-associated [Source:MGI Symbol;Acc:MGI:2384296]			1.26921	1.51455	0.877908	-1.84995	-1.49678	-2.67838	-0.452444	-2.2964	-2.53492
	CN37	0.00238179	0.00355375	0.0034834	0.000380085	0.00064718	0.00040621	0.000718905	0.00116015	0.0007707		Yes	Yes	No	<0,0001	<0,0001	0.0818		1			0	1	0			Metabolism		ENSMUSG00000006782	Cnp	2',3'-cyclic nucleotide 3' phosphodiesterase [Source:MGI Symbol;Acc:MGI:88437]			0.666851	1.24415	1.2153	-1.9808	-1.21296	-1.8849	-1.06132	-0.370884	-0.960954
	CNKR2	8.70237e-05	9.10295e-05	8.90569e-05	6.77922e-06	1.60287e-05	7.32461e-06	1.64546e-05	3.86908e-05	3.44518e-05		No	No	No	>0,9999	>0,9999	>0,9999		0			0	1	0			Signalling scaffold		ENSMUSG00000025658	Cnksr2	connector enhancer of kinase suppressor of Ras 2 [Source:MGI Symbol;Acc:MGI:2661175]			1.01767	1.08259	1.05099	-2.66455	-1.42308	-2.55292	-1.38525	-0.151748	-0.319159
	COF1	7.33187e-05	9.73963e-05	8.06149e-05	4.75605e-05	4.29533e-05	3.97367e-05	3.70653e-05	9.09618e-05	4.71887e-05		No	No	No	>0,9999	>0,9999	>0,9999		0			0	1	0			Cytoskeletal protein and adaptors		ENSMUSG00000056201	Cfl1	cofilin 1, non-muscle [Source:MGI Symbol;Acc:MGI:101757]			0.245029	0.654714	0.381894	-0.379388	-0.526385	-0.638681	-0.739084	0.556109	-0.39071
	CPSF5	0.000228165	0.00018026	0.000208423	2.72089e-05	2.96078e-05	2.82871e-05	3.9262e-05	9.33091e-05	7.45447e-05		No	No	No	0.9502	0.9502	0.9502		0			0	1	0			mRNA regulation		ENSMUSG00000031754	Nudt21	nudix (nucleoside diphosphate linked moiety X)-type motif 21 [Source:MGI Symbol;Acc:MGI:1915469]			1.17561	0.835616	1.04505	-1.89231	-1.77041	-1.83624	-1.36326	-0.114372	-0.438285
	CS044	0.00111454	0.000409553	0.00119725	0.00146112	0.00299429	0.00146973	0.00198164	0.00177264	0.00486978		Yes	Yes	Yes	0.0028	<0,0001	0.0088		1			0	0	1			Other		ENSMUSG00000052794	1700030K09Rik	RIKEN cDNA 1700030K09 gene [Source:MGI Symbol;Acc:MGI:1919504]			-0.783872	-2.22819	-0.680588	-0.393242	0.641899	-0.384766	0.0463783	-0.114418	1.34354
	CSKI1	8.32134e-05	4.08603e-05	9.12178e-05	2.83352e-06	2.38967e-05	1.80574e-05	4.1669e-05	3.52986e-05	3.73669e-05		No	No	No	0.993	0.993	0.993		0			0	1	0			Signalling scaffold		ENSMUSG00000033597	Caskin1	CASK interacting protein 1 [Source:MGI Symbol;Acc:MGI:2442952]			1.00018	-0.0259362	1.13268	-3.87597	-0.799824	-1.20404	0.00233935	-0.237025	-0.154875
	CTNA2	0.000183039	0.000224067	0.000112008	1.4478e-05	5.4906e-05	6.73462e-05	0.000325326	0.000566541	0.000400682		No	No	No	0.7436	0.7067	0.7067		0			0	0	1			Synaptic adhesion		ENSMUSG00000063063	Ctnna2	catenin (cadherin associated protein), alpha 2 [Source:MGI Symbol;Acc:MGI:88275]			-0.242135	0.0496433	-0.950689	-3.90235	-1.97925	-1.68462	0.587597	1.38789	0.88817
	CTNB1	0.000243004	0.000127792	0.000198211	7.3913e-05	3.46878e-05	9.08121e-05	0.000332913	0.000478282	0.000330246		No	No	No	0.7534	0.7534	0.7534		0			0	0	1			Synaptic adhesion		ENSMUSG00000006932	Ctnnb1	catenin (cadherin associated protein), beta 1 [Source:MGI Symbol;Acc:MGI:88276]			0.195511	-0.731671	-0.0984352	-1.52157	-2.61297	-1.22451	0.649674	1.17239	0.638072
	CTND2	7.93425e-05	3.30713e-05	0.000112991	7.89892e-06	2.13148e-05	3.44889e-06	7.64629e-05	0.000108956	6.86406e-05		No	No	No	>0,9999	>0,9999	>0,9999		0			0	0	1			Synaptic adhesion		None	Ctnnd2	Catenin delta-2			0.479591	-0.782924	0.989628	-2.84878	-1.41665	-4.0443	0.426258	0.937169	0.270559
	CYFP2	0.000358329	0.000236649	0.000233724	7.66056e-05	4.71018e-05	6.72502e-06	9.27505e-05	0.00015306	0.000134637		No	No	No	0.8467	0.8467	0.8467		0			0	1	0			Cytoskeletal protein and adaptors		ENSMUSG00000020340	Cyfip2	cytoplasmic FMR1 interacting protein 2 [Source:MGI Symbol;Acc:MGI:1924134]			1.2675	0.668962	0.65102	-0.958263	-1.65993	-4.4681	-0.682358	0.0403087	-0.14471
	DDX3X	0.000509583	0.000890592	0.00178284	7.90554e-06	1.3849e-05	3.49861e-05	3.62467e-05	0.000103685	6.72591e-05		Yes	Yes	No	0.0019	0.0019	0.3089		1			0	1	0			mRNA regulation		ENSMUSG00000000787	Ddx3x	DEAD box helicase 3, X-linked [Source:MGI Symbol;Acc:MGI:103064]			0.411994	1.21744	2.21878	-5.59831	-4.78946	-3.45247	-3.4014	-1.88511	-2.50952
	DDX5	0.00943792	0.0114755	0.0103163	9.00611e-05	8.25074e-05	0.000127908	0.000251084	0.000325348	0.000183251		Yes	Yes	No	<0,0001	<0,0001	0.2288		1			0	1	0			mRNA regulation		None	Ddx5	Probable ATP-dependent RNA helicase DDX5			1.39539	1.6774	1.52377	-5.31603	-5.44241	-4.8099	-3.83684	-3.46303	-4.29119
	DPYL1	0.000102424	6.46246e-05	0.000140389	6.77297e-06	1.35878e-05	2.93503e-05	3.08333e-05	6.84293e-05	2.11091e-05		No	No	No	0.9922	0.9922	0.9922		0			0	1	0			Cytoskeletal protein and adaptors		ENSMUSG00000029121	Crmp1	collapsin response mediator protein 1 [Source:MGI Symbol;Acc:MGI:107793]			0.948916	0.284518	1.40379	-2.96971	-1.96525	-0.854192	-0.783076	0.367047	-1.3297
	DPYL2	0.00193175	0.00197181	0.00251975	0.00092989	0.000606064	0.000763913	0.0011165	0.00132038	0.00107602		Yes	Yes	No	<0,0001	0.0024	0.0823		1			0	1	0			Cytoskeletal protein and adaptors		ENSMUSG00000022048	Dpysl2	dihydropyrimidinase-like 2 [Source:MGI Symbol;Acc:MGI:1349763]			0.506762	0.536375	0.890136	-0.548012	-1.1656	-0.831664	-0.28416	-0.0421866	-0.337436
	DTNA	0.000115347	8.43649e-05	0.000175695	0.000147201	0.000124234	7.80525e-05	0.00010488	8.70859e-05	6.13418e-05		No	No	No	>0,9999	>0,9999	>0,9999		0			0	1	0		Yes	Synaptic adhesion		ENSMUSG00000024302	Dtna	dystrobrevin alpha [Source:MGI Symbol;Acc:MGI:106039]			0.0857762	-0.365493	0.692861	0.437577	0.192857	-0.477692	-0.0514638	-0.319698	-0.825265
	DYHC1	4.37187e-05	6.04549e-05	8.07157e-05	8.34694e-06	1.60563e-05	2.05406e-06	2.05733e-05	4.58707e-05	9.19842e-06		No	No	No	>0,9999	>0,9999	>0,9999		0			0	1	0			Cytoskeletal protein and adaptors		ENSMUSG00000018707	Dync1h1	dynein cytoplasmic 1 heavy chain 1 [Source:MGI Symbol;Acc:MGI:103147]			0.455251	0.92286	1.33985	-1.93368	-0.989861	-3.95645	-0.632223	0.524574	-1.79354
	DYL1	0.0169798	0.0178872	0.0179046	0.0126462	0.0136832	0.0119992	0.0136076	0.0170815	0.0144219		Yes	Yes	Yes	<0,0001	<0,0001	<0,0001		1			0	1	0		Yes	Cytoskeletal protein and adaptors		ENSMUSG00000009013	Dynll1	dynein light chain LC8-type 1 [Source:MGI Symbol;Acc:MGI:1861457]			0.165969	0.241082	0.242483	-0.259143	-0.145445	-0.334913	-0.153441	0.17459	-0.0695865
	DYL2	0.00334399	0.00443389	0.00302262	0.00213043	0.00219923	0.00199943	0.00138231	0.00181694	0.00134765		Yes	Yes	Yes	<0,0001	<0,0001	0.0285		1			0	1	0		Yes	Cytoskeletal protein and adaptors		ENSMUSG00000020483	Dynll2	dynein light chain LC8-type 2 [Source:MGI Symbol;Acc:MGI:1915347]			0.473435	0.880439	0.327663	-0.176987	-0.131133	-0.268549	-0.801049	-0.406623	-0.837693
	EAA2	0.000484107	0.000398492	0.00012898	0.000112595	0.000104298	7.23052e-05	0.000175681	0.000323	0.000228526		No	No	No	0.8208	0.8208	0.8208		0			0	1	0			Ion channels and transport		ENSMUSG00000005089	Slc1a2	solute carrier family 1 (glial high affinity glutamate transporter), member 2 [Source:MGI Symbol;Acc:MGI:101931]			1.10328	0.822502	-0.804902	-1.00091	-1.11134	-1.63988	-0.359091	0.519486	0.0203096
	EF1A1	0.000684478	0.00144922	0.0013729	0.00146678	0.00177283	0.00135898	0.000335916	0.000717466	0.000554641		No	No	Yes	0.1994	0.0667	0.0074		1			1	0	0			mRNA regulation		ENSMUSG00000037742	Eef1a1	eukaryotic translation elongation factor 1 alpha 1 [Source:MGI Symbol;Acc:MGI:1096881]			-0.656948	0.425256	0.347199	0.442632	0.71603	0.332502	-1.68385	-0.589043	-0.960397
	EFTU	0.000105075	0.000133456	0.000167108	1.46495e-05	6.01759e-05	8.92699e-05	6.04596e-05	3.17821e-05	6.43819e-05		No	No	No	>0,9999	>0,9999	>0,9999		0			0	1	0			mRNA regulation		ENSMUSG00000073838	Tufm	Tu translation elongation factor, mitochondrial [Source:MGI Symbol;Acc:MGI:1923686]			0.380669	0.725607	1.05002	-2.46184	-0.423497	0.14549	-0.416712	-1.34447	-0.326029
	ELAV1	0.000524748	0.000604428	0.000556379	7.56272e-05	0.000155379	7.93536e-05	4.43177e-05	9.53358e-05	7.96964e-05		No	No	No	0.2812	0.2812	0.9757		0			0	1	0			mRNA regulation		ENSMUSG00000040028	Elavl1	ELAV (embryonic lethal, abnormal vision)-like 1 (Hu antigen R) [Source:MGI Symbol;Acc:MGI:1100851]			1.09214	1.29609	1.17659	-1.70251	-0.663693	-1.63312	-2.47353	-1.36839	-1.62689
	ENAH	0.0131975	0.0120893	0.012651	0.00804679	0.00889202	0.0106448	0.0126036	0.0168057	0.0165847		Yes	Yes	Yes	<0,0001	<0,0001	<0,0001		1			0	0	1		Yes	Cytoskeletal protein and adaptors		ENSMUSG00000022995	Enah	ENAH actin regulator [Source:MGI Symbol;Acc:MGI:108360]			0.091016	-0.0355133	0.0300093	-0.622762	-0.478664	-0.219099	0.0245944	0.439702	0.420605
	EVL	2.58874e-05	2.43383e-05	2.43886e-05	2.35077e-05	2.72113e-05	6.32387e-05	2.44747e-05	4.5364e-05	4.49758e-05		No	No	No	>0,9999	>0,9999	>0,9999		0			0	0	1		Yes	Cytoskeletal protein and adaptors		ENSMUSG00000021262	Evl	Ena-vasodilator stimulated phosphoprotein [Source:MGI Symbol;Acc:MGI:1194884]			-0.380908	-0.469931	-0.466954	-0.520027	-0.308956	0.907649	-0.461871	0.428388	0.415989
	FN3K	9.93182e-05	7.75863e-05	6.41845e-05	4.4016e-05	1.52317e-05	5.04471e-06	3.95665e-06	7.27426e-06	3.45398e-06		No	No	No	>0,9999	>0,9999	>0,9999		0			0	1	0			Metabolism		ENSMUSG00000025175	Fn3k	fructosamine 3 kinase [Source:MGI Symbol;Acc:MGI:1926834]			1.48168	1.12543	0.85185	0.307655	-1.2233	-2.81753	-3.16802	-2.2895	-3.36404
	FUBP2	0.00217385	0.00266627	0.00306867	0.000821305	0.000696683	0.000495373	0.00454975	0.00274765	0.00356784		Yes	Yes	Yes	<0,0001	0.0041	<0,0001		1			0	0	1			mRNA regulation		ENSMUSG00000007670	Khsrp	KH-type splicing regulatory protein [Source:MGI Symbol;Acc:MGI:1336214]			-0.0874589	0.207109	0.409902	-1.49172	-1.72914	-2.22112	0.978076	0.250487	0.627339
	GBB2	0.000108772	0.000111505	9.20242e-05	5.22541e-05	2.94037e-05	4.7251e-05	3.92887e-05	1.33177e-05	4.60009e-05		No	No	No	>0,9999	>0,9999	>0,9999		0			0	1	0			Other		ENSMUSG00000029713	Gnb2	guanine nucleotide binding protein (G protein), beta 2 [Source:MGI Symbol;Acc:MGI:95784]			0.858763	0.894558	0.61754	-0.198929	-1.02848	-0.344128	-0.61036	-2.17112	-0.382812
	GBRA1	0.000273911	0.000157086	0.000189744	0.000153954	0.000306802	0.000155193	0.000475225	0.000516045	0.000424795		No	No	No	>0,9999	0.6875	0.6875		0			0	0	1		Yes	Ion channels and transport		ENSMUSG00000010803	Gabra1	gamma-aminobutyric acid (GABA) A receptor, subunit alpha 1 [Source:MGI Symbol;Acc:MGI:95613]			-0.105787	-0.907942	-0.635444	-0.936993	0.0578145	-0.925433	0.689116	0.808003	0.527273
	GBRA2	1.74684e-05	1.41495e-05	2.16764e-05	1.10498e-05	1.54412e-05	2.20435e-05	5.11994e-05	2.92569e-05	2.71641e-05		No	No	No	>0,9999	>0,9999	>0,9999		0			0	0	1		Yes	Ion channels and transport		ENSMUSG00000000560	Gabra2	gamma-aminobutyric acid (GABA) A receptor, subunit alpha 2 [Source:MGI Symbol;Acc:MGI:95614]			-0.413857	-0.717851	-0.102475	-1.07458	-0.59182	-0.0782508	1.13752	0.330172	0.223099
	GBRB3	0.000318582	0.000480386	0.000308404	0.000231825	0.00034307	0.000273847	6.00095e-05	0.000214581	0.000176846		No	No	No	0.8406	0.8406	0.8406		0			0	1	0		1	Ion channels and transport		ENSMUSG00000033676	Gabrb3	gamma-aminobutyric acid (GABA) A receptor, subunit beta 3 [Source:MGI Symbol;Acc:MGI:95621]			0.252094	0.844626	0.205253	-0.206533	0.358933	0.0338023	-2.15631	-0.318045	-0.59708
	GEPH	1	1	1	1	1	1	1	1	1		No	No	No	>0,9999	>0,9999	>0,9999		0			0	0	0		Yes	Signalling scaffold		ENSMUSG00000047454	Gphn	gephyrin [Source:MGI Symbol;Acc:MGI:109602]			0	0	0	0	0	0	0	0	0
	GLNA	0.000563276	0.000760405	0.000777925	0.000140859	0.00015601	0.000100386	0.000303423	0.000722749	0.000889001		No	No	No	0.2167	0.8983	0.2167		0			0	1	0			Metabolism		ENSMUSG00000026473	Glul	glutamate-ammonia ligase (glutamine synthetase) [Source:MGI Symbol;Acc:MGI:95739]			0.19974	0.632668	0.66553	-1.79985	-1.65246	-2.28855	-0.692769	0.559394	0.858085
	GLRA2	0.000484675	0.000418594	0.000477818	0.000232958	0.00032034	0.000828384	0.000866442	0.00089104	0.00107308		No	No	No	>0,9999	0.2467	0.2467		0			0	0	1			Ion channels and transport		ENSMUSG00000018589	Glra2	glycine receptor, alpha 2 subunit [Source:MGI Symbol;Acc:MGI:95748]			-0.35869	-0.570159	-0.379249	-1.41564	-0.956106	0.41459	0.479393	0.519781	0.78797
	GLRA3	0.000126937	6.65569e-05	0.000140358	5.27735e-05	5.71575e-05	1.53109e-05	9.01267e-05	6.75415e-05	0.000101505		No	No	No	0.9894	0.9894	0.9894		0			0	1	0			Ion channels and transport		ENSMUSG00000038257	Glra3	glycine receptor, alpha 3 subunit [Source:MGI Symbol;Acc:MGI:95749]			0.669522	-0.261936	0.814515	-0.59671	-0.481579	-2.38196	0.175432	-0.240749	0.346951
	GLRB	0.00121392	0.00123218	0.00116008	0.000513956	0.000500087	0.00051169	0.00127304	0.00155948	0.001452		Yes	No	Yes	0.0441	0.3549	0.0149		1			0	0	1		Yes	Ion channels and transport		ENSMUSG00000028020	Glrb	glycine receptor, beta subunit [Source:MGI Symbol;Acc:MGI:95751]			0.21442	0.235958	0.148971	-1.02554	-1.06501	-1.03192	0.28302	0.575809	0.472786
	GNAO	0.000317332	0.000318556	0.000236074	9.31362e-05	0.00010646	7.52158e-05	7.46565e-05	0.000173847	6.19666e-05		No	No	No	No	No	No		0			0	1	0			Other		ENSMUSG00000031748	Gnao1	guanine nucleotide binding protein, alpha O [Source:MGI Symbol;Acc:MGI:95775]			0.970748	0.9763	0.543993	-0.797831	-0.604935	-1.10614	-1.11691	0.102573	-1.38568
	GPX4	0.00014252	0.000257574	0.000299653	7.38542e-05	0.000143359	9.94996e-05	7.27967e-05	0.000135291	0.00013681		No	No	No	>0,9999	>0,9999	>0,9999		0			0	1	0			Metabolism		ENSMUSG00000075706	Gpx4	glutathione peroxidase 4 [Source:MGI Symbol;Acc:MGI:104767]			-0.0858894	0.767936	0.986246	-1.0343	-0.0774178	-0.604286	-1.0551	-0.160985	-0.144871
	GRB2	1.14029e-05	6.0408e-05	4.29988e-05	9.13043e-06	1.04277e-05	1.79106e-05	1.06705e-05	1.46234e-05	1.92596e-05		No	No	No	>0,9999	>0,9999	>0,9999		0			0	1	0			Signalling scaffold		ENSMUSG00000059923	Grb2	growth factor receptor bound protein 2 [Source:MGI Symbol;Acc:MGI:95805]			-0.939564	1.46577	0.975329	-1.26021	-1.06854	-0.288155	-1.03535	-0.580684	-0.183392
	GRP75	6.46951e-05	0.000248863	0.000137353	1.70882e-05	4.09515e-05	1.90582e-05	3.992e-05	8.60032e-05	2.72706e-05		No	No	No	0.9877	0.9877	0.9877		0			0	1	0			Structure and trafficking		ENSMUSG00000024359	Hspa9	heat shock protein 9 [Source:MGI Symbol;Acc:MGI:96245]			-0.22643	1.71719	0.859727	-2.14709	-0.88617	-1.98967	-0.922973	0.184304	-1.47274
	GSK3B	0.000190122	0.000202521	0.000153285	8.27632e-05	4.42432e-05	5.14413e-05	6.57309e-05	0.000109662	8.32072e-05		No	No	No	0.984	0.984	0.984		0			0	1	0			Phosphorylation regulation		ENSMUSG00000022812	Gsk3b	glycogen synthase kinase 3 beta [Source:MGI Symbol;Acc:MGI:1861437]			0.799693	0.890842	0.488989	-0.400171	-1.3037	-1.08623	-0.732589	0.00582892	-0.392451
	HNRH1	0.00193894	0.00192024	0.00259346	0.000210211	0.000639323	0.000386325	0.0010125	0.00112957	0.000874659		Yes	Yes	Yes	<0,0001	0.0004	0.0285		1			0	1	0			mRNA regulation		ENSMUSG00000007850	Hnrnph1	heterogeneous nuclear ribonucleoprotein H1 [Source:MGI Symbol;Acc:MGI:1891925]			0.704952	0.690968	1.12456	-2.50041	-0.895702	-1.62243	-0.232402	-0.0745404	-0.443527
	HNRPU	0.0238633	0.0238518	0.024897	0.000296542	0.000646152	0.000868253	0.00049326	0.000752804	0.00091421		Yes	Yes	No	<0,0001	<0,0001	0.2564		1			0	1	0			mRNA regulation		ENSMUSG00000039630	Hnrnpu	heterogeneous nuclear ribonucleoprotein U [Source:MGI Symbol;Acc:MGI:1858195]			1.48769	1.48699	1.54887	-4.84272	-3.71909	-3.29285	-4.10861	-3.49869	-3.21844
	HPHL1	4.22627e-05	4.84979e-05	3.29585e-05	1.35989e-05	2.21434e-05	2.04118e-05	0.000990997	0.00107258	0.0012187		No	Yes	Yes	0.3315	0.0011	0.0011		1			0	0	1			Metabolism		ENSMUSG00000031936	Hephl1	hephaestin-like 1 [Source:MGI Symbol;Acc:MGI:2685355]			-3.18621	-2.98768	-3.54495	-4.82211	-4.11872	-4.2362	1.36521	1.47934	1.6636
	HS105	0.000305022	0.000630466	0.000408196	0.000285147	0.000295367	0.000388917	0.000572127	0.000314538	0.000440211		No	No	No	>0,9999	>0,9999	>0,9999		0			0	1	0			Structure and trafficking		ENSMUSG00000029657	Hsph1	heat shock 105kDa/110kDa protein 1 [Source:MGI Symbol;Acc:MGI:105053]			-0.407023	0.64048	0.0133249	-0.504234	-0.453431	-0.0564754	0.500398	-0.362703	0.122258
	HSP72	5.44148e-05	4.28546e-05	3.12707e-05	8.71037e-06	1.61429e-05	2.28638e-05	3.23555e-05	1.11325e-05	1.2425e-05		No	No	No	>0,9999	>0,9999	>0,9999		0			0	1	0			Structure and trafficking		ENSMUSG00000059970	Hspa2	heat shock protein 2 [Source:MGI Symbol;Acc:MGI:96243]			1.07681	0.732265	0.277626	-1.56638	-0.676286	-0.174119	0.326825	-1.21241	-1.05394
	HSP7C	0.009244	0.0104213	0.0105954	0.00616891	0.00651833	0.00705808	0.00645226	0.00663938	0.00640607		Yes	Yes	No	<0,0001	<0,0001	0.2829		1			0	1	0			Structure and trafficking		ENSMUSG00000015656	Hspa8	heat shock protein 8 [Source:MGI Symbol;Acc:MGI:105384]			0.259424	0.432369	0.456267	-0.324077	-0.244589	-0.129816	-0.259287	-0.218043	-0.269652
	INSY1	0.000201523	0.000183719	0.000296762	0.000217914	0.000159972	0.000211518	0.000442377	0.000237963	0.000431575		No	No	No	0.9738	0.9738	0.9738		0			0	0	1			Synaptic adhesion		ENSMUSG00000066607	Insyn1	inhibitory synaptic factor 1 [Source:MGI Symbol;Acc:MGI:2442108]			-0.394035	-0.527478	0.164329	-0.28122	-0.727159	-0.324199	0.740301	-0.15424	0.704635
	IQEC2	0.000269722	0.000119493	0.000426687	0.000534606	0.000723207	0.000566259	0.000365731	0.000450565	0.000391346		No	No	No	0.7362	0.7362	0.7362		0			1	0	0			Signalling scaffold		None	Iqsec2	IQ motif and SEC7 domain-containing protein 2			-0.664495	-1.83904	-0.00279058	0.322508	0.758441	0.405495	-0.225186	0.0757676	-0.127523
	IQEC3	0.0227536	0.0230352	0.0267007	0.0388862	0.0389397	0.0414897	0.021454	0.0235243	0.0245482		Yes	Yes	Yes	<0,0001	0.004	<0,0001		1			1	0	0		1	Signalling scaffold		ENSMUSG00000040797	Iqsec3	IQ motif and Sec7 domain 3 [Source:MGI Symbol;Acc:MGI:2677208]			-0.351791	-0.334047	-0.121008	0.421373	0.423357	0.51487	-0.436635	-0.303732	-0.242269
	KCC2A	0.015311	0.014579	0.0161079	0.0034812	0.00576632	0.00676792	0.0097927	0.00816595	0.00951254		Yes	Yes	Yes	<0,0001	<0,0001	<0,0001		1			0	1	0			Phosphorylation regulation		ENSMUSG00000024617	Camk2a	calcium/calmodulin-dependent protein kinase II alpha [Source:MGI Symbol;Acc:MGI:88256]			0.622852	0.552182	0.696052	-1.51405	-0.78599	-0.554927	-0.0219335	-0.28402	-0.0638103
	KCC2B	0.00210749	0.00223731	0.00200573	0.000700287	0.000799691	0.000884824	0.00147785	0.00187818	0.00187352		Yes	No	Yes	0.0001	0.0956	0.0029		1			0	1	0			Phosphorylation regulation		ENSMUSG00000057897	Camk2b	calcium/calmodulin-dependent protein kinase II, beta [Source:MGI Symbol;Acc:MGI:88257]			0.441721	0.527961	0.370323	-1.14779	-0.956292	-0.810345	-0.0703078	0.275527	0.271941
	KCC2G	5.98212e-05	0.000123206	6.28123e-05	7.30177e-06	4.31661e-05	2.61345e-05	0.000116388	6.6723e-05	8.15794e-05		No	No	No	>0,9999	>0,9999	>0,9999		0			0	0	1			Phosphorylation regulation		ENSMUSG00000021820	Camk2g	calcium/calmodulin-dependent protein kinase II gamma [Source:MGI Symbol;Acc:MGI:88259]			-0.125031	0.917307	-0.0546409	-3.15937	-0.595789	-1.31973	0.835186	0.0324949	0.322517
	KHDR1	0.000769108	0.000971935	0.000864487	4.23071e-05	8.87389e-05	5.49336e-05	8.22317e-05	0.00010042	0.000126995		Yes	Yes	No	0.0131	0.0131	0.3164		1			0	1	0			mRNA regulation		ENSMUSG00000028790	Khdrbs1	KH domain containing, RNA binding, signal transduction associated 1 [Source:MGI Symbol;Acc:MGI:893579]			1.15838	1.49605	1.32703	-3.02584	-1.95717	-2.64905	-2.06704	-1.77876	-1.44004
	MAGI3	0.000276623	0.000249775	0.000215114	0.000298109	0.000348858	0.000402568	0.000314487	0.000212962	0.000299208		No	No	No	0.9812	0.9812	0.9812		0			1	0	0			Signalling scaffold		ENSMUSG00000052539	Magi3	membrane associated guanylate kinase, WW and PDZ domain containing 3 [Source:MGI Symbol;Acc:MGI:1923484]			-0.0723841	-0.219675	-0.435206	0.0355363	0.262337	0.468926	0.112696	-0.449711	0.040844
	MAP4	0.000489266	0.000496212	0.000661438	0.000124777	0.000287859	0.00041516	0.000437414	0.000551297	0.000491817		No	No	No	0.8243	0.9145	0.8243		0			0	1	0			Cytoskeletal protein and adaptors		ENSMUSG00000032479	Map4	microtubule-associated protein 4 [Source:MGI Symbol;Acc:MGI:97178]			0.154851	0.175187	0.589837	-1.81641	-0.610405	-0.082101	-0.00676856	0.327062	0.162353
	MAP6	0.00579259	0.00560938	0.00650917	0.00119186	0.00176759	0.00136407	0.00249585	0.00332255	0.00309362		Yes	Yes	Yes	<0,0001	<0,0001	<0,0001		1			0	1	0			Cytoskeletal protein and adaptors		ENSMUSG00000055407	Map6	microtubule-associated protein 6 [Source:MGI Symbol;Acc:MGI:1201690]			0.743127	0.696759	0.911391	-1.53786	-0.969295	-1.34317	-0.471548	-0.0587908	-0.161785
	MARE3	1.88933e-05	1.66417e-05	1.11504e-05	1.04348e-05	6.29136e-06	4.0516e-06	1.41365e-05	2.4377e-05	1.91707e-05		No	No	No	>0,9999	>0,9999	>0,9999		0			0	0	1			Cytoskeletal protein and adaptors		ENSMUSG00000029166	Mapre3	microtubule-associated protein, RP/EB family, member 3 [Source:MGI Symbol;Acc:MGI:2140967]			0.442241	0.259176	-0.318538	-0.41423	-1.14419	-1.77907	0.0237903	0.809892	0.463272
	MASP1	0.000544936	0.000750396	0.000616015	4.5611e-05	4.56769e-05	3.4443e-05	0.000768242	0.000542462	0.000415926		No	No	No	0.1851	0.8991	0.1851		0			0	1	0			Other		ENSMUSG00000022887	Masp1	mannan-binding lectin serine peptidase 1 [Source:MGI Symbol;Acc:MGI:88492]			0.381929	0.843494	0.558807	-3.1967	-3.19462	-3.60188	0.877403	0.375365	-0.00783063
	MK01	0.000205325	0.000289845	0.000162049	5.74068e-05	4.93379e-05	5.46276e-05	0.000109026	0.00017962	0.000136291		No	No	No	0.8614	0.8614	0.8614		0			0	1	0			Phosphorylation regulation		ENSMUSG00000063358	Mapk1	mitogen-activated protein kinase 1 [Source:MGI Symbol;Acc:MGI:1346858]			0.571469	1.06884	0.229985	-1.26715	-1.48567	-1.33874	-0.341766	0.378504	-0.0197497
	MTAP2	0.000821983	0.00214089	0.0012852	0.000478364	0.000917808	0.000479893	0.000693734	0.000826426	0.000832864		No	No	No	0.0645	0.1006	0.6726		0			0	1	0			Cytoskeletal protein and adaptors		ENSMUSG00000015222	Map2	microtubule-associated protein 2 [Source:MGI Symbol;Acc:MGI:97175]			-0.196476	1.18456	0.448337	-0.977477	-0.0373925	-0.972871	-0.441203	-0.1887	-0.177504
	NFL	0.0010353	0.000894077	0.000934165	0.00017804	6.7177e-05	0.000138786	0.000224088	0.000457841	0.000365794		Yes	No	No	0.0324	0.0797	0.3611		1			0	1	0			Cytoskeletal protein and adaptors		ENSMUSG00000022055	Nefl	neurofilament, light polypeptide [Source:MGI Symbol;Acc:MGI:97313]			1.11723	0.905647	0.968926	-1.42255	-2.82871	-1.78189	-1.09069	-0.0599054	-0.383719
	NFM	0.000472093	0.000586646	0.000588301	9.47547e-05	0.000209979	0.000117449	0.00015045	0.000338145	0.000258935		No	No	No	0.596	0.596	0.7877		0			0	1	0			Cytoskeletal protein and adaptors		None	Nefm	Neurofilament medium polypeptide			0.593036	0.906454	0.910519	-1.72377	-0.575794	-1.414	-1.05675	0.111605	-0.273444
	NLGN2	0.000181479	0.00015929	0.000132962	0.000235511	0.000163638	0.000148983	0.000384601	0.000352423	0.000327558		No	No	No	0.9877	0.9663	0.9663		0			0	0	1		Yes	Synaptic adhesion		ENSMUSG00000051790	Nlgn2	neuroligin 2 [Source:MGI Symbol;Acc:MGI:2681835]			-0.35325	-0.54139	-0.80204	0.0227441	-0.50254	-0.637904	0.730312	0.604258	0.498702
	NLGN3	0.000116461	7.90624e-05	0.000104095	5.91157e-05	4.31205e-05	4.06776e-05	0.000153269	0.000139825	0.000128161		No	No	No	0.9503	0.9503	0.9503		0			0	0	1			Synaptic adhesion		ENSMUSG00000031302	Nlgn3	neuroligin 3 [Source:MGI Symbol;Acc:MGI:2444609]			0.279094	-0.279688	0.117149	-0.699138	-1.15431	-1.23844	0.675318	0.542871	0.417206
	PCLO	0.000212219	0.000131321	0.000136956	8.67873e-06	3.00201e-05	2.07063e-05	3.53512e-05	6.81174e-05	4.17132e-05		No	No	No	0.9797	0.9797	0.9797		0			0	1	0			Signalling scaffold		ENSMUSG00000061601	Pclo	piccolo (presynaptic cytomatrix protein) [Source:MGI Symbol;Acc:MGI:1349390]			1.4792	0.786744	0.847358	-3.13272	-1.34235	-1.87821	-1.10652	-0.160256	-0.867778
	PFKAP	0.000804939	0.00158378	0.000901972	6.40999e-06	1.42459e-05	3.46292e-06	0.000151309	0.000121601	0.000145029		Yes	Yes	No	0.0015	0.0026	0.2449		1			0	1	0			Metabolism		ENSMUSG00000021196	Pfkp	phosphofructokinase, platelet [Source:MGI Symbol;Acc:MGI:1891833]			0.956637	1.93306	1.12084	-6.01578	-4.86362	-6.90411	-1.45475	-1.77008	-1.5159
	PIN1	7.21589e-05	7.58378e-05	0.000100731	3.47848e-05	4.53438e-05	7.0388e-05	3.95736e-05	6.01533e-05	6.7963e-05		No	No	No	>0,9999	>0,9999	>0,9999		0			0	1	0		Yes	Structure and trafficking		ENSMUSG00000032171	Pin1	protein (peptidyl-prolyl cis/trans isomerase) NIMA-interacting 1 [Source:MGI Symbol;Acc:MGI:1346036]			0.195994	0.267733	0.677249	-0.856726	-0.474279	0.160146	-0.670647	-0.0665401	0.109566
	PP2AA	5.1659e-05	7.51156e-05	0.000112972	1.33716e-05	1.26363e-05	1.65332e-05	1.85069e-05	4.39089e-05	2.093e-05		No	No	No	>0,9999	>0,9999	>0,9999		0			0	1	0			Phosphorylation regulation		ENSMUSG00000020349	Ppp2ca	protein phosphatase 2 (formerly 2A), catalytic subunit, alpha isoform [Source:MGI Symbol;Acc:MGI:1321159]			0.346618	0.886713	1.47549	-1.60323	-1.68482	-1.29703	-1.13434	0.112113	-0.956825
	PP2BA	0.00051509	0.00046159	0.000510578	0.000181645	0.000226323	0.000112289	0.000264428	0.000251942	0.000207945		No	No	No	0.716	0.716	0.8838		0			0	1	0			Phosphorylation regulation		ENSMUSG00000028161	Ppp3ca	protein phosphatase 3, catalytic subunit, alpha isoform [Source:MGI Symbol;Acc:MGI:107164]			0.762953	0.604742	0.75026	-0.740749	-0.423488	-1.43466	-0.198997	-0.268777	-0.545666
	PRDX1	0.000128172	0.000138068	8.05204e-05	4.16773e-05	3.75201e-05	3.17391e-05	4.34784e-05	4.81097e-05	6.6256e-05		No	No	No	>0,9999	>0,9999	>0,9999		0			0	1	0			Metabolism		ENSMUSG00000028691	Prdx1	peroxiredoxin 1 [Source:MGI Symbol;Acc:MGI:99523]			0.906152	1.01345	0.235496	-0.714595	-0.866193	-1.1076	-0.653558	-0.507532	-0.0458059
	PRDX5	0.000246656	0.000251992	0.000163706	0.000231796	0.000141317	0.000193158	0.000173466	0.000283643	0.000203964		No	No	No	>0,9999	>0,9999	>0,9999		0			0	1	0			Metabolism		ENSMUSG00000024953	Prdx5	peroxiredoxin 5 [Source:MGI Symbol;Acc:MGI:1859821]			0.232339	0.263221	-0.359055	0.142695	-0.571219	-0.120375	-0.275506	0.433917	-0.0418449
	PROF2	0.001169	0.00116452	0.000847666	0.000571669	0.000663772	0.00071484	0.00104981	0.000903945	0.000835152		No	No	No	0.6491	0.7355	0.6491		0			0	1	0		Yes	Cytoskeletal protein and adaptors		ENSMUSG00000027805	Pfn2	profilin 2 [Source:MGI Symbol;Acc:MGI:97550]			0.409633	0.404095	-0.0540772	-0.622392	-0.406884	-0.299952	0.254484	0.0386625	-0.0755345
	RHG32	0.0141095	0.0145283	0.0150261	0.00205738	0.00270078	0.00253363	0.0150835	0.0161968	0.0154949		Yes	Yes	Yes	<0,0001	0.0025	<0,0001		1			0	0	1		Yes	Structure and trafficking		ENSMUSG00000041444	Arhgap32	Rho GTPase activating protein 32 [Source:MGI Symbol;Acc:MGI:2450166]			0.377778	0.419979	0.468583	-2.40001	-2.00744	-2.09961	0.47408	0.576815	0.512905
	RHG44	4.23521e-06	6.66519e-06	9.28747e-06	1.39395e-06	3.11369e-06	3.24323e-06	8.64072e-06	1.31246e-05	4.40387e-06		No	No	No	>0,9999	>0,9999	>0,9999		0			0	0	1			Signalling scaffold		ENSMUSG00000033389	Arhgap44	Rho GTPase activating protein 44 [Source:MGI Symbol;Acc:MGI:2144423]			-0.50541	0.148803	0.627442	-2.10866	-0.94922	-0.890411	0.523309	1.12636	-0.449071
	RL24	0.000226543	0.000291524	0.000188156	5.89782e-06	7.81628e-06	8.76456e-06	9.1945e-06	1.39046e-05	1.08988e-05		No	No	No	0.8034	0.8034	>0,9999		0			0	1	0			Ribosome		ENSMUSG00000098274	Rpl24	ribosomal protein L24 [Source:MGI Symbol;Acc:MGI:1915443]			1.4186	1.78242	1.15074	-3.84487	-3.43856	-3.27336	-3.20427	-2.60756	-2.95895
	RMXL1	0.00513522	0.00495122	0.00492812	0.000194306	0.000381393	0.000242773	0.000217905	0.000275185	0.000341139		Yes	Yes	No	<0,0001	<0,0001	0.3456		1			0	1	0			mRNA regulation		ENSMUSG00000037070	Rbmxl1	RNA binding motif protein, X-linked like-1 [Source:MGI Symbol;Acc:MGI:1343045]			1.47141	1.41876	1.41202	-3.25262	-2.27967	-2.93134	-3.08725	-2.75055	-2.44059
	RS13	0.00701568	0.00711878	0.00642349	9.70647e-06	8.11912e-06	6.363e-06	0.00103335	0.00151046	0.00122415		Yes	Yes	Yes	<0,0001	<0,0001	0.0003		1			0	1	0			Ribosome		ENSMUSG00000090862	Rps13	ribosomal protein S13 [Source:MGI Symbol;Acc:MGI:1915302]			1.37465	1.3957	1.24743	-8.12277	-8.38039	-8.73201	-1.38861	-0.840944	-1.14415
	RS2	0.00338323	0.0035516	0.00379815	1.17207e-05	1.66586e-05	1.4749e-05	0.000162414	0.000255554	0.000234637		Yes	Yes	No	<0,0001	<0,0001	0.1927		1			0	1	0			Ribosome		ENSMUSG00000044533	Rps2	ribosomal protein S2 [Source:MGI Symbol;Acc:MGI:105110]			1.41374	1.4838	1.58063	-6.75946	-6.25225	-6.42791	-2.96692	-2.31296	-2.43616
	RS3	0.00193864	0.00180158	0.00286127	4.16891e-06	1.10536e-05	1.29664e-05	0.000165766	0.000192733	0.000122371		Yes	Yes	No	<0,0001	<0,0001	0.2302		1			0	1	0			Ribosome		ENSMUSG00000030744	Rps3	ribosomal protein S3 [Source:MGI Symbol;Acc:MGI:1350917]			1.29501	1.18923	1.85662	-7.56615	-6.15938	-5.92912	-2.25281	-2.03536	-2.6907
	SAFB1	0.000442345	0.00035243	0.000393341	1.93644e-05	0.000104929	0.00013041	6.59441e-05	2.38067e-05	1.68636e-05		No	No	No	0.5692	0.5692	0.9292		0			0	1	0			Other		ENSMUSG00000071054	Safb	scaffold attachment factor B [Source:MGI Symbol;Acc:MGI:2146974]			1.36143	1.03359	1.19204	-3.15227	-0.714333	-0.400687	-1.38443	-2.85431	-3.35176
	SEPT5	6.81039e-05	6.97118e-05	0.000144717	2.54094e-05	6.18292e-06	4.96825e-05	3.62651e-05	0.000193106	6.6322e-05		No	No	No	>0,9999	>0,9999	>0,9999		0			0	0	1			Cytoskeletal protein and adaptors		ENSMUSG00000072214	Septin5	septin 5 [Source:MGI Symbol;Acc:MGI:1195461]			-0.105639	-0.0719753	0.98179	-1.52801	-3.56702	-0.560639	-1.0148	1.39794	-0.143889
	SEPT8	2.82373e-05	3.88483e-05	2.21729e-05	3.13242e-06	3.05714e-06	8.87203e-06	3.14688e-06	2.42397e-05	1.37866e-05		No	No	No	>0,9999	>0,9999	>0,9999		0			0	1	0			Other		ENSMUSG00000018398	Septin8	septin 8 [Source:MGI Symbol;Acc:MGI:894310]			0.804645	1.2649	0.45584	-2.36761	-2.4027	-0.86562	-2.36096	0.584419	-0.229686
	SIR2	0.000243625	0.000232575	0.000153078	0.000636791	0.000507387	0.00051219	0.000133049	0.000260725	0.000242363		No	No	No	0.5012	>0,9999	0.5012		0			1	0	0			Other		ENSMUSG00000015149	Sirt2	sirtuin 2 [Source:MGI Symbol;Acc:MGI:1927664]			-0.414187	-0.481154	-1.08459	0.971968	0.644233	0.657828	-1.28689	-0.316323	-0.421685
	SKT	0.000282312	0.000134774	0.000195577	3.14154e-06	3.31957e-05	7.73429e-06	0.000117348	0.000211035	0.000146762		No	No	No	0.9372	0.9372	0.9372		0			0	1	0			Other		ENSMUSG00000036617	Etl4	enhancer trap locus 4 [Source:MGI Symbol;Acc:MGI:95454]			1.16657	0.0998145	0.637017	-5.32311	-1.92166	-4.02331	-0.0999319	0.746757	0.222756
	SNTB2	4.61912e-05	3.35584e-05	4.47817e-05	6.69595e-05	6.92184e-05	6.17974e-05	4.40376e-05	4.65809e-05	3.49353e-05		No	No	No	>0,9999	>0,9999	>0,9999		0			1	0	0			Synaptic adhesion		ENSMUSG00000041308	Sntb2	syntrophin, basic 2 [Source:MGI Symbol;Acc:MGI:101771]			-0.108078	-0.56902	-0.152787	0.427592	0.475459	0.311849	-0.176962	-0.0959571	-0.511009
	SRCN1	0.0043627	0.00436541	0.00494538	0.00023081	0.000504734	0.000540427	0.00141323	0.00186592	0.00142055		Yes	Yes	Yes	<0,0001	<0,0001	0.0009		1			0	1	0			Phosphorylation regulation		None	Srcin1	SRC kinase signaling inhibitor 1			0.998751	0.999647	1.17961	-3.24169	-2.11288	-2.0143	-0.627473	-0.226582	-0.620026
	SYNJ1	8.33422e-05	0.000123605	0.000140629	6.62061e-05	7.76591e-05	2.01181e-05	9.30941e-05	6.87021e-05	3.31447e-05		No	No	No	>0,9999	>0,9999	>0,9999		0			0	1	0			Phosphorylation regulation		None	Synj1	Synaptojanin-1			0.0863542	0.654969	0.841127	-0.245728	-0.0155366	-1.9642	0.245997	-0.192338	-1.24391
	SYNPO	0.000301295	0.000252163	0.000263284	7.62966e-05	6.35261e-05	5.63445e-05	0.000132682	0.000206894	0.000231144		No	No	No	0.851	0.851	0.851		0			0	1	0			Cytoskeletal protein and adaptors		ENSMUSG00000043079	Synpo	synaptopodin [Source:MGI Symbol;Acc:MGI:1099446]			0.77594	0.519121	0.581379	-1.20555	-1.46982	-1.64289	-0.407267	0.233657	0.393553
	TAU	0.000141444	0.000296997	0.00027182	6.40234e-05	8.92157e-05	0.000119672	0.000174781	0.000103629	0.000309125		No	No	No	0.9502	0.9502	0.9502		0			0	1	0			Cytoskeletal protein and adaptors		ENSMUSG00000018411	Mapt	microtubule-associated protein tau [Source:MGI Symbol;Acc:MGI:97180]			-0.303187	0.767032	0.639235	-1.44675	-0.968047	-0.544333	0.00213049	-0.751987	0.824771
	TBA1B	0.00493243	0.00503655	0.00477742	0.00118333	0.00151041	0.00128942	0.0017792	0.00252423	0.0016267		Yes	Yes	Yes	<0,0001	<0,0001	0.0199		1			0	1	0			Cytoskeletal protein and adaptors		ENSMUSG00000023004	Tuba1b	tubulin, alpha 1B [Source:MGI Symbol;Acc:MGI:107804]			0.84814	0.878279	0.802074	-1.21131	-0.859219	-1.08744	-0.62293	-0.118314	-0.752206
	TBB2A	0.0102136	0.0122604	0.0111554	0.00153329	0.00155184	0.00160279	0.0037898	0.00499415	0.00272569		Yes	Yes	Yes	<0,0001	<0,0001	<0,0001		1			0	1	0			Cytoskeletal protein and adaptors		ENSMUSG00000058672	Tubb2a	tubulin, beta 2A class IIA [Source:MGI Symbol;Acc:MGI:107861]			0.883492	1.147	1.01074	-1.8523	-1.83495	-1.78835	-0.546808	-0.14869	-1.02231
	TBB3	0.00342035	0.00195927	0.00200082	0.000121533	0.000230379	0.000199647	0.000183085	0.000773462	0.000285398		Yes	Yes	No	<0,0001	<0,0001	0.175		1			0	1	0			Cytoskeletal protein and adaptors		ENSMUSG00000062380	Tubb3	tubulin, beta 3 class III [Source:MGI Symbol;Acc:MGI:107813]			1.74653	0.942697	0.972975	-3.06819	-2.14554	-2.35209	-2.47703	-0.398214	-1.83657
	TBB4A	0.00187819	0.00206291	0.00234165	0.000561576	0.000476034	0.000280418	0.000851694	0.000366853	0.000286159		Yes	Yes	No	<0,0001	<0,0001	0.2992		1			0	1	0			Cytoskeletal protein and adaptors		ENSMUSG00000062591	Tubb4a	tubulin, beta 4A class IVA [Source:MGI Symbol;Acc:MGI:107848]			0.892533	1.02787	1.21071	-0.849258	-1.08767	-1.85116	-0.248404	-1.46354	-1.82192
	TBB4B	0.0443027	0.0424289	0.0407547	0.0088141	0.00787604	0.0076726	0.0136259	0.0188857	0.0112301		Yes	Yes	Yes	<0,0001	<0,0001	<0,0001		1			0	1	0			Cytoskeletal protein and adaptors		ENSMUSG00000036752	Tubb4b	tubulin, beta 4B class IVB [Source:MGI Symbol;Acc:MGI:1915472]			1.02755	0.965205	0.907126	-1.30196	-1.4643	-1.50205	-0.673488	-0.202546	-0.952472
	TBB5	0.00243035	0.00264207	0.00220003	0.000187538	0.000701048	0.000678146	0.000187136	0.000205617	0.000686626		Yes	Yes	No	<0,0001	<0,0001	0.2218		1			0	1	0			Cytoskeletal protein and adaptors		ENSMUSG00000001525	Tubb5	tubulin, beta 5 class I [Source:MGI Symbol;Acc:MGI:107812]			1.14096	1.26146	0.997316	-2.55495	-0.652619	-0.700536	-2.55805	-2.42217	-0.682608
	TCPE	1.68654e-05	1.98372e-05	1.67108e-05	4.90319e-06	4.54862e-06	6.1064e-06	1.67792e-05	2.66693e-05	1.40128e-05		No	No	No	>0,9999	>0,9999	>0,9999		0			0	0	1			Structure and trafficking		ENSMUSG00000022234	Cct5	chaperonin containing Tcp1, subunit 5 (epsilon) [Source:MGI Symbol;Acc:MGI:107185]			0.263692	0.497834	0.250404	-1.51858	-1.62687	-1.20198	0.2563	0.924805	-0.00363251
	TPIS	0.000170199	0.000149775	0.000277276	0.000102259	6.55459e-05	3.3822e-05	8.61289e-05	0.000222277	8.60493e-05		No	No	No	0.8928	0.8928	0.8928		0			0	1	0			Metabolism		ENSMUSG00000023456	Tpi1	triosephosphate isomerase 1 [Source:MGI Symbol;Acc:MGI:98797]			0.360226	0.175799	1.06432	-0.374777	-1.01642	-1.97097	-0.622429	0.745361	-0.623763
	TPPP	3.3052e-05	0.000116775	0.000154577	5.14809e-05	6.15955e-05	0.00021708	0.000114937	0.000137686	0.000107224		No	No	No	>0,9999	>0,9999	>0,9999		0			0	0	1			Cytoskeletal protein and adaptors		ENSMUSG00000021573	Tppp	tubulin polymerization promoting protein [Source:MGI Symbol;Acc:MGI:1920198]			-1.7411	0.0798249	0.484413	-1.1018	-0.843015	0.974312	0.0569343	0.317467	-0.0432848
	TRUB1	3.70184e-05	3.6197e-05	4.03906e-05	5.01979e-05	6.12987e-05	5.51854e-05	0.000139043	0.000105002	0.000104954		No	No	No	>0,9999	>0,9999	>0,9999		0			0	0	1			Metabolism		ENSMUSG00000025086	Trub1	TruB pseudouridine (psi) synthase family member 1 [Source:MGI Symbol;Acc:MGI:1919383]			-0.917478	-0.949849	-0.791701	-0.478094	-0.189864	-0.341434	0.991738	0.586624	0.585962
	TSR2	9.63942e-06	1.04758e-05	2.17023e-05	7.34613e-06	6.97086e-06	5.99803e-06	1.51712e-05	9.75965e-06	5.06555e-05		No	No	No	>0,9999	>0,9999	>0,9999		0			0	0	1			mRNA regulation		None	Tsr2	Pre-rRNA-processing protein TSR2 homolog			-0.66671	-0.546673	0.504117	-1.05867	-1.13432	-1.35117	-0.0123965	-0.648828	1.72699
	VASP	1.71942e-05	3.22654e-05	2.32306e-05	1.98036e-05	1.22965e-05	1.21378e-05	4.40518e-05	6.09415e-05	4.58865e-05		No	No	No	>0,9999	>0,9999	>0,9999		0			0	0	1			Cytoskeletal protein and adaptors		ENSMUSG00000030403	Vasp	vasodilator-stimulated phosphoprotein [Source:MGI Symbol;Acc:MGI:109268]			-0.791284	0.116788	-0.357173	-0.587441	-1.27495	-1.29369	0.565998	1.03422	0.624868

## Sheet: Statistical Analysis results
	Statistical analysis used to determine interactors with significantly different abundances between different DARPin-determined interactomes
	Two-way ANOVA	Ordinary
	Alpha	0.05
	Source of Variation	% of total variation	P value	P value summary	Significant?
	Interaction	8.921	<0,0001	****	Yes
	Interactor	90.38	<0,0001	****	Yes
	Binder	0.2289	<0,0001	****	Yes
	ANOVA table	SS	DF	MS	F (DFn, DFd)	P value
	Interaction	0.001669	186	8.975e-06	F (186, 504) = 51,45	P<0,0001
	Interactor	0.01691	62	0.0002728	F (62, 504) = 1564	P<0,0001
	Binder	4.284e-05	3	1.428e-05	F (3, 504) = 81,86	P<0,0001
	Residual	8.793e-05	504	1.745e-07
	Multiple Comparisons
	Within each row, compare columns (simple effects within rows)
	Number of families	63
	Number of comparisons per family	6
	Alpha	0.05
	Tukey's multiple comparisons test	Mean Diff,	95,00% CI of diff,	Significant?	Summary	Adjusted P Value
	AJM1
	3B11 vs. 27B3	-6.911e-05	-0,0009482 to 0,0008100	No	ns	0.9971
	3B11 vs. 27F3	1.735e-18	-0,0008791 to 0,0008791	No	ns	>0,9999
	3B11 vs. 27G2	-0.0001656	-0,001045 to 0,0007135	No	ns	0.9623
	27B3 vs. 27F3	6.911e-05	-0,0008100 to 0,0009482	No	ns	0.9971
	27B3 vs. 27G2	-9.646e-05	-0,0009755 to 0,0007826	No	ns	0.9921
	27F3 vs. 27G2	-0.0001656	-0,001045 to 0,0007135	No	ns	0.9623
	SKT
	3B11 vs. 27B3	-0.0001897	-0,001069 to 0,0006893	No	ns	0.9448
	3B11 vs. 27F3	6.505e-19	-0,0008791 to 0,0008791	No	ns	>0,9999
	3B11 vs. 27G2	-0.0001438	-0,001023 to 0,0007353	No	ns	0.9748
	27B3 vs. 27F3	0.0001897	-0,0006893 to 0,001069	No	ns	0.9448
	27B3 vs. 27G2	4.599e-05	-0,0008331 to 0,0009251	No	ns	0.9991
	27F3 vs. 27G2	-0.0001438	-0,001023 to 0,0007353	No	ns	0.9748
	CTND2
	3B11 vs. 27B3	-6.426e-05	-0,0009433 to 0,0008148	No	ns	0.9976
	3B11 vs. 27F3	8.674e-19	-0,0008791 to 0,0008791	No	ns	>0,9999
	3B11 vs. 27G2	-7.38e-05	-0,0009529 to 0,0008053	No	ns	0.9964
	27B3 vs. 27F3	6.426e-05	-0,0008148 to 0,0009433	No	ns	0.9976
	27B3 vs. 27G2	-9.54e-06	-0,0008886 to 0,0008695	No	ns	>0,9999
	27F3 vs. 27G2	-7.38e-05	-0,0009529 to 0,0008053	No	ns	0.9964
	GPX4
	3B11 vs. 27B3	-0.0001281	-0,001007 to 0,0007510	No	ns	0.9819
	3B11 vs. 27F3	1.084e-18	-0,0008791 to 0,0008791	No	ns	>0,9999
	3B11 vs. 27G2	-9.481e-06	-0,0008885 to 0,0008696	No	ns	>0,9999
	27B3 vs. 27F3	0.0001281	-0,0007510 to 0,001007	No	ns	0.9819
	27B3 vs. 27G2	0.0001186	-0,0007605 to 0,0009976	No	ns	0.9856
	27F3 vs. 27G2	-9.481e-06	-0,0008885 to 0,0008696	No	ns	>0,9999
	1433S
	3B11 vs. 27B3	-0.0002626	-0,001142 to 0,0006165	No	ns	0.868
	3B11 vs. 27F3	1.301e-18	-0,0008791 to 0,0008791	No	ns	>0,9999
	3B11 vs. 27G2	-9.194e-06	-0,0008883 to 0,0008699	No	ns	>0,9999
	27B3 vs. 27F3	0.0002626	-0,0006165 to 0,001142	No	ns	0.868
	27B3 vs. 27G2	0.0002534	-0,0006257 to 0,001132	No	ns	0.8796
	27F3 vs. 27G2	-9.194e-06	-0,0008883 to 0,0008699	No	ns	>0,9999
	BSN
	3B11 vs. 27B3	-0.0009209	-0,001800 to -4,185e-005	Yes	*	0.0359
	3B11 vs. 27F3	1.518e-18	-0,0008791 to 0,0008791	No	ns	>0,9999
	3B11 vs. 27G2	-0.000191	-0,001070 to 0,0006881	No	ns	0.9438
	27B3 vs. 27F3	0.0009209	4,185e-005 to 0,001800	Yes	*	0.0359
	27B3 vs. 27G2	0.0007299	-0,0001492 to 0,001609	No	ns	0.1419
	27F3 vs. 27G2	-0.000191	-0,001070 to 0,0006881	No	ns	0.9438
	TBA1B
	3B11 vs. 27B3	-0.003588	-0,004467 to -0,002709	Yes	****	<0,0001
	3B11 vs. 27F3	2.602e-18	-0,0008791 to 0,0008791	No	ns	>0,9999
	3B11 vs. 27G2	-0.0006493	-0,001528 to 0,0002298	No	ns	0.2277
	27B3 vs. 27F3	0.003588	0,002709 to 0,004467	Yes	****	<0,0001
	27B3 vs. 27G2	0.002939	0,002060 to 0,003818	Yes	****	<0,0001
	27F3 vs. 27G2	-0.0006493	-0,001528 to 0,0002298	No	ns	0.2277
	EF1A1
	3B11 vs. 27B3	0.0003641	-0,0005150 to 0,001243	No	ns	0.7094
	3B11 vs. 27F3	8.674e-19	-0,0008791 to 0,0008791	No	ns	>0,9999
	3B11 vs. 27G2	0.000997	0,0001179 to 0,001876	Yes	*	0.0189
	27B3 vs. 27F3	-0.0003641	-0,001243 to 0,0005150	No	ns	0.7094
	27B3 vs. 27G2	0.0006329	-0,0002462 to 0,001512	No	ns	0.2487
	27F3 vs. 27G2	0.000997	0,0001179 to 0,001876	Yes	*	0.0189
	TAU
	3B11 vs. 27B3	-0.0001457	-0,001025 to 0,0007333	No	ns	0.9738
	3B11 vs. 27F3	1.084e-18	-0,0008791 to 0,0008791	No	ns	>0,9999
	3B11 vs. 27G2	-0.0001049	-0,0009839 to 0,0007742	No	ns	0.9899
	27B3 vs. 27F3	0.0001457	-0,0007333 to 0,001025	No	ns	0.9738
	27B3 vs. 27G2	4.089e-05	-0,0008382 to 0,0009200	No	ns	0.9994
	27F3 vs. 27G2	-0.0001049	-0,0009839 to 0,0007742	No	ns	0.9899
	KCC2A
	3B11 vs. 27B3	-0.009994	-0,01087 to -0,009115	Yes	****	<0,0001
	3B11 vs. 27F3	6.939e-18	-0,0008791 to 0,0008791	No	ns	>0,9999
	3B11 vs. 27G2	-0.003819	-0,004698 to -0,002940	Yes	****	<0,0001
	27B3 vs. 27F3	0.009994	0,009115 to 0,01087	Yes	****	<0,0001
	27B3 vs. 27G2	0.006175	0,005296 to 0,007054	Yes	****	<0,0001
	27F3 vs. 27G2	-0.003819	-0,004698 to -0,002940	Yes	****	<0,0001
	GLNA
	3B11 vs. 27B3	-0.0005681	-0,001447 to 0,0003109	No	ns	0.3429
	3B11 vs. 27F3	1.735e-18	-0,0008791 to 0,0008791	No	ns	>0,9999
	3B11 vs. 27G2	-0.0005062	-0,001385 to 0,0003729	No	ns	0.4478
	27B3 vs. 27F3	0.0005681	-0,0003109 to 0,001447	No	ns	0.3429
	27B3 vs. 27G2	6.195e-05	-0,0008171 to 0,0009410	No	ns	0.9979
	27F3 vs. 27G2	-0.0005062	-0,001385 to 0,0003729	No	ns	0.4478
	CADH2
	3B11 vs. 27B3	-6.056e-05	-0,0009396 to 0,0008185	No	ns	0.998
	3B11 vs. 27F3	1.301e-18	-0,0008791 to 0,0008791	No	ns	>0,9999
	3B11 vs. 27G2	-0.0002316	-0,001111 to 0,0006475	No	ns	0.9051
	27B3 vs. 27F3	6.056e-05	-0,0008185 to 0,0009396	No	ns	0.998
	27B3 vs. 27G2	-0.000171	-0,001050 to 0,0007081	No	ns	0.9587
	27F3 vs. 27G2	-0.0002316	-0,001111 to 0,0006475	No	ns	0.9051
	TPIS
	3B11 vs. 27B3	-0.0001319	-0,001011 to 0,0007472	No	ns	0.9803
	3B11 vs. 27F3	1.084e-18	-0,0008791 to 0,0008791	No	ns	>0,9999
	3B11 vs. 27G2	-6.419e-05	-0,0009433 to 0,0008149	No	ns	0.9976
	27B3 vs. 27F3	0.0001319	-0,0007472 to 0,001011	No	ns	0.9803
	27B3 vs. 27G2	6.769e-05	-0,0008114 to 0,0009468	No	ns	0.9972
	27F3 vs. 27G2	-6.419e-05	-0,0009433 to 0,0008149	No	ns	0.9976
	COF1
	3B11 vs. 27B3	-4.035e-05	-0,0009194 to 0,0008387	No	ns	0.9994
	3B11 vs. 27F3	8.674e-19	-0,0008791 to 0,0008791	No	ns	>0,9999
	3B11 vs. 27G2	-1.5e-05	-0,0008941 to 0,0008641	No	ns	>0,9999
	27B3 vs. 27F3	4.035e-05	-0,0008387 to 0,0009194	No	ns	0.9994
	27B3 vs. 27G2	2.535e-05	-0,0008537 to 0,0009044	No	ns	0.9999
	27F3 vs. 27G2	-1.5e-05	-0,0008941 to 0,0008641	No	ns	>0,9999
	BIP
	3B11 vs. 27B3	-0.001011	-0,001890 to -0,0001323	Yes	*	0.0167
	3B11 vs. 27F3	1.952e-18	-0,0008791 to 0,0008791	No	ns	>0,9999
	3B11 vs. 27G2	-0.001146	-0,002026 to -0,0002674	Yes	**	0.0046
	27B3 vs. 27F3	0.001011	0,0001323 to 0,001890	Yes	*	0.0167
	27B3 vs. 27G2	-0.0001351	-0,001014 to 0,0007439	No	ns	0.9789
	27F3 vs. 27G2	-0.001146	-0,002026 to -0,0002674	Yes	**	0.0046
	GBRA2
	3B11 vs. 27B3	-1.606e-06	-0,0008807 to 0,0008775	No	ns	>0,9999
	3B11 vs. 27F3	8.674e-19	-0,0008791 to 0,0008791	No	ns	>0,9999
	3B11 vs. 27G2	-1.975e-05	-0,0008988 to 0,0008593	No	ns	>0,9999
	27B3 vs. 27F3	1.606e-06	-0,0008775 to 0,0008807	No	ns	>0,9999
	27B3 vs. 27G2	-1.814e-05	-0,0008972 to 0,0008609	No	ns	>0,9999
	27F3 vs. 27G2	-1.975e-05	-0,0008988 to 0,0008593	No	ns	>0,9999
	KCC2B
	3B11 vs. 27B3	-0.001322	-0,002201 to -0,0004427	Yes	***	0.0007
	3B11 vs. 27F3	2.06e-18	-0,0008791 to 0,0008791	No	ns	>0,9999
	3B11 vs. 27G2	-0.0009482	-0,001827 to -6,912e-005	Yes	*	0.0287
	27B3 vs. 27F3	0.001322	0,0004427 to 0,002201	Yes	***	0.0007
	27B3 vs. 27G2	0.0003735	-0,0005055 to 0,001253	No	ns	0.6926
	27F3 vs. 27G2	-0.0009482	-0,001827 to -6,912e-005	Yes	*	0.0287
	PRDX1
	3B11 vs. 27B3	-7.86e-05	-0,0009577 to 0,0008005	No	ns	0.9957
	3B11 vs. 27F3	8.674e-19	-0,0008791 to 0,0008791	No	ns	>0,9999
	3B11 vs. 27G2	-1.567e-05	-0,0008947 to 0,0008634	No	ns	>0,9999
	27B3 vs. 27F3	7.86e-05	-0,0008005 to 0,0009577	No	ns	0.9957
	27B3 vs. 27G2	6.293e-05	-0,0008161 to 0,0009420	No	ns	0.9978
	27F3 vs. 27G2	-1.567e-05	-0,0008947 to 0,0008634	No	ns	>0,9999
	GRP75
	3B11 vs. 27B3	-0.0001245	-0,001004 to 0,0007546	No	ns	0.9834
	3B11 vs. 27F3	8.674e-19	-0,0008791 to 0,0008791	No	ns	>0,9999
	3B11 vs. 27G2	-2.534e-05	-0,0009044 to 0,0008537	No	ns	0.9999
	27B3 vs. 27F3	0.0001245	-0,0007546 to 0,001004	No	ns	0.9834
	27B3 vs. 27G2	9.916e-05	-0,0007799 to 0,0009782	No	ns	0.9914
	27F3 vs. 27G2	-2.534e-05	-0,0009044 to 0,0008537	No	ns	0.9999
	EAA2
	3B11 vs. 27B3	-0.0002407	-0,001120 to 0,0006383	No	ns	0.8947
	3B11 vs. 27F3	2.168e-19	-0,0008791 to 0,0008791	No	ns	>0,9999
	3B11 vs. 27G2	-0.0001463	-0,001025 to 0,0007328	No	ns	0.9735
	27B3 vs. 27F3	0.0002407	-0,0006383 to 0,001120	No	ns	0.8947
	27B3 vs. 27G2	9.448e-05	-0,0007846 to 0,0009735	No	ns	0.9926
	27F3 vs. 27G2	-0.0001463	-0,001025 to 0,0007328	No	ns	0.9735
	GLRB
	3B11 vs. 27B3	-0.0006933	-0,001572 to 0,0001857	No	ns	0.1773
	3B11 vs. 27F3	8.674e-19	-0,0008791 to 0,0008791	No	ns	>0,9999
	3B11 vs. 27G2	-0.0009194	-0,001798 to -4,030e-005	Yes	*	0.0364
	27B3 vs. 27F3	0.0006933	-0,0001857 to 0,001572	No	ns	0.1773
	27B3 vs. 27G2	-0.000226	-0,001105 to 0,0006530	No	ns	0.911
	27F3 vs. 27G2	-0.0009194	-0,001798 to -4,030e-005	Yes	*	0.0364
	1433G
	3B11 vs. 27B3	-0.0002706	-0,001150 to 0,0006085	No	ns	0.8574
	3B11 vs. 27F3	-6.505e-19	-0,0008791 to 0,0008791	No	ns	>0,9999
	3B11 vs. 27G2	-0.000132	-0,001011 to 0,0007471	No	ns	0.9803
	27B3 vs. 27F3	0.0002706	-0,0006085 to 0,001150	No	ns	0.8574
	27B3 vs. 27G2	0.0001386	-0,0007405 to 0,001018	No	ns	0.9773
	27F3 vs. 27G2	-0.000132	-0,001011 to 0,0007471	No	ns	0.9803
	GBRA1
	3B11 vs. 27B3	-1.652e-06	-0,0008807 to 0,0008774	No	ns	>0,9999
	3B11 vs. 27F3	2.168e-19	-0,0008791 to 0,0008791	No	ns	>0,9999
	3B11 vs. 27G2	-0.0002668	-0,001146 to 0,0006123	No	ns	0.8625
	27B3 vs. 27F3	1.652e-06	-0,0008774 to 0,0008807	No	ns	>0,9999
	27B3 vs. 27G2	-0.0002651	-0,001144 to 0,0006140	No	ns	0.8647
	27F3 vs. 27G2	-0.0002668	-0,001146 to 0,0006123	No	ns	0.8625
	HSP7C
	3B11 vs. 27B3	-0.003505	-0,004384 to -0,002626	Yes	****	<0,0001
	3B11 vs. 27F3	0	-0,0008791 to 0,0008791	No	ns	>0,9999
	3B11 vs. 27G2	8.255e-05	-0,0007965 to 0,0009616	No	ns	0.995
	27B3 vs. 27F3	0.003505	0,002626 to 0,004384	Yes	****	<0,0001
	27B3 vs. 27G2	0.003588	0,002709 to 0,004467	Yes	****	<0,0001
	27F3 vs. 27G2	8.255e-05	-0,0007965 to 0,0009616	No	ns	0.995
	GBRB3
	3B11 vs. 27B3	-8.592e-05	-0,0009650 to 0,0007931	No	ns	0.9944
	3B11 vs. 27F3	0	-0,0008791 to 0,0008791	No	ns	>0,9999
	3B11 vs. 27G2	0.0001323	-0,0007468 to 0,001011	No	ns	0.9802
	27B3 vs. 27F3	8.592e-05	-0,0007931 to 0,0009650	No	ns	0.9944
	27B3 vs. 27G2	0.0002182	-0,0006609 to 0,001097	No	ns	0.9191
	27F3 vs. 27G2	0.0001323	-0,0007468 to 0,001011	No	ns	0.9802
	MK01
	3B11 vs. 27B3	-0.0001653	-0,001044 to 0,0007137	No	ns	0.9625
	3B11 vs. 27F3	0	-0,0008791 to 0,0008791	No	ns	>0,9999
	3B11 vs. 27G2	-8.791e-05	-0,0009670 to 0,0007912	No	ns	0.994
	27B3 vs. 27F3	0.0001653	-0,0007137 to 0,001044	No	ns	0.9625
	27B3 vs. 27G2	7.743e-05	-0,0008016 to 0,0009565	No	ns	0.9959
	27F3 vs. 27G2	-8.791e-05	-0,0009670 to 0,0007912	No	ns	0.994
	DYL1
	3B11 vs. 27B3	-0.004815	-0,005694 to -0,003935	Yes	****	<0,0001
	3B11 vs. 27F3	0	-0,0008791 to 0,0008791	No	ns	>0,9999
	3B11 vs. 27G2	-0.002261	-0,003140 to -0,001382	Yes	****	<0,0001
	27B3 vs. 27F3	0.004815	0,003935 to 0,005694	Yes	****	<0,0001
	27B3 vs. 27G2	0.002553	0,001674 to 0,003432	Yes	****	<0,0001
	27F3 vs. 27G2	-0.002261	-0,003140 to -0,001382	Yes	****	<0,0001
	1433T
	3B11 vs. 27B3	-0.0007158	-0,001595 to 0,0001633	No	ns	0.1549
	3B11 vs. 27F3	-8.674e-19	-0,0008791 to 0,0008791	No	ns	>0,9999
	3B11 vs. 27G2	-0.0001686	-0,001048 to 0,0007104	No	ns	0.9603
	27B3 vs. 27F3	0.0007158	-0,0001633 to 0,001595	No	ns	0.1549
	27B3 vs. 27G2	0.0005472	-0,0003319 to 0,001426	No	ns	0.377
	27F3 vs. 27G2	-0.0001686	-0,001048 to 0,0007104	No	ns	0.9603
	1433F
	3B11 vs. 27B3	-0.0001772	-0,001056 to 0,0007019	No	ns	0.9544
	3B11 vs. 27F3	-8.674e-19	-0,0008791 to 0,0008791	No	ns	>0,9999
	3B11 vs. 27G2	-9.573e-05	-0,0009748 to 0,0007833	No	ns	0.9923
	27B3 vs. 27F3	0.0001772	-0,0007019 to 0,001056	No	ns	0.9544
	27B3 vs. 27G2	8.144e-05	-0,0007976 to 0,0009605	No	ns	0.9952
	27F3 vs. 27G2	-9.573e-05	-0,0009748 to 0,0007833	No	ns	0.9923
	EVL
	3B11 vs. 27B3	1.311e-05	-0,0008660 to 0,0008922	No	ns	>0,9999
	3B11 vs. 27F3	-1.084e-18	-0,0008791 to 0,0008791	No	ns	>0,9999
	3B11 vs. 27G2	-3.224e-07	-0,0008794 to 0,0008787	No	ns	>0,9999
	27B3 vs. 27F3	-1.311e-05	-0,0008922 to 0,0008660	No	ns	>0,9999
	27B3 vs. 27G2	-1.343e-05	-0,0008925 to 0,0008656	No	ns	>0,9999
	27F3 vs. 27G2	-3.224e-07	-0,0008794 to 0,0008787	No	ns	>0,9999
	VASP
	3B11 vs. 27B3	-9.497e-06	-0,0008886 to 0,0008696	No	ns	>0,9999
	3B11 vs. 27F3	-2.602e-18	-0,0008791 to 0,0008791	No	ns	>0,9999
	3B11 vs. 27G2	-3.555e-05	-0,0009146 to 0,0008435	No	ns	0.9996
	27B3 vs. 27F3	9.497e-06	-0,0008696 to 0,0008886	No	ns	>0,9999
	27B3 vs. 27G2	-2.605e-05	-0,0009051 to 0,0008530	No	ns	0.9998
	27F3 vs. 27G2	-3.555e-05	-0,0009146 to 0,0008435	No	ns	0.9996
	DPYL1
	3B11 vs. 27B3	-8.575e-05	-0,0009648 to 0,0007933	No	ns	0.9944
	3B11 vs. 27F3	-2.819e-18	-0,0008791 to 0,0008791	No	ns	>0,9999
	3B11 vs. 27G2	-2.352e-05	-0,0009026 to 0,0008555	No	ns	0.9999
	27B3 vs. 27F3	8.575e-05	-0,0007933 to 0,0009648	No	ns	0.9944
	27B3 vs. 27G2	6.223e-05	-0,0008168 to 0,0009413	No	ns	0.9978
	27F3 vs. 27G2	-2.352e-05	-0,0009026 to 0,0008555	No	ns	0.9999
	TBB5
	3B11 vs. 27B3	-0.001902	-0,002781 to -0,001023	Yes	****	<0,0001
	3B11 vs. 27F3	-3.903e-18	-0,0008791 to 0,0008791	No	ns	>0,9999
	3B11 vs. 27G2	0.0001621	-0,0007169 to 0,001041	No	ns	0.9645
	27B3 vs. 27F3	0.001902	0,001023 to 0,002781	Yes	****	<0,0001
	27B3 vs. 27G2	0.002064	0,001185 to 0,002943	Yes	****	<0,0001
	27F3 vs. 27G2	0.0001621	-0,0007169 to 0,001041	No	ns	0.9645
	PRDX5
	3B11 vs. 27B3	-3.229e-05	-0,0009114 to 0,0008468	No	ns	0.9997
	3B11 vs. 27F3	-1.301e-18	-0,0008791 to 0,0008791	No	ns	>0,9999
	3B11 vs. 27G2	-3.189e-05	-0,0009110 to 0,0008472	No	ns	0.9997
	27B3 vs. 27F3	3.229e-05	-0,0008468 to 0,0009114	No	ns	0.9997
	27B3 vs. 27G2	3.953e-07	-0,0008787 to 0,0008795	No	ns	>0,9999
	27F3 vs. 27G2	-3.189e-05	-0,0009110 to 0,0008472	No	ns	0.9997
	CTNB1
	3B11 vs. 27B3	-0.0001232	-0,001002 to 0,0007559	No	ns	0.9839
	3B11 vs. 27F3	-1.518e-18	-0,0008791 to 0,0008791	No	ns	>0,9999
	3B11 vs. 27G2	-0.0003138	-0,001193 to 0,0005652	No	ns	0.7941
	27B3 vs. 27F3	0.0001232	-0,0007559 to 0,001002	No	ns	0.9839
	27B3 vs. 27G2	-0.0001906	-0,001070 to 0,0006884	No	ns	0.9441
	27F3 vs. 27G2	-0.0003138	-0,001193 to 0,0005652	No	ns	0.7941
	ENAH
	3B11 vs. 27B3	-0.003451	-0,004330 to -0,002572	Yes	****	<0,0001
	3B11 vs. 27F3	0	-0,0008791 to 0,0008791	No	ns	>0,9999
	3B11 vs. 27G2	-0.006137	-0,007016 to -0,005258	Yes	****	<0,0001
	27B3 vs. 27F3	0.003451	0,002572 to 0,004330	Yes	****	<0,0001
	27B3 vs. 27G2	-0.002686	-0,003565 to -0,001807	Yes	****	<0,0001
	27F3 vs. 27G2	-0.006137	-0,007016 to -0,005258	Yes	****	<0,0001
	IQEC3
	3B11 vs. 27B3	0.01561	0,01473 to 0,01649	Yes	****	<0,0001
	3B11 vs. 27F3	0	-0,0008791 to 0,0008791	No	ns	>0,9999
	3B11 vs. 27G2	0.0166	0,01572 to 0,01748	Yes	****	<0,0001
	27B3 vs. 27F3	-0.01561	-0,01649 to -0,01473	Yes	****	<0,0001
	27B3 vs. 27G2	0.0009878	0,0001088 to 0,001867	Yes	*	0.0205
	27F3 vs. 27G2	0.0166	0,01572 to 0,01748	Yes	****	<0,0001
	FUBP2
	3B11 vs. 27B3	-0.001965	-0,002844 to -0,001086	Yes	****	<0,0001
	3B11 vs. 27F3	-1.084e-18	-0,0008791 to 0,0008791	No	ns	>0,9999
	3B11 vs. 27G2	-0.002951	-0,003830 to -0,002072	Yes	****	<0,0001
	27B3 vs. 27F3	0.001965	0,001086 to 0,002844	Yes	****	<0,0001
	27B3 vs. 27G2	-0.0009856	-0,001865 to -0,0001066	Yes	*	0.0209
	27F3 vs. 27G2	-0.002951	-0,003830 to -0,002072	Yes	****	<0,0001
	ARHG9
	3B11 vs. 27B3	-0.0001051	-0,0009841 to 0,0007740	No	ns	0.9898
	3B11 vs. 27F3	-8.674e-19	-0,0008791 to 0,0008791	No	ns	>0,9999
	3B11 vs. 27G2	-0.00135	-0,002229 to -0,0004711	Yes	***	0.0005
	27B3 vs. 27F3	0.0001051	-0,0007740 to 0,0009841	No	ns	0.9898
	27B3 vs. 27G2	-0.001245	-0,002124 to -0,0003661	Yes	**	0.0016
	27F3 vs. 27G2	-0.00135	-0,002229 to -0,0004711	Yes	***	0.0005
	IQEC2
	3B11 vs. 27B3	0.000336	-0,0005431 to 0,001215	No	ns	0.758
	3B11 vs. 27F3	-8.674e-19	-0,0008791 to 0,0008791	No	ns	>0,9999
	3B11 vs. 27G2	0.0002053	-0,0006738 to 0,001084	No	ns	0.9314
	27B3 vs. 27F3	-0.000336	-0,001215 to 0,0005431	No	ns	0.758
	27B3 vs. 27G2	-0.0001307	-0,001010 to 0,0007484	No	ns	0.9809
	27F3 vs. 27G2	0.0002053	-0,0006738 to 0,001084	No	ns	0.9314
	RHG44
	3B11 vs. 27B3	-4.15e-06	-0,0008832 to 0,0008749	No	ns	>0,9999
	3B11 vs. 27F3	-1.301e-18	-0,0008791 to 0,0008791	No	ns	>0,9999
	3B11 vs. 27G2	-6.132e-06	-0,0008852 to 0,0008729	No	ns	>0,9999
	27B3 vs. 27F3	4.15e-06	-0,0008749 to 0,0008832	No	ns	>0,9999
	27B3 vs. 27G2	-1.982e-06	-0,0008810 to 0,0008771	No	ns	>0,9999
	27F3 vs. 27G2	-6.132e-06	-0,0008852 to 0,0008729	No	ns	>0,9999
	SNTB2
	3B11 vs. 27B3	2.446e-05	-0,0008546 to 0,0009035	No	ns	0.9999
	3B11 vs. 27F3	-1.735e-18	-0,0008791 to 0,0008791	No	ns	>0,9999
	3B11 vs. 27G2	2.414e-05	-0,0008549 to 0,0009032	No	ns	0.9999
	27B3 vs. 27F3	-2.446e-05	-0,0009035 to 0,0008546	No	ns	0.9999
	27B3 vs. 27G2	-3.156e-07	-0,0008794 to 0,0008787	No	ns	>0,9999
	27F3 vs. 27G2	2.414e-05	-0,0008549 to 0,0009032	No	ns	0.9999
	CTNA2
	3B11 vs. 27B3	-0.0001275	-0,001007 to 0,0007516	No	ns	0.9822
	3B11 vs. 27F3	-1.301e-18	-0,0008791 to 0,0008791	No	ns	>0,9999
	3B11 vs. 27G2	-0.0003856	-0,001265 to 0,0004935	No	ns	0.6708
	27B3 vs. 27F3	0.0001275	-0,0007516 to 0,001007	No	ns	0.9822
	27B3 vs. 27G2	-0.0002581	-0,001137 to 0,0006210	No	ns	0.8737
	27F3 vs. 27G2	-0.0003856	-0,001265 to 0,0004935	No	ns	0.6708
	HS105
	3B11 vs. 27B3	-0.0001246	-0,001004 to 0,0007544	No	ns	0.9833
	3B11 vs. 27F3	-2.168e-18	-0,0008791 to 0,0008791	No	ns	>0,9999
	3B11 vs. 27G2	-0.0001193	-0,0009984 to 0,0007597	No	ns	0.9853
	27B3 vs. 27F3	0.0001246	-0,0007544 to 0,001004	No	ns	0.9833
	27B3 vs. 27G2	5.297e-06	-0,0008738 to 0,0008844	No	ns	>0,9999
	27F3 vs. 27G2	-0.0001193	-0,0009984 to 0,0007597	No	ns	0.9853
	NLGN2
	3B11 vs. 27B3	2.501e-05	-0,0008541 to 0,0009041	No	ns	0.9999
	3B11 vs. 27F3	-1.735e-18	-0,0008791 to 0,0008791	No	ns	>0,9999
	3B11 vs. 27G2	-0.000172	-0,001051 to 0,0007070	No	ns	0.958
	27B3 vs. 27F3	-2.501e-05	-0,0009041 to 0,0008541	No	ns	0.9999
	27B3 vs. 27G2	-0.000197	-0,001076 to 0,0006820	No	ns	0.9387
	27F3 vs. 27G2	-0.000172	-0,001051 to 0,0007070	No	ns	0.958
	MARE3
	3B11 vs. 27B3	-8.639e-06	-0,0008877 to 0,0008704	No	ns	>0,9999
	3B11 vs. 27F3	-1.952e-18	-0,0008791 to 0,0008791	No	ns	>0,9999
	3B11 vs. 27G2	-1.232e-05	-0,0008914 to 0,0008667	No	ns	>0,9999
	27B3 vs. 27F3	8.639e-06	-0,0008704 to 0,0008877	No	ns	>0,9999
	27B3 vs. 27G2	-3.681e-06	-0,0008827 to 0,0008754	No	ns	>0,9999
	27F3 vs. 27G2	-1.232e-05	-0,0008914 to 0,0008667	No	ns	>0,9999
	GLRA2
	3B11 vs. 27B3	-2.39e-07	-0,0008793 to 0,0008788	No	ns	>0,9999
	3B11 vs. 27F3	4.337e-19	-0,0008791 to 0,0008791	No	ns	>0,9999
	3B11 vs. 27G2	-0.0004832	-0,001362 to 0,0003959	No	ns	0.4894
	27B3 vs. 27F3	2.39e-07	-0,0008788 to 0,0008793	No	ns	>0,9999
	27B3 vs. 27G2	-0.0004829	-0,001362 to 0,0003961	No	ns	0.4899
	27F3 vs. 27G2	-0.0004832	-0,001362 to 0,0003959	No	ns	0.4894
	CNKR2
	3B11 vs. 27B3	-7.901e-05	-0,0009581 to 0,0008001	No	ns	0.9956
	3B11 vs. 27F3	8.674e-19	-0,0008791 to 0,0008791	No	ns	>0,9999
	3B11 vs. 27G2	-1.985e-05	-0,0008989 to 0,0008592	No	ns	>0,9999
	27B3 vs. 27F3	7.901e-05	-0,0008001 to 0,0009581	No	ns	0.9956
	27B3 vs. 27G2	5.916e-05	-0,0008199 to 0,0009382	No	ns	0.9981
	27F3 vs. 27G2	-1.985e-05	-0,0008989 to 0,0008592	No	ns	>0,9999
	RHG32
	3B11 vs. 27B3	-0.01212	-0,01300 to -0,01124	Yes	****	<0,0001
	3B11 vs. 27F3	1.735e-18	-0,0008791 to 0,0008791	No	ns	>0,9999
	3B11 vs. 27G2	-0.01316	-0,01404 to -0,01228	Yes	****	<0,0001
	27B3 vs. 27F3	0.01212	0,01124 to 0,01300	Yes	****	<0,0001
	27B3 vs. 27G2	-0.001037	-0,001916 to -0,0001583	Yes	*	0.0132
	27F3 vs. 27G2	-0.01316	-0,01404 to -0,01228	Yes	****	<0,0001
	EFTU
	3B11 vs. 27B3	-8.031e-05	-0,0009594 to 0,0007988	No	ns	0.9954
	3B11 vs. 27F3	8.674e-19	-0,0008791 to 0,0008791	No	ns	>0,9999
	3B11 vs. 27G2	2.496e-06	-0,0008766 to 0,0008816	No	ns	>0,9999
	27B3 vs. 27F3	8.031e-05	-0,0007988 to 0,0009594	No	ns	0.9954
	27B3 vs. 27G2	8.28e-05	-0,0007963 to 0,0009619	No	ns	0.995
	27F3 vs. 27G2	2.496e-06	-0,0008766 to 0,0008816	No	ns	>0,9999
	NLGN3
	3B11 vs. 27B3	-5.222e-05	-0,0009313 to 0,0008268	No	ns	0.9987
	3B11 vs. 27F3	6.505e-19	-0,0008791 to 0,0008791	No	ns	>0,9999
	3B11 vs. 27G2	-9.278e-05	-0,0009718 to 0,0007863	No	ns	0.993
	27B3 vs. 27F3	5.222e-05	-0,0008268 to 0,0009313	No	ns	0.9987
	27B3 vs. 27G2	-4.057e-05	-0,0009196 to 0,0008385	No	ns	0.9994
	27F3 vs. 27G2	-9.278e-05	-0,0009718 to 0,0007863	No	ns	0.993
	INSY1
	3B11 vs. 27B3	-3.087e-05	-0,0009099 to 0,0008482	No	ns	0.9997
	3B11 vs. 27F3	-4.337e-19	-0,0008791 to 0,0008791	No	ns	>0,9999
	3B11 vs. 27G2	-0.0001742	-0,001053 to 0,0007049	No	ns	0.9565
	27B3 vs. 27F3	3.087e-05	-0,0008482 to 0,0009099	No	ns	0.9997
	27B3 vs. 27G2	-0.0001433	-0,001022 to 0,0007358	No	ns	0.975
	27F3 vs. 27G2	-0.0001742	-0,001053 to 0,0007049	No	ns	0.9565
	SYNJ1
	3B11 vs. 27B3	-6.145e-05	-0,0009405 to 0,0008176	No	ns	0.9979
	3B11 vs. 27F3	-2.168e-19	-0,0008791 to 0,0008791	No	ns	>0,9999
	3B11 vs. 27G2	-1.03e-05	-0,0008894 to 0,0008688	No	ns	>0,9999
	27B3 vs. 27F3	6.145e-05	-0,0008176 to 0,0009405	No	ns	0.9979
	27B3 vs. 27G2	5.115e-05	-0,0008279 to 0,0009302	No	ns	0.9988
	27F3 vs. 27G2	-1.03e-05	-0,0008894 to 0,0008688	No	ns	>0,9999
	SIR2
	3B11 vs. 27B3	0.0003421	-0,0005370 to 0,001221	No	ns	0.7477
	3B11 vs. 27F3	-4.337e-19	-0,0008791 to 0,0008791	No	ns	>0,9999
	3B11 vs. 27G2	0.0003399	-0,0005392 to 0,001219	No	ns	0.7514
	27B3 vs. 27F3	-0.0003421	-0,001221 to 0,0005370	No	ns	0.7477
	27B3 vs. 27G2	-2.142e-06	-0,0008812 to 0,0008769	No	ns	>0,9999
	27F3 vs. 27G2	0.0003399	-0,0005392 to 0,001219	No	ns	0.7514
	GLRA3
	3B11 vs. 27B3	-6.942e-05	-0,0009485 to 0,0008096	No	ns	0.997
	3B11 vs. 27F3	-4.337e-19	-0,0008791 to 0,0008791	No	ns	>0,9999
	3B11 vs. 27G2	-4.478e-05	-0,0009238 to 0,0008343	No	ns	0.9992
	27B3 vs. 27F3	6.942e-05	-0,0008096 to 0,0009485	No	ns	0.997
	27B3 vs. 27G2	2.464e-05	-0,0008544 to 0,0009037	No	ns	0.9999
	27F3 vs. 27G2	-4.478e-05	-0,0009238 to 0,0008343	No	ns	0.9992
	CS044
	3B11 vs. 27B3	0.001068	0,0001888 to 0,001947	Yes	**	0.0099
	3B11 vs. 27F3	0	-0,0008791 to 0,0008791	No	ns	>0,9999
	3B11 vs. 27G2	-0.0008998	-0,001779 to -2,078e-005	Yes	*	0.0425
	27B3 vs. 27F3	-0.001068	-0,001947 to -0,0001888	Yes	**	0.0099
	27B3 vs. 27G2	-0.001968	-0,002847 to -0,001089	Yes	****	<0,0001
	27F3 vs. 27G2	-0.0008998	-0,001779 to -2,078e-005	Yes	*	0.0425
	DYL2
	3B11 vs. 27B3	-0.001491	-0,002370 to -0,0006118	Yes	****	<0,0001
	3B11 vs. 27F3	-1.735e-18	-0,0008791 to 0,0008791	No	ns	>0,9999
	3B11 vs. 27G2	0.0005937	-0,0002854 to 0,001473	No	ns	0.3036
	27B3 vs. 27F3	0.001491	0,0006118 to 0,002370	Yes	****	<0,0001
	27B3 vs. 27G2	0.002085	0,001205 to 0,002964	Yes	****	<0,0001
	27F3 vs. 27G2	0.0005937	-0,0002854 to 0,001473	No	ns	0.3036
	DTNA
	3B11 vs. 27B3	-8.815e-06	-0,0008879 to 0,0008702	No	ns	>0,9999
	3B11 vs. 27F3	-8.674e-19	-0,0008791 to 0,0008791	No	ns	>0,9999
	3B11 vs. 27G2	3.201e-05	-0,0008471 to 0,0009111	No	ns	0.9997
	27B3 vs. 27F3	8.815e-06	-0,0008702 to 0,0008879	No	ns	>0,9999
	27B3 vs. 27G2	4.082e-05	-0,0008382 to 0,0009199	No	ns	0.9994
	27F3 vs. 27G2	3.201e-05	-0,0008471 to 0,0009111	No	ns	0.9997
	TBB4A
	3B11 vs. 27B3	-0.001655	-0,002534 to -0,0007761	Yes	****	<0,0001
	3B11 vs. 27F3	-1.952e-18	-0,0008791 to 0,0008791	No	ns	>0,9999
	3B11 vs. 27G2	-6.237e-05	-0,0009414 to 0,0008167	No	ns	0.9978
	27B3 vs. 27F3	0.001655	0,0007761 to 0,002534	Yes	****	<0,0001
	27B3 vs. 27G2	0.001593	0,0007138 to 0,002472	Yes	****	<0,0001
	27F3 vs. 27G2	-6.237e-05	-0,0009414 to 0,0008167	No	ns	0.9978
	DYHC1
	3B11 vs. 27B3	-5.281e-05	-0,0009319 to 0,0008263	No	ns	0.9987
	3B11 vs. 27F3	-4.337e-19	-0,0008791 to 0,0008791	No	ns	>0,9999
	3B11 vs. 27G2	-1.639e-05	-0,0008955 to 0,0008627	No	ns	>0,9999
	27B3 vs. 27F3	5.281e-05	-0,0008263 to 0,0009319	No	ns	0.9987
	27B3 vs. 27G2	3.642e-05	-0,0008426 to 0,0009155	No	ns	0.9996
	27F3 vs. 27G2	-1.639e-05	-0,0008955 to 0,0008627	No	ns	>0,9999
	PROF2
	3B11 vs. 27B3	-0.0004104	-0,001290 to 0,0004686	No	ns	0.6249
	3B11 vs. 27F3	-6.505e-19	-0,0008791 to 0,0008791	No	ns	>0,9999
	3B11 vs. 27G2	-0.0002794	-0,001158 to 0,0005997	No	ns	0.8454
	27B3 vs. 27F3	0.0004104	-0,0004686 to 0,001290	No	ns	0.6249
	27B3 vs. 27G2	0.0001311	-0,0007480 to 0,001010	No	ns	0.9807
	27F3 vs. 27G2	-0.0002794	-0,001158 to 0,0005997	No	ns	0.8454
	PIN1
	3B11 vs. 27B3	-3.282e-05	-0,0009119 to 0,0008462	No	ns	0.9997
	3B11 vs. 27F3	-2.168e-19	-0,0008791 to 0,0008791	No	ns	>0,9999
	3B11 vs. 27G2	-5.763e-06	-0,0008848 to 0,0008733	No	ns	>0,9999
	27B3 vs. 27F3	3.282e-05	-0,0008462 to 0,0009119	No	ns	0.9997
	27B3 vs. 27G2	2.706e-05	-0,0008520 to 0,0009061	No	ns	0.9998
	27F3 vs. 27G2	-5.763e-06	-0,0008848 to 0,0008733	No	ns	>0,9999
	SEPT5
	3B11 vs. 27B3	-6.717e-05	-0,0009462 to 0,0008119	No	ns	0.9973
	3B11 vs. 27F3	0	-0,0008791 to 0,0008791	No	ns	>0,9999
	3B11 vs. 27G2	-7.143e-05	-0,0009505 to 0,0008076	No	ns	0.9967
	27B3 vs. 27F3	6.717e-05	-0,0008119 to 0,0009462	No	ns	0.9973
	27B3 vs. 27G2	-4.254e-06	-0,0008833 to 0,0008748	No	ns	>0,9999
	27F3 vs. 27G2	-7.143e-05	-0,0009505 to 0,0008076	No	ns	0.9967
	Test details	Mean 1	Mean 2	Mean Diff,	SE of diff,	N1	N2	q	DF
	AJM1
	3B11 vs. 27B3	1.373e-05	8.284e-05	-6.911e-05	0.000341	3	3	0.2866	504
	3B11 vs. 27F3	1.373e-05	1.373e-05	1.735e-18	0.000341	3	3	7.194e-15	504
	3B11 vs. 27G2	1.373e-05	0.0001793	-0.0001656	0.000341	3	3	0.6866	504
	27B3 vs. 27F3	8.284e-05	1.373e-05	6.911e-05	0.000341	3	3	0.2866	504
	27B3 vs. 27G2	8.284e-05	0.0001793	-9.646e-05	0.000341	3	3	0.4	504
	27F3 vs. 27G2	1.373e-05	0.0001793	-0.0001656	0.000341	3	3	0.6866	504
	SKT
	3B11 vs. 27B3	1.469e-05	0.0002044	-0.0001897	0.000341	3	3	0.7868	504
	3B11 vs. 27F3	1.469e-05	1.469e-05	6.505e-19	0.000341	3	3	2.698e-15	504
	3B11 vs. 27G2	1.469e-05	0.0001585	-0.0001438	0.000341	3	3	0.5961	504
	27B3 vs. 27F3	0.0002044	1.469e-05	0.0001897	0.000341	3	3	0.7868	504
	27B3 vs. 27G2	0.0002044	0.0001585	4.599e-05	0.000341	3	3	0.1907	504
	27F3 vs. 27G2	1.469e-05	0.0001585	-0.0001438	0.000341	3	3	0.5961	504
	CTND2
	3B11 vs. 27B3	1.088e-05	7.515e-05	-6.426e-05	0.000341	3	3	0.2665	504
	3B11 vs. 27F3	1.088e-05	1.088e-05	8.674e-19	0.000341	3	3	3.597e-15	504
	3B11 vs. 27G2	1.088e-05	8.469e-05	-7.38e-05	0.000341	3	3	0.3061	504
	27B3 vs. 27F3	7.515e-05	1.088e-05	6.426e-05	0.000341	3	3	0.2665	504
	27B3 vs. 27G2	7.515e-05	8.469e-05	-9.54e-06	0.000341	3	3	0.03956	504
	27F3 vs. 27G2	1.088e-05	8.469e-05	-7.38e-05	0.000341	3	3	0.3061	504
	GPX4
	3B11 vs. 27B3	0.0001055	0.0002335	-0.0001281	0.000341	3	3	0.531	504
	3B11 vs. 27F3	0.0001055	0.0001055	1.084e-18	0.000341	3	3	4.496e-15	504
	3B11 vs. 27G2	0.0001055	0.0001149	-9.481e-06	0.000341	3	3	0.03932	504
	27B3 vs. 27F3	0.0002335	0.0001055	0.0001281	0.000341	3	3	0.531	504
	27B3 vs. 27G2	0.0002335	0.0001149	0.0001186	0.000341	3	3	0.4917	504
	27F3 vs. 27G2	0.0001055	0.0001149	-9.481e-06	0.000341	3	3	0.03932	504
	1433S
	3B11 vs. 27B3	9.131e-05	0.0003539	-0.0002626	0.000341	3	3	1.089	504
	3B11 vs. 27F3	9.131e-05	9.131e-05	1.301e-18	0.000341	3	3	5.395e-15	504
	3B11 vs. 27G2	9.131e-05	0.0001005	-9.194e-06	0.000341	3	3	0.03813	504
	27B3 vs. 27F3	0.0003539	9.131e-05	0.0002626	0.000341	3	3	1.089	504
	27B3 vs. 27G2	0.0003539	0.0001005	0.0002534	0.000341	3	3	1.051	504
	27F3 vs. 27G2	9.131e-05	0.0001005	-9.194e-06	0.000341	3	3	0.03813	504
	BSN
	3B11 vs. 27B3	6.756e-05	0.0009885	-0.0009209	0.000341	3	3	3.819	504
	3B11 vs. 27F3	6.756e-05	6.756e-05	1.518e-18	0.000341	3	3	6.294e-15	504
	3B11 vs. 27G2	6.756e-05	0.0002586	-0.000191	0.000341	3	3	0.7921	504
	27B3 vs. 27F3	0.0009885	6.756e-05	0.0009209	0.000341	3	3	3.819	504
	27B3 vs. 27G2	0.0009885	0.0002586	0.0007299	0.000341	3	3	3.027	504
	27F3 vs. 27G2	6.756e-05	0.0002586	-0.000191	0.000341	3	3	0.7921	504
	TBA1B
	3B11 vs. 27B3	0.001327	0.004915	-0.003588	0.000341	3	3	14.88	504
	3B11 vs. 27F3	0.001327	0.001327	2.602e-18	0.000341	3	3	1.079e-14	504
	3B11 vs. 27G2	0.001327	0.001977	-0.0006493	0.000341	3	3	2.692	504
	27B3 vs. 27F3	0.004915	0.001327	0.003588	0.000341	3	3	14.88	504
	27B3 vs. 27G2	0.004915	0.001977	0.002939	0.000341	3	3	12.19	504
	27F3 vs. 27G2	0.001327	0.001977	-0.0006493	0.000341	3	3	2.692	504
	EF1A1
	3B11 vs. 27B3	0.001533	0.001169	0.0003641	0.000341	3	3	1.51	504
	3B11 vs. 27F3	0.001533	0.001533	8.674e-19	0.000341	3	3	3.597e-15	504
	3B11 vs. 27G2	0.001533	0.000536	0.000997	0.000341	3	3	4.134	504
	27B3 vs. 27F3	0.001169	0.001533	-0.0003641	0.000341	3	3	1.51	504
	27B3 vs. 27G2	0.001169	0.000536	0.0006329	0.000341	3	3	2.624	504
	27F3 vs. 27G2	0.001533	0.000536	0.000997	0.000341	3	3	4.134	504
	TAU
	3B11 vs. 27B3	9.107e-05	0.0002368	-0.0001457	0.000341	3	3	0.6044	504
	3B11 vs. 27F3	9.107e-05	9.107e-05	1.084e-18	0.000341	3	3	4.496e-15	504
	3B11 vs. 27G2	9.107e-05	0.0001959	-0.0001049	0.000341	3	3	0.4348	504
	27B3 vs. 27F3	0.0002368	9.107e-05	0.0001457	0.000341	3	3	0.6044	504
	27B3 vs. 27G2	0.0002368	0.0001959	4.089e-05	0.000341	3	3	0.1696	504
	27F3 vs. 27G2	9.107e-05	0.0001959	-0.0001049	0.000341	3	3	0.4348	504
	KCC2A
	3B11 vs. 27B3	0.005338	0.01533	-0.009994	0.000341	3	3	41.44	504
	3B11 vs. 27F3	0.005338	0.005338	6.939e-18	0.000341	3	3	2.877e-14	504
	3B11 vs. 27G2	0.005338	0.009157	-0.003819	0.000341	3	3	15.84	504
	27B3 vs. 27F3	0.01533	0.005338	0.009994	0.000341	3	3	41.44	504
	27B3 vs. 27G2	0.01533	0.009157	0.006175	0.000341	3	3	25.61	504
	27F3 vs. 27G2	0.005338	0.009157	-0.003819	0.000341	3	3	15.84	504
	GLNA
	3B11 vs. 27B3	0.0001323	0.0007004	-0.0005681	0.000341	3	3	2.356	504
	3B11 vs. 27F3	0.0001323	0.0001323	1.735e-18	0.000341	3	3	7.194e-15	504
	3B11 vs. 27G2	0.0001323	0.0006385	-0.0005062	0.000341	3	3	2.099	504
	27B3 vs. 27F3	0.0007004	0.0001323	0.0005681	0.000341	3	3	2.356	504
	27B3 vs. 27G2	0.0007004	0.0006385	6.195e-05	0.000341	3	3	0.2569	504
	27F3 vs. 27G2	0.0001323	0.0006385	-0.0005062	0.000341	3	3	2.099	504
	CADH2
	3B11 vs. 27B3	2.702e-05	8.758e-05	-6.056e-05	0.000341	3	3	0.2511	504
	3B11 vs. 27F3	2.702e-05	2.702e-05	1.301e-18	0.000341	3	3	5.395e-15	504
	3B11 vs. 27G2	2.702e-05	0.0002586	-0.0002316	0.000341	3	3	0.9602	504
	27B3 vs. 27F3	8.758e-05	2.702e-05	6.056e-05	0.000341	3	3	0.2511	504
	27B3 vs. 27G2	8.758e-05	0.0002586	-0.000171	0.000341	3	3	0.7091	504
	27F3 vs. 27G2	2.702e-05	0.0002586	-0.0002316	0.000341	3	3	0.9602	504
	TPIS
	3B11 vs. 27B3	6.719e-05	0.0001991	-0.0001319	0.000341	3	3	0.5469	504
	3B11 vs. 27F3	6.719e-05	6.719e-05	1.084e-18	0.000341	3	3	4.496e-15	504
	3B11 vs. 27G2	6.719e-05	0.0001314	-6.419e-05	0.000341	3	3	0.2662	504
	27B3 vs. 27F3	0.0001991	6.719e-05	0.0001319	0.000341	3	3	0.5469	504
	27B3 vs. 27G2	0.0001991	0.0001314	6.769e-05	0.000341	3	3	0.2807	504
	27F3 vs. 27G2	6.719e-05	0.0001314	-6.419e-05	0.000341	3	3	0.2662	504
	COF1
	3B11 vs. 27B3	4.342e-05	8.377e-05	-4.035e-05	0.000341	3	3	0.1673	504
	3B11 vs. 27F3	4.342e-05	4.342e-05	8.674e-19	0.000341	3	3	3.597e-15	504
	3B11 vs. 27G2	4.342e-05	5.842e-05	-1.5e-05	0.000341	3	3	0.06221	504
	27B3 vs. 27F3	8.377e-05	4.342e-05	4.035e-05	0.000341	3	3	0.1673	504
	27B3 vs. 27G2	8.377e-05	5.842e-05	2.535e-05	0.000341	3	3	0.1051	504
	27F3 vs. 27G2	4.342e-05	5.842e-05	-1.5e-05	0.000341	3	3	0.06221	504
	BIP
	3B11 vs. 27B3	0.0003473	0.001359	-0.001011	0.000341	3	3	4.194	504
	3B11 vs. 27F3	0.0003473	0.0003473	1.952e-18	0.000341	3	3	8.093e-15	504
	3B11 vs. 27G2	0.0003473	0.001494	-0.001146	0.000341	3	3	4.754	504
	27B3 vs. 27F3	0.001359	0.0003473	0.001011	0.000341	3	3	4.194	504
	27B3 vs. 27G2	0.001359	0.001494	-0.0001351	0.000341	3	3	0.5604	504
	27F3 vs. 27G2	0.0003473	0.001494	-0.001146	0.000341	3	3	4.754	504
	GBRA2
	3B11 vs. 27B3	1.615e-05	1.776e-05	-1.606e-06	0.000341	3	3	0.006661	504
	3B11 vs. 27F3	1.615e-05	1.615e-05	8.674e-19	0.000341	3	3	3.597e-15	504
	3B11 vs. 27G2	1.615e-05	3.59e-05	-1.975e-05	0.000341	3	3	0.0819	504
	27B3 vs. 27F3	1.776e-05	1.615e-05	1.606e-06	0.000341	3	3	0.006661	504
	27B3 vs. 27G2	1.776e-05	3.59e-05	-1.814e-05	0.000341	3	3	0.07524	504
	27F3 vs. 27G2	1.615e-05	3.59e-05	-1.975e-05	0.000341	3	3	0.0819	504
	KCC2B
	3B11 vs. 27B3	0.0007951	0.002117	-0.001322	0.000341	3	3	5.481	504
	3B11 vs. 27F3	0.0007951	0.0007951	2.06e-18	0.000341	3	3	8.542e-15	504
	3B11 vs. 27G2	0.0007951	0.001743	-0.0009482	0.000341	3	3	3.932	504
	27B3 vs. 27F3	0.002117	0.0007951	0.001322	0.000341	3	3	5.481	504
	27B3 vs. 27G2	0.002117	0.001743	0.0003735	0.000341	3	3	1.549	504
	27F3 vs. 27G2	0.0007951	0.001743	-0.0009482	0.000341	3	3	3.932	504
	PRDX1
	3B11 vs. 27B3	3.696e-05	0.0001156	-7.86e-05	0.000341	3	3	0.3259	504
	3B11 vs. 27F3	3.696e-05	3.696e-05	8.674e-19	0.000341	3	3	3.597e-15	504
	3B11 vs. 27G2	3.696e-05	5.263e-05	-1.567e-05	0.000341	3	3	0.06497	504
	27B3 vs. 27F3	0.0001156	3.696e-05	7.86e-05	0.000341	3	3	0.3259	504
	27B3 vs. 27G2	0.0001156	5.263e-05	6.293e-05	0.000341	3	3	0.261	504
	27F3 vs. 27G2	3.696e-05	5.263e-05	-1.567e-05	0.000341	3	3	0.06497	504
	GRP75
	3B11 vs. 27B3	2.573e-05	0.0001502	-0.0001245	0.000341	3	3	0.5163	504
	3B11 vs. 27F3	2.573e-05	2.573e-05	8.674e-19	0.000341	3	3	3.597e-15	504
	3B11 vs. 27G2	2.573e-05	5.107e-05	-2.534e-05	0.000341	3	3	0.1051	504
	27B3 vs. 27F3	0.0001502	2.573e-05	0.0001245	0.000341	3	3	0.5163	504
	27B3 vs. 27G2	0.0001502	5.107e-05	9.916e-05	0.000341	3	3	0.4112	504
	27F3 vs. 27G2	2.573e-05	5.107e-05	-2.534e-05	0.000341	3	3	0.1051	504
	EAA2
	3B11 vs. 27B3	9.63e-05	0.000337	-0.0002407	0.000341	3	3	0.9983	504
	3B11 vs. 27F3	9.63e-05	9.63e-05	2.168e-19	0.000341	3	3	8.992e-16	504
	3B11 vs. 27G2	9.63e-05	0.0002426	-0.0001463	0.000341	3	3	0.6065	504
	27B3 vs. 27F3	0.000337	9.63e-05	0.0002407	0.000341	3	3	0.9983	504
	27B3 vs. 27G2	0.000337	0.0002426	9.448e-05	0.000341	3	3	0.3918	504
	27F3 vs. 27G2	9.63e-05	0.0002426	-0.0001463	0.000341	3	3	0.6065	504
	GLRB
	3B11 vs. 27B3	0.0005087	0.001202	-0.0006933	0.000341	3	3	2.875	504
	3B11 vs. 27F3	0.0005087	0.0005087	8.674e-19	0.000341	3	3	3.597e-15	504
	3B11 vs. 27G2	0.0005087	0.001428	-0.0009194	0.000341	3	3	3.812	504
	27B3 vs. 27F3	0.001202	0.0005087	0.0006933	0.000341	3	3	2.875	504
	27B3 vs. 27G2	0.001202	0.001428	-0.000226	0.000341	3	3	0.9373	504
	27F3 vs. 27G2	0.0005087	0.001428	-0.0009194	0.000341	3	3	3.812	504
	1433G
	3B11 vs. 27B3	0.0001686	0.0004391	-0.0002706	0.000341	3	3	1.122	504
	3B11 vs. 27F3	0.0001686	0.0001686	-6.505e-19	0.000341	3	3	2.698e-15	504
	3B11 vs. 27G2	0.0001686	0.0003005	-0.000132	0.000341	3	3	0.5473	504
	27B3 vs. 27F3	0.0004391	0.0001686	0.0002706	0.000341	3	3	1.122	504
	27B3 vs. 27G2	0.0004391	0.0003005	0.0001386	0.000341	3	3	0.5748	504
	27F3 vs. 27G2	0.0001686	0.0003005	-0.000132	0.000341	3	3	0.5473	504
	GBRA1
	3B11 vs. 27B3	0.0002053	0.000207	-1.652e-06	0.000341	3	3	0.006852	504
	3B11 vs. 27F3	0.0002053	0.0002053	2.168e-19	0.000341	3	3	8.992e-16	504
	3B11 vs. 27G2	0.0002053	0.0004721	-0.0002668	0.000341	3	3	1.106	504
	27B3 vs. 27F3	0.000207	0.0002053	1.652e-06	0.000341	3	3	0.006852	504
	27B3 vs. 27G2	0.000207	0.0004721	-0.0002651	0.000341	3	3	1.099	504
	27F3 vs. 27G2	0.0002053	0.0004721	-0.0002668	0.000341	3	3	1.106	504
	HSP7C
	3B11 vs. 27B3	0.006582	0.01009	-0.003505	0.000341	3	3	14.53	504
	3B11 vs. 27F3	0.006582	0.006582	0	0.000341	3	3	0	504
	3B11 vs. 27G2	0.006582	0.006499	8.255e-05	0.000341	3	3	0.3423	504
	27B3 vs. 27F3	0.01009	0.006582	0.003505	0.000341	3	3	14.53	504
	27B3 vs. 27G2	0.01009	0.006499	0.003588	0.000341	3	3	14.88	504
	27F3 vs. 27G2	0.006582	0.006499	8.255e-05	0.000341	3	3	0.3423	504
	GBRB3
	3B11 vs. 27B3	0.0002829	0.0003689	-8.592e-05	0.000341	3	3	0.3563	504
	3B11 vs. 27F3	0.0002829	0.0002829	0	0.000341	3	3	0	504
	3B11 vs. 27G2	0.0002829	0.0001507	0.0001323	0.000341	3	3	0.5485	504
	27B3 vs. 27F3	0.0003689	0.0002829	8.592e-05	0.000341	3	3	0.3563	504
	27B3 vs. 27G2	0.0003689	0.0001507	0.0002182	0.000341	3	3	0.9048	504
	27F3 vs. 27G2	0.0002829	0.0001507	0.0001323	0.000341	3	3	0.5485	504
	MK01
	3B11 vs. 27B3	5.377e-05	0.0002191	-0.0001653	0.000341	3	3	0.6856	504
	3B11 vs. 27F3	5.377e-05	5.377e-05	0	0.000341	3	3	0	504
	3B11 vs. 27G2	5.377e-05	0.0001417	-8.791e-05	0.000341	3	3	0.3645	504
	27B3 vs. 27F3	0.0002191	5.377e-05	0.0001653	0.000341	3	3	0.6856	504
	27B3 vs. 27G2	0.0002191	0.0001417	7.743e-05	0.000341	3	3	0.3211	504
	27F3 vs. 27G2	5.377e-05	0.0001417	-8.791e-05	0.000341	3	3	0.3645	504
	DYL1
	3B11 vs. 27B3	0.01278	0.01759	-0.004815	0.000341	3	3	19.96	504
	3B11 vs. 27F3	0.01278	0.01278	0	0.000341	3	3	0	504
	3B11 vs. 27G2	0.01278	0.01504	-0.002261	0.000341	3	3	9.376	504
	27B3 vs. 27F3	0.01759	0.01278	0.004815	0.000341	3	3	19.96	504
	27B3 vs. 27G2	0.01759	0.01504	0.002553	0.000341	3	3	10.59	504
	27F3 vs. 27G2	0.01278	0.01504	-0.002261	0.000341	3	3	9.376	504
	1433T
	3B11 vs. 27B3	0.0005041	0.00122	-0.0007158	0.000341	3	3	2.968	504
	3B11 vs. 27F3	0.0005041	0.0005041	-8.674e-19	0.000341	3	3	3.597e-15	504
	3B11 vs. 27G2	0.0005041	0.0006727	-0.0001686	0.000341	3	3	0.6993	504
	27B3 vs. 27F3	0.00122	0.0005041	0.0007158	0.000341	3	3	2.968	504
	27B3 vs. 27G2	0.00122	0.0006727	0.0005472	0.000341	3	3	2.269	504
	27F3 vs. 27G2	0.0005041	0.0006727	-0.0001686	0.000341	3	3	0.6993	504
	1433F
	3B11 vs. 27B3	6.119e-05	0.0002384	-0.0001772	0.000341	3	3	0.7347	504
	3B11 vs. 27F3	6.119e-05	6.119e-05	-8.674e-19	0.000341	3	3	3.597e-15	504
	3B11 vs. 27G2	6.119e-05	0.0001569	-9.573e-05	0.000341	3	3	0.397	504
	27B3 vs. 27F3	0.0002384	6.119e-05	0.0001772	0.000341	3	3	0.7347	504
	27B3 vs. 27G2	0.0002384	0.0001569	8.144e-05	0.000341	3	3	0.3377	504
	27F3 vs. 27G2	6.119e-05	0.0001569	-9.573e-05	0.000341	3	3	0.397	504
	EVL
	3B11 vs. 27B3	3.797e-05	2.486e-05	1.311e-05	0.000341	3	3	0.05435	504
	3B11 vs. 27F3	3.797e-05	3.797e-05	-1.084e-18	0.000341	3	3	4.496e-15	504
	3B11 vs. 27G2	3.797e-05	3.829e-05	-3.224e-07	0.000341	3	3	0.001337	504
	27B3 vs. 27F3	2.486e-05	3.797e-05	-1.311e-05	0.000341	3	3	0.05435	504
	27B3 vs. 27G2	2.486e-05	3.829e-05	-1.343e-05	0.000341	3	3	0.05569	504
	27F3 vs. 27G2	3.797e-05	3.829e-05	-3.224e-07	0.000341	3	3	0.001337	504
	VASP
	3B11 vs. 27B3	1.473e-05	2.423e-05	-9.497e-06	0.000341	3	3	0.03938	504
	3B11 vs. 27F3	1.473e-05	1.473e-05	-2.602e-18	0.000341	3	3	1.079e-14	504
	3B11 vs. 27G2	1.473e-05	5.028e-05	-3.555e-05	0.000341	3	3	0.1474	504
	27B3 vs. 27F3	2.423e-05	1.473e-05	9.497e-06	0.000341	3	3	0.03938	504
	27B3 vs. 27G2	2.423e-05	5.028e-05	-2.605e-05	0.000341	3	3	0.108	504
	27F3 vs. 27G2	1.473e-05	5.028e-05	-3.555e-05	0.000341	3	3	0.1474	504
	DPYL1
	3B11 vs. 27B3	1.659e-05	0.0001023	-8.575e-05	0.000341	3	3	0.3556	504
	3B11 vs. 27F3	1.659e-05	1.659e-05	-2.819e-18	0.000341	3	3	1.169e-14	504
	3B11 vs. 27G2	1.659e-05	4.011e-05	-2.352e-05	0.000341	3	3	0.09753	504
	27B3 vs. 27F3	0.0001023	1.659e-05	8.575e-05	0.000341	3	3	0.3556	504
	27B3 vs. 27G2	0.0001023	4.011e-05	6.223e-05	0.000341	3	3	0.2581	504
	27F3 vs. 27G2	1.659e-05	4.011e-05	-2.352e-05	0.000341	3	3	0.09753	504
	TBB5
	3B11 vs. 27B3	0.0005222	0.002424	-0.001902	0.000341	3	3	7.887	504
	3B11 vs. 27F3	0.0005222	0.0005222	-3.903e-18	0.000341	3	3	1.619e-14	504
	3B11 vs. 27G2	0.0005222	0.00036	0.0001621	0.000341	3	3	0.6723	504
	27B3 vs. 27F3	0.002424	0.0005222	0.001902	0.000341	3	3	7.887	504
	27B3 vs. 27G2	0.002424	0.00036	0.002064	0.000341	3	3	8.559	504
	27F3 vs. 27G2	0.0005222	0.00036	0.0001621	0.000341	3	3	0.6723	504
	PRDX5
	3B11 vs. 27B3	0.0001886	0.0002209	-3.229e-05	0.000341	3	3	0.1339	504
	3B11 vs. 27F3	0.0001886	0.0001886	-1.301e-18	0.000341	3	3	5.395e-15	504
	3B11 vs. 27G2	0.0001886	0.0002205	-3.189e-05	0.000341	3	3	0.1322	504
	27B3 vs. 27F3	0.0002209	0.0001886	3.229e-05	0.000341	3	3	0.1339	504
	27B3 vs. 27G2	0.0002209	0.0002205	3.953e-07	0.000341	3	3	0.001639	504
	27F3 vs. 27G2	0.0001886	0.0002205	-3.189e-05	0.000341	3	3	0.1322	504
	CTNB1
	3B11 vs. 27B3	6.647e-05	0.0001897	-0.0001232	0.000341	3	3	0.5109	504
	3B11 vs. 27F3	6.647e-05	6.647e-05	-1.518e-18	0.000341	3	3	6.294e-15	504
	3B11 vs. 27G2	6.647e-05	0.0003803	-0.0003138	0.000341	3	3	1.301	504
	27B3 vs. 27F3	0.0001897	6.647e-05	0.0001232	0.000341	3	3	0.5109	504
	27B3 vs. 27G2	0.0001897	0.0003803	-0.0001906	0.000341	3	3	0.7905	504
	27F3 vs. 27G2	6.647e-05	0.0003803	-0.0003138	0.000341	3	3	1.301	504
	ENAH
	3B11 vs. 27B3	0.009195	0.01265	-0.003451	0.000341	3	3	14.31	504
	3B11 vs. 27F3	0.009195	0.009195	0	0.000341	3	3	0	504
	3B11 vs. 27G2	0.009195	0.01533	-0.006137	0.000341	3	3	25.45	504
	27B3 vs. 27F3	0.01265	0.009195	0.003451	0.000341	3	3	14.31	504
	27B3 vs. 27G2	0.01265	0.01533	-0.002686	0.000341	3	3	11.14	504
	27F3 vs. 27G2	0.009195	0.01533	-0.006137	0.000341	3	3	25.45	504
	IQEC3
	3B11 vs. 27B3	0.03977	0.02416	0.01561	0.000341	3	3	64.73	504
	3B11 vs. 27F3	0.03977	0.03977	0	0.000341	3	3	0	504
	3B11 vs. 27G2	0.03977	0.02318	0.0166	0.000341	3	3	68.82	504
	27B3 vs. 27F3	0.02416	0.03977	-0.01561	0.000341	3	3	64.73	504
	27B3 vs. 27G2	0.02416	0.02318	0.0009878	0.000341	3	3	4.096	504
	27F3 vs. 27G2	0.03977	0.02318	0.0166	0.000341	3	3	68.82	504
	FUBP2
	3B11 vs. 27B3	0.0006711	0.002636	-0.001965	0.000341	3	3	8.149	504
	3B11 vs. 27F3	0.0006711	0.0006711	-1.084e-18	0.000341	3	3	4.496e-15	504
	3B11 vs. 27G2	0.0006711	0.003622	-0.002951	0.000341	3	3	12.24	504
	27B3 vs. 27F3	0.002636	0.0006711	0.001965	0.000341	3	3	8.149	504
	27B3 vs. 27G2	0.002636	0.003622	-0.0009856	0.000341	3	3	4.087	504
	27F3 vs. 27G2	0.0006711	0.003622	-0.002951	0.000341	3	3	12.24	504
	ARHG9
	3B11 vs. 27B3	0.000578	0.000683	-0.0001051	0.000341	3	3	0.4357	504
	3B11 vs. 27F3	0.000578	0.000578	-8.674e-19	0.000341	3	3	3.597e-15	504
	3B11 vs. 27G2	0.000578	0.001928	-0.00135	0.000341	3	3	5.599	504
	27B3 vs. 27F3	0.000683	0.000578	0.0001051	0.000341	3	3	0.4357	504
	27B3 vs. 27G2	0.000683	0.001928	-0.001245	0.000341	3	3	5.163	504
	27F3 vs. 27G2	0.000578	0.001928	-0.00135	0.000341	3	3	5.599	504
	IQEC2
	3B11 vs. 27B3	0.0006079	0.0002719	0.000336	0.000341	3	3	1.393	504
	3B11 vs. 27F3	0.0006079	0.0006079	-8.674e-19	0.000341	3	3	3.597e-15	504
	3B11 vs. 27G2	0.0006079	0.0004026	0.0002053	0.000341	3	3	0.8513	504
	27B3 vs. 27F3	0.0002719	0.0006079	-0.000336	0.000341	3	3	1.393	504
	27B3 vs. 27G2	0.0002719	0.0004026	-0.0001307	0.000341	3	3	0.5419	504
	27F3 vs. 27G2	0.0006079	0.0004026	0.0002053	0.000341	3	3	0.8513	504
	RHG44
	3B11 vs. 27B3	2.581e-06	6.732e-06	-4.15e-06	0.000341	3	3	0.01721	504
	3B11 vs. 27F3	2.581e-06	2.581e-06	-1.301e-18	0.000341	3	3	5.395e-15	504
	3B11 vs. 27G2	2.581e-06	8.714e-06	-6.132e-06	0.000341	3	3	0.02543	504
	27B3 vs. 27F3	6.732e-06	2.581e-06	4.15e-06	0.000341	3	3	0.01721	504
	27B3 vs. 27G2	6.732e-06	8.714e-06	-1.982e-06	0.000341	3	3	0.008218	504
	27F3 vs. 27G2	2.581e-06	8.714e-06	-6.132e-06	0.000341	3	3	0.02543	504
	SNTB2
	3B11 vs. 27B3	6.599e-05	4.153e-05	2.446e-05	0.000341	3	3	0.1014	504
	3B11 vs. 27F3	6.599e-05	6.599e-05	-1.735e-18	0.000341	3	3	7.194e-15	504
	3B11 vs. 27G2	6.599e-05	4.185e-05	2.414e-05	0.000341	3	3	0.1001	504
	27B3 vs. 27F3	4.153e-05	6.599e-05	-2.446e-05	0.000341	3	3	0.1014	504
	27B3 vs. 27G2	4.153e-05	4.185e-05	-3.156e-07	0.000341	3	3	0.001309	504
	27F3 vs. 27G2	6.599e-05	4.185e-05	2.414e-05	0.000341	3	3	0.1001	504
	CTNA2
	3B11 vs. 27B3	4.556e-05	0.000173	-0.0001275	0.000341	3	3	0.5285	504
	3B11 vs. 27F3	4.556e-05	4.556e-05	-1.301e-18	0.000341	3	3	5.395e-15	504
	3B11 vs. 27G2	4.556e-05	0.0004311	-0.0003856	0.000341	3	3	1.599	504
	27B3 vs. 27F3	0.000173	4.556e-05	0.0001275	0.000341	3	3	0.5285	504
	27B3 vs. 27G2	0.000173	0.0004311	-0.0002581	0.000341	3	3	1.07	504
	27F3 vs. 27G2	4.556e-05	0.0004311	-0.0003856	0.000341	3	3	1.599	504
	HS105
	3B11 vs. 27B3	0.000323	0.0004477	-0.0001246	0.000341	3	3	0.5168	504
	3B11 vs. 27F3	0.000323	0.000323	-2.168e-18	0.000341	3	3	8.992e-15	504
	3B11 vs. 27G2	0.000323	0.0004424	-0.0001193	0.000341	3	3	0.4948	504
	27B3 vs. 27F3	0.0004477	0.000323	0.0001246	0.000341	3	3	0.5168	504
	27B3 vs. 27G2	0.0004477	0.0004424	5.297e-06	0.000341	3	3	0.02197	504
	27F3 vs. 27G2	0.000323	0.0004424	-0.0001193	0.000341	3	3	0.4948	504
	NLGN2
	3B11 vs. 27B3	0.0001828	0.0001578	2.501e-05	0.000341	3	3	0.1037	504
	3B11 vs. 27F3	0.0001828	0.0001828	-1.735e-18	0.000341	3	3	7.194e-15	504
	3B11 vs. 27G2	0.0001828	0.0003549	-0.000172	0.000341	3	3	0.7134	504
	27B3 vs. 27F3	0.0001578	0.0001828	-2.501e-05	0.000341	3	3	0.1037	504
	27B3 vs. 27G2	0.0001578	0.0003549	-0.000197	0.000341	3	3	0.8171	504
	27F3 vs. 27G2	0.0001828	0.0003549	-0.000172	0.000341	3	3	0.7134	504
	MARE3
	3B11 vs. 27B3	6.925e-06	1.556e-05	-8.639e-06	0.000341	3	3	0.03583	504
	3B11 vs. 27F3	6.925e-06	6.925e-06	-1.952e-18	0.000341	3	3	8.093e-15	504
	3B11 vs. 27G2	6.925e-06	1.925e-05	-1.232e-05	0.000341	3	3	0.05109	504
	27B3 vs. 27F3	1.556e-05	6.925e-06	8.639e-06	0.000341	3	3	0.03583	504
	27B3 vs. 27G2	1.556e-05	1.925e-05	-3.681e-06	0.000341	3	3	0.01526	504
	27F3 vs. 27G2	6.925e-06	1.925e-05	-1.232e-05	0.000341	3	3	0.05109	504
	GLRA2
	3B11 vs. 27B3	0.0004603	0.0004606	-2.39e-07	0.000341	3	3	0.0009911	504
	3B11 vs. 27F3	0.0004603	0.0004603	4.337e-19	0.000341	3	3	1.798e-15	504
	3B11 vs. 27G2	0.0004603	0.0009435	-0.0004832	0.000341	3	3	2.004	504
	27B3 vs. 27F3	0.0004606	0.0004603	2.39e-07	0.000341	3	3	0.0009911	504
	27B3 vs. 27G2	0.0004606	0.0009435	-0.0004829	0.000341	3	3	2.003	504
	27F3 vs. 27G2	0.0004603	0.0009435	-0.0004832	0.000341	3	3	2.004	504
	CNKR2
	3B11 vs. 27B3	1.003e-05	8.904e-05	-7.901e-05	0.000341	3	3	0.3276	504
	3B11 vs. 27F3	1.003e-05	1.003e-05	8.674e-19	0.000341	3	3	3.597e-15	504
	3B11 vs. 27G2	1.003e-05	2.989e-05	-1.985e-05	0.000341	3	3	0.08232	504
	27B3 vs. 27F3	8.904e-05	1.003e-05	7.901e-05	0.000341	3	3	0.3276	504
	27B3 vs. 27G2	8.904e-05	2.989e-05	5.916e-05	0.000341	3	3	0.2453	504
	27F3 vs. 27G2	1.003e-05	2.989e-05	-1.985e-05	0.000341	3	3	0.08232	504
	RHG32
	3B11 vs. 27B3	0.002431	0.01455	-0.01212	0.000341	3	3	50.27	504
	3B11 vs. 27F3	0.002431	0.002431	1.735e-18	0.000341	3	3	7.194e-15	504
	3B11 vs. 27G2	0.002431	0.01559	-0.01316	0.000341	3	3	54.58	504
	27B3 vs. 27F3	0.01455	0.002431	0.01212	0.000341	3	3	50.27	504
	27B3 vs. 27G2	0.01455	0.01559	-0.001037	0.000341	3	3	4.302	504
	27F3 vs. 27G2	0.002431	0.01559	-0.01316	0.000341	3	3	54.58	504
	EFTU
	3B11 vs. 27B3	5.472e-05	0.000135	-8.031e-05	0.000341	3	3	0.333	504
	3B11 vs. 27F3	5.472e-05	5.472e-05	8.674e-19	0.000341	3	3	3.597e-15	504
	3B11 vs. 27G2	5.472e-05	5.222e-05	2.496e-06	0.000341	3	3	0.01035	504
	27B3 vs. 27F3	0.000135	5.472e-05	8.031e-05	0.000341	3	3	0.333	504
	27B3 vs. 27G2	0.000135	5.222e-05	8.28e-05	0.000341	3	3	0.3434	504
	27F3 vs. 27G2	5.472e-05	5.222e-05	2.496e-06	0.000341	3	3	0.01035	504
	NLGN3
	3B11 vs. 27B3	4.764e-05	9.985e-05	-5.222e-05	0.000341	3	3	0.2165	504
	3B11 vs. 27F3	4.764e-05	4.764e-05	6.505e-19	0.000341	3	3	2.698e-15	504
	3B11 vs. 27G2	4.764e-05	0.0001404	-9.278e-05	0.000341	3	3	0.3848	504
	27B3 vs. 27F3	9.985e-05	4.764e-05	5.222e-05	0.000341	3	3	0.2165	504
	27B3 vs. 27G2	9.985e-05	0.0001404	-4.057e-05	0.000341	3	3	0.1682	504
	27F3 vs. 27G2	4.764e-05	0.0001404	-9.278e-05	0.000341	3	3	0.3848	504
	INSY1
	3B11 vs. 27B3	0.0001966	0.0002275	-3.087e-05	0.000341	3	3	0.128	504
	3B11 vs. 27F3	0.0001966	0.0001966	-4.337e-19	0.000341	3	3	1.798e-15	504
	3B11 vs. 27G2	0.0001966	0.0003708	-0.0001742	0.000341	3	3	0.7222	504
	27B3 vs. 27F3	0.0002275	0.0001966	3.087e-05	0.000341	3	3	0.128	504
	27B3 vs. 27G2	0.0002275	0.0003708	-0.0001433	0.000341	3	3	0.5942	504
	27F3 vs. 27G2	0.0001966	0.0003708	-0.0001742	0.000341	3	3	0.7222	504
	SYNJ1
	3B11 vs. 27B3	5.467e-05	0.0001161	-6.145e-05	0.000341	3	3	0.2548	504
	3B11 vs. 27F3	5.467e-05	5.467e-05	-2.168e-19	0.000341	3	3	8.992e-16	504
	3B11 vs. 27G2	5.467e-05	6.496e-05	-1.03e-05	0.000341	3	3	0.0427	504
	27B3 vs. 27F3	0.0001161	5.467e-05	6.145e-05	0.000341	3	3	0.2548	504
	27B3 vs. 27G2	0.0001161	6.496e-05	5.115e-05	0.000341	3	3	0.2121	504
	27F3 vs. 27G2	5.467e-05	6.496e-05	-1.03e-05	0.000341	3	3	0.0427	504
	SIR2
	3B11 vs. 27B3	0.0005519	0.0002099	0.0003421	0.000341	3	3	1.418	504
	3B11 vs. 27F3	0.0005519	0.0005519	-4.337e-19	0.000341	3	3	1.798e-15	504
	3B11 vs. 27G2	0.0005519	0.000212	0.0003399	0.000341	3	3	1.41	504
	27B3 vs. 27F3	0.0002099	0.0005519	-0.0003421	0.000341	3	3	1.418	504
	27B3 vs. 27G2	0.0002099	0.000212	-2.142e-06	0.000341	3	3	0.008881	504
	27F3 vs. 27G2	0.0005519	0.000212	0.0003399	0.000341	3	3	1.41	504
	GLRA3
	3B11 vs. 27B3	4.176e-05	0.0001112	-6.942e-05	0.000341	3	3	0.2879	504
	3B11 vs. 27F3	4.176e-05	4.176e-05	-4.337e-19	0.000341	3	3	1.798e-15	504
	3B11 vs. 27G2	4.176e-05	8.654e-05	-4.478e-05	0.000341	3	3	0.1857	504
	27B3 vs. 27F3	0.0001112	4.176e-05	6.942e-05	0.000341	3	3	0.2879	504
	27B3 vs. 27G2	0.0001112	8.654e-05	2.464e-05	0.000341	3	3	0.1022	504
	27F3 vs. 27G2	4.176e-05	8.654e-05	-4.478e-05	0.000341	3	3	0.1857	504
	CS044
	3B11 vs. 27B3	0.001975	0.0009072	0.001068	0.000341	3	3	4.428	504
	3B11 vs. 27F3	0.001975	0.001975	0	0.000341	3	3	0	504
	3B11 vs. 27G2	0.001975	0.002875	-0.0008998	0.000341	3	3	3.731	504
	27B3 vs. 27F3	0.0009072	0.001975	-0.001068	0.000341	3	3	4.428	504
	27B3 vs. 27G2	0.0009072	0.002875	-0.001968	0.000341	3	3	8.16	504
	27F3 vs. 27G2	0.001975	0.002875	-0.0008998	0.000341	3	3	3.731	504
	DYL2
	3B11 vs. 27B3	0.002109	0.0036	-0.001491	0.000341	3	3	6.182	504
	3B11 vs. 27F3	0.002109	0.002109	-1.735e-18	0.000341	3	3	7.194e-15	504
	3B11 vs. 27G2	0.002109	0.001516	0.0005937	0.000341	3	3	2.462	504
	27B3 vs. 27F3	0.0036	0.002109	0.001491	0.000341	3	3	6.182	504
	27B3 vs. 27G2	0.0036	0.001516	0.002085	0.000341	3	3	8.644	504
	27F3 vs. 27G2	0.002109	0.001516	0.0005937	0.000341	3	3	2.462	504
	DTNA
	3B11 vs. 27B3	0.0001164	0.0001252	-8.815e-06	0.000341	3	3	0.03656	504
	3B11 vs. 27F3	0.0001164	0.0001164	-8.674e-19	0.000341	3	3	3.597e-15	504
	3B11 vs. 27G2	0.0001164	8.443e-05	3.201e-05	0.000341	3	3	0.1327	504
	27B3 vs. 27F3	0.0001252	0.0001164	8.815e-06	0.000341	3	3	0.03656	504
	27B3 vs. 27G2	0.0001252	8.443e-05	4.082e-05	0.000341	3	3	0.1693	504
	27F3 vs. 27G2	0.0001164	8.443e-05	3.201e-05	0.000341	3	3	0.1327	504
	TBB4A
	3B11 vs. 27B3	0.0004392	0.002094	-0.001655	0.000341	3	3	6.864	504
	3B11 vs. 27F3	0.0004392	0.0004392	-1.952e-18	0.000341	3	3	8.093e-15	504
	3B11 vs. 27G2	0.0004392	0.0005016	-6.237e-05	0.000341	3	3	0.2586	504
	27B3 vs. 27F3	0.002094	0.0004392	0.001655	0.000341	3	3	6.864	504
	27B3 vs. 27G2	0.002094	0.0005016	0.001593	0.000341	3	3	6.605	504
	27F3 vs. 27G2	0.0004392	0.0005016	-6.237e-05	0.000341	3	3	0.2586	504
	DYHC1
	3B11 vs. 27B3	8.832e-06	6.164e-05	-5.281e-05	0.000341	3	3	0.219	504
	3B11 vs. 27F3	8.832e-06	8.832e-06	-4.337e-19	0.000341	3	3	1.798e-15	504
	3B11 vs. 27G2	8.832e-06	2.522e-05	-1.639e-05	0.000341	3	3	0.06797	504
	27B3 vs. 27F3	6.164e-05	8.832e-06	5.281e-05	0.000341	3	3	0.219	504
	27B3 vs. 27G2	6.164e-05	2.522e-05	3.642e-05	0.000341	3	3	0.151	504
	27F3 vs. 27G2	8.832e-06	2.522e-05	-1.639e-05	0.000341	3	3	0.06797	504
	PROF2
	3B11 vs. 27B3	0.0006502	0.001061	-0.0004104	0.000341	3	3	1.702	504
	3B11 vs. 27F3	0.0006502	0.0006502	-6.505e-19	0.000341	3	3	2.698e-15	504
	3B11 vs. 27G2	0.0006502	0.0009296	-0.0002794	0.000341	3	3	1.159	504
	27B3 vs. 27F3	0.001061	0.0006502	0.0004104	0.000341	3	3	1.702	504
	27B3 vs. 27G2	0.001061	0.0009296	0.0001311	0.000341	3	3	0.5435	504
	27F3 vs. 27G2	0.0006502	0.0009296	-0.0002794	0.000341	3	3	1.159	504
	PIN1
	3B11 vs. 27B3	5.016e-05	8.299e-05	-3.282e-05	0.000341	3	3	0.1361	504
	3B11 vs. 27F3	5.016e-05	5.016e-05	-2.168e-19	0.000341	3	3	8.992e-16	504
	3B11 vs. 27G2	5.016e-05	5.592e-05	-5.763e-06	0.000341	3	3	0.0239	504
	27B3 vs. 27F3	8.299e-05	5.016e-05	3.282e-05	0.000341	3	3	0.1361	504
	27B3 vs. 27G2	8.299e-05	5.592e-05	2.706e-05	0.000341	3	3	0.1122	504
	27F3 vs. 27G2	5.016e-05	5.592e-05	-5.763e-06	0.000341	3	3	0.0239	504
	SEPT5
	3B11 vs. 27B3	2.71e-05	9.427e-05	-6.717e-05	0.000341	3	3	0.2785	504
	3B11 vs. 27F3	2.71e-05	2.71e-05	0	0.000341	3	3	0	504
	3B11 vs. 27G2	2.71e-05	9.852e-05	-7.143e-05	0.000341	3	3	0.2962	504
	27B3 vs. 27F3	9.427e-05	2.71e-05	6.717e-05	0.000341	3	3	0.2785	504
	27B3 vs. 27G2	9.427e-05	9.852e-05	-4.254e-06	0.000341	3	3	0.01764	504
	27F3 vs. 27G2	2.71e-05	9.852e-05	-7.143e-05	0.000341	3	3	0.2962	504
