# Supplementary material for: A DARPin-based molecular toolset to probe gephyrin and inhibitory synapse biology
Source: eLife journal article supplement (doi:10.7554/elife.80895), 2022-10-31
Supplement: supp [file elife-80895-supp-v1.zip › elife_poa_e80895_Figure_6_source_data_3.xlsx]

## Sheet: Panel B
	Figure 6 - Source Data 3: values and statistical analysis for HEK293T cell assay to determine DARPin binding to gephyrin mutant constructs (comparing full length P1 gephyrin versions containin S268A/270A or S268E/S270E point mutations).
	Slopes (used for plotting)
	Control DARPin (E3_5)										DARPin 27B3										DARPin 27F3										DARPin 27G2										Antibody 3B11
	WT	G-C Domain	E Domain								WT	G-C Domain	E Domain								WT	G-C Domain	E Domain								WT	G-C Domain	E Domain								WT	G-C Domain	E Domain
	0.0008	0.0096	0.0008								0.9508	1.1645	1.1442								0.4085	0.3308	0.5591								0.4554	0.4271	0.4026								0.5986	1.1048	0.991
	-0.0029	0.0079	0.0107								0.9754	0.9814	1.056								0.3452	0.4962	0.3869								0.5292	0.4909	0.6296								1.0408	0.6742	0.4329
	-0.0018	0.0018	0.0006								1.0148	1.0039	0.9958								0.538	0.3792	0.3741								0.5585	0.4905	0.5947								1.6712	0.8618	1.5424
	Statistical analysis										Statistical analysis										Statistical analysis										Statistical analysis										Statistical analysis
	ANOVA summary										ANOVA summary										ANOVA summary										ANOVA summary										ANOVA summary
	F	2.622									F	1.113									F	0.1275									F	0.6352									F	0.174
	P value	0.1519									P value	0.388									P value	0.8826									P value	0.5621									P value	0.8444
	P value summary	ns									P value summary	ns									P value summary	ns									P value summary	ns									P value summary	ns
	Significant diff. among means (P < 0.05)?	No									Significant diff. among means (P < 0.05)?	No									Significant diff. among means (P < 0.05)?	No									Significant diff. among means (P < 0.05)?	No									Significant diff. among means (P < 0.05)?	No
	R square	0.4664									R square	0.2706									R square	0.04078									R square	0.1747									R square	0.05481
	Brown-Forsythe test										Brown-Forsythe test										Brown-Forsythe test										Brown-Forsythe test										Brown-Forsythe test
	F (DFn, DFd)	0,2409 (2, 6)									F (DFn, DFd)	0,3756 (2, 6)									F (DFn, DFd)	0,01182 (2, 6)									F (DFn, DFd)	0,5503 (2, 6)									F (DFn, DFd)	0,6520 (2, 6)
	P value	0.7932									P value	0.7019									P value	0.9883									P value	0.6034									P value	0.5544
	P value summary	ns									P value summary	ns									P value summary	ns									P value summary	ns									P value summary	ns
	Are SDs significantly different (P < 0.05)?	No									Are SDs significantly different (P < 0.05)?	No									Are SDs significantly different (P < 0.05)?	No									Are SDs significantly different (P < 0.05)?	No									Are SDs significantly different (P < 0.05)?	No
	Bartlett's test										Bartlett's test										Bartlett's test										Bartlett's test										Bartlett's test
	Bartlett's statistic (corrected)										Bartlett's statistic (corrected)										Bartlett's statistic (corrected)										Bartlett's statistic (corrected)										Bartlett's statistic (corrected)
	P value										P value										P value										P value										P value
	P value summary										P value summary										P value summary										P value summary										P value summary
	Are SDs significantly different (P < 0.05)?										Are SDs significantly different (P < 0.05)?										Are SDs significantly different (P < 0.05)?										Are SDs significantly different (P < 0.05)?										Are SDs significantly different (P < 0.05)?
	ANOVA table	SS	DF	MS	F (DFn, DFd)	P value					ANOVA table	SS	DF	MS	F (DFn, DFd)	P value					ANOVA table	SS	DF	MS	F (DFn, DFd)	P value					ANOVA table	SS	DF	MS	F (DFn, DFd)						ANOVA table	SS	DF	MS	F (DFn, DFd)	P value
	Treatment (between columns)	9.401e-05	2	4.7e-05	F (2, 6) = 2,622	P=0,1519					Treatment (between columns)	0.01231	2	0.006153	F (2, 6) = 1,113	P=0,3880					Treatment (between columns)	0.002343	2	0.001172	F (2, 6) = 0,1275	P=0,8826					Treatment (between columns)	0.008093	2	0.004047	F (2, 6) = 0,6352						Treatment (between columns)	0.07479	2	0.0374	F (2, 6) = 0,1740	P=0,8444
	Residual (within columns)	0.0001076	6	1.793e-05							Residual (within columns)	0.03317	6	0.005528							Residual (within columns)	0.05513	6	0.009188							Residual (within columns)	0.03822	6	0.006371							Residual (within columns)	1.29	6	0.215
	Total	0.0002016	8								Total	0.04547	8								Total	0.05747	8								Total	0.04632	8								Total	1.365	8
	Data summary										Data summary										Data summary										Data summary										Data summary
	Number of treatments (columns)	3									Number of treatments (columns)	3									Number of treatments (columns)	3									Number of treatments (columns)	3									Number of treatments (columns)	3
	Number of values (total)	9									Number of values (total)	9									Number of values (total)	9									Number of values (total)	9									Number of values (total)	9

## Sheet: Panel C
	Figure 6 - Source Data 3: values and statistical analysis for HEK293T cell assay to determine DARPin binding to gephyrin mutant constructs (comparing full length P1 gephyrin to the GC domain or E domain).
	Slopes (used for plotting)
	Control DARPin (E3_5)										DARPin 27B3										DARPin 27F3										DARPin 27G2										Antibody 3B11
	WT	G-C Domain	E Domain								WT	G-C Domain	E Domain								WT	G-C Domain	E Domain								WT	G-C Domain	E Domain								WT	G-C Domain	E Domain
	0.0105	0.0056	0.0004								0.5355	1.0192	0.0061								1.0404	0.0014	0.022								0.2608	0.4603	-0.0007								1.0852	0.0023	2.6233
	0.0007	0.0026	0.0012								0.7007	0.8566	-0.0131								1.0512	0.0037	0.0333								0.4221	0.3373	-0.0011								1.6412	0.0051	2.0541
	-0.0021	-0.0009	0.0066								0.7106	0.6035	0.0078								0.874	0.0011	0.0327								0.3413	0.2085	0.0038								0.8592	0.0192	1.4706
	Statistical analysis										Statistical analysis										Statistical analysis										Statistical analysis										Statistical analysis
	ANOVA summary										ANOVA summary										ANOVA summary										ANOVA summary										ANOVA summary
	F	0.01232									F	31.7									F	286.7									F	15.3									F	19.12
	P value	0.9878									P value	0.0006									P value	<0,0001									P value	0.0044									P value	0.0025
	P value summary	ns									P value summary	***									P value summary	****									P value summary	**									P value summary	**
	Significant diff. among means (P < 0.05)?	No									Significant diff. among means (P < 0.05)?	Yes									Significant diff. among means (P < 0.05)?	Yes									Significant diff. among means (P < 0.05)?	Yes									Significant diff. among means (P < 0.05)?	Yes
	R square	0.004091									R square	0.9136									R square	0.9896									R square	0.8361									R square	0.8644
	Brown-Forsythe test										Brown-Forsythe test										Brown-Forsythe test										Brown-Forsythe test										Brown-Forsythe test
	F (DFn, DFd)	0,3473 (2, 6)									F (DFn, DFd)	1,574 (2, 6)									F (DFn, DFd)	1,112 (2, 6)									F (DFn, DFd)	2,090 (2, 6)									F (DFn, DFd)	1,775 (2, 6)
	P value	0.7199									P value	0.2821									P value	0.3884									P value	0.2048									P value	0.248
	P value summary	ns									P value summary	ns									P value summary	ns									P value summary	ns									P value summary	ns
	Are SDs significantly different (P < 0.05)?	No									Are SDs significantly different (P < 0.05)?	No									Are SDs significantly different (P < 0.05)?	No									Are SDs significantly different (P < 0.05)?	No									Are SDs significantly different (P < 0.05)?	No
	Bartlett's test										Bartlett's test										Bartlett's test										Bartlett's test										Bartlett's test
	Bartlett's statistic (corrected)										Bartlett's statistic (corrected)										Bartlett's statistic (corrected)										Bartlett's statistic (corrected)										Bartlett's statistic (corrected)
	P value										P value										P value										P value										P value
	P value summary										P value summary										P value summary										P value summary										P value summary
	Are SDs significantly different (P < 0.05)?										Are SDs significantly different (P < 0.05)?										Are SDs significantly different (P < 0.05)?										Are SDs significantly different (P < 0.05)?										Are SDs significantly different (P < 0.05)?
	ANOVA table	SS	DF	MS	F (DFn, DFd)	P value					ANOVA table	SS	DF	MS	F (DFn, DFd)	P value					ANOVA table	SS	DF	MS	F (DFn, DFd)	P value					ANOVA table	SS	DF	MS	F (DFn, DFd)	P value					ANOVA table	SS	DF	MS	F (DFn, DFd)	P value
	Treatment (between columns)	5.4e-07	2	2.7e-07	F (2, 6) = 0,01232	P=0,9878					Treatment (between columns)	1.135	2	0.5674	F (2, 6) = 31,70	P=0,0006					Treatment (between columns)	1.894	2	0.947	F (2, 6) = 286,7	P<0,0001					Treatment (between columns)	0.2282	2	0.1141	F (2, 6) = 15,30	P=0,0044					Treatment (between columns)	6.3	2	3.15	F (2, 6) = 19,12	P=0,0025
	Residual (within columns)	0.0001315	6	2.191e-05							Residual (within columns)	0.1074	6	0.0179							Residual (within columns)	0.01982	6	0.003303							Residual (within columns)	0.04473	6	0.007455							Residual (within columns)	0.9885	6	0.1647
	Total	0.000132	8								Total	1.242	8								Total	1.914	8								Total	0.2729	8								Total	7.289	8
	Multiple comparisons										Data summary										Data summary										Data summary										Data summary
											Number of treatments (columns)	3									Number of treatments (columns)	3									Number of treatments (columns)	3									Number of treatments (columns)	3
	Number of families	1									Number of values (total)	9									Number of values (total)	9									Number of values (total)	9									Number of values (total)	9
	Number of comparisons per family	3
	Alpha	0.05									Multiple comparisons										Multiple comparisons										Multiple comparisons										Multiple comparisons
	Tukey's multiple comparisons test	Mean Diff,	95,00% CI of diff,	Significant?	Summary	Adjusted P Value					Number of families	1									Number of families	1									Number of families	1									Number of families	1
	WT vs. G-C Domain	0.0006	-0,01113 to 0,01233	No	ns	0.9865	A-B				Number of comparisons per family	3									Number of comparisons per family	3									Number of comparisons per family	3									Number of comparisons per family	3
	WT vs. E Domain	0.0003	-0,01143 to 0,01203	No	ns	0.9966	A-C				Alpha	0.05									Alpha	0.05									Alpha	0.05									Alpha	0.05
	G-C Domain vs. E Domain	-0.0003	-0,01203 to 0,01143	No	ns	0.9966	B-C
											Tukey's multiple comparisons test	Mean Diff,	95,00% CI of diff,	Significant?	Summary	Adjusted P Value					Tukey's multiple comparisons test	Mean Diff,	95,00% CI of diff,	Significant?	Summary	Adjusted P Value					Tukey's multiple comparisons test	Mean Diff,	95,00% CI of diff,	Significant?	Summary	Adjusted P Value					Tukey's multiple comparisons test	Mean Diff,	95,00% CI of diff,	Significant?	Summary	Adjusted P Value
	Test details	Mean 1	Mean 2	Mean Diff,	SE of diff,	n1	n2	q	DF		WT vs. G-C Domain	-0.1775	-0,5127 to 0,1577	No	ns	0.3067	A-B				WT vs. G-C Domain	0.9865	0,8425 to 1,130	Yes	****	<0,0001	A-B				WT vs. G-C Domain	0.006033	-0,2103 to 0,2223	No	ns	0.996	A-B				WT vs. G-C Domain	1.186	0,1695 to 2,203	Yes	*	0.027	A-B
	WT vs. G-C Domain	0.003033	0.002433	0.0006	0.003822	3	3	0.222	6		WT vs. E Domain	0.6487	0,3135 to 0,9838	Yes	**	0.0025	A-C				WT vs. E Domain	0.9592	0,8152 to 1,103	Yes	****	<0,0001	A-C				WT vs. E Domain	0.3407	0,1244 to 0,5570	Yes	**	0.0069	A-C				WT vs. E Domain	-0.8541	-1,871 to 0,1627	No	ns	0.0925	A-C
	WT vs. E Domain	0.003033	0.002733	0.0003	0.003822	3	3	0.111	6		G-C Domain vs. E Domain	0.8262	0,4910 to 1,161	Yes	***	0.0007	B-C				G-C Domain vs. E Domain	-0.02727	-0,1713 to 0,1167	No	ns	0.8349	B-C				G-C Domain vs. E Domain	0.3347	0,1184 to 0,5510	Yes	**	0.0076	B-C				G-C Domain vs. E Domain	-2.04	-3,057 to -1,024	Yes	**	0.002	B-C
	G-C Domain vs. E Domain	0.002433	0.002733	-0.0003	0.003822	3	3	0.111	6
											Test details	Mean 1	Mean 2	Mean Diff,	SE of diff,	n1	n2	q	DF		Test details	Mean 1	Mean 2	Mean Diff,	SE of diff,	n1	n2	q	DF		Test details	Mean 1	Mean 2	Mean Diff,	SE of diff,	n1	n2	q	DF		Test details	Mean 1	Mean 2	Mean Diff,	SE of diff,	n1	n2	q	DF
											WT vs. G-C Domain	0.6489	0.8264	-0.1775	0.1092	3	3	2.298	6		WT vs. G-C Domain	0.9885	0.002067	0.9865	0.04693	3	3	29.73	6		WT vs. G-C Domain	0.3414	0.3354	0.006033	0.0705	3	3	0.121	6		WT vs. G-C Domain	1.195	0.008867	1.186	0.3314	3	3	5.062	6
											WT vs. E Domain	0.6489	0.0002667	0.6487	0.1092	3	3	8.398	6		WT vs. E Domain	0.9885	0.02933	0.9592	0.04693	3	3	28.91	6		WT vs. E Domain	0.3414	0.0006667	0.3407	0.0705	3	3	6.835	6		WT vs. E Domain	1.195	2.049	-0.8541	0.3314	3	3	3.645	6
											G-C Domain vs. E Domain	0.8264	0.0002667	0.8262	0.1092	3	3	10.7	6		G-C Domain vs. E Domain	0.002067	0.02933	-0.02727	0.04693	3	3	0.8217	6		G-C Domain vs. E Domain	0.3354	0.0006667	0.3347	0.0705	3	3	6.714	6		G-C Domain vs. E Domain	0.008867	2.049	-2.04	0.3314	3	3	8.707	6

## Sheet: Panel D
	Figure 6 - Source Data 3: values and statistical analysis for HEK293T cell assay to determine DARPin binding to gephyrin mutant constructs (comparing full length P1 gephyrin to the variants containing the C3 or C4a cassettes).
	Slopes (used for plotting)
	Control DARPin (E3_5)										DARPin 27B3										DARPin 27F3										DARPin 27G2										Antibody 3B11
	WT	G-C Domain	E Domain								WT	G-C Domain	E Domain								WT	G-C Domain	E Domain								WT	G-C Domain	E Domain								WT	G-C Domain	E Domain
	0.0022	0.0024	0.0058								1.8472	1.0725	0.0163								2.4259	0.2553	0.3963								1.2019	0.7314	0.0844								1.2802	0.8615	1.0795
	0.007	0.0051	0.004								1.4779	1.1859	0.0128								2.2153	0.2179	0.3875								1.9733	1.3752	0.083								2.0496	1.3768	1.6461
	0.0082	0.0068	0.0036								1.4371	2.1285	0.089								2.793	0.2169	0.245								2.0628	0.6667	0.107								0.9039	0.7639	1.0552
	Statistical analysis										Statistical analysis										Statistical analysis										Statistical analysis										Statistical analysis
	ANOVA summary										ANOVA summary										ANOVA summary										ANOVA summary										ANOVA summary
	F	0.2689									F	17.11									F	155									F	16.31									ANOVA summary
	P value	0.773									P value	0.0033									P value	<0,0001									P value	0.0038									F	0.6913
	P value summary	ns									P value summary	**									P value summary	****									P value summary	**									P value	0.5368
	Significant diff. among means (P < 0.05)?	No									Significant diff. among means (P < 0.05)?	Yes									Significant diff. among means (P < 0.05)?	Yes									Significant diff. among means (P < 0.05)?	Yes									P value summary	ns
	R square	0.08225									R square	0.8508									R square	0.981									R square	0.8446									Significant diff. among means (P < 0.05)?	No
																																									R square	0.1873
	Brown-Forsythe test										Brown-Forsythe test										Brown-Forsythe test										Brown-Forsythe test
	F (DFn, DFd)	0,4046 (2, 6)									F (DFn, DFd)	0,8069 (2, 6)									F (DFn, DFd)	1,985 (2, 6)									F (DFn, DFd)	0,6539 (2, 6)									Brown-Forsythe test
	P value	0.6842									P value	0.4894									P value	0.218									P value	0.5534									F (DFn, DFd)	0,3032 (2, 6)
	P value summary	ns									P value summary	ns									P value summary	ns									P value summary	ns									P value	0.7492
	Are SDs significantly different (P < 0.05)?	No									Are SDs significantly different (P < 0.05)?	No									Are SDs significantly different (P < 0.05)?	No									Are SDs significantly different (P < 0.05)?	No									P value summary	ns
																																									Are SDs significantly different (P < 0.05)?	No
	Bartlett's test										Bartlett's test										Bartlett's test										Bartlett's test
	Bartlett's statistic (corrected)										Bartlett's statistic (corrected)										Bartlett's statistic (corrected)										Bartlett's statistic (corrected)										Bartlett's test
	P value										P value										P value										P value										Bartlett's statistic (corrected)
	P value summary										P value summary										P value summary										P value summary										P value
	Are SDs significantly different (P < 0.05)?										Are SDs significantly different (P < 0.05)?										Are SDs significantly different (P < 0.05)?										Are SDs significantly different (P < 0.05)?										P value summary
																																									Are SDs significantly different (P < 0.05)?
	ANOVA table	SS	DF	MS	F (DFn, DFd)	P value					ANOVA table	SS	DF	MS	F (DFn, DFd)	P value					ANOVA table	SS	DF	MS	F (DFn, DFd)	P value					ANOVA table	SS	DF	MS	F (DFn, DFd)	P value
	Treatment (between columns)	2.936e-06	2	1.468e-06	F (2, 6) = 0,2689	P=0,7730					Treatment (between columns)	4.437	2	2.218	F (2, 6) = 17,11	P=0,0033					Treatment (between columns)	9.625	2	4.813	F (2, 6) = 155,0	P<0,0001					Treatment (between columns)	4.106	2	2.053	F (2, 6) = 16,31	P=0,0038					ANOVA table	SS	DF	MS	F (DFn, DFd)	P value
	Residual (within columns)	3.275e-05	6	5.459e-06							Residual (within columns)	0.7779	6	0.1297							Residual (within columns)	0.1863	6	0.03106							Residual (within columns)	0.7553	6	0.1259							Treatment (between columns)	0.2587	2	0.1293	F (2, 6) = 0,6913	P=0,5368
	Total	3.569e-05	8								Total	5.215	8								Total	9.812	8								Total	4.862	8								Residual (within columns)	1.123	6	0.1871
																																									Total	1.381	8
	Data summary										Data summary										Data summary										Data summary
	Number of treatments (columns)	3									Number of treatments (columns)	3									Number of treatments (columns)	3									Number of treatments (columns)	3									Data summary
	Number of values (total)	9									Number of values (total)	9									Number of values (total)	9									Number of values (total)	9									Number of treatments (columns)	3
																																									Number of values (total)	9
											Multiple comparisons										Multiple comparisons										Multiple comparisons										Multiple comparisons
											Number of families	1									Number of families	1									Number of families	1
											Number of comparisons per family	3									Number of comparisons per family	3									Number of comparisons per family	3
											Alpha	0.05									Alpha	0.05									Alpha	0.05
											Tukey's multiple comparisons test	Mean Diff,	95,00% CI of diff,	Significant?	Summary	Adjusted P Value					Tukey's multiple comparisons test	Mean Diff,	95,00% CI of diff,	Significant?	Summary	Adjusted P Value					Tukey's multiple comparisons test	Mean Diff,	95,00% CI of diff,	Significant?	Summary	Adjusted P Value
											WT vs. C3	0.1251	-0,7770 to 1,027	No	ns	0.9065	A-B				WT vs. C3	2.248	1,807 to 2,690	Yes	****	<0,0001	A-B				WT vs. C3	0.8216	-0,06730 to 1,710	No	ns	0.0667	A-B
											WT vs. C4a	1.548	0,6460 to 2,450	Yes	**	0.0045	A-C				WT vs. C4a	2.135	1,694 to 2,577	Yes	****	<0,0001	A-C				WT vs. C4a	1.655	0,7657 to 2,543	Yes	**	0.003	A-C
											C3 vs. C4a	1.423	0,5209 to 2,325	Yes	**	0.0069	B-C				C3 vs. C4a	-0.1129	-0,5544 to 0,3286	No	ns	0.7254	B-C				C3 vs. C4a	0.833	-0,05590 to 1,722	No	ns	0.0635	B-C
											Test details	Mean 1	Mean 2	Mean Diff,	SE of diff,	n1	n2	q	DF		Test details	Mean 1	Mean 2	Mean Diff,	SE of diff,	n1	n2	q	DF		Test details	Mean 1	Mean 2	Mean Diff,	SE of diff,	n1	n2	q	DF
											WT vs. C3	1.587	1.462	0.1251	0.294	3	3	0.6018	6		WT vs. C3	2.478	0.23	2.248	0.1439	3	3	22.09	6		WT vs. C3	1.746	0.9244	0.8216	0.2897	3	3	4.011	6
											WT vs. C4a	1.587	0.03937	1.548	0.294	3	3	7.446	6		WT vs. C4a	2.478	0.3429	2.135	0.1439	3	3	20.99	6		WT vs. C4a	1.746	0.09147	1.655	0.2897	3	3	8.077	6
											C3 vs. C4a	1.462	0.03937	1.423	0.294	3	3	6.845	6		C3 vs. C4a	0.23	0.3429	-0.1129	0.1439	3	3	1.11	6		C3 vs. C4a	0.9244	0.09147	0.833	0.2897	3	3	4.066	6
