# Supplementary material for: A DARPin-based molecular toolset to probe gephyrin and inhibitory synapse biology
Source: eLife journal article supplement (doi:10.7554/elife.80895), 2022-10-31
Supplement: supp [file elife-80895-supp-v1.zip › elife_poa_e80895_Figure_6_source_data_4.xlsx]

## Sheet: Panel
	Figure 6 -Source Data 4: Values used for heat map plotting in Figure 6 Supplement 3
	For heat map plotting, values are log2 FC of each value relative to the row average (e.g. Average abundance value for each protein).
	Glial ontoloy
		27B3	27B3	27B3	27F3	27F3	27F3	27G2	27G2	27G2
	TAU	-0.303187	0.767032	0.639235	-1.44675	-0.968047	-0.544333	0.00213049	-0.751987	0.824771
	GLNA	0.19974	0.632668	0.66553	-1.79985	-1.65246	-2.28855	-0.692769	0.559394	0.858085
	EAA2	1.10328	0.822502	-0.804902	-1.00091	-1.11134	-1.63988	-0.359091	0.519486	0.0203096
	FMR1	-0.0429822	0.0857809	-0.0467847
	GFAP	0.523702	1.09424	0.936768				-2.82187	-2.25612	-2.62273
	SIR2	-0.414187	-0.481154	-1.08459	0.971968	0.644233	0.657828	-1.28689	-0.316323	-0.421685
	Myelin sheath ontology
		27B3	27B3	27B3	27F3	27F3	27F3	27G2	27G2	27G2
	DPYL2	0.506762	0.536375	0.890136	-0.548012	-1.1656	-0.831664	-0.28416	-0.0421866	-0.337436
	ADT1	0.372824	0.10109	0.0819198				-0.757843	0.112486	-0.149383
	ADT2	0.724478	0.56663	0.616315				-0.960958	-1.84596	-0.884178
	TBA1B	0.84814	0.878279	0.802074	-1.21131	-0.859219	-1.08744	-0.62293	-0.118314	-0.752206
	NFL	1.11723	0.905647	0.968926	-1.42255	-2.82871	-1.78189	-1.09069	-0.0599054	-0.383719
	AT1A1	0.731899	-0.119879	-0.401315				-0.256725	0.147839	-0.480257
	AT1A3	0.236324	0.336499	0.204893				-1.02025	0.468048	-0.914692
	AT1B1	0.376888	0.780557	0.542663				0.00831119	-1.27613	-3.20649
	CN37	0.666851	1.24415	1.2153	-1.9808	-1.21296	-1.8849	-1.06132	-0.370884	-0.960954
	CLH1	0.604285	0.96378	0.521422				-1.46223	-0.893572	-2.37496
	CMC1	1.04285	0.87479	0.991297				-4.63647	-4.96042	-4.45259
	AINX	0.772064	1.03113	1.09828	-1.90169	-2.04945	-2.12064	-0.502525	-0.104083	-0.449576
	DYN1	-0.49294	0.692902	-0.432715				-2.01085	1.2158	-1.46912
	HSP7C	0.259424	0.432369	0.456267	-0.324077	-0.244589	-0.129816	-0.259287	-0.218043	-0.269652
	G3P	0.253925	0.374524	0.293537				-0.500742	-0.276764	-0.408671
	TBB4B	1.02755	0.965205	0.907126	-1.30196	-1.4643	-1.50205	-0.673488	-0.202546	-0.952472
	GFAP	0.523702	1.09424	0.936768				-2.82187	-2.25612	-2.62273
	GNB5	0.929546	-0.151423	0.279042				-1.20035	-0.356457	-0.385863
	MBP	0.727648	0.612851	0.867333				-2.05872	-1.84025	-1.0856
	NFH	0.29279	-0.347421	-0.426583				0.0952434	0.202022	0.0376324
	ODPA	0.552531	0.846463	0.596848				-0.529164	-1.31056	-2.9802
	RS27A	0.59991	0.526055	0.540557				-1.50026	-0.922356	-0.496712
	SDHA	-1.66114	0.453046	-0.906714				0.254415	0.098514	0.602136
	SPTN1	0.197626	0.919071	0.181948				-1.0011	-0.11602	-1.30212
	SYN2	0.636475	0.509174	-0.0152356				-0.228957	-0.106119	-1.99765
	TBB4A	0.892533	1.02787	1.21071	-0.849258	-1.08767	-1.85116	-0.248404	-1.46354	-1.82192
	TCPG	0.661256	-0.320924	0.565289				-2.94194	-0.00557089	0.0172397
	THY1	0.0669704	0.306796	0.413928				-0.655309	0.30863	-0.97214
