# Supplementary figures and images for: A DARPin-based molecular toolset to probe gephyrin and inhibitory synapse biology
Source: eLife journal article supplement (doi:10.7554/elife.80895), 2022-10-31

Regulated interactors

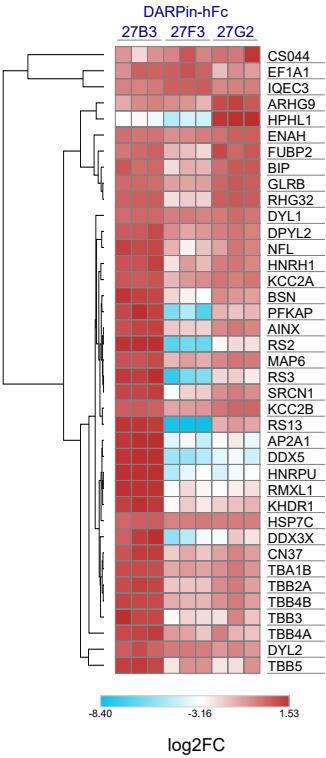

Supplement: supp [file elife-80895-supp-v1.zip]

Anti-FLAG ELISA Assay

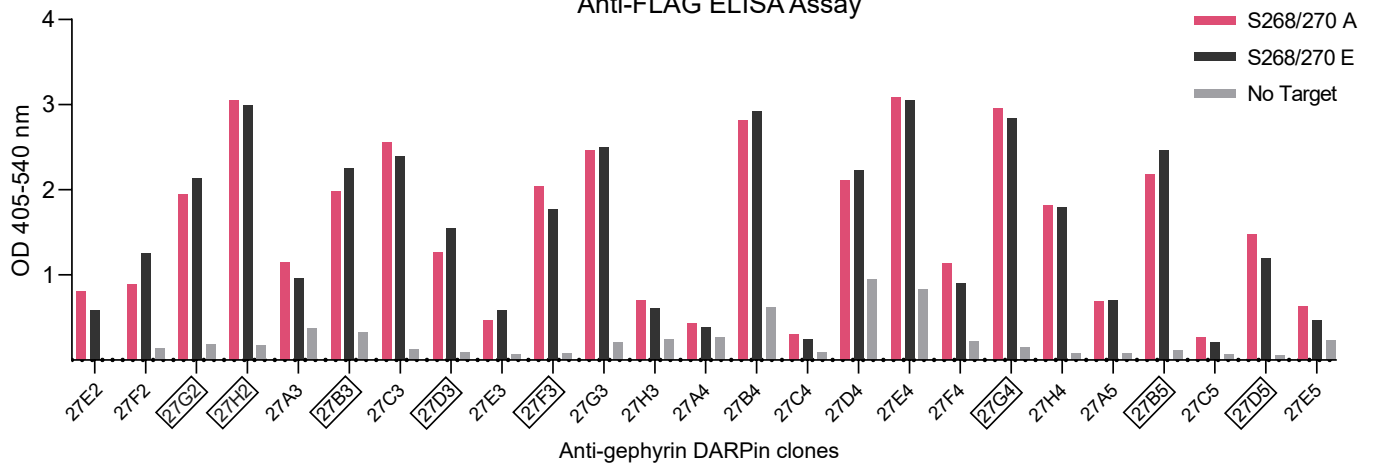

Supplement: supp [file elife-80895-supp-v1.zip › elife_poa_e80895_Figure_1_figure_supplement_1.pdf]

DARPin-hFc structure

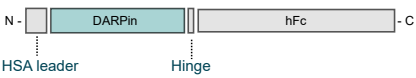

Supplement: supp [file elife-80895-supp-v1.zip › elife_poa_e80895_Figure_3_figure_supplement_1.pdf]

Hippocampal neuron culture

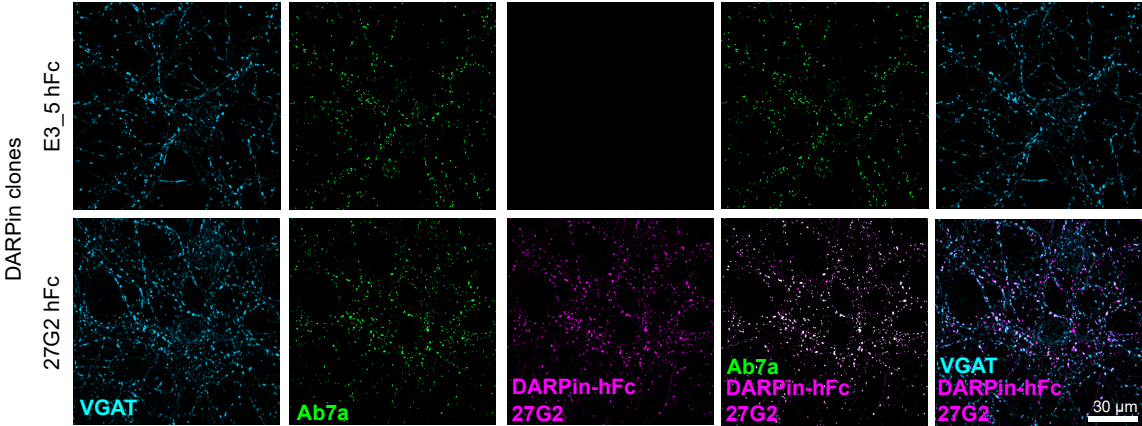

Adult somatosensory cortex

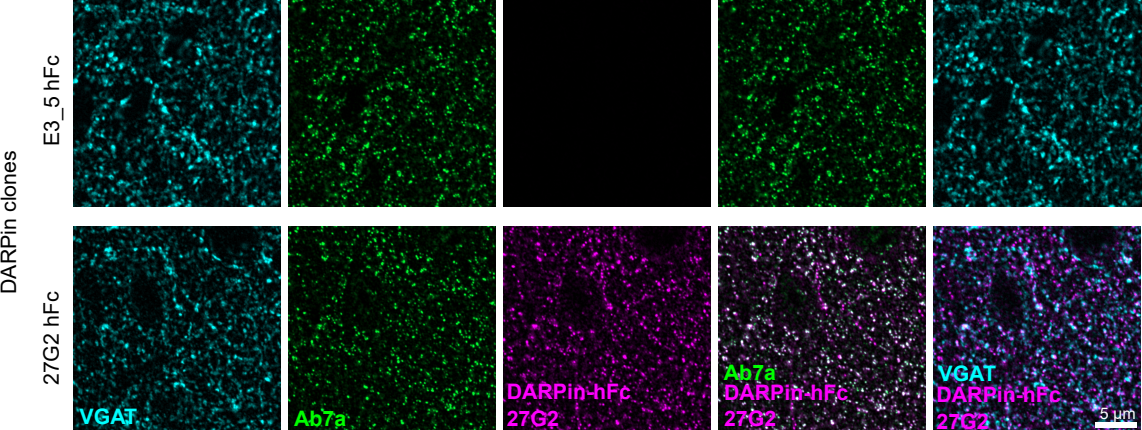

Supplement: supp [file elife-80895-supp-v1.zip › elife_poa_e80895_Figure_3_figure_supplement_2.pdf]

Pre-blocking with recombinant P1 gephyrin

Gephyrin  
Pre-incubation

No  
Treatment

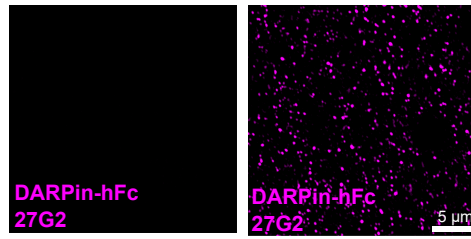

Supplement: supp [file elife-80895-supp-v1.zip › elife_poa_e80895_Figure_3_figure_supplement_3.pdf]

pS270 distributions by neuron

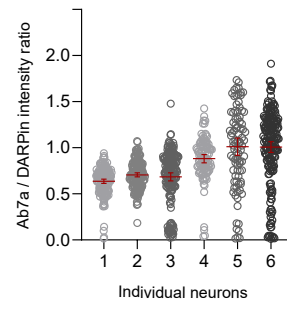

Supplement: supp [file elife-80895-supp-v1.zip › elife_poa_e80895_Figure_3_figure_supplement_4.pdf]

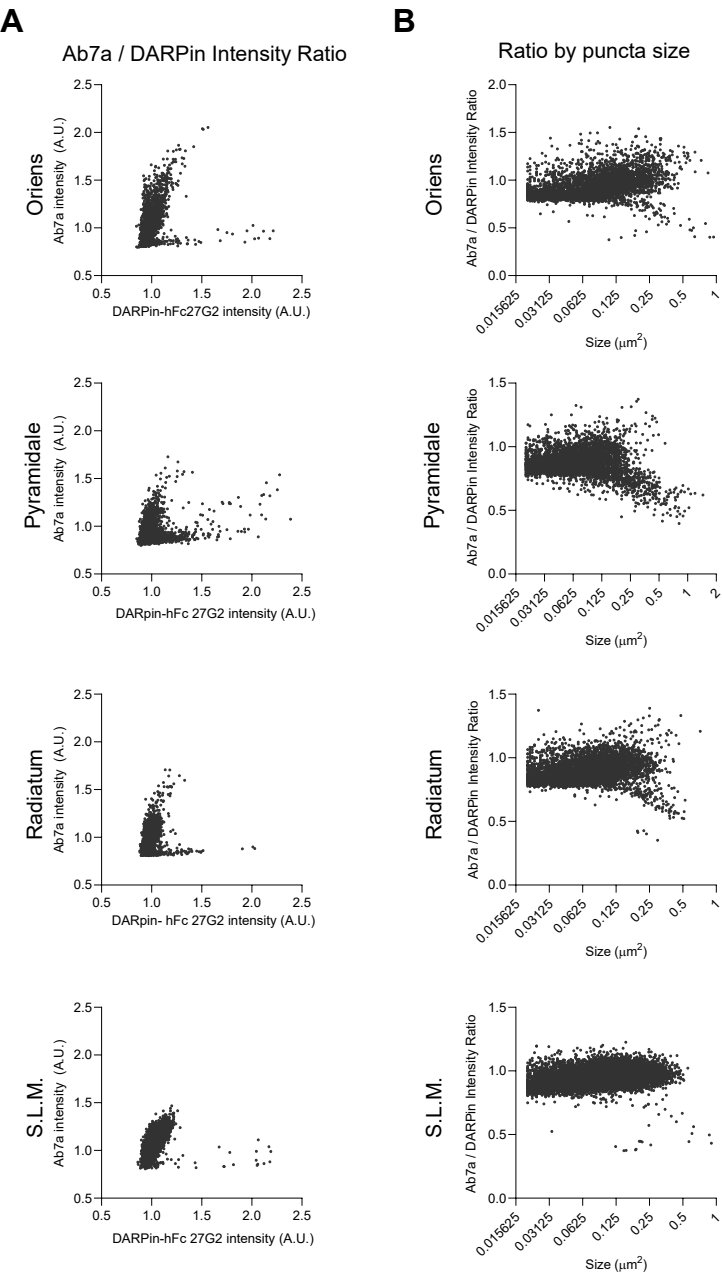

Supplement: supp [file elife-80895-supp-v1.zip › elife_poa_e80895_Figure_4_figure_supplement_1.pdf]

**A****IP Gephyrin (mouse brain lysate)**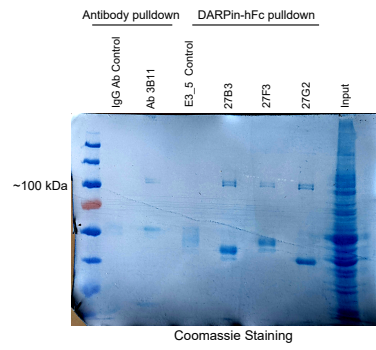**B****IP Gephyrin (mouse brain lysate)**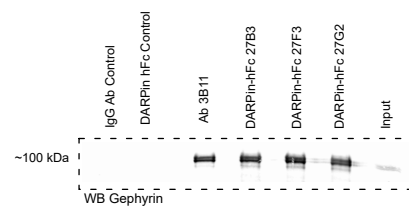

Supplement: supp [file elife-80895-supp-v1.zip › elife_poa_e80895_Figure_5_figure_supplement_1.pdf]

**A**

Interactor enrichment

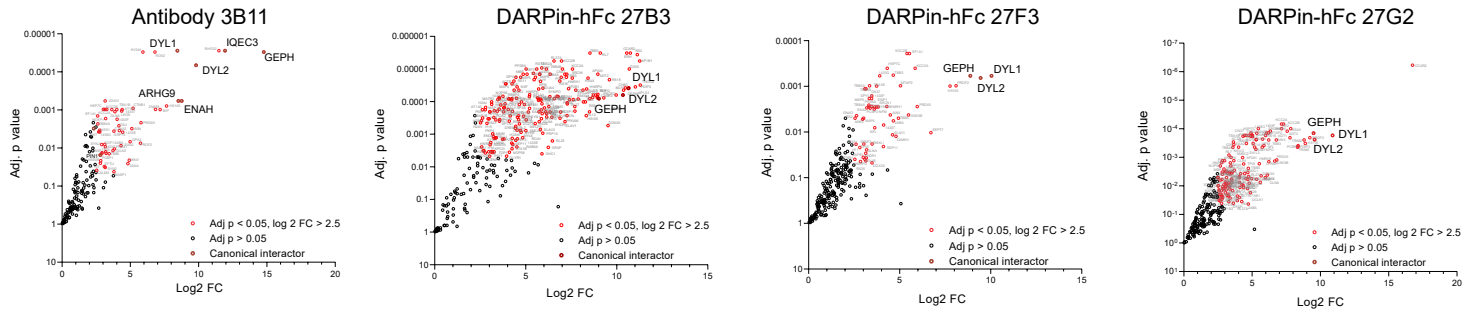

**B**

Interactor abundance

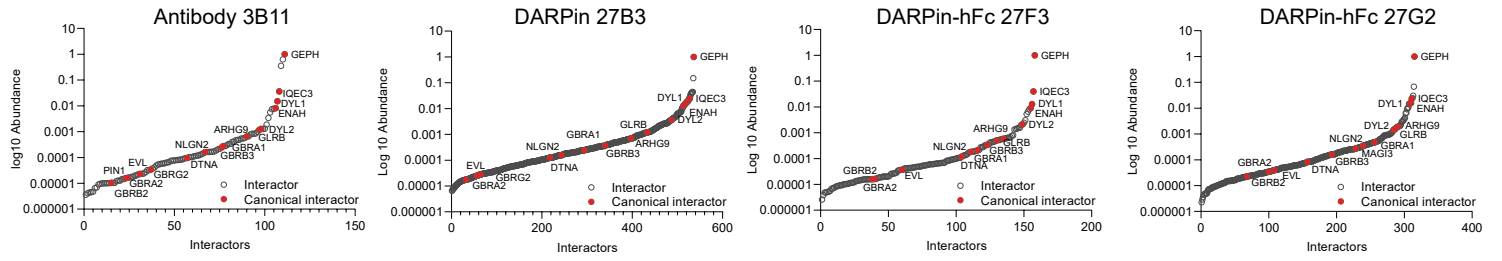

Supplement: supp [file elife-80895-supp-v1.zip › elife_poa_e80895_Figure_5_figure_supplement_2.pdf]

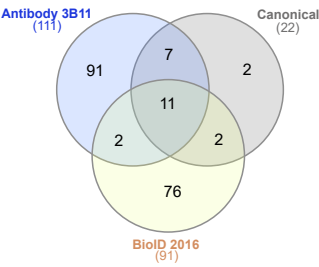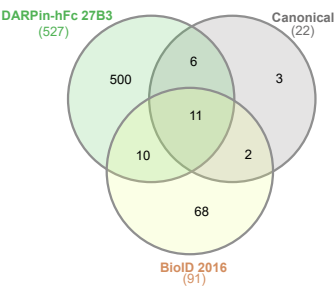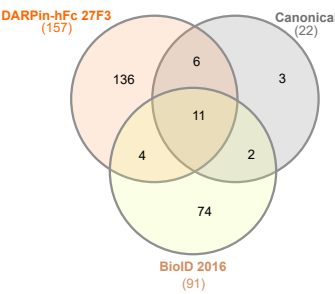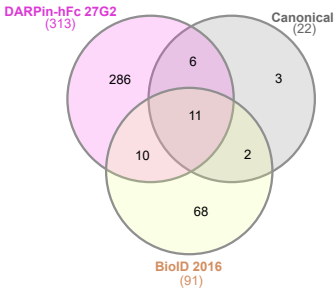

Supplement: supp [file elife-80895-supp-v1.zip › elife_poa_e80895_Figure_5_figure_supplement_3.pdf]

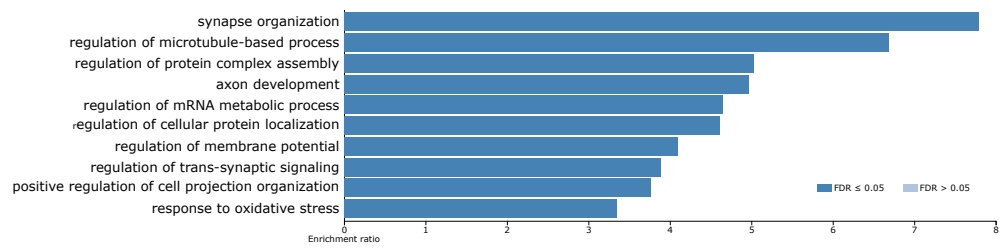

Supplement: supp [file elife-80895-supp-v1.zip › elife_poa_e80895_Figure_5_figure_supplement_4.pdf]

**A**

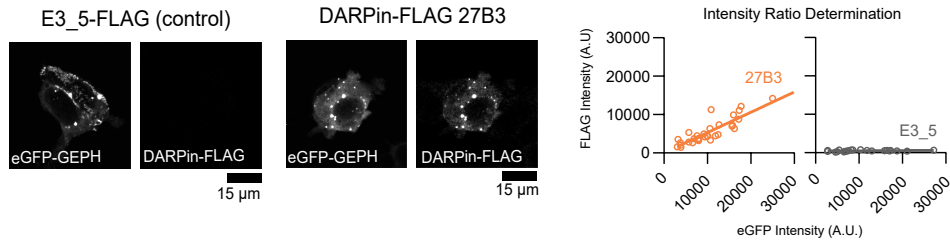

**B**

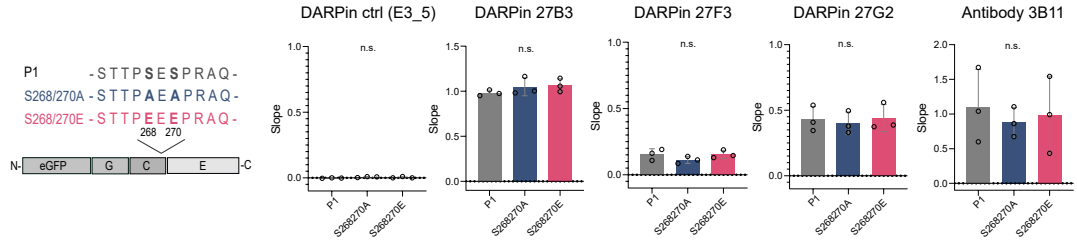

**C**

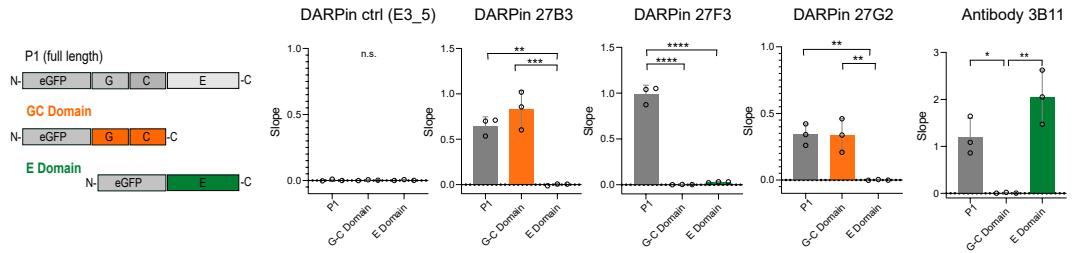

**D**

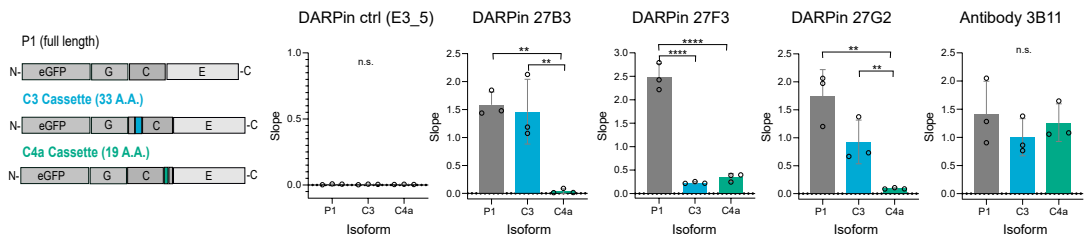

Supplement: supp [file elife-80895-supp-v1.zip › elife_poa_e80895_Figure_6_figure_supplement_2.pdf]

Myelin Sheath

DARPin-hFc clone

27B3 27F3 27G2 id

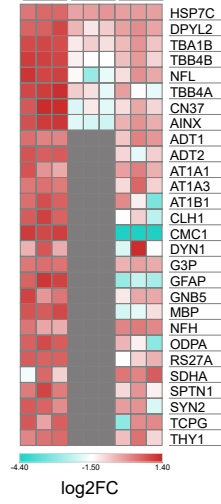

Glial Projection

DARPin-hFc clone

27B3 27F3 27G2 id

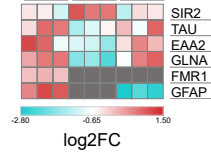

Supplement: supp [file elife-80895-supp-v1.zip › elife_poa_e80895_Figure_6_figure_supplement_3.pdf]

Full labelled Coomassie gel from Figure 1 H

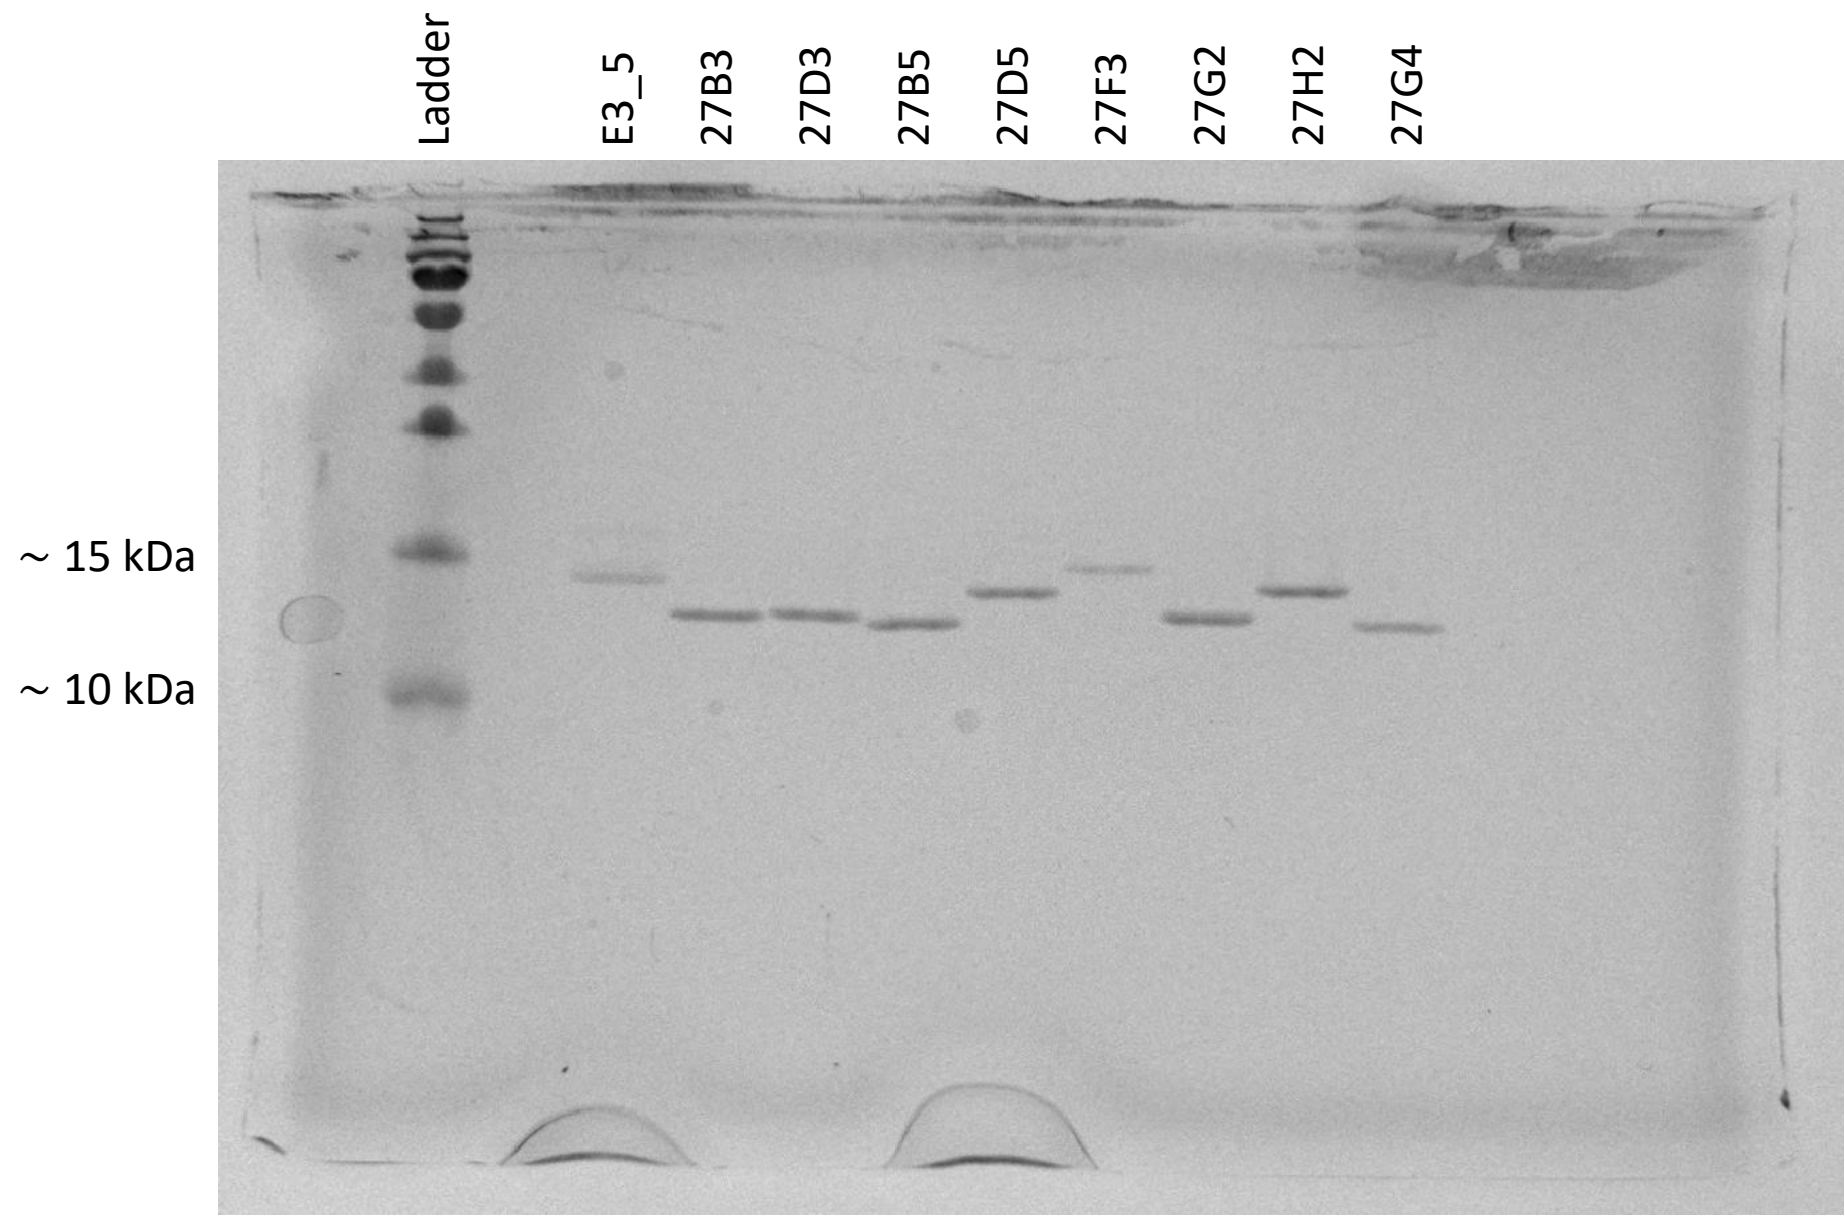

Supplement: supp [file elife-80895-supp-v1.zip › elife_poa_e80895_Figure_1_source_data_1.pdf]

Immunoblot of gephyrin (detected using anti-mouse DyeLight 800)

~ 100 kDa

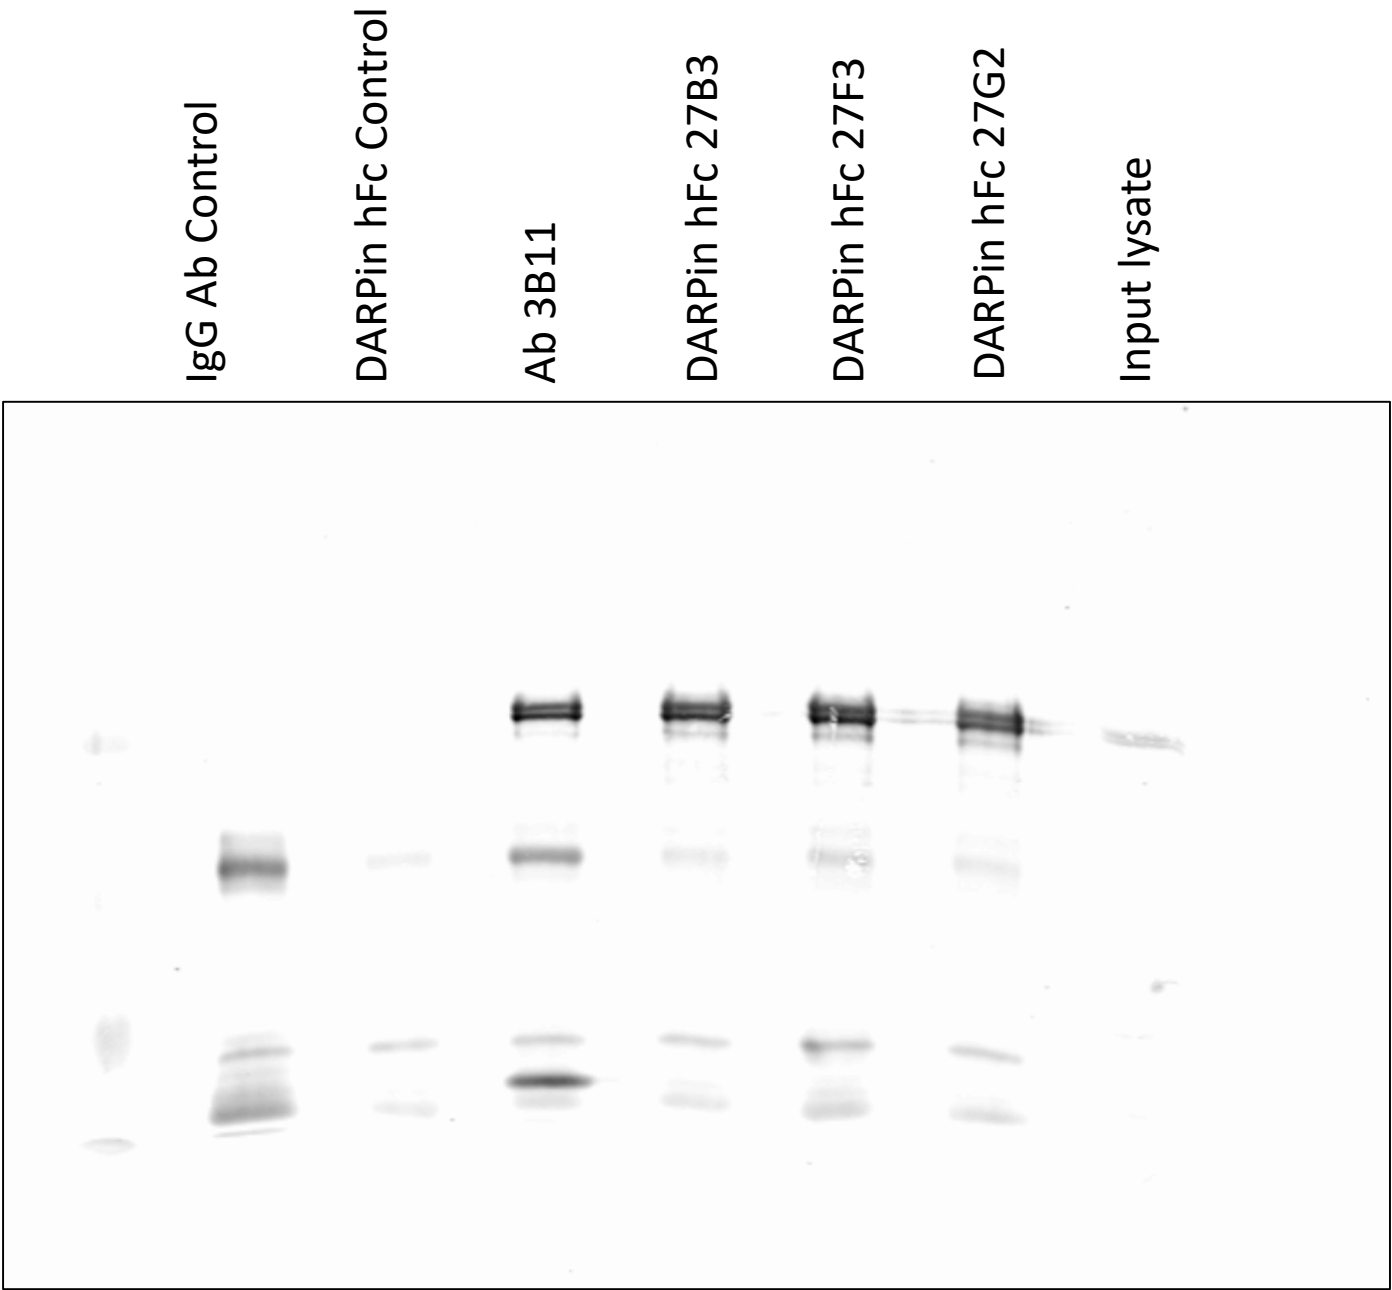

Supplement: supp [file elife-80895-supp-v1.zip › elife_poa_e80895_Figure_5_source_data_2.pdf]
